# Supplementary material
Source: Research Square preprint supplement (doi:10.21203/rs.3.rs-9409886/v1)
Supplement: Supplementary file 1 [file 0268760e772dca250de77599.xlsx]

## Sheet: Sheet1
Histomorphology Analysis of Stomach Tissues between F. cancrivora (FC) and F. multistriata (FM)
muscle-thickness: muscle layer thickness ( μm)
villus-height : "villus-highth" in the table appears to be a typo (μm)
villus cell-thickness : "cell-thickess" in the table appears to be a typo ( μm)
diameter: Diameter of stomach cross section ( μm)
sample	FC-S-1	FC-S-2	FC-S-3	FM-S-1	FM-S-2	FM-S-3
muscle-thickness	781.73	766.87	942.59	481.81	685.92	417.42
muscle-thickness	934.27	720.22	1126.92	514.57	634.71	347.6
muscle-thickness	630.86	906.9	993.16	442.01	512.42	433.64
muscle-thickness	656.33	890.71	943.98	414.3	633.49	387.83
muscle-thickness	705.56	812.57	920.31	390.34	602.98	419.84
villus-highth	1531.76	2230.25	1743.34	1335.39	1100	816.47
villus-highth	1369.57	1964.09	1555.61	1090.43	999.48	927.73
villus-highth	1176.57	1580.24	1617.23	869.33	869.67	963.96
villus-highth	1295.23	1627.74	1908.91		689.39
villus-highth	1364.92	1472.39	1842.23
villus cell-thickess	407.36	476.91	480.76	346.93	346.96	357.67
villus cell-thickess	442.81	470.96	467	389.39	414.91	309.06
villus cell-thickess	467.06	417.9	435.44	479.39	368.24	218.09
villus cell-thickess	372.8	504.34	381.18	341.72	376.51	329.59
villus cell-thickess	402.83	531.09	454.27	344.43	328.45	363.41
diameter	5560.66	6382.67	6860.23	3537.92	3569.04	3093.15

## Sheet: Sheet2
Histomorphology Analysis of Gut Tissues between F. cancrivora (FC) and F. multistriata (FM)
muscle-thickness: muscle layer thickness ( μm)
diameter: Diameter of gut cross section ( μm)
sample	FC-G-1	FC-G-2	FC-G-3	FM-G-1	FM-G-2	FM-G-3
muscle-thickness	32.05	26.51	40.05	41.27	44.21	80.84
muscle-thickness	41.25	45.09	95.84	45.38	57.02	56.5
muscle-thickness	49.66	75.15	43.67	25.08	26.82	45.43
muscle-thickness	34.45	79.32	38.56	32.87	65.53	35.5
muscle-thickness	31	90.04	50.62	11.79	28.45	40.81
diameter	1758.75	2069.32	2570.19	1983.84	2299.09	1656.45
