# Supplementary material
Source: Research Square preprint supplement (doi:10.21203/rs.3.rs-9409886/v1)
Supplement: Supplementary file 1 [file eab7878fad28f709f1b2772c.pdf]

**A** Comparison of relative intestinal length

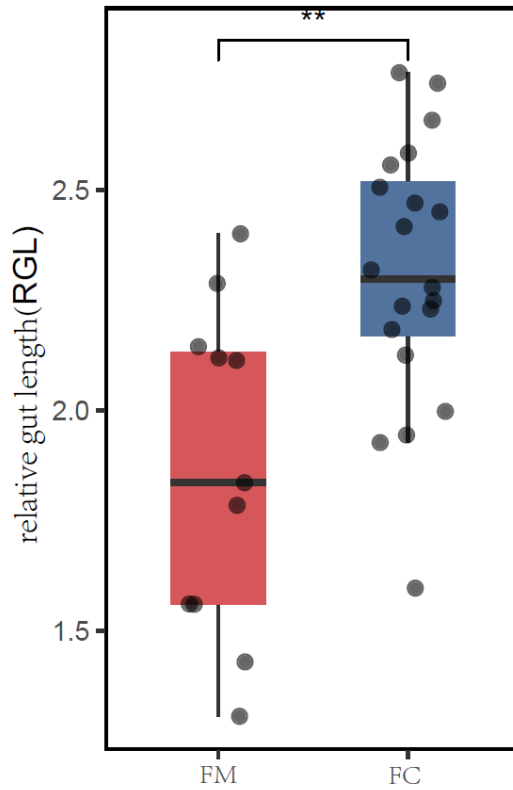

**Supplementary Figure 1.** Comparison of relative gut length (RGL) (gut length / body length): Box plot showing the RGL of FM and FC. The RGL of FC is significantly longer than that of FM (\*\* P-value <0.01, T-test).

CHIA cumulative expression in RNA-seq

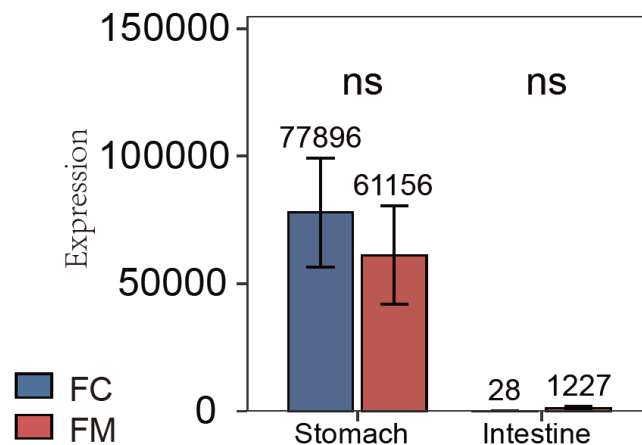

**Supplementary Figure2.** CHIA cumulative expression: RNA-seq data showing the cumulative expression of the CHIA gene in the stomach and intestine. There is no significant difference (ns,

Mann-Whitney U test) between FC and FM in either tissue.

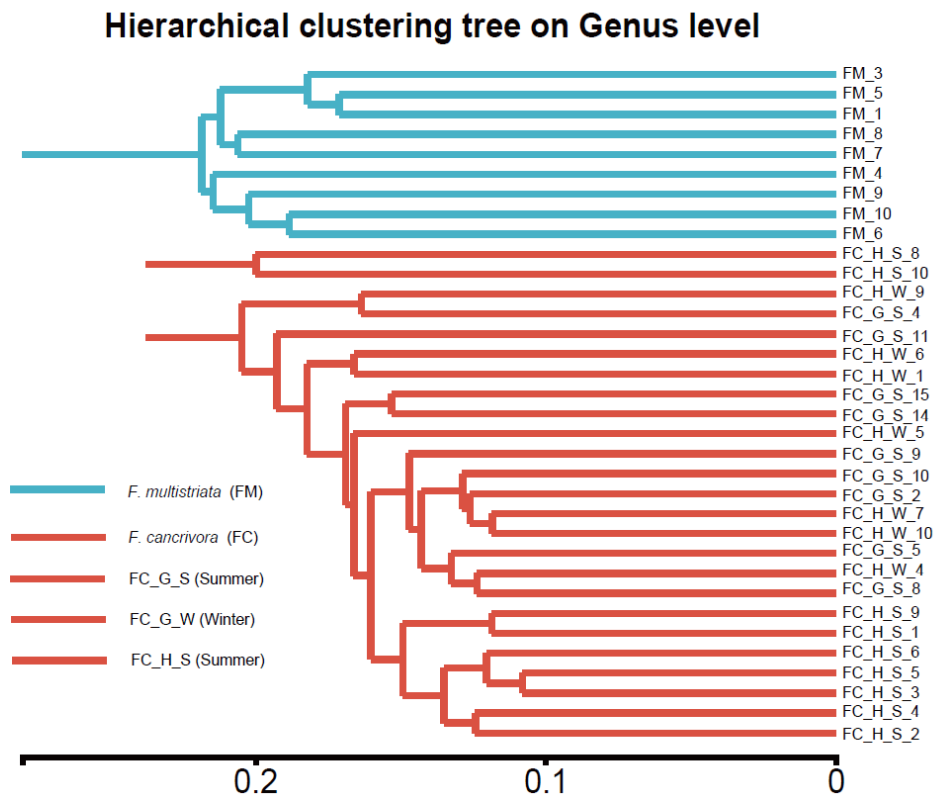

**Supplementary Figure 3.** Gut microbiota clustering: Hierarchical clustering tree at the Genus level, displaying the compositional relationships of gut microbiota among FM and various FC subgroups.

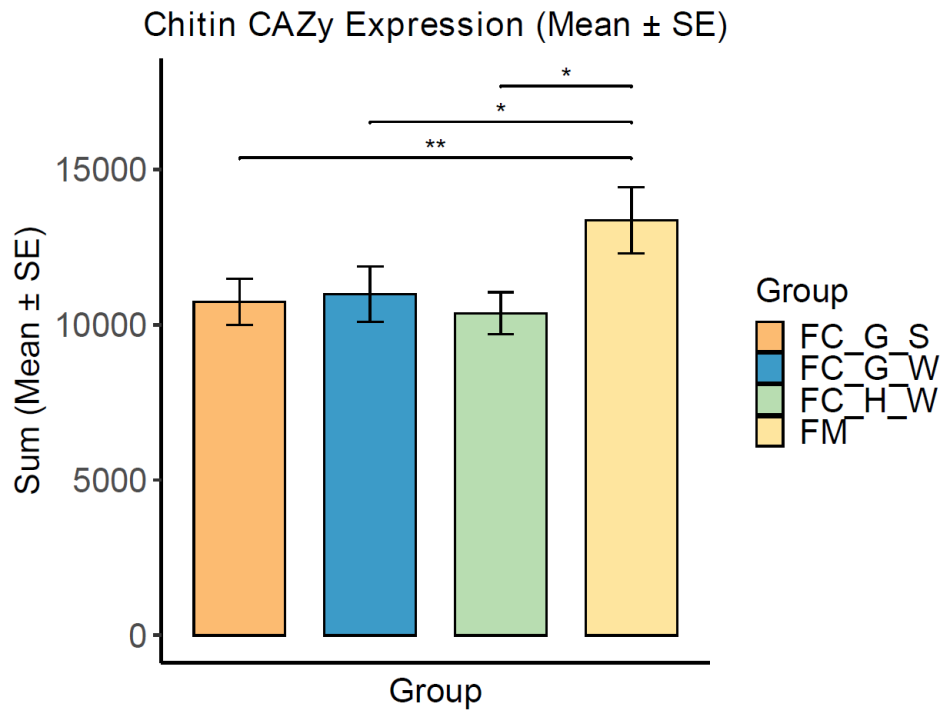

**Supplementary Figure 4.** Gut microbiome Chitin CAZy expression: Comparison of the sum of gut microbiome chitin CAZy expression across different FC groups (FC\_G\_S, FC\_G\_W, FC\_H\_W) and the FM group. The expression in the FM group is significantly higher than in all FC groups (\* : P-value <0.05; \*\*: P-value < 0.01 ).

## Comparison of gut microbiota KEGG function in laboratory FC fed with controlled diet

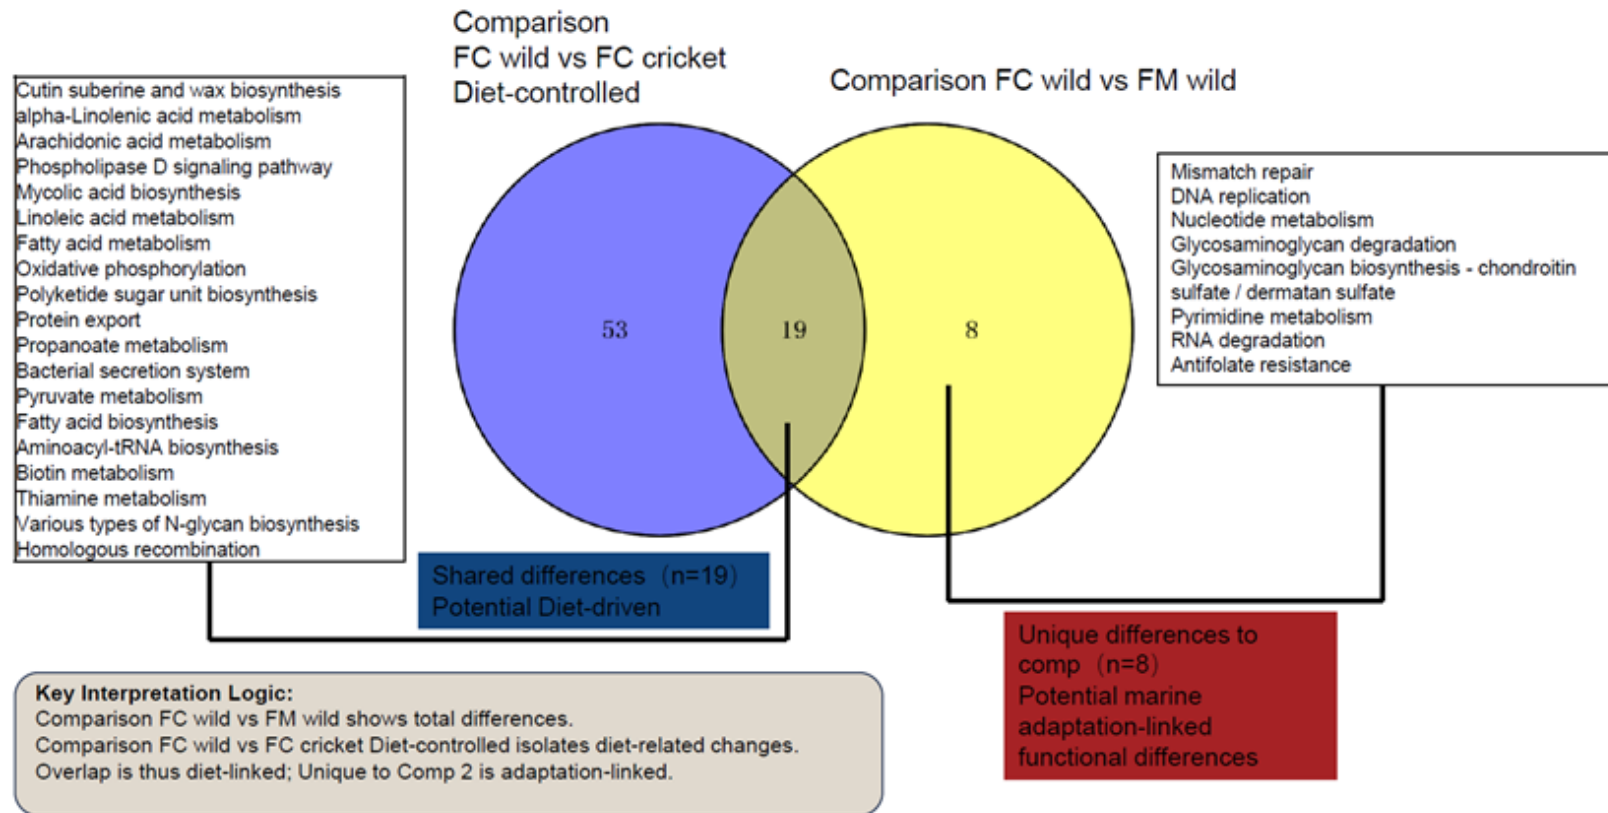

**Supplementary Figure 5.** KEGG functional analysis of gut microbiota: Venn diagram comparing functional differences between "wild FC vs. diet-controlled FC" and "wild FC vs. wild FM". The overlapping region (n=19) represents potential diet-driven functional differences, while the unique region in the wild FC vs. wild FM

comparison (n=8, e.g., DNA replication, mismatch repair) indicates potential functional differences linked to marine adaptation.
