# Supplementary material
Source: Research Square preprint supplement (doi:10.21203/rs.3.rs-9409886/v1)
Supplement: Supplementary file 2 [file 3a3631f81f5c7542a70d1232.xlsx]

## Sheet: raw-reads
Samples	Insert Size (bp)	Raw reads	Raw base (bp)
FM_S_1	498	50934572	7691120372
FM_S_10	493	40363368	6094868568
FM_S_3	486	43562196	6577891596
FM_S_4	486	41807930	6312997430
FM_S_5	478	39417792	5952086592
FM_S_6	489	47152988	7120101188
FM_S_7	495	48384796	7306104196
FM_S_8	507	48510228	7325044428
FM_S_9	468	44597828	6734272028
FC_G_W_1	419	48367274	7303458374
FC_G_W_10	449	44761214	6758943314
FC_G_W_2	430	42939936	6483930336
FC_G_W_3	439	41065554	6200898654
FC_GW_4	434	44441236	6710626636
FC_G_W_5	453	39829972	6014325772
FC_G_W_6	441	44026274	6647967374
FC_G_W_7	447	46859020	7075712020
FC_G_W_8	450	41697080	6296259080
FC_G_W_9	441	45262406	6834623306
FC_G_S_1	464	53822986	8127270886
FC_G_S_10	476	46514420	7023677420
FC_G_S_11	484	43566532	6578546332
FC_G_S_14	456	42889510	6476316010
FC_G_S_15	472	44568032	6729772832
FC_G_S_2	467	45091546	6808823446
FC_G_S_4	463	51947530	7844077030
FC_G_S_5	481	45921320	6934119320
FC_G_S_8	478	41527784	6270695384
FC_G_S_9	485	49189670	7427640170
FC_H_S_1	456	46523986	7025121886
FC_H_S_10	435	43055792	6501424592
FC_H_S_2	431	44591220	6733274220
FC_H_S_3	439	40811356	6162514756
FC_H_S_4	433	43381984	6550679584
FC_H_S_5	437	43338374	6544094474
FC_H_S_6	436	44134770	6664350270
FC_H_S_7	446	45490916	6869128316
FC_H_S_8	426	47317214	7144899314
FC_H_S_9	436	42483022	6414936322

## Sheet: after quali
Samples	Clean reads	Clean base(bp)	Percent in raw reads(%)	Percent in raw bases(%)
FM_S_1	50514896	7612300075	99.176	98.9752
FM_S_10	40021876	6028727843	99.154	98.9148
FM_S_3	43268350	6515342493	99.3255	99.0491
FM_S_4	41450416	6241188496	99.1449	98.8625
FM_S_5	39111912	5894615950	99.224	99.0344
FM_S_6	46727140	7025995240	99.0969	98.6783
FM_S_7	47875808	7202252400	98.948	98.5786
FM_S_8	48061356	7235595762	99.0747	98.7789
FM_S_9	43993260	6617300931	98.6444	98.263
FC_G_W_1	47961034	7193584652	99.1601	98.4956
FC_G_W_10	44420688	6686139010	99.2392	98.9228
FC_G_W_2	42356010	6359626468	98.6401	98.0829
FC_G_W_3	40523868	6085007332	98.6809	98.1311
FC_GW_4	44107696	6627885112	99.2495	98.767
FC_G_W_5	39529276	5950585151	99.2451	98.9402
FC_G_W_6	43634542	6567745780	99.1102	98.7933
FC_G_W_7	46543668	7007041319	99.327	99.0295
FC_G_W_8	40768486	6110520601	97.773	97.05
FC_G_W_9	44601140	6693470232	98.539	97.9347
FC_G_S_1	52806932	7933068288	98.1122	97.6105
FC_G_S_10	46307708	6979461938	99.5556	99.3705
FC_G_S_11	43357712	6532614158	99.5207	99.3018
FC_G_S_14	41933612	6300911113	97.7713	97.2916
FC_G_S_15	44107348	6639792038	98.9663	98.6629
FC_G_S_2	44857268	6759838791	99.4804	99.2806
FC_G_S_4	51567540	7768753075	99.2685	99.0397
FC_G_S_5	45699754	6889566040	99.5175	99.3575
FC_G_S_8	41200828	6207153090	99.2127	98.9867
FC_G_S_9	48792596	7351634624	99.1928	98.9767
FC_H_S_1	46203098	6947534766	99.3103	98.8956
FC_H_S_10	42796250	6439359714	99.3972	99.0454
FC_H_S_2	44243106	6649644838	99.2193	98.758
FC_H_S_3	40529890	6095424038	99.3103	98.9113
FC_H_S_4	43035608	6468337283	99.2016	98.743
FC_H_S_5	43025490	6465922729	99.278	98.8055
FC_H_S_6	43785024	6582852880	99.2075	98.7771
FC_H_S_7	44469330	6641497521	97.7543	96.6862
FC_H_S_8	46922150	7051261733	99.1651	98.6894
FC_H_S_9	42144240	6330888069	99.2025	98.6898

## Sheet: after de ho
Samples	Optimized reads	Optimized bases (bp)	Percent in raw reads (%)	Percent in raw bases (%)
FM_S_1	30957184	4665939393	60.7783	60.6666
FM_S_10	31532908	4751228241	78.1226	77.9546
FM_S_3	32908262	4959924316	75.5432	75.403
FM_S_4	33070064	4981763700	79.1	78.9128
FM_S_5	28733936	4331580456	72.8959	72.7742
FM_S_6	34495816	5192914724	73.1572	72.9332
FM_S_7	41214454	6201459413	85.1806	84.8805
FM_S_8	37642578	5669838485	77.5972	77.4035
FM_S_9	32289912	4860922111	72.4024	72.1818
FC_G_W_1	26990642	4056377998	55.8035	55.5405
FC_G_W_10	26450590	3984999784	59.0927	58.9589
FC_G_W_2	33249472	4994812584	77.4325	77.0337
FC_G_W_3	30621880	4599761950	74.5683	74.179
FC_GW_4	23892854	3596616336	53.7628	53.5958
FC_G_W_5	23203276	3495708487	58.2558	58.123
FC_G_W_6	28186954	4245743666	64.023	63.8653
FC_G_W_7	32863096	4950759376	70.1318	69.9684
FC_G_W_8	33395526	5007312711	80.0908	79.5284
FC_G_W_9	28567812	4288578313	63.116	62.7478
FC_G_S_1	41817622	6293438550	77.6947	77.4361
FC_G_S_10	33375768	5031947693	71.7536	71.6426
FC_G_S_11	27778386	4188292545	63.7608	63.6659
FC_G_S_14	20830804	3133944355	48.5685	48.3908
FC_G_S_15	28086134	4230386235	63.0186	62.8608
FC_G_S_2	38137534	5748091042	84.578	84.4212
FC_G_S_4	32130012	4843155384	61.8509	61.7428
FC_G_S_5	34328458	5175844300	74.7549	74.6431
FC_G_S_8	28502836	4297126434	68.6356	68.5271
FC_G_S_9	32665064	4924011729	66.4063	66.2931
FC_H_S_1	29500258	4444323599	63.4087	63.2633
FC_H_S_10	21888150	3297050774	50.8367	50.7127
FC_H_S_2	31866344	4792940912	71.4633	71.1829
FC_H_S_3	31900868	4800424538	78.1666	77.8972
FC_H_S_4	25797172	3881619042	59.4652	59.2552
FC_H_S_5	24228120	3646548534	55.9045	55.7227
FC_H_S_6	26943072	4055388520	61.0473	60.852
FC_H_S_7	31789478	4761167911	69.8809	69.3125
FC_H_S_8	36412634	5475473627	76.9543	76.6347
FC_H_S_9	22585536	3398789567	53.1637	52.9824

## Sheet: Splicing assembly
Sample	Contigs	Contigs bases(bp)	N50(bp)	N90(bp)	Max(bp)	Min(bp)
FM_S_1	43497	72922549	2855	614	330510	500
FM_S_10	125498	248208789	4194	673	454948	500
FM_S_3	101367	212486013	6187	676	385947	500
FM_S_4	170228	280798391	2537	629	558951	500
FM_S_5	67423	166794379	7370	753	383843	500
FM_S_6	158537	228133549	1972	586	852357	500
FM_S_7	156474	205315018	1571	582	484739	500
FM_S_8	108666	228106920	5151	676	508818	500
FM_S_9	96312	139950570	2044	586	422993	500
FC_G_W_1	21775	20861144	911	542	62327	500
FC_G_W_10	155582	242302362	2174	630	500307	500
FC_G_W_2	94141	70425935	687	524	89303	500
FC_G_W_3	62734	44450178	648	521	90276	500
FC_GW_4	111190	164112964	1879	627	322526	500
FC_G_W_5	82767	121530779	1955	609	214399	500
FC_G_W_6	53341	84058512	2231	627	508548	500
FC_G_W_7	129015	228163463	2910	658	381371	500
FC_G_W_8	107647	94584487	833	538	74728	500
FC_G_W_9	67772	87921653	1600	579	191191	500
FC_G_S_1	210357	178895525	814	539	144677	500
FC_G_S_10	136853	245357402	3132	651	418828	500
FC_G_S_11	44107	74102104	2563	638	254510	500
FC_G_S_14	70185	102571156	2025	595	254040	500
FC_G_S_15	90767	162074230	2948	657	371421	500
FC_G_S_2	164691	269646131	2478	638	372394	500
FC_G_S_4	40146	69290149	2790	639	258011	500
FC_G_S_5	85641	153226046	3276	644	900216	500
FC_G_S_8	73667	134500849	3454	648	671310	500
FC_G_S_9	131694	199460667	2048	618	281363	500
FC_H_S_1	183424	256927325	1746	603	239885	500
FC_H_S_10	60320	86864492	1952	597	325148	500
FC_H_S_2	109751	167046363	2188	606	439459	500
FC_H_S_3	139341	208366999	1967	616	255083	500
FC_H_S_4	89200	140685360	2407	619	232908	500
FC_H_S_5	127090	177725372	1757	595	286421	500
FC_H_S_6	120109	184185001	2207	617	245953	500
FC_H_S_7	148220	165900517	1283	581	404060	500
FC_H_S_8	109127	177537306	2526	622	333443	500
FC_H_S_9	112826	157394752	1813	595	487266	500

## Sheet: predict_gene
Sample	ORFs	Total Length(bp)	Average Length(bp)	Max(bp)	Min(bp)
FM_S_1	96489	64393002	667.36	19554	102
FM_S_10	312606	220020120	703.83	23694	102
FM_S_3	263536	189237972	718.07	15423	102
FM_S_4	362714	246576600	679.81	14769	102
FM_S_5	196850	148012713	751.91	54324	102
FM_S_6	274980	173052558	629.33	17181	102
FM_S_7	291027	184481874	633.9	14526	102
FM_S_8	282458	201809469	714.48	19494	102
FM_S_9	192775	122255886	634.19	14190	102
FC_G_W_1	33178	18209904	548.85	6492	102
FC_G_W_10	323809	215881104	666.69	31161	102
FC_G_W_2	126715	62446053	492.81	7488	102
FC_G_W_3	79876	39544545	495.07	11412	102
FC_GW_4	219576	145692345	663.52	25884	102
FC_G_W_5	159905	101243019	633.14	17121	102
FC_G_W_6	110235	74726187	677.88	25884	102
FC_G_W_7	290353	203609208	701.25	31161	102
FC_G_W_8	159696	81980550	513.35	8994	102
FC_G_W_9	123678	77756625	628.7	20694	102
FC_G_S_1	311519	157145943	504.45	11808	102
FC_G_S_10	315631	217589643	689.38	25884	102
FC_G_S_11	99847	65576460	656.77	17661	102
FC_G_S_14	143624	90916389	633.02	16137	102
FC_G_S_15	208141	142670310	685.45	19677	102
FC_G_S_2	346307	239986812	692.99	50940	102
FC_G_S_4	93059	61363119	659.4	17121	102
FC_G_S_5	194668	135814269	697.67	27876	102
FC_G_S_8	170654	119149026	698.19	51360	102
FC_G_S_9	269763	175343322	649.99	32922	102
FC_H_S_1	344793	228818664	663.64	14304	102
FC_H_S_10	119484	76583859	640.95	14277	102
FC_H_S_2	223554	148840407	665.79	25884	102
FC_H_S_3	281320	184658931	656.4	27876	102
FC_H_S_4	187601	124682571	664.62	27876	102
FC_H_S_5	242865	158330475	651.93	27876	102
FC_H_S_6	240253	163704921	681.39	19242	102
FC_H_S_7	202914	84848214	418.15	10644	102
FC_H_S_8	231107	155763339	673.99	24573	102
FC_H_S_9	207040	134849181	651.32	13719	102

## Sheet: Unique_gene
Sample	Unique number
FM_S_1	189776
FM_S_10	467778
FM_S_3	362499
FM_S_4	515829
FM_S_5	288322
FM_S_6	417791
FM_S_7	464522
FM_S_8	440585
FM_S_9	342028
FC_G_W_1	235325
FC_G_W_10	600334
FC_G_W_2	278904
FC_G_W_3	146966
FC_GW_4	438319
FC_G_W_5	445342
FC_G_W_6	303784
FC_G_W_7	586119
FC_G_W_8	275132
FC_G_W_9	384073
FC_G_S_1	389243
FC_G_S_10	543739
FC_G_S_11	245746
FC_G_S_14	358241
FC_G_S_15	441342
FC_G_S_2	578519
FC_G_S_4	299239
FC_G_S_5	468474
FC_G_S_8	410655
FC_G_S_9	579060
FC_H_S_1	609895
FC_H_S_10	336346
FC_H_S_2	567403
FC_H_S_3	531635
FC_H_S_4	471014
FC_H_S_5	556535
FC_H_S_6	531677
FC_H_S_7	351576
FC_H_S_8	520132
FC_H_S_9	433970
