# Supplementary material
Source: Research Square preprint supplement (doi:10.21203/rs.3.rs-9409886/v1)
Supplement: Supplementary file 3 [file 487b37692b1de9e748599ee1.xlsx]

## Sheet: raw
Samples	Insert Size (bp)	Raw reads	Raw base (bp)
GQ_9	485	49189670	7427640170
c_y_zlw_5	478	39417792	5952086592
c_y_zlw_9	468	44597828	6734272028
c_y_zlw_10	493	40363368	6094868568
sys_zlw_4	456	43287240	6536373240
H9	436	42483022	6414936322
SYS_7	440	46854882	7075087182
H8	426	47317214	7144899314
H7	446	45490916	6869128316
H6	436	44134770	6664350270
H5	437	43338374	6544094474
H4	433	43381984	6550679584
sys_zlw_6	447	43132000	6512932000
H3	439	40811356	6162514756
H2	431	44591220	6733274220
sys_zlw_13	451	44381912	6701668712
H1	456	46523986	7025121886
sys_zlw_3	444	43600744	6583712344
GQ_2	467	45091546	6808823446
GQ_15	472	44568032	6729772832
c_y_zlw_8	507	48510228	7325044428
G9	441	45262406	6834623306
G8	450	41697080	6296259080
G7	447	46859020	7075712020
GQ_5	481	45921320	6934119320
G6	441	44026274	6647967374
G5	453	39829972	6014325772
G4	434	44441236	6710626636
G3	439	41065554	6200898654
c_y_zlw_7	495	48384796	7306104196
G2	430	42939936	6483930336
G1	419	48367274	7303458374
sys_zlw_2	449	43145080	6514907080
SYS_4	440	40487758	6113651458
GQ_14	456	42889510	6476316010
SYS_6	440	39360100	5943375100
SYS_3	440	42490584	6416078184
c_y_zlw_6	489	47152988	7120101188
GQ_8	478	41527784	6270695384
sys_zlw_12	456	43154120	6516272120
H10	435	43055792	6501424592
sys_zlw_9	458	42734570	6452920070
sys_zlw_11	450	43316934	6540857034
sys_zlw_1	451	43240244	6529276844
G10	449	44761214	6758943314
GQ_10	476	46514420	7023677420
SYS_2	440	44445196	6711224596
sys_zlw_7	449	41432708	6256338908
c_y_zlw_4	486	41807930	6312997430
SYS_1	440	47149538	7119580238
c_y_zlw_3	486	43562196	6577891596
c_y_zlw_1	498	50934572	7691120372
SYS_5	440	41521352	6269724152
GQ_4	463	51947530	7844077030
GQ_1	464	53822986	8127270886
GQ_11	484	43566532	6578546332

## Sheet: quality control
Samples	Clean reads	Clean base(bp)	Percent in raw reads(%)	Percent in raw bases(%)
GQ_9	48792596	7351634624	99.1928	98.9767
c_y_zlw_5	39111912	5894615950	99.224	99.0344
c_y_zlw_9	43993260	6617300931	98.6444	98.263
c_y_zlw_10	40021876	6028727843	99.154	98.9148
sys_zlw_4	42927264	6462619212	99.1684	98.8716
H9	42144240	6330888069	99.2025	98.6898
SYS_7	46677904	7030714476	99.6223	99.3728
H8	46922150	7051261733	99.1651	98.6894
H7	44469330	6641497521	97.7543	96.6862
H6	43785024	6582852880	99.2075	98.7771
H5	43025490	6465922729	99.278	98.8055
H4	43035608	6468337283	99.2016	98.743
sys_zlw_6	41977450	6311560875	97.3232	96.9081
H3	40529890	6095424038	99.3103	98.9113
H2	44243106	6649644838	99.2193	98.758
sys_zlw_13	43942292	6614837514	99.0095	98.7043
H1	46203098	6947534766	99.3103	98.8956
sys_zlw_3	42468468	6387538660	97.4031	97.0203
GQ_2	44857268	6759838791	99.4804	99.2806
GQ_15	44107348	6639792038	98.9663	98.6629
c_y_zlw_8	48061356	7235595762	99.0747	98.7789
G9	44601140	6693470232	98.539	97.9347
G8	40768486	6110520601	97.773	97.05
G7	46543668	7007041319	99.327	99.0295
GQ_5	45699754	6889566040	99.5175	99.3575
G6	43634542	6567745780	99.1102	98.7933
G5	39529276	5950585151	99.2451	98.9402
G4	44107696	6627885112	99.2495	98.767
G3	40523868	6085007332	98.6809	98.1311
c_y_zlw_7	47875808	7202252400	98.948	98.5786
G2	42356010	6359626468	98.6401	98.0829
G1	47961034	7193584652	99.1601	98.4956
sys_zlw_2	42828606	6446109346	99.2665	98.944
SYS_4	40346478	6076995859	99.6511	99.4004
GQ_14	41933612	6300911113	97.7713	97.2916
SYS_6	39204716	5899694817	99.6052	99.2651
SYS_3	42316122	6370806437	99.5894	99.2944
c_y_zlw_6	46727140	7025995240	99.0969	98.6783
GQ_8	41200828	6207153090	99.2127	98.9867
sys_zlw_12	42349236	6360379161	98.1349	97.6076
H10	42796250	6439359714	99.3972	99.0454
sys_zlw_9	41766070	6279154443	97.7337	97.3072
sys_zlw_11	41258456	6207299377	95.2479	94.9004
sys_zlw_1	42859412	6452246252	99.1193	98.8202
G10	44420688	6686139010	99.2392	98.9228
GQ_10	46307708	6979461938	99.5556	99.3705
SYS_2	44255284	6662510663	99.5727	99.2741
sys_zlw_7	39425950	5933199098	95.1566	94.835
c_y_zlw_4	41450416	6241188496	99.1449	98.8625
SYS_1	46758446	7029072369	99.1705	98.7287
c_y_zlw_3	43268350	6515342493	99.3255	99.0491
c_y_zlw_1	50514896	7612300075	99.176	98.9752
SYS_5	41340520	6215169392	99.5645	99.1299
GQ_4	51567540	7768753075	99.2685	99.0397
GQ_1	52806932	7933068288	98.1122	97.6105
GQ_11	43357712	6532614158	99.5207	99.3018

## Sheet: filter host
Samples	Optimized reads	Optimized bases (bp)	Percent in raw reads (%)	Percent in raw bases (%)
G1	26990642	4056377998	55.8035	55.5405
G10	26450590	3984999784	59.0927	58.9589
G2	33249472	4994812584	77.4325	77.0337
G3	30621880	4599761950	74.5683	74.179
G4	23892854	3596616336	53.7628	53.5958
G5	23203276	3495708487	58.2558	58.123
G6	28186954	4245743666	64.023	63.8653
G7	32863096	4950759376	70.1318	69.9684
G8	33395526	5007312711	80.0908	79.5284
G9	28567812	4288578313	63.116	62.7478
GQ_1	41817622	6293438550	77.6947	77.4361
GQ_10	33375768	5031947693	71.7536	71.6426
GQ_11	27778386	4188292545	63.7608	63.6659
GQ_14	20830804	3133944355	48.5685	48.3908
GQ_15	28086134	4230386235	63.0186	62.8608
GQ_2	38137534	5748091042	84.578	84.4212
GQ_4	32130012	4843155384	61.8509	61.7428
GQ_5	34328458	5175844300	74.7549	74.6431
GQ_8	28502836	4297126434	68.6356	68.5271
GQ_9	32665064	4924011729	66.4063	66.2931
H1	29500258	4444323599	63.4087	63.2633
H10	21888150	3297050774	50.8367	50.7127
H2	31866344	4792940912	71.4633	71.1829
H3	31900868	4800424538	78.1666	77.8972
H4	25797172	3881619042	59.4652	59.2552
H5	24228120	3646548534	55.9045	55.7227
H6	26943072	4055388520	61.0473	60.852
H7	31789478	4761167911	69.8809	69.3125
H8	36412634	5475473627	76.9543	76.6347
H9	22585536	3398789567	53.1637	52.9824
SYS_1	16973034	2558934676	35.9983	35.9422
SYS_2	18153114	2737868446	40.8438	40.7954
SYS_3	19949302	3008391562	46.9499	46.8883
SYS_4	17089722	2577846035	42.2096	42.1654
SYS_5	18790990	2831584212	45.2562	45.1628
SYS_6	15653232	2360590325	39.7693	39.718
SYS_7	24437308	3685068639	52.1553	52.0851
c_y_zlw_1	30957184	4665939393	60.7783	60.6666
c_y_zlw_10	31532908	4751228241	78.1226	77.9546
c_y_zlw_3	32908262	4959924316	75.5432	75.403
c_y_zlw_4	33070064	4981763700	79.1	78.9128
c_y_zlw_5	28733936	4331580456	72.8959	72.7742
c_y_zlw_6	34495816	5192914724	73.1572	72.9332
c_y_zlw_7	41214454	6201459413	85.1806	84.8805
c_y_zlw_8	37642578	5669838485	77.5972	77.4035
c_y_zlw_9	32289912	4860922111	72.4024	72.1818
sys_zlw_1	33140084	4988792459	76.6418	76.4065
sys_zlw_11	27494302	4136669097	63.4724	63.2435
sys_zlw_12	30101952	4523484046	69.7545	69.4183
sys_zlw_13	34700362	5223633489	78.1858	77.9453
sys_zlw_2	33185064	4994080597	76.9151	76.6562
sys_zlw_3	27399886	4120670879	62.8427	62.5889
sys_zlw_4	30869398	4646491026	71.3129	71.0867
sys_zlw_6	27218066	4093303657	63.1041	62.8489
sys_zlw_7	26635784	4007985986	64.2869	64.0628
sys_zlw_9	30443316	4577829884	71.2381	70.942

## Sheet: assemble_stat
Sample	Contigs	Contigs bases(bp)	N50(bp)	N90(bp)	Max(bp)	Min(bp)
GQ_4	40146	69290149	2790	639	258011	500
c_y_zlw_1	43497	72922549	2855	614	330510	500
H2	109751	167046363	2188	606	439459	500
GQ_11	44107	74102104	2563	638	254510	500
G10	155582	242302362	2174	630	500307	500
GQ_15	90767	162074230	2948	657	371421	500
H6	120109	184185001	2207	617	245953	500
H7	148220	165900517	1283	581	404060	500
GQ_10	136853	245357402	3132	651	418828	500
c_y_zlw_4	170228	280798391	2537	629	558951	500
GQ_5	85641	153226046	3276	644	900216	500
G2	94141	70425935	687	524	89303	500
SYS_3	65826	108148822	2806	614	466701	500
sys_zlw_6	58055	103147817	3442	625	499072	500
c_y_zlw_8	108666	228106920	5151	676	508818	500
c_y_zlw_6	158537	228133549	1972	586	852357	500
sys_zlw_3	98764	140798072	1822	615	199007	500
SYS_1	26571	53551006	4442	684	479449	500
sys_zlw_9	136498	215764219	2417	616	876698	500
G7	129015	228163463	2910	658	381371	500
c_y_zlw_5	67423	166794379	7370	753	383843	500
GQ_1	210357	178895525	814	539	144677	500
H9	112826	157394752	1813	595	487266	500
SYS_7	51830	89304009	2947	627	489232	500
G4	111190	164112964	1879	627	322526	500
G5	82767	121530779	1955	609	214399	500
H8	109127	177537306	2526	622	333443	500
G6	53341	84058512	2231	627	508548	500
H4	89200	140685360	2407	619	232908	500
c_y_zlw_10	125498	248208789	4194	673	454948	500
sys_zlw_13	6164	13858273	13563	680	1250107	500
sys_zlw_1	41503	55849592	1564	592	355361	500
c_y_zlw_3	101367	212486013	6187	676	385947	500
G8	107647	94584487	833	538	74728	500
G3	62734	44450178	648	521	90276	500
sys_zlw_2	25635	38371866	2041	632	198906	500
GQ_14	70185	102571156	2025	595	254040	500
sys_zlw_11	67299	113436987	2843	623	490642	500
sys_zlw_4	50851	90603702	3896	622	336831	500
G1	21775	20861144	911	542	62327	500
H10	60320	86864492	1952	597	325148	500
GQ_9	131694	199460667	2048	618	281363	500
G9	67772	87921653	1600	579	191191	500
sys_zlw_12	25547	86223338	8735	1101	673742	500
GQ_8	73667	134500849	3454	648	671310	500
SYS_6	17690	20603857	1260	567	194435	500
SYS_5	89102	128322753	1885	607	402660	500
H5	127090	177725372	1757	595	286421	500
sys_zlw_7	45684	83353656	3235	651	876698	500
c_y_zlw_9	96312	139950570	2044	586	422993	500
H1	183424	256927325	1746	603	239885	500
GQ_2	164691	269646131	2478	638	372394	500
SYS_4	7427	9788299	1516	600	164398	500
SYS_2	14547	19908261	1713	594	184790	500
c_y_zlw_7	156474	205315018	1571	582	484739	500
H3	139341	208366999	1967	616	255083	500

## Sheet: predict_gene
Sample	ORFs	Total Length(bp)	Average Length(bp)	Max(bp)	Min(bp)	Unique number
sys_zlw_4	119329	80525811	674.82	16812	102	467778
SYS_5	170648	115409190	676.3	25884	102	245746
G4	219576	145692345	663.52	25884	102	543739
SYS_2	28989	17804964	614.2	11376	102	586119
c_y_zlw_9	192775	122255886	634.19	14190	102	303784
H1	344793	228818664	663.64	14304	102	200091
H3	281320	184658931	656.4	27876	102	438319
SYS_3	142654	96576897	677	27876	102	220513
c_y_zlw_1	96489	64393002	667.36	19554	102	278904
H9	207040	134849181	651.32	13719	102	235325
H2	223554	148840407	665.79	25884	102	260883
H7	202914	84848214	418.15	10644	102	410491
GQ_8	170654	119149026	698.19	51360	102	152564
GQ_11	99847	65576460	656.77	17661	102	384073
G2	126715	62446053	492.81	7488	102	275132
sys_zlw_2	53747	34062591	633.76	14241	102	468474
G7	290353	203609208	701.25	31161	102	351235
sys_zlw_6	133355	89355066	670.05	10815	102	600334
G9	123678	77756625	628.7	20694	102	285385
GQ_9	269763	175343322	649.99	32922	102	579060
c_y_zlw_3	263536	189237972	718.07	15423	102	410655
H10	119484	76583859	640.95	14277	102	114039
SYS_1	67554	47586432	704.42	16887	102	336346
SYS_4	14794	8926305	603.37	10851	102	299239
SYS_6	32095	18209247	567.35	10950	102	389243
H8	231107	155763339	673.99	24573	102	445342
sys_zlw_13	17144	12177348	710.3	14610	102	578519
H4	187601	124682571	664.62	27876	102	342028
SYS_7	113570	80177376	705.97	17952	102	440585
GQ_10	315631	217589643	689.38	25884	102	433970
sys_zlw_12	77102	33950916	440.34	11223	102	362499
G6	110235	74726187	677.88	25884	102	146966
sys_zlw_7	109288	73954764	676.7	14460	102	189776
sys_zlw_9	285456	191044197	669.26	11892	102	464522
sys_zlw_1	82379	49451979	600.3	10077	102	417791
GQ_5	194668	135814269	697.67	27876	102	288322
sys_zlw_3	195528	124552875	637.01	12504	102	515829
c_y_zlw_6	274980	173052558	629.33	17181	102	296294
G8	159696	81980550	513.35	8994	102	129792
GQ_2	346307	239986812	692.99	50940	102	520132
sys_zlw_11	148739	100260135	674.07	14511	102	58196
GQ_15	208141	142670310	685.45	19677	102	322899
GQ_4	93059	61363119	659.4	17121	102	131702
G1	33178	18209904	548.85	6492	102	211018
GQ_14	143624	90916389	633.02	16137	102	441342
c_y_zlw_5	196850	148012713	751.91	54324	102	358241
GQ_1	311519	157145943	504.45	11808	102	609895
c_y_zlw_8	282458	201809469	714.48	19494	102	531677
c_y_zlw_7	291027	184481874	633.9	14526	102	351576
G3	79876	39544545	495.07	11412	102	471014
H5	242865	158330475	651.93	27876	102	556535
G10	323809	215881104	666.69	31161	102	567403
c_y_zlw_4	362714	246576600	679.81	14769	102	531635
c_y_zlw_10	312606	220020120	703.83	23694	102	43808
H6	240253	163704921	681.39	19242	102	93980
G5	159905	101243019	633.14	17121	102	288196
