# Supplementary material
Source: Research Square preprint supplement (doi:10.21203/rs.3.rs-9409886/v1)
Supplement: Supplementary file 4 [file 8ce921fed55bbbd7fbbc96bf.xlsx]

## Sheet: Significant_KEGG_Top10_Genus_St
KEGG_Pathway	Group	Genus	Mean_RPKM	Percentage_in_Top10	Pathway_P_value	Sig_Status
Aminoacyl-tRNA biosynthesis	HLW	g__Clostridium	944.809	24.639	0.025527	FC_Expansion
Aminoacyl-tRNA biosynthesis	HLW	g__Breznakia	817.584	21.3212	0.025527	FC_Expansion
Aminoacyl-tRNA biosynthesis	HLW	g__Anaerorhabdus	436.929	11.3944	0.025527	NA
Aminoacyl-tRNA biosynthesis	HLW	g__unclassified_f__Nitrososphaeraceae	304.661	7.94502	0.025527	NA
Aminoacyl-tRNA biosynthesis	HLW	g__Amedibacterium	241.312	6.29301	0.025527	NA
Aminoacyl-tRNA biosynthesis	HLW	g__Christensenella	240.117	6.26184	0.025527	NA
Aminoacyl-tRNA biosynthesis	HLW	g__Methyloceanibacter	230.863	6.02052	0.025527	FC_Expansion
Aminoacyl-tRNA biosynthesis	HLW	g__Candidatus_Avidesulfovibrio	220.957	5.76219	0.025527	NA
Aminoacyl-tRNA biosynthesis	HLW	g__Desulfovibrio	210.509	5.4897	0.025527	FC_Expansion
Aminoacyl-tRNA biosynthesis	HLW	g__Bilophila	186.868	4.87319	0.025527	NA
Aminoacyl-tRNA biosynthesis	ZLW	g__unclassified_p__Bacillota	1489.12	30.9526	0.025527	NA
Aminoacyl-tRNA biosynthesis	ZLW	g__Methanobrevibacter	930.64	19.3441	0.025527	NA
Aminoacyl-tRNA biosynthesis	ZLW	g__Clostridium	594.6	12.3593	0.025527	FC_Expansion
Aminoacyl-tRNA biosynthesis	ZLW	g__Anaerorhabdus	502.666	10.4483	0.025527	NA
Aminoacyl-tRNA biosynthesis	ZLW	g__Kineothrix	267.215	5.55429	0.025527	NA
Aminoacyl-tRNA biosynthesis	ZLW	g__Desulfovibrio	260.759	5.4201	0.025527	FC_Expansion
Aminoacyl-tRNA biosynthesis	ZLW	g__Bilophila	219.244	4.55717	0.025527	NA
Aminoacyl-tRNA biosynthesis	ZLW	g__Lachnoclostridium	205.929	4.28041	0.025527	NA
Aminoacyl-tRNA biosynthesis	ZLW	g__unclassified_f__Nitrososphaeraceae	173.485	3.60603	0.025527	NA
Aminoacyl-tRNA biosynthesis	ZLW	g__Ruthenibacterium	167.308	3.47763	0.025527	NA
Antifolate resistance	HLW	g__Breznakia	327.638	47.007	4.77e-05	FC_Expansion
Antifolate resistance	HLW	g__Clostridium	133.542	19.1596	4.77e-05	FC_Expansion
Antifolate resistance	HLW	g__unclassified_c__Caudoviricetes	52.6673	7.55631	4.77e-05	FC_Expansion
Antifolate resistance	HLW	g__Alistipes	37.7148	5.41103	4.77e-05	FC_Expansion
Antifolate resistance	HLW	g__Candidatus_Avidesulfovibrio	33.5685	4.81615	4.77e-05	NA
Antifolate resistance	HLW	g__Anaerorhabdus	32.7917	4.7047	4.77e-05	NA
Antifolate resistance	HLW	g__Desulfovibrio	22.2936	3.19852	4.77e-05	FC_Expansion
Antifolate resistance	HLW	g__Vibrio	20.8076	2.98532	4.77e-05	FC_Expansion
Antifolate resistance	HLW	g__Christensenella	18.7458	2.6895	4.77e-05	NA
Antifolate resistance	HLW	g__Mycoplasma	17.2287	2.47185	4.77e-05	FC_Expansion
Antifolate resistance	ZLW	g__Methanobrevibacter	104.664	22.5928	4.77e-05	NA
Antifolate resistance	ZLW	g__Clostridium	70.3864	15.1936	4.77e-05	FC_Expansion
Antifolate resistance	ZLW	g__Anaerorhabdus	58.6168	12.6531	4.77e-05	NA
Antifolate resistance	ZLW	g__Lachnoclostridium	48.2901	10.4239	4.77e-05	NA
Antifolate resistance	ZLW	g__Amedibacterium	39.9326	8.61986	4.77e-05	NA
Antifolate resistance	ZLW	g__Zhaonella	30.892	6.66836	4.77e-05	NA
Antifolate resistance	ZLW	g__Kineothrix	29.8278	6.43864	4.77e-05	NA
Antifolate resistance	ZLW	g__Candidatus_Avidesulfovibrio	27.4162	5.91808	4.77e-05	NA
Antifolate resistance	ZLW	g__unclassified_f__Erysipelotrichaceae	26.8756	5.80137	4.77e-05	NA
Antifolate resistance	ZLW	g__Candidatus_Stoquefichus	26.3606	5.69021	4.77e-05	NA
Arachidonic acid metabolism	HLW	g__Vibrio	7.28494	14.4101	0.000144696	FC_Expansion
Arachidonic acid metabolism	HLW	g__Photobacterium	7.20515	14.2523	0.000144696	FC_Expansion
Arachidonic acid metabolism	HLW	g__Spraguea	6.36971	12.5997	0.000144696	NA
Arachidonic acid metabolism	HLW	g__Methyloceanibacter	6.20373	12.2714	0.000144696	FC_Expansion
Arachidonic acid metabolism	HLW	g__Clostridium	6.17505	12.2147	0.000144696	FC_Expansion
Arachidonic acid metabolism	HLW	g__Rhodoflexus	5.99117	11.851	0.000144696	FC_Expansion
Arachidonic acid metabolism	HLW	g__Plesiomonas	4.53217	8.96495	0.000144696	NA
Arachidonic acid metabolism	HLW	g__Tubulinosema	2.50093	4.94702	0.000144696	NA
Arachidonic acid metabolism	HLW	g__unclassified_f__Nitrososphaeraceae	2.36436	4.67688	0.000144696	NA
Arachidonic acid metabolism	HLW	g__Mycolicibacterium	1.9271	3.81194	0.000144696	FC_Expansion
Arachidonic acid metabolism	ZLW	g__Parabacteroides	2.0998	26.1236	0.000144696	NA
Arachidonic acid metabolism	ZLW	g__unclassified_p__Candidatus_Omnitrophota	1.46848	18.2694	0.000144696	NA
Arachidonic acid metabolism	ZLW	g__Scandinavium	1.05469	13.1214	0.000144696	NA
Arachidonic acid metabolism	ZLW	g__Cylindrospermum	0.885103	11.0115	0.000144696	NA
Arachidonic acid metabolism	ZLW	g__Candidatus_Avichristensenella	0.552717	6.87635	0.000144696	NA
Arachidonic acid metabolism	ZLW	g__Anabaena	0.501704	6.24169	0.000144696	NA
Arachidonic acid metabolism	ZLW	g__Clostridium	0.446159	5.55066	0.000144696	FC_Expansion
Arachidonic acid metabolism	ZLW	g__Brachyspira	0.386604	4.80974	0.000144696	NA
Arachidonic acid metabolism	ZLW	g__Basidiobolus	0.328008	4.08075	0.000144696	NA
Arachidonic acid metabolism	ZLW	g__Furculomyces	0.314676	3.91488	0.000144696	NA
Bacterial secretion system	HLW	g__Breznakia	607.583	23.8249	0.00626968	FC_Expansion
Bacterial secretion system	HLW	g__Clostridium	360.639	14.1415	0.00626968	FC_Expansion
Bacterial secretion system	HLW	g__Desulfovibrio	354.071	13.884	0.00626968	FC_Expansion
Bacterial secretion system	HLW	g__Bilophila	320.226	12.5569	0.00626968	NA
Bacterial secretion system	HLW	g__Vibrio	245.948	9.64425	0.00626968	FC_Expansion
Bacterial secretion system	HLW	g__Bacteroides	199.656	7.82902	0.00626968	FC_Expansion
Bacterial secretion system	HLW	g__Plesiomonas	123.835	4.8559	0.00626968	NA
Bacterial secretion system	HLW	g__Christensenella	123.114	4.82762	0.00626968	NA
Bacterial secretion system	HLW	g__Alistipes	108.383	4.24997	0.00626968	FC_Expansion
Bacterial secretion system	HLW	g__Anaerorhabdus	106.75	4.18592	0.00626968	NA
Bacterial secretion system	ZLW	g__Desulfovibrio	465.107	21.4277	0.00626968	FC_Expansion
Bacterial secretion system	ZLW	g__Bilophila	354.768	16.3443	0.00626968	NA
Bacterial secretion system	ZLW	g__unclassified_p__Bacillota	315.345	14.5281	0.00626968	NA
Bacterial secretion system	ZLW	g__Methanobrevibacter	265.018	12.2095	0.00626968	NA
Bacterial secretion system	ZLW	g__Clostridium	211.884	9.76157	0.00626968	FC_Expansion
Bacterial secretion system	ZLW	g__Anaerorhabdus	145.857	6.71969	0.00626968	NA
Bacterial secretion system	ZLW	g__Ruthenibacterium	115.906	5.33986	0.00626968	NA
Bacterial secretion system	ZLW	g__Kineothrix	105.363	4.85411	0.00626968	NA
Bacterial secretion system	ZLW	g__Anaerotruncus	96.2892	4.43608	0.00626968	NA
Bacterial secretion system	ZLW	g__Mucispirillum	95.0521	4.37909	0.00626968	NA
Biotin metabolism	HLW	g__Clostridium	481.715	26.1623	0.0102681	FC_Expansion
Biotin metabolism	HLW	g__Breznakia	471.59	25.6124	0.0102681	FC_Expansion
Biotin metabolism	HLW	g__Desulfovibrio	181.104	9.83588	0.0102681	FC_Expansion
Biotin metabolism	HLW	g__Thomasclavelia	179.326	9.73933	0.0102681	NA
Biotin metabolism	HLW	g__Bacteroides	138.312	7.51183	0.0102681	FC_Expansion
Biotin metabolism	HLW	g__Bilophila	88.7753	4.82145	0.0102681	NA
Biotin metabolism	HLW	g__Vibrio	87.9499	4.77662	0.0102681	FC_Expansion
Biotin metabolism	HLW	g__Bradyrhizobium	72.1684	3.91952	0.0102681	NA
Biotin metabolism	HLW	g__Mycobacterium	71.8374	3.90154	0.0102681	FC_Expansion
Biotin metabolism	HLW	g__Methyloceanibacter	68.4793	3.71916	0.0102681	FC_Expansion
Biotin metabolism	ZLW	g__Clostridium	232.552	19.9692	0.0102681	FC_Expansion
Biotin metabolism	ZLW	g__Desulfovibrio	220.852	18.9645	0.0102681	FC_Expansion
Biotin metabolism	ZLW	g__Anaerorhabdus	145.468	12.4913	0.0102681	NA
Biotin metabolism	ZLW	g__Bacteroides	101.837	8.74471	0.0102681	FC_Expansion
Biotin metabolism	ZLW	g__Bilophila	98.0939	8.42329	0.0102681	NA
Biotin metabolism	ZLW	g__Thomasclavelia	81.677	7.01358	0.0102681	NA
Biotin metabolism	ZLW	g__Angelakisella	75.0205	6.44199	0.0102681	NA
Biotin metabolism	ZLW	g__Candidatus_Methanorudis	72.7525	6.24723	0.0102681	NA
Biotin metabolism	ZLW	g__Lachnoclostridium	70.8734	6.08588	0.0102681	NA
Biotin metabolism	ZLW	g__Kineothrix	65.4286	5.61834	0.0102681	NA
DNA replication	HLW	g__unclassified_c__Caudoviricetes	1497.95	33.8937	0.00241868	FC_Expansion
DNA replication	HLW	g__Clostridium	864.295	19.5562	0.00241868	FC_Expansion
DNA replication	HLW	g__Breznakia	714.721	16.1718	0.00241868	FC_Expansion
DNA replication	HLW	g__Anaerorhabdus	280.883	6.35548	0.00241868	NA
DNA replication	HLW	g__Desulfovibrio	241.113	5.45561	0.00241868	FC_Expansion
DNA replication	HLW	g__Erysipelothrix	231.969	5.24871	0.00241868	FC_Expansion
DNA replication	HLW	g__Bilophila	161.648	3.65757	0.00241868	NA
DNA replication	HLW	g__Bacteroides	149.187	3.37562	0.00241868	FC_Expansion
DNA replication	HLW	g__unclassified_f__Nitrososphaeraceae	145.776	3.29843	0.00241868	NA
DNA replication	HLW	g__Christensenella	132.002	2.98678	0.00241868	NA
DNA replication	ZLW	g__unclassified_p__Bacillota	749.857	22.8991	0.00241868	NA
DNA replication	ZLW	g__Methanobrevibacter	523.33	15.9814	0.00241868	NA
DNA replication	ZLW	g__Hafnia	440.715	13.4585	0.00241868	NA
DNA replication	ZLW	g__Clostridium	296.187	9.04494	0.00241868	FC_Expansion
DNA replication	ZLW	g__Anaerorhabdus	281.011	8.5815	0.00241868	NA
DNA replication	ZLW	g__Kineothrix	244.569	7.46862	0.00241868	NA
DNA replication	ZLW	g__Desulfovibrio	210.572	6.43044	0.00241868	FC_Expansion
DNA replication	ZLW	g__Anaerotignum	186.653	5.69999	0.00241868	NA
DNA replication	ZLW	g__unclassified_f__Erysipelotrichaceae	177.449	5.41893	0.00241868	NA
DNA replication	ZLW	g__Bilophila	164.273	5.01656	0.00241868	NA
Fatty acid biosynthesis	HLW	g__Breznakia	793.443	32.998	0.00193521	FC_Expansion
Fatty acid biosynthesis	HLW	g__Clostridium	450.6	18.7397	0.00193521	FC_Expansion
Fatty acid biosynthesis	HLW	g__Desulfovibrio	211.324	8.78863	0.00193521	FC_Expansion
Fatty acid biosynthesis	HLW	g__Mycobacterium	162.772	6.76939	0.00193521	FC_Expansion
Fatty acid biosynthesis	HLW	g__Christensenella	151.095	6.28378	0.00193521	NA
Fatty acid biosynthesis	HLW	g__Vibrio	136.794	5.68902	0.00193521	FC_Expansion
Fatty acid biosynthesis	HLW	g__Anaerofustis	132.165	5.49654	0.00193521	FC_Expansion
Fatty acid biosynthesis	HLW	g__Anaerorhabdus	125.912	5.23649	0.00193521	NA
Fatty acid biosynthesis	HLW	g__Bradyrhizobium	121.225	5.04156	0.00193521	NA
Fatty acid biosynthesis	HLW	g__Bilophila	119.191	4.95697	0.00193521	NA
Fatty acid biosynthesis	ZLW	g__Anaerorhabdus	361.595	21.7775	0.00193521	NA
Fatty acid biosynthesis	ZLW	g__Clostridium	351.061	21.1431	0.00193521	FC_Expansion
Fatty acid biosynthesis	ZLW	g__Desulfovibrio	175.931	10.5956	0.00193521	FC_Expansion
Fatty acid biosynthesis	ZLW	g__Longicatena	128.292	7.72655	0.00193521	NA
Fatty acid biosynthesis	ZLW	g__Lachnoclostridium	123.614	7.44483	0.00193521	NA
Fatty acid biosynthesis	ZLW	g__Kineothrix	118.802	7.15497	0.00193521	NA
Fatty acid biosynthesis	ZLW	g__Thomasclavelia	117.887	7.09989	0.00193521	NA
Fatty acid biosynthesis	ZLW	g__Hydrogenoanaerobacterium	96.3105	5.80041	0.00193521	NA
Fatty acid biosynthesis	ZLW	g__Bilophila	94.4361	5.68753	0.00193521	NA
Fatty acid biosynthesis	ZLW	g__Bacteroides	92.4782	5.56961	0.00193521	FC_Expansion
Fatty acid metabolism	HLW	g__Breznakia	793.443	27.1828	0.0112983	FC_Expansion
Fatty acid metabolism	HLW	g__Clostridium	461.759	15.8195	0.0112983	FC_Expansion
Fatty acid metabolism	HLW	g__Mycobacterium	374.082	12.8158	0.0112983	FC_Expansion
Fatty acid metabolism	HLW	g__Mycolicibacterium	255.224	8.7438	0.0112983	FC_Expansion
Fatty acid metabolism	HLW	g__Bradyrhizobium	227.573	7.79647	0.0112983	NA
Fatty acid metabolism	HLW	g__Desulfovibrio	217.749	7.45992	0.0112983	FC_Expansion
Fatty acid metabolism	HLW	g__Vibrio	181.441	6.21604	0.0112983	FC_Expansion
Fatty acid metabolism	HLW	g__Christensenella	149.57	5.12416	0.0112983	NA
Fatty acid metabolism	HLW	g__Anaerofustis	132.165	4.52789	0.0112983	FC_Expansion
Fatty acid metabolism	HLW	g__Anaerorhabdus	125.912	4.31367	0.0112983	NA
Fatty acid metabolism	ZLW	g__Clostridium	380.765	21.0821	0.0112983	FC_Expansion
Fatty acid metabolism	ZLW	g__Anaerorhabdus	361.595	20.0207	0.0112983	NA
Fatty acid metabolism	ZLW	g__Desulfovibrio	186.754	10.3401	0.0112983	FC_Expansion
Fatty acid metabolism	ZLW	g__Nocardioides	170.894	9.46204	0.0112983	NA
Fatty acid metabolism	ZLW	g__Lachnoclostridium	143.05	7.92035	0.0112983	NA
Fatty acid metabolism	ZLW	g__Longicatena	133.892	7.4133	0.0112983	NA
Fatty acid metabolism	ZLW	g__Kineothrix	121.493	6.72682	0.0112983	NA
Fatty acid metabolism	ZLW	g__Thomasclavelia	117.887	6.52715	0.0112983	NA
Fatty acid metabolism	ZLW	g__Hydrogenoanaerobacterium	96.3105	5.3325	0.0112983	NA
Fatty acid metabolism	ZLW	g__Bilophila	93.4628	5.17483	0.0112983	NA
Glycosaminoglycan biosynthesis - chondroitin sulfate / dermatan sulfate	HLW	g__Pedobacter	13.5714	29.3715	0.0026998	FC_Expansion
Glycosaminoglycan biosynthesis - chondroitin sulfate / dermatan sulfate	HLW	g__Bacteroides	9.553	20.6747	0.0026998	FC_Expansion
Glycosaminoglycan biosynthesis - chondroitin sulfate / dermatan sulfate	HLW	g__Clostridium	4.35143	9.41743	0.0026998	FC_Expansion
Glycosaminoglycan biosynthesis - chondroitin sulfate / dermatan sulfate	HLW	g__Vibrio	4.24058	9.17753	0.0026998	FC_Expansion
Glycosaminoglycan biosynthesis - chondroitin sulfate / dermatan sulfate	HLW	g__Parabacteroides	3.36522	7.28306	0.0026998	NA
Glycosaminoglycan biosynthesis - chondroitin sulfate / dermatan sulfate	HLW	g__Halalkalibacter	2.932	6.34548	0.0026998	NA
Glycosaminoglycan biosynthesis - chondroitin sulfate / dermatan sulfate	HLW	g__Nitratidesulfovibrio	2.67896	5.79785	0.0026998	FC_Expansion
Glycosaminoglycan biosynthesis - chondroitin sulfate / dermatan sulfate	HLW	g__Desulfovibrio	2.40301	5.20063	0.0026998	FC_Expansion
Glycosaminoglycan biosynthesis - chondroitin sulfate / dermatan sulfate	HLW	g__Streptococcus	2.37797	5.14644	0.0026998	NA
Glycosaminoglycan biosynthesis - chondroitin sulfate / dermatan sulfate	HLW	g__Acutalibacter	0.732525	1.58534	0.0026998	NA
Glycosaminoglycan biosynthesis - chondroitin sulfate / dermatan sulfate	ZLW	g__Bacteroides	5.35803	32.1906	0.0026998	FC_Expansion
Glycosaminoglycan biosynthesis - chondroitin sulfate / dermatan sulfate	ZLW	g__Parabacteroides	2.61525	15.7122	0.0026998	NA
Glycosaminoglycan biosynthesis - chondroitin sulfate / dermatan sulfate	ZLW	g__Halalkalibacter	1.93234	11.6094	0.0026998	NA
Glycosaminoglycan biosynthesis - chondroitin sulfate / dermatan sulfate	ZLW	g__Nocardioides	1.48509	8.92233	0.0026998	NA
Glycosaminoglycan biosynthesis - chondroitin sulfate / dermatan sulfate	ZLW	g__Olivibacter	1.19807	7.19791	0.0026998	NA
Glycosaminoglycan biosynthesis - chondroitin sulfate / dermatan sulfate	ZLW	g__Ruminococcus	1.16454	6.99648	0.0026998	NA
Glycosaminoglycan biosynthesis - chondroitin sulfate / dermatan sulfate	ZLW	g__Cylindrospermum	0.965654	5.80158	0.0026998	NA
Glycosaminoglycan biosynthesis - chondroitin sulfate / dermatan sulfate	ZLW	g__Lactococcus	0.796443	4.78497	0.0026998	NA
Glycosaminoglycan biosynthesis - chondroitin sulfate / dermatan sulfate	ZLW	g__Paenibacillus	0.635134	3.81584	0.0026998	NA
Glycosaminoglycan biosynthesis - chondroitin sulfate / dermatan sulfate	ZLW	g__Microlunatus	0.494123	2.96865	0.0026998	NA
Glycosaminoglycan degradation	HLW	g__Thomasclavelia	176.434	21.3347	0.0357288	NA
Glycosaminoglycan degradation	HLW	g__Bacteroides	174.649	21.1189	0.0357288	FC_Expansion
Glycosaminoglycan degradation	HLW	g__Clostridium	115.112	13.9195	0.0357288	FC_Expansion
Glycosaminoglycan degradation	HLW	g__Breznakia	101.413	12.2631	0.0357288	FC_Expansion
Glycosaminoglycan degradation	HLW	g__Merdibacter	54.2962	6.5656	0.0357288	FC_Expansion
Glycosaminoglycan degradation	HLW	g__Bifidobacterium	46.0176	5.56454	0.0357288	FC_Expansion
Glycosaminoglycan degradation	HLW	g__Collinsella	45.9456	5.55583	0.0357288	FC_Expansion
Glycosaminoglycan degradation	HLW	g__Parabacteroides	41.8912	5.06556	0.0357288	NA
Glycosaminoglycan degradation	HLW	g__Rikenella	37.4207	4.52499	0.0357288	FC_Expansion
Glycosaminoglycan degradation	HLW	g__Mucinivorans	33.801	4.08728	0.0357288	FC_Expansion
Glycosaminoglycan degradation	ZLW	g__Bacteroides	94.2952	21.5645	0.0357288	FC_Expansion
Glycosaminoglycan degradation	ZLW	g__Clostridium	79.6219	18.2089	0.0357288	FC_Expansion
Glycosaminoglycan degradation	ZLW	g__Akkermansia	72.2099	16.5138	0.0357288	NA
Glycosaminoglycan degradation	ZLW	g__Parabacteroides	49.8524	11.4008	0.0357288	NA
Glycosaminoglycan degradation	ZLW	g__Thomasclavelia	45.1754	10.3312	0.0357288	NA
Glycosaminoglycan degradation	ZLW	g__Hungatella	24.4904	5.60075	0.0357288	NA
Glycosaminoglycan degradation	ZLW	g__Ruthenibacterium	19.3356	4.42189	0.0357288	NA
Glycosaminoglycan degradation	ZLW	g__Longicatena	18.176	4.15669	0.0357288	NA
Glycosaminoglycan degradation	ZLW	g__Lachnoclostridium	17.1034	3.9114	0.0357288	NA
Glycosaminoglycan degradation	ZLW	g__Faecalibacillus	17.0098	3.89	0.0357288	NA
Homologous recombination	HLW	g__unclassified_c__Caudoviricetes	1154.22	23.6433	0.000760826	FC_Expansion
Homologous recombination	HLW	g__Breznakia	1108.43	22.7054	0.000760826	FC_Expansion
Homologous recombination	HLW	g__Clostridium	1043.49	21.3751	0.000760826	FC_Expansion
Homologous recombination	HLW	g__Anaerorhabdus	351.283	7.19576	0.000760826	NA
Homologous recombination	HLW	g__Desulfovibrio	278.745	5.70988	0.000760826	FC_Expansion
Homologous recombination	HLW	g__Erysipelothrix	232.637	4.76539	0.000760826	FC_Expansion
Homologous recombination	HLW	g__Bacteroides	192.305	3.93921	0.000760826	FC_Expansion
Homologous recombination	HLW	g__Christensenella	189.061	3.87276	0.000760826	NA
Homologous recombination	HLW	g__Bilophila	172.502	3.53356	0.000760826	NA
Homologous recombination	HLW	g__Vibrio	159.127	3.25959	0.000760826	FC_Expansion
Homologous recombination	ZLW	g__unclassified_p__Bacillota	1302.71	35.4809	0.000760826	NA
Homologous recombination	ZLW	g__Clostridium	425.803	11.5972	0.000760826	FC_Expansion
Homologous recombination	ZLW	g__Anaerorhabdus	362.768	9.8804	0.000760826	NA
Homologous recombination	ZLW	g__Kineothrix	326.259	8.88604	0.000760826	NA
Homologous recombination	ZLW	g__Hafnia	224.132	6.1045	0.000760826	NA
Homologous recombination	ZLW	g__Ruthenibacterium	219.76	5.98542	0.000760826	NA
Homologous recombination	ZLW	g__Desulfovibrio	218.204	5.94303	0.000760826	FC_Expansion
Homologous recombination	ZLW	g__Lachnoclostridium	207.839	5.66072	0.000760826	NA
Homologous recombination	ZLW	g__unclassified_f__Erysipelotrichaceae	203.852	5.55215	0.000760826	NA
Homologous recombination	ZLW	g__Bilophila	180.262	4.90964	0.000760826	NA
Linoleic acid metabolism	HLW	g__Vibrio	6.70667	18.8937	0.000188962	FC_Expansion
Linoleic acid metabolism	HLW	g__Clostridium	6.17505	17.396	0.000188962	FC_Expansion
Linoleic acid metabolism	HLW	g__Rhodoflexus	5.99117	16.878	0.000188962	FC_Expansion
Linoleic acid metabolism	HLW	g__Photobacterium	5.77218	16.2611	0.000188962	FC_Expansion
Linoleic acid metabolism	HLW	g__Plesiomonas	4.53217	12.7678	0.000188962	NA
Linoleic acid metabolism	HLW	g__Paeniclostridium	1.87829	5.29143	0.000188962	FC_Expansion
Linoleic acid metabolism	HLW	g__Mycobacterium	1.83332	5.16475	0.000188962	FC_Expansion
Linoleic acid metabolism	HLW	g__Desulfovibrio	0.980488	2.76218	0.000188962	FC_Expansion
Linoleic acid metabolism	HLW	g__Microbulbifer	0.850346	2.39556	0.000188962	NA
Linoleic acid metabolism	HLW	g__Blastopirellula	0.777148	2.18934	0.000188962	NA
Linoleic acid metabolism	ZLW	g__Parabacteroides	2.0998	33.2467	0.000188962	NA
Linoleic acid metabolism	ZLW	g__unclassified_f__Nitrososphaeraceae	1.12753	17.8525	0.000188962	NA
Linoleic acid metabolism	ZLW	g__Scandinavium	1.05469	16.6992	0.000188962	NA
Linoleic acid metabolism	ZLW	g__Cylindrospermum	0.563137	8.91629	0.000188962	NA
Linoleic acid metabolism	ZLW	g__Chroococcidiopsis	0.299299	4.73887	0.000188962	NA
Linoleic acid metabolism	ZLW	g__Citrobacter	0.293503	4.64712	0.000188962	NA
Linoleic acid metabolism	ZLW	g__Neocucurbitaria	0.2365	3.74457	0.000188962	NA
Linoleic acid metabolism	ZLW	g__Craterilacuibacter	0.228864	3.62367	0.000188962	NA
Linoleic acid metabolism	ZLW	g__Crenobacter	0.227847	3.60756	0.000188962	NA
Linoleic acid metabolism	ZLW	g__unclassified_p__Candidatus_Rifleibacteriota	0.184646	2.92354	0.000188962	NA
Mismatch repair	HLW	g__Clostridium	1011.49	26.9159	0.00373163	FC_Expansion
Mismatch repair	HLW	g__Breznakia	753.628	20.0542	0.00373163	FC_Expansion
Mismatch repair	HLW	g__unclassified_c__Caudoviricetes	567.562	15.103	0.00373163	FC_Expansion
Mismatch repair	HLW	g__Anaerorhabdus	320.934	8.54013	0.00373163	NA
Mismatch repair	HLW	g__Erysipelothrix	233.369	6.21002	0.00373163	FC_Expansion
Mismatch repair	HLW	g__Desulfovibrio	220.265	5.86131	0.00373163	FC_Expansion
Mismatch repair	HLW	g__Bilophila	190.652	5.07329	0.00373163	NA
Mismatch repair	HLW	g__Bacteroides	180.85	4.81246	0.00373163	FC_Expansion
Mismatch repair	HLW	g__Vibrio	140.523	3.73935	0.00373163	FC_Expansion
Mismatch repair	HLW	g__unclassified_f__Erysipelotrichaceae	138.681	3.69034	0.00373163	NA
Mismatch repair	ZLW	g__unclassified_p__Bacillota	662.557	21.3174	0.00373163	NA
Mismatch repair	ZLW	g__Clostridium	447.743	14.4059	0.00373163	FC_Expansion
Mismatch repair	ZLW	g__Anaerorhabdus	348.107	11.2002	0.00373163	NA
Mismatch repair	ZLW	g__Kineothrix	324.441	10.4387	0.00373163	NA
Mismatch repair	ZLW	g__Methanobrevibacter	322.983	10.3918	0.00373163	NA
Mismatch repair	ZLW	g__Hafnia	224.155	7.21207	0.00373163	NA
Mismatch repair	ZLW	g__unclassified_f__Erysipelotrichaceae	219.414	7.05953	0.00373163	NA
Mismatch repair	ZLW	g__Bilophila	191.659	6.16651	0.00373163	NA
Mismatch repair	ZLW	g__Desulfovibrio	190.165	6.11846	0.00373163	FC_Expansion
Mismatch repair	ZLW	g__Lachnoclostridium	176.832	5.68948	0.00373163	NA
Nucleotide metabolism	HLW	g__Clostridium	1589.13	26.4469	0.0214482	FC_Expansion
Nucleotide metabolism	HLW	g__Breznakia	1285.04	21.3861	0.0214482	FC_Expansion
Nucleotide metabolism	HLW	g__unclassified_c__Caudoviricetes	849.919	14.1447	0.0214482	FC_Expansion
Nucleotide metabolism	HLW	g__Anaerorhabdus	526.319	8.7592	0.0214482	NA
Nucleotide metabolism	HLW	g__Amedibacillus	395.637	6.58433	0.0214482	NA
Nucleotide metabolism	HLW	g__Bilophila	304.117	5.06123	0.0214482	NA
Nucleotide metabolism	HLW	g__Bacteroides	281.975	4.69273	0.0214482	FC_Expansion
Nucleotide metabolism	HLW	g__Desulfovibrio	277.477	4.61788	0.0214482	FC_Expansion
Nucleotide metabolism	HLW	g__Christensenella	250.817	4.1742	0.0214482	NA
Nucleotide metabolism	HLW	g__Alistipes	248.324	4.13271	0.0214482	FC_Expansion
Nucleotide metabolism	ZLW	g__unclassified_p__Bacillota	1530.19	23.3775	0.0214482	NA
Nucleotide metabolism	ZLW	g__Methanobrevibacter	1158.4	17.6974	0.0214482	NA
Nucleotide metabolism	ZLW	g__Clostridium	1135	17.34	0.0214482	FC_Expansion
Nucleotide metabolism	ZLW	g__Anaerorhabdus	734.354	11.2191	0.0214482	NA
Nucleotide metabolism	ZLW	g__Lachnoclostridium	421.398	6.43791	0.0214482	NA
Nucleotide metabolism	ZLW	g__Desulfovibrio	352.195	5.38066	0.0214482	FC_Expansion
Nucleotide metabolism	ZLW	g__Bilophila	344.093	5.25689	0.0214482	NA
Nucleotide metabolism	ZLW	g__Kineothrix	342.895	5.23858	0.0214482	NA
Nucleotide metabolism	ZLW	g__unclassified_f__Erysipelotrichaceae	271.862	4.15337	0.0214482	NA
Nucleotide metabolism	ZLW	g__Anaerotruncus	255.188	3.89864	0.0214482	NA
Phospholipase D signaling pathway	HLW	g__Breznakia	93.9563	40.2072	0.000760826	FC_Expansion
Phospholipase D signaling pathway	HLW	g__Bilophila	23.3962	10.0121	0.000760826	NA
Phospholipase D signaling pathway	HLW	g__Clostridium	22.0982	9.45661	0.000760826	FC_Expansion
Phospholipase D signaling pathway	HLW	g__Solobacterium	16.6388	7.12033	0.000760826	FC_Expansion
Phospholipase D signaling pathway	HLW	g__Vibrio	15.3234	6.55744	0.000760826	FC_Expansion
Phospholipase D signaling pathway	HLW	g__Candidatus_Accumulibacter	15.1971	6.50337	0.000760826	NA
Phospholipase D signaling pathway	HLW	g__Bacteroides	14.4733	6.19364	0.000760826	FC_Expansion
Phospholipase D signaling pathway	HLW	g__Christensenella	12.6223	5.40154	0.000760826	NA
Phospholipase D signaling pathway	HLW	g__Cucumispora	12.1073	5.18115	0.000760826	NA
Phospholipase D signaling pathway	HLW	g__Pseudomonas	7.86719	3.36665	0.000760826	NA
Phospholipase D signaling pathway	ZLW	g__Schistosoma	60.3465	46.4341	0.000760826	NA
Phospholipase D signaling pathway	ZLW	g__Hydrogenoanaerobacterium	16.4555	12.6618	0.000760826	NA
Phospholipase D signaling pathway	ZLW	g__Bilophila	15.8707	12.2118	0.000760826	NA
Phospholipase D signaling pathway	ZLW	g__Desulfovibrio	12.032	9.2581	0.000760826	FC_Expansion
Phospholipase D signaling pathway	ZLW	g__Paludihabitans	8.34871	6.42399	0.000760826	NA
Phospholipase D signaling pathway	ZLW	g__Clostridium	6.26077	4.8174	0.000760826	FC_Expansion
Phospholipase D signaling pathway	ZLW	g__Parabacteroides	2.80502	2.15835	0.000760826	NA
Phospholipase D signaling pathway	ZLW	g__Ligaoa	2.70531	2.08162	0.000760826	NA
Phospholipase D signaling pathway	ZLW	g__Christensenella	2.60473	2.00423	0.000760826	NA
Phospholipase D signaling pathway	ZLW	g__Mycoplasma	2.53241	1.94858	0.000760826	FC_Expansion
Protein export	HLW	g__Breznakia	900.485	37.9003	0.0136377	FC_Expansion
Protein export	HLW	g__Clostridium	434.206	18.2752	0.0136377	FC_Expansion
Protein export	HLW	g__Christensenella	182.994	7.70198	0.0136377	NA
Protein export	HLW	g__Desulfovibrio	169.842	7.14843	0.0136377	FC_Expansion
Protein export	HLW	g__Bacteroides	163.136	6.86619	0.0136377	FC_Expansion
Protein export	HLW	g__Anaerorhabdus	120.737	5.08168	0.0136377	NA
Protein export	HLW	g__Bilophila	112.83	4.74889	0.0136377	NA
Protein export	HLW	g__Longicatena	99.9873	4.20834	0.0136377	NA
Protein export	HLW	g__Amedibacterium	98.9433	4.1644	0.0136377	NA
Protein export	HLW	g__Methyloceanibacter	92.7702	3.90458	0.0136377	FC_Expansion
Protein export	ZLW	g__Methanobrevibacter	440.701	19.3456	0.0136377	NA
Protein export	ZLW	g__unclassified_p__Bacillota	384.991	16.9001	0.0136377	NA
Protein export	ZLW	g__Clostridium	368.498	16.1761	0.0136377	FC_Expansion
Protein export	ZLW	g__Kineothrix	196.367	8.61997	0.0136377	NA
Protein export	ZLW	g__Desulfovibrio	188.633	8.28047	0.0136377	FC_Expansion
Protein export	ZLW	g__Anaerorhabdus	181.953	7.98726	0.0136377	NA
Protein export	ZLW	g__Bilophila	142.085	6.23713	0.0136377	NA
Protein export	ZLW	g__Lachnoclostridium	128.056	5.6213	0.0136377	NA
Protein export	ZLW	g__Ruthenibacterium	124.93	5.4841	0.0136377	NA
Protein export	ZLW	g__Amedibacillus	121.831	5.34806	0.0136377	NA
Pyrimidine metabolism	HLW	g__Clostridium	1327.39	24.4419	0.00693395	FC_Expansion
Pyrimidine metabolism	HLW	g__Breznakia	1057.49	19.4721	0.00693395	FC_Expansion
Pyrimidine metabolism	HLW	g__unclassified_c__Caudoviricetes	840.445	15.4756	0.00693395	FC_Expansion
Pyrimidine metabolism	HLW	g__Anaerorhabdus	575.378	10.5948	0.00693395	NA
Pyrimidine metabolism	HLW	g__Amedibacillus	505.669	9.31116	0.00693395	NA
Pyrimidine metabolism	HLW	g__Eubacterium	234.654	4.32082	0.00693395	NA
Pyrimidine metabolism	HLW	g__Bacteroides	229.473	4.22542	0.00693395	FC_Expansion
Pyrimidine metabolism	HLW	g__Christensenella	226.834	4.17682	0.00693395	NA
Pyrimidine metabolism	HLW	g__Alistipes	217.23	3.99999	0.00693395	FC_Expansion
Pyrimidine metabolism	HLW	g__Bilophila	216.222	3.98143	0.00693395	NA
Pyrimidine metabolism	ZLW	g__Methanobrevibacter	1105.7	21.3052	0.00693395	NA
Pyrimidine metabolism	ZLW	g__unclassified_p__Bacillota	795.839	15.3347	0.00693395	NA
Pyrimidine metabolism	ZLW	g__Clostridium	793.659	15.2927	0.00693395	FC_Expansion
Pyrimidine metabolism	ZLW	g__Anaerorhabdus	771.445	14.8647	0.00693395	NA
Pyrimidine metabolism	ZLW	g__Lachnoclostridium	370.239	7.13398	0.00693395	NA
Pyrimidine metabolism	ZLW	g__Kineothrix	304.798	5.87303	0.00693395	NA
Pyrimidine metabolism	ZLW	g__Bilophila	270.906	5.21998	0.00693395	NA
Pyrimidine metabolism	ZLW	g__Ruthenibacterium	267.329	5.15106	0.00693395	NA
Pyrimidine metabolism	ZLW	g__Desulfovibrio	266.985	5.14442	0.00693395	FC_Expansion
Pyrimidine metabolism	ZLW	g__unclassified_f__Erysipelotrichaceae	242.896	4.68027	0.00693395	NA
RNA degradation	HLW	g__Breznakia	646.058	33.7437	0.0026998	FC_Expansion
RNA degradation	HLW	g__Clostridium	361.501	18.8812	0.0026998	FC_Expansion
RNA degradation	HLW	g__Anaerorhabdus	157.96	8.25028	0.0026998	NA
RNA degradation	HLW	g__Methyloceanibacter	133.933	6.99535	0.0026998	FC_Expansion
RNA degradation	HLW	g__Bacteroides	117.421	6.13292	0.0026998	FC_Expansion
RNA degradation	HLW	g__Desulfovibrio	115.146	6.01408	0.0026998	FC_Expansion
RNA degradation	HLW	g__Mycobacterium	105.258	5.49762	0.0026998	FC_Expansion
RNA degradation	HLW	g__Vibrio	95.2992	4.97749	0.0026998	FC_Expansion
RNA degradation	HLW	g__Christensenella	91.4012	4.7739	0.0026998	NA
RNA degradation	HLW	g__Bilophila	90.6258	4.7334	0.0026998	NA
RNA degradation	ZLW	g__unclassified_p__Bacillota	445.021	25.7676	0.0026998	NA
RNA degradation	ZLW	g__Methanobrevibacter	272.773	15.7941	0.0026998	NA
RNA degradation	ZLW	g__Anaerorhabdus	222.921	12.9076	0.0026998	NA
RNA degradation	ZLW	g__Clostridium	222.669	12.893	0.0026998	FC_Expansion
RNA degradation	ZLW	g__Kineothrix	115.643	6.69597	0.0026998	NA
RNA degradation	ZLW	g__Desulfovibrio	112.588	6.51904	0.0026998	FC_Expansion
RNA degradation	ZLW	g__unclassified_f__Erysipelotrichaceae	111.306	6.44481	0.0026998	NA
RNA degradation	ZLW	g__Nocardioides	78.6684	4.55506	0.0026998	NA
RNA degradation	ZLW	g__Lachnoclostridium	72.786	4.21445	0.0026998	NA
RNA degradation	ZLW	g__Ruthenibacterium	72.6825	4.20846	0.0026998	NA
alpha-Linolenic acid metabolism	HLW	g__Mycobacterium	29.6575	27.4642	0.025527	FC_Expansion
alpha-Linolenic acid metabolism	HLW	g__Mycolicibacterium	17.4488	16.1584	0.025527	FC_Expansion
alpha-Linolenic acid metabolism	HLW	g__Photobacterium	11.1542	10.3293	0.025527	FC_Expansion
alpha-Linolenic acid metabolism	HLW	g__Vibrio	10.9412	10.1321	0.025527	FC_Expansion
alpha-Linolenic acid metabolism	HLW	g__Plesiomonas	7.97415	7.38443	0.025527	NA
alpha-Linolenic acid metabolism	HLW	g__Candidatus_Acidiferrum	7.31587	6.77483	0.025527	FC_Expansion
alpha-Linolenic acid metabolism	HLW	g__Nocardioides	6.19421	5.73612	0.025527	NA
alpha-Linolenic acid metabolism	HLW	g__Clostridium	6.17505	5.71838	0.025527	FC_Expansion
alpha-Linolenic acid metabolism	HLW	g__Rhodoflexus	5.99117	5.5481	0.025527	FC_Expansion
alpha-Linolenic acid metabolism	HLW	g__Microbacterium	5.13392	4.75425	0.025527	NA
alpha-Linolenic acid metabolism	ZLW	g__Nocardioides	9.73365	26.7249	0.025527	NA
alpha-Linolenic acid metabolism	ZLW	g__Microbacterium	5.44986	14.9633	0.025527	NA
alpha-Linolenic acid metabolism	ZLW	g__Muribaculum	5.04361	13.8479	0.025527	NA
alpha-Linolenic acid metabolism	ZLW	g__Agromyces	4.14536	11.3816	0.025527	NA
alpha-Linolenic acid metabolism	ZLW	g__Flavonifractor	3.45407	9.48358	0.025527	NA
alpha-Linolenic acid metabolism	ZLW	g__Parabacteroides	2.0998	5.76527	0.025527	NA
alpha-Linolenic acid metabolism	ZLW	g__Desulfatitalea	2.05194	5.63387	0.025527	NA
alpha-Linolenic acid metabolism	ZLW	g__Citrobacter	2.0303	5.57443	0.025527	NA
alpha-Linolenic acid metabolism	ZLW	g__Lawsonibacter	1.2391	3.40209	0.025527	NA
alpha-Linolenic acid metabolism	ZLW	g__Bacteroides	1.17389	3.22307	0.025527	FC_Expansion
