# Supplementary material
Source: Research Square preprint supplement (doi:10.21203/rs.3.rs-9409886/v1)
Supplement: Supplementary file 5 [file afa3491c5aa677b654d2c268.xlsx]

## Sheet: total-4-diff-kegg-level3
KEGG Pathway Level3	Kegg	FC-Mean(%)	FC-Sd(%)	FM-Mean(%)	FM-Sd(%)	Pvalue	Fold Change	Corrected pvalue	Lower ci	Upper ci	Effectsize
Mismatch repair	03430	0.74467	0.18222	0.61522	0.083	0.00305	1.21041	0.02528	0.04877	0.2149	0.1295
DNA replication	03030	0.76749	0.33735	0.55988	0.11642	0.00185	1.37081	0.02018	0.06984	0.363	0.2076
Propanoate metabolism	00640	0.49831	0.08623	0.42504	0.0321	0.0021	1.17238	0.02018	0.03545	0.1132	0.07326
Biotin metabolism	00780	0.32442	0.056	0.25759	0.07721	0.00779	1.25943	0.04411	0.02604	0.1247	0.06684
Polyketide sugar unit biosynthesis	00523	0.20043	0.03894	0.17063	0.02779	0.00696	1.17465	0.04085	0.00698	0.05037	0.0298
Thiamine metabolism	00730	0.37458	0.0461	0.33016	0.02513	0.00438	1.13455	0.02925	0.02028	0.06878	0.04439
Aminoacyl-tRNA biosynthesis	00970	0.89649	0.08331	0.79879	0.13573	0.00389	1.1223	0.02789	-0.00422	0.1723	0.0977
Cutin suberine and wax biosynthesis	00073	0.00136	0.00176	0.00028	0.00029	0.00389	4.85931	0.02789	0.00045	0.00183	0.00108
Fatty acid biosynthesis	00061	0.43471	0.06421	0.34827	0.11659	0.00305	1.2482	0.02528	0.02545	0.1721	0.08642
Bacterial secretion system	03070	0.54514	0.12411	0.39896	0.08008	0.0027	1.36639	0.02446	0.07404	0.2146	0.1462
Nucleotide metabolism	00520	1.34352	0.23208	1.17664	0.10209	0.0021	1.14183	0.02018	0.06984	0.2925	0.1669
Linoleic acid metabolism	00591	0.00305	0.00242	0.00056	0.00037	0.00036	5.46834	0.00705	0.00161	0.00353	0.0025
Arachidonic acid metabolism	00590	0.0045	0.00381	0.00093	0.00072	0.00017	4.84734	0.00463	0.00219	0.00526	0.00358
Phospholipase D signaling pathway	04072	0.02704	0.01093	0.01329	0.01398	0.00125	2.03365	0.01504	0.00406	0.02199	0.01374
Glycosaminoglycan degradation	00531	0.1201	0.03433	0.077	0.03532	0.00438	1.55974	0.02925	0.01761	0.06967	0.04309
Glycosaminoglycan biosynthesis - chondroitin sulfate / dermatan sulfate	00532	0.00485	0.00468	0.00145	0.0011	0.00344	3.33765	0.02749	0.00178	0.00542	0.0034
Various types of N-glycan biosynthesis	00513	0.06869	0.02201	0.03086	0.01767	0.00015	2.22562	0.00447	0.0248	0.05243	0.03782
Pyrimidine metabolism	00240	1.17937	0.22464	0.97536	0.05451	0.00013	1.20917	0.00447	0.1183	0.3076	0.204
Fatty acid metabolism	01212	0.58704	0.12806	0.39969	0.12651	0.00094	1.46875	0.02364	0.08789	0.3037	0.1873
Mycolic acid biosynthesis	00074	0.08512	0.02401	0.05851	0.01005	0.00485	1.45473	0.04911	0.01239	0.04222	0.02661
Oxidative phosphorylation	00190	0.99121	0.22119	0.71333	0.11177	0.00623	1.38956	0.05817	0.1309	0.4219	0.2779
Pyruvate metabolism	00620	0.951	0.10666	0.84303	0.03625	0.00485	1.12807	0.04911	0.0471	0.1775	0.108
alpha-Linolenic acid metabolism	00592	0.01593	0.01138	0.00405	0.00289	0.00288	3.93519	0.04155	0.00547	0.01883	0.01188
RNA degradation	03018	0.41183	0.05871	0.31721	0.0389	9e-05	1.2983	0.0041	0.06076	0.1284	0.09461
Homologous recombination	03440	0.89168	0.28019	0.62981	0.06472	5e-05	1.41581	0.00265	0.1701	0.3991	0.2619
Protein export	03060	0.49401	0.03814	0.40436	0.02424	4e-05	1.22172	0.00265	0.06927	0.1106	0.08964
Antifolate resistance	01523	0.11949	0.02147	0.08033	0.00929	3e-05	1.48755	0.00265	0.03007	0.04905	0.03917
