# Supplementary material
Source: Research Square preprint supplement (doi:10.21203/rs.3.rs-9409886/v1)
Supplement: Supplementary file 6 [file b1b6b8cdf9b554d7eb7df518.xlsx]

## Sheet: supplementary Table 7 trans-FC-
Name	out-Mean(%)	out-Sd(%)	sys-Mean(%)	sys-Sd(%)	Pvalue	Fold Change	Corrected pvalue	Lower ci	Upper ci	Effectsize
Microbial metabolism in diverse environments	4.19861	0.64351	1.64909	1.41861	0.001	2.54602	0.00322	1.418	3.538	2.55
Biosynthesis of amino acids	2.78999	0.40478	1.18944	0.97527	0.00063	2.34563	0.00231	0.8582	2.265	1.6
ABC transporters	2.32564	0.39479	0.94644	0.87724	0.00476	2.45724	0.0083	0.6677	1.936	1.379
Carbon metabolism	2.30084	0.2409	0.9158	0.78274	0.00033	2.51238	0.00194	0.7772	1.926	1.385
Amino sugar and nucleotide sugar metabolism	1.24877	0.29156	0.60416	0.47091	0.00181	2.06694	0.00449	0.2843	0.9906	0.6447
Biosynthesis of nucleotide sugars	1.10423	0.26016	0.50981	0.43247	0.00476	2.16597	0.0083	0.2725	0.9162	0.5943
Homologous recombination	0.83883	0.29744	0.61812	0.11489	0.01302	1.35708	0.01848	0.09406	0.3651	0.2207
Glycolysis / Gluconeogenesis	0.98396	0.10586	0.44627	0.35818	0.00209	2.20484	0.00478	0.2569	0.7825	0.5376
Pyruvate metabolism	0.91051	0.11546	0.37769	0.35007	0.00703	2.41069	0.01116	0.2435	0.7727	0.5328
Aminoacyl-tRNA biosynthesis	0.86136	0.10085	0.38427	0.34486	0.00543	2.24154	0.00917	0.2118	0.7229	0.4771
Starch and sucrose metabolism	0.7914	0.21392	0.44692	0.33664	0.02881	1.77078	0.03647	0.08223	0.5889	0.3445
Cysteine and methionine metabolism	0.86207	0.12691	0.36391	0.29999	0.00074	2.36892	0.00252	0.2697	0.6984	0.4982
Oxidative phosphorylation	0.88105	0.20895	0.33574	0.29815	0.00209	2.62422	0.00478	0.3059	0.77	0.5454
Pentose phosphate pathway	0.74916	0.15441	0.35104	0.27002	0.00241	2.13414	0.00526	0.1821	0.6023	0.3981
Peptidoglycan biosynthesis	0.7054	0.19504	0.31214	0.26202	0.00417	2.25989	0.00754	0.1793	0.5893	0.3933
2-Oxocarboxylic acid metabolism	0.72143	0.14376	0.26645	0.23798	0.00046	2.70761	0.00197	0.2754	0.626	0.455
Galactose metabolism	0.60309	0.17927	0.33068	0.24557	0.01023	1.8238	0.01532	0.07779	0.463	0.2724
Glycine serine and threonine metabolism	0.64551	0.08498	0.25489	0.20474	0.00033	2.53252	0.00194	0.2321	0.5375	0.3906
Alanine aspartate and glutamate metabolism	0.60072	0.09872	0.25197	0.21967	0.00086	2.38412	0.00284	0.178	0.5035	0.3488
Glyoxylate and dicarboxylate metabolism	0.59366	0.23144	0.20414	0.17784	0.00074	2.90811	0.00252	0.2301	0.5412	0.3895
Bacterial secretion system	0.52133	0.14414	0.23513	0.21316	0.00543	2.21717	0.00917	0.1106	0.4276	0.2862
Propanoate metabolism	0.52507	0.106	0.21061	0.19007	0.00417	2.49307	0.00754	0.161	0.4415	0.3145
Fatty acid metabolism	0.53708	0.12817	0.19749	0.18779	0.00241	2.71944	0.00526	0.1723	0.4715	0.3396
Butanoate metabolism	0.53297	0.13564	0.20113	0.19756	0.00364	2.64989	0.00695	0.1693	0.4725	0.3318
Flagellar assembly	0.52992	0.23953	0.191	0.20536	0.00417	2.77449	0.00754	0.158	0.5018	0.3389
Carbon fixation by Calvin cycle	0.48639	0.08337	0.22455	0.18189	0.00543	2.16609	0.00917	0.1208	0.39	0.2618
Glycerophospholipid metabolism	0.46849	0.08863	0.21196	0.18361	0.00476	2.21031	0.0083	0.1131	0.3832	0.2565
Protein export	0.46766	0.07807	0.20484	0.17126	0.00117	2.28307	0.00342	0.1341	0.3788	0.2628
Fatty acid biosynthesis	0.43723	0.05983	0.18748	0.17489	0.00703	2.3321	0.01116	0.1173	0.3688	0.2498
Lysine biosynthesis	0.42542	0.08885	0.18987	0.1657	0.00618	2.24057	0.01015	0.09549	0.3666	0.2355
Nicotinate and nicotinamide metabolism	0.40086	0.04225	0.19993	0.1713	0.01302	2.00499	0.01848	0.06475	0.3147	0.2009
Arginine biosynthesis	0.4165	0.07155	0.17909	0.15451	0.00117	2.32563	0.00342	0.1172	0.3457	0.2374
Biofilm formation - Escherichia coli	0.4124	0.09988	0.17933	0.14353	0.00181	2.29973	0.00449	0.12	0.3379	0.2331
Pantothenate and CoA biosynthesis	0.40897	0.06619	0.17983	0.15405	0.00157	2.27416	0.00414	0.114	0.3386	0.2291
Citrate cycle (TCA cycle)	0.41963	0.12669	0.14652	0.12887	0.00033	2.86406	0.00194	0.1621	0.3748	0.2731
Pentose and glucuronate interconversions	0.34832	0.10642	0.19121	0.16861	0.02315	1.82162	0.03034	0.01353	0.2774	0.1571
Terpenoid backbone biosynthesis	0.36174	0.04983	0.16637	0.14652	0.00798	2.17432	0.01238	0.08077	0.2987	0.1954
Thiamine metabolism	0.34471	0.0868	0.18003	0.16129	0.03206	1.91475	0.04016	0.02764	0.2809	0.1647
Teichoic acid biosynthesis	0.36397	0.1433	0.15855	0.11164	0.00417	2.29565	0.00754	0.1029	0.3022	0.2054
Cationic antimicrobial peptide (CAMP) resistance	0.33514	0.087	0.1666	0.14521	0.00703	2.01158	0.01116	0.0531	0.2804	0.1685
Biotin metabolism	0.32089	0.05588	0.14136	0.13065	0.00364	2.26996	0.00695	0.08001	0.2711	0.1795
Sulfur metabolism	0.34118	0.09308	0.12009	0.11054	0.00086	2.84115	0.00284	0.1276	0.2994	0.2211
D-Amino acid metabolism	0.25899	0.05997	0.12706	0.12789	0.0207	2.0384	0.02766	0.01937	0.2179	0.1319
Valine leucine and isoleucine biosynthesis	0.27823	0.0652	0.09253	0.08141	0.00033	3.00675	0.00194	0.124	0.2443	0.1857
Nitrogen metabolism	0.27653	0.08834	0.09349	0.08021	0.00046	2.95797	0.00197	0.1136	0.2444	0.183
Selenocompound metabolism	0.25254	0.03711	0.10756	0.09734	0.00417	2.34791	0.00754	0.07064	0.2126	0.145
Exopolysaccharide biosynthesis	0.19868	0.06605	0.09408	0.07621	0.00277	2.11191	0.00579	0.04214	0.1674	0.1046
Phenylalanine metabolism	0.2195	0.06661	0.07217	0.06142	0.00046	3.04128	0.00197	0.09457	0.1956	0.1473
Benzoate degradation	0.21063	0.12197	0.06661	0.06326	0.00241	3.16194	0.00526	0.08113	0.206	0.144
Degradation of aromatic compounds	0.2004	0.10517	0.06151	0.04918	0.00054	3.25813	0.00213	0.08822	0.1934	0.1389
Polyketide sugar unit biosynthesis	0.17692	0.05726	0.07903	0.0672	0.00618	2.23854	0.01015	0.04424	0.1477	0.09787
Tyrosine metabolism	0.16245	0.05441	0.06134	0.05665	0.00417	2.64817	0.00754	0.05416	0.1447	0.1011
C5-Branched dibasic acid metabolism	0.16746	0.05789	0.05403	0.05028	0.00054	3.09911	0.00213	0.06888	0.1529	0.1134
Glutathione metabolism	0.16723	0.1024	0.05345	0.04516	0.00157	3.12849	0.00414	0.06487	0.1616	0.1138
Taurine and hypotaurine metabolism	0.14368	0.01862	0.05584	0.0489	0.00074	2.5732	0.00252	0.04726	0.1212	0.08784
Tryptophan metabolism	0.15925	0.11005	0.03842	0.03112	0.00033	4.14477	0.00194	0.07864	0.1682	0.1208
Ubiquinone and other terpenoid-quinone biosynthesis	0.13719	0.05073	0.05947	0.05039	0.00417	2.30682	0.00754	0.03596	0.1191	0.07773
Lipoic acid metabolism	0.14622	0.08824	0.04659	0.04007	0.00117	3.13844	0.00342	0.0595	0.1448	0.09962
Cyanoamino acid metabolism	0.11063	0.01968	0.06076	0.0498	0.02315	1.82071	0.03034	0.01215	0.08703	0.04987
beta-Alanine metabolism	0.11759	0.06445	0.03906	0.03332	0.001	3.0103	0.00322	0.04913	0.1105	0.07853
Mycolic acid biosynthesis	0.07443	0.02491	0.02577	0.02507	0.00241	2.88795	0.00526	0.028	0.06715	0.04866
Cobalamin transport and metabolism	0.06558	0.02805	0.03042	0.02854	0.01848	2.15589	0.02504	0.01168	0.05818	0.03516
Various types of N-glycan biosynthesis	0.05949	0.02312	0.03388	0.03291	0.0936	1.75569	0.1098	-0.0003	0.04908	0.0256
Metabolism of xenobiotics by cytochrome P450	0.05004	0.04587	0.00837	0.00511	0.0002	5.97783	0.00194	0.02552	0.05997	0.04166
Mineral absorption	0.03992	0.01416	0.01517	0.01502	0.00703	2.6323	0.01116	0.01284	0.03587	0.02476
Biosynthesis of unsaturated fatty acids	0.04695	0.02736	0.00806	0.0058	0.00015	5.82359	0.00194	0.02896	0.04891	0.03889
Phospholipase D signaling pathway	0.02722	0.0164	0.00892	0.00845	0.00318	3.05006	0.00637	0.00958	0.02758	0.01829
Ether lipid metabolism	0.01299	0.0076	0.00426	0.00343	0.00364	3.04984	0.00695	0.00516	0.01253	0.00873
alpha-Linolenic acid metabolism	0.01151	0.00993	0.00157	0.00126	0.00063	7.3327	0.00231	0.00663	0.01393	0.00994
Arachidonic acid metabolism	0.00634	0.00819	0.00127	0.00089	0.00318	5.006	0.00637	0.0027	0.00846	0.00507
Linoleic acid metabolism	0.00353	0.00368	0.0012	0.0009	0.02585	2.9526	0.03333	0.00103	0.00374	0.00233
Cutin suberine and wax biosynthesis	0.00202	0.00236	0.00031	0.00059	0.00277	6.5433	0.00579	0.00081	0.00271	0.00171
