# Supplementary material
Source: Research Square preprint supplement (doi:10.21203/rs.3.rs-9409886/v1)
Supplement: Supplementary file 7 [file be0d67e62c28d08fa8440435.xlsx]

## Sheet: gut_ontology_Trinotate.c
ID	Description	function	GeneRatio	BgRatio	pvalue	p.adjust	qvalue	gene	Count
GO:1902229	regulation of intrinsic apoptotic signaling pathway in response to DNA damage	DNA	15/2882	113/62406	0.000225566	0.00860734	0.00714014	HNRPK_CHICK,UBE2B_RAT,BID_CHICK,SNAI2_XENLA,NEMF_HUMAN,CD44_CANLF,STEA3_HUMAN,SKP1_RAT,KDM1A_MOUSE,SFRP2_CANLF,CD44_CANLF,ACKR3_MOUSE,STEA3_HUMAN,FBH1_HUMAN,Nan,	15
GO:0008238	exopeptidase activity	Metabolic processes	21/2882	236/62406	0.0033134	0.048713	0.0404094	PSA_MOUSE,ASGL1_XENLA,RNPL1_HUMAN,DPP8_HUMAN,MMP14_HUMAN,BLMH_CHICK,CBPZ_CHICK,CBPM_MOUSE,MAP1_XENTR,HGFL_HUMAN,SEPR_BOVIN,Nan,PPGB_BOVIN,DPP4_PIG,LCAP_RAT,CPXM2_HUMAN,DNPEP_BOVIN,CATS_SAIBB,FACE2_HUMAN,CNDP2_MOUSE,PCP_HUMAN,	21
GO:0043395	heparan sulfate proteoglycan binding	Metabolic processes	13/2882	107/62406	0.00133406	0.026762	0.0222002	SMOC1_MOUSE,LRP1_CHICK,A4_PIG,APOE_ALLMI,SLIT1_RAT,Nan,ITAD_MOUSE,PTPRC_HUMAN,SMOC1_MOUSE,BMPER_HUMAN,AGRIN_CHICK,ITA2_HUMAN,LIPL_CHICK,	13
GO:0006029	proteoglycan metabolic process	Metabolic processes	21/2882	194/62406	0.000274959	0.00993501	0.0082415	CHSTC_XENLA,SMC5_XENLA,SMAP1_MOUSE,CHSTB_HUMAN,CSPG4_HUMAN,SULF1_COTCO,HYAL2_BITAR,H6ST1_CHICK,B3GT6_HUMAN,HS3SB_HUMAN,PPARD_HUMAN,CHSTE_HUMAN,SPHM_HUMAN,CSPG2_CHICK,GPC1_XENTR,CAHM6_RAT,ATS7_MOUSE,PGS1_XENLA,CGAT2_MOUSE,SULF1_COTCO,CANT1_HUMAN,	21
GO:0034123	positive regulation of toll-like receptor signaling pathway	Immune response	11/2882	75/62406	0.000640255	0.0173506	0.0143931	TLR3_BOSTR,ENPL_BOVIN,CY24A_BOVIN,CAV1_CHICK,TIRAP_HUMAN,LRCH3_HUMAN,Nan,Nan,UBR3_HUMAN,Nan,HMGB1_RAT,	11
GO:0002711	positive regulation of T cell mediated immunity	Immune response	15/2882	132/62406	0.00118613	0.0252677	0.0209606	MALT1_HUMAN,Nan,IL18R_HUMAN,FZD5_XENLA,HMR1_PONAB,TRAF2_HUMAN,PTPRC_HUMAN,Nan,Nan,HSP70_CHICK,ZA2G_BOVIN,ZA2G_BOVIN,FADD_BOVIN,IL18_CHICK,B2MG_SIGHI,	15
GO:0032612	interleukin-1 production	Immune response	16/2882	111/62406	5.21e-05	0.00332421	0.00275757	Nan,TLR4_CRIGR,Nan,Nan,Nan,Nan,DMB_MOUSE,HMR1_PONAB,Nan,Nan,Nan,NL1B3_MOUSE,SUCR1_RAT,ZA2G_BOVIN,Nan,Nan,	16
GO:0042098	T cell proliferation	Immune response	19/2882	179/62406	0.000667621	0.0179844	0.0149188	MALT1_HUMAN,NICA_MOUSE,FKB1B_HUMAN,PP2BB_HUMAN,ITB2_HUMAN,MOES_MOUSE,CD151_HUMAN,ABL1_HUMAN,ITAD_MOUSE,IL12B_PIG,DOCK8_HUMAN,PTPRC_HUMAN,RIPK2_MOUSE,TN13B_HUMAN,RIPK2_MOUSE,ABL1_HUMAN,TNF14_HUMAN,FYN_XENLA,IL1B_TRIVU,	19
GO:0032677	regulation of interleukin-8 production	Immune response	20/2882	169/62406	0.000114588	0.00552471	0.00458298	TLR3_BOSTR,DDIT3_BOVIN,PARK7_CHICK,Nan,TLR4_CRIGR,PAR1_XENLA,TLR7_HUMAN,CAMP_NAJAT,TIRAP_HUMAN,TNFB_BOVIN,PTPRC_HUMAN,NL1B3_MOUSE,CAMP_NAJAT,AF1L2_XENLA,Nan,OTU7B_HUMAN,Nan,FADD_BOVIN,HMGB1_RAT,IL18_CHICK,	20
GO:0034340	response to type I interferon	Immune response	24/2882	177/62406	2.43e-06	0.000424708	0.000352313	Nan,EGR1_XENTR,IN35_HUMAN,IN35_HUMAN,IRF1_CHICK,Nan,SETD2_HUMAN,IRF8_CHICK,Nan,Nan,IFM3_RAT,HMR1_PONAB,Nan,Nan,INAR1_BOVIN,Nan,Nan,IFIT5_HUMAN,JAK1_HUMAN,ZA2G_BOVIN,IFM3_HUMAN,Nan,Nan,INRA2_ONCMY,	24
GO:0060333	type II interferon-mediated signaling pathway	Immune response	24/2882	189/62406	7.67e-06	0.000903081	0.000749143	Nan,KCC2G_MOUSE,IRF1_CHICK,Nan,HA23_MOUSE,CD44_CANLF,TRIM8_MOUSE,IRF8_CHICK,Nan,VCAM1_HUMAN,Nan,VCAM1_HUMAN,Nan,HMR1_PONAB,Nan,Nan,Nan,JAK1_HUMAN,ZA2G_BOVIN,Nan,Nan,Nan,CD44_CANLF,B2MG_SIGHI,	24
GO:0030595	leukocyte chemotaxis	Immune response	24/2882	258/62406	0.000975097	0.0227504	0.0188724	TNR11_MOUSE,MYO9B_MOUSE,CH25H_DANRE,Nan,GBF1_MOUSE,KPCA_RAT,CCL20_HUMAN,ITB2_HUMAN,IL8_CHICK,FCER2_MOUSE,ITAD_MOUSE,SCG2_PELRI,IL17B_MOUSE,ITA1_MOUSE,IL8_CHICK,IL16_MACFA,I17RA_MOUSE,KIT_XENLA,CAMP_NAJAT,S1PR1_MOUSE,ADAM8_HUMAN,AGRE2_MACMU,RL13A_CYAPA,HMGB1_RAT,	24
GO:0001816	cytokine production	Immune response	38/2882	413/62406	5.13e-05	0.00332421	0.00275757	Nan,IRF3_HUMAN,I18RA_HUMAN,TLR4_CRIGR,A4_PIG,HEG1_HUMAN,Nan,IRF8_CHICK,LTBP3_HUMAN,WN2BA_XENLA,Nan,Nan,G6PD_OSPRO,IL8_CHICK,Nan,DMB_MOUSE,HMR1_PONAB,Nan,Nan,RFTN1_CHICK,INAR1_BOVIN,Nan,NL1B3_MOUSE,CHERP_MOUSE,SUCR1_RAT,KIT_XENLA,ITAV_CHICK,ZA2G_BOVIN,HIF1A_CHICK,FOXP1_XENLA,Nan,Nan,ROCK2_BOVIN,HIF1A_CHICK,Nan,Nan,HMGB1_RAT,IL18_CHICK,	38
GO:0051928	positive regulation of calcium ion transport	Ion transport	30/2882	316/62406	0.000174072	0.00732716	0.00607818	PLCG2_HUMAN,PDPK1_RAT,Nan,APJA_XENLA,RAB44_HUMAN,TOR2A_XENLA,Nan,BMP4_XENLA,AT2C2_HUMAN,AT2A2_CHICK,PAR1_XENLA,TRPV1_HUMAN,CAV1_CHICK,P2RX4_HUMAN,G6PD_OSPRO,IL8_CHICK,STIM2_HUMAN,ABL1_HUMAN,CRCM1_XENLA,PKD2_HUMAN,RPGF3_RAT,ADRB2_RAT,PAR4_MOUSE,MYLK_BOVIN,RAMP3_HUMAN,ABL1_HUMAN,GPER1_HUMAN,TSPO_MOUSE,NIPS2_HUMAN,CEMIP_HUMAN,	30
GO:0010883	regulation of lipid storage	lipid	27/2882	254/62406	5.53e-05	0.00343948	0.00285319	METK1_HUMAN,COPZ1_PONAB,MSRE_MOUSE,S13A2_MOUSE,MEST_HUMAN,GTPB4_HUMAN,AT2A2_CHICK,RAB32_MOUSE,DGAT1_MOUSE,PPARD_HUMAN,TOR1B_HUMAN,ITB3_HUMAN,TNFB_BOVIN,S35F5_MOUSE,BSCL2_BOVIN,SRBP2_XENLA,INSR_XENLA,NFKB1_HUMAN,Nan,NB5R3_BOVIN,ITAV_CHICK,CO3_CAVPO,AKT2A_XENLA,APOB_HUMAN,LIPL_CHICK,MK11_MOUSE,EHD1_BOVIN,	27
GO:0008203	cholesterol metabolic process	lipid	30/2882	358/62406	0.00135717	0.0268742	0.0222933	FPPS_CHICK,ADX_CHICK,MFAP4_BOVIN,APLP2_HUMAN,CH25H_DANRE,LRP1_CHICK,ST2B1_HUMAN,A4_PIG,APOE_ALLMI,LRP5_HUMAN,CP27A_RAT,HNFAB_XENLA,ARHB_XENLA,VLDLR_HUMAN,G6PD_OSPRO,ARV1_BOVIN,PPARD_HUMAN,Nan,CLN6_HUMAN,HEMH_XENLA,SRBP2_XENLA,ST2B1_MOUSE,VIGLN_HUMAN,CEBPA_HUMAN,PPCT_BOVIN,Nan,PLPP6_HUMAN,APOB_HUMAN,CP46A_HUMAN,NPC1_PIG,	30
GO:0032368	regulation of lipid transport	lipid	31/2882	304/62406	3.64e-05	0.00264789	0.00219654	BMP6_HUMAN,HNRPK_CHICK,KC1DB_DANRE,TNR11_MOUSE,P2RY2_HUMAN,LRP1_CHICK,BMP4_XENLA,PLPL9_MOUSE,SURF4_TAKRU,TMF1_HUMAN,APOE_ALLMI,DAB2_MOUSE,NRG1_MOUSE,P2RX4_HUMAN,ARHB_XENLA,ARV1_BOVIN,DGAT1_MOUSE,PPARD_HUMAN,ITB3_HUMAN,TNFB_BOVIN,SRBP2_XENLA,NCOR1_XENTR,PTC1_CHICK,NFKB1_HUMAN,ITAV_CHICK,PLPL9_MOUSE,Nan,AKT2A_XENLA,KC1DB_DANRE,LTOR1_XENTR,NPC1_PIG,	31
GO:0030670	phagocytic vesicle membrane	Material transport	24/2882	253/62406	0.000742384	0.0192251	0.015948	PI3R4_HUMAN,LAMP2_HUMAN,CY24A_BOVIN,ATG5_BOVIN,RAB10_CHICK,IPO8_HUMAN,FAM3A_PONAB,VA0D1_DANRE,RAB32_MOUSE,ATG12_HUMAN,TPSN_CHICK,HMR1_PONAB,Nan,VPP2_BOVIN,I5P2_MOUSE,RAB8B_PONAB,VAMP8_RAT,VPP2_MOUSE,ZA2G_BOVIN,ZA2G_BOVIN,TLR2_MOUSE,LAMP1_CHICK,SPHK2_HUMAN,B2MG_SIGHI,	24
GO:0045921	positive regulation of exocytosis	Material transport	26/2882	294/62406	0.00128807	0.0262959	0.0218135	SDCB1_HUMAN,MYO5B_HUMAN,RAB2B_HUMAN,BICD2_HUMAN,AA3R_BOVIN,STXB1_CHICK,PLPL9_MOUSE,CAPS2_MOUSE,RAB3D_MOUSE,KPCA_RAT,UN13D_HUMAN,ITB2_HUMAN,FAM3A_PONAB,MYO6_PIG,IL4RA_PIG,ITAD_MOUSE,CAPS2_MOUSE,VAMP8_RAT,VPS4A_RAT,PLPL9_MOUSE,GATA2_XENLA,LAMP1_CHICK,Nan,EXPH5_HUMAN,VPS4B_BOVIN,STXB2_CANLF,	26
GO:0030666	endocytic vesicle membrane	Material transport	34/2882	379/62406	0.000199124	0.00799696	0.00663381	PI3R4_HUMAN,RB11A_CHICK,KCC2G_MOUSE,LAMP2_HUMAN,LRP1_CHICK,CY24A_BOVIN,MSRE_MOUSE,ATG5_BOVIN,HA23_MOUSE,IPO8_HUMAN,APOE_ALLMI,STAB2_HUMAN,CAV1_CHICK,FAM3A_PONAB,VA0D1_DANRE,FZD5_XENLA,ATG12_HUMAN,STAB1_HUMAN,TPSN_CHICK,HMR1_PONAB,SMO_CHICK,Nan,VPP2_BOVIN,PTC1_CHICK,VAMP8_RAT,Nan,VPP2_MOUSE,ZA2G_BOVIN,ZA2G_BOVIN,LAMP1_CHICK,EPN2_MOUSE,APOB_HUMAN,SH3G2_CHICK,B2MG_SIGHI,	34
GO:0046943	carboxylic acid transmembrane transporter activity	Material transport	35/2882	372/62406	6.36e-05	0.00376195	0.00312069	MPC1_RAT,PCFT_XENLA,LAT2_PONAB,LAT4_XENTR,SO2A1_RAT,S27A4_HUMAN,SERC1_MOUSE,BASI_CHICK,YLAT2_XENLA,S13A2_MOUSE,S19A1_HUMAN,SO2B1_HUMAN,Nan,Nan,SC5AC_HUMAN,SPHM_HUMAN,Nan,SC6A6_RAT,GHC1_HUMAN,S2532_CRIGR,SERC5_MACFA,SFXN5_MOUSE,S27A6_MOUSE,S22AD_MOUSE,S15A4_XENLA,LAT4_MOUSE,P3_BOVIN,CTR1_HUMAN,S22AD_MOUSE,S6A19_RAT,M2OM_HUMAN,MOT9_HUMAN,S26A1_RAT,YLAT1_MOUSE,Nan,	35
GO:1903169	regulation of calcium ion transmembrane transport	Material transport	35/2882	387/62406	0.000138595	0.00633453	0.00525476	PLCG2_HUMAN,PDPK1_RAT,APJA_XENLA,RAB44_HUMAN,FKB1B_HUMAN,TOR2A_XENLA,BMP4_XENLA,PLPL9_MOUSE,CY24A_BOVIN,PRIO_CHICK,ATG5_BOVIN,STK11_XENLA,AT2A2_CHICK,PAR1_XENLA,FAK2_HUMAN,G6PD_OSPRO,IL8_CHICK,APJ_MACMU,STIM2_HUMAN,ABL1_HUMAN,PKD2_HUMAN,RPGF3_RAT,ITB3_HUMAN,Nan,ADRB2_RAT,PAR4_MOUSE,RAMP3_HUMAN,ABL1_HUMAN,PLPL9_MOUSE,GPER1_HUMAN,1433E_SHEEP,AHNK_HUMAN,FYN_XENLA,NIPS2_HUMAN,CEMIP_HUMAN,	35
GO:0006022	aminoglycan metabolic process	Metabolic processes	47/2882	396/62406	4.25e-09	3.06e-06	2.54e-06	CHSTC_XENLA,SDC3_CHICK,SMC5_XENLA,B4GT6_HUMAN,SMAP1_MOUSE,CHSTB_HUMAN,BGLR_CANLF,CEIP2_HUMAN,MRP5_HUMAN,CD44_CANLF,MRP5_MOUSE,CSPG4_HUMAN,STAB2_HUMAN,ANAG_HUMAN,SULF1_COTCO,VGFR2_COTJA,ENASE_MOUSE,HYAL2_BITAR,SDC2_HUMAN,H6ST1_CHICK,CHP1_RAT,B3GT6_HUMAN,HS3SB_HUMAN,HMMR_HUMAN,CHSTE_HUMAN,SPHM_HUMAN,SIA4B_RAT,CLN6_HUMAN,CSPG2_CHICK,GPC1_XENTR,SIA4C_RAT,LYVE1_MOUSE,DIAC_MOUSE,CAHM6_RAT,AGRIN_CHICK,B…	47
GO:0030214	hyaluronan catabolic process	Metabolic processes	10/2882	64/62406	0.000670985	0.0179844	0.0149188	BGLR_CANLF,CEIP2_HUMAN,CD44_CANLF,STAB2_HUMAN,HYAL2_BITAR,CHP1_RAT,HMMR_HUMAN,LYVE1_MOUSE,CD44_CANLF,CEMIP_HUMAN,	10
GO:0006195	purine nucleotide catabolic process	Metabolic processes	13/2882	109/62406	0.00158185	0.0300404	0.0249198	NUD15_MOUSE,MESH1_XENTR,HPRT_CHICK,5NTD_HUMAN,5NTC_XENTR,PDE1B_HUMAN,ADA_XENTR,PDE1C_MOUSE,BACH_HUMAN,GUAD_PONAB,GMPR2_HUMAN,ADA_XENTR,PDE2A_BOVIN,	13
GO:0010712	regulation of collagen metabolic process	Metabolic processes	16/2882	110/62406	4.66e-05	0.00313457	0.00260025	Nan,AATC_CHICK,ITB1A_XENLA,Nan,BMP4_XENLA,CR3L1_HUMAN,EP300_HUMAN,PAR1_XENLA,SEPR_BOVIN,PPARD_HUMAN,Nan,PKD2_HUMAN,RPGF3_RAT,ITA2_HUMAN,MFAP4_BOVIN,IL18_CHICK,	16
GO:0046148	pigment biosynthetic process	Metabolic processes	18/2882	184/62406	0.00229103	0.0379741	0.0315011	S23IP_HUMAN,COX10_MOUSE,HEM6_HUMAN,HPRT_CHICK,AP3D1_MOUSE,BCDO2_MUSPF,S2539_DANRE,HNFAB_XENLA,RAB32_MOUSE,HEM0_MOUSE,ADA_XENTR,HEM3_MOUSE,HEMH_XENLA,GUAD_PONAB,PUR6_CHICK,ADA_XENTR,Nan,HPS5_HUMAN,	18
GO:0006027	glycosaminoglycan catabolic process	Metabolic processes	20/2882	147/62406	1.54e-05	0.00141053	0.00117009	SDC3_CHICK,BGLR_CANLF,CEIP2_HUMAN,CD44_CANLF,CSPG4_HUMAN,STAB2_HUMAN,ANAG_HUMAN,ENASE_MOUSE,HYAL2_BITAR,SDC2_HUMAN,CHP1_RAT,HMMR_HUMAN,SPHM_HUMAN,CSPG2_CHICK,GPC1_XENTR,LYVE1_MOUSE,AGRIN_CHICK,PGS1_XENLA,CD44_CANLF,CEMIP_HUMAN,	20
GO:0043666	regulation of phosphoprotein phosphatase activity	Metabolic processes	23/2882	264/62406	0.00285685	0.0442419	0.0367005	PP4R1_HUMAN,PTNB_XENLA,WBP11_HUMAN,Nan,CSK21_XENLA,PP6R1_HUMAN,FKB1B_HUMAN,2AAB_RAT,ENPL_BOVIN,P2R3B_HUMAN,Nan,PHAR3_HUMAN,NEB2_RAT,2A5G_HUMAN,RCAN3_CHICK,TNFB_BOVIN,CSPG2_CHICK,ITA1_MOUSE,PP14D_HUMAN,PP16B_BOVIN,ROCK2_BOVIN,UBX2A_HUMAN,2AAA_PIG,	23
GO:0019218	regulation of steroid metabolic process	lipid	30/2882	265/62406	6.47e-06	0.000792183	0.000657149	FPPS_CHICK,BMP6_HUMAN,EGR1_XENTR,FOXA2_XENTR,ADX_CHICK,VDR_XENLA,SNAI2_XENLA,PEX2_XENLA,APOE_ALLMI,CHIP_CHICK,DAB2_MOUSE,ARHB_XENLA,S14L2_RAT,PROX1_HUMAN,ARV1_BOVIN,TNFB_BOVIN,KCMA1_XENLA,SRBP2_XENLA,IGF2B_XENLA,BMP5_HUMAN,PANK2_HUMAN,NFKB1_HUMAN,KIT_XENLA,RESTB_XENLA,Nan,APOB_HUMAN,FAS_CHICK,AT1A1_XENLA,DHHA_XENLA,LTOR1_XENTR,	30
GO:0043467	regulation of generation of precursor metabolites and energy	Metabolic processes	30/2882	356/62406	0.00124425	0.0257446	0.0213562	SIR6_HUMAN,CO72L_HUMAN,PYGL_RAT,PARK7_CHICK,DJC15_XENTR,TRAP1_MOUSE,PP13G_MOUSE,OGT1_RAT,FLCN_XENTR,PPR3C_XENTR,BNIP3_HUMAN,Nan,TRPV4_HUMAN,PPARD_HUMAN,PPR3C_XENLA,NOP53_HUMAN,IEX1_HUMAN,IGF2B_XENLA,INSR_XENLA,NCOR1_XENTR,MD27A_XENLA,OGT1_RABIT,CHERP_MOUSE,PDE2A_BOVIN,HIF1A_CHICK,HIF1A_CHICK,AKT2A_XENLA,Nan,DYRK2_MOUSE,HMGB1_RAT,	30
GO:0006665	sphingolipid metabolic process	Metabolic processes	33/2882	385/62406	0.000549409	0.0157605	0.0130739	SPTC2_MOUSE,VAPB_BOVIN,CLN3_CANLF,PAG15_BOVIN,B4GT6_HUMAN,SERC1_MOUSE,DEGS1_XENTR,ORML2_HUMAN,SMS2_RAT,HACD2_MOUSE,B3GT5_MOUSE,SPHK2_HUMAN,ASAH1_RAT,TEX2_HUMAN,SSDH_RAT,ELOV5_XENTR,G3ST1_BOVIN,ARV1_BOVIN,PPGB_BOVIN,PEMT_BOVIN,CLN6_HUMAN,ACER2_HUMAN,SPNS2_XENTR,B3GT2_MOUSE,NEUR3_HUMAN,SERC5_MACFA,HACD4_XENLA,KIT_XENLA,SGPL1_HUMAN,HACD1_SHEEP,FUT6_PANTR,2AAA_PIG,LOX5_MOUSE,	33
GO:1901136	carbohydrate derivative catabolic process	Metabolic processes	40/2882	498/62406	0.000567929	0.016066	0.0133274	MESH1_XENTR,SDC3_CHICK,HPRT_CHICK,Nan,BGLR_CANLF,CEIP2_HUMAN,5NTD_HUMAN,CD44_CANLF,CSPG4_HUMAN,STAB2_HUMAN,ANAG_HUMAN,MA1B1_HUMAN,ENASE_MOUSE,PDE1B_HUMAN,HYAL2_BITAR,ADA_XENTR,SDC2_HUMAN,CHP1_RAT,PDE1C_MOUSE,HMMR_HUMAN,SPHM_HUMAN,BACH_HUMAN,CSPG2_CHICK,GPC1_XENTR,GMPR2_HUMAN,LYVE1_MOUSE,DIAC_MOUSE,NPLA_XENLA,NEUR3_HUMAN,UNG_HUMAN,ADA_XENTR,PDE2A_BOVIN,AGRIN_CHICK,PGS1_XENLA,RENBP_PIG,Nan,CD44_CAN…	40
GO:0051150	regulation of smooth muscle cell differentiation	Muscle development and activity	11/2882	85/62406	0.00183239	0.0329106	0.0273007	ANR17_HUMAN,NFAC3_RAT,BMP4_XENLA,SRF_XENLA,DNMT1_CHICK,FOXO4_MOUSE,KIT_XENLA,NOGG_XENLA,GPER1_HUMAN,SMRD3_MOUSE,FXF1B_XENLA,	11
GO:0006940	regulation of smooth muscle contraction	Muscle development and activity	21/2882	179/62406	8.88e-05	0.00465005	0.00385741	ITB1A_XENLA,GCYA1_CANLF,SRF_XENLA,SRC8_CHICK,PAR1_XENLA,ITB2_HUMAN,CAV1_CHICK,ADA_XENTR,STIM2_HUMAN,ITB3_HUMAN,KCMA1_XENLA,CNN1_BOVIN,Nan,ADRB2_RAT,IRAG1_HUMAN,SHC1_XENLA,GABT_PIG,KIT_XENLA,ADA_XENTR,ITA2_HUMAN,GPER1_HUMAN,	21
GO:0048661	positive regulation of smooth muscle cell proliferation	Muscle development and activity	23/2882	258/62406	0.00213676	0.0368827	0.0305957	EGR1_XENTR,M3K5_HUMAN,BMP4_XENLA,CY24A_BOVIN,TLR4_CRIGR,KPCA_RAT,SULF1_COTCO,MMP9_RABIT,DNMT1_CHICK,PGDH_HUMAN,ITB3_HUMAN,TNFB_BOVIN,ATS1_HUMAN,SHC1_XENLA,PDGFD_HUMAN,HIF1A_CHICK,S1PR1_MOUSE,FOXP1_XENLA,ITA2_HUMAN,TGM2_CHICK,HIF1A_CHICK,SULF1_COTCO,IL18_CHICK,	23
GO:1902230	negative regulation of intrinsic apoptotic signaling pathway in response to DNA damage	DNA	10/2882	76/62406	0.00256533	0.0411831	0.0341631	UBE2B_RAT,BID_CHICK,SNAI2_XENLA,CD44_CANLF,SKP1_RAT,KDM1A_MOUSE,TRI32_HUMAN,SFRP2_CANLF,CD44_CANLF,ACKR3_MOUSE,	10
GO:0043516	regulation of DNA damage response signal transduction by p53 class mediator	DNA	14/2882	113/62406	0.000729877	0.0189412	0.0157125	ULA1_RAT,DDX5_HUMAN,UBE2B_RAT,PSD10_HUMAN,SNAI2_XENLA,HIC1_CHICK,ATR_XENLA,CD44_CANLF,SKP1_RAT,ABL1_HUMAN,KDM1A_MOUSE,ATM_HUMAN,ABL1_HUMAN,CD44_CANLF,	14
GO:0045601	regulation of endothelial cell differentiation	repir	15/2882	81/62406	4.06e-06	0.000571088	0.000473741	BMP6_HUMAN,VEZF1_HUMAN,TNR1A_HUMAN,BMP4_XENLA,ADDA_RAT,CEAM1_MOUSE,VGFR2_COTJA,CLD5_BOVIN,TNFB_BOVIN,TAL1_XENLA,TGFR1_PIG,CHERP_MOUSE,HMCN1_MOUSE,ROCK2_BOVIN,Nan,	15
GO:2000425	regulation of apoptotic cell clearance	repir	17/2882	138/62406	0.000223415	0.00860569	0.00713878	ABI2_HUMAN,Nan,PDIA6_MOUSE,CRKL_MOUSE,ABI1_HUMAN,ITA8_HUMAN,STIM2_HUMAN,ABL1_HUMAN,Nan,ITAV_CHICK,ABL1_HUMAN,ELMO3_BOVIN,TGM2_CHICK,CO3_CAVPO,MTMR1_HUMAN,ITA5_XENLA,HMGB1_RAT,	17
GO:0001570	vasculogenesis	repir	26/2882	203/62406	2.79e-06	0.000455582	0.000377925	YAP1A_XENLA,APJA_XENLA,JUNB_RAT,CHERP_MOUSE,MYO1E_HUMAN,TIE1_MOUSE,ADML_MOUSE,HEG1_HUMAN,SETD2_HUMAN,CAV1_CHICK,VGFR2_COTJA,BRPF1_MOUSE,PITX2_XENLA,SMO_CHICK,Nan,EGFL7_RAT,TAL1_XENLA,AGGF1_MOUSE,CHERP_MOUSE,SGPL1_HUMAN,RAMP2_MOUSE,EGFL8_PIG,EPHA2_HUMAN,ACKR3_MOUSE,FXF1B_XENLA,BRPF1_MOUSE,	26
GO:0001936	regulation of endothelial cell proliferation	repir	39/2882	234/62406	3.95e-12	2.42e-08	2.01e-08	SIR6_HUMAN,BMP6_HUMAN,PDPK1_RAT,VEGFC_MOUSE,APJA_XENLA,DPOD4_MOUSE,NR4A1_XENLA,Nan,BMP4_XENLA,CY24A_BOVIN,TIE1_MOUSE,KPCA_RAT,Nan,ADA17_HUMAN,APOE_ALLMI,PIGM_XENTR,CXA1_XENLA,CAV1_CHICK,SULF1_COTCO,VGFR2_COTJA,VASH2_HUMAN,CAV2_DIDVI,PROX1_HUMAN,RICTR_HUMAN,ITB3_HUMAN,TNFB_BOVIN,SCG2_PELRI,EGFL7_RAT,IGF2B_XENLA,AGGF1_MOUSE,PP16B_BOVIN,TGFR1_PIG,NRP2_HUMAN,HIF1A_CHICK,GATA2_XENLA,FUT1_HUMAN,HIF1A_C…	39
GO:0006901	vesicle coating	secretion	18/2882	161/62406	0.000493548	0.014394	0.0119404	S23IP_HUMAN,KC1DB_DANRE,SC24A_BOVIN,STX5_BOVIN,SC31A_CHICK,PP6R1_HUMAN,Nan,GBF1_MOUSE,PIGM_XENTR,TPPC2_XENTR,PPP6_RAT,TMEDA_BOVIN,TMED2_CRIGR,USO1_MOUSE,AREG_HUMAN,ANR28_HUMAN,KC1DB_DANRE,SC24C_HUMAN,	18
GO:0048194	Golgi vesicle budding	secretion	20/2882	210/62406	0.00186812	0.0333565	0.0276706	S23IP_HUMAN,VAPB_BOVIN,KC1DB_DANRE,SC24A_BOVIN,STX5_BOVIN,SC31A_CHICK,PP6R1_HUMAN,Nan,GBF1_MOUSE,PIGM_XENTR,TPPC2_XENTR,PPP6_RAT,TMEDA_BOVIN,TMED2_CRIGR,GOLP3_RAT,USO1_MOUSE,AREG_HUMAN,ANR28_HUMAN,KC1DB_DANRE,SC24C_HUMAN,	20

## Sheet: stomach_ontology_Trinotate
ID	Description	function	GeneRatio	BgRatio	pvalue	p.adjust	qvalue	,	Count
GO:1905952	regulation of lipid localization	lipid Metabolic processes	39/2277	497/62406	8.15e-06	0.00558256	0.00499125	COPG1_HUMAN,COPD_PONAB,COPB_CHICK,KC1DB_DANRE,CP4B1_MOUSE,PPARD_HUMAN,RAC3_MOUSE,WASH1_XENTR,RAB32_MOUSE,MEST_HUMAN,COPZ1_PONAB,ITAV_CHICK,CP2AD_HUMAN,GTPB4_HUMAN,METK1_MOUSE,PLPL9_MOUSE,NB5R3_BOVIN,DGAT1_MOUSE,ITB3_HUMAN,BSCL2_BOVIN,KC1DB_DANRE,S35F5_MOUSE,ARV1_BOVIN,GHRL_AQUCT,SIR1_MOUSE,PLPL9_MOUSE,Nan,NCOR1_XENTR,TOR1B_HUMAN,RAB38_HUMAN,ANGT_BOVIN,S15A2_DANRE,INSR_XENLA,THIC_RAT,LIPL_CHICK,NF…	39
GO:0005776	autophagosome	autophagosome	38/2277	371/62406	1.44e-08	8.2e-05	7.33e-05	TBCD5_HUMAN,WIPI1_XENLA,NCO4B_XENLA,CLN3_CANLF,TM230_RAT,EPN2_MOUSE,CI072_MOUSE,GBRAP_RAT,ATG5_BOVIN,RB11A_CHICK,LAMP2_HUMAN,SQSTM_MOUSE,HSP7C_RAT,WASH1_XENTR,WIPI2_CHICK,RAB32_MOUSE,ATG4B_XENLA,NRBF2_HUMAN,Nan,A16L2_HUMAN,GBRL1_XENTR,BECN1_XENLA,MLP3B_HUMAN,WDFY3_HUMAN,ATG3_XENLA,RPN2_PONAB,MIOSA_XENLA,RO52_MOUSE,SRPX_HUMAN,AMRA1_HUMAN,RAB12_RAT,ATG12_HUMAN,RAB38_HUMAN,RO52_MOUSE,LAMP1_CHICK,ULK…	38
GO:0140053	mitochondrial gene expression	mitochondrial	34/2277	413/62406	1.12e-05	0.00558256	0.00499125	MTRFR_HUMAN,RM22_XENTR,IF2M_BOVIN,CHCH1_MOUSE,RM49_MOUSE,ERAL1_MOUSE,RM45_XENLA,RT18A_HUMAN,RM04_BOVIN,EFTS_XENLA,RT27_HUMAN,TFAM_PIG,RM02_HUMAN,AKIP_HUMAN,RT30_BOVIN,S2533_BOVIN,RM42_HUMAN,SYYM_RAT,RT06_BOVIN,S2536_CHICK,GATB_HUMAN,TFB2M_BOVIN,TR61B_HUMAN,RT07_XENLA,RM28_XENLA,RM17_BOVIN,SYEM_XENTR,RM48_MOUSE,HARS1_BOVIN,GARS_PONAB,MTEF3_HUMAN,PUS1_HUMAN,RM36_RAT,RT26_MOUSE,	34
GO:0030662	coated vesicle membrane	Secretion	33/2277	436/62406	7.8e-05	0.0154212	0.0137878	Nan,COPG1_HUMAN,USO1_MOUSE,COPD_PONAB,COPB_CHICK,AP2S1_RAT,SAR1A_PONAB,SC22B_XENTR,TMEDA_BOVIN,EPN2_MOUSE,MPRI_BOVIN,STX5_BOVIN,SC31A_CHICK,SH3G2_CHICK,SCAP_XENLA,COPZ1_PONAB,PIGM_XENTR,TMED2_CRIGR,HA19_CANLF,NB5R3_BOVIN,RAB35_RAT,NECP2_RAT,ZA2G_BOVIN,SCRB2_RAT,Nan,AP1M2_MOUSE,GOSR2_RAT,APOE_ALLMI,VAMP8_RAT,SC24C_HUMAN,CLCB_RAT,CEMIP_HUMAN,B2MG_SIGHI,	33
GO:2001242	regulation of intrinsic apoptotic signaling pathway	tissue repir	33/2277	477/62406	0.00040264	0.0338396	0.0302553	DDX3_XENLA,PTN1_CHICK,UBB_BOVIN,PARP1_XENLA,PARK7_CHICK,HS105_HUMAN,BID_CHICK,RL11_RAT,NEMF_HUMAN,Nan,UBE2B_RAT,NONO_MOUSE,CR3L1_HUMAN,FLCN_XENTR,TRAP1_MOUSE,TXD12_EPICO,Nan,I20RA_MOUSE,CR3L1_HUMAN,BID_CHICK,Nan,LFG1_HUMAN,HIF1A_CHICK,NS1BP_XENLA,SIR1_MOUSE,NL1B3_MOUSE,E2AK3_BOVIN,STEA3_HUMAN,STEA3_HUMAN,BAP31_PONAB,NDUS3_GORGO,BCLF1_HUMAN,Nan,	33
GO:0006473	protein acetylation	Protein modification	33/2277	490/62406	0.00064062	0.0422585	0.0377824	NAA10_MOUSE,EP400_HUMAN,SP20H_HUMAN,NAA10_MOUSE,RUVB1_XENLA,PCGF2_HUMAN,NAT9_HUMAN,NAA20_MOUSE,EP300_HUMAN,BRD8_HUMAN,SP20H_HUMAN,NAA35_CHICK,OGT1_RAT,NAA25_HUMAN,Nan,TAF5L_HUMAN,KANL3_MOUSE,HNFAB_XENLA,ESCO1_HUMAN,SGF29_HUMAN,BRPF1_MOUSE,KAT2B_HUMAN,MBD3_HUMAN,APBB1_MOUSE,PHF20_HUMAN,OGT1_RABIT,NAA15_HUMAN,ING3_XENTR,SIR1_MOUSE,NAT10_HUMAN,EAF6_XENTR,TAD2A_HUMAN,SP20H_HUMAN,	33
GO:0071216	cellular response to biotic stimulus	stimulus	33/2277	496/62406	0.000787188	0.0472563	0.0422508	PPARD_HUMAN,FINC_XENLA,PARK7_CHICK,Nan,FINC_XENLA,NR1H4_BOVIN,BYST_HUMAN,IKBL1_PIG,ABL1_HUMAN,OGT1_RAT,SHPK_HUMAN,ALR_MOUSE,TNIP2_MOUSE,Nan,OGT1_RABIT,IL18_CHICK,HIF1A_CHICK,CDC73_CHICK,Nan,IL8_CHICK,RHOA_PONAB,LYRIC_MOUSE,Nan,NL1B3_MOUSE,Nan,E2AK3_BOVIN,Nan,Nan,LYN_HUMAN,NFKB1_HUMAN,NOS3_HUMAN,Nan,B2MG_SIGHI,	33
GO:0010821	regulation of mitochondrion organization	mitochondrial	30/2277	392/62406	0.000132504	0.0190105	0.0169969	1433B_CHICK,PARK7_CHICK,PISD_BOVIN,BID_CHICK,PSD10_HUMAN,SQSTM_MOUSE,EP300_HUMAN,MIRO1_MOUSE,FLCN_XENTR,RNF41_XENLA,TI16B_XENLA,PYRD_BOVIN,ASPP1_MOUSE,MFN1_MOUSE,MUL1_XENLA,BNIP3_HUMAN,PLPL9_MOUSE,BID_CHICK,Nan,HIF1A_CHICK,GOLP3_RAT,PLPL9_MOUSE,NL1B3_MOUSE,ATG7_HUMAN,MIGA2_XENLA,Nan,1433E_SHEEP,MIDUO_HUMAN,Nan,ROMO1_MOUSE,	30
GO:0042157	lipoprotein metabolic process	lipid Metabolic processes	29/2277	304/62406	2.96e-06	0.00333654	0.00298313	WIPI1_XENLA,PIGO_HUMAN,PIGS_RAT,SERC1_MOUSE,ZDHC5_RAT,PPARD_HUMAN,ZDH13_PONAB,STX5_BOVIN,ATG5_BOVIN,ZDHC7_MOUSE,Nan,PIGH_HUMAN,WIPI2_CHICK,ABHDD_XENLA,ATG4B_XENLA,ZDH16_HUMAN,SUN2_HUMAN,PIGM_XENTR,Nan,ATG4D_XENLA,PIGU_HUMAN,PIGL_MOUSE,ATM_HUMAN,ABD12_XENTR,Nan,ATG7_HUMAN,ATG12_HUMAN,Nan,APOE_ALLMI,	29
GO:0032543	mitochondrial translation	mitochondrial	29/2277	386/62406	0.000231523	0.026534	0.0237235	MTRFR_HUMAN,RM22_XENTR,IF2M_BOVIN,CHCH1_MOUSE,RT16_PONAB,RM49_MOUSE,ERAL1_MOUSE,RM45_XENLA,RT18A_HUMAN,RM04_BOVIN,EFTS_XENLA,RT27_HUMAN,RM02_HUMAN,AKIP_HUMAN,RT30_BOVIN,RM42_HUMAN,SYYM_RAT,RT06_BOVIN,GATB_HUMAN,RT07_XENLA,RM28_XENLA,RM17_BOVIN,SYEM_XENTR,RM48_MOUSE,HARS1_BOVIN,GARS_PONAB,MTEF3_HUMAN,RM36_RAT,RT26_MOUSE,	29
GO:0006022	aminoglycan metabolic process	Metabolic processes	29/2277	396/62406	0.00035293	0.0319304	0.0285483	BGLR_CANLF,MRP5_MOUSE,B3GN7_RAT,CHIA_RAT,GPC1_XENTR,H6ST1_CHICK,HYAL2_BITAR,GNS_HUMAN,CHP1_RAT,ANAG_HUMAN,GNA1_PONAB,CLN6_HUMAN,B3GN2_MOUSE,B3GN4_HUMAN,CHSTE_HUMAN,HMMR_HUMAN,ENASE_MOUSE,PGS1_XENLA,SPHM_HUMAN,CHSS1_HUMAN,DIAC_MOUSE,B4GT4_HUMAN,HAB4L_XENLA,AGRIN_CHICK,B4GA1_DANRE,B3GN3_HUMAN,XYLT2_MOUSE,CEMIP_HUMAN,CHIA_HUMAN,	29
GO:2001236	regulation of extrinsic apoptotic signaling pathway	tissue repir	28/2277	373/62406	0.000297635	0.0298774	0.0267127	RNF34_BOVIN,PARK7_CHICK,BID_CHICK,FAF1_HUMAN,PTPRC_HUMAN,GSH0_RAT,DAPK1_HUMAN,2AAB_RAT,SGK3_PONAB,ITAV_CHICK,GAS1_MOUSE,ACVR1_HUMAN,BID_CHICK,Nan,TGFR1_PIG,PSME3_PIG,TIMP3_XENLA,CFLAR_PONAB,NL1B3_MOUSE,SRPX_HUMAN,DPTOR_HUMAN,ANGT_BOVIN,FAIM1_BOVIN,HMGB1_RAT,NOS3_HUMAN,CD302_PIG,FADD_BOVIN,2AAA_PIG,	28
GO:0042440	pigment metabolic process	Metabolic processes	28/2277	375/62406	0.000324331	0.0309232	0.0276477	ISCA1_MACFA,HPRT_CHICK,EGR1_XENTR,RAC3_MOUSE,Nan,RPE65_AMBTI,RAB32_MOUSE,ARBK2_BOVIN,PRPS1_RAT,S23IP_HUMAN,DOCK7_HUMAN,HEM6_HUMAN,HEM0_MOUSE,HNFAB_XENLA,S2539_DANRE,C1TM_BOVIN,PMEL_CHICK,ADA2_XENLA,RHOA_PONAB,HEMH_XENLA,CP2G1_RABIT,Nan,PUR6_CHICK,VAV_BOVIN,RAB38_HUMAN,ADA_XENTR,HPS5_HUMAN,HEMO_HUMAN,	28
GO:0006665	sphingolipid metabolic process	Metabolic processes	28/2277	385/62406	0.00049214	0.035822	0.0320277	B3GN5_XENTR,AL3A2_MACFA,MTREX_MOUSE,SERC1_MOUSE,CLN3_CANLF,ACER2_HUMAN,CERT_XENTR,TECR_BOVIN,VAPB_BOVIN,B3GT2_PONAB,TEX2_HUMAN,B3GT5_MOUSE,CLN6_HUMAN,ELOV5_XENTR,ASAH1_RAT,PPGB_BOVIN,KIT_XENLA,ARV1_BOVIN,PEMT_BOVIN,CGT_HUMAN,SGPL1_HUMAN,MTREX_MOUSE,Nan,FUT6_PANTR,Nan,HACD2_MOUSE,LOX5_MOUSE,2AAA_PIG,	28
GO:0000045	autophagosome assembly	autophagosome	27/2277	270/62406	2.64e-06	0.00333026	0.00297752	WIPI1_XENLA,RAB7A_MOUSE,GBRAP_RAT,ATG5_BOVIN,ELAP1_HUMAN,SH3G2_CHICK,WIPI2_CHICK,ATG4B_XENLA,Nan,STX12_HUMAN,AP4M1_HUMAN,A16L2_HUMAN,GBRL1_XENTR,BECN1_XENLA,MLP3B_HUMAN,ATG4D_XENLA,CATD_CHIHA,PACS2_HUMAN,ATG3_XENLA,AMRA1_HUMAN,ATG7_HUMAN,ATG12_HUMAN,CATD_CHIHA,UBX2A_HUMAN,ATG13_XENTR,SH3G1_CHICK,ULK3_XENLA,	27
GO:0006766	vitamin metabolic process	Metabolic processes	27/2277	355/62406	0.000307646	0.0298774	0.0267127	CYB5_RABIT,AK1A1_XENTR,S5A3A_DANRE,MMAD_CHICK,PPARD_HUMAN,PUR9_HUMAN,Nan,GTR3_CHICK,CP3A9_RAT,VKORL_TAKRU,RPE65_AMBTI,UBIA1_XENTR,IF_MOUSE,S19A1_HUMAN,ABCD4_MOUSE,VDR_XENLA,C1TM_BOVIN,NB5R3_BOVIN,LGMN_MACFA,GLO2_XENTR,MMAB_MOUSE,TPK1_HUMAN,CP3A4_HUMAN,CP27A_RAT,S2532_CRIGR,MTRR_HUMAN,PANK2_HUMAN,	27
GO:0006900	vesicle budding from membrane	Secretion	26/2277	310/62406	8.43e-05	0.0154212	0.0137878	SNAA_MOUSE,SEC12_HUMAN,USO1_MOUSE,SAR1A_PONAB,SC22B_XENTR,KC1DB_DANRE,TMEDA_BOVIN,TBC20_BOVIN,STX5_BOVIN,VAPB_BOVIN,SC31A_CHICK,DYN2_MOUSE,FMR1B_XENLA,SCAP_XENLA,S23IP_HUMAN,Nan,PIGM_XENTR,TMED2_CRIGR,TPPC2_XENTR,PPP6_RAT,KC1DB_DANRE,GOLP3_RAT,VPS4A_RAT,GOSR2_RAT,SC24C_HUMAN,CLCB_RAT,	26
GO:0010623	programmed cell death involved in cell development	tissue repir	26/2277	312/62406	9.36e-05	0.0158469	0.0141684	WIPI1_XENLA,DDX3_XENLA,UBB_BOVIN,MTREX_MOUSE,E2F4_XENLA,Nan,FOXA2_XENTR,GBRAP_RAT,ATG5_BOVIN,DYN2_MOUSE,WIPI2_CHICK,SPOUT_HUMAN,CHERP_MOUSE,SPNS1_XENLA,GBRL1_XENTR,BECN1_XENLA,CATD_CHIHA,KIT_XENLA,UBP53_HUMAN,DNSL3_HUMAN,MED12_PONPY,ATG7_HUMAN,ATG12_HUMAN,MTREX_MOUSE,CATD_CHIHA,ATG13_XENTR,	26
GO:1903561	extracellular vesicle	Secretion	26/2277	347/62406	0.000492529	0.035822	0.0320277	PDC6I_XENLA,TS101_HUMAN,CH60_HUMAN,FINC_XENLA,PARK7_CHICK,IST1_BOVIN,ACTS_RAT,RB11A_CHICK,ITM2B_CHICK,FINC_XENLA,PGRC1_PONAB,LAMP2_HUMAN,Nan,TRAP1_MOUSE,MA1B1_HUMAN,ANAG_HUMAN,SL9A3_DIDVI,ARRD1_HUMAN,SDCB1_RAT,GALK2_HUMAN,AHNK_HUMAN,SDCB1_RAT,GARS_PONAB,TF29_SCHPO,SCNNA_XENLA,APOE_ALLMI,	26
GO:0019218	regulation of steroid metabolic process	Metabolic processes	25/2277	265/62406	1.67e-05	0.00702227	0.00627846	HYES_PIG,FOXA2_XENTR,EGR1_XENTR,NR1H4_BOVIN,HMCS1_CHICK,SCAP_XENLA,CHIP_CHICK,VDR_XENLA,KIT_XENLA,ERLN1_XENTR,ARV1_BOVIN,SIR1_MOUSE,Nan,S14L2_RAT,KIME_BOVIN,GBB3_MOUSE,DHHA_XENLA,PANK2_HUMAN,ANGT_BOVIN,FAS_CHICK,AT1A1_XENLA,NFKB1_HUMAN,NR0B1_HUMAN,APOE_ALLMI,LTOR1_XENTR,	25
GO:0006140	regulation of nucleotide metabolic process	Metabolic processes	25/2277	304/62406	0.00015516	0.0197803	0.0176852	PARP1_XENLA,IF6_XENLA,PPARD_HUMAN,S2533_BOVIN,SCO1_HUMAN,PARK7_CHICK,PHB1_CHICK,SIR6_HUMAN,CO72L_HUMAN,PDE12_BOVIN,FLCN_XENTR,OGT1_RAT,GIN1_HUMAN,CHERP_MOUSE,SIR6_HUMAN,DDIT4_XENLA,PPRC1_MOUSE,OGT1_RABIT,HIF1A_CHICK,GUC2A_HUMAN,RHOA_PONAB,MYC1_XENLA,NCOR1_XENTR,INSR_XENLA,NOS3_HUMAN,	25
GO:0072329	monocarboxylic acid catabolic process	Metabolic processes	24/2277	276/62406	8.9e-05	0.0155286	0.0138838	ECI1_HUMAN,ACADS_RAT,AK1A1_XENTR,AL3A2_MACFA,ABCD3_HUMAN,LPP60_MOUSE,CP4B1_MOUSE,PPARD_HUMAN,ABHGA_RAT,ECHD1_XENLA,PAHX_HUMAN,ECH1_RAT,GCDH_BOVIN,PEX13_RAT,S27A4_HUMAN,SASB_ANAPL,ETFB_MOUSE,BSCL2_BOVIN,HCDH_MOUSE,ECH1_RAT,THIC_RAT,S27A3_HUMAN,PEX5_XENLA,ECI2_HUMAN,	24
GO:2001022	positive regulation of response to DNA damage stimulus	DNA	23/2277	263/62406	0.000113323	0.0176668	0.0157955	NSE1_XENLA,PARP1_XENLA,SPRE1_XENTR,RNF8A_XENLA,UB2V2_CHICK,DDX5_HUMAN,NEMF_HUMAN,FMR1B_XENLA,XRCC1_MOUSE,CEBPG_BOVIN,APBB1_MOUSE,ATM_HUMAN,SIR1_MOUSE,MYC1_XENLA,Nan,DTX4_MOUSE,STEA3_HUMAN,MMS19_XENLA,STEA3_HUMAN,HMGB1_RAT,MD2L2_XENLA,BCLF1_HUMAN,Nan,	23
GO:0005976	polysaccharide metabolic process	Metabolic processes	23/2277	289/62406	0.000442319	0.0344361	0.0307886	WIPI1_XENLA,ATG5_BOVIN,PPR3C_XENLA,CHIA_RAT,WIPI2_CHICK,OGT1_RAT,IL6RB_HUMAN,PGM2_HUMAN,GYS1_RABIT,BECN1_XENLA,B3GN2_MOUSE,B3GN4_HUMAN,PREU1_PREIS,UGPA_HUMAN,OGT1_RABIT,ATG3_XENLA,MYC1_XENLA,ATG12_HUMAN,FAS_CHICK,B3GN3_HUMAN,GL8D1_BOVIN,CHIA_HUMAN,G6PC1_FELCA,	23
GO:0032204	regulation of telomere maintenance	DNA	23/2277	302/62406	0.000809042	0.0475716	0.0425327	YLPM1_RAT,DKC1_CHICK,PINX1_HUMAN,PARP1_XENLA,STN1_AQUCT,DHX36_BOVIN,SIR6_HUMAN,NBN_XENLA,XRCC1_MOUSE,SIR6_HUMAN,MRE11_XENLA,ROA1_PANTR,YLPM1_RAT,ATM_HUMAN,Nan,GNL3_XENTR,ATRX_PANTR,DCP2_MOUSE,TE2IP_XENLA,NAT10_HUMAN,MYC1_XENLA,FBX4_HUMAN,GNL3L_BOVIN,	23
GO:1903578	regulation of ATP metabolic process	Metabolic processes	22/2277	238/62406	7.04e-05	0.0147986	0.0132311	PARP1_XENLA,IF6_XENLA,PPARD_HUMAN,S2533_BOVIN,SCO1_HUMAN,PARK7_CHICK,PHB1_CHICK,SIR6_HUMAN,CO72L_HUMAN,PDE12_BOVIN,FLCN_XENTR,OGT1_RAT,CHERP_MOUSE,SIR6_HUMAN,DDIT4_XENLA,PPRC1_MOUSE,OGT1_RABIT,HIF1A_CHICK,RHOA_PONAB,MYC1_XENLA,NCOR1_XENTR,INSR_XENLA,	22
GO:0009062	fatty acid catabolic process	lipid Metabolic processes	22/2277	253/62406	0.000171118	0.0213268	0.0190678	ECI1_HUMAN,ACADS_RAT,AL3A2_MACFA,ABCD3_HUMAN,CP4B1_MOUSE,PPARD_HUMAN,ABHGA_RAT,ECHD1_XENLA,PAHX_HUMAN,ECH1_RAT,GCDH_BOVIN,PEX13_RAT,S27A4_HUMAN,SASB_ANAPL,ETFB_MOUSE,BSCL2_BOVIN,HCDH_MOUSE,ECH1_RAT,THIC_RAT,S27A3_HUMAN,PEX5_XENLA,ECI2_HUMAN,	22
GO:0048194	Golgi vesicle budding	Secretion	21/2277	210/62406	3.26e-05	0.00971891	0.00868947	SNAA_MOUSE,SEC12_HUMAN,USO1_MOUSE,SAR1A_PONAB,SC22B_XENTR,KC1DB_DANRE,TMEDA_BOVIN,TBC20_BOVIN,STX5_BOVIN,VAPB_BOVIN,SC31A_CHICK,SCAP_XENLA,S23IP_HUMAN,PIGM_XENTR,TMED2_CRIGR,TPPC2_XENTR,PPP6_RAT,KC1DB_DANRE,GOLP3_RAT,GOSR2_RAT,SC24C_HUMAN,	21
GO:0019395	fatty acid oxidation	lipid Metabolic processes	20/2277	185/62406	1.61e-05	0.00702227	0.00627846	ECI1_HUMAN,ACADS_RAT,AL3A2_MACFA,ABCD3_HUMAN,CYGB_HUMAN,PPARD_HUMAN,ECHD1_XENLA,PAHX_HUMAN,ECH1_RAT,GCDH_BOVIN,PEX13_RAT,PAQR2_MOUSE,ETFB_MOUSE,BSCL2_BOVIN,HCDH_MOUSE,ECH1_RAT,THIC_RAT,S27A3_HUMAN,PEX5_XENLA,ECI2_HUMAN,	20
GO:0071806	protein transmembrane transport	Secretion	20/2277	199/62406	4.62e-05	0.0119119	0.0106502	TOM70_HUMAN,GRPE1_BOVIN,PEX26_CRIGR,CH60_HUMAN,EXOC7_HUMAN,TIM23_XENTR,T10B_XENLA,HS90A_CHICK,TIM29_HUMAN,TI16B_XENLA,BL1S3_MOUSE,PEX13_RAT,HEAT6_XENLA,RTN2_XENLA,TIM22_XENTR,TOM40_XENTR,C2CD5_XENTR,PEX5_XENLA,PEX14_RAT,SC61G_XENLA,	20
GO:0070125	mitochondrial translational elongation	mitochondrial	20/2277	209/62406	9.16e-05	0.0157538	0.0140852	RM22_XENTR,CHCH1_MOUSE,RM49_MOUSE,ERAL1_MOUSE,RM45_XENLA,RT18A_HUMAN,RM04_BOVIN,EFTS_XENLA,RT27_HUMAN,RM02_HUMAN,AKIP_HUMAN,RT30_BOVIN,RM42_HUMAN,EFTU_BOVIN,RT06_BOVIN,RT07_XENLA,RM28_XENLA,RM17_BOVIN,RM48_MOUSE,RT26_MOUSE,	20
GO:0042158	lipoprotein biosynthetic process	lipid Metabolic processes	20/2277	231/62406	0.000349209	0.0319304	0.0285483	WIPI1_XENLA,PIGO_HUMAN,PIGS_RAT,ZDHC5_RAT,ZDH13_PONAB,ATG5_BOVIN,ZDHC7_MOUSE,PIGH_HUMAN,WIPI2_CHICK,ATG4B_XENLA,ZDH16_HUMAN,PIGM_XENTR,Nan,ATG4D_XENLA,PIGU_HUMAN,PIGL_MOUSE,Nan,ATG7_HUMAN,ATG12_HUMAN,APOE_ALLMI,	20
GO:0070126	mitochondrial translational termination	mitochondrial	19/2277	216/62406	0.000398028	0.0338255	0.0302426	MTRFR_HUMAN,RM22_XENTR,CHCH1_MOUSE,RM49_MOUSE,ERAL1_MOUSE,RM45_XENLA,RT18A_HUMAN,RM04_BOVIN,RT27_HUMAN,RM02_HUMAN,AKIP_HUMAN,RT30_BOVIN,RM42_HUMAN,RT06_BOVIN,RT07_XENLA,RM28_XENLA,RM17_BOVIN,RM48_MOUSE,RT26_MOUSE,	19
GO:0006901	vesicle coating	Secretion	18/2277	161/62406	2.67e-05	0.00890675	0.00796333	SNAA_MOUSE,SEC12_HUMAN,USO1_MOUSE,SC22B_XENTR,KC1DB_DANRE,TMEDA_BOVIN,TBC20_BOVIN,STX5_BOVIN,SC31A_CHICK,S23IP_HUMAN,PIGM_XENTR,TMED2_CRIGR,TPPC2_XENTR,PPP6_RAT,KC1DB_DANRE,GOSR2_RAT,SC24C_HUMAN,CLCB_RAT,	18
GO:0048208	COPII vesicle coating	Secretion	18/2277	169/62406	5.1e-05	0.0123027	0.0109996	SNAA_MOUSE,SEC12_HUMAN,USO1_MOUSE,SAR1A_PONAB,SC22B_XENTR,KC1DB_DANRE,TMEDA_BOVIN,TBC20_BOVIN,STX5_BOVIN,SC31A_CHICK,S23IP_HUMAN,PIGM_XENTR,TMED2_CRIGR,TPPC2_XENTR,PPP6_RAT,KC1DB_DANRE,GOSR2_RAT,SC24C_HUMAN,	18
GO:0000154	rRNA modification	DNA	16/2277	127/62406	1.67e-05	0.00702227	0.00627846	NOP58_HUMAN,DKC1_CHICK,Nan,NOP56_HUMAN,GAR1_XENTR,MRM2_MOUSE,NSUN3_HUMAN,NOP2_HUMAN,THUM1_MOUSE,NOP56_HUMAN,TFB2M_BOVIN,TR61B_HUMAN,NAT10_HUMAN,MRM3_XENLA,DIM1_HUMAN,SPB1_RAT,	16
GO:0061912	selective autophagy	autophagosome	13/2277	84/62406	1.1e-05	0.00558256	0.00499125	WIPI1_XENLA,RAB7A_MOUSE,ATG5_BOVIN,SQSTM_MOUSE,WIPI2_CHICK,GYS1_RABIT,BECN1_XENLA,WDFY3_HUMAN,Nan,ATG3_XENLA,AMRA1_HUMAN,ATG12_HUMAN,ATG13_XENTR,	13
GO:0044743	protein transmembrane import into intracellular organelle	Material transport	13/2277	119/62406	0.000421177	0.0344361	0.0307886	GRPE1_BOVIN,PEX26_CRIGR,CH60_HUMAN,TIM23_XENTR,HSP7C_RAT,TIM29_HUMAN,TI16B_XENLA,PEX13_RAT,HEAT6_XENLA,TIM22_XENTR,TOM40_XENTR,PEX5_XENLA,PEX14_RAT,	13
GO:0008320	protein transmembrane transporter activity	Material transport	12/2277	72/62406	1.09e-05	0.00558256	0.00499125	TOM70_HUMAN,TMEDA_BOVIN,TIM23_XENTR,T10B_XENLA,BL1S3_MOUSE,AP4M1_HUMAN,PEX13_RAT,HEAT6_XENLA,TIM22_XENTR,TOM40_XENTR,PEX14_RAT,SC61G_XENLA,	12
GO:0044754	autolysosome	autophagosome	11/2277	90/62406	0.000439294	0.0344361	0.0307886	NCO4B_XENLA,CLN3_CANLF,GBRAP_RAT,LAMP2_HUMAN,SQSTM_MOUSE,Nan,GBRL1_XENTR,MLP3B_HUMAN,PKHM2_MOUSE,MIOSA_XENLA,LAMP1_CHICK,	11
