# Supplementary material
Source: Research Square preprint supplement (doi:10.21203/rs.3.rs-9409886/v1)
Supplement: Supplementary file 8 [file be8cc41a7ffedef2d5b6759a.xlsx]

## Sheet: 两组差异检验统计表_DiffTwoGroup_NR_Genus
Name	FC-Mean(%)	FC-Sd(%)	FM-Mean(%)	FM-Sd(%)	Pvalue	Fold Change	Corrected pvalue	Lower ci	Upper ci	Effectsize	mean_cha	abs_mean_cha	log2fc	abs_log2fc
g__Breznakia	5.59642	5.58806	0.36216	0.2435	0.00125	15.4528	0.00855	3.231	7.334	5.234	5.23426	5.23426	3.9498	3.9498
g__Methanobrevibacter	0.39311	1.77925	4.66016	10.5427	0.4391	0.08436	0.5627	-11.65	0.29	-4.267	-4.26705	4.26705	-3.5673	3.5673
g__unclassified_p__Bacillota	0.26039	1.31324	3.5274	8.41295	0.4171	0.07382	0.5493	-9.191	0.1815	-3.267	-3.26701	3.26701	-3.75984	3.75984
g__Clostridium	9.17244	4.78837	6.61908	2.41594	0.136	1.38576	0.2363	0.3723	5.051	2.553	2.55336	2.55336	0.470677	0.470677
g__Kineothrix	0.30401	0.27884	2.20322	1.85174	0.00017	0.13799	0.00265	-3.054	-0.8309	-1.899	-1.89921	1.89921	-2.85736	2.85736
g__Lachnoclostridium	0.4046	0.24407	2.1933	1.14426	3e-05	0.18447	0.00136	-2.492	-1.088	-1.789	-1.7887	1.7887	-2.43854	2.43854
g__Vibrio	1.69686	2.88377	0.03081	0.0131	9e-05	55.0716	0.00187	0.6905	2.896	1.666	1.66605	1.66605	5.78324	5.78324
g__Anaerorhabdus	2.73964	3.36166	4.40203	5.57151	0.9549	0.62236	0.9735	-5.461	1.877	-1.662	-1.66239	1.66239	-0.684179	0.684179
g__Bacteroides	2.88856	3.02734	1.36886	1.42026	0.1803	2.11019	0.2939	0.1972	2.909	1.52	1.5197	1.5197	1.07737	1.07737
g__Hungatella	0.31645	0.16842	1.69206	0.96306	0.00013	0.18702	0.00224	-1.993	-0.7883	-1.376	-1.37561	1.37561	-2.41874	2.41874
g__Hafnia	0.00278	0.00283	1.13015	3.38325	1	0.00246	1	-3.383	0.00173	-1.127	-1.12737	1.12737	-8.66713	8.66713
g__Candidatus_Limiplasma	1.24057	0.85965	0.12857	0.11435	7e-05	9.64878	0.00163	0.8095	1.477	1.112	1.112	1.112	3.27035	3.27035
g__unclassified_c__Caudoviricetes	2.30118	2.20484	1.25635	1.29751	0.00973	1.83164	0.0359	-0.1557	2.23	1.045	1.04483	1.04483	0.873136	0.873136
g__Christensenella	1.5455	2.32254	0.52711	0.31938	0.5089	2.93202	0.6321	0.1956	2.109	1.018	1.01839	1.01839	1.55189	1.55189
g__Alistipes	1.13135	1.12484	0.11518	0.09341	0.00073	9.82227	0.00602	0.6189	1.491	1.016	1.01617	1.01617	3.29606	3.29606
g__Desulfovibrio	4.21642	4.1291	3.26402	2.57822	0.6104	1.29179	0.6972	-1.372	3.029	0.9524	0.9524	0.9524	0.369372	0.369372
g__Pseudomonas	0.95973	4.65404	0.04029	0.01992	0.6371	23.8191	0.7214	-0.00679	2.759	0.9195	0.91944	0.91944	4.57405	4.57405
g__Enterocloster	0.19273	0.10869	1.09533	0.58372	8e-05	0.17596	0.00168	-1.264	-0.5506	-0.9026	-0.9026	0.9026	-2.50668	2.50668
g__unclassified_f__Erysipelotrichaceae	0.84823	0.73338	1.73353	2.04375	0.1803	0.48931	0.2939	-2.373	0.1796	-0.8854	-0.8853	0.8853	-1.03118	1.03118
g__Photobacterium	0.83475	1.81496	0.00811	0.00385	6e-05	102.92	0.00163	0.2319	1.584	0.8267	0.82664	0.82664	6.68538	6.68538
g__Cetobacterium	0.83317	1.83219	0.01712	0.00962	8e-05	48.6717	0.00168	0.2393	1.668	0.816	0.81605	0.81605	5.60501	5.60501
g__Eisenbergiella	0.23794	0.14639	0.9904	0.64963	0.00013	0.24024	0.00224	-1.167	-0.3986	-0.7525	-0.75246	0.75246	-2.05745	2.05745
g__Faecalicatena	0.31645	0.33107	1.04321	0.63841	0.00023	0.30334	0.00312	-1.155	-0.3477	-0.7268	-0.72676	0.72676	-1.72099	1.72099
g__Plesiomonas	0.72792	2.52201	0.00179	0.00207	0.3958	407.673	0.5391	0.09725	1.807	0.7263	0.72613	0.72613	8.67127	8.67127
g__Hydrogenoanaerobacterium	0.30472	0.1569	1.02721	0.56948	0.00027	0.29664	0.00332	-1.102	-0.3728	-0.7225	-0.72249	0.72249	-1.75321	1.75321
g__Blautia	0.4747	0.20246	1.17873	0.54457	0.00064	0.40272	0.00547	-1.043	-0.3652	-0.704	-0.70403	0.70403	-1.31215	1.31215
g__Dorea	0.27496	0.17392	0.93515	0.54067	0.00015	0.29403	0.00241	-1.029	-0.352	-0.6602	-0.66019	0.66019	-1.76596	1.76596
g__Massilimicrobiota	0.72567	0.68906	0.10793	0.0751	0.0021	6.72376	0.01215	0.3748	0.8754	0.6177	0.61774	0.61774	2.74927	2.74927
g__Lacrimispora	0.19776	0.09351	0.77435	0.4373	0.00027	0.25538	0.00332	-0.867	-0.3024	-0.5767	-0.57659	0.57659	-1.96928	1.96928
g__Pseudoflavonifractor	0.3007	0.15433	0.85069	0.553	0.00389	0.35348	0.01761	-0.8996	-0.2179	-0.5499	-0.54999	0.54999	-1.5003	1.5003
g__Rikenella	0.5751	0.61112	0.03904	0.09867	0.00023	14.7305	0.00312	0.3041	0.7777	0.536	0.53606	0.53606	3.88074	3.88074
g__Anaerotruncus	0.70572	0.59267	1.24156	0.53208	0.02241	0.56841	0.0641	-0.9105	-0.1238	-0.5359	-0.53584	0.53584	-0.814996	0.814996
g__Akkermansia	0.29646	1.10297	0.81684	1.71813	0.1462	0.36293	0.2507	-1.802	0.4697	-0.5204	-0.52038	0.52038	-1.46224	1.46224
g__unclassified_f__Methanobacteriaceae	0.01546	0.03449	0.50171	1.14536	0.3958	0.03082	0.5391	-1.294	-0.02398	-0.4863	-0.48625	0.48625	-5.01999	5.01999
g__Paraclostridium	0.5939	0.74025	0.11096	0.18169	0.00042	5.35257	0.00421	0.2045	0.8289	0.4829	0.48294	0.48294	2.42023	2.42023
g__Intestinimonas	0.20819	0.11671	0.69056	0.48326	0.00389	0.30148	0.01761	-0.7931	-0.1846	-0.4824	-0.48237	0.48237	-1.72987	1.72987
g__Romboutsia	0.53554	0.3387	0.06293	0.01959	4e-05	8.50942	0.00144	0.3506	0.6012	0.4726	0.47261	0.47261	3.08906	3.08906
g__Cucumispora	0.46361	1.72617	0.00198	0.00515	1	233.769	1	-0.00166	1.229	0.4616	0.46163	0.46163	7.86894	7.86894
g__Mucispirillum	0.17666	0.24789	0.63751	1.57607	0.5585	0.2771	0.6824	-1.553	0.1571	-0.4609	-0.46085	0.46085	-1.85152	1.85152
g__Nocardioides	0.17384	0.52368	0.63253	1.03913	0.01208	0.27483	0.0421	-1.226	0.09202	-0.4587	-0.45869	0.45869	-1.86339	1.86339
g__Merdibacter	0.55159	0.54249	0.09544	0.0883	0.00696	5.77929	0.0278	0.252	0.6806	0.4562	0.45615	0.45615	2.53089	2.53089
g__Candidatus_Avirikenella	0.43871	0.62491	0.00355	0.00581	3e-05	123.411	0.00144	0.2225	0.7218	0.4351	0.43516	0.43516	6.94733	6.94733
g__unclassified_f__Nitrososphaeraceae	0.13764	0.27218	0.57053	0.91015	0.01343	0.24125	0.0458	-1.115	-0.02899	-0.4329	-0.43289	0.43289	-2.0514	2.0514
g__Amedibacillus	0.46609	0.4253	0.87816	1.24935	0.6643	0.53076	0.7467	-1.29	0.2195	-0.4122	-0.41207	0.41207	-0.913868	0.913868
g__Amedibacterium	0.57667	0.49743	0.98531	0.97622	0.2655	0.58527	0.3985	-1.056	0.1203	-0.4086	-0.40864	0.40864	-0.772826	0.772826
g__Candidatus_Faecisoma	0.42364	0.60624	0.01755	0.0253	0.00055	24.1386	0.00496	0.2135	0.6569	0.4061	0.40609	0.40609	4.59327	4.59327
g__Acetatifactor	0.21623	0.19658	0.609	0.41933	0.00438	0.35506	0.01926	-0.668	-0.1452	-0.3927	-0.39277	0.39277	-1.49387	1.49387
g__Roseburia	0.23296	0.20939	0.62491	0.36834	0.00305	0.37279	0.01511	-0.6374	-0.1573	-0.392	-0.39195	0.39195	-1.42356	1.42356
g__Thomasclavelia	0.98991	0.77763	1.37986	1.34721	0.6371	0.7174	0.7214	-1.325	0.4783	-0.39	-0.38995	0.38995	-0.47915	0.47915
g__Candidatus_Fimihabitans	0.41353	0.63145	0.03138	0.05304	0.00031	13.1783	0.00368	0.187	0.6473	0.3821	0.38215	0.38215	3.72009	3.72009
g__Holdemania	0.59809	0.73253	0.22106	0.12556	0.2345	2.70551	0.3594	0.125	0.7522	0.377	0.37703	0.37703	1.4359	1.4359
g__Mucinivorans	0.53014	0.58285	0.15392	0.4346	0.0011	3.44419	0.00796	0.02955	0.6954	0.3762	0.37622	0.37622	1.78416	1.78416
g__Angelakisella	0.29245	0.18948	0.64748	0.41808	0.01492	0.45168	0.04976	-0.6338	-0.1031	-0.3551	-0.35503	0.35503	-1.14663	1.14663
g__Candidatus_Methanorudis	0.00346	0.01703	0.3526	0.80473	0.00079	0.0098	0.00636	-0.9128	-0.01091	-0.3491	-0.34914	0.34914	-6.673	6.673
g__Ruthenibacterium	0.82128	0.75622	1.16365	0.62347	0.1087	0.70578	0.2	-0.8144	0.1519	-0.3424	-0.34237	0.34237	-0.50271	0.50271
g__Methanobacterium	0.01041	0.01152	0.34866	0.78701	0.1929	0.02985	0.3114	-0.8772	-0.01652	-0.3383	-0.33825	0.33825	-5.06613	5.06613
g__Oscillibacter	0.42959	0.19716	0.76179	0.3534	0.00438	0.56392	0.01926	-0.5663	-0.09662	-0.3323	-0.3322	0.3322	-0.826438	0.826438
g__Proteocatella	0.34852	0.64359	0.01641	0.00966	0.0011	21.2347	0.00796	0.1208	0.6011	0.3321	0.33211	0.33211	4.40835	4.40835
g__Robinsoniella	0.12461	0.0646	0.45406	0.21869	0.00015	0.27444	0.00241	-0.4771	-0.2072	-0.3294	-0.32945	0.32945	-1.86544	1.86544
g__Ligaoa	0.06023	0.03911	0.38766	0.25478	6e-05	0.15536	0.00163	-0.4878	-0.1743	-0.3274	-0.32743	0.32743	-2.68631	2.68631
g__Extibacter	0.08308	0.068	0.40963	0.24253	7e-05	0.20283	0.00163	-0.4996	-0.1883	-0.3266	-0.32655	0.32655	-2.30166	2.30166
g__Anaerocolumna	0.21334	0.11378	0.52845	0.31147	0.00185	0.40371	0.01129	-0.5241	-0.1395	-0.3151	-0.31511	0.31511	-1.30861	1.30861
g__Aeromonas	0.31905	1.258	0.00947	0.00949	0.2061	33.6833	0.329	0.01732	0.8521	0.3096	0.30958	0.30958	5.07396	5.07396
g__Velocimicrobium	0.01674	0.01666	0.32461	0.52907	0.00096	0.05158	0.00718	-0.6748	-0.06426	-0.3079	-0.30787	0.30787	-4.27704	4.27704
g__Bilophila	2.08072	1.9539	1.77384	0.74668	0.7199	1.173	0.7948	-0.5927	1.188	0.3069	0.30688	0.30688	0.230203	0.230203
g__Eubacterium	0.78369	0.34185	1.0852	0.411	0.02725	0.72216	0.07381	-0.557	0.03204	-0.3015	-0.30151	0.30151	-0.46961	0.46961
g__Mediterraneibacter	0.15899	0.11951	0.4561	0.21984	0.00036	0.34858	0.00401	-0.4495	-0.1643	-0.2971	-0.29711	0.29711	-1.52044	1.52044
g__Mailhella	0.74165	0.65739	0.48043	0.47339	0.4617	1.54372	0.5864	-0.1295	0.6284	0.2612	0.26122	0.26122	0.626411	0.626411
g__Traorella	0.33133	0.26828	0.07027	0.06266	0.00125	4.7153	0.00855	0.1589	0.3861	0.2611	0.26106	0.26106	2.23735	2.23735
g__Candidatus_Avidesulfovibrio	0.58563	0.62138	0.3258	0.28234	0.3551	1.79755	0.4952	-0.03072	0.5863	0.2598	0.25983	0.25983	0.846032	0.846032
g__Candidatus_Onthocola	0.26882	0.29775	0.0134	0.00974	0.00073	20.0585	0.00602	0.1493	0.3725	0.2554	0.25542	0.25542	4.32614	4.32614
g__Odoribacter	0.30022	0.28833	0.05236	0.06117	0.00238	5.73386	0.01325	0.1375	0.3703	0.2479	0.24786	0.24786	2.51951	2.51951
g__Acholeplasma	0.2653	0.40577	0.01919	0.01816	0.00048	13.8286	0.00451	0.121	0.435	0.2461	0.24611	0.24611	3.78958	3.78958
g__Obesumbacterium	0.00052	0.00081	0.24368	0.73051	0.9248	0.00213	0.9497	-0.7304	0.00061	-0.2432	-0.24316	0.24316	-8.87493	8.87493
g__Enterococcus	0.14382	0.05249	0.38525	0.4361	0.02472	0.3733	0.0684	-0.5241	-0.01879	-0.2414	-0.24143	0.24143	-1.42159	1.42159
g__Mycobacterium	0.26515	0.33125	0.03055	0.03222	0.00305	8.67921	0.01511	0.1206	0.3862	0.2346	0.2346	0.2346	3.11756	3.11756
g__Agathobaculum	0.08475	0.04584	0.31831	0.32645	0.00143	0.26625	0.00934	-0.4493	-0.06744	-0.2336	-0.23356	0.23356	-1.90915	1.90915
g__Beduini	0.13134	0.10468	0.36378	0.28016	0.02028	0.36105	0.05938	-0.4023	-0.05824	-0.2324	-0.23244	0.23244	-1.46973	1.46973
g__Flavonifractor	0.20488	0.11447	0.42358	0.25556	0.01343	0.48369	0.0458	-0.377	-0.0581	-0.2187	-0.2187	0.2187	-1.04785	1.04785
g__Candidatus_Pelethosoma	0.23801	0.42525	0.02034	0.03208	0.00621	11.6986	0.02533	0.09167	0.4079	0.2176	0.21767	0.21767	3.54826	3.54826
g__Mycoplasma	0.29434	0.26982	0.07846	0.08492	0.0011	3.75128	0.00796	0.1076	0.3335	0.2159	0.21588	0.21588	1.90738	1.90738
g__Paludihabitans	0.31757	0.44661	0.5316	0.44297	0.1462	0.59739	0.2507	-0.5569	0.1245	-0.214	-0.21403	0.21403	-0.743255	0.743255
g__Longicatena	0.51236	0.45583	0.72252	0.76594	0.3958	0.70912	0.5391	-0.795	0.2087	-0.2101	-0.21016	0.21016	-0.495898	0.495898
g__Brachyspira	0.2549	0.52993	0.05198	0.08283	0.01208	4.90423	0.0421	0.03905	0.4605	0.2029	0.20292	0.20292	2.29403	2.29403
g__Solobacterium	0.27777	0.27006	0.07693	0.0362	0.0027	3.61093	0.01418	0.1015	0.3207	0.2009	0.20084	0.20084	1.85237	1.85237
g__Lawsonibacter	0.09741	0.05805	0.29193	0.15151	0.00042	0.33366	0.00421	-0.2871	-0.09172	-0.1945	-0.19452	0.19452	-1.58355	1.58355
g__Paeniclostridium	0.20391	0.33718	0.01255	0.03209	0.0011	16.2535	0.00796	0.08491	0.3366	0.1913	0.19136	0.19136	4.02267	4.02267
g__Acetoanaerobium	0.19637	0.35728	0.00567	0.00412	0.00023	34.6061	0.00312	0.07631	0.3487	0.1907	0.1907	0.1907	5.11295	5.11295
g__Ureaplasma	0.20928	0.30207	0.02398	0.04251	0.00162	8.72579	0.01018	0.08079	0.3003	0.1853	0.1853	0.1853	3.12529	3.12529
g__Candidatus_Methanovirga	0.00136	0.0043	0.18504	0.4211	0.03969	0.00736	0.099	-0.4797	-0.00638	-0.1837	-0.18368	0.18368	-7.08608	7.08608
g__Spraguea	0.17893	0.68131	0	0	0.03518	0	0.09003	0.00102	0.4811	0.1789	0.17893	0.17893	#NUM!	#NUM!
g__Mycolicibacterium	0.19558	0.28721	0.02428	0.02707	0.0027	8.05589	0.01418	0.07336	0.2818	0.1713	0.1713	0.1713	3.01004	3.01004
g__Paenibacillus	0.28087	0.13266	0.45134	0.14758	0.00493	0.62231	0.02124	-0.2747	-0.06559	-0.1705	-0.17047	0.17047	-0.684295	0.684295
g__Desulforamulus	0.18975	0.19146	0.0226	0.01276	0.00017	8.39794	0.00265	0.099	0.2488	0.1672	0.16715	0.16715	3.07004	3.07004
g__Dictyocoela	0.16444	0.64463	0.00058	0.00077	0.9533	284.414	0.9735	0.00043	0.4102	0.1639	0.16386	0.16386	8.15185	8.15185
g__Dielma	0.3607	0.27086	0.19835	0.14829	0.08593	1.8185	0.1797	0.02044	0.2991	0.1624	0.16235	0.16235	0.862749	0.862749
g__Candidatus_Ventrisoma	0.00391	0.00603	0.16562	0.16939	2e-05	0.02363	0.00117	-0.2856	-0.06295	-0.1617	-0.16171	0.16171	-5.40324	5.40324
g__unclassified_p__Candidatus_Gracilibacteria	0.16164	0.36158	0.00105	0.001	4e-05	153.706	0.00149	0.05595	0.3178	0.1606	0.16059	0.16059	7.26403	7.26403
g__Longibaculum	0.43553	0.41777	0.27827	0.21491	0.4391	1.5651	0.5627	-0.05264	0.3862	0.1573	0.15726	0.15726	0.646255	0.646255
g__Parabacteroides	0.87692	1.10216	0.72037	0.97747	0.3751	1.21731	0.5166	-0.619	0.8486	0.1566	0.15655	0.15655	0.283697	0.283697
g__Aminipila	0.1792	0.17453	0.33443	0.38233	0.136	0.53582	0.2363	-0.4415	0.0582	-0.1553	-0.15523	0.15523	-0.90018	0.90018
g__Faecalicoccus	0.2229	0.21434	0.06907	0.05876	0.02999	3.22713	0.07983	0.06805	0.2382	0.1538	0.15383	0.15383	1.69025	1.69025
g__Hamiltosporidium	0.15363	0.55202	0.00037	0.00076	1	411.518	1	0.00087	0.3964	0.1533	0.15326	0.15326	8.68481	8.68481
g__Escherichia	0.05759	0.06712	0.2079	0.5005	0.3958	0.277	0.5391	-0.4779	0.04645	-0.1503	-0.15031	0.15031	-1.85204	1.85204
g__Anaerotignum	0.70711	0.50081	0.56008	0.31102	0.4171	1.26251	0.5493	-0.1294	0.4203	0.1471	0.14703	0.14703	0.336295	0.336295
g__Emergencia	0.21761	0.34753	0.07209	0.03177	0.2821	3.0187	0.4177	0.03507	0.2985	0.1455	0.14552	0.14552	1.59393	1.59393
g__Cylindrospermum	8e-05	0.00011	0.14446	0.42036	0.00523	0.00054	0.0221	-0.4254	-0.00033	-0.1444	-0.14438	0.14438	-10.8548	10.8548
g__Erysipelothrix	0.19815	0.11291	0.05873	0.02382	0.00027	3.37405	0.00332	0.09438	0.1904	0.1394	0.13942	0.13942	1.75448	1.75448
g__Faecalimicrobium	0.1481	0.23154	0.00959	0.00631	3e-05	15.4504	0.00144	0.06528	0.2319	0.1385	0.13851	0.13851	3.94957	3.94957
g__unclassified_d__Viruses	0.2485	0.18237	0.11028	0.07274	0.00143	2.25338	0.00934	0.05769	0.2253	0.1382	0.13822	0.13822	1.17209	1.17209
g__Millionella	0.15201	0.16104	0.01422	0.03665	0.00027	10.6889	0.00332	0.07334	0.2037	0.1378	0.13779	0.13779	3.41804	3.41804
g__Holdemanella	0.20288	0.15249	0.07008	0.0483	0.00344	2.89505	0.01618	0.06976	0.2006	0.1328	0.1328	0.1328	1.53359	1.53359
g__Butyricicoccus	0.15098	0.0865	0.28374	0.17367	0.02028	0.53211	0.05938	-0.2591	-0.02635	-0.1328	-0.13276	0.13276	-0.910204	0.910204
g__Microbacterium	0.05011	0.1881	0.18217	0.22076	0.01208	0.27507	0.0421	-0.287	0.00331	-0.1321	-0.13206	0.13206	-1.86213	1.86213
g__Actinomycetospora	0.14042	0.57818	0.01646	0.02929	0.5585	8.53261	0.6824	-0.01347	0.372	0.124	0.12396	0.12396	3.09299	3.09299
g__Malacoplasma	0.14196	0.19206	0.01863	0.02661	0.00238	7.6191	0.01325	0.05045	0.2005	0.1233	0.12333	0.12333	2.92962	2.92962
g__Faecalimonas	0.03401	0.02336	0.15667	0.16527	0.00055	0.21707	0.00496	-0.2391	-0.04313	-0.1227	-0.12266	0.12266	-2.20377	2.20377
g__Gregsiragusavirus	0.12146	0.28206	0	0	1e-05	0	0.00092	0.0321	0.2379	0.1214	0.12146	0.12146	#NUM!	#NUM!
g__Ventrimonas	0.0036	0.0026	0.12392	0.10611	1e-05	0.02905	0.001	-0.2048	-0.06797	-0.1203	-0.12032	0.12032	-5.10532	5.10532
g__Tidjanibacter	0.12517	0.14381	0.0053	0.01039	0.00027	23.6355	0.00332	0.07239	0.1801	0.1199	0.11987	0.11987	4.56288	4.56288
g__Candidatus_Coprosoma	0.12591	0.24161	0.00619	0.00967	0.0021	20.3339	0.01215	0.05054	0.2227	0.1197	0.11972	0.11972	4.34582	4.34582
g__Terrisporobacter	0.16916	0.10853	0.05071	0.01481	6e-05	3.33611	0.00163	0.08089	0.165	0.1185	0.11845	0.11845	1.73817	1.73817
g__Hespellia	0.06583	0.03012	0.18351	0.11065	0.0011	0.35872	0.00796	-0.1971	-0.05468	-0.1177	-0.11768	0.11768	-1.47907	1.47907
g__Astathelohania	0.11709	0.4081	5e-05	0.00016	0.04688	2256.64	0.1139	0.00062	0.297	0.117	0.11704	0.11704	11.14	11.14
g__Fretibacterium	0.17898	0.26231	0.06206	0.10194	0.22	2.88388	0.3471	0.0018	0.2302	0.1169	0.11692	0.11692	1.52801	1.52801
g__Citrobacter	0.00851	0.00705	0.12482	0.22119	0.1087	0.06814	0.2	-0.2667	-0.00289	-0.1163	-0.11631	0.11631	-3.87535	3.87535
g__Candidatus_Methanoflexus	0.00247	0.004	0.11851	0.26911	0.1005	0.02084	0.1908	-0.3061	-0.00239	-0.116	-0.11604	0.11604	-5.5845	5.5845
g__Coprococcus	0.06695	0.04015	0.18278	0.17792	0.00493	0.36626	0.02124	-0.2449	-0.0309	-0.1158	-0.11583	0.11583	-1.44906	1.44906
g__Candidatus_Scybalousia_(ex_Gilroy_et_al._2021)	0.14591	0.17755	0.03072	0.0446	0.00305	4.74988	0.01511	0.04787	0.1965	0.1152	0.11519	0.11519	2.24789	2.24789
g__Chlamydia	0.11417	0.17934	0.00223	0.00147	0.00036	51.278	0.00401	0.05551	0.1896	0.1119	0.11194	0.11194	5.68027	5.68027
g__Coprobacillus	0.81813	0.94201	0.70626	0.51083	0.6919	1.1584	0.771	-0.3572	0.5913	0.1118	0.11187	0.11187	0.212134	0.212134
g__Tyzzerella	0.07171	0.02367	0.18096	0.17769	0.0027	0.39625	0.01418	-0.2334	-0.0247	-0.1093	-0.10925	0.10925	-1.33552	1.33552
g__Bradyrhizobium	0.20936	0.58885	0.10091	0.13424	0.157	2.0747	0.2656	-0.08695	0.394	0.1084	0.10845	0.10845	1.0529	1.0529
g__Bariatricus	0.05338	0.02414	0.15443	0.10926	0.00073	0.34566	0.00602	-0.1796	-0.0411	-0.1011	-0.10105	0.10105	-1.53257	1.53257
g__Anaerostipes	0.09592	0.02674	0.19581	0.05504	3e-05	0.48986	0.00144	-0.1372	-0.06517	-0.0999	-0.09989	0.09989	-1.02956	1.02956
g__Anaerosporobacter	0.12512	0.04914	0.22339	0.18362	0.03297	0.56007	0.08592	-0.2319	0.00315	-0.09828	-0.09827	0.09827	-0.836321	0.836321
g__Ruminiclostridium	0.38279	0.46379	0.28698	0.11118	0.7199	1.33387	0.7948	-0.07183	0.3111	0.09582	0.09581	0.09581	0.415618	0.415618
g__Butyrivibrio	0.07569	0.05092	0.17061	0.09237	0.00554	0.44362	0.02294	-0.1575	-0.03836	-0.09492	-0.09492	0.09492	-1.1726	1.1726
g__Methyloceanibacter	0.11275	0.11347	0.01789	0.03405	0.00048	6.30274	0.00451	0.05023	0.1421	0.09486	0.09486	0.09486	2.65598	2.65598
g__Gemmiger	0.14079	0.1014	0.23485	0.10219	0.00871	0.5995	0.03279	-0.1685	-0.02133	-0.09406	-0.09406	0.09406	-0.738168	0.738168
g__Murimonas	0.03594	0.0197	0.12692	0.06109	0.00023	0.28319	0.00312	-0.1296	-0.05232	-0.09098	-0.09098	0.09098	-1.82016	1.82016
g__Floccifex	0.10489	0.09654	0.01395	0.01312	0.00143	7.52071	0.00934	0.05695	0.1312	0.09095	0.09094	0.09094	2.91087	2.91087
g__Nitratidesulfovibrio	0.46673	0.45661	0.37637	0.27338	0.8651	1.24011	0.9028	-0.1531	0.3351	0.09038	0.09036	0.09036	0.310468	0.310468
g__Filifactor	0.09584	0.17719	0.00582	0.00225	0.0027	16.471	0.01418	0.03158	0.1641	0.09002	0.09002	0.09002	4.04185	4.04185
g__Nosema	0.08991	0.32051	0.00051	0.0009	0.6397	174.703	0.7241	0.00017	0.2399	0.0894	0.0894	0.0894	7.44876	7.44876
g__Soehngenia	0.09225	0.09587	0.003	0.00158	0.00011	30.7223	0.00205	0.05294	0.1274	0.08925	0.08925	0.08925	4.94121	4.94121
g__Caproiciproducens	0.1161	0.05293	0.2047	0.09974	0.00305	0.56717	0.01511	-0.1538	-0.03011	-0.0886	-0.0886	0.0886	-0.818147	0.818147
g__Vairimorpha	0.08872	0.35219	0.00043	0.00081	0.9842	204.644	0.9931	0.00011	0.242	0.0883	0.08829	0.08829	7.67697	7.67697
g__Pseudoloma	0.08756	0.36636	6e-05	0.00018	0.07794	1432.49	0.1671	0.00042	0.2448	0.08749	0.0875	0.0875	10.4843	10.4843
g__Klebsiella	0.02588	0.05849	0.11274	0.18599	0.07925	0.22955	0.1677	-0.2095	0.01564	-0.08687	-0.08686	0.08686	-2.12312	2.12312
g__Hyphomicrobium	0.09145	0.12656	0.00559	0.00843	0.00013	16.3729	0.00224	0.04426	0.1432	0.08587	0.08586	0.08586	4.03324	4.03324
g__Gallalistipes	0.08878	0.09206	0.003	0.00475	4e-05	29.5785	0.00149	0.05221	0.1211	0.08578	0.08578	0.08578	4.88648	4.88648
g__Shewanella	0.08782	0.22696	0.00397	0.00246	0.00185	22.0946	0.01129	0.01867	0.1795	0.08384	0.08385	0.08385	4.46562	4.46562
g__Chroococcidiopsis	0.00087	0.00232	0.083	0.24634	0.485	0.01043	0.609	-0.2469	0.00084	-0.08213	-0.08213	0.08213	-6.58312	6.58312
g__Parablautia	0.03341	0.02412	0.11487	0.07662	0.0021	0.2908	0.01215	-0.1336	-0.03839	-0.08146	-0.08146	0.08146	-1.7819	1.7819
g__Dysosmobacter	0.05721	0.03066	0.13857	0.08763	0.00125	0.41287	0.00855	-0.1417	-0.03008	-0.08135	-0.08136	0.08136	-1.27624	1.27624
g__Vavraia	0.08139	0.31453	7e-05	0.00021	0.3377	1106.37	0.476	0.00021	0.2341	0.08134	0.08132	0.08132	10.1116	10.1116
g__Diplocloster	0.04909	0.02535	0.12983	0.06257	0.00064	0.37814	0.00547	-0.1217	-0.04261	-0.08074	-0.08074	0.08074	-1.40301	1.40301
g__Lachnotalea	0.04271	0.06401	0.12068	0.06894	0.00048	0.35392	0.00451	-0.1271	-0.02949	-0.07796	-0.07797	0.07797	-1.4985	1.4985
g__Enterobacter	0.01238	0.0212	0.08863	0.12938	0.00438	0.13964	0.01926	-0.1648	-0.00426	-0.07626	-0.07625	0.07625	-2.84022	2.84022
g__Mobilisporobacter	0.02946	0.01631	0.1054	0.08186	0.00238	0.2795	0.01325	-0.1315	-0.02999	-0.07594	-0.07594	0.07594	-1.83908	1.83908
g__Anaerofustis	0.106	0.06714	0.03103	0.00963	0.0002	3.41649	0.00292	0.05127	0.1013	0.07498	0.07497	0.07497	1.77251	1.77251
g__Candidatus_Onthousia	0.12684	0.13419	0.05205	0.06529	0.07925	2.43703	0.1677	0.00698	0.1405	0.0748	0.07479	0.07479	1.28512	1.28512
g__unclassified_d__Archaea	0.02173	0.0236	0.09646	0.19613	0.1683	0.22525	0.282	-0.2173	0.00818	-0.07474	-0.07473	0.07473	-2.1504	2.1504
g__Herbinix	0.09418	0.03243	0.16859	0.09426	0.00389	0.55862	0.01761	-0.1357	-0.01868	-0.07443	-0.07441	0.07441	-0.840061	0.840061
g__Evtepia	0.10997	0.09682	0.18435	0.14834	0.2061	0.59654	0.329	-0.1797	0.02138	-0.07438	-0.07438	0.07438	-0.745309	0.745309
g__Subdoligranulum	0.14862	0.12248	0.22052	0.10918	0.04346	0.67398	0.1068	-0.1483	0.0153	-0.07191	-0.0719	0.0719	-0.569222	0.569222
g__Candidatus_Metalachnospira	0.03725	0.02238	0.1091	0.06076	0.00013	0.34145	0.00224	-0.1119	-0.03808	-0.07184	-0.07185	0.07185	-1.55025	1.55025
g__Sphingomicrobium	0.00529	0.0102	0.07703	0.15034	0.22	0.06867	0.3471	-0.1825	-0.00101	-0.07174	-0.07174	0.07174	-3.86418	3.86418
g__Butyricimonas	0.0903	0.07822	0.01916	0.0174	0.0027	4.71342	0.01418	0.04226	0.1057	0.07115	0.07114	0.07114	2.23677	2.23677
g__Prevotella	0.14415	0.09161	0.07335	0.02814	0.05193	1.9652	0.1211	0.03139	0.1094	0.07081	0.0708	0.0708	0.974676	0.974676
g__unclassified_p__Euryarchaeota	0.00478	0.00342	0.07538	0.16432	0.2345	0.06344	0.3594	-0.1856	-0.00033	-0.0706	-0.0706	0.0706	-3.97846	3.97846
g__Luxibacter	0.02343	0.03055	0.09396	0.06198	0.00017	0.2494	0.00265	-0.1147	-0.03556	-0.07051	-0.07053	0.07053	-2.00347	2.00347
g__Staphylococcus	0.1087	0.06246	0.03931	0.01444	0.00042	2.76539	0.00421	0.04541	0.09508	0.06939	0.06939	0.06939	1.46748	1.46748
g__Trachipleistophora	0.06929	0.26252	0	0	0.02469	0	0.0684	0.00032	0.192	0.06929	0.06929	0.06929	#NUM!	#NUM!
g__Candidatus_Faecimonas	0.12904	0.12808	0.06042	0.08836	0.0362	2.13585	0.09186	-0.00451	0.1396	0.06863	0.06862	0.06862	1.09481	1.09481
g__Flavobacterium	0.09191	0.06566	0.02348	0.02014	0.00036	3.91504	0.00401	0.04131	0.09953	0.06843	0.06843	0.06843	1.96903	1.96903
g__Sphingomonas	0.12617	0.55741	0.05796	0.10443	0.7484	2.17681	0.8117	-0.08943	0.3247	0.06822	0.06821	0.06821	1.12222	1.12222
g__unclassified_o__Crassvirales	0.07565	0.08321	0.00762	0.01206	0.00027	9.92945	0.00332	0.03606	0.1008	0.06803	0.06803	0.06803	3.31171	3.31171
g__Nitratireductor	0.06948	0.14147	0.00149	0.00165	8e-05	46.519	0.00168	0.02206	0.1274	0.06799	0.06799	0.06799	5.53975	5.53975
g__Massilicoli	0.13115	0.12101	0.06412	0.05466	0.136	2.0453	0.2363	0.01189	0.1252	0.06703	0.06703	0.06703	1.03231	1.03231
g__Cryobacterium	0.00255	0.00644	0.06884	0.18921	0.0362	0.03704	0.09186	-0.1935	0.00036	-0.06629	-0.06629	0.06629	-4.75477	4.75477
g__Fournierella	0.11771	0.09423	0.18327	0.09197	0.05665	0.64226	0.13	-0.1289	0.00404	-0.06556	-0.06556	0.06556	-0.638771	0.638771
g__Methanothermobacter	0.00029	0.00036	0.06571	0.15054	0.4833	0.00435	0.609	-0.1672	-0.00146	-0.06542	-0.06542	0.06542	-7.84477	7.84477
g__Schaedlerella	0.03754	0.0244	0.10268	0.04803	0.00064	0.36556	0.00547	-0.09798	-0.03264	-0.06515	-0.06514	0.06514	-1.45182	1.45182
g__Faecalitalea	0.10089	0.09178	0.03588	0.02262	0.0362	2.81164	0.09186	0.03054	0.1049	0.065	0.06501	0.06501	1.49141	1.49141
g__Candidatus_Paracaedibacter	0.07384	0.1303	0.00887	0.02439	0.03285	8.32057	0.08592	0.01975	0.1225	0.06496	0.06497	0.06497	3.05668	3.05668
g__Marasmitruncus	0.13667	0.10847	0.20079	0.09357	0.07925	0.68066	0.1677	-0.1361	0.00989	-0.06411	-0.06412	0.06412	-0.554994	0.554994
g__Elizabethkingia	0.06537	0.22319	0.0017	0.00239	0.00621	38.4589	0.02533	0.00712	0.1664	0.06367	0.06367	0.06367	5.26525	5.26525
g__Anaeromicropila	0.02618	0.01183	0.08782	0.07089	0.00084	0.29807	0.00655	-0.1097	-0.02309	-0.06164	-0.06164	0.06164	-1.74628	1.74628
g__Paracoccus	0.06385	0.27218	0.00275	0.00541	0.00048	23.2179	0.00451	0.00375	0.1702	0.06109	0.0611	0.0611	4.53717	4.53717
g__Otoolea	0.00657	0.0065	0.06697	0.03956	3e-05	0.09815	0.00136	-0.08755	-0.03624	-0.0604	-0.0604	0.0604	-3.34887	3.34887
g__Brotaphodocola	0.00203	0.00349	0.06117	0.05155	1e-05	0.03325	0.00114	-0.09392	-0.03272	-0.05913	-0.05914	0.05914	-4.9105	4.9105
g__Succinispira	0.00795	0.00887	0.06696	0.08052	0.0011	0.11876	0.00796	-0.1124	-0.01301	-0.059	-0.05901	0.05901	-3.07388	3.07388
g__Sellimonas	0.03388	0.01528	0.09287	0.05852	0.00125	0.36483	0.00855	-0.1004	-0.02523	-0.059	-0.05899	0.05899	-1.4547	1.4547
g__Anaerofilum	0.12639	0.10402	0.18465	0.0968	0.07301	0.68446	0.1575	-0.129	0.01629	-0.05827	-0.05826	0.05826	-0.546962	0.546962
g__Candidatus_Egerieousia	0.07745	0.1089	0.01958	0.05252	0.00324	3.95575	0.01553	0.00558	0.1121	0.05787	0.05787	0.05787	1.98395	1.98395
g__Rickettsia	0.06239	0.09903	0.0051	0.00633	0.00871	12.2364	0.03279	0.02617	0.09838	0.05729	0.05729	0.05729	3.61311	3.61311
g__Desulfomicrobium	0.12123	0.10996	0.06415	0.03577	0.3172	1.88973	0.4515	0.01114	0.1045	0.05708	0.05708	0.05708	0.91818	0.91818
g__Candidatus_Pelethocola	0.02372	0.01079	0.07985	0.04574	4e-05	0.29701	0.00144	-0.08482	-0.03033	-0.05613	-0.05613	0.05613	-1.75142	1.75142
g__Candidatus_Merdivicinus	0.06157	0.03158	0.11671	0.06551	0.00973	0.52753	0.0359	-0.09623	-0.01495	-0.05515	-0.05514	0.05514	-0.922675	0.922675
g__Merdimmobilis	0.11497	0.07905	0.1701	0.12028	0.2497	0.67589	0.3786	-0.137	0.02628	-0.05511	-0.05513	0.05513	-0.56514	0.56514
g__Brevinema	0.1964	0.80759	0.14141	0.27392	0.9248	1.3889	0.9497	-0.2549	0.4134	0.05498	0.05499	0.05499	0.473943	0.473943
g__Anncaliia	0.05534	0.20687	0.0006	0.00083	0.3022	91.7025	0.4428	-5e-05	0.1305	0.05474	0.05474	0.05474	6.51889	6.51889
g__Encephalitozoon	0.05448	0.18789	6e-05	0.00017	0.1135	964.074	0.2076	0.00049	0.1362	0.05443	0.05442	0.05442	9.913	9.913
g__Aminomonas	0.05661	0.12804	0.00245	0.00427	0.1264	23.1367	0.2251	0.01545	0.112	0.05416	0.05416	0.05416	4.53211	4.53211
g__Culturomica	0.05977	0.11971	0.00566	0.00648	0.00042	10.557	0.00421	0.02258	0.1048	0.05411	0.05411	0.05411	3.40013	3.40013
g__Coprobacter	0.06166	0.07332	0.00806	0.01024	0.00125	7.64638	0.00855	0.02718	0.08513	0.0536	0.0536	0.0536	2.93478	2.93478
g__Acetivibrio	0.1969	0.10346	0.24925	0.26514	0.7199	0.78996	0.7948	-0.2472	0.07731	-0.05236	-0.05235	0.05235	-0.340148	0.340148
g__Azospirillum	0.07184	0.06499	0.02007	0.01906	0.00779	3.57999	0.03007	0.02329	0.08097	0.05178	0.05177	0.05177	1.83996	1.83996
g__Dysgonomonas	0.0928	0.07331	0.0412	0.03783	0.02725	2.25221	0.07381	0.01425	0.08996	0.0516	0.0516	0.0516	1.17134	1.17134
g__Paludibacter	0.07165	0.05904	0.02055	0.01342	0.00143	3.48652	0.00934	0.02754	0.07643	0.0511	0.0511	0.0511	1.80179	1.80179
g__Treponema	0.40174	0.47369	0.45202	0.34468	0.4171	0.88877	0.5493	-0.3275	0.235	-0.05035	-0.05028	0.05028	-0.170118	0.170118
g__Chakrabartyella	0.06826	0.0467	0.01826	0.00998	0.00073	3.73848	0.00602	0.0313	0.07036	0.05	0.05	0.05	1.90245	1.90245
g__Pseudodesulfovibrio	0.08615	0.07655	0.03627	0.02273	0.07925	2.37512	0.1677	0.01937	0.08271	0.04987	0.04988	0.04988	1.248	1.248
g__Tubulinosema	0.04985	0.19156	0	0	0.02469	0	0.0684	0.00032	0.1335	0.04985	0.04985	0.04985	#NUM!	#NUM!
g__Acutalibacter	0.20495	0.1771	0.25385	0.23477	0.3958	0.80737	0.5391	-0.2217	0.08823	-0.0489	-0.0489	0.0489	-0.308698	0.308698
g__Basidiobolus	0.00084	0.00171	0.0492	0.09315	0.00775	0.01703	0.03007	-0.1097	-0.00489	-0.04836	-0.04836	0.04836	-5.87578	5.87578
g__Microlunatus	0.02602	0.11591	0.07411	0.11624	0.00779	0.35112	0.03007	-0.1403	0.03099	-0.04809	-0.04809	0.04809	-1.50996	1.50996
g__Scatolibacter	0.09551	0.09747	0.04783	0.02175	0.2345	1.99694	0.3594	0.0108	0.09251	0.04768	0.04768	0.04768	0.997791	0.997791
g__Pseudolabrys	0.06815	0.08436	0.02073	0.0352	0.02999	3.28738	0.07983	0.00631	0.08844	0.04742	0.04742	0.04742	1.71694	1.71694
g__Pluralibacter	0.0009	0.00131	0.0482	0.13657	0.03297	0.01877	0.08592	-0.1389	-0.00031	-0.0473	-0.0473	0.0473	-5.73543	5.73543
g__Copranaerobaculum	0.39959	0.35142	0.44685	0.42498	0.9248	0.89423	0.9497	-0.3696	0.2389	-0.04727	-0.04726	0.04726	-0.161282	0.161282
g__Pygmaiobacter	0.18403	0.109	0.23118	0.08675	0.07925	0.79602	0.1677	-0.1115	0.03236	-0.04716	-0.04715	0.04715	-0.329123	0.329123
g__Anaerovorax	0.15829	0.10018	0.20534	0.11118	0.2345	0.77087	0.3594	-0.1269	0.03597	-0.04704	-0.04705	0.04705	-0.375441	0.375441
g__Fusicatenibacter	0.01577	0.01305	0.06212	0.04515	0.00023	0.25383	0.00312	-0.07731	-0.02321	-0.04635	-0.04635	0.04635	-1.97807	1.97807
g__Neobittarella	0.02155	0.01386	0.06777	0.04347	0.00042	0.31795	0.00421	-0.07515	-0.02071	-0.04622	-0.04622	0.04622	-1.65313	1.65313
g__Agathobacter	0.07272	0.03899	0.1184	0.06057	0.00973	0.61422	0.0359	-0.08675	-0.00865	-0.04569	-0.04568	0.04568	-0.703173	0.703173
g__Actinoplanes	0.04139	0.18967	0.08674	0.1586	0.01343	0.4771	0.0458	-0.1791	0.06924	-0.04536	-0.04535	0.04535	-1.06764	1.06764
g__Lactonifactor	0.03926	0.02045	0.08446	0.04438	0.00096	0.46484	0.00718	-0.07524	-0.01716	-0.0452	-0.0452	0.0452	-1.10519	1.10519
g__Tannerella	0.0721	0.05437	0.02691	0.0203	0.00779	2.67957	0.03007	0.02138	0.07225	0.04519	0.04519	0.04519	1.422	1.422
g__Legionella	0.05066	0.08096	0.00614	0.003	0.08593	8.25537	0.1797	0.01848	0.07897	0.04453	0.04452	0.04452	3.04533	3.04533
g__Qiania	0.01688	0.01152	0.06025	0.03479	0.00125	0.2802	0.00855	-0.06801	-0.02179	-0.04337	-0.04337	0.04337	-1.83547	1.83547
g__Muricomes	0.01793	0.01881	0.06095	0.03612	0.0002	0.29416	0.00292	-0.0675	-0.02109	-0.04302	-0.04302	0.04302	-1.76533	1.76533
g__Brucesealvirus	0.04249	0.08454	0	0	2e-05	0	0.00119	0.01619	0.07871	0.04249	0.04249	0.04249	#NUM!	#NUM!
g__Ruminococcus	0.97933	0.43087	0.93779	0.37277	0.5089	1.04429	0.6321	-0.2594	0.3147	0.04151	0.04154	0.04154	0.0625224	0.0625224
g__Yanshouia	0.09628	0.09425	0.05543	0.05918	0.2821	1.73702	0.4177	-0.00937	0.09119	0.04085	0.04085	0.04085	0.796614	0.796614
g__unclassified_o__Nitrosopumilales	0.001	0.0018	0.0416	0.07038	7e-05	0.02409	0.00163	-0.08793	-0.00857	-0.0406	-0.0406	0.0406	-5.37542	5.37542
g__Aminivibrio	0.06595	0.08107	0.0258	0.03516	0.06173	2.55607	0.1388	0.00211	0.07873	0.04014	0.04015	0.04015	1.35393	1.35393
g__Zongyangia	0.0865	0.06666	0.04641	0.01546	0.06173	1.86366	0.1388	0.01572	0.06865	0.04009	0.04009	0.04009	0.898139	0.898139
g__Tannockella	0.09947	0.05523	0.13954	0.17415	0.8062	0.71283	0.8549	-0.1507	0.05576	-0.04007	-0.04007	0.04007	-0.48837	0.48837
g__Phocaeicola	0.12115	0.10734	0.08154	0.08975	0.4171	1.48582	0.5493	-0.03301	0.107	0.03961	0.03961	0.03961	0.571259	0.571259
g__Eggerthella	0.08871	0.07955	0.12812	0.15113	0.8949	0.6924	0.9258	-0.1423	0.0498	-0.03941	-0.03941	0.03941	-0.530322	0.530322
g__Candidatus_Enterousia	0.03972	0.06686	0.00047	0.00069	0.00125	83.6925	0.00855	0.01675	0.06359	0.03925	0.03925	0.03925	6.38703	6.38703
g__Massilibacillus	0.04756	0.10421	0.009	0.00498	0.2655	5.28509	0.3985	0.00499	0.08182	0.03855	0.03856	0.03856	2.40193	2.40193
g__Sporofaciens	0.02451	0.01344	0.06293	0.01727	1e-05	0.38942	0.001	-0.05117	-0.02705	-0.03842	-0.03842	0.03842	-1.3606	1.3606
g__Acinetobacter	0.06558	0.11218	0.0274	0.01133	0.6104	2.3935	0.6972	0.00339	0.08835	0.03818	0.03818	0.03818	1.25912	1.25912
g__Edhazardia	0.03775	0.13846	0	0	0.04943	0	0.1173	0.00027	0.09968	0.03775	0.03775	0.03775	#NUM!	#NUM!
g__Pseudonocardia	0.10056	0.3708	0.06293	0.13618	0.485	1.59786	0.609	-0.1122	0.238	0.03761	0.03763	0.03763	0.676141	0.676141
g__Scandinavium	0.00011	0.00015	0.03766	0.10975	1	0.00302	1	-0.1109	-2e-05	-0.03755	-0.03755	0.03755	-8.37124	8.37124
g__Candidatus_Coprovivens	0.04374	0.05635	0.0066	0.00907	0.01492	6.63081	0.04976	0.01837	0.05839	0.03714	0.03714	0.03714	2.72919	2.72919
g__Tissierella	0.13211	0.04457	0.09502	0.02977	0.01833	1.39044	0.05526	0.01239	0.06265	0.03708	0.03709	0.03709	0.475541	0.475541
g__Lachnospira	0.04306	0.0285	0.07966	0.04362	0.00554	0.54051	0.02294	-0.06752	-0.00629	-0.03661	-0.0366	0.0366	-0.887607	0.887607
g__Claveliimonas	0.01664	0.0171	0.05317	0.04164	0.00162	0.313	0.01018	-0.06398	-0.01214	-0.03652	-0.03653	0.03653	-1.67577	1.67577
g__Deferribacter	0.01026	0.01738	0.04677	0.11234	0.8949	0.21939	0.9258	-0.1136	0.00855	-0.03651	-0.03651	0.03651	-2.18843	2.18843
g__Pedococcus	0.00224	0.00323	0.03839	0.08188	0.00438	0.05828	0.01926	-0.09299	-0.00397	-0.03616	-0.03615	0.03615	-4.10086	4.10086
g__Candidatus_Odyssella	0.03864	0.07118	0.00292	0.00799	0.0027	13.2251	0.01418	0.01413	0.06649	0.03572	0.03572	0.03572	3.7252	3.7252
g__Dubosiella	0.04791	0.02347	0.01229	0.00487	3e-05	3.8989	0.00136	0.02694	0.04477	0.03562	0.03562	0.03562	1.96307	1.96307
g__Lawsonia	0.12519	0.11491	0.08983	0.03901	0.8949	1.3936	0.9258	-0.01504	0.08375	0.03535	0.03536	0.03536	0.478817	0.478817
g__Konateibacter	0.02017	0.01562	0.05517	0.02928	0.00143	0.36555	0.00934	-0.05534	-0.0167	-0.035	-0.035	0.035	-1.45186	1.45186
g__Sakamotonia	0.00354	0.00509	0.03822	0.0324	4e-05	0.09259	0.00144	-0.05495	-0.01572	-0.03468	-0.03468	0.03468	-3.433	3.433
g__Candidatus_Fimivivens	0.24583	0.20111	0.21187	0.12213	0.9248	1.1603	0.9497	-0.0829	0.1368	0.03397	0.03396	0.03396	0.214498	0.214498
g__Intestinibacter	0.06681	0.04203	0.03286	0.01217	0.00779	2.03334	0.03007	0.01637	0.05212	0.03395	0.03395	0.03395	1.02385	1.02385
g__Fusobacterium	0.13008	0.05945	0.09656	0.03238	0.1173	1.34711	0.2127	0.0019	0.06484	0.03353	0.03352	0.03352	0.429868	0.429868
g__Salmonella	0.03691	0.04656	0.07017	0.08024	0.6104	0.52604	0.6972	-0.09056	0.0178	-0.03326	-0.03326	0.03326	-0.926756	0.926756
g__Wolbachia	0.03685	0.06079	0.00369	0.00535	0.02028	9.98648	0.05938	0.01431	0.06064	0.03316	0.03316	0.03316	3.31998	3.31998
g__Rhodoplanes	0.04176	0.07323	0.0087	0.0161	0.05193	4.79789	0.1211	0.00724	0.06959	0.03305	0.03306	0.03306	2.2624	2.2624
g__unclassified_o__Methanobacteriales	9e-05	0.00032	0.03313	0.07577	0.00269	0.00273	0.01418	-0.0861	-0.00276	-0.03304	-0.03304	0.03304	-8.51688	8.51688
g__Mycoplasmoides	0.03695	0.05733	0.00451	0.00765	0.00344	8.1872	0.01618	0.01259	0.05489	0.03244	0.03244	0.03244	3.03337	3.03337
g__Caedibacter	0.03284	0.05309	0.00049	0.00087	0.00141	66.4811	0.00934	0.01501	0.05424	0.03234	0.03235	0.03235	6.05487	6.05487
g__Amorphoplanes	0.00837	0.03729	0.04062	0.07158	0.00583	0.20619	0.02404	-0.08111	0.01124	-0.03224	-0.03225	0.03225	-2.27795	2.27795
g__Solidesulfovibrio	0.07151	0.06478	0.03956	0.02749	0.2655	1.80788	0.3985	0.00332	0.0645	0.03195	0.03195	0.03195	0.854299	0.854299
g__Magnetospirillum	0.03684	0.07625	0.00489	0.00382	0.00871	7.53185	0.03279	0.00966	0.0671	0.03195	0.03195	0.03195	2.913	2.913
g__Barnesiella	0.03645	0.03467	0.00463	0.00568	0.00096	7.8645	0.00718	0.01937	0.04693	0.03182	0.03182	0.03182	2.97536	2.97536
g__Merdimonas	0.0099	0.00829	0.04153	0.02537	0.00017	0.23843	0.00265	-0.04739	-0.01625	-0.03163	-0.03163	0.03163	-2.06836	2.06836
g__Cellulosilyticum	0.08421	0.02451	0.11582	0.0412	0.02725	0.72708	0.07381	-0.06022	-0.00601	-0.03161	-0.03161	0.03161	-0.459814	0.459814
g__Faecalibacterium	0.10686	0.05877	0.13776	0.05452	0.1087	0.77573	0.2	-0.0711	0.01074	-0.0309	-0.0309	0.0309	-0.366373	0.366373
g__Peptacetobacter	0.05016	0.03125	0.01942	0.00802	0.00143	2.58248	0.00934	0.01821	0.04543	0.03074	0.03074	0.03074	1.36876	1.36876
g__Filomicrobium	0.03169	0.04242	0.00095	0.00168	2e-05	33.3833	0.00119	0.01686	0.05152	0.03074	0.03074	0.03074	5.06106	5.06106
g__Negativicoccus	0.03057	0.03051	0.00023	0.00023	3e-05	135.221	0.00136	0.01922	0.0417	0.03035	0.03034	0.03034	7.07918	7.07918
g__Candidatus_Coprocola	0.00934	0.00726	0.03955	0.04115	0.00162	0.23613	0.01018	-0.05842	-0.00816	-0.03022	-0.03021	0.03021	-2.08235	2.08235
g__Candidatus_Onthosoma	0.03292	0.03573	0.00271	0.0031	0.00162	12.1291	0.01018	0.01855	0.04544	0.0302	0.03021	0.03021	3.60041	3.60041
g__Bulleidia	0.03567	0.03115	0.00561	0.00324	0.00027	6.36028	0.00332	0.01868	0.04386	0.03006	0.03006	0.03006	2.66909	2.66909
g__Negativibacillus	0.03939	0.02147	0.06919	0.02913	0.00696	0.56932	0.0278	-0.04832	-0.00948	-0.02979	-0.0298	0.0298	-0.812688	0.812688
g__Marvinbryantia	0.01027	0.00828	0.03963	0.02512	0.00015	0.25922	0.00241	-0.04642	-0.0166	-0.02936	-0.02936	0.02936	-1.94775	1.94775
g__Catenibacterium	0.06266	0.0464	0.03363	0.02279	0.06173	1.86324	0.1388	0.00717	0.05272	0.02903	0.02903	0.02903	0.897814	0.897814
g__Caproicibacterium	0.02374	0.01457	0.05247	0.02109	0.0011	0.45235	0.00796	-0.04132	-0.01447	-0.02874	-0.02873	0.02873	-1.14449	1.14449
g__Mucor	0.03167	0.16019	0.00338	0.00414	0.00154	9.36675	0.00995	-0.00508	0.09239	0.02828	0.02829	0.02829	3.22755	3.22755
g__Streptococcus	0.07945	0.02271	0.05139	0.02309	0.00389	1.54581	0.01761	0.01108	0.04529	0.02806	0.02806	0.02806	0.628363	0.628363
g__Sharpea	0.03631	0.03718	0.00867	0.00782	0.02725	4.19001	0.07381	0.01369	0.04349	0.02765	0.02764	0.02764	2.06695	2.06695
g__Vittaforma	0.02748	0.10819	0	0	0.09404	0	0.1907	0.00017	0.08145	0.02748	0.02748	0.02748	#NUM!	#NUM!
g__Anaerobium	0.0293	0.01561	0.05652	0.03056	0.00305	0.51833	0.01511	-0.04836	-0.00729	-0.02723	-0.02722	0.02722	-0.948057	0.948057
g__Micromonospora	0.0116	0.03894	0.03876	0.05853	0.00779	0.29928	0.03007	-0.06798	0.00762	-0.02716	-0.02716	0.02716	-1.74043	1.74043
g__Phytophthora	0.00135	0.00255	0.02849	0.03758	0.00012	0.04729	0.00219	-0.05149	-0.00717	-0.02715	-0.02714	0.02714	-4.40232	4.40232
g__Endomicrobium	0.03715	0.05673	0.01006	0.01194	0.2061	3.69269	0.329	0.00587	0.05276	0.02709	0.02709	0.02709	1.88467	1.88467
g__Candidatus_Aphodocola	0.03421	0.06	0.0072	0.00664	0.1173	4.75034	0.2127	0.00809	0.0532	0.02701	0.02701	0.02701	2.24803	2.24803
g__Exiguobacterium	0.03435	0.02906	0.00756	0.00676	0.00185	4.54172	0.01129	0.01551	0.03794	0.02678	0.02679	0.02679	2.18324	2.18324
g__Suilimivivens	0.01171	0.01176	0.03829	0.03303	0.01654	0.30593	0.05218	-0.04728	-0.0062	-0.02658	-0.02658	0.02658	-1.70873	1.70873
g__Candidatus_Avidehalobacter	0.03792	0.05274	0.01204	0.01584	0.1173	3.14995	0.2127	0.00452	0.05073	0.02588	0.02588	0.02588	1.65533	1.65533
g__Micavibrio	0.02737	0.04205	0.00157	0.00282	0.01085	17.4622	0.03929	0.0109	0.04431	0.02581	0.0258	0.0258	4.12616	4.12616
g__Sebaldella	0.01247	0.01187	0.03824	0.06099	0.03297	0.32626	0.08592	-0.06783	-0.00032	-0.02576	-0.02577	0.02577	-1.61591	1.61591
g__Petralouisia	0.00614	0.00567	0.03177	0.01977	0.00042	0.19314	0.00421	-0.03817	-0.01349	-0.02563	-0.02563	0.02563	-2.37228	2.37228
g__Faecalispora	0.08754	0.03737	0.11285	0.04422	0.08593	0.77573	0.1797	-0.0558	0.00659	-0.02531	-0.02531	0.02531	-0.366373	0.366373
g__Beecentumtrevirus	0.02486	0.05843	0	0	2e-05	0	0.00119	0.00631	0.0519	0.02486	0.02486	0.02486	#NUM!	#NUM!
g__Neglectibacter	0.25575	0.24396	0.28052	0.31585	0.6104	0.91173	0.6972	-0.2799	0.1701	-0.02478	-0.02477	0.02477	-0.133321	0.133321
g__Cetraspora	0.02499	0.12712	0.00044	0.00108	0.2922	56.4941	0.4308	-0.00085	0.07481	0.02455	0.02455	0.02455	5.82003	5.82003
g__Maridesulfovibrio	0.03888	0.03525	0.01435	0.00978	0.05193	2.70892	0.1211	0.01078	0.03971	0.02453	0.02453	0.02453	1.43772	1.43772
g__Schistosoma	0.00083	0.00227	0.02523	0.0648	0.4914	0.03287	0.6164	-0.06875	0.00056	-0.0244	-0.0244	0.0244	-4.92708	4.92708
g__Agromyces	0.03005	0.12722	0.05423	0.07795	0.00871	0.55411	0.03279	-0.09511	0.04801	-0.02418	-0.02418	0.02418	-0.851756	0.851756
g__Candidatus_Scybalomonas	0.01879	0.00886	0.0429	0.03011	0.0021	0.4381	0.01215	-0.0457	-0.00735	-0.02411	-0.02411	0.02411	-1.19067	1.19067
g__Calditerrivibrio	0.00694	0.01106	0.03103	0.07644	0.7058	0.22373	0.7854	-0.07713	0.00642	-0.02409	-0.02409	0.02409	-2.16017	2.16017
g__Bacillus	0.25024	0.07387	0.2262	0.06973	0.6643	1.1063	0.7467	-0.02708	0.07236	0.02404	0.02404	0.02404	0.145743	0.145743
g__Candidatus_Caccovicinus	0.00217	0.00166	0.02617	0.01546	2e-05	0.08298	0.00119	-0.03423	-0.01536	-0.02399	-0.024	0.024	-3.59109	3.59109
g__Crenobacter	0.00204	0.0021	0.02518	0.07447	0.03297	0.08103	0.08592	-0.07334	0.00235	-0.02315	-0.02314	0.02314	-3.6254	3.6254
g__Enterocytozoon	0.02286	0.08177	5e-05	9e-05	0.49	462.461	0.6147	0.00013	0.05776	0.02281	0.02281	0.02281	8.85319	8.85319
g__Providencia	0.02844	0.11215	0.00569	0.00188	0.6643	4.99788	0.7467	-0.00142	0.06805	0.02275	0.02275	0.02275	2.32132	2.32132
g__Caedimonas	0.02396	0.03674	0.00174	0.00327	0.01655	13.7667	0.05218	0.0094	0.03949	0.02223	0.02222	0.02222	3.78312	3.78312
g__Desulfitobacterium	0.05234	0.03213	0.07453	0.0316	0.06173	0.70224	0.1388	-0.04469	0.00029	-0.02219	-0.02219	0.02219	-0.509964	0.509964
g__Tepidibacter	0.0515	0.06319	0.02932	0.03893	0.1006	1.75673	0.1908	-0.01198	0.05663	0.02219	0.02218	0.02218	0.812892	0.812892
g__Fusibacter	0.02614	0.01425	0.04825	0.0282	0.01655	0.54177	0.05218	-0.04312	-0.00605	-0.02211	-0.02211	0.02211	-0.884248	0.884248
g__Candidatus_Galacturonibacter	0.01793	0.01688	0.04003	0.02794	0.00344	0.448	0.01618	-0.04399	-0.00648	-0.0221	-0.0221	0.0221	-1.15843	1.15843
g__Gigaspora	0.02314	0.11755	0.00111	0.00214	0.00422	20.8206	0.01899	-0.00224	0.06891	0.02203	0.02203	0.02203	4.37994	4.37994
g__Candidatus_Caccenecus	0.02587	0.0177	0.00388	0.004	0.00023	6.66763	0.00312	0.01542	0.02973	0.02199	0.02199	0.02199	2.73717	2.73717
g__Junduvirus	0.02819	0.09994	0.00649	0.01947	0.01637	4.34321	0.05218	-0.00996	0.06696	0.0217	0.0217	0.0217	2.11876	2.11876
g__Hepatospora	0.02186	0.10427	0.00039	0.00111	0.7126	56.0697	0.7917	-0.00059	0.06379	0.02147	0.02147	0.02147	5.80915	5.80915
g__Candidatus_Paracaedimonas	0.0225	0.03808	0.00113	0.00303	0.02452	19.8627	0.0684	0.00886	0.03722	0.02137	0.02137	0.02137	4.31199	4.31199
g__Streptomyces	0.07457	0.2427	0.05339	0.0562	0.3358	1.39675	0.4736	-0.05796	0.1327	0.02117	0.02118	0.02118	0.482074	0.482074
g__Candidatus_Scatovivens	0.03067	0.01685	0.00961	0.01699	0.00125	3.19147	0.00855	0.00745	0.03136	0.02106	0.02106	0.02106	1.67422	1.67422
g__Zhenhengia	0.01209	0.00646	0.033	0.026	0.00096	0.36628	0.00718	-0.03946	-0.00721	-0.02091	-0.02091	0.02091	-1.44898	1.44898
g__unclassified_f__Parvoviridae	0.02144	0.10844	0.0006	0.0012	0.8009	35.7509	0.8538	-0.00103	0.06403	0.02084	0.02084	0.02084	5.15991	5.15991
g__Candidatus_Faecenecus	0.02603	0.03354	0.0052	0.00847	0.00824	5.00291	0.03152	0.00825	0.03587	0.02082	0.02083	0.02083	2.32277	2.32277
g__Craterilacuibacter	0.00022	0.00051	0.02069	0.06205	0.05514	0.01083	0.1281	-0.06198	0.00035	-0.02047	-0.02047	0.02047	-6.52882	6.52882
g__Caproicibacter	0.0287	0.01562	0.04909	0.0208	0.00554	0.58458	0.02294	-0.03264	-0.00536	-0.02039	-0.02039	0.02039	-0.774528	0.774528
g__Selenomonas	0.03982	0.04518	0.01956	0.00995	0.07925	2.03563	0.1677	0.00467	0.04028	0.02026	0.02026	0.02026	1.02548	1.02548
g__Guopingia	0.03777	0.03324	0.01753	0.00573	0.1087	2.15499	0.2	0.0078	0.0334	0.02024	0.02024	0.02024	1.10768	1.10768
g__Enteropsectra	0.02561	0.11527	0.00565	0.01281	0.02484	4.5354	0.06869	-0.00967	0.07092	0.01996	0.01996	0.01996	2.18123	2.18123
g__Ordospora	0.01964	0.07053	0	0	0.04943	0	0.1173	0.00013	0.05118	0.01964	0.01964	0.01964	#NUM!	#NUM!
g__Candidatus_Merdimorpha	0.01977	0.04455	0.00017	0.00028	0.00012	116.316	0.00214	0.00616	0.03925	0.0196	0.0196	0.0196	6.86191	6.86191
g__unclassified_c__Candidatus_Hydrothermia	5e-05	0.00011	0.01963	0.04342	0.00032	0.00266	0.0037	-0.04963	-0.0019	-0.01958	-0.01958	0.01958	-8.55436	8.55436
g__Bacilliculturomica	0.04861	0.03631	0.06818	0.0433	0.1462	0.71305	0.2507	-0.04988	0.00966	-0.01957	-0.01957	0.01957	-0.487925	0.487925
g__Aliivibrio	0.0203	0.05828	0.00079	0.00162	0.00055	25.744	0.00496	0.00482	0.045	0.01951	0.01951	0.01951	4.68616	4.68616
g__Candidatus_Cottocaccamicrobium	0.00622	0.00602	0.02569	0.01417	0.0002	0.24195	0.00292	-0.02861	-0.00929	-0.01947	-0.01947	0.01947	-2.04722	2.04722
g__Alkalibaculum	0.017	0.01244	0.0363	0.01115	0.00055	0.46833	0.00496	-0.02773	-0.01105	-0.0193	-0.0193	0.0193	-1.0944	1.0944
g__Deferrivibrio	0.00432	0.00801	0.02347	0.06072	0.6234	0.18412	0.7108	-0.06087	0.00399	-0.01914	-0.01915	0.01915	-2.44128	2.44128
g__Amanita	0.01919	0.09767	8e-05	0.00011	0.1061	247.729	0.1964	-0.00011	0.05747	0.01911	0.01911	0.01911	7.95262	7.95262
g__Inediibacterium	0.02832	0.02451	0.00923	0.0075	0.00696	3.06718	0.0278	0.00895	0.02843	0.01909	0.01909	0.01909	1.61691	1.61691
g__Proteiniclasticum	0.03837	0.02877	0.01929	0.01046	0.02241	1.98888	0.0641	0.00685	0.03213	0.01908	0.01908	0.01908	0.991956	0.991956
g__Proteiniphilum	0.02791	0.02131	0.00889	0.00615	0.01085	3.13998	0.03929	0.01018	0.02845	0.01902	0.01902	0.01902	1.65076	1.65076
g__Variimorphobacter	0.01033	0.0081	0.02935	0.01552	0.00185	0.35199	0.01129	-0.02919	-0.00886	-0.01902	-0.01902	0.01902	-1.50639	1.50639
g__Caldicoprobacter	0.02884	0.01242	0.00983	0.00274	6e-05	2.93519	0.00163	0.01382	0.02403	0.01902	0.01901	0.01901	1.55345	1.55345
g__Salaquimonas	0.01904	0.03383	0.00014	0.0002	3e-05	135.365	0.00144	0.00789	0.03333	0.0189	0.0189	0.0189	7.08071	7.08071
g__Candidatus_Onthovivens	0.02914	0.02313	0.01027	0.00257	0.01655	2.83772	0.05218	0.01055	0.02884	0.01887	0.01887	0.01887	1.50473	1.50473
g__unclassified_p__Candidatus_Bathyarchaeota	0.02174	0.01652	0.00301	0.0022	3e-05	7.23277	0.00144	0.01266	0.02582	0.01874	0.01873	0.01873	2.85455	2.85455
g__Chryseobacterium	0.02944	0.01967	0.01078	0.00785	0.01208	2.73046	0.0421	0.00991	0.02781	0.01866	0.01866	0.01866	1.44914	1.44914
g__Cohnella	0.02297	0.014	0.04163	0.01966	0.01492	0.55187	0.04976	-0.03091	-0.00475	-0.01866	-0.01866	0.01866	-0.8576	0.8576
g__Massiliimalia	0.11744	0.06269	0.09883	0.05986	0.5334	1.18828	0.6582	-0.02502	0.06238	0.0186	0.01861	0.01861	0.248875	0.248875
g__Candidatus_Nucleicultrix	0.01982	0.03183	0.00162	0.00445	0.00845	12.229	0.03218	0.0068	0.03127	0.01819	0.0182	0.0182	3.61224	3.61224
g__Qingrenia	0.02257	0.03174	0.00439	0.00297	0.0362	5.1412	0.09186	0.00777	0.03089	0.01818	0.01818	0.01818	2.36211	2.36211
g__Oliverpabstia	0.00929	0.00787	0.02729	0.01616	0.00162	0.34051	0.01018	-0.02855	-0.00702	-0.018	-0.018	0.018	-1.55423	1.55423
g__Gaiella	0.01229	0.03433	0.03017	0.06313	0.5089	0.40719	0.6321	-0.06537	0.01583	-0.01789	-0.01788	0.01788	-1.29623	1.29623
g__Acetobacter	0.02334	0.02381	0.00546	0.00425	0.00344	4.27167	0.01618	0.00872	0.02814	0.01788	0.01788	0.01788	2.0948	2.0948
g__Oceanidesulfovibrio	0.02397	0.02603	0.00615	0.00484	0.01833	3.89792	0.05526	0.00857	0.02871	0.01782	0.01782	0.01782	1.9627	1.9627
g__Massilibacteroides	0.02226	0.02587	0.00444	0.00625	0.00305	5.01394	0.01511	0.0084	0.02895	0.01782	0.01782	0.01782	2.32594	2.32594
g__Candidatus_Avoscillospira	0.0126	0.01227	0.03028	0.03018	0.0362	0.41617	0.09186	-0.03775	-0.00074	-0.01768	-0.01768	0.01768	-1.26476	1.26476
g__Geovibrio	0.00708	0.00742	0.02472	0.0604	0.4391	0.2864	0.5627	-0.05954	0.00564	-0.01764	-0.01764	0.01764	-1.8039	1.8039
g__Aminobacterium	0.02958	0.04348	0.01206	0.01725	0.6104	2.45305	0.6972	-0.00234	0.0382	0.01752	0.01752	0.01752	1.29458	1.29458
g__Sporanaerobium	0.01881	0.01161	0.03626	0.02094	0.01492	0.51875	0.04976	-0.03047	-0.00385	-0.01745	-0.01745	0.01745	-0.946889	0.946889
g__Candidatus_Pullilachnospira	0.00507	0.00471	0.02251	0.01136	0.00017	0.2253	0.00265	-0.02476	-0.00966	-0.01744	-0.01744	0.01744	-2.15008	2.15008
g__Candidatus_Caccousia	0.02691	0.00936	0.04432	0.01946	0.00554	0.60732	0.02294	-0.02967	-0.00425	-0.0174	-0.01741	0.01741	-0.719471	0.719471
g__Desulfosporosinus	0.07293	0.03531	0.09015	0.01701	0.157	0.80899	0.2656	-0.03548	-0.00116	-0.01723	-0.01722	0.01722	-0.305806	0.305806
g__Rhizophagus	0.02919	0.13408	0.01197	0.01396	0.0038	2.439	0.01747	-0.01624	0.07731	0.01722	0.01722	0.01722	1.28629	1.28629
g__Nematocida	0.02108	0.07843	0.00395	0.01005	0.1739	5.33799	0.2862	-0.00708	0.04966	0.01713	0.01713	0.01713	2.4163	2.4163
g__Flintibacter	0.0133	0.00921	0.03038	0.01343	0.00143	0.43772	0.00934	-0.02613	-0.00816	-0.01708	-0.01708	0.01708	-1.19192	1.19192
g__Mediterranea	0.02226	0.01896	0.00533	0.00643	0.00493	4.17612	0.02124	0.0087	0.02535	0.01693	0.01693	0.01693	2.06216	2.06216
g__Holospora	0.01747	0.02662	0.00057	0.00096	0.00437	30.6167	0.01926	0.00855	0.02881	0.0169	0.0169	0.0169	4.93625	4.93625
g__Caloramator	0.03687	0.00989	0.02008	0.0161	0.0021	1.83576	0.01215	0.00629	0.02607	0.01679	0.01679	0.01679	0.876377	0.876377
g__Phascolarctobacterium	0.05154	0.01662	0.06828	0.02974	0.3751	0.75484	0.5166	-0.03714	0.00095	-0.01674	-0.01674	0.01674	-0.405757	0.405757
g__Candidatus_Cryptobacteroides	0.01973	0.01655	0.00303	0.00381	0.00073	6.52029	0.00602	0.01023	0.02352	0.0167	0.0167	0.0167	2.70494	2.70494
g__Parasporobacterium	0.00837	0.00516	0.02496	0.01207	0.00064	0.33533	0.00547	-0.0238	-0.00912	-0.01659	-0.01659	0.01659	-1.57635	1.57635
g__Hydrogeniiclostridium	0.01477	0.00963	0.03113	0.01195	0.00143	0.47455	0.00934	-0.02414	-0.0072	-0.01636	-0.01636	0.01636	-1.07537	1.07537
g__Endozoicomonas	0.01702	0.02629	0.00069	0.0005	0.00073	24.5562	0.00602	0.00717	0.02761	0.01633	0.01633	0.01633	4.61801	4.61801
g__Phlegmacium	0.01635	0.08337	3e-05	8e-05	0.4817	624.835	0.6076	-8e-05	0.04905	0.01632	0.01632	0.01632	9.28733	9.28733
g__Bracoviriform	0.0002	0.00044	0.01645	0.04238	0.5425	0.01206	0.6682	-0.04468	4e-05	-0.01625	-0.01625	0.01625	-6.37363	6.37363
g__Megamonas	0.03337	0.0148	0.01712	0.00494	0.00055	1.94915	0.00496	0.01057	0.02252	0.01625	0.01625	0.01625	0.962845	0.962845
g__Candidatus_Fimicola	0.01075	0.00657	0.02685	0.02872	0.09305	0.4003	0.1905	-0.0365	-0.00027	-0.0161	-0.0161	0.0161	-1.32085	1.32085
g__Acetanaerobacterium	0.027	0.01703	0.0431	0.02169	0.0362	0.62647	0.09186	-0.03096	-0.0015	-0.0161	-0.0161	0.0161	-0.674683	0.674683
g__Mesorhizobium	0.04617	0.05019	0.03012	0.04398	0.06173	1.53265	0.1388	-0.01771	0.04772	0.01604	0.01605	0.01605	0.616028	0.616028
g__Simkania	0.01682	0.0319	0.00083	0.00211	0.00042	20.1889	0.00421	0.00645	0.03011	0.01599	0.01599	0.01599	4.33549	4.33549
g__Candidatus_Limivivens	0.0175	0.01326	0.03345	0.01916	0.00973	0.52326	0.0359	-0.03015	-0.00405	-0.01595	-0.01595	0.01595	-0.9344	0.9344
g__Thermoanaerobacter	0.01607	0.00838	0.0319	0.05983	0.3551	0.50371	0.4952	-0.05853	0.00846	-0.01583	-0.01583	0.01583	-0.989335	0.989335
g__Pancytospora	0.01574	0.05659	0	0	0.03518	0	0.09003	0.0002	0.03695	0.01574	0.01574	0.01574	#NUM!	#NUM!
g__Collinsella	0.03206	0.02343	0.01643	0.00537	0.05665	1.95133	0.13	0.00612	0.02582	0.01563	0.01563	0.01563	0.964458	0.964458
g__Pyrenochaeta	1e-05	1e-05	0.0156	0.0443	0.00023	0.0004	0.00312	-0.04543	-0.00025	-0.01559	-0.01559	0.01559	-11.2877	11.2877
g__Candidatus_Acidiferrum	0.03422	0.02484	0.01864	0.01308	0.1006	1.83586	0.1908	0.00289	0.02862	0.01558	0.01558	0.01558	0.876456	0.876456
g__Candidatus_Egerieimonas	0.00774	0.00534	0.02329	0.01146	0.00042	0.33241	0.00421	-0.0231	-0.00905	-0.01555	-0.01555	0.01555	-1.58896	1.58896
g__Candidatus_Borkfalkia	0.02095	0.01538	0.00543	0.00202	0.00015	3.8561	0.00241	0.01025	0.02175	0.01552	0.01552	0.01552	1.94714	1.94714
g__Candidatus_Scybalosoma	0.01886	0.02275	0.00344	0.00088	0.00696	5.47903	0.0278	0.00774	0.02483	0.01542	0.01542	0.01542	2.45392	2.45392
g__Lentihominibacter	0.02343	0.01111	0.00807	0.00372	0.00015	2.90259	0.00241	0.01053	0.01988	0.01536	0.01536	0.01536	1.53734	1.53734
g__Mordavella	0.00759	0.00742	0.02292	0.01431	0.00125	0.33098	0.00855	-0.02487	-0.00638	-0.01533	-0.01533	0.01533	-1.59518	1.59518
g__unclassified_p__Candidatus_Aminicenantota	0.03543	0.01938	0.02025	0.01898	0.01208	1.74989	0.0421	0.00052	0.02777	0.01518	0.01518	0.01518	0.807264	0.807264
g__Flexistipes	0.00514	0.00734	0.02029	0.04927	0.5334	0.25337	0.6582	-0.049	0.00468	-0.01515	-0.01515	0.01515	-1.98068	1.98068
g__Novisyntrophococcus	0.00849	0.00646	0.02358	0.01392	0.00185	0.36024	0.01129	-0.02369	-0.00611	-0.01508	-0.01509	0.01509	-1.47297	1.47297
g__Aequitasia	0.01875	0.00825	0.0338	0.02044	0.03969	0.5547	0.099	-0.02752	-0.00202	-0.01505	-0.01505	0.01505	-0.85022	0.85022
g__Candidatus_Ornithoclostridium	0.01591	0.01857	0.00099	0.0004	0.00015	16.0047	0.00241	0.00841	0.02293	0.01491	0.01492	0.01492	4.00042	4.00042
g__Syntrophomonas	0.02209	0.01148	0.03697	0.00783	0.00073	0.59746	0.00602	-0.02116	-0.0082	-0.01488	-0.01488	0.01488	-0.743086	0.743086
g__Entamoeba	0.01484	0.07477	0.00016	0.00014	0.3453	92.8162	0.4856	-0.0001	0.04411	0.01468	0.01468	0.01468	6.53631	6.53631
g__Parachlamydia	0.01604	0.03322	0.00137	0.00231	0.1173	11.6998	0.2127	0.00391	0.02956	0.01467	0.01467	0.01467	3.54842	3.54842
g__Suonthocola	0.01146	0.00787	0.02611	0.01219	0.00389	0.43905	0.01761	-0.02281	-0.00684	-0.01464	-0.01465	0.01465	-1.18754	1.18754
g__Candidatus_Ventrousia	0.0466	0.03645	0.03232	0.03059	0.3751	1.44182	0.5166	-0.00791	0.03631	0.01428	0.01428	0.01428	0.527891	0.527891
g__Desulfosarcina	0.04028	0.03828	0.02605	0.01157	0.5585	1.54613	0.6824	0.00036	0.0307	0.01423	0.01423	0.01423	0.628662	0.628662
g__Turicibacter	0.06037	0.02303	0.04622	0.0225	0.136	1.30623	0.2363	-0.00188	0.02945	0.01415	0.01415	0.01415	0.385409	0.385409
g__Hominenteromicrobium	0.02351	0.01371	0.00936	0.00501	0.00125	2.51305	0.00855	0.0087	0.02004	0.01416	0.01415	0.01415	1.32944	1.32944
g__unclassified_f__Oscillospiraceae	0.1134	0.11096	0.09936	0.03615	0.5585	1.14131	0.6824	-0.03046	0.06699	0.01404	0.01404	0.01404	0.190691	0.190691
g__Candidatus_Gallibacteroides	0.01559	0.02119	0.0016	0.00145	0.00438	9.73971	0.01926	0.00653	0.02222	0.01399	0.01399	0.01399	3.28388	3.28388
g__Desulfobulbus	0.04534	0.03759	0.03139	0.02218	0.4617	1.44427	0.5864	-0.00464	0.03221	0.01395	0.01395	0.01395	0.53034	0.53034
g__Candidatus_Excrementavichristensenella	0.01589	0.0348	0.00195	0.00079	0.00042	8.16734	0.00421	0.00498	0.02824	0.01395	0.01394	0.01394	3.02987	3.02987
g__Neobacillus	0.02381	0.01269	0.03748	0.01815	0.04754	0.63538	0.1144	-0.02658	-0.00307	-0.01366	-0.01367	0.01367	-0.654308	0.654308
g__Candidatus_Scybalocola_(ex_Gilroy_et_al._2021)	0.01411	0.01061	0.02773	0.01056	0.00621	0.50891	0.02533	-0.0207	-0.00576	-0.01362	-0.01362	0.01362	-0.974518	0.974518
g__Ructibacterium	0.02077	0.00815	0.00715	0.0026	4e-05	2.90349	0.00144	0.01019	0.01713	0.01361	0.01362	0.01362	1.53779	1.53779
g__Lactobacillus	0.02384	0.01398	0.01027	0.00385	0.00084	2.32061	0.00655	0.00768	0.01947	0.01357	0.01357	0.01357	1.2145	1.2145
g__Porphyromonas	0.01936	0.01521	0.00583	0.00532	0.00696	3.31976	0.0278	0.00712	0.02026	0.01353	0.01353	0.01353	1.73108	1.73108
g__Zhenpiania	0.02236	0.01599	0.03589	0.01912	0.06173	0.6231	0.1388	-0.02712	-0.00092	-0.01353	-0.01353	0.01353	-0.682464	0.682464
g__Intestinibacillus	0.07637	0.05658	0.08988	0.05332	0.2993	0.84969	0.4387	-0.05078	0.02765	-0.01351	-0.01351	0.01351	-0.234992	0.234992
g__Candidatus_Gallacutalibacter	0.06282	0.02235	0.07632	0.03186	0.1173	0.82306	0.2127	-0.03344	0.00861	-0.01351	-0.0135	0.0135	-0.28093	0.28093
g__Nostoc	0.00461	0.00307	0.01806	0.03743	0.3358	0.25541	0.4736	-0.03941	0.00103	-0.01345	-0.01345	0.01345	-1.96911	1.96911
g__unclassified_p__Candidatus_Saccharibacteria	0.05473	0.03164	0.04129	0.01911	0.2993	1.32569	0.4387	-0.00348	0.03098	0.01345	0.01344	0.01344	0.406743	0.406743
g__Rhodomicrobium	0.01471	0.01264	0.00131	0.0011	3e-05	11.2022	0.00136	0.00885	0.01844	0.0134	0.0134	0.0134	3.48571	3.48571
g__Hominisplanchenecus	0.00994	0.00803	0.0233	0.01133	0.00305	0.42675	0.01511	-0.02109	-0.00528	-0.01335	-0.01336	0.01336	-1.22854	1.22854
g__Selenobaculum	0.02104	0.04141	0.00771	0.00388	1	2.7279	1	-0.00051	0.03002	0.01333	0.01333	0.01333	1.44779	1.44779
g__Anaerosacchariphilus	0.02016	0.01571	0.03346	0.01656	0.02028	0.60254	0.05938	-0.02521	-0.00191	-0.0133	-0.0133	0.0133	-0.730871	0.730871
g__Zhaonella	0.01141	0.01392	0.02462	0.04676	0.3551	0.46345	0.4952	-0.04615	0.00686	-0.01321	-0.01321	0.01321	-1.10951	1.10951
g__Spiroplasma	0.01852	0.02406	0.00539	0.00755	0.01833	3.43777	0.05526	0.00345	0.02464	0.01313	0.01313	0.01313	1.78147	1.78147
g__Candidatus_Stoquefichus	0.53501	0.70823	0.52189	0.38969	0.3958	1.02514	0.5391	-0.3122	0.3525	0.01315	0.01312	0.01312	0.0358209	0.0358209
g__Candidatus_Colivicinus	0.01443	0.01508	0.00135	0.00112	0.00023	10.7269	0.00312	0.00813	0.01946	0.01308	0.01308	0.01308	3.42316	3.42316
g__Candidatus_Azobacteroides	0.0163	0.01506	0.00334	0.00353	0.0021	4.88718	0.01215	0.00701	0.01961	0.01297	0.01296	0.01296	2.289	2.289
g__Candidatus_Ventrenecus	0.02023	0.02355	0.00728	0.00688	0.1006	2.77773	0.1908	0.00403	0.0244	0.01295	0.01295	0.01295	1.47391	1.47391
g__Aestuariibaculum	0.01298	0.06292	0.00013	0.0003	0.00148	99.6906	0.00961	0.00024	0.03773	0.01285	0.01285	0.01285	6.63938	6.63938
g__Catonella	0.00393	0.00273	0.01677	0.00603	2e-05	0.23414	0.00117	-0.01722	-0.009	-0.01284	-0.01284	0.01284	-2.09456	2.09456
g__Pseudoalteromonas	0.01973	0.03641	0.00693	0.01371	0.03297	2.84683	0.08592	-0.00217	0.02968	0.0128	0.0128	0.0128	1.50936	1.50936
g__Bianquea	0.01506	0.01302	0.02784	0.01575	0.02472	0.54108	0.0684	-0.02376	-0.00135	-0.01278	-0.01278	0.01278	-0.886086	0.886086
g__Telmatospirillum	0.02291	0.02275	0.01021	0.00677	0.1462	2.24305	0.2507	0.0037	0.02298	0.0127	0.0127	0.0127	1.16546	1.16546
g__Sanguibacteroides	0.01742	0.01479	0.00473	0.00606	0.00238	3.68496	0.01325	0.00636	0.01966	0.01269	0.01269	0.01269	1.88165	1.88165
g__Veillonella	0.0229	0.01736	0.01023	0.00596	0.01085	2.23846	0.03929	0.005	0.02082	0.01267	0.01267	0.01267	1.16251	1.16251
g__Candidatus_Choladousia	0.00551	0.00567	0.01818	0.00649	0.00015	0.30326	0.00241	-0.01738	-0.00837	-0.01267	-0.01267	0.01267	-1.72137	1.72137
g__Gallintestinimicrobium	0.00908	0.00667	0.02173	0.01694	0.02725	0.41781	0.07381	-0.02376	-0.00275	-0.01265	-0.01265	0.01265	-1.25908	1.25908
g__Leptotrichia	0.02017	0.02441	0.00772	0.00383	0.136	2.61308	0.2363	0.00432	0.02322	0.01245	0.01245	0.01245	1.38575	1.38575
g__Candidatus_Epulonipiscium	0.115	0.03828	0.12744	0.07654	0.9248	0.90237	0.9497	-0.06144	0.03217	-0.01244	-0.01244	0.01244	-0.148209	0.148209
g__Frisingicoccus	0.02395	0.01116	0.03623	0.01682	0.00871	0.66123	0.03279	-0.02399	-0.00158	-0.01227	-0.01228	0.01228	-0.596776	0.596776
g__Mobilitalea	0.04218	0.01592	0.05445	0.03248	0.2345	0.77459	0.3594	-0.03391	0.00781	-0.01228	-0.01227	0.01227	-0.368495	0.368495
g__Pedobacter	0.02178	0.01624	0.00954	0.00628	0.02472	2.28362	0.0684	0.00528	0.01979	0.01224	0.01224	0.01224	1.19132	1.19132
g__Anaerosalibacter	0.02084	0.00861	0.00862	0.00393	0.00031	2.41879	0.00368	0.00856	0.01647	0.01223	0.01222	0.01222	1.27429	1.27429
g__Chitinophaga	0.01644	0.02758	0.00441	0.00379	0.00973	3.72831	0.0359	0.00395	0.02418	0.01203	0.01203	0.01203	1.89852	1.89852
g__Vischeria	0.00023	0.00078	0.01225	0.02575	0.02386	0.01899	0.06782	-0.0321	0.00013	-0.01202	-0.01202	0.01202	-5.71862	5.71862
g__Candidatus_Nitrosocosmicus	0.00163	0.0027	0.01361	0.01557	0.0027	0.11937	0.01418	-0.02265	-0.00339	-0.01199	-0.01198	0.01198	-3.06649	3.06649
g__unclassified_p__Candidatus_Hydrogenedentota	0.02704	0.01665	0.01507	0.00633	0.0362	1.7936	0.09186	0.00465	0.01953	0.01196	0.01197	0.01197	0.842858	0.842858
g__Sphingobacterium	0.01819	0.01147	0.00626	0.00602	0.00389	2.90727	0.01761	0.00645	0.01776	0.01194	0.01193	0.01193	1.53967	1.53967
g__Sarcina	0.0182	0.01935	0.00634	0.00258	0.1462	2.87251	0.2507	0.00532	0.02013	0.01186	0.01186	0.01186	1.52231	1.52231
g__Culicoidibacter	0.00469	0.00629	0.01653	0.02636	0.06173	0.28364	0.1388	-0.02938	0.00042	-0.01184	-0.01184	0.01184	-1.81787	1.81787
g__Faecousia	0.03475	0.01858	0.04659	0.01747	0.08593	0.74589	0.1797	-0.02467	0.0008	-0.01184	-0.01184	0.01184	-0.422965	0.422965
g__Macellibacteroides	0.02523	0.02259	0.0134	0.02605	0.03297	1.8824	0.08592	-0.00825	0.02736	0.01182	0.01183	0.01183	0.912573	0.912573
g__unclassified_o__Erysipelotrichales	0.00151	0.00188	0.01328	0.01384	0.00125	0.11348	0.00855	-0.02177	-0.00411	-0.01177	-0.01177	0.01177	-3.13949	3.13949
g__Panaeolus	0	0	0.01175	0.02265	1.096e-07	0	8e-05	-0.02768	-0.0015	-0.01175	-0.01175	0.01175	#NUM!	#NUM!
g__Youngiibacter	0.007	0.00286	0.01872	0.00697	0.00036	0.37424	0.00401	-0.01597	-0.0067	-0.01171	-0.01172	0.01172	-1.41796	1.41796
g__Denitrovibrio	0.00763	0.00966	0.01925	0.03946	0.7199	0.39652	0.7948	-0.03932	0.00552	-0.01162	-0.01162	0.01162	-1.33453	1.33453
g__Sporomusa	0.06392	0.02877	0.07549	0.03931	0.3958	0.84675	0.5391	-0.03799	0.01498	-0.01157	-0.01157	0.01157	-0.239992	0.239992
g__Anaeromassilibacillus	0.19232	0.12615	0.20388	0.14071	0.5842	0.94332	0.6902	-0.1173	0.07947	-0.01154	-0.01156	0.01156	-0.0841808	0.0841808
g__Limisalsivibrio	0.00191	0.00307	0.01343	0.0305	0.05665	0.14239	0.13	-0.03256	0.00033	-0.01152	-0.01152	0.01152	-2.81208	2.81208
g__Carboxylicivirga	0.01314	0.01166	0.00165	0.00166	0.00017	7.93881	0.00265	0.00737	0.01652	0.01148	0.01149	0.01149	2.98892	2.98892
g__Rhodobacter	0.00368	0.01041	0.01515	0.03725	0.8356	0.24313	0.879	-0.03646	0.00491	-0.01147	-0.01147	0.01147	-2.0402	2.0402
g__Bittarella_(ex_Durand_et_al._2017)	0.02118	0.01214	0.03253	0.01066	0.01343	0.6511	0.0458	-0.01852	-0.00305	-0.01135	-0.01135	0.01135	-0.619049	0.619049
g__Waltera	0.00741	0.00788	0.01866	0.01495	0.03969	0.39727	0.099	-0.02095	-0.00154	-0.01125	-0.01125	0.01125	-1.33181	1.33181
g__Maledivibacter	0.02222	0.01417	0.01099	0.005	0.00973	2.022	0.0359	0.00567	0.01764	0.01123	0.01123	0.01123	1.01578	1.01578
g__Jeotgalibacillus	0.01158	0.01106	0.00038	0.00039	2e-05	30.3449	0.00119	0.00727	0.01553	0.0112	0.0112	0.0112	4.92338	4.92338
g__unclassified_p__Candidatus_Absconditabacteria	0.01186	0.01196	0.00067	0.00098	4e-05	17.788	0.00149	0.00664	0.01643	0.0112	0.01119	0.01119	4.15283	4.15283
g__Anoxybacillus	0.01817	0.03303	0.00698	0.00355	0.485	2.60349	0.609	0.00135	0.02629	0.01119	0.01119	0.01119	1.38045	1.38045
g__Fumia	0.0644	0.0495	0.07558	0.05542	0.6371	0.85202	0.7214	-0.05578	0.02862	-0.01119	-0.01118	0.01118	-0.231041	0.231041
g__Mariniplasma	0.01155	0.02587	0.0004	0.00036	0.00096	28.9697	0.00718	0.00389	0.02272	0.01115	0.01115	0.01115	4.85647	4.85647
g__Circinella	0.01197	0.06097	0.00083	0.00169	8e-05	14.457	0.00168	-0.00153	0.03564	0.01115	0.01114	0.01114	3.85369	3.85369
g__Lentimicrobium	0.01222	0.01187	0.00108	0.00147	0.0002	11.3311	0.00292	0.0067	0.01625	0.01114	0.01114	0.01114	3.50221	3.50221
g__Roseibium	0.01198	0.01232	0.00085	0.00107	6e-05	14.0213	0.00163	0.00683	0.01661	0.01113	0.01113	0.01113	3.80955	3.80955
g__Candidatus_Faecivivens	0.00946	0.00714	0.02058	0.01415	0.02028	0.45983	0.05938	-0.02053	-0.00192	-0.01112	-0.01112	0.01112	-1.12083	1.12083
g__Ambispora	0.01235	0.06152	0.00123	0.00189	0.1647	10.0392	0.2779	-0.00193	0.03613	0.01112	0.01112	0.01112	3.32758	3.32758
g__Provencibacterium	0.21327	0.15255	0.20215	0.11565	0.9849	1.05504	0.9931	-0.08618	0.09787	0.01111	0.01112	0.01112	0.0772977	0.0772977
g__Lactococcus	0.04807	0.02331	0.05916	0.02895	0.2655	0.81259	0.3985	-0.03146	0.00916	-0.01109	-0.01109	0.01109	-0.2994	0.2994
g__Lysobacter	0.00472	0.01656	0.01575	0.03584	0.04754	0.29981	0.1144	-0.03824	0.0062	-0.01103	-0.01103	0.01103	-1.73788	1.73788
g__Colwellia	0.01282	0.03698	0.00182	0.00315	0.02353	7.04964	0.06694	-4e-05	0.02817	0.011	0.011	0.011	2.81755	2.81755
g__Acetobacteroides	0.01195	0.01076	0.00096	0.00105	9e-05	12.4858	0.00187	0.00713	0.01533	0.01099	0.01099	0.01099	3.64221	3.64221
g__Companilactobacillus	0.01391	0.01237	0.00293	0.00109	0.00162	4.75083	0.01018	0.00669	0.01555	0.01098	0.01098	0.01098	2.24818	2.24818
g__Wansuia	0.01106	0.01009	0.02198	0.0157	0.01655	0.50306	0.05218	-0.022	-0.0015	-0.01092	-0.01092	0.01092	-0.991198	0.991198
g__Candidatus_Alectryocaccobium	0.01209	0.01112	0.0012	0.00041	0.00013	10.0723	0.00224	0.00703	0.01542	0.01089	0.01089	0.01089	3.33232	3.33232
g__Desulfohalovibrio	0.01288	0.01833	0.00207	0.00161	0.00696	6.23672	0.0278	0.00492	0.01905	0.01082	0.01081	0.01081	2.64079	2.64079
g__Intestinibaculum	0.01377	0.0092	0.00297	0.00132	0.00042	4.63154	0.00421	0.00739	0.01469	0.0108	0.0108	0.0108	2.21149	2.21149
g__Colidextribacter	0.01087	0.00842	0.02159	0.01054	0.00973	0.50361	0.0359	-0.01778	-0.00383	-0.01071	-0.01072	0.01072	-0.989621	0.989621
g__unclassified_p__Thermoproteota	0.01722	0.015	0.0065	0.00551	0.01833	2.64733	0.05526	0.00406	0.01736	0.01072	0.01072	0.01072	1.40454	1.40454
g__Candidatus_Paraimprobicoccus	0.00067	0.00102	0.01136	0.01945	0.01207	0.05909	0.0421	-0.02413	-0.00128	-0.01069	-0.01069	0.01069	-4.08094	4.08094
g__Anaerobranca	0.01265	0.0073	0.002	0.00155	8e-05	6.32455	0.00168	0.00799	0.01354	0.01065	0.01065	0.01065	2.66096	2.66096
g__Vallitalea	0.06553	0.04089	0.05491	0.02421	0.5842	1.19344	0.6902	-0.01007	0.03125	0.01062	0.01062	0.01062	0.255126	0.255126
g__Smittium	0.01441	0.07289	0.00383	0.00485	9e-05	3.76392	0.00176	-0.00622	0.04114	0.01058	0.01058	0.01058	1.91224	1.91224
g__Bovifimicola	0.01707	0.00997	0.0065	0.00377	0.00042	2.62478	0.00421	0.00639	0.01505	0.01057	0.01057	0.01057	1.3922	1.3922
g__Chondrus	0.0113	0.05756	0.00074	0.00173	0.00197	15.2578	0.0119	-0.00144	0.03378	0.01056	0.01056	0.01056	3.93147	3.93147
g__Salidesulfovibrio	0.01393	0.01758	0.00344	0.00248	0.00973	4.04585	0.0359	0.00497	0.01774	0.01048	0.01049	0.01049	2.01644	2.01644
g__Sporolactobacillus	0.0064	0.00445	0.01688	0.00714	0.00036	0.37913	0.00401	-0.01523	-0.0057	-0.01048	-0.01048	0.01048	-1.39924	1.39924
g__Trabulsiella	0.00051	0.00076	0.01097	0.03165	0.6912	0.04669	0.771	-0.03178	0.00048	-0.01046	-0.01046	0.01046	-4.42074	4.42074
g__Parasitella	0.01333	0.06278	0.00292	0.00415	0.00147	4.56199	0.00959	-0.0043	0.03764	0.01041	0.01041	0.01041	2.18966	2.18966
g__Candidatus_Pullibacteroides	0.01045	0.01466	6e-05	7e-05	4e-05	171.166	0.00144	0.00522	0.01713	0.01039	0.01039	0.01039	7.41925	7.41925
g__Methanosarcina	0.00844	0.00621	0.01881	0.01701	0.02725	0.44847	0.07381	-0.02262	-0.00113	-0.01038	-0.01037	0.01037	-1.15692	1.15692
g__Nakamurella	0.01395	0.06333	0.00361	0.00503	0.5089	3.866	0.6321	-0.00474	0.03731	0.01034	0.01034	0.01034	1.95084	1.95084
g__unclassified_c__Deltaproteobacteria	0.01465	0.01323	0.00434	0.00248	0.00238	3.37489	0.01325	0.00554	0.01587	0.01031	0.01031	0.01031	1.75484	1.75484
g__Segatella	0.01518	0.01052	0.00487	0.00285	0.00696	3.1155	0.0278	0.00623	0.01502	0.01031	0.01031	0.01031	1.63946	1.63946
g__Alkaliphilus	0.05897	0.03329	0.04867	0.02023	0.7484	1.21172	0.8117	-0.00671	0.02901	0.0103	0.0103	0.0103	0.277056	0.277056
g__Muribaculum	0.01984	0.01433	0.0301	0.02122	0.1803	0.6592	0.2939	-0.02439	0.00327	-0.01026	-0.01026	0.01026	-0.601212	0.601212
g__Jannaschia	0.01029	0.01125	6e-05	8e-05	2e-05	161.112	0.00117	0.00648	0.01468	0.01022	0.01023	0.01023	7.33192	7.33192
g__Sulfitobacter	0.01187	0.0155	0.00164	0.00191	0.00023	7.25868	0.00312	0.00511	0.01709	0.01023	0.01023	0.01023	2.85971	2.85971
g__Candidatus_Pelagibacter	0.02198	0.0289	0.0118	0.01937	0.3551	1.86216	0.4952	-0.00673	0.02635	0.01018	0.01018	0.01018	0.896977	0.896977
g__Thermoanaerobacterium	0.01712	0.00981	0.02728	0.02444	0.2497	0.62768	0.3786	-0.02813	0.00227	-0.01016	-0.01016	0.01016	-0.671899	0.671899
g__Candidatus_Endomicrobiellum	0.01227	0.01733	0.00213	0.0017	0.05665	5.75993	0.13	0.00425	0.01676	0.01014	0.01014	0.01014	2.52605	2.52605
g__Buttiauxella	0.001	0.00078	0.01112	0.02533	0.00125	0.09024	0.00855	-0.02741	-0.001	-0.01012	-0.01012	0.01012	-3.47009	3.47009
g__Candidatus_Methanobinarius	0.34954	1.78232	0.33943	0.72439	0.00053	1.0298	0.00489	-0.6407	0.9703	0.0101	0.01011	0.01011	0.0423642	0.0423642
g__Thermoclostridium	0.02865	0.01543	0.03875	0.02057	0.1929	0.73917	0.3114	-0.02575	0.00197	-0.01011	-0.0101	0.0101	-0.436022	0.436022
g__Senegalia	0.01385	0.01147	0.00376	0.00172	0.00064	3.6813	0.00547	0.00625	0.0152	0.01008	0.01009	0.01009	1.88022	1.88022
g__Candidatus_Merdicola	0.044	0.04248	0.05405	0.14597	0.02472	0.81407	0.0684	-0.1159	0.05062	-0.01004	-0.01005	0.01005	-0.296775	0.296775
g__Parvibaculum	0.01084	0.01469	0.00085	0.00075	0.00064	12.7708	0.00547	0.00488	0.01604	0.00999	0.00999	0.00999	3.67478	3.67478
g__Bartonella	0.01154	0.0164	0.00157	0.00116	0.01655	7.33815	0.05218	0.00423	0.0163	0.00997	0.00997	0.00997	2.87542	2.87542
g__Heyndrickxia	0.01483	0.0113	0.00488	0.00301	0.00036	3.03795	0.00401	0.00559	0.01492	0.00995	0.00995	0.00995	1.6031	1.6031
g__Candidatus_Fimimorpha	0.04167	0.15201	0.03174	0.01898	0.00344	1.31273	0.01618	-0.02935	0.07604	0.00993	0.00993	0.00993	0.39257	0.39257
g__Magnetococcus	0.01028	0.02463	0.00041	0.00076	0.00493	24.8476	0.02124	0.00238	0.0207	0.00986	0.00987	0.00987	4.63504	4.63504
g__Alitiscatomonas	0.00108	0.00097	0.01092	0.00831	3e-05	0.09926	0.00144	-0.01492	-0.00497	-0.00983	-0.00984	0.00984	-3.33264	3.33264
g__Petroclostridium	0.0377	0.02742	0.02796	0.01641	0.485	1.34825	0.609	-0.00466	0.02414	0.00974	0.00974	0.00974	0.431088	0.431088
g__Monoglobus	0.0297	0.01701	0.02	0.00936	0.09305	1.4849	0.1905	0.00119	0.01869	0.0097	0.0097	0.0097	0.570366	0.570366
g__Massilioclostridium	0.04069	0.03332	0.031	0.01419	0.8062	1.31269	0.8549	-0.00425	0.0268	0.00969	0.00969	0.00969	0.392526	0.392526
g__unclassified_p__Candidatus_Melainabacteria	0.01397	0.00884	0.00436	0.00232	0.00015	3.20258	0.00241	0.00618	0.01347	0.00961	0.00961	0.00961	1.67923	1.67923
g__Coprinopsis	3.86997e-06	2e-05	0.00957	0.01921	1e-05	0.0004	0.00086	-0.02302	-0.00131	-0.00957	-0.00956613	0.00956613	-11.2877	11.2877
g__Petrimonas	0.01477	0.01233	0.00521	0.00516	0.01655	2.83768	0.05218	0.00397	0.01571	0.00957	0.00956	0.00956	1.50471	1.50471
g__Seleniivibrio	0.00559	0.00741	0.01514	0.03561	0.7916	0.36925	0.8444	-0.03462	0.00487	-0.00955	-0.00955	0.00955	-1.43733	1.43733
g__Umbelopsis	0.0007	0.00308	0.01023	0.01881	0.00026	0.06832	0.00323	-0.02446	-0.00065	-0.00953	-0.00953	0.00953	-3.87155	3.87155
g__Natranaerovirga	0.00495	0.00321	0.01445	0.01277	0.00143	0.34218	0.00934	-0.01771	-0.00314	-0.00951	-0.0095	0.0095	-1.54717	1.54717
g__Massilistercora	0.00225	0.00156	0.01173	0.008	3e-05	0.19154	0.00136	-0.01462	-0.00498	-0.00948	-0.00948	0.00948	-2.38428	2.38428
g__Edwardsiella	0.0158	0.03901	0.00634	0.00704	0.5334	2.49285	0.6582	-0.00219	0.0274	0.00946	0.00946	0.00946	1.3178	1.3178
g__Gordonibacter	0.22905	0.22273	0.21961	0.3088	0.3958	1.04295	0.5391	-0.2111	0.2145	0.00944	0.00944	0.00944	0.06067	0.06067
g__unclassified_p__Candidatus_Cloacimonadota	0.0225	0.01199	0.01313	0.00722	0.05193	1.7139	0.1211	0.00256	0.01601	0.00937	0.00937	0.00937	0.777283	0.777283
g__Fontibacillus	0.00283	0.00251	0.01219	0.0054	9e-05	0.23212	0.00187	-0.01283	-0.00593	-0.00936	-0.00936	0.00936	-2.10706	2.10706
g__unclassified_p__Candidatus_Aerophobetes	0.01079	0.00742	0.00143	0.00074	9e-05	7.51884	0.00187	0.00675	0.01219	0.00936	0.00936	0.00936	2.91051	2.91051
g__Candidatus_Bathycorpusculum	0.00333	0.00233	0.01268	0.00952	5e-05	0.26244	0.00163	-0.016	-0.00432	-0.00935	-0.00935	0.00935	-1.92994	1.92994
g__Niameybacter	0.04399	0.02488	0.05333	0.03187	0.6104	0.82491	0.6972	-0.03303	0.01108	-0.00934	-0.00934	0.00934	-0.277691	0.277691
g__Catenibacillus	0.00466	0.00388	0.01392	0.0067	0.00096	0.33467	0.00718	-0.01369	-0.00485	-0.00926	-0.00926	0.00926	-1.57919	1.57919
g__Acetobacterium	0.07671	0.02393	0.08594	0.03081	0.2345	0.89254	0.3594	-0.02894	0.01341	-0.00925	-0.00923	0.00923	-0.164011	0.164011
g__Lutispora	0.04194	0.02652	0.03289	0.01322	0.4171	1.27512	0.5493	-0.00372	0.0231	0.00905	0.00905	0.00905	0.350633	0.350633
g__Candidatus_Hennigella	0.01042	0.01603	0.00138	0.00223	0.00692	7.57191	0.0278	0.00339	0.01611	0.00904	0.00904	0.00904	2.92066	2.92066
g__Macrococcoides	0.00966	0.01039	0.00062	0.00058	0.00117	15.497	0.00841	0.00555	0.01322	0.00904	0.00904	0.00904	3.95391	3.95391
g__Holtiella	0.00896	0.00554	0.01798	0.00915	0.00621	0.49849	0.02533	-0.0148	-0.00315	-0.00902	-0.00902	0.00902	-1.00436	1.00436
g__Candidatus_Caccomorpha	0.00728	0.00606	0.0163	0.0104	0.00973	0.44665	0.0359	-0.01555	-0.00243	-0.00902	-0.00902	0.00902	-1.16278	1.16278
g__Breznakibacter	0.00942	0.00935	0.00043	0.00065	8e-05	21.9964	0.00168	0.00553	0.01278	0.00899	0.00899	0.00899	4.45919	4.45919
g__Duncaniella	0.02362	0.02889	0.01464	0.01785	0.2061	1.61394	0.329	-0.00665	0.02377	0.00899	0.00898	0.00898	0.690587	0.690587
g__Carboxydothermus	0.00472	0.00377	0.01367	0.02742	0.8356	0.34564	0.879	-0.02769	0.00247	-0.00894	-0.00895	0.00895	-1.53266	1.53266
g__Faecalibacillus	0.12912	0.09106	0.13807	0.11081	0.9549	0.93522	0.9735	-0.08846	0.06253	-0.00894	-0.00895	0.00895	-0.0966223	0.0966223
g__Pelotomaculum	0.02835	0.0128	0.03726	0.01462	0.05665	0.76094	0.13	-0.01852	0.0013	-0.00891	-0.00891	0.00891	-0.394145	0.394145
g__Jidongwangia	0.00213	0.00941	0.01104	0.02466	0.00816	0.19318	0.03126	-0.02646	0.00317	-0.00891	-0.00891	0.00891	-2.37198	2.37198
g__Cereibacter	0.00077	0.0015	0.00961	0.02427	0.6918	0.07979	0.771	-0.02552	0.00035	-0.00885	-0.00884	0.00884	-3.64765	3.64765
g__Draconibacterium	0.01093	0.00843	0.00209	0.00164	0.00064	5.22843	0.00547	0.00561	0.01251	0.00884	0.00884	0.00884	2.38638	2.38638
g__Rhabdothermincola	0.01548	0.03132	0.00665	0.00844	0.2993	2.32777	0.4387	-0.00249	0.02298	0.00883	0.00883	0.00883	1.21895	1.21895
g__Kandleria	0.01302	0.00833	0.00423	0.00269	0.00185	3.08149	0.01129	0.0052	0.01222	0.00879	0.00879	0.00879	1.62363	1.62363
g__unclassified_f__Ackermannviridae	0.00952	0.01233	0.00076	0.0008	0.00102	12.4765	0.00762	0.00449	0.01368	0.00876	0.00876	0.00876	3.64114	3.64114
g__Devosia	0.01286	0.01142	0.00413	0.00455	0.00779	3.1126	0.03007	0.00379	0.01393	0.00873	0.00873	0.00873	1.63812	1.63812
g__Paraeggerthella	0.01482	0.01407	0.02354	0.03351	0.7484	0.62971	0.8117	-0.03241	0.01001	-0.00872	-0.00872	0.00872	-0.667241	0.667241
g__Kluyvera	0.00032	0.00064	0.00904	0.02122	9e-05	0.0349	0.00187	-0.02303	-0.00116	-0.00872	-0.00872	0.00872	-4.84063	4.84063
g__unclassified_p__Candidatus_Zixiibacteriota	0.01331	0.01674	0.00465	0.00372	0.00779	2.86384	0.03007	0.00291	0.01622	0.00866	0.00866	0.00866	1.51795	1.51795
g__Megasphaera	0.01838	0.007	0.02697	0.01825	0.157	0.68164	0.2656	-0.02116	0.00155	-0.00859	-0.00859	0.00859	-0.552918	0.552918
g__Mycoplasmopsis	0.01012	0.01375	0.00153	0.0016	0.00305	6.63334	0.01511	0.00371	0.01453	0.0086	0.00859	0.00859	2.72974	2.72974
g__Candidatus_Pullichristensenella	0.02226	0.02163	0.01368	0.0054	0.5089	1.62711	0.6321	0.00085	0.01836	0.00858	0.00858	0.00858	0.702312	0.702312
g__Solirubrobacter	0.06033	0.26538	0.05177	0.08207	0.05193	1.16547	0.1211	-0.07902	0.1407	0.00858	0.00856	0.00856	0.220912	0.220912
g__unclassified_p__Candidatus_Neomarinimicrobiota	0.02363	0.03811	0.01508	0.01518	0.2821	1.56623	0.4177	-0.00773	0.028	0.00854	0.00855	0.00855	0.647296	0.647296
g__Ferruginibacter	0.01237	0.04236	0.00383	0.00592	0.1803	3.22672	0.2939	-0.00346	0.0272	0.00854	0.00854	0.00854	1.69007	1.69007
g__Sinanaerobacter	0.09263	0.06087	0.10114	0.04938	0.5585	0.91594	0.6824	-0.04615	0.03101	-0.0085	-0.00851	0.00851	-0.126675	0.126675
g__Fermentimonas	0.00922	0.00962	0.00072	0.00073	0.00068	12.8623	0.0058	0.00473	0.01225	0.0085	0.0085	0.0085	3.68508	3.68508
g__Allobaculum	0.01934	0.01058	0.01086	0.00531	0.01343	1.78151	0.0458	0.0038	0.01373	0.00849	0.00848	0.00848	0.833101	0.833101
g__Raoultella	0.00199	0.00621	0.01046	0.02348	0.00553	0.19034	0.02294	-0.02453	0.00182	-0.00847	-0.00847	0.00847	-2.39335	2.39335
g__Reyranella	0.01377	0.02244	0.0053	0.00625	0.07301	2.5957	0.1575	0.00036	0.0193	0.00846	0.00847	0.00847	1.37612	1.37612
g__Nitrosomonas	0.01396	0.00898	0.00551	0.00516	0.00621	2.5329	0.02533	0.00397	0.01316	0.00845	0.00845	0.00845	1.34079	1.34079
g__Anaeropeptidivorans	0.01699	0.00907	0.02543	0.00927	0.02241	0.66835	0.0641	-0.01477	-0.00134	-0.00843	-0.00844	0.00844	-0.581324	0.581324
g__Clostridiisalibacter	0.00284	0.00223	0.01126	0.02065	0.2821	0.25192	0.4177	-0.02285	0.00054	-0.00842	-0.00842	0.00842	-1.98896	1.98896
g__unclassified_p__Candidatus_Woesearchaeota	0.01429	0.02643	0.00589	0.0038	0.2993	2.4274	0.4387	-3e-05	0.02007	0.0084	0.0084	0.0084	1.27941	1.27941
g__Ileibacterium	0.01001	0.00789	0.00162	0.00176	0.00027	6.18708	0.00332	0.00524	0.01185	0.0084	0.00839	0.00839	2.62926	2.62926
g__Anaeromonas	0.00591	0.00347	0.01427	0.01721	0.08593	0.41383	0.1797	-0.02018	-0.00058	-0.00836	-0.00836	0.00836	-1.27289	1.27289
g__Pseudobutyrivibrio	0.02297	0.00781	0.03131	0.01131	0.01343	0.73385	0.0458	-0.01531	0.00021	-0.00833	-0.00834	0.00834	-0.446443	0.446443
g__Dethiosulfovibrio	0.02409	0.02382	0.01582	0.00989	0.5585	1.5221	0.6824	-0.00379	0.01974	0.00826	0.00827	0.00827	0.606063	0.606063
g__Flavisolibacter	0.00924	0.02611	0.001	0.00095	0.00238	9.2064	0.01325	0.00221	0.02278	0.00824	0.00824	0.00824	3.20264	3.20264
g__Candidatus_Caccoplasma	0.00905	0.00926	0.00083	0.00173	0.00013	10.8952	0.00224	0.00478	0.0123	0.00822	0.00822	0.00822	3.44562	3.44562
g__Brenneria	0.00951	0.00846	0.00129	0.00123	0.00048	7.35128	0.00451	0.0051	0.01171	0.00821	0.00822	0.00822	2.878	2.878
g__Terasakiella	0.00913	0.01288	0.00095	0.00212	0.00125	9.60569	0.00855	0.00372	0.01437	0.00818	0.00818	0.00818	3.26389	3.26389
g__unclassified_c__Thermoplasmata	0.01092	0.00795	0.00275	0.00188	0.00023	3.96824	0.00312	0.00502	0.01144	0.00817	0.00817	0.00817	1.9885	1.9885
g__Thermosyntropha	0.00173	0.00636	0.00987	0.02181	0.00305	0.17499	0.01511	-0.02551	0.00134	-0.00814	-0.00814	0.00814	-2.51466	2.51466
g__Massilibacterium	0.00879	0.00862	0.00067	0.00101	0.00013	13.186	0.00224	0.00504	0.01162	0.00812	0.00812	0.00812	3.72094	3.72094
g__Ohessyouella	0.01253	0.01282	0.02064	0.00896	0.02725	0.60718	0.07381	-0.01546	2e-05	-0.00811	-0.00811	0.00811	-0.719804	0.719804
g__Defluviitalea	0.01441	0.00817	0.02248	0.01176	0.09305	0.64125	0.1905	-0.01623	-0.00022	-0.00806	-0.00807	0.00807	-0.641041	0.641041
g__Rhizomicrobium	0.01042	0.01364	0.0024	0.00279	0.06717	4.33268	0.1492	0.0031	0.0142	0.00801	0.00802	0.00802	2.11526	2.11526
g__Cloacibacillus	0.06283	0.06599	0.05481	0.01713	0.3358	1.14632	0.4736	-0.01606	0.03823	0.00802	0.00802	0.00802	0.19701	0.19701
g__Paraburkholderia	0.01376	0.01446	0.00578	0.00355	0.02241	2.38313	0.0641	0.00282	0.01467	0.00799	0.00798	0.00798	1.25286	1.25286
g__Aliiruegeria	0.0082	0.01156	0.00023	0.00031	4e-05	36.1086	0.00149	0.00421	0.01268	0.00798	0.00797	0.00797	5.17427	5.17427
g__unclassified_p__Nitrososphaerota	0.01642	0.01815	0.00846	0.00562	0.4617	1.94066	0.5864	0.0005	0.01635	0.00796	0.00796	0.00796	0.956547	0.956547
g__Desulfobaculum	0.01301	0.01067	0.00506	0.00336	0.03297	2.56873	0.08592	0.00368	0.01233	0.00794	0.00795	0.00795	1.36106	1.36106
g__Mesoplasma	0.00872	0.00799	0.00077	0.00063	2e-05	11.3956	0.0013	0.0053	0.01126	0.00796	0.00795	0.00795	3.51041	3.51041
g__Candidatus_Megaera	0.00861	0.01034	0.00067	0.0013	0.00096	12.9495	0.00718	0.00411	0.01199	0.00795	0.00794	0.00794	3.69482	3.69482
g__Methanocaldococcus	0.00015	0.0002	0.00809	0.01704	0.03151	0.01859	0.08321	-0.0199	-0.00079	-0.00794	-0.00794	0.00794	-5.74933	5.74933
g__Candidatus_Symbiothrix	0.0106	0.0091	0.00269	0.00274	0.00344	3.94064	0.01618	0.00423	0.012	0.00791	0.00791	0.00791	1.97843	1.97843
g__Kiloniella	0.00854	0.01256	0.00065	0.00118	0.00237	13.1979	0.01325	0.00357	0.01315	0.00789	0.00789	0.00789	3.72223	3.72223
g__Puia	0.00942	0.03365	0.00153	0.00135	0.07925	6.16902	0.1677	0.00041	0.02191	0.00789	0.00789	0.00789	2.62504	2.62504
g__Capnocytophaga	0.01374	0.00872	0.00587	0.00391	0.00871	2.3394	0.03279	0.00364	0.01206	0.00787	0.00787	0.00787	1.22614	1.22614
g__Marinitoga	0.00158	0.00201	0.00945	0.0153	0.01342	0.16686	0.0458	-0.01767	-0.00058	-0.00787	-0.00787	0.00787	-2.58329	2.58329
g__Desertimonas	0.00522	0.01861	0.01304	0.02652	0.07002	0.40008	0.1526	-0.0288	0.00732	-0.00783	-0.00782	0.00782	-1.32164	1.32164
g__Mariniphaga	0.00872	0.00594	0.00093	0.001	0.00013	9.34346	0.00224	0.0055	0.01005	0.00779	0.00779	0.00779	3.22396	3.22396
g__Marmoricola	0.03597	0.11376	0.04374	0.07045	0.02241	0.82233	0.0641	-0.06992	0.05635	-0.00777	-0.00777	0.00777	-0.282211	0.282211
g__Nitrospira	0.01491	0.00972	0.00715	0.00687	0.00973	2.08499	0.0359	0.00144	0.01357	0.00776	0.00776	0.00776	1.06004	1.06004
g__Gracilaria	3.00266e-06	2e-05	0.00773	0.01475	1e-05	0.00039	0.00086	-0.01792	-0.0011	-0.00773	-0.007727	0.007727	-11.3242	11.3242
g__Syntrophorhabdus	0.00962	0.01137	0.0019	0.00196	0.00305	5.06355	0.01511	0.00347	0.01241	0.00772	0.00772	0.00772	2.34015	2.34015
g__Pumilibacter	0.00818	0.01193	0.00047	0.00029	0.00023	17.2313	0.00312	0.00377	0.01258	0.00771	0.00771	0.00771	4.10696	4.10696
g__Gracilibacillus	0.01704	0.01289	0.00935	0.00537	0.07925	1.82232	0.1677	0.00172	0.0139	0.00769	0.00769	0.00769	0.865776	0.865776
g__Hzauvirus	0.00765	0.01892	0	0	0.00125	0	0.00855	0.00125	0.01573	0.00765	0.00765	0.00765	#NUM!	#NUM!
g__Glaesserella	0.00789	0.01571	0.00027	0.0002	0.00972	29.2343	0.0359	0.00264	0.01479	0.00762	0.00762	0.00762	4.86959	4.86959
g__unclassified_o__Candidatus_Saccharimonadales	0.00579	0.00594	0.0134	0.02651	0.7484	0.4323	0.8117	-0.02666	0.00424	-0.00761	-0.00761	0.00761	-1.2099	1.2099
g__Geobacter	0.01648	0.01111	0.00895	0.01336	0.00696	1.84136	0.0278	-0.00335	0.01504	0.00753	0.00753	0.00753	0.880772	0.880772
g__Hominibacterium	0.00879	0.00742	0.01631	0.00572	0.00621	0.53885	0.02533	-0.01186	-0.0026	-0.00752	-0.00752	0.00752	-0.892044	0.892044
g__Raoultibacter	0.03739	0.02717	0.04487	0.03657	0.7771	0.83334	0.8343	-0.03621	0.01626	-0.00748	-0.00748	0.00748	-0.263023	0.263023
g__Lachnoanaerobaculum	0.00887	0.00598	0.01632	0.01008	0.02472	0.54329	0.0684	-0.01481	-0.00131	-0.00745	-0.00745	0.00745	-0.880206	0.880206
g__Syntrophobotulus	0.00789	0.00517	0.01534	0.00657	0.00438	0.51433	0.01926	-0.01174	-0.00234	-0.00745	-0.00745	0.00745	-0.959234	0.959234
g__Magnetovibrio	0.00778	0.00991	0.00033	0.00055	8e-05	23.8861	0.00168	0.00396	0.01163	0.00745	0.00745	0.00745	4.5781	4.5781
g__Thiohalocapsa	0.00859	0.00992	0.00115	0.00133	0.00084	7.48149	0.00655	0.00409	0.01142	0.00744	0.00744	0.00744	2.90333	2.90333
g__Vagococcus	0.02991	0.01736	0.02247	0.01173	0.2821	1.33116	0.4177	-0.00193	0.01793	0.00744	0.00744	0.00744	0.412684	0.412684
g__Candidatus_Coprenecus	0.0113	0.01174	0.00387	0.00664	0.01571	2.91868	0.05178	0.00131	0.01359	0.00743	0.00743	0.00743	1.54532	1.54532
g__Salisediminibacterium	0.00756	0.00769	0.00014	0.00016	2e-05	52.7741	0.0013	0.00491	0.01034	0.00742	0.00742	0.00742	5.72176	5.72176
g__Rhizoclosmatium	5e-05	0.00014	0.00746	0.01442	1.313e-06	0.00608	0.00031	-0.01727	-0.00104	-0.00741	-0.00741	0.00741	-7.36171	7.36171
g__Candidatus_Spyradocola	0.01675	0.00833	0.00937	0.00252	0.00871	1.78733	0.03279	0.00404	0.01055	0.00738	0.00738	0.00738	0.837806	0.837806
g__Martelella	0.00797	0.00853	0.00059	0.00057	0.00011	13.4614	0.00205	0.00431	0.01079	0.00737	0.00738	0.00738	3.75076	3.75076
g__Catenisphaera	0.01136	0.00851	0.00399	0.00252	0.01208	2.84927	0.0421	0.00358	0.01083	0.00737	0.00737	0.00737	1.51059	1.51059
g__Alkalicella	0.01066	0.01571	0.00331	0.00172	0.1929	3.21661	0.3114	0.00233	0.0141	0.00735	0.00735	0.00735	1.68554	1.68554
g__Paractinoplanes	0.01389	0.06516	0.02118	0.03921	0.00621	0.65562	0.02533	-0.04017	0.02695	-0.00729	-0.00729	0.00729	-0.609068	0.609068
g__Candidatus_Jidaibacter	0.00782	0.01268	0.00053	0.00131	0.1066	14.713	0.1974	0.00298	0.01307	0.00729	0.00729	0.00729	3.87902	3.87902
g__Xanthomonas	0.01121	0.01491	0.00393	0.00328	0.0362	2.85574	0.09186	0.00248	0.01423	0.00729	0.00728	0.00728	1.51386	1.51386
g__Epseptimavirus	0.00724	0.01618	0	0	0.00203	0	0.01202	0.00179	0.01418	0.00724	0.00724	0.00724	#NUM!	#NUM!
g__Fervidobacterium	0.0107	0.00957	0.00348	0.0024	0.02028	3.08002	0.05938	0.00339	0.0111	0.00723	0.00722	0.00722	1.62294	1.62294
g__Mogibacterium	0.02084	0.01371	0.01363	0.00319	0.1929	1.52876	0.3114	0.00174	0.01264	0.00721	0.00721	0.00721	0.612362	0.612362
g__Candidatus_Thiodiazotropha	0.00485	0.00561	0.01205	0.02268	0.5089	0.40222	0.6321	-0.02403	0.00285	-0.0072	-0.0072	0.0072	-1.31394	1.31394
g__unclassified_f__Methanomassiliicoccaceae	0.00276	0.00171	0.00994	0.00494	0.00027	0.27803	0.00332	-0.01028	-0.00385	-0.00718	-0.00718	0.00718	-1.84669	1.84669
g__Candidatus_Merdenecus	0.00663	0.00619	0.0138	0.00913	0.00871	0.48004	0.03279	-0.01329	-0.00124	-0.00718	-0.00717	0.00717	-1.05877	1.05877
g__Gorillibacterium	0.00172	0.00114	0.00884	0.00426	0.00031	0.19429	0.00368	-0.00969	-0.00433	-0.00712	-0.00712	0.00712	-2.36372	2.36372
g__Bauldia	0.00928	0.00925	0.00217	0.00306	0.00305	4.26802	0.01511	0.0035	0.01154	0.00711	0.00711	0.00711	2.09357	2.09357
g__Anaeroplasma	0.00885	0.00644	0.00178	0.00257	0.0002	4.96625	0.00292	0.00401	0.01001	0.00707	0.00707	0.00707	2.31216	2.31216
g__Hoeflea	0.00756	0.0104	0.00049	0.00091	7e-05	15.5877	0.00163	0.00348	0.01109	0.00708	0.00707	0.00707	3.96233	3.96233
g__Serpentinicella	0.00948	0.0072	0.00243	0.00207	0.00344	3.90333	0.01618	0.00414	0.01007	0.00705	0.00705	0.00705	1.96471	1.96471
g__Trichomonas	0.00717	0.00678	0.00015	0.00019	3e-05	47.0101	0.00144	0.00468	0.00968	0.00702	0.00702	0.00702	5.5549	5.5549
g__Sediminispirochaeta	0.01348	0.00988	0.00649	0.00323	0.02028	2.07758	0.05938	0.00277	0.01148	0.00699	0.00699	0.00699	1.0549	1.0549
g__Parvimonas	0.01363	0.00929	0.00665	0.00363	0.00973	2.05103	0.0359	0.0026	0.01118	0.00698	0.00698	0.00698	1.03635	1.03635
g__unclassified_p__Candidatus_Moraniibacteriota	0.00992	0.01039	0.00296	0.00353	0.00162	3.34528	0.01018	0.00279	0.01182	0.00695	0.00696	0.00696	1.74213	1.74213
g__Candidatus_Bealeia	0.00716	0.01218	0.0002	0.00039	0.01453	35.5149	0.04913	0.00258	0.01175	0.00696	0.00696	0.00696	5.15035	5.15035
g__Hominilimicola	0.01093	0.00733	0.00399	0.00254	0.02028	2.73923	0.05938	0.00373	0.01027	0.00694	0.00694	0.00694	1.45377	1.45377
g__Donellivirus	0.00738	0.01608	0.00045	0.00051	0.2981	16.5231	0.4387	0.00158	0.01444	0.00693	0.00693	0.00693	4.04641	4.04641
g__Desulfocurvibacter	0.01224	0.01054	0.00531	0.00321	0.07925	2.30756	0.1677	0.00273	0.01113	0.00694	0.00693	0.00693	1.20637	1.20637
g__Sneathiella	0.00776	0.00884	0.00084	0.00153	0.00015	9.20625	0.00241	0.00366	0.01068	0.00692	0.00692	0.00692	3.20261	3.20261
g__Desulfolutivibrio	0.0111	0.0109	0.01801	0.01298	0.04346	0.61663	0.1068	-0.01714	0.00107	-0.0069	-0.00691	0.00691	-0.697523	0.697523
g__Terrimicrobium	0.00667	0.0196	0.01355	0.0347	0.0847	0.49218	0.1784	-0.03379	0.01101	-0.00688	-0.00688	0.00688	-1.02274	1.02274
g__Lutibacter	0.01627	0.00995	0.00942	0.0156	0.00344	1.72711	0.01618	-0.00465	0.01499	0.00685	0.00685	0.00685	0.78836	0.78836
g__Hominiventricola	0.01251	0.0109	0.00568	0.00319	0.09305	2.20122	0.1905	0.00247	0.01166	0.00683	0.00683	0.00683	1.1383	1.1383
g__Sporosalibacterium	0.01428	0.01647	0.00746	0.00506	0.2345	1.91357	0.3594	0.00052	0.01431	0.00682	0.00682	0.00682	0.936267	0.936267
g__Fibrobacter	0.01414	0.00576	0.00735	0.00267	0.00143	1.92418	0.00934	0.00395	0.00962	0.00679	0.00679	0.00679	0.944244	0.944244
g__Allocoprobacillus	0.03555	0.03975	0.02878	0.02038	0.8356	1.23517	0.879	-0.01196	0.02614	0.00677	0.00677	0.00677	0.30471	0.30471
g__Absicoccus	0.00984	0.01028	0.00308	0.00179	0.04346	3.19245	0.1068	0.00313	0.01107	0.00676	0.00676	0.00676	1.67466	1.67466
g__Paraprevotella	0.0105	0.00835	0.00375	0.00385	0.01492	2.80313	0.04976	0.00301	0.01082	0.00675	0.00675	0.00675	1.48704	1.48704
g__Fervidicella	0.0086	0.00534	0.00187	0.00104	0.00084	4.58734	0.00655	0.00472	0.00902	0.00673	0.00673	0.00673	2.19766	2.19766
g__Alkalibacter	0.01184	0.00701	0.00513	0.0016	0.00143	2.30641	0.00934	0.00416	0.00962	0.00671	0.00671	0.00671	1.20565	1.20565
g__Thermocaproicibacter	0.00732	0.00514	0.01402	0.0064	0.00871	0.52208	0.03279	-0.01065	-0.002	-0.0067	-0.0067	0.0067	-0.937657	0.937657
g__Bowmanella	0.00675	0.03374	6e-05	0.00017	0.00484	109.614	0.02104	-2e-05	0.02	0.00669	0.00669	0.00669	6.77628	6.77628
g__Oceanibaculum	0.00672	0.00995	5e-05	7e-05	2e-05	147.461	0.00117	0.00337	0.01063	0.00668	0.00667	0.00667	7.20419	7.20419
g__Candidatus_Bandiella	0.00691	0.01059	0.00028	0.00042	0.00066	24.3075	0.00565	0.00329	0.01108	0.00662	0.00663	0.00663	4.60333	4.60333
g__Williamwhitmania	0.00729	0.00724	0.00066	0.00166	0.00017	11.0616	0.00265	0.00397	0.00963	0.00663	0.00663	0.00663	3.46749	3.46749
g__Gordonia	0.00896	0.01105	0.00233	0.00305	0.02028	3.84405	0.05938	0.00243	0.01165	0.00663	0.00663	0.00663	1.94263	1.94263
g__Tropicimonas	0.00708	0.01007	0.00046	0.00064	0.00023	15.3144	0.00312	0.00327	0.01071	0.00661	0.00662	0.00662	3.93682	3.93682
g__Victivallis	0.0173	0.04279	0.0107	0.00778	0.1264	1.61585	0.2251	-0.00781	0.02776	0.00659	0.0066	0.0066	0.692293	0.692293
g__Yokenella	6e-05	0.00017	0.00666	0.01638	0.00022	0.00925	0.0031	-0.01741	-0.00066	-0.0066	-0.0066	0.0066	-6.75633	6.75633
g__Asaccharospora	0.01097	0.00693	0.00439	0.00234	0.00344	2.49791	0.01618	0.0039	0.00966	0.00658	0.00658	0.00658	1.32072	1.32072
g__Candidatus_Syntrophocurvum	0.0012	0.00277	0.00778	0.01681	0.00862	0.15405	0.03272	-0.01834	0.00011	-0.00658	-0.00658	0.00658	-2.69853	2.69853
g__Trametes	4e-05	0.00017	0.00662	0.01094	4.559e-06	0.00636	0.00077	-0.01478	-0.00125	-0.00658	-0.00658	0.00658	-7.29676	7.29676
g__Fadolivirus	0.00659	0.01501	4e-05	7e-05	0.0225	169.037	0.06434	0.00161	0.01327	0.00655	0.00655	0.00655	7.40119	7.40119
g__Fastidiosibacter	0.00672	0.01194	0.00017	0.00026	0.0203	39.7209	0.0594	0.00277	0.01172	0.00656	0.00655	0.00655	5.31183	5.31183
g__Sediminibacterium	0.00703	0.02415	0.0005	0.00039	0.00048	14.0017	0.00451	0.00124	0.0167	0.00653	0.00653	0.00653	3.80753	3.80753
g__Ilumatobacter	0.00978	0.02855	0.01628	0.02973	0.1462	0.60067	0.2507	-0.03126	0.01263	-0.0065	-0.0065	0.0065	-0.735355	0.735355
g__Candidatus_Scatomonas	0.00465	0.0035	0.01114	0.00463	0.00162	0.41782	0.01018	-0.00952	-0.00312	-0.00648	-0.00649	0.00649	-1.25905	1.25905
g__Hornefia	0.00919	0.00775	0.0027	0.00194	0.00238	3.40136	0.01325	0.00379	0.00987	0.00649	0.00649	0.00649	1.76611	1.76611
g__Neocucurbitaria	1.7955e-06	1e-05	0.00647	0.01843	1.011e-07	0.00028	8e-05	-0.01893	-0.00012	-0.00647	-0.0064682	0.0064682	-11.8023	11.8023
g__Alternaria	7e-05	0.00032	0.00653	0.01861	2e-05	0.01102	0.00136	-0.01909	-4e-05	-0.00646	-0.00646	0.00646	-6.50373	6.50373
g__Listeria	0.07968	0.03892	0.07324	0.03601	0.3751	1.08798	0.5166	-0.02309	0.03074	0.00644	0.00644	0.00644	0.121652	0.121652
g__Gottschalkia	0.00784	0.00346	0.01422	0.0116	0.1087	0.55183	0.2	-0.01462	-0.00057	-0.00637	-0.00638	0.00638	-0.857704	0.857704
g__Aestuariispira	0.00657	0.00965	0.0002	0.00046	0.00017	33.341	0.00265	0.00303	0.01027	0.00637	0.00637	0.00637	5.05922	5.05922
g__Gallicola	0.03201	0.01883	0.03834	0.06165	0.1462	0.83485	0.2507	-0.05024	0.02028	-0.00633	-0.00633	0.00633	-0.260411	0.260411
g__Candidatus_Fimadaptatus	0.0113	0.01113	0.00497	0.00199	0.07301	2.2749	0.1575	0.00254	0.0111	0.00633	0.00633	0.00633	1.1858	1.1858
g__Candidatus_Amoebophilus	0.00696	0.01263	0.00063	0.00101	0.01833	11.1066	0.05526	0.00198	0.01121	0.00634	0.00633	0.00633	3.47335	3.47335
g__Aphanomyces	0.01381	0.06801	0.02007	0.03638	0.00024	0.68798	0.00312	-0.04198	0.03309	-0.00626	-0.00626	0.00626	-0.539561	0.539561
g__Piromyces	0.00649	0.00958	0.00023	0.00016	0.1462	27.8631	0.2507	0.00299	0.01028	0.00626	0.00626	0.00626	4.80028	4.80028
g__Xylanibacter	0.00823	0.007	0.00198	0.00212	0.00554	4.1656	0.02294	0.00324	0.00924	0.00625	0.00625	0.00625	2.05852	2.05852
g__Caenispirillum	0.00635	0.00893	0.00012	0.00011	0.00027	51.3443	0.00332	0.00309	0.01008	0.00622	0.00623	0.00623	5.68213	5.68213
g__Dongia	0.00667	0.01015	0.00046	0.00094	0.00553	14.6337	0.02294	0.00258	0.01079	0.00621	0.00621	0.00621	3.87122	3.87122
g__Methanosphaera	0.01213	0.00991	0.01833	0.03273	0.5585	0.66148	0.6824	-0.02984	0.00862	-0.00621	-0.0062	0.0062	-0.596231	0.596231
g__Candidatus_Adiutrix	0.03423	0.02464	0.02804	0.0099	0.7484	1.22081	0.8117	-0.00548	0.01758	0.00619	0.00619	0.00619	0.287839	0.287839
g__Pelosinus	0.01647	0.01172	0.02264	0.01148	0.1173	0.72749	0.2127	-0.01432	0.00253	-0.00617	-0.00617	0.00617	-0.459001	0.459001
g__Fonticella	0.00318	0.00232	0.00935	0.0146	0.1264	0.34044	0.2251	-0.01586	9e-05	-0.00617	-0.00617	0.00617	-1.55453	1.55453
g__Carnobacterium	0.02049	0.00913	0.02663	0.02041	0.6643	0.76961	0.7467	-0.02153	0.00467	-0.00613	-0.00614	0.00614	-0.377801	0.377801
g__unclassified_p__Candidatus_Nomurabacteria	0.01239	0.00957	0.00626	0.00346	0.03297	1.97909	0.08592	0.0026	0.01093	0.00613	0.00613	0.00613	0.984837	0.984837
g__Fundidesulfovibrio	0.02696	0.02582	0.02085	0.01474	0.8356	1.29316	0.879	-0.0061	0.02012	0.00611	0.00611	0.00611	0.370901	0.370901
g__Pelolinea	0.00169	0.00212	0.00779	0.00663	0.00344	0.21702	0.01618	-0.0104	-0.00224	-0.0061	-0.0061	0.0061	-2.2041	2.2041
g__Thalassospira	0.00797	0.00794	0.00187	0.00179	0.00238	4.25479	0.01325	0.00311	0.00974	0.00609	0.0061	0.0061	2.08909	2.08909
g__Breznakiella	0.01067	0.01572	0.01676	0.01016	0.00162	0.63669	0.01018	-0.01434	0.00329	-0.00609	-0.00609	0.00609	-0.651337	0.651337
g__Candidatus_Egerieenecus	0.01316	0.01225	0.00711	0.00399	0.1683	1.85045	0.282	0.0015	0.01172	0.00605	0.00605	0.00605	0.887876	0.887876
g__Candidatus_Accumulibacter	0.02424	0.01749	0.01824	0.01096	0.3958	1.32865	0.5391	-0.00264	0.01599	0.006	0.006	0.006	0.409961	0.409961
g__Iamia	0.0101	0.02592	0.0041	0.00629	0.5585	2.46238	0.6824	-0.00265	0.01866	0.006	0.006	0.006	1.30005	1.30005
g__Candidatus_Soleaferrea	0.04042	0.01705	0.04641	0.01713	0.1264	0.87081	0.2251	-0.01737	0.00704	-0.006	-0.00599	0.00599	-0.19957	0.19957
g__Helicobacter	0.02443	0.01704	0.01845	0.03327	0.01208	1.32429	0.0421	-0.01872	0.02193	0.00598	0.00598	0.00598	0.405219	0.405219
g__unclassified_o__Rickettsiales	0.00655	0.01084	0.00058	0.00151	0.01955	11.3	0.05841	0.00209	0.01119	0.00597	0.00597	0.00597	3.49826	3.49826
g__Lelliottia	0.00032	0.00045	0.00629	0.01219	0.416	0.05042	0.5493	-0.01399	1e-05	-0.00598	-0.00597	0.00597	-4.30986	4.30986
g__Anaeromicrobium	0.01084	0.00766	0.00488	0.00283	0.01655	2.22312	0.05218	0.00253	0.00939	0.00597	0.00596	0.00596	1.15259	1.15259
g__Peptoclostridium	0.01379	0.01057	0.00783	0.00335	0.05665	1.76246	0.13	0.00176	0.01066	0.00597	0.00596	0.00596	0.817591	0.817591
g__Aliidongia	0.00626	0.00906	0.0003	0.00063	0.00344	20.7441	0.01618	0.00285	0.00955	0.00596	0.00596	0.00596	4.37463	4.37463
g__Popoffvirus	4e-05	0.00016	0.00599	0.01798	0.7265	0.00624	0.7967	-0.01797	9e-05	-0.00596	-0.00595	0.00595	-7.32424	7.32424
g__Pontibacter	0.00735	0.00495	0.00146	0.00109	0.00036	5.04608	0.00401	0.00381	0.00773	0.00589	0.00589	0.00589	2.33516	2.33516
g__Ruegeria	0.00632	0.01067	0.00045	0.00047	5e-05	14.1648	0.00163	0.00257	0.01097	0.00587	0.00587	0.00587	3.82424	3.82424
g__Candidatus_Scybalousia_(ex_Gilroy_et_al._2022)	0.0065	0.01035	0.00065	0.00092	0.00142	10.0044	0.00934	0.00232	0.01041	0.00585	0.00585	0.00585	3.32256	3.32256
g__Microbulbifer	0.00723	0.00942	0.00141	0.00142	0.0027	5.13017	0.01418	0.00263	0.00971	0.00582	0.00582	0.00582	2.35901	2.35901
g__Peptoanaerobacter	0.01136	0.0148	0.00555	0.00276	0.2345	2.04658	0.3594	0.00062	0.01286	0.00581	0.00581	0.00581	1.03322	1.03322
g__Anabaena	0.00045	0.00044	0.00626	0.01589	0.00779	0.07198	0.03007	-0.01644	-0.00023	-0.00581	-0.00581	0.00581	-3.79626	3.79626
g__Grylomicrobium	0.00587	0.00685	7e-05	4e-05	5e-05	84.6005	0.00163	0.00346	0.00856	0.0058	0.0058	0.0058	6.40259	6.40259
g__Amaricoccus	0.02137	0.05028	0.01559	0.02231	0.8651	1.3703	0.9028	-0.01518	0.0294	0.00577	0.00578	0.00578	0.454492	0.454492
g__Caldisalinibacter	0.00596	0.00636	0.01173	0.02416	0.5089	0.50844	0.6321	-0.02299	0.0051	-0.00576	-0.00577	0.00577	-0.975851	0.975851
g__unclassified_o__Candidatus_Gastranaerophilales	0.03439	0.02948	0.02864	0.01763	0.8651	1.20101	0.9028	-0.0092	0.02264	0.00576	0.00575	0.00575	0.264248	0.264248
g__Drancourtella	0.00126	0.00129	0.007	0.005	0.00036	0.17969	0.00401	-0.00898	-0.00294	-0.00574	-0.00574	0.00574	-2.47642	2.47642
g__Crassaminicella	0.01147	0.006	0.00573	0.00315	0.01492	2.00164	0.04976	0.00258	0.00859	0.00574	0.00574	0.00574	1.00118	1.00118
g__Marinifilum	0.00663	0.00535	0.00089	0.00142	0.00036	7.43492	0.00401	0.00356	0.00798	0.00574	0.00574	0.00574	2.89432	2.89432
g__Desulfonispora	0.00475	0.00431	0.01048	0.02486	0.4171	0.45347	0.5493	-0.0232	0.0042	-0.00573	-0.00573	0.00573	-1.14092	1.14092
g__Candidatus_Deferrimicrobium	0.00931	0.01442	0.0036	0.00413	0.1006	2.5844	0.1908	0.00055	0.01186	0.00571	0.00571	0.00571	1.36983	1.36983
g__Sporobacter	0.01022	0.00941	0.01593	0.00595	0.01655	0.6412	0.05218	-0.01062	-0.00056	-0.00572	-0.00571	0.00571	-0.641154	0.641154
g__Thermanaerovibrio	0.0063	0.01333	0.00062	0.0014	0.01359	10.1478	0.04633	0.00113	0.01119	0.00568	0.00568	0.00568	3.34309	3.34309
g__Candidatus_Scatomorpha	0.0121	0.00725	0.01776	0.006	0.05665	0.68129	0.13	-0.00976	-0.00059	-0.00566	-0.00566	0.00566	-0.553659	0.553659
g__Robiginitomaculum	0.00586	0.01377	0.00021	0.00059	0.00012	28.3432	0.00224	0.00194	0.0117	0.00565	0.00565	0.00565	4.82493	4.82493
g__Novosphingobium	0.00838	0.01909	0.00275	0.00354	0.07925	3.05154	0.1677	-0.00072	0.01374	0.00563	0.00563	0.00563	1.60954	1.60954
g__Uwajimavirus	0.00561	0.01249	0	0	0.00506	0	0.02145	0.00153	0.01114	0.00561	0.00561	0.00561	#NUM!	#NUM!
g__Enterospora	0.00562	0.01997	3e-05	7e-05	0.3838	201.341	0.5271	5e-05	0.01442	0.00559	0.00559	0.00559	7.6535	7.6535
g__Halobacillus	0.01533	0.01555	0.00976	0.01267	0.1462	1.5703	0.2507	-0.0049	0.01481	0.00557	0.00557	0.00557	0.65104	0.65104
g__Peribacillus	0.01266	0.00476	0.01822	0.01415	0.157	0.69476	0.2656	-0.01514	0.00141	-0.00556	-0.00556	0.00556	-0.525413	0.525413
g__Jeotgalibaca	0.00246	0.00325	0.00802	0.005	0.00084	0.30672	0.00655	-0.00912	-0.00212	-0.00556	-0.00556	0.00556	-1.70501	1.70501
g__Ligilactobacillus	0.01372	0.01277	0.00817	0.00474	0.4617	1.67911	0.5864	-0.00015	0.0114	0.00555	0.00555	0.00555	0.747697	0.747697
g__Thermobrachium	0.00708	0.00644	0.00154	0.00125	0.00125	4.59065	0.00855	0.00323	0.00816	0.00554	0.00554	0.00554	2.1987	2.1987
g__Gracilibacter	0.00183	0.00129	0.00737	0.00837	0.00696	0.24865	0.0278	-0.01131	-0.00119	-0.00554	-0.00554	0.00554	-2.00781	2.00781
g__Tabrizicola	0.00117	0.00269	0.0067	0.01631	0.6371	0.17459	0.7214	-0.01692	0.00122	-0.00553	-0.00553	0.00553	-2.51796	2.51796
g__Anaerosporomusa	0.00241	0.00173	0.00794	0.00527	0.00017	0.30311	0.00265	-0.00947	-0.00261	-0.00554	-0.00553	0.00553	-1.72209	1.72209
g__Gabonibacter	0.00601	0.0053	0.00049	0.00101	0.00024	12.1958	0.00312	0.0035	0.0077	0.00552	0.00552	0.00552	3.60831	3.60831
g__Sunxiuqinia	0.00583	0.00499	0.00031	0.00029	4e-05	18.783	0.00149	0.0038	0.00748	0.00552	0.00552	0.00552	4.23136	4.23136
g__unclassified_o__Eubacteriales	0.01143	0.01009	0.00592	0.00402	0.1803	1.93222	0.2939	0.00101	0.01007	0.00552	0.00551	0.00551	0.950259	0.950259
g__Pseudocitrobacter	0	0	0.00547	0.01587	0.00277	0	0.01418	-0.01611	0	-0.00547	-0.00547	0.00547	#NUM!	#NUM!
g__Caldimicrobium	0.0001	0.00024	0.00557	0.01259	0.2581	0.01808	0.3905	-0.01407	-0.00029	-0.00547	-0.00547	0.00547	-5.78946	5.78946
g__Caloranaerobacter	0.00958	0.0047	0.00416	0.00113	0.00305	2.30491	0.01511	0.00344	0.00733	0.00542	0.00542	0.00542	1.20471	1.20471
g__Halocella	0.00556	0.00593	0.00015	0.0002	7e-05	36.1091	0.00163	0.00333	0.00776	0.0054	0.00541	0.00541	5.17429	5.17429
g__Chthoniobacter	0.00138	0.0008	0.00679	0.01064	0.02999	0.20283	0.07983	-0.01293	-0.0005	-0.00541	-0.00541	0.00541	-2.30166	2.30166
g__Globicatella	0.0062	0.00594	0.00079	0.0005	0.00017	7.89654	0.00265	0.00328	0.00774	0.00542	0.00541	0.00541	2.98122	2.98122
g__Synergistes	0.01646	0.01669	0.01105	0.00413	0.6919	1.4905	0.771	-0.0011	0.01256	0.00542	0.00541	0.00541	0.575796	0.575796
g__Bordetella	0.00985	0.00858	0.0045	0.00331	0.07301	2.19161	0.1575	0.00173	0.00904	0.00536	0.00535	0.00535	1.13199	1.13199
g__Thermohalobacter	0.0062	0.00541	0.00086	0.00059	0.0002	7.20508	0.00292	0.00346	0.00747	0.00534	0.00534	0.00534	2.84901	2.84901
g__Lamprocystis	0.00571	0.00673	0.00038	0.00033	0.00048	14.9471	0.00451	0.00296	0.0082	0.00533	0.00533	0.00533	3.90179	3.90179
g__Alkalidesulfovibrio	0.00748	0.00655	0.00216	0.00185	0.01492	3.46194	0.04976	0.00279	0.0082	0.00532	0.00532	0.00532	1.79158	1.79158
g__Corallococcus	0.0066	0.00553	0.00128	0.00089	0.00015	5.15747	0.00241	0.00343	0.00751	0.00532	0.00532	0.00532	2.36666	2.36666
g__Candidatus_Ornithomonoglobus	0.01079	0.00457	0.0055	0.00469	0.0021	1.96311	0.01215	0.00152	0.00842	0.00529	0.00529	0.00529	0.973141	0.973141
g__Candidatus_Faecicola	0.00543	0.00491	0.00014	0.00014	1e-05	37.786	0.001	0.00348	0.00702	0.00529	0.00529	0.00529	5.23978	5.23978
g__Nisaea	0.00566	0.00781	0.00039	0.00098	0.0002	14.4856	0.00292	0.00269	0.00846	0.00527	0.00527	0.00527	3.85655	3.85655
g__Tindallia	0.00699	0.00664	0.00172	0.00104	0.00554	4.05998	0.02294	0.00273	0.00793	0.00527	0.00527	0.00527	2.02147	2.02147
g__Candidatus_Allocopromorpha	0.01455	0.00844	0.00931	0.00409	0.136	1.56282	0.2363	0.00138	0.00938	0.00524	0.00524	0.00524	0.644152	0.644152
g__Tidunavirus	0.00524	0.01727	0	0	0.09404	0	0.1907	0.00011	0.01265	0.00524	0.00524	0.00524	#NUM!	#NUM!
g__Ferrovibrio	0.00586	0.00822	0.00063	0.00038	0.05665	9.32158	0.13	0.00243	0.00868	0.00524	0.00523	0.00523	3.22057	3.22057
g__Cucurbitaria	0	0	0.00522	0.01489	1.017e-06	0	0.00027	-0.01524	-7e-05	-0.00522	-0.00522	0.00522	#NUM!	#NUM!
g__Caldisericum	0.00022	0.0003	0.00543	0.01292	0.5083	0.03989	0.6321	-0.01395	-0.00013	-0.00521	-0.00521	0.00521	-4.64783	4.64783
g__Methanolobus	0.00969	0.0177	0.0045	0.00159	0.1683	2.15291	0.282	-0.0006	0.01256	0.00519	0.00519	0.00519	1.10629	1.10629
g__Tenuifilum	0.00559	0.00552	0.00041	0.00093	0.00028	13.738	0.00344	0.00301	0.00748	0.00519	0.00518	0.00518	3.7801	3.7801
g__Otagovirus	0.00523	0.01511	5e-05	0.00014	0.4025	113.526	0.5474	0.0006	0.01192	0.00519	0.00518	0.00518	6.82688	6.82688
g__Granulicatella	0.00725	0.00539	0.00208	0.00197	0.00084	3.48447	0.00655	0.00284	0.00791	0.00517	0.00517	0.00517	1.80094	1.80094
g__Anaerospora	0.00351	0.00306	0.00868	0.00721	0.02472	0.40495	0.0684	-0.00993	-0.00087	-0.00517	-0.00517	0.00517	-1.30418	1.30418
g__Mumia	0.00096	0.0026	0.0061	0.00794	0.01125	0.15801	0.04047	-0.01131	-0.00032	-0.00514	-0.00514	0.00514	-2.66191	2.66191
g__Pelagibius	0.00669	0.0056	0.00157	0.00141	0.00389	4.25508	0.01761	0.00287	0.00758	0.00512	0.00512	0.00512	2.08919	2.08919
g__Dehalobacterium	0.022	0.01385	0.0169	0.0069	0.4391	1.30137	0.5627	-0.00148	0.01206	0.00509	0.0051	0.0051	0.380031	0.380031
g__Candidatus_Avanaerovorax	0.00636	0.00737	0.00128	0.00066	0.00493	4.97556	0.02124	0.00249	0.00832	0.00508	0.00508	0.00508	2.31486	2.31486
g__Haloimpatiens	0.01196	0.00621	0.00689	0.00278	0.02472	1.73535	0.0684	0.00209	0.00789	0.00507	0.00507	0.00507	0.795227	0.795227
g__unclassified_p__candidate_division_WOR-3	0.00727	0.00453	0.0022	0.00153	0.00048	3.29939	0.00451	0.00326	0.00723	0.00507	0.00507	0.00507	1.7222	1.7222
g__Dermatobacter	0.00695	0.01124	0.00189	0.00201	0.09305	3.67994	0.1905	0.00132	0.00986	0.00506	0.00506	0.00506	1.87968	1.87968
g__Aeribacillus	0.00049	0.00057	0.00553	0.00325	2e-05	0.08789	0.00117	-0.00721	-0.00313	-0.00505	-0.00504	0.00504	-3.50816	3.50816
g__Aedoeadaptatus	0.00689	0.00733	0.00186	0.00221	0.02028	3.69887	0.05938	0.00182	0.00845	0.00503	0.00503	0.00503	1.88708	1.88708
g__Sphingopyxis	0.00656	0.00921	0.00153	0.0019	0.03969	4.29759	0.099	0.0017	0.00902	0.00504	0.00503	0.00503	2.10353	2.10353
g__Halodesulfovibrio	0.01904	0.01498	0.01402	0.00795	0.5334	1.35836	0.6582	-0.00271	0.0127	0.00502	0.00502	0.00502	0.441866	0.441866
g__Ralstonia	0.00926	0.00729	0.00426	0.00239	0.03969	2.17339	0.099	0.0019	0.00835	0.005	0.005	0.005	1.11995	1.11995
g__Candidatus_Electrothrix	0.00805	0.01071	0.00306	0.00384	0.0362	2.62946	0.09186	0.00066	0.01009	0.00499	0.00499	0.00499	1.39477	1.39477
g__Candidatus_Mesenet	0.00528	0.00863	0.00032	0.00056	0.0219	16.5707	0.06343	0.00191	0.00823	0.00496	0.00496	0.00496	4.05056	4.05056
g__Candidatus_Enterenecus	0.00643	0.004	0.01138	0.00536	0.00554	0.56509	0.02294	-0.00847	-0.00137	-0.00495	-0.00495	0.00495	-0.823447	0.823447
g__Salinivibrio	0.00527	0.01167	0.00033	0.00064	0.00114	15.8718	0.00821	0.00141	0.01008	0.00494	0.00494	0.00494	3.98839	3.98839
g__Humidesulfovibrio	0.01811	0.01556	0.01319	0.00988	0.6371	1.37306	0.7214	-0.00402	0.01334	0.00492	0.00492	0.00492	0.457395	0.457395
g__Irregularibacter	0.00877	0.00579	0.01369	0.00837	0.06173	0.64049	0.1388	-0.01081	0.00046	-0.00492	-0.00492	0.00492	-0.642752	0.642752
g__Candidatus_Egerieicola	0.00635	0.00335	0.01127	0.00488	0.00438	0.56329	0.01926	-0.00787	-0.00157	-0.00492	-0.00492	0.00492	-0.82805	0.82805
g__Nitrosopumilus	0.00563	0.01451	0.00071	0.00073	0.9849	7.87693	0.9931	0.00047	0.01188	0.00491	0.00492	0.00492	2.97763	2.97763
g__Candidatus_Onthovicinus	0.004	0.00251	0.0089	0.00699	0.00238	0.44904	0.01325	-0.00986	-0.00092	-0.0049	-0.0049	0.0049	-1.15508	1.15508
g__unclassified_p__Candidatus_Latescibacterota	0.01217	0.00713	0.00727	0.00334	0.04754	1.67429	0.1144	0.00173	0.00823	0.0049	0.0049	0.0049	0.743549	0.743549
g__Thermincola	0.00623	0.00745	0.01112	0.01648	0.3751	0.55973	0.5166	-0.01663	0.00349	-0.0049	-0.00489	0.00489	-0.837197	0.837197
g__Candidatus_Methanoplasma	0.00164	0.00186	0.00647	0.00314	0.00015	0.25399	0.00241	-0.0071	-0.0029	-0.00483	-0.00483	0.00483	-1.97716	1.97716
g__Oricola	0.00514	0.00939	0.00033	0.00055	0.00237	15.5372	0.01325	0.00193	0.00912	0.00481	0.00481	0.00481	3.95765	3.95765
g__Tieomvirus	0.00481	0.0227	0	0	0.1725	0	0.2847	2e-05	0.01401	0.00481	0.00481	0.00481	#NUM!	#NUM!
g__Cellulomonas	0.00244	0.00589	0.00723	0.01029	0.04346	0.33818	0.1068	-0.01224	0.00117	-0.00478	-0.00479	0.00479	-1.56414	1.56414
g__Gudongella	0.0138	0.0141	0.00902	0.00431	0.6919	1.53009	0.771	-0.00094	0.01147	0.00478	0.00478	0.00478	0.613617	0.613617
g__Schnuerera	0.01485	0.00964	0.01009	0.00435	0.1462	1.47163	0.2507	0.00034	0.00949	0.00476	0.00476	0.00476	0.557415	0.557415
g__Maribellus	0.00593	0.00483	0.00117	0.00092	0.00096	5.08188	0.00718	0.00294	0.00664	0.00477	0.00476	0.00476	2.34536	2.34536
g__unclassified_p__Candidatus_Parcubacteria	0.00806	0.0051	0.0033	0.0017	0.00389	2.43909	0.01761	0.00257	0.007	0.00475	0.00476	0.00476	1.28634	1.28634
g__Candidatus_Alectryocaccomicrobium	0.007	0.00762	0.00225	0.00112	0.00438	3.10888	0.01926	0.00225	0.00827	0.00475	0.00475	0.00475	1.63639	1.63639
g__Candidatus_Puniceispirillum	0.00508	0.00787	0.00034	0.00072	0.00124	14.862	0.00855	0.00211	0.00823	0.00474	0.00474	0.00474	3.89355	3.89355
g__Candidatus_Improbicoccus	0.00032	0.00031	0.00505	0.01367	0.3739	0.06318	0.5166	-0.01409	0.00028	-0.00473	-0.00473	0.00473	-3.98439	3.98439
g__Isoptericola	0.00606	0.0219	0.00134	0.0017	0.385	4.52215	0.5286	-0.00145	0.01363	0.00472	0.00472	0.00472	2.17701	2.17701
g__Olsenella	0.00257	0.00166	0.00728	0.00465	0.00185	0.35303	0.01129	-0.00807	-0.00206	-0.00471	-0.00471	0.00471	-1.50214	1.50214
g__Breoghania	0.0012	0.00204	0.00591	0.01516	0.1456	0.20366	0.2507	-0.01502	0.00129	-0.00471	-0.00471	0.00471	-2.29577	2.29577
g__Amphibacillus	0.00522	0.00542	0.00993	0.01166	0.1803	0.52565	0.2939	-0.01309	0.0016	-0.00471	-0.00471	0.00471	-0.927826	0.927826
g__Methylobacterium	0.00962	0.01607	0.00491	0.0057	0.07925	1.9616	0.1677	-0.00152	0.01241	0.00472	0.00471	0.00471	0.972031	0.972031
g__Paramaledivibacter	0.00412	0.00276	0.00882	0.01542	0.8651	0.46702	0.9028	-0.01543	0.0017	-0.0047	-0.0047	0.0047	-1.09844	1.09844
g__Brucella	0.00846	0.01022	0.00377	0.00452	0.06717	2.24508	0.1492	-0.0002	0.00929	0.00469	0.00469	0.00469	1.16677	1.16677
g__Candidatus_Fimivicinus	0.00757	0.00459	0.01226	0.00757	0.08593	0.61754	0.1797	-0.01003	0.00023	-0.00469	-0.00469	0.00469	-0.695396	0.695396
g__Couchioplanes	0.00152	0.00668	0.00621	0.01243	0.00787	0.24503	0.03028	-0.01315	0.00227	-0.00469	-0.00469	0.00469	-2.02897	2.02897
g__Kribbella	0.00365	0.00935	0.00832	0.01259	0.00493	0.43876	0.02124	-0.01428	0.003	-0.00467	-0.00467	0.00467	-1.1885	1.1885
g__Intrasporangium	0.00157	0.0034	0.00622	0.01141	0.03454	0.2522	0.08955	-0.01303	0.00066	-0.00465	-0.00465	0.00465	-1.98736	1.98736
g__Aminicella	0.00802	0.01094	0.00338	0.0016	0.1683	2.37451	0.282	0.00094	0.00984	0.00464	0.00464	0.00464	1.24763	1.24763
g__Simiaoa	0.00461	0.00387	0.00924	0.00715	0.1087	0.4985	0.2	-0.0094	7e-05	-0.00463	-0.00463	0.00463	-1.00433	1.00433
g__Kordiimonas	0.00537	0.00891	0.00075	0.00129	0.02241	7.13619	0.0641	0.00154	0.00867	0.00461	0.00462	0.00462	2.83515	2.83515
g__Mangrovibacterium	0.005	0.00431	0.00039	0.00067	0.0002	12.7317	0.00292	0.00285	0.00632	0.00461	0.00461	0.00461	3.67036	3.67036
g__Candidatus_Sulfotelmatobacter	0.0078	0.00657	0.00319	0.00331	0.02725	2.44248	0.07381	0.0014	0.00797	0.00461	0.00461	0.00461	1.28835	1.28835
g__Elioraea	0.00487	0.00694	0.00028	0.00043	0.00269	17.4913	0.01418	0.00222	0.00752	0.00459	0.00459	0.00459	4.12856	4.12856
g__Glomus	0.00114	0.00553	0.00572	0.01197	0.00026	0.19869	0.00323	-0.01252	0.00128	-0.00458	-0.00458	0.00458	-2.33141	2.33141
g__Sediminibacillus	0.00082	0.00288	0.00539	0.01266	0.3744	0.15258	0.5166	-0.01348	0.00079	-0.00457	-0.00457	0.00457	-2.71236	2.71236
g__unclassified_f__Candidatus_Saccharimonadaceae	0.00554	0.01137	0.00097	0.00097	0.07923	5.72934	0.1677	0.00148	0.00951	0.00457	0.00457	0.00457	2.51837	2.51837
g__Cuneatibacter	0.06582	0.20713	0.07037	0.03161	0.00143	0.93525	0.00934	-0.06267	0.08453	-0.00455	-0.00455	0.00455	-0.096576	0.096576
g__Sulfurovum	0.00251	0.00169	0.00703	0.0123	0.6104	0.35694	0.6972	-0.01316	0.00087	-0.00452	-0.00452	0.00452	-1.48625	1.48625
g__Marinobacter	0.00614	0.00429	0.00162	0.00146	0.00084	3.78045	0.00655	0.00277	0.00639	0.00452	0.00452	0.00452	1.91856	1.91856
g__Desulfoprunum	0.00467	0.00645	0.00015	0.00024	0.00022	30.4535	0.00308	0.00247	0.00738	0.00452	0.00452	0.00452	4.92854	4.92854
g__unclassified_f__Nimaviridae	0.00473	0.0088	0.00022	0.00051	0.02056	21.6774	0.06009	0.00151	0.00833	0.00451	0.00451	0.00451	4.43812	4.43812
g__Candidatus_Regiella	0.00456	0.00574	7e-05	0.0001	5e-05	68.8384	0.00163	0.00267	0.00675	0.0045	0.00449	0.00449	6.10514	6.10514
g__unclassified_p__Candidatus_Methylomirabilota	0.01338	0.01529	0.0089	0.01053	0.22	1.50377	0.3471	-0.00501	0.0134	0.00448	0.00448	0.00448	0.588584	0.588584
g__Gehongia	0.01943	0.00974	0.01496	0.00552	0.157	1.29856	0.2656	-0.00125	0.00934	0.00446	0.00447	0.00447	0.376913	0.376913
g__Maricaulis	0.0051	0.00958	0.00063	0.00058	0.0379	8.14324	0.09569	0.00144	0.0087	0.00447	0.00447	0.00447	3.0256	3.0256
g__Aminithiophilus	0.00578	0.0092	0.00132	0.00265	0.04153	4.36662	0.1031	0.0009	0.00867	0.00445	0.00446	0.00446	2.12652	2.12652
g__Piscinibacter	0.00496	0.00727	0.00052	0.00062	0.00084	9.63474	0.00655	0.00199	0.0077	0.00445	0.00444	0.00444	3.26825	3.26825
g__Desulfobacca	0.00468	0.00934	0.00025	0.00022	0.00491	18.8668	0.02124	0.0014	0.00906	0.00443	0.00443	0.00443	4.23778	4.23778
g__Anaerobutyricum	0.03601	0.01944	0.04044	0.01794	0.2061	0.89047	0.329	-0.01677	0.00986	-0.00443	-0.00443	0.00443	-0.167361	0.167361
g__Candidatus_Termititenax	0.00471	0.00883	0.00032	0.00065	0.00161	14.6921	0.01018	0.00167	0.00821	0.00439	0.00439	0.00439	3.87697	3.87697
g__Stella	0.00453	0.00609	0.00015	0.0002	0.00042	29.81	0.00421	0.00238	0.00692	0.00438	0.00438	0.00438	4.89773	4.89773
g__Abyssisolibacter	0.0049	0.00277	0.00926	0.00419	0.00871	0.52884	0.03279	-0.00705	-0.00158	-0.00436	-0.00436	0.00436	-0.919097	0.919097
g__Thermodesulfovibrio	0.00589	0.00785	0.00154	0.00163	0.01208	3.83357	0.0421	0.00144	0.0077	0.00435	0.00435	0.00435	1.93869	1.93869
g__Methanoculleus	0.00663	0.00571	0.00228	0.00132	0.01833	2.91262	0.05526	0.00201	0.00688	0.00435	0.00435	0.00435	1.54232	1.54232
g__Candidatus_Amulumruptor	0.00544	0.00716	0.0011	0.00109	0.00304	4.95856	0.01511	0.00189	0.00745	0.00434	0.00434	0.00434	2.30992	2.30992
g__Oribacterium	0.01336	0.00714	0.01769	0.00853	0.22	0.75537	0.3471	-0.01039	0.0016	-0.00433	-0.00433	0.00433	-0.404745	0.404745
g__Jutongia	0.00202	0.00275	0.00634	0.00661	0.00389	0.31913	0.01761	-0.00895	-0.00089	-0.00432	-0.00432	0.00432	-1.64778	1.64778
g__Suipraeoptans	0.00243	0.00209	0.00672	0.00534	0.00344	0.3619	0.01618	-0.00765	-0.00135	-0.00429	-0.00429	0.00429	-1.46634	1.46634
g__Lachnobacterium	0.00287	0.00264	0.00715	0.00353	0.0027	0.40221	0.01418	-0.00649	-0.0018	-0.00427	-0.00428	0.00428	-1.31398	1.31398
g__Stutzerimonas	0.00613	0.01418	0.00185	0.00163	0.06717	3.30588	0.1492	0.00043	0.01057	0.00427	0.00428	0.00428	1.72503	1.72503
g__Sphingobium	0.00698	0.01744	0.00271	0.0028	0.3551	2.57758	0.4952	-0.00078	0.01174	0.00427	0.00427	0.00427	1.36602	1.36602
g__Alteracholeplasma	0.00462	0.00522	0.00036	0.0005	0.00041	12.9756	0.00421	0.00254	0.00642	0.00427	0.00426	0.00426	3.69772	3.69772
g__Emcibacter	0.00447	0.00692	0.00021	0.0005	0.00158	21.2636	0.01012	0.002	0.00709	0.00426	0.00426	0.00426	4.41031	4.41031
g__Paramuribaculum	0.00506	0.00534	0.00081	0.00051	0.00048	6.22519	0.00451	0.00239	0.00664	0.00425	0.00425	0.00425	2.63812	2.63812
g__Candidatus_Onthomonas	0.00453	0.00304	0.00878	0.00338	0.00084	0.51647	0.00655	-0.00687	-0.00152	-0.00424	-0.00425	0.00425	-0.953244	0.953244
g__Desulfobacter	0.00978	0.00827	0.00554	0.00373	0.1803	1.76579	0.2939	0.00075	0.00851	0.00424	0.00424	0.00424	0.820314	0.820314
g__Candidatus_Caccopulliclostridium	0.0045	0.0054	0.00026	0.00051	0.00013	17.1049	0.00224	0.0025	0.00679	0.00424	0.00424	0.00424	4.09634	4.09634
g__Candidatus_Ornithocaccomicrobium	0.0083	0.0096	0.00407	0.00184	0.2345	2.03912	0.3594	0.00081	0.00825	0.00423	0.00423	0.00423	1.02795	1.02795
g__unclassified_p__Candidatus_Thorarchaeota	0.00497	0.00814	0.00075	0.00058	0.0027	6.66122	0.01418	0.00156	0.00765	0.00422	0.00422	0.00422	2.73579	2.73579
g__Sedimentibacter	0.23653	0.15046	0.24073	0.08604	0.4617	0.98257	0.5864	-0.07954	0.07395	-0.0042	-0.0042	0.0042	-0.0253679	0.0253679
g__Candidatus_Scatovicinus	0.00181	0.00142	0.00601	0.00339	0.00064	0.30066	0.00547	-0.00653	-0.00212	-0.0042	-0.0042	0.0042	-1.7338	1.7338
g__Candidatus_Faecaligallichristensenella	0.01759	0.02514	0.0134	0.00577	0.7199	1.31289	0.7948	-0.00394	0.01592	0.00419	0.00419	0.00419	0.392746	0.392746
g__Aminiphilus	0.00918	0.01471	0.00499	0.00474	0.6643	1.84098	0.7467	-0.00155	0.0107	0.00419	0.00419	0.00419	0.880474	0.880474
g__Thermanaeromonas	0.00848	0.00801	0.0043	0.00268	0.2655	1.9748	0.3985	0.00098	0.00782	0.00419	0.00418	0.00418	0.981707	0.981707
g__Geosporobacter	0.022	0.018	0.01783	0.00597	0.8651	1.23378	0.9028	-0.00246	0.01271	0.00417	0.00417	0.00417	0.303085	0.303085
g__Peptococcus	0.00091	0.00076	0.00506	0.00956	0.0134	0.17937	0.0458	-0.01078	-0.00028	-0.00415	-0.00415	0.00415	-2.47899	2.47899
g__unclassified_p__Candidatus_Desantisbacteria	0.00452	0.00913	0.00038	0.00027	0.00389	11.8827	0.01761	0.00112	0.00795	0.00414	0.00414	0.00414	3.57079	3.57079
g__Labilibaculum	0.00517	0.00431	0.00104	0.00148	0.00185	4.96882	0.01129	0.00231	0.00604	0.00413	0.00413	0.00413	2.3129	2.3129
g__Niabella	0.0053	0.01325	0.00118	0.00184	0.00871	4.49475	0.03279	0.00056	0.01006	0.00412	0.00412	0.00412	2.16824	2.16824
g__unclassified_f__Eubacteriales_Family_XIII._Incertae_Sedis	0.01552	0.01208	0.01142	0.00809	0.1803	1.35871	0.2939	-0.00284	0.01049	0.0041	0.0041	0.0041	0.442238	0.442238
g__Chara	0.00016	0.00034	0.00426	0.01091	0.00125	0.03733	0.00855	-0.01144	-0.0002	-0.0041	-0.0041	0.0041	-4.74352	4.74352
g__unclassified_o__Chroococcidiopsidales	3e-05	0.00014	0.00412	0.01231	0.2597	0.00781	0.3922	-0.01233	6e-05	-0.00409	-0.00409	0.00409	-7.00046	7.00046
g__Fusibacillus	0.00417	0.00845	0.00826	0.00393	0.0011	0.50547	0.00796	-0.00779	0.00021	-0.00408	-0.00409	0.00409	-0.984303	0.984303
g__Brucepastera	0.00805	0.00787	0.01213	0.01247	0.1929	0.66375	0.3114	-0.01304	0.0033	-0.00408	-0.00408	0.00408	-0.591288	0.591288
g__unclassified_f__Candidatus_Deferrimicrobiaceae	0.00411	0.01842	5e-05	9e-05	0.00183	78.439	0.01129	0.00023	0.01149	0.00406	0.00406	0.00406	6.2935	6.2935
g__Elstera	0.00424	0.00643	0.00018	0.00044	0.00107	23.0933	0.00791	0.00181	0.00724	0.00405	0.00406	0.00406	4.5294	4.5294
g__unclassified_p__Candidatus_Gottesmanbacteria	0.00031	0.00036	0.00437	0.00984	0.8055	0.0703	0.8549	-0.01088	0.0001	-0.00407	-0.00406	0.00406	-3.83033	3.83033
g__Maribacter	0.00379	0.00254	0.00783	0.01536	0.5334	0.48351	0.6582	-0.01494	0.00235	-0.00404	-0.00404	0.00404	-1.04838	1.04838
g__Atopostipes	0.00501	0.01071	0.00097	0.00078	0.01655	5.14359	0.05218	0.00083	0.0089	0.00403	0.00404	0.00404	2.36278	2.36278
g__Jonquetella	0.00553	0.00509	0.0015	0.00153	0.00438	3.68447	0.01926	0.00205	0.00632	0.00403	0.00403	0.00403	1.88146	1.88146
g__Kehishuvirus	0.00433	0.00513	0.0003	0.00074	0.00055	14.3149	0.00496	0.00223	0.00615	0.00403	0.00403	0.00403	3.83945	3.83945
g__Candidatus_Trichorickettsia	0.00429	0.00652	0.00027	0.0006	0.00618	15.6675	0.02533	0.0018	0.00653	0.00402	0.00402	0.00402	3.9697	3.9697
g__Govania	0.00404	0.00619	3e-05	6e-05	6e-05	143.053	0.00163	0.00186	0.00647	0.00401	0.00401	0.00401	7.16041	7.16041
g__Sulfurimonas	0.00664	0.00449	0.00264	0.00296	0.00096	2.51805	0.00718	0.0015	0.00645	0.004	0.004	0.004	1.33231	1.33231
g__Rhizoctonia	0.00444	0.02245	0.00044	0.00072	0.00015	10.0836	0.00244	-0.00073	0.01303	0.004	0.004	0.004	3.33394	3.33394
g__Luoshenia	0.01254	0.00625	0.00855	0.00331	0.04346	1.46622	0.1068	0.00078	0.00697	0.00399	0.00399	0.00399	0.552102	0.552102
g__Oceanobacillus	0.01365	0.00979	0.00967	0.00584	0.5089	1.4111	0.6321	-0.00148	0.00928	0.00398	0.00398	0.00398	0.49682	0.49682
g__Andreesenia	0.00831	0.00636	0.00435	0.00185	0.136	1.91187	0.2363	0.00155	0.00668	0.00397	0.00396	0.00396	0.934984	0.934984
g__Candidatus_Gallipaludibacter	0.00404	0.00451	9e-05	0.00022	6e-05	42.7866	0.00163	0.00247	0.00587	0.00395	0.00395	0.00395	5.41909	5.41909
g__Candidatus_Petromonas	0.00693	0.00805	0.00299	0.00162	0.1173	2.31655	0.2127	0.00123	0.00732	0.00394	0.00394	0.00394	1.21198	1.21198
g__Candidatus_Limivicinus	0.00682	0.00414	0.01076	0.00515	0.02472	0.63402	0.0684	-0.00765	-0.00034	-0.00394	-0.00394	0.00394	-0.6574	0.6574
g__Psychrilyobacter	0.00533	0.00536	0.00139	0.00253	0.00344	3.84471	0.01618	0.00146	0.00649	0.00394	0.00394	0.00394	1.94287	1.94287
g__Thermanaerosceptrum	0.00386	0.004	0.0078	0.00883	0.04346	0.49476	0.1068	-0.01056	0.00034	-0.00394	-0.00394	0.00394	-1.0152	1.0152
g__Candidatus_Colinaster	0.00702	0.00814	0.01095	0.00893	0.157	0.64066	0.2656	-0.01012	0.00181	-0.00394	-0.00393	0.00393	-0.642369	0.642369
g__Yersinia	0.00758	0.01012	0.00366	0.00457	0.1683	2.07172	0.282	-0.00087	0.00897	0.00392	0.00392	0.00392	1.05083	1.05083
g__Candidatus_Onthenecus	0.00756	0.00549	0.00364	0.0018	0.02725	2.07458	0.07381	0.00167	0.00655	0.00392	0.00392	0.00392	1.05282	1.05282
g__Georgenia	0.00055	0.00111	0.00447	0.0073	0.06171	0.12352	0.1388	-0.00872	-0.00038	-0.00392	-0.00392	0.00392	-3.01718	3.01718
g__Robertmurraya	0.00561	0.00556	0.0017	0.00121	0.00162	3.29868	0.01018	0.00188	0.00635	0.00391	0.00391	0.00391	1.72189	1.72189
g__Pectinatus	0.01663	0.01194	0.02053	0.01789	0.6104	0.81016	0.6972	-0.01741	0.00648	-0.0039	-0.0039	0.0039	-0.303721	0.303721
g__unclassified_p__Candidatus_Omnitrophota	0.03479	0.01863	0.0309	0.02519	0.2821	1.12577	0.4177	-0.01457	0.01928	0.00389	0.00389	0.00389	0.170912	0.170912
g__Agrobacterium	0.00701	0.02104	0.00314	0.00274	0.4617	2.23402	0.5864	-0.00187	0.01362	0.00387	0.00387	0.00387	1.15964	1.15964
g__Marinilactibacillus	0.00131	0.00133	0.00517	0.00482	0.00438	0.25291	0.01926	-0.00725	-0.00121	-0.00386	-0.00386	0.00386	-1.9833	1.9833
g__Candidatus_Stercoripulliclostridium	0.00591	0.00434	0.00205	0.00136	0.02028	2.87992	0.05938	0.00205	0.00573	0.00386	0.00386	0.00386	1.52603	1.52603
g__Candidatus_Finniella	0.01558	0.02239	0.01944	0.05712	0.1263	0.80146	0.2251	-0.04659	0.0219	-0.00386	-0.00386	0.00386	-0.319298	0.319298
g__Candidatus_Colimorpha	0.00776	0.00471	0.00391	0.00158	0.02999	1.9869	0.07983	0.0019	0.00594	0.00386	0.00385	0.00385	0.990519	0.990519
g__Ahrensia	0.00391	0.00846	6e-05	0.00013	5e-05	63.9616	0.00163	0.00113	0.00746	0.00385	0.00385	0.00385	5.99913	5.99913
g__Ornithinibacter	0.00447	0.00807	0.0083	0.01235	0.4391	0.53828	0.5627	-0.01253	0.00353	-0.00384	-0.00383	0.00383	-0.893571	0.893571
g__Papillibacter	0.02155	0.0125	0.01773	0.00514	0.4391	1.21549	0.5627	-0.00195	0.0099	0.00382	0.00382	0.00382	0.281538	0.281538
g__Thermovirga	0.00533	0.00898	0.00151	0.00293	0.07293	3.53698	0.1575	0.0002	0.00802	0.00382	0.00382	0.00382	1.82252	1.82252
g__Mangrovihabitans	0.00071	0.00318	0.00452	0.01098	0.00246	0.15712	0.01367	-0.01201	0.00087	-0.00381	-0.00381	0.00381	-2.67006	2.67006
g__Methanococcus	0.00135	0.00156	0.00515	0.011	0.7484	0.26322	0.8117	-0.0113	0.00086	-0.00379	-0.0038	0.0038	-1.92566	1.92566
g__unclassified_p__Candidatus_Peregrinibacteria	0.00544	0.00929	0.00166	0.00143	0.05193	3.27135	0.1211	0.00103	0.00812	0.00377	0.00378	0.00378	1.70989	1.70989
g__Anaerosphaera	0.00196	0.00119	0.00573	0.00368	0.00064	0.34196	0.00547	-0.00628	-0.00172	-0.00377	-0.00377	0.00377	-1.5481	1.5481
g__Enfavirus	0.00376	0.01832	0	0	0.1725	0	0.2847	1.832e-06	0.01116	0.00376	0.00376	0.00376	#NUM!	#NUM!
g__Metaclostridioides	0.01175	0.01338	0.00799	0.00354	0.7771	1.47075	0.8343	-0.00132	0.00991	0.00376	0.00376	0.00376	0.556552	0.556552
g__Proteiniborus	0.0279	0.02281	0.02417	0.0094	0.7771	1.15418	0.8343	-0.00597	0.01487	0.00373	0.00373	0.00373	0.206868	0.206868
g__Halanaerobium	0.00988	0.00601	0.00615	0.00295	0.05665	1.60664	0.13	0.0011	0.00661	0.00373	0.00373	0.00373	0.684047	0.684047
g__Dialister	0.00776	0.00502	0.01148	0.00544	0.07925	0.67599	0.1677	-0.00787	1e-05	-0.00372	-0.00372	0.00372	-0.564926	0.564926
g__Hoylesella	0.00491	0.00348	0.00119	0.00118	0.00438	4.14465	0.01926	0.00218	0.00527	0.00373	0.00372	0.00372	2.05125	2.05125
g__Candidatus_Scalindua	0.00581	0.00461	0.0021	0.00279	0.00344	2.77064	0.01618	0.0013	0.00589	0.00372	0.00371	0.00371	1.47022	1.47022
g__Mucilaginibacter	0.00975	0.00708	0.00604	0.00593	0.09305	1.61369	0.1905	-0.00101	0.00801	0.00371	0.00371	0.00371	0.690363	0.690363
g__Ancylomarina	0.00468	0.00357	0.00098	0.00226	0.00042	4.76397	0.00421	0.00166	0.00556	0.0037	0.0037	0.0037	2.25216	2.25216
g__Allofrancisella	0.00371	0.00861	1e-05	2e-05	0.00053	686.432	0.00483	0.0013	0.0072	0.0037	0.0037	0.0037	9.42297	9.42297
g__Pyramidobacter	0.02217	0.01643	0.01847	0.00881	0.6104	1.20039	0.6972	-0.00473	0.01217	0.0037	0.0037	0.0037	0.263503	0.263503
g__Senimuribacter	0.00429	0.00541	0.0006	0.00066	0.00084	7.19479	0.00655	0.00192	0.00593	0.0037	0.00369	0.00369	2.84695	2.84695
g__Lederbergia	0.00343	0.00211	0.00712	0.00843	0.1462	0.48183	0.2507	-0.01005	0.00028	-0.00369	-0.00369	0.00369	-1.0534	1.0534
g__Litchfieldia	0.00078	0.00158	0.00446	0.00922	0.09302	0.17524	0.1905	-0.01062	0.00032	-0.00368	-0.00368	0.00368	-2.5126	2.5126
g__Flavihumibacter	0.00412	0.01493	0.00045	0.00052	0.05423	9.0943	0.1262	0.00034	0.00974	0.00367	0.00367	0.00367	3.18496	3.18496
g__Coxiella	0.00412	0.00521	0.00045	0.00072	0.00096	9.24983	0.00718	0.00196	0.00592	0.00367	0.00367	0.00367	3.20943	3.20943
g__Dehalobacter	0.03645	0.02034	0.0328	0.01346	0.8062	1.11139	0.8549	-0.00772	0.01515	0.00365	0.00365	0.00365	0.152365	0.152365
g__Inquilinus	0.00454	0.00574	0.00089	0.00097	0.02999	5.08766	0.07983	0.00177	0.00619	0.00365	0.00365	0.00365	2.347	2.347
g__Isobaculum	0.00181	0.00125	0.00545	0.00324	0.00096	0.3318	0.00718	-0.00588	-0.00168	-0.00364	-0.00364	0.00364	-1.59161	1.59161
g__Candidatus_Gaiellasilicea	0.00054	0.00187	0.00418	0.01083	0.1505	0.12859	0.2573	-0.01118	0.0007	-0.00364	-0.00364	0.00364	-2.95915	2.95915
g__Leclercia	0.00122	0.00352	0.00485	0.01271	0.571	0.25159	0.6902	-0.01275	0.00192	-0.00363	-0.00363	0.00363	-1.99085	1.99085
g__Coemansia	0.00472	0.01555	0.0011	0.00165	0.2272	4.28855	0.3568	-0.00111	0.0107	0.00362	0.00362	0.00362	2.10049	2.10049
g__Leucocoprinus	0.00517	0.02636	0.00155	0.0027	8e-05	3.33255	0.00168	-0.00273	0.01498	0.00362	0.00362	0.00362	1.73663	1.73663
g__Perlabentimonas	0.00403	0.00397	0.00042	0.00041	0.00143	9.68251	0.00934	0.00224	0.00529	0.00361	0.00361	0.00361	3.27538	3.27538
g__Planococcus	0.00199	0.00301	0.00559	0.00352	0.00042	0.3562	0.00421	-0.00601	-0.00116	-0.0036	-0.0036	0.0036	-1.48924	1.48924
g__Pseudorhodoplanes	0.01303	0.03071	0.00944	0.01764	0.3958	1.37988	0.5391	-0.01302	0.01855	0.00359	0.00359	0.00359	0.464543	0.464543
g__Peptoniphilus	0.01773	0.01263	0.01415	0.01736	0.1462	1.25305	0.2507	-0.01013	0.01328	0.00358	0.00358	0.00358	0.325444	0.325444
g__Candidatus_Merdisoma	0.01442	0.00872	0.01084	0.00508	0.3958	1.33028	0.5391	-0.00082	0.00847	0.00358	0.00358	0.00358	0.41173	0.41173
g__Saccharofermentans	0.01599	0.00672	0.01242	0.00613	0.2655	1.28819	0.3985	-0.00108	0.00854	0.00358	0.00357	0.00357	0.365345	0.365345
g__Brevundimonas	0.00508	0.00426	0.00151	0.00166	0.00344	3.36365	0.01618	0.00184	0.00555	0.00357	0.00357	0.00357	1.75003	1.75003
g__Alsobacter	0.00368	0.00293	0.00011	0.00014	2e-05	33.4849	0.00119	0.00255	0.00475	0.00357	0.00357	0.00357	5.06544	5.06544
g__Pseudogracilibacillus	0.00479	0.00891	0.00122	0.00088	0.02028	3.91291	0.05938	0.00096	0.00767	0.00356	0.00357	0.00357	1.96824	1.96824
g__Phycicoccus	0.01112	0.01387	0.00755	0.01123	0.22	1.47282	0.3471	-0.00512	0.01161	0.00357	0.00357	0.00357	0.558581	0.558581
g__Candidatus_Coproplasma	0.00558	0.00388	0.00202	0.00186	0.00493	2.76196	0.02124	0.00177	0.00545	0.00356	0.00356	0.00356	1.46569	1.46569
g__Teretinema	0.00391	0.01236	0.00745	0.01697	0.5972	0.52515	0.6902	-0.01683	0.00645	-0.00354	-0.00354	0.00354	-0.929199	0.929199
g__Oxalobacter	0.0188	0.0097	0.01527	0.00696	0.2655	1.23158	0.3985	-0.00204	0.00905	0.00354	0.00353	0.00353	0.30051	0.30051
g__Gallibacter	0.00507	0.0045	0.00154	0.00071	0.0021	3.28238	0.01215	0.00196	0.00531	0.00352	0.00353	0.00353	1.71474	1.71474
g__Amylibacter	0.0036	0.00346	7e-05	0.00011	2e-05	52.3338	0.00117	0.00236	0.00501	0.00353	0.00353	0.00353	5.70967	5.70967
g__Shimazuella	0.00181	0.00166	0.00533	0.0074	0.2497	0.33949	0.3786	-0.00892	0.00032	-0.00352	-0.00352	0.00352	-1.55856	1.55856
g__Candidatus_Fimiplasma	0.01406	0.01284	0.01055	0.00563	0.8651	1.33343	0.9028	-0.00218	0.00991	0.00352	0.00351	0.00351	0.415142	0.415142
g__Caldalkalibacillus	0.00625	0.00599	0.00974	0.00618	0.1006	0.64173	0.1908	-0.00785	0.00073	-0.00349	-0.00349	0.00349	-0.639962	0.639962
g__Piscirickettsia	0.0036	0.0082	0.00011	0.00019	0.03336	33.1307	0.08674	0.00082	0.00699	0.00349	0.00349	0.00349	5.0501	5.0501
g__Ensifer	0.00554	0.00502	0.00205	0.00191	0.01833	2.69873	0.05526	0.00143	0.00596	0.00349	0.00349	0.00349	1.43228	1.43228
g__Kagunavirus	3e-05	0.00012	0.00351	0.01053	0.7265	0.00724	0.7967	-0.01053	7e-05	-0.00349	-0.00348	0.00348	-7.10979	7.10979
g__Alicyclobacillus	0.00858	0.00496	0.00511	0.00283	0.03969	1.67839	0.099	0.00081	0.00608	0.00347	0.00347	0.00347	0.747078	0.747078
g__Aromatoleum	0.00192	0.00143	0.00538	0.00643	0.3358	0.357	0.4736	-0.00762	0.00032	-0.00346	-0.00346	0.00346	-1.486	1.486
g__Polaribacter	0.00497	0.00412	0.00151	0.00072	0.00973	3.29453	0.0359	0.00186	0.00511	0.00346	0.00346	0.00346	1.72007	1.72007
g__Curvivirga	0.00353	0.00545	8e-05	0.00017	0.00239	45.7257	0.01328	0.00163	0.0057	0.00345	0.00345	0.00345	5.51493	5.51493
g__unclassified_f__Zobellviridae	0.00345	0.01377	0	0	0.03518	0	0.09003	0.0002	0.00937	0.00345	0.00345	0.00345	#NUM!	#NUM!
g__Salipiger	0.00369	0.00625	0.00026	0.00031	0.00031	14.3243	0.00368	0.00153	0.0062	0.00343	0.00343	0.00343	3.84039	3.84039
g__Methylomusa	0.00097	0.00109	0.00439	0.00279	0.00073	0.2212	0.00602	-0.00526	-0.00159	-0.00342	-0.00342	0.00342	-2.17658	2.17658
g__Giardia	0.00364	0.00684	0.00022	0.00053	0.01838	16.3921	0.0554	0.00112	0.00617	0.00342	0.00342	0.00342	4.03493	4.03493
g__Xenorhabdus	0.00552	0.00523	0.00211	0.00255	0.02999	2.62219	0.07983	0.00098	0.00596	0.00342	0.00341	0.00341	1.39077	1.39077
g__Zavarzinia	0.0036	0.00548	0.00019	0.00035	0.0049	18.4457	0.02124	0.00159	0.00567	0.0034	0.00341	0.00341	4.20521	4.20521
g__Kosakonia	0.00049	0.00057	0.00389	0.00873	0.2819	0.12681	0.4177	-0.00939	0.00015	-0.0034	-0.0034	0.0034	-2.97926	2.97926
g__unclassified_p__Candidatus_Aenigmatarchaeota	0.0079	0.0127	0.00451	0.00552	0.7484	1.75192	0.8117	-0.00218	0.00909	0.00339	0.00339	0.00339	0.808937	0.808937
g__Halalkalibacterium_(ex_Joshi_et_al._2022)	0.00073	0.00043	0.00412	0.00382	0.00621	0.17779	0.02533	-0.00587	-0.00118	-0.00339	-0.00339	0.00339	-2.49175	2.49175
g__Puteibacter	0.00404	0.00539	0.00065	0.00086	0.00621	6.24275	0.02533	0.00156	0.00575	0.0034	0.00339	0.00339	2.64218	2.64218
g__Enterovibrio	0.00369	0.01375	0.0003	0.00037	0.00462	12.4546	0.02019	0.00042	0.01114	0.00339	0.00339	0.00339	3.63861	3.63861
g__unclassified_p__Candidatus_Margulisiibacteriota	0.00582	0.00458	0.00243	0.00132	0.01492	2.39693	0.04976	0.00152	0.00547	0.00339	0.00339	0.00339	1.26119	1.26119
g__Lentzea	0.00552	0.01781	0.00214	0.0024	0.9849	2.57728	0.9931	-0.00145	0.01202	0.00338	0.00338	0.00338	1.36585	1.36585
g__unclassified_p__Candidatus_Rifleibacteriota	0.01164	0.00691	0.00826	0.00324	0.2993	1.40954	0.4387	-1e-05	0.00692	0.00338	0.00338	0.00338	0.495224	0.495224
g__Mycobacteroides	0.01074	0.01094	0.00736	0.0081	0.1006	1.46001	0.1908	-0.00307	0.00993	0.00338	0.00338	0.00338	0.545978	0.545978
g__Thalassobaculum	0.00412	0.00468	0.00075	0.00086	0.01085	5.49745	0.03929	0.00156	0.00525	0.00337	0.00337	0.00337	2.45876	2.45876
g__Lientehia	0.01107	0.0108	0.01443	0.00871	0.09305	0.76713	0.1905	-0.01031	0.00339	-0.00336	-0.00336	0.00336	-0.382457	0.382457
g__Brachybacterium	0.00017	0.00027	0.00353	0.00773	0.00294	0.04821	0.01482	-0.00864	-0.00039	-0.00336	-0.00336	0.00336	-4.37452	4.37452
g__Orientia	0.00337	0.009	2e-05	5e-05	0.00039	139.249	0.00421	0.00092	0.00718	0.00334	0.00335	0.00335	7.12153	7.12153
g__Candidatus_Desulfatibia	0.00349	0.01624	0.00016	0.00028	0.04317	22.172	0.1068	-3e-05	0.00986	0.00333	0.00333	0.00333	4.47067	4.47067
g__Candidatus_Aphodomonas	0.00705	0.00618	0.00373	0.00151	0.09305	1.89109	0.1905	0.00087	0.00587	0.00332	0.00332	0.00332	0.919218	0.919218
g__Chelatococcus	0.00397	0.00349	0.00065	0.00072	0.0002	6.09799	0.00292	0.00202	0.00484	0.00332	0.00332	0.00332	2.60833	2.60833
g__Winogradskyella	0.0041	0.00368	0.00079	0.00079	0.00064	5.16024	0.00547	0.00194	0.00478	0.00331	0.00331	0.00331	2.36744	2.36744
g__Oceanispirochaeta	0.00761	0.00946	0.0043	0.00312	0.7771	1.76984	0.8343	-0.00059	0.00768	0.00331	0.00331	0.00331	0.823619	0.823619
g__unclassified_p__Candidatus_Sumerlaeota	0.00726	0.00597	0.00395	0.00272	0.07925	1.8362	0.1677	0.00053	0.00642	0.00331	0.00331	0.00331	0.876723	0.876723
g__Peptostreptococcus	0.0092	0.0047	0.01247	0.0044	0.04754	0.73765	0.1144	-0.00631	0.00016	-0.00327	-0.00327	0.00327	-0.438992	0.438992
g__Risungbinella	0.00015	0.00038	0.00342	0.00183	2.745e-06	0.04426	0.00051	-0.00451	-0.00217	-0.00327	-0.00327	0.00327	-4.49785	4.49785
g__Candidatus_Asgardarchaeum_(ex_Tamarit_et_al._2024)	0.00328	0.00825	2e-05	4e-05	0.00139	184.338	0.00931	0.00081	0.00702	0.00326	0.00326	0.00326	7.52621	7.52621
g__Desulfonatronum	0.009	0.00818	0.00574	0.00578	0.3358	1.56703	0.4736	-0.00098	0.00773	0.00326	0.00326	0.00326	0.648033	0.648033
g__Vescimonas	0.00718	0.00371	0.01043	0.00563	0.1173	0.68853	0.2127	-0.0068	0.00041	-0.00325	-0.00325	0.00325	-0.538409	0.538409
g__Leptospira	0.00528	0.00548	0.00204	0.00093	0.02028	2.58698	0.05938	0.00126	0.00562	0.00324	0.00324	0.00324	1.37127	1.37127
g__Beograduvirus	0	0	0.00324	0.00876	0.00277	0	0.01418	-0.0094	0	-0.00324	-0.00324	0.00324	#NUM!	#NUM!
g__Zoogloea	0.00417	0.004	0.00094	0.00079	0.00344	4.45006	0.01618	0.0018	0.00491	0.00324	0.00323	0.00323	2.15382	2.15382
g__Acidiphilium	0.00446	0.00335	0.00123	0.00114	0.00143	3.63803	0.00934	0.00175	0.00475	0.00323	0.00323	0.00323	1.86316	1.86316
g__Geomonas	0.00193	0.00284	0.00514	0.00643	0.00344	0.37477	0.01618	-0.0078	8e-05	-0.00321	-0.00321	0.00321	-1.41592	1.41592
g__Rhodoblastus	0.00351	0.00308	0.00032	0.0005	0.00023	10.9882	0.00312	0.00201	0.00435	0.00319	0.00319	0.00319	3.45788	3.45788
g__Absidia	3e-05	0.00013	0.00322	0.00579	1e-05	0.01009	0.00092	-0.00708	-0.00051	-0.00319	-0.00319	0.00319	-6.63093	6.63093
g__Acidilutibacter	0.01062	0.00655	0.00743	0.00396	0.22	1.42829	0.3471	-0.00046	0.0069	0.00318	0.00319	0.00319	0.514289	0.514289
g__Parapedobacter	0.00449	0.00327	0.00132	0.0015	0.00696	3.4106	0.0278	0.00164	0.00459	0.00317	0.00317	0.00317	1.77003	1.77003
g__Anderseniella	0.00329	0.00481	0.00012	0.00025	4e-05	27.5191	0.00149	0.00153	0.00533	0.00317	0.00317	0.00317	4.78236	4.78236
g__Nitella	6e-05	0.00012	0.00322	0.00816	0.0304	0.0183	0.08084	-0.00875	-0.00014	-0.00317	-0.00316	0.00316	-5.77201	5.77201
g__Anaerobacterium	0.00746	0.00564	0.01061	0.00356	0.05665	0.70285	0.13	-0.00616	0.00015	-0.00315	-0.00315	0.00315	-0.508711	0.508711
g__Rivularia	0.00415	0.00607	0.001	0.0015	0.03297	4.15626	0.08592	0.00081	0.0058	0.00315	0.00315	0.00315	2.05529	2.05529
g__unclassified_p__Cyanobacteriota	0.00175	0.00416	0.0049	0.01178	0.5585	0.35714	0.6824	-0.01161	0.0021	-0.00315	-0.00315	0.00315	-1.48544	1.48544
g__Rheinheimera	0.00334	0.00504	0.00021	0.00022	0.01144	15.5878	0.04096	0.00143	0.00524	0.00313	0.00313	0.00313	3.96235	3.96235
g__Anaerobiospirillum	0.00523	0.00548	0.00211	0.00144	0.1683	2.47375	0.282	0.00107	0.00572	0.00311	0.00312	0.00312	1.3067	1.3067
g__Mesomycoplasma	0.00353	0.00547	0.00041	0.00075	0.0016	8.69527	0.01017	0.00128	0.00547	0.00312	0.00312	0.00312	3.12023	3.12023
g__Pseudoruminococcus	0.00579	0.00374	0.0089	0.00478	0.07925	0.65035	0.1677	-0.00633	0.00015	-0.00311	-0.00311	0.00311	-0.620712	0.620712
g__Superficieibacter	0.00036	0.00037	0.00347	0.00831	0.02988	0.10239	0.07983	-0.00876	-0.00012	-0.00312	-0.00311	0.00311	-3.28785	3.28785
g__Acidaminococcus	0.01111	0.00876	0.01421	0.00596	0.09305	0.7814	0.1905	-0.00804	0.00226	-0.00311	-0.0031	0.0031	-0.355867	0.355867
g__Gimesia	0.00447	0.00611	0.00137	0.00091	0.157	3.2514	0.2656	0.00093	0.00586	0.0031	0.0031	0.0031	1.70106	1.70106
g__unclassified_f__Herelleviridae	0.00663	0.00887	0.00353	0.00377	0.5585	1.88177	0.6824	-0.00079	0.00711	0.00311	0.0031	0.0031	0.91209	0.91209
g__Limosilactobacillus	0.00729	0.00394	0.01038	0.0061	0.136	0.70215	0.2363	-0.00715	0.00096	-0.00309	-0.00309	0.00309	-0.510149	0.510149
g__Marinobacterium	0.00348	0.01195	0.00039	0.00044	0.01741	8.90488	0.05319	0.0004	0.00802	0.00309	0.00309	0.00309	3.1546	3.1546
g__Solibaculum	0.01413	0.00786	0.0172	0.00601	0.1929	0.82171	0.3114	-0.00746	0.00196	-0.00307	-0.00307	0.00307	-0.283299	0.283299
g__Rhizopus	0.01091	0.04563	0.01398	0.02572	0.03955	0.78047	0.099	-0.0273	0.02363	-0.00307	-0.00307	0.00307	-0.357585	0.357585
g__Acidithiobacillus	0.0042	0.00376	0.00726	0.00657	0.22	0.57912	0.3471	-0.00768	0.00104	-0.00305	-0.00306	0.00306	-0.788066	0.788066
g__Candidatus_Arcanobacter	0.00321	0.00535	0.00015	0.00026	0.0442	21.0403	0.1082	0.00121	0.00537	0.00305	0.00306	0.00306	4.39509	4.39509
g__Desulfobacula	0.00466	0.00352	0.00161	0.00119	0.00438	2.89666	0.01926	0.00161	0.0047	0.00305	0.00305	0.00305	1.53439	1.53439
g__Candidatus_Syntrophosphaera	0.00309	0.00823	4e-05	0.00012	0.00013	79.6221	0.00228	0.00062	0.00714	0.00305	0.00305	0.00305	6.3151	6.3151
g__Serratia	0.01424	0.01329	0.01119	0.00629	0.9849	1.27257	0.9931	-0.00315	0.00933	0.00305	0.00305	0.00305	0.347745	0.347745
g__Gilliamella	0.00691	0.0048	0.00387	0.0029	0.09305	1.7864	0.1905	0.00051	0.00558	0.00304	0.00304	0.00304	0.837055	0.837055
g__Flavimaribacter	0.00333	0.00526	0.00029	0.00034	0.00237	11.6178	0.01325	0.00124	0.00525	0.00304	0.00304	0.00304	3.53826	3.53826
g__Candidatus_Avelusimicrobium	0.00396	0.0048	0.00092	0.00131	0.01085	4.30412	0.03929	0.00119	0.00525	0.00304	0.00304	0.00304	2.10572	2.10572
g__Anaeromyces	0.00405	0.01326	0.00101	0.00081	0.1254	4.02506	0.2251	-0.00039	0.00905	0.00305	0.00304	0.00304	2.00901	2.00901
g__Candidatus_Limimorpha	0.00339	0.00319	0.00035	0.00037	0.00031	9.60328	0.00368	0.00191	0.00439	0.00304	0.00304	0.00304	3.26353	3.26353
g__Desulfuribacillus	0.00493	0.00738	0.0019	0.00098	0.8355	2.59652	0.879	0.00037	0.00614	0.00303	0.00303	0.00303	1.37658	1.37658
g__Candidatus_Contendobacter	0.00538	0.00774	0.00235	0.00228	0.5334	2.29187	0.6582	2e-05	0.00648	0.00303	0.00303	0.00303	1.19653	1.19653
g__Candidatus_Onthoplasma	0.00319	0.00325	0.00016	0.00026	0.00018	19.5031	0.00274	0.00187	0.00439	0.00302	0.00303	0.00303	4.28563	4.28563
g__Erythrobacter	0.0033	0.00367	0.00028	0.00033	0.00084	11.6396	0.00655	0.00164	0.00445	0.00301	0.00302	0.00302	3.54096	3.54096
g__Enhydrobacter	0.00332	0.00448	0.00031	0.00047	0.00185	10.5928	0.01129	0.00153	0.00487	0.003	0.00301	0.00301	3.40501	3.40501
g__Candidatus_Aphodomorpha	0.00356	0.00385	0.00656	0.00393	0.01208	0.54246	0.0421	-0.00584	-0.00026	-0.003	-0.003	0.003	-0.882411	0.882411
g__Notoacmeibacter	0.0032	0.00635	0.00022	0.00035	0.00269	14.5693	0.01418	0.00091	0.00567	0.00298	0.00298	0.00298	3.86486	3.86486
g__Knoellia	0.00085	0.00186	0.00382	0.00738	0.08178	0.22222	0.1728	-0.0082	0.00039	-0.00297	-0.00297	0.00297	-2.16994	2.16994
g__Chlorokybus	0.00019	0.00038	0.00316	0.0053	0.00087	0.06036	0.00673	-0.00644	-0.00043	-0.00297	-0.00297	0.00297	-4.05026	4.05026
g__Candidatus_Methylomirabilis	0.00458	0.00281	0.00162	0.00173	0.0021	2.83576	0.01215	0.00144	0.00443	0.00297	0.00296	0.00296	1.50374	1.50374
g__Methylomarinovum	0.00311	0.00297	0.00015	0.00016	0.00031	20.3743	0.00368	0.00188	0.00417	0.00296	0.00296	0.00296	4.34868	4.34868
g__Desulfobacterium	0.00501	0.0052	0.00205	0.00136	0.06717	2.44022	0.1492	0.00107	0.00519	0.00296	0.00296	0.00296	1.28701	1.28701
g__Priestia	0.00991	0.0067	0.01286	0.00605	0.136	0.77055	0.2363	-0.0073	0.00155	-0.00295	-0.00295	0.00295	-0.37604	0.37604
g__Methanomassiliicoccus	0.00319	0.00328	0.00614	0.00233	0.00779	0.51926	0.03007	-0.00468	-0.00108	-0.00295	-0.00295	0.00295	-0.945471	0.945471
g__Backusella	0.003	0.01483	6e-05	0.00011	0.8684	53.3116	0.9059	-5e-05	0.00881	0.00294	0.00294	0.00294	5.73638	5.73638
g__Desulfofarcimen	0.00573	0.00444	0.0028	0.00236	0.06173	2.04329	0.1388	0.00049	0.0051	0.00293	0.00293	0.00293	1.03089	1.03089
g__unclassified_p__Candidatus_Diapherotrites	0.0033	0.00676	0.00037	0.00039	0.00125	8.85094	0.00855	0.0011	0.00588	0.00292	0.00293	0.00293	3.14583	3.14583
g__Desulfohalobium	0.00333	0.00378	0.00041	0.00075	0.00183	8.03473	0.01129	0.00156	0.00448	0.00292	0.00292	0.00292	3.00625	3.00625
g__Hypnocyclicus	0.00424	0.00341	0.00132	0.00099	0.0021	3.21449	0.01215	0.00158	0.00463	0.00292	0.00292	0.00292	1.68459	1.68459
g__Algihabitans	0.00297	0.00427	5e-05	0.00012	8e-05	64.9156	0.00168	0.0015	0.00458	0.00292	0.00292	0.00292	6.02049	6.02049
g__Aureibacter	0.00293	0.00283	1e-05	4e-05	1e-05	199.537	0.00117	0.00197	0.00402	0.00292	0.00292	0.00292	7.64051	7.64051
g__unclassified_f__Candidatus_Gastranaerophilaceae	0.00333	0.00507	0.00042	0.00041	0.05663	7.87837	0.13	0.00118	0.00495	0.00291	0.00291	0.00291	2.9779	2.9779
g__Paramagnetospirillum	0.00316	0.00483	0.00026	0.00046	0.00042	12.2313	0.00421	0.00136	0.00504	0.00291	0.0029	0.0029	3.61251	3.61251
g__Conexibacter	0.03038	0.10365	0.02748	0.0577	0.4171	1.10547	0.5493	-0.04803	0.0604	0.0029	0.0029	0.0029	0.14466	0.14466
g__Thermosinus	0.00319	0.00275	0.00609	0.00442	0.04346	0.5237	0.1068	-0.00588	-5e-05	-0.0029	-0.0029	0.0029	-0.933187	0.933187
g__Schizotequatrovirus	0.00289	0.01208	0	0	0.00506	0	0.02145	0.00022	0.00782	0.00289	0.00289	0.00289	#NUM!	#NUM!
g__Thermanaerothrix	0.0034	0.00657	0.00051	0.00059	0.2821	6.59912	0.4177	0.00065	0.00577	0.00288	0.00289	0.00289	2.72227	2.72227
g__Catalinimonas	0.00312	0.00276	0.00023	0.00025	0.00031	13.3685	0.00368	0.00183	0.004	0.00289	0.00289	0.00289	3.74077	3.74077
g__Candidatus_Galloscillospira	0.04001	0.0268	0.04289	0.02515	0.7484	0.93274	0.8117	-0.02117	0.01512	-0.00288	-0.00288	0.00288	-0.100453	0.100453
g__Desulfonema	0.00334	0.004	0.00048	0.00059	0.00055	7.0001	0.00496	0.00151	0.00459	0.00286	0.00286	0.00286	2.80738	2.80738
g__Alishewanella	0.00331	0.00514	0.00045	0.00097	0.01564	7.39195	0.05166	0.00103	0.00523	0.00286	0.00286	0.00286	2.88595	2.88595
g__Dethiobacter	0.0076	0.00458	0.00474	0.00232	0.1006	1.60283	0.1908	0.00071	0.00511	0.00286	0.00286	0.00286	0.680621	0.680621
g__Candidatus_Ordinivivax	0.0037	0.00329	0.00085	0.00103	0.00493	4.33893	0.02124	0.0015	0.00429	0.00285	0.00285	0.00285	2.11734	2.11734
g__Hydrotalea	0.0031	0.00897	0.00025	0.00054	0.00114	12.25	0.00821	0.00057	0.00656	0.00285	0.00285	0.00285	3.61471	3.61471
g__Rhodovibrio	0.003	0.00457	0.00016	0.00029	0.00055	18.7149	0.00496	0.0013	0.00472	0.00284	0.00284	0.00284	4.22612	4.22612
g__Tagaea	0.00291	0.00418	7e-05	0.0001	0.00674	40.9101	0.02727	0.00145	0.00447	0.00284	0.00284	0.00284	5.35438	5.35438
g__Xylanivirga	0.01801	0.00901	0.01518	0.00716	0.3751	1.18685	0.5166	-0.00281	0.00832	0.00284	0.00283	0.00283	0.247138	0.247138
g__Propionispira	0.01302	0.0325	0.01019	0.00528	0.01208	1.27756	0.0421	-0.00714	0.01762	0.00283	0.00283	0.00283	0.353391	0.353391
g__Candidatus_Limimonas	0.00355	0.00354	0.00072	0.00063	0.00036	4.91761	0.00401	0.00165	0.00441	0.00283	0.00283	0.00283	2.29796	2.29796
g__unclassified_p__Candidatus_Rokuibacteriota	0.00764	0.0049	0.01046	0.01132	0.6643	0.73094	0.7467	-0.01089	0.00357	-0.00282	-0.00282	0.00282	-0.452175	0.452175
g__Pseudosporangium	0.00072	0.00314	0.00354	0.00769	0.01878	0.20238	0.05637	-0.00873	0.00113	-0.00283	-0.00282	0.00282	-2.30486	2.30486
g__Nyctotherus	0	0	0.00282	0.00831	0.00277	0	0.01418	-0.00837	-2e-05	-0.00282	-0.00282	0.00282	#NUM!	#NUM!
g__Desulfocurvus	0.00894	0.00782	0.01174	0.00991	0.2993	0.76184	0.4387	-0.0102	0.00329	-0.0028	-0.0028	0.0028	-0.39244	0.39244
g__Arenibaculum	0.00324	0.00493	0.00044	0.00071	0.01654	7.42107	0.05218	0.00103	0.00476	0.0028	0.0028	0.0028	2.89163	2.89163
g__Prevotellamassilia	0.00286	0.00307	6e-05	9e-05	2e-05	45.417	0.00119	0.00174	0.00404	0.0028	0.0028	0.0028	5.50516	5.50516
g__Erwinia	0.00338	0.00773	0.00618	0.00707	0.09305	0.54647	0.1905	-0.00828	0.00219	-0.00281	-0.0028	0.0028	-0.871786	0.871786
g__unclassified_o__Methanophagales	0.00147	0.00162	0.00426	0.00851	0.9548	0.3442	0.9735	-0.00869	0.00088	-0.0028	-0.00279	0.00279	-1.53868	1.53868
g__Oleomonas	0.0028	0.0042	1e-05	2e-05	0.00034	319.784	0.00387	0.00133	0.00454	0.0028	0.00279	0.00279	8.32095	8.32095
g__Desulfoscipio	0.00276	0.00174	0.00553	0.00316	0.01655	0.49928	0.05218	-0.00484	-0.00063	-0.00277	-0.00277	0.00277	-1.00208	1.00208
g__Stylonychia	0.00063	0.00308	0.0034	0.00614	8e-05	0.18662	0.00168	-0.00716	0.00079	-0.00277	-0.00277	0.00277	-2.42182	2.42182
g__Luteolibacter	0.00086	0.00115	0.00362	0.0062	0.9849	0.23744	0.9931	-0.00729	0.00043	-0.00276	-0.00276	0.00276	-2.07437	2.07437
g__Candidatus_Midichloria	0.00342	0.0053	0.00066	0.00188	0.01791	5.20301	0.05452	0.00051	0.00541	0.00276	0.00276	0.00276	2.37935	2.37935
g__Blastococcus	0.00246	0.00615	0.00521	0.00782	0.03614	0.47275	0.09186	-0.00838	0.00193	-0.00274	-0.00275	0.00275	-1.08085	1.08085
g__Porcipelethomonas	0.00442	0.00389	0.00717	0.00466	0.09305	0.61622	0.1905	-0.00602	0.00052	-0.00275	-0.00275	0.00275	-0.698483	0.698483
g__Desulfuromonas	0.00572	0.00318	0.00846	0.00892	0.9248	0.67618	0.9497	-0.00885	0.00205	-0.00274	-0.00274	0.00274	-0.564521	0.564521
g__Sulfuricurvum	0.00662	0.0074	0.00388	0.00479	0.06173	1.7083	0.1388	-0.00131	0.00699	0.00275	0.00274	0.00274	0.772561	0.772561
g__unclassified_f__Candidatus_Binataceae	0.00407	0.00443	0.00133	0.00207	0.06173	3.06007	0.1388	0.00062	0.00471	0.00274	0.00274	0.00274	1.61356	1.61356
g__Rhodococcus	0.00517	0.00793	0.0079	0.01348	0.7484	0.65443	0.8117	-0.01347	0.00437	-0.00273	-0.00273	0.00273	-0.611689	0.611689
g__Nitrospina	0.0035	0.00487	0.00078	0.00095	0.01343	4.47756	0.0458	0.00104	0.00481	0.00272	0.00272	0.00272	2.16271	2.16271
g__Shackletoniella	0.00278	0.00345	6e-05	0.00012	0.00011	50.3226	0.00205	0.00151	0.00416	0.00273	0.00272	0.00272	5.65314	5.65314
g__Candidatus_Darwinimomas	0.00284	0.00205	0.00013	0.00016	7e-05	21.9052	0.00163	0.00195	0.00352	0.00271	0.00271	0.00271	4.4532	4.4532
g__Candidatus_Cacconaster	0.00562	0.00437	0.00292	0.00329	0.03969	1.92787	0.099	-8e-05	0.00526	0.00271	0.0027	0.0027	0.947008	0.947008
g__Streblomastix	0.00336	0.01666	0.00066	0.00086	0.02597	5.09852	0.07141	-0.00101	0.00956	0.0027	0.0027	0.0027	2.35008	2.35008
g__Stappia	0.00316	0.00484	0.00047	0.00038	0.00438	6.71771	0.01926	0.00105	0.00479	0.00269	0.00269	0.00269	2.74797	2.74797
g__Brochothrix	0.00035	0.0003	0.00304	0.00559	0.6234	0.11547	0.7108	-0.00601	0.00015	-0.00269	-0.00269	0.00269	-3.11441	3.11441
g__Candidatus_Limihabitans	0.00329	0.00314	0.00061	0.00075	0.00779	5.39751	0.03007	0.00145	0.00403	0.00268	0.00268	0.00268	2.43229	2.43229
g__unclassified_o__Candidatus_Peribacterales	0.00355	0.00795	0.00087	0.00183	0.01139	4.06311	0.04084	-0.00013	0.00616	0.00268	0.00268	0.00268	2.02258	2.02258
g__Candidatus_Avichristensenella	0.00492	0.00538	0.00225	0.00164	0.1929	2.19088	0.3114	0.00063	0.0052	0.00267	0.00267	0.00267	1.13151	1.13151
g__Defluviimonas	0.00331	0.0038	0.00066	0.0013	0.00073	5.00463	0.00602	0.00097	0.00447	0.00265	0.00265	0.00265	2.32326	2.32326
g__Algoriella	0.00286	0.00275	0.00021	0.00033	0.00035	13.4514	0.00401	0.00165	0.00376	0.00264	0.00265	0.00265	3.74968	3.74968
g__Marispirochaeta	0.00383	0.003	0.00119	0.00116	0.0021	3.21231	0.01215	0.00144	0.004	0.00264	0.00264	0.00264	1.68361	1.68361
g__Xylocopilactobacillus	8e-05	0.00017	0.00272	0.00292	4e-05	0.02968	0.00148	-0.0046	-0.00114	-0.00264	-0.00264	0.00264	-5.07437	5.07437
g__Candidatus_Merdivivens	0.00338	0.00317	0.00075	0.00117	0.00412	4.50276	0.01862	0.00134	0.00413	0.00263	0.00263	0.00263	2.17081	2.17081
g__Burkholderia	0.02224	0.01782	0.01962	0.01077	0.8356	1.13375	0.879	-0.00689	0.01241	0.00262	0.00262	0.00262	0.181103	0.181103
g__Pararhizobium	0.00301	0.00334	0.00039	0.00048	0.00096	7.70954	0.00718	0.00149	0.00399	0.00262	0.00262	0.00262	2.94664	2.94664
g__Mangrovimonas	0.00279	0.01241	0.00017	0.00045	0.00457	16.566	0.02004	-5e-05	0.0077	0.00263	0.00262	0.00262	4.05015	4.05015
g__Methanocorpusculum	0.00842	0.0044	0.01104	0.00433	0.07925	0.7621	0.1677	-0.00576	0.00051	-0.00263	-0.00262	0.00262	-0.391948	0.391948
g__Anaerobacillus	0.00341	0.00273	0.0008	0.00049	0.00064	4.28276	0.00547	0.00159	0.0037	0.00261	0.00261	0.00261	2.09854	2.09854
g__Methyloligella	0.00263	0.00231	2e-05	3e-05	1e-05	116.52	0.001	0.00183	0.00359	0.00261	0.00261	0.00261	6.86443	6.86443
g__unclassified_p__Candidatus_Shapirobacteria	0.00311	0.00413	0.00051	0.00053	0.0021	6.15489	0.01215	0.00128	0.00441	0.00261	0.0026	0.0026	2.62173	2.62173
g__Falcatimonas	0.00409	0.00707	0.00668	0.00544	0.06173	0.61342	0.1388	-0.00691	0.00169	-0.00258	-0.00259	0.00259	-0.705053	0.705053
g__Afifella	0.00282	0.00251	0.00023	0.0002	0.00011	12.4462	0.00205	0.00168	0.00349	0.00259	0.00259	0.00259	3.63764	3.63764
g__Candidatus_Protochlamydia	0.00397	0.00641	0.00138	0.00226	0.282	2.8793	0.4177	-3e-05	0.00549	0.00259	0.00259	0.00259	1.52572	1.52572
g__Desulfofustis	0.00506	0.0048	0.00248	0.00298	0.07925	2.04047	0.1677	-0.00023	0.0052	0.00258	0.00258	0.00258	1.0289	1.0289
g__Candidatus_Merdiplasma	0.00066	0.00068	0.00324	0.00245	0.0002	0.20494	0.00292	-0.00434	-0.00127	-0.00257	-0.00258	0.00258	-2.28673	2.28673
g__Sphaerochaeta	0.03116	0.02151	0.02858	0.015	1	1.09028	1	-0.00974	0.01393	0.00258	0.00258	0.00258	0.124699	0.124699
g__Tetrahymena	0.00316	0.00518	0.00061	0.00066	0.2345	5.21107	0.3594	0.00076	0.00453	0.00255	0.00255	0.00255	2.38158	2.38158
g__Gottfriedia	0.00421	0.00399	0.00166	0.00072	0.02472	2.54135	0.0684	0.00111	0.00437	0.00255	0.00255	0.00255	1.3456	1.3456
g__Entomomonas	0.00361	0.00305	0.00616	0.00623	0.1929	0.58533	0.3114	-0.00706	0.00108	-0.00256	-0.00255	0.00255	-0.772678	0.772678
g__Salinibacterium	0.00336	0.00403	0.00083	0.00118	0.00344	4.05179	0.01618	0.0011	0.00437	0.00253	0.00253	0.00253	2.01856	2.01856
g__Indioceanicola	0.00254	0.00408	1e-05	3e-05	0.00182	228.667	0.01124	0.00119	0.00432	0.00253	0.00253	0.00253	7.83711	7.83711
g__Pyrenophora	3e-05	7e-05	0.00256	0.00694	0.00052	0.01321	0.00477	-0.00719	-8e-05	-0.00252	-0.00253	0.00253	-6.24223	6.24223
g__Aquisalinus	0.00255	0.0039	2e-05	4e-05	0.00051	115.938	0.00474	0.00123	0.00427	0.00252	0.00253	0.00253	6.85721	6.85721
g__Cupriavidus	0.00909	0.0062	0.00657	0.00293	0.485	1.38292	0.609	-0.00037	0.00559	0.00252	0.00252	0.00252	0.467718	0.467718
g__Moritella	0.00394	0.01215	0.00142	0.00289	0.2993	2.77998	0.4387	-0.00159	0.0085	0.00252	0.00252	0.00252	1.47507	1.47507
g__Plenodomus	1.65394e-06	1e-05	0.00252	0.00714	1e-05	0.00066	0.00092	-0.00731	-6e-05	-0.00252	-0.00251835	0.00251835	-10.5652	10.5652
g__Terribacillus	0.0032	0.00407	0.00069	0.00073	0.0021	4.63324	0.01215	0.00115	0.00424	0.00251	0.00251	0.00251	2.21202	2.21202
g__Sulfurihydrogenibium	0.00401	0.01604	0.0015	0.00302	0.6371	2.67943	0.7214	-0.00206	0.01004	0.00251	0.00251	0.00251	1.42193	1.42193
g__Thiolinea	0.0029	0.01177	0.00039	0.0004	0.5839	7.36299	0.6902	-7e-05	0.00761	0.00251	0.00251	0.00251	2.88029	2.88029
g__Sutterella	0.00502	0.00343	0.00253	0.0012	0.06173	1.98098	0.1388	0.00102	0.00407	0.00249	0.00249	0.00249	0.986214	0.986214
g__Leminorella	0.00203	0.00158	0.00452	0.00379	0.04346	0.44807	0.1068	-0.00526	-0.00023	-0.0025	-0.00249	0.00249	-1.1582	1.1582
g__Planktomarina	0.00271	0.0029	0.00023	0.00025	0.00015	11.9996	0.00241	0.0015	0.00374	0.00248	0.00248	0.00248	3.58492	3.58492
g__Chlorobaculum	0.00261	0.00191	0.00013	0.00013	4e-05	20.1981	0.00144	0.00178	0.00318	0.00248	0.00248	0.00248	4.33615	4.33615
g__Rickettsiella	0.00251	0.00386	3e-05	5e-05	0.00211	97.3381	0.01221	0.00111	0.00412	0.00248	0.00248	0.00248	6.60493	6.60493
g__Tistlia	0.00258	0.00353	0.0001	0.00023	0.00033	24.72	0.00378	0.00123	0.00392	0.00248	0.00248	0.00248	4.6276	4.6276
g__Orenia	0.00592	0.00406	0.00345	0.00292	0.08593	1.71693	0.1797	-6e-05	0.00458	0.00247	0.00247	0.00247	0.779831	0.779831
g__Desulfotomaculum	0.00506	0.00384	0.00753	0.00456	0.1006	0.6723	0.1908	-0.00595	0.00071	-0.00247	-0.00247	0.00247	-0.572823	0.572823
g__Spirosoma	0.00539	0.00408	0.00292	0.00282	0.07925	1.84532	0.1677	1e-05	0.00474	0.00247	0.00247	0.00247	0.883871	0.883871
g__Prolixibacter	0.00288	0.00305	0.00042	0.00071	0.00123	6.77263	0.00855	0.0014	0.00384	0.00245	0.00246	0.00246	2.75972	2.75972
g__Niallia	0.01003	0.01105	0.00758	0.0041	0.9549	1.32281	0.9735	-0.00216	0.00777	0.00245	0.00245	0.00245	0.403606	0.403606
g__Candidatus_Scatavimonas	0.00701	0.0049	0.00946	0.00455	0.136	0.74165	0.2363	-0.0056	0.00104	-0.00244	-0.00245	0.00245	-0.43119	0.43119
g__Enhygromyxa	0.00018	0.00063	0.00263	0.00566	0.01645	0.06814	0.05218	-0.00631	-8e-05	-0.00245	-0.00245	0.00245	-3.87535	3.87535
g__Jiella	0.00256	0.00371	0.00012	0.00011	0.00023	21.3834	0.00312	0.00127	0.0041	0.00244	0.00244	0.00244	4.41842	4.41842
g__Fluviicola	0.00264	0.00256	0.0002	0.00022	0.00011	13.2051	0.00205	0.00154	0.0035	0.00244	0.00244	0.00244	3.72303	3.72303
g__Anaerophilus	0.00295	0.00278	0.00538	0.00392	0.07301	0.54802	0.1575	-0.00535	0.00016	-0.00243	-0.00243	0.00243	-0.8677	0.8677
g__Aeromicrobium	0.00255	0.00581	0.00498	0.00799	0.1264	0.51251	0.2251	-0.00858	0.00236	-0.00243	-0.00243	0.00243	-0.964348	0.964348
g__Anaerovirgula	0.00723	0.00517	0.00965	0.00403	0.136	0.74951	0.2363	-0.00553	0.00101	-0.00242	-0.00242	0.00242	-0.41598	0.41598
g__Haematospirillum	0.00244	0.00359	2e-05	3e-05	2e-05	142.822	0.00136	0.00122	0.00387	0.00243	0.00242	0.00242	7.15807	7.15807
g__Cycloclasticus	0.0001	0.00021	0.0025	0.00232	0.00045	0.04044	0.00434	-0.00389	-0.00108	-0.0024	-0.0024	0.0024	-4.62807	4.62807
g__Hominicoprocola	0.0039	0.00299	0.0015	0.00109	0.02028	2.6058	0.05938	0.00111	0.00371	0.0024	0.0024	0.0024	1.38173	1.38173
g__Rhodospirillum	0.00451	0.00491	0.00212	0.00291	0.06717	2.13181	0.1492	-0.00024	0.00492	0.0024	0.00239	0.00239	1.09208	1.09208
g__Geminicoccus	0.00348	0.00437	0.00109	0.00125	0.04754	3.19665	0.1144	0.00063	0.00432	0.00239	0.00239	0.00239	1.67656	1.67656
g__Neochlamydia	0.00241	0.00413	2e-05	5e-05	0.0155	127.376	0.05134	0.00094	0.00408	0.00239	0.00239	0.00239	6.99295	6.99295
g__Fodinicurvata	0.00365	0.00546	0.00127	0.00206	0.2345	2.88179	0.3594	0.00012	0.0048	0.00238	0.00238	0.00238	1.52697	1.52697
g__Candidatus_Caccalectryoclostridium	0.00302	0.00389	0.00064	0.00039	0.05193	4.72926	0.1211	0.00097	0.00406	0.00238	0.00238	0.00238	2.24161	2.24161
g__Salinicoccus	0.00314	0.01074	0.00076	0.00052	0.8062	4.12313	0.8549	-9e-05	0.00689	0.00238	0.00238	0.00238	2.04374	2.04374
g__Biomaibacter	0.00327	0.00365	0.00093	0.0008	0.00324	3.50154	0.01553	0.00109	0.00413	0.00234	0.00234	0.00234	1.80799	1.80799
g__Candidatus_Choladocola	0.01365	0.00736	0.01598	0.0082	0.2497	0.85462	0.3786	-0.00826	0.00282	-0.00232	-0.00233	0.00233	-0.226645	0.226645
g__Amycolatopsis	0.00833	0.02649	0.006	0.0077	0.4171	1.38845	0.5493	-0.00695	0.01497	0.00233	0.00233	0.00233	0.473475	0.473475
g__Bhargavaea	0.0026	0.00482	0.00028	0.00015	0.01343	9.26522	0.0458	0.00094	0.0045	0.00232	0.00232	0.00232	3.21183	3.21183
g__Harryflintia	0.09096	0.06397	0.09327	0.05724	0.8651	0.97522	0.9028	-0.04598	0.03765	-0.00231	-0.00231	0.00231	-0.0362004	0.0362004
g__Caldanaerobacter	0.00593	0.00357	0.00362	0.00276	0.09305	1.63745	0.1905	1e-05	0.00448	0.00231	0.00231	0.00231	0.711451	0.711451
g__Terrimonas	0.00272	0.00959	0.00041	0.00088	0.01734	6.64885	0.05306	-9e-05	0.00631	0.00231	0.00231	0.00231	2.7331	2.7331
g__Roseovarius	0.0047	0.00858	0.00239	0.00152	0.7199	1.96329	0.7948	-0.00059	0.00604	0.00231	0.00231	0.00231	0.973273	0.973273
g__Microbacter	0.00248	0.00287	0.00017	0.00049	8e-05	14.6875	0.00168	0.00125	0.00356	0.00231	0.00231	0.00231	3.87652	3.87652
g__Caenorhabditis	0	0	0.00231	0.00605	0.00277	0	0.01418	-0.00639	0	-0.00231	-0.00231	0.00231	#NUM!	#NUM!
g__Candidatus_Cyrtobacter	0.0023	0.00465	0	0	0.00203	0	0.01202	0.00081	0.00435	0.0023	0.0023	0.0023	#NUM!	#NUM!
g__Orrella	0.00238	0.00297	9e-05	0.00013	5e-05	26.5264	0.00163	0.00127	0.00352	0.00229	0.00229	0.00229	4.72936	4.72936
g__Succiniclasticum	0.00152	0.00106	0.00381	0.00246	0.00779	0.39823	0.03007	-0.00379	-0.00082	-0.0023	-0.00229	0.00229	-1.32833	1.32833
g__Caulobacter	0.00316	0.00384	0.00087	0.0007	0.01833	3.63363	0.05526	0.001	0.00385	0.00229	0.00229	0.00229	1.86141	1.86141
g__Tequintavirus	0.00229	0.01008	0	0	0.232	0	0.3579	1e-05	0.00653	0.00229	0.00229	0.00229	#NUM!	#NUM!
g__Limibacillus	0.00263	0.00377	0.00034	0.00086	0.00109	7.74466	0.00796	0.00085	0.004	0.00229	0.00229	0.00229	2.9532	2.9532
g__Saezia	0.00161	0.00149	0.0039	0.00366	0.01208	0.41295	0.0421	-0.00485	-0.00031	-0.00229	-0.00229	0.00229	-1.27596	1.27596
g__Dyadobacter	0.00335	0.00264	0.00107	0.00092	0.00389	3.14876	0.01761	0.00114	0.00343	0.00229	0.00228	0.00228	1.65478	1.65478
g__Moorella	0.02081	0.012	0.01853	0.02813	0.05665	1.12266	0.13	-0.0185	0.01618	0.00228	0.00228	0.00228	0.166921	0.166921
g__Zhengella	0.0023	0.00552	3e-05	6e-05	0.00029	69.9689	0.00351	0.0005	0.00446	0.00227	0.00227	0.00227	6.12864	6.12864
g__Rhodovulum	0.00466	0.00685	0.0024	0.00228	0.7771	1.94352	0.8343	-0.0005	0.00548	0.00226	0.00226	0.00226	0.958672	0.958672
g__Sangeribacter	0.00464	0.00688	0.00238	0.00404	0.08584	1.95028	0.1797	-0.00135	0.00591	0.00226	0.00226	0.00226	0.963681	0.963681
g__Saccharococcus	0.00226	0.00529	0	0	0.00025	0	0.00312	0.00075	0.00453	0.00226	0.00226	0.00226	#NUM!	#NUM!
g__Dethiosulfatibacter	0.01239	0.01169	0.01014	0.00424	0.7484	1.22208	0.8117	-0.0023	0.00826	0.00225	0.00225	0.00225	0.289339	0.289339
g__Variibacter	0.00315	0.01094	0.0009	0.00174	0.05665	3.51741	0.13	-0.00086	0.00724	0.00226	0.00225	0.00225	1.81451	1.81451
g__Gemella	0.0053	0.00259	0.00305	0.00146	0.01833	1.73954	0.05526	0.001	0.00364	0.00226	0.00225	0.00225	0.798706	0.798706
g__Candidatus_Pelethomonas	0.00214	0.00126	0.00439	0.00244	0.01085	0.48836	0.03929	-0.00378	-0.00065	-0.00225	-0.00225	0.00225	-1.03398	1.03398
g__Roseobacter	0.00261	0.0035	0.00036	0.00066	0.0002	7.1958	0.00292	0.00103	0.00377	0.00225	0.00225	0.00225	2.84716	2.84716
g__Megalodesulfovibrio	0.00511	0.00771	0.00287	0.00155	0.6919	1.77805	0.771	-0.00031	0.00591	0.00224	0.00224	0.00224	0.830296	0.830296
g__Nucisporomicrobium	0.00053	0.00232	0.00277	0.00573	0.00437	0.19056	0.01926	-0.00651	0.00061	-0.00224	-0.00224	0.00224	-2.39168	2.39168
g__Dorisvirus	0.00224	0.01139	0	0	0.232	0	0.3579	6.019e-07	0.00671	0.00224	0.00224	0.00224	#NUM!	#NUM!
g__Sinorhizobium	0.00534	0.00522	0.00311	0.00424	0.04754	1.7165	0.1144	-0.00159	0.0051	0.00223	0.00223	0.00223	0.77947	0.77947
g__Labrenzia	0.00243	0.00252	0.0002	0.00031	0.00015	11.8987	0.00241	0.0013	0.0032	0.00222	0.00223	0.00223	3.57273	3.57273
g__Rhodoferax	0.00798	0.00593	0.00575	0.00399	0.4171	1.38734	0.5493	-0.00138	0.00539	0.00223	0.00223	0.00223	0.472321	0.472321
g__unclassified_c__Alphaproteobacteria	0.00367	0.00465	0.00145	0.00178	0.3172	2.52466	0.4515	0.0002	0.00454	0.00222	0.00222	0.00222	1.33609	1.33609
g__Alachuavirus	0.00222	0.00592	0	0	0.03518	0	0.09003	0.00041	0.00466	0.00222	0.00222	0.00222	#NUM!	#NUM!
g__Caminicella	0.00681	0.00459	0.00903	0.01064	0.7484	0.75438	0.8117	-0.01003	0.00358	-0.00222	-0.00222	0.00222	-0.406637	0.406637
g__Thioalkalivibrio	0.00281	0.00372	0.00059	0.00049	0.00064	4.77463	0.00547	0.00093	0.00394	0.00222	0.00222	0.00222	2.25539	2.25539
g__Segetibacter	0.00277	0.01097	0.00055	0.00044	0.6918	5.04409	0.771	-0.0002	0.00665	0.00222	0.00222	0.00222	2.33459	2.33459
g__Myroides	0.00298	0.00208	0.00077	0.00056	0.0011	3.84901	0.00796	0.00134	0.00311	0.0022	0.00221	0.00221	1.94449	1.94449
g__Flavipsychrobacter	0.00278	0.007	0.00057	0.00064	0.06173	4.90167	0.1388	0.00025	0.00532	0.00221	0.00221	0.00221	2.29327	2.29327
g__Paludibacterium	0.00069	0.0009	0.0029	0.00297	0.00344	0.23696	0.01618	-0.00419	-0.00053	-0.00221	-0.00221	0.00221	-2.07728	2.07728
g__Limnobaculum	0.00614	0.01858	0.00393	0.0023	0.01085	1.56201	0.03929	-0.00297	0.01019	0.00221	0.00221	0.00221	0.643404	0.643404
g__Nonomuraea	0.00267	0.00559	0.00487	0.00602	0.2655	0.54825	0.3985	-0.00665	0.00198	-0.0022	-0.0022	0.0022	-0.867094	0.867094
g__Pantoea	0.00243	0.003	0.00463	0.00516	0.04754	0.52496	0.1144	-0.00567	0.00064	-0.0022	-0.0022	0.0022	-0.929721	0.929721
g__unclassified_c__Candidatus_Jordarchaeia	0.00225	0.00402	5e-05	6e-05	0.06681	41.5781	0.1489	0.0009	0.00379	0.0022	0.0022	0.0022	5.37775	5.37775
g__Ignatzschineria	0.00022	0.00028	0.00242	0.00468	0.0016	0.09129	0.01017	-0.00541	-0.00029	-0.0022	-0.0022	0.0022	-3.4534	3.4534
g__Nitrosarchaeum	0.00039	0.0011	0.00259	0.00451	0.00109	0.15035	0.00796	-0.00552	-9e-05	-0.0022	-0.0022	0.0022	-2.7336	2.7336
g__Caldicellulosiruptor	0.00792	0.00472	0.00573	0.00493	0.07925	1.382	0.1677	-0.00158	0.00523	0.00219	0.00219	0.00219	0.466758	0.466758
g__Leptolinea	0.0074	0.00675	0.00521	0.00233	0.8651	1.42026	0.9028	-0.00053	0.005	0.00219	0.00219	0.00219	0.506155	0.506155
g__Methylocystis	0.00286	0.00255	0.00067	0.00082	0.00084	4.255	0.00655	0.00115	0.00344	0.00219	0.00219	0.00219	2.08916	2.08916
g__Candidatus_Ventricola	0.01534	0.01236	0.01316	0.00549	0.8949	1.16586	0.9258	-0.0034	0.00848	0.00218	0.00218	0.00218	0.221395	0.221395
g__Brevibacillus	0.0219	0.0112	0.02407	0.00966	0.6919	0.90984	0.771	-0.00903	0.0049	-0.00217	-0.00217	0.00217	-0.136315	0.136315
g__Thermacetogenium	0.00347	0.00348	0.0013	0.00104	0.1264	2.66305	0.2251	0.00072	0.00379	0.00217	0.00217	0.00217	1.41308	1.41308
g__Candidatus_Nardonella	1e-05	5e-05	0.00218	0.0058	0.1523	0.00577	0.2601	-0.00608	-1e-05	-0.00217	-0.00217	0.00217	-7.43721	7.43721
g__Hominifimenecus	0.00463	0.00471	0.00246	0.00227	0.1462	1.88154	0.2507	-3e-05	0.00441	0.00217	0.00217	0.00217	0.911914	0.911914
g__Niastella	0.00257	0.00685	0.0004	0.00049	0.01655	6.41211	0.05218	0.00047	0.00511	0.00217	0.00217	0.00217	2.6808	2.6808
g__Niveispirillum	0.00235	0.00315	0.00019	0.00037	0.00094	12.1385	0.00718	0.00106	0.00337	0.00215	0.00216	0.00216	3.60151	3.60151
g__Oceanivirga	0.00022	0.00023	0.00238	0.00331	0.00389	0.09127	0.01761	-0.00445	-0.0005	-0.00216	-0.00216	0.00216	-3.45372	3.45372
g__unclassified_p__Halobacteriota	0.00217	0.00493	1e-05	4e-05	6e-05	168.545	0.00163	0.00064	0.00425	0.00216	0.00216	0.00216	7.39699	7.39699
g__Albitalea	0.00011	0.00026	0.00226	0.00501	0.0504	0.04768	0.1192	-0.00557	-1e-05	-0.00215	-0.00215	0.00215	-4.39047	4.39047
g__Qingdaovirus	0.00215	0.01095	0	0	0.4253	0	0.5493	0	0.00644	0.00215	0.00215	0.00215	#NUM!	#NUM!
g__Hanseniaspora	0.00219	0.0081	4e-05	0.00011	0.2097	57.7221	0.3336	1e-05	0.00578	0.00215	0.00215	0.00215	5.85105	5.85105
g__Prescottella	0.00377	0.00756	0.00163	0.00232	0.9849	2.31482	0.9931	-0.00074	0.00561	0.00214	0.00214	0.00214	1.2109	1.2109
g__Parafilimonas	0.00257	0.00728	0.00043	0.00051	0.02024	5.94394	0.05938	0.00032	0.00541	0.00214	0.00214	0.00214	2.57142	2.57142
g__Bombiscardovia	0.00014	0.00016	0.00228	0.00537	0.09176	0.06205	0.1897	-0.00587	-8e-05	-0.00214	-0.00214	0.00214	-4.01042	4.01042
g__Gallionella	0.00348	0.00317	0.00135	0.00085	0.05665	2.57074	0.13	0.0009	0.00354	0.00212	0.00213	0.00213	1.36218	1.36218
g__Minwuia	0.0022	0.00289	7e-05	9e-05	0.00017	32.8969	0.00265	0.00116	0.00337	0.00214	0.00213	0.00213	5.03988	5.03988
g__Rhodopseudomonas	0.00349	0.00294	0.00137	0.00226	0.01343	2.54807	0.0458	0.00014	0.00387	0.00212	0.00212	0.00212	1.3494	1.3494
g__Paremcibacter	0.00229	0.00343	0.00017	0.00022	0.03547	13.8627	0.09057	0.00089	0.00355	0.00213	0.00212	0.00212	3.79313	3.79313
g__Desulfonauticus	0.00815	0.00636	0.00603	0.00179	0.7771	1.35102	0.8343	-0.00056	0.0048	0.00212	0.00212	0.00212	0.434049	0.434049
g__Scytonema	0.0017	0.00175	0.00381	0.00584	0.6643	0.44703	0.7467	-0.00627	0.0009	-0.00211	-0.00211	0.00211	-1.16156	1.16156
g__Kaistia	0.00309	0.00258	0.00098	0.00094	0.01655	3.14142	0.05218	0.00101	0.00323	0.00211	0.00211	0.00211	1.65142	1.65142
g__Roseiarcus	0.00299	0.00257	0.00088	0.00133	0.00305	3.41669	0.01511	0.00079	0.00341	0.00212	0.00211	0.00211	1.7726	1.7726
g__Pectobacterium	0.00354	0.00627	0.00143	0.00165	0.157	2.47965	0.2656	-4e-05	0.00505	0.00211	0.00211	0.00211	1.31014	1.31014
g__Aquimarina	0.00279	0.00256	0.00068	0.00049	0.00554	4.11261	0.02294	0.00116	0.00318	0.00211	0.00211	0.00211	2.04005	2.04005
g__Candidatus_Vecturithrix	0.00871	0.01004	0.00661	0.0059	0.7484	1.31738	0.8117	-0.00262	0.00726	0.0021	0.0021	0.0021	0.397672	0.397672
g__Ilyobacter	0.00554	0.0035	0.00344	0.00422	0.04346	1.60966	0.1068	-0.00126	0.00464	0.0021	0.0021	0.0021	0.686756	0.686756
g__Bellilinea	0.0029	0.00583	0.0008	0.00055	0.4063	3.61524	0.5493	0.00047	0.00481	0.0021	0.0021	0.0021	1.85409	1.85409
g__Malonomonas	0.00212	0.00308	2e-05	4e-05	0.00016	107.948	0.00249	0.00108	0.00333	0.0021	0.0021	0.0021	6.75419	6.75419
g__Jilunia	0.00579	0.00666	0.00789	0.00935	0.7484	0.73407	0.8117	-0.00939	0.00405	-0.0021	-0.0021	0.0021	-0.44601	0.44601
g__Francisella	0.00639	0.00997	0.00429	0.00891	0.136	1.48726	0.2363	-0.00562	0.00856	0.00209	0.0021	0.0021	0.572657	0.572657
g__Candidatus_Fukatsuia	0.00212	0.00365	3e-05	0.0001	0.03118	65.2414	0.08256	0.00081	0.00363	0.00209	0.00209	0.00209	6.02772	6.02772
g__Baekduia	0.01692	0.06275	0.01484	0.03041	0.9849	1.14044	0.9931	-0.02839	0.03689	0.00208	0.00208	0.00208	0.189591	0.189591
g__Neptunomonas	0.00237	0.00282	0.00029	0.00054	0.00064	8.25488	0.00547	0.00097	0.00323	0.00208	0.00208	0.00208	3.04525	3.04525
g__Paenisporosarcina	0.00242	0.00342	0.00034	0.00024	0.01085	7.08741	0.03929	0.00099	0.00363	0.00208	0.00208	0.00208	2.82526	2.82526
g__Clostridioides	0.27476	0.11413	0.27683	0.09236	0.6371	0.9925	0.7214	-0.07223	0.0743	-0.00207	-0.00207	0.00207	-0.010861	0.010861
g__Candidatus_Scubalenecus	0.00077	0.00112	0.00284	0.00489	0.02999	0.26937	0.07983	-0.00537	2e-05	-0.00208	-0.00207	0.00207	-1.89234	1.89234
g__Candidatus_Izemoplasma	0.00303	0.00498	0.00096	0.00116	0.3172	3.17566	0.4515	0.00034	0.00449	0.00208	0.00207	0.00207	1.66706	1.66706
g__Aequorivita	0.00257	0.00518	0.0005	0.00057	0.03297	5.14922	0.08592	0.00059	0.0043	0.00207	0.00207	0.00207	2.36435	2.36435
g__Elsinoe	0.00206	0.00946	0	0	0.232	0	0.3579	8.319e-07	0.00598	0.00206	0.00206	0.00206	#NUM!	#NUM!
g__Bifidobacterium	0.01653	0.00886	0.01859	0.00886	0.2497	0.88882	0.3786	-0.00881	0.00433	-0.00207	-0.00206	0.00206	-0.170037	0.170037
g__Chelativorans	0.00351	0.00447	0.00146	0.00113	0.1264	2.41242	0.2251	0.00041	0.00393	0.00206	0.00205	0.00205	1.27048	1.27048
g__unclassified_p__Candidatus_Heimdallarchaeota	0.00249	0.00225	0.00044	0.00043	0.00023	5.65845	0.00312	0.00119	0.0031	0.00205	0.00205	0.00205	2.50041	2.50041
g__unclassified_p__Candidatus_Poribacteria	0.01257	0.01124	0.01052	0.00455	0.5585	1.19532	0.6824	-0.00292	0.00741	0.00206	0.00205	0.00205	0.257397	0.257397
g__unclassified_p__Candidatus_Nealsoniibacteriota	0.00228	0.00198	0.00433	0.00792	0.8949	0.52582	0.9258	-0.00791	0.00146	-0.00205	-0.00205	0.00205	-0.927359	0.927359
g__Keratinibaculum	0.00327	0.00255	0.00123	0.00113	0.01027	2.65195	0.03762	0.00084	0.00323	0.00204	0.00204	0.00204	1.40705	1.40705
g__Acuticoccus	0.00253	0.00251	0.00049	0.00031	0.00438	5.15749	0.01926	0.00118	0.0031	0.00204	0.00204	0.00204	2.36667	2.36667
g__Dhillonvirus	0	0	0.00204	0.00612	0.1022	0	0.1908	-0.00612	0	-0.00204	-0.00204	0.00204	#NUM!	#NUM!
g__Arabiibacter	0.01098	0.01072	0.01301	0.01573	0.7484	0.84366	0.8117	-0.01293	0.00746	-0.00204	-0.00203	0.00203	-0.245266	0.245266
g__Candidatus_Kentron	0.00365	0.00321	0.00162	0.00137	0.04754	2.24717	0.1144	0.00056	0.00357	0.00203	0.00203	0.00203	1.16811	1.16811
g__Brettanomyces	0.00205	0.00882	2e-05	4e-05	0.8575	113.31	0.8994	-1e-05	0.00549	0.00203	0.00203	0.00203	6.82413	6.82413
g__Syntrophus	0.00911	0.00903	0.00708	0.01102	0.05193	1.28641	0.1211	-0.00706	0.00844	0.00203	0.00203	0.00203	0.363351	0.363351
g__Maritalea	0.00228	0.00277	0.00026	0.0002	0.01208	8.6575	0.0421	0.00106	0.00316	0.00202	0.00202	0.00202	3.11395	3.11395
g__Propylenella	0.00216	0.00202	0.00014	0.00013	0.00011	15.7947	0.00205	0.00127	0.00283	0.00202	0.00202	0.00202	3.98137	3.98137
g__Collimonas	0.00315	0.00314	0.00114	0.00084	0.04754	2.76967	0.1144	0.00083	0.00335	0.00201	0.00201	0.00201	1.46971	1.46971
g__Polynucleobacter	0.00466	0.00826	0.00265	0.00158	0.157	1.75924	0.2656	-0.00093	0.00586	0.00201	0.00201	0.00201	0.814952	0.814952
g__Thermotalea	0.00419	0.00265	0.00218	0.00145	0.01833	1.92617	0.05526	0.00071	0.00342	0.00202	0.00201	0.00201	0.945735	0.945735
g__Aeoliella	0.00236	0.00611	0.00036	0.00069	0.00779	6.58695	0.03007	0.00031	0.00479	0.002	0.002	0.002	2.71961	2.71961
g__Nodularia	0.00024	0.00037	0.00224	0.00618	0.2172	0.10834	0.3446	-0.00618	0.00018	-0.002	-0.002	0.002	-3.20636	3.20636
g__Candidatus_Formimonas	0.01859	0.01772	0.01659	0.00799	0.6919	1.12031	0.771	-0.00572	0.01068	0.002	0.002	0.002	0.163898	0.163898
g__Aliarcobacter	0.00606	0.00422	0.00407	0.00568	0.01085	1.48746	0.03929	-0.0023	0.00538	0.00198	0.00199	0.00199	0.572851	0.572851
g__Candidatus_Nephrothrix	0.00017	0.00024	0.00216	0.00554	0.5198	0.07725	0.645	-0.00583	0.00016	-0.00199	-0.00199	0.00199	-3.69432	3.69432
g__unclassified_f__Acaryochloridaceae	0.00201	0.00432	2e-05	4e-05	0.00892	94.2444	0.03344	0.00067	0.00369	0.00199	0.00199	0.00199	6.55833	6.55833
g__Garciella	0.01692	0.01261	0.01494	0.02734	0.06173	1.13226	0.1388	-0.01814	0.01517	0.00198	0.00198	0.00198	0.179205	0.179205
g__Arcobacter	0.00186	0.00108	0.00384	0.00334	0.1087	0.48504	0.2	-0.00428	-0.00015	-0.00198	-0.00198	0.00198	-1.04382	1.04382
g__Sphaerotilus	0.00214	0.00165	0.00016	0.00025	3e-05	13.3572	0.00136	0.0014	0.00267	0.00198	0.00198	0.00198	3.73954	3.73954
g__Alphabaculovirus	6e-05	0.00019	0.00204	0.00528	0.01311	0.02768	0.04517	-0.00564	1e-05	-0.00198	-0.00198	0.00198	-5.17501	5.17501
g__unclassified_p__Nanoarchaeota	0.00599	0.01312	0.00796	0.01402	0.6104	0.752	0.6972	-0.01377	0.00668	-0.00198	-0.00197	0.00197	-0.411195	0.411195
g__Thermohalobaculum	0.00249	0.00391	0.00052	0.00066	0.01415	4.81195	0.04793	0.00061	0.00362	0.00197	0.00197	0.00197	2.26662	2.26662
g__Geofilum	0.0022	0.00178	0.00023	0.00035	0.0002	9.41477	0.00292	0.00127	0.00262	0.00197	0.00197	0.00197	3.23493	3.23493
g__Fastidiosipila	0.00213	0.0022	0.00409	0.00274	0.02241	0.52109	0.0641	-0.00409	-9e-05	-0.00196	-0.00196	0.00196	-0.940396	0.940396
g__Desulfonatronospira	0.00299	0.00328	0.00103	0.00112	0.03969	2.91806	0.099	0.00056	0.00351	0.00197	0.00196	0.00196	1.54501	1.54501
g__Alkalithermobacter	0.00219	0.00346	0.00023	0.00027	0.00223	9.73208	0.01284	0.00078	0.00351	0.00197	0.00196	0.00196	3.28275	3.28275
g__Tepidimicrobium	0.004	0.00243	0.00595	0.00385	0.08593	0.67195	0.1797	-0.00466	0.00026	-0.00195	-0.00195	0.00195	-0.573574	0.573574
g__Phlebovirus	0	0	0.00195	0.00495	0.00277	0	0.01418	-0.00535	0	-0.00195	-0.00195	0.00195	#NUM!	#NUM!
g__Nocardia	0.00463	0.00957	0.00657	0.00838	0.07301	0.70547	0.1575	-0.00878	0.00396	-0.00194	-0.00194	0.00194	-0.503343	0.503343
g__Fenollaria	0.00223	0.00349	0.00029	0.00057	0.00252	7.76299	0.0139	0.00079	0.00357	0.00195	0.00194	0.00194	2.95661	2.95661
g__Faecalibacter	0.00206	0.00206	0.00012	0.00013	7e-05	17.1113	0.00163	0.00122	0.00282	0.00194	0.00194	0.00194	4.09687	4.09687
g__Lacibacter	0.00217	0.00648	0.00023	0.00031	0.00389	9.62385	0.01761	0.00038	0.00529	0.00195	0.00194	0.00194	3.26661	3.26661
g__Youxingia	0.0546	0.03756	0.05267	0.0218	0.7484	1.0367	0.8117	-0.01774	0.02369	0.00193	0.00193	0.00193	0.0519985	0.0519985
g__Sandaracinus	0.00221	0.00477	0.00028	0.00033	0.02999	7.87955	0.07983	0.00046	0.00396	0.00193	0.00193	0.00193	2.97811	2.97811
g__Aquamicrobium	0.00215	0.00209	0.00022	0.00023	0.00197	9.88259	0.0119	0.00115	0.00286	0.00193	0.00193	0.00193	3.30489	3.30489
g__Phycomyces	7e-05	0.00021	0.002	0.00354	0.00075	0.03398	0.00607	-0.00423	-0.00021	-0.00193	-0.00193	0.00193	-4.87917	4.87917
g__Sporanaerobacter	0.01087	0.00937	0.00894	0.00482	0.9248	1.21668	0.9497	-0.00265	0.0071	0.00194	0.00193	0.00193	0.28295	0.28295
g__Haemophilus	0.00327	0.00156	0.00519	0.00563	0.485	0.63101	0.609	-0.00586	0.00096	-0.00191	-0.00192	0.00192	-0.664265	0.664265
g__Atopobium	0.00375	0.00264	0.00183	0.00108	0.04752	2.05235	0.1144	0.00065	0.00322	0.00192	0.00192	0.00192	1.03728	1.03728
g__Acetitomaculum	0.001	0.00151	0.00292	0.00168	0.00162	0.34122	0.01018	-0.00324	-0.00068	-0.00192	-0.00192	0.00192	-1.55123	1.55123
g__Campylobacter	0.02283	0.00821	0.02092	0.01338	0.2345	1.09117	0.3594	-0.00688	0.01028	0.00191	0.00191	0.00191	0.125876	0.125876
g__Fonticula	0.00201	0.00498	0.00011	0.00017	0.1057	19.0375	0.1958	0.00032	0.004	0.0019	0.0019	0.0019	4.25078	4.25078
g__Gongronella	4e-05	0.00013	0.00194	0.0038	3e-05	0.01897	0.00144	-0.00446	-0.00013	-0.0019	-0.0019	0.0019	-5.72014	5.72014
g__Apibacter	0.0025	0.00223	0.00062	0.00089	0.00238	4.0464	0.01325	0.00099	0.00281	0.00189	0.00188	0.00188	2.01664	2.01664
g__Methanoregula	0.00277	0.00235	0.00089	0.00055	0.01343	3.11746	0.0458	0.00095	0.00284	0.00188	0.00188	0.00188	1.64037	1.64037
g__Vermiphilus	0	0	0.00187	0.00396	0.01676	0	0.05218	-0.00496	0	-0.00187	-0.00187	0.00187	#NUM!	#NUM!
g__unclassified_p__Candidatus_Thermoplasmatota	0.00259	0.00351	0.00072	0.00126	0.00696	3.58122	0.0278	0.0005	0.00358	0.00187	0.00187	0.00187	1.84045	1.84045
g__Entrophospora	0.03191	0.16181	0.03378	0.0605	0.00028	0.94474	0.00347	-0.06725	0.08168	-0.00186	-0.00187	0.00187	-0.0820108	0.0820108
g__Rubrivirga	0.00236	0.00331	0.0005	0.00065	0.06173	4.71028	0.1388	0.00055	0.00325	0.00186	0.00186	0.00186	2.23581	2.23581
g__Amphritea	0.00216	0.00372	0.0003	0.00067	0.00236	7.23071	0.01325	0.00059	0.00341	0.00186	0.00186	0.00186	2.85414	2.85414
g__Cronobacter	0.00329	0.01112	0.00143	0.00212	0.6371	2.29437	0.7214	-0.00145	0.00683	0.00186	0.00186	0.00186	1.1981	1.1981
g__Psychrobacillus	0.00374	0.00208	0.00559	0.00278	0.08593	0.66979	0.1797	-0.00375	0.00011	-0.00185	-0.00185	0.00185	-0.578219	0.578219
g__Desulfotruncus	0.00412	0.00391	0.00227	0.00147	0.136	1.81785	0.2363	0.00034	0.00368	0.00185	0.00185	0.00185	0.862233	0.862233
g__Winogradskya	0.0006	0.00255	0.00245	0.00457	0.0686	0.24544	0.1496	-0.00521	0.00064	-0.00185	-0.00185	0.00185	-2.02656	2.02656
g__Actinomadura	0.0057	0.01353	0.00386	0.00422	0.8949	1.47816	0.9258	-0.00319	0.00831	0.00184	0.00184	0.00184	0.563802	0.563802
g__Shumkonia	0.0038	0.00434	0.00196	0.00226	0.2061	1.93939	0.329	-0.00037	0.00414	0.00184	0.00184	0.00184	0.955603	0.955603
g__Seahorsevirus	0.00184	0.00851	0	0	0.09404	0	0.1907	3e-05	0.00529	0.00184	0.00184	0.00184	#NUM!	#NUM!
g__Phaeospirillum	0.0019	0.00248	6e-05	0.00016	0.00022	29.6756	0.0031	0.00096	0.00288	0.00183	0.00184	0.00184	4.89121	4.89121
g__Brumimicrobium	0.00222	0.00261	0.00038	0.00047	0.00237	5.76331	0.01325	0.00093	0.00296	0.00183	0.00184	0.00184	2.5269	2.5269
g__Plebeiobacterium	0.00201	0.00168	0.00017	0.00024	8e-05	11.9085	0.00168	0.00118	0.00254	0.00185	0.00184	0.00184	3.57392	3.57392
g__Psychrobacter	0.00309	0.00325	0.00125	0.00083	0.02725	2.46978	0.07381	0.00067	0.00335	0.00184	0.00184	0.00184	1.30438	1.30438
g__Denitrobaculum	0.00185	0.00204	2e-05	5e-05	2e-05	92.2086	0.00136	0.00114	0.00265	0.00183	0.00183	0.00183	6.52683	6.52683
g__Rozella	0.00213	0.00853	0.0003	0.00036	0.01393	7.15936	0.04736	-0.00036	0.00546	0.00183	0.00183	0.00183	2.83983	2.83983
g__unclassified_f__Methanocalculaceae	3e-05	4e-05	0.00186	0.00165	4.643e-06	0.01383	0.00077	-0.00286	-0.00085	-0.00184	-0.00183	0.00183	-6.17606	6.17606
g__Caldifermentibacillus	0.00066	0.00082	0.00248	0.00277	0.03296	0.26455	0.08592	-0.00367	-0.00029	-0.00182	-0.00182	0.00182	-1.91839	1.91839
g__Henriciella	0.00184	0.00214	2e-05	3e-05	2e-05	77.0235	0.00119	0.00108	0.0027	0.00181	0.00182	0.00182	6.26723	6.26723
g__Magnetospira	0.00184	0.00268	2e-05	3e-05	3e-05	114.225	0.00144	0.00093	0.003	0.00182	0.00182	0.00182	6.83573	6.83573
g__Succinivibrio	0.00536	0.00388	0.00355	0.00397	0.09305	1.5111	0.1905	-0.00127	0.00431	0.00181	0.00181	0.00181	0.595599	0.595599
g__Ruminobacter	0.00033	0.00061	0.00214	0.00248	0.00232	0.15342	0.01325	-0.00353	-0.00038	-0.00181	-0.00181	0.00181	-2.70444	2.70444
g__Desulfurispirillum	0.00224	0.00224	0.00043	0.00113	0.0016	5.17788	0.01017	0.00071	0.00299	0.00181	0.00181	0.00181	2.37236	2.37236
g__Fundicoccus	0.00497	0.00399	0.00316	0.00339	0.1173	1.57264	0.2127	-0.00091	0.00423	0.00181	0.00181	0.00181	0.653188	0.653188
g__Pneumocystis	0.00186	0.00766	6e-05	0.00012	0.4885	30.2986	0.6132	-8e-05	0.00585	0.0018	0.0018	0.0018	4.92118	4.92118
g__Rhodophyticola	0.00184	0.00232	4e-05	8e-05	8e-05	44.452	0.00173	0.00098	0.00287	0.0018	0.0018	0.0018	5.47418	5.47418
g__Rhodovarius	0.00197	0.00306	0.00017	0.00038	0.0012	11.8294	0.00855	0.00075	0.003	0.0018	0.0018	0.0018	3.5643	3.5643
g__Thermoleophilum	0.00765	0.02569	0.00585	0.01105	0.7771	1.30832	0.8343	-0.00847	0.01412	0.0018	0.0018	0.0018	0.387715	0.387715
g__Phyllobacterium	0.00303	0.00286	0.00124	0.00127	0.1006	2.45118	0.1908	0.00045	0.00321	0.0018	0.00179	0.00179	1.29348	1.29348
g__Rhodoligotrophos	0.00185	0.00234	6e-05	9e-05	0.00011	31.8569	0.00205	0.00099	0.00275	0.00179	0.00179	0.00179	4.99353	4.99353
g__Hydrogenispora	0.00429	0.00294	0.00608	0.00291	0.1087	0.70526	0.2	-0.00394	0.0003	-0.00179	-0.00179	0.00179	-0.503773	0.503773
g__Neopoerus	0.001	0.0009	0.00279	0.00191	0.00305	0.35959	0.01511	-0.00307	-0.0006	-0.00179	-0.00179	0.00179	-1.47558	1.47558
g__Asticcacaulis	0.00294	0.00394	0.00116	0.00138	0.2655	2.52868	0.3985	0.00011	0.00372	0.00178	0.00178	0.00178	1.33838	1.33838
g__Bremerella	0.00198	0.00273	0.0002	0.00039	0.00071	9.82812	0.00596	0.00083	0.00297	0.00178	0.00178	0.00178	3.29692	3.29692
g__Aminobacter	0.00228	0.00453	0.0005	0.0005	0.01085	4.53709	0.03929	0.00049	0.0038	0.00178	0.00178	0.00178	2.18177	2.18177
g__Silvimonas	0.00181	0.00188	3e-05	8e-05	0.0001	51.8775	0.00189	0.00116	0.00248	0.00178	0.00178	0.00178	5.69704	5.69704
g__Kingella	0.00197	0.00202	0.0002	0.00022	0.0002	9.83545	0.00292	0.00109	0.00261	0.00177	0.00177	0.00177	3.29799	3.29799
g__Atlantibacter	0.00015	0.00027	0.00191	0.00365	0.00083	0.07802	0.00655	-0.0043	-0.00027	-0.00176	-0.00176	0.00176	-3.68001	3.68001
g__Pallidibacillus	0.00188	0.00239	0.00012	0.00014	0.00054	15.5294	0.00496	0.00095	0.00282	0.00176	0.00176	0.00176	3.95693	3.95693
g__Desulfatibacillum	0.00374	0.0032	0.00549	0.00939	0.5585	0.68136	0.6824	-0.00837	0.00275	-0.00175	-0.00175	0.00175	-0.553511	0.553511
g__Halalkalibacter	0.00276	0.00234	0.00451	0.003	0.09305	0.6121	0.1905	-0.00384	0.00019	-0.00175	-0.00175	0.00175	-0.708161	0.708161
g__Paradesulfitobacterium	0.00255	0.00249	0.0008	0.00064	0.01208	3.19487	0.0421	0.00077	0.00287	0.00175	0.00175	0.00175	1.67576	1.67576
g__Epibacterium	0.00198	0.00909	0.00023	0.00056	0.2767	8.67148	0.4132	-0.00032	0.00553	0.00176	0.00175	0.00175	3.11628	3.11628
g__Marinimicrococcus	0.00179	0.00259	4e-05	8e-05	0.00061	46.5988	0.00533	0.00084	0.00284	0.00175	0.00175	0.00175	5.54222	5.54222
g__Fluviicoccus	0.00243	0.003	0.00068	0.00063	0.07925	3.58506	0.1677	0.00058	0.00304	0.00175	0.00175	0.00175	1.842	1.842
g__Anaerolactibacter	0.00224	0.00313	0.00049	0.00039	0.1742	4.60107	0.2863	0.00069	0.00306	0.00175	0.00175	0.00175	2.20197	2.20197
g__Candidatus_Neoehrlichia	0.00189	0.00305	0.00015	0.00041	0.05908	12.5927	0.1345	0.00072	0.00298	0.00174	0.00174	0.00174	3.65452	3.65452
g__Methylovulum	0.00245	0.0022	0.00071	0.0006	0.00389	3.45169	0.01761	0.00087	0.00265	0.00174	0.00174	0.00174	1.7873	1.7873
g__Denitratisoma	0.00123	0.0016	0.00296	0.00249	0.02468	0.41523	0.0684	-0.00351	-0.00011	-0.00173	-0.00173	0.00173	-1.26802	1.26802
g__Snodgrassella	0.00176	0.00171	0.00349	0.00181	0.02724	0.50382	0.07381	-0.00305	-0.00049	-0.00173	-0.00173	0.00173	-0.98902	0.98902
g__Batrachochytrium	7e-05	0.00021	0.0018	0.003	0.00014	0.03811	0.00234	-0.00397	-0.0004	-0.00173	-0.00173	0.00173	-4.71369	4.71369
g__Parageobacillus	0.00341	0.00276	0.00168	0.00097	0.03969	2.03209	0.099	0.00061	0.00301	0.00173	0.00173	0.00173	1.02296	1.02296
g__Limimonas	0.00173	0.00274	3.96154e-06	1e-05	0.00032	437.424	0.0037	0.00079	0.00286	0.00173	0.00172604	0.00172604	8.77289	8.77289
g__Mycolicibacter	0.00202	0.00242	0.0003	0.00039	0.00388	6.76284	0.01761	0.0009	0.00279	0.00172	0.00172	0.00172	2.75763	2.75763
g__Metasolibacillus	0.00237	0.00273	0.00065	0.00046	0.00389	3.63486	0.01761	0.00082	0.00294	0.00172	0.00172	0.00172	1.8619	1.8619
g__Candidatus_Sulfidibacterium	0.00189	0.0021	0.00017	0.00028	0.00036	11.31	0.00401	0.00096	0.00261	0.00172	0.00172	0.00172	3.49952	3.49952
g__Candidatus_Limisoma	0.00195	0.00188	0.00023	0.00029	0.00162	8.57551	0.01018	0.00102	0.00254	0.00172	0.00172	0.00172	3.10022	3.10022
g__Candidatus_Fermentithermobacillus	0.00188	0.00306	0.00016	0.00015	0.00116	11.8398	0.00836	0.0007	0.00306	0.00172	0.00172	0.00172	3.56557	3.56557
g__Methanohalophilus	0.00011	0.00016	0.00183	0.00285	0.00039	0.05869	0.00421	-0.00373	-0.00031	-0.00172	-0.00172	0.00172	-4.09074	4.09074
g__Shigella	0.00266	0.00833	0.00095	0.00161	0.5963	2.79421	0.6902	-0.00091	0.00557	0.00171	0.00171	0.00171	1.48244	1.48244
g__Tepidimonas	0.00252	0.00238	0.00423	0.0037	0.2655	0.59693	0.3985	-0.00415	0.00085	-0.0017	-0.00171	0.00171	-0.744366	0.744366
g__Reichenbachiella	0.00184	0.00177	0.00013	0.00014	0.00055	14.2016	0.00496	0.00107	0.00241	0.00171	0.00171	0.00171	3.82798	3.82798
g__Aquicella	0.00012	0.00048	0.00183	0.00546	0.7583	0.06391	0.8205	-0.00546	0.00027	-0.00172	-0.00171	0.00171	-3.96781	3.96781
g__Porodaedalea	0	0	0.00171	0.00318	1e-05	0	0.00092	-0.00411	-0.00014	-0.00171	-0.00171	0.00171	#NUM!	#NUM!
g__Pleomorphomonas	0.0029	0.00318	0.00119	0.00107	0.1462	2.43731	0.2507	0.00049	0.00313	0.00171	0.00171	0.00171	1.28529	1.28529
g__Saccharicrinis	0.00224	0.0024	0.00053	0.00072	0.00871	4.21481	0.03279	0.00075	0.00273	0.00171	0.00171	0.00171	2.07547	2.07547
g__Oleidesulfovibrio	0.02281	0.01901	0.02111	0.01572	1	1.08059	1	-0.01197	0.01279	0.0017	0.0017	0.0017	0.111819	0.111819
g__Sulfuritalea	0.00447	0.00378	0.00277	0.00159	0.2821	1.6107	0.4177	-1e-05	0.00348	0.0017	0.0017	0.0017	0.687688	0.687688
g__Phytobacter	0.00025	0.00095	0.00195	0.00559	0.953	0.12804	0.9735	-0.00559	0.00051	-0.0017	-0.0017	0.0017	-2.96533	2.96533
g__Komagataeibacter	0.00175	0.00225	6e-05	6e-05	0.00209	30.0627	0.01215	0.00092	0.00261	0.0017	0.00169	0.00169	4.9099	4.9099
g__Hannaella	0	0	0.00169	0.00333	1.017e-06	0	0.00027	-0.00421	-0.00011	-0.00169	-0.00169	0.00169	#NUM!	#NUM!
g__Caldimonas	0.0021	0.00158	0.00041	0.0005	0.00048	5.07821	0.00451	0.00107	0.00234	0.00169	0.00169	0.00169	2.34432	2.34432
g__Bullifex	0.00238	0.00186	0.0007	0.00046	0.00438	3.42099	0.01926	0.00095	0.00244	0.00169	0.00168	0.00168	1.77441	1.77441
g__Taibaiella	0.00229	0.00582	0.00061	0.00059	0.2061	3.76958	0.329	0.00011	0.00442	0.00169	0.00168	0.00168	1.9144	1.9144
g__Propionigenium	0.00244	0.00378	0.00076	0.00085	0.03969	3.21891	0.099	0.00026	0.00339	0.00168	0.00168	0.00168	1.68657	1.68657
g__Roseomonas	0.0049	0.00509	0.00323	0.00364	0.3958	1.51945	0.5391	-0.00158	0.00468	0.00168	0.00167	0.00167	0.603549	0.603549
g__Mariniradius	0.00183	0.00186	0.00016	0.00029	0.00288	11.125	0.01462	0.00093	0.00239	0.00166	0.00167	0.00167	3.47574	3.47574
g__Haloactinomyces	7e-05	0.00032	0.00174	0.00374	2e-05	0.03936	0.00126	-0.00422	-0.00021	-0.00167	-0.00167	0.00167	-4.66713	4.66713
g__Candidatus_Caballimonas	0.00169	0.00195	2e-05	5e-05	7e-05	94.2745	0.00163	0.00101	0.00243	0.00167	0.00167	0.00167	6.5588	6.5588
g__Frankia	0.00338	0.00508	0.00172	0.00209	0.1929	1.96182	0.3114	-0.00042	0.0042	0.00166	0.00166	0.00166	0.972193	0.972193
g__Desulforhopalus	0.00332	0.00263	0.00166	0.00118	0.09305	1.99904	0.1905	0.00042	0.00295	0.00166	0.00166	0.00166	0.999307	0.999307
g__Candidatus_Aphodosoma	0.00168	0.00189	2e-05	7e-05	4e-05	74.9198	0.00149	0.00098	0.00244	0.00165	0.00166	0.00166	6.22728	6.22728
g__unclassified_c__Candidatus_Binatia	0.00876	0.00863	0.00711	0.0108	0.1462	1.23214	0.2507	-0.0072	0.00813	0.00165	0.00165	0.00165	0.301166	0.301166
g__Desulfatiglans	0.00299	0.00248	0.00134	0.0012	0.03969	2.2298	0.099	0.00045	0.00291	0.00165	0.00165	0.00165	1.15691	1.15691
g__Nitrososphaera	0.00078	0.00108	0.00243	0.00274	0.02241	0.3226	0.0641	-0.00344	-3.147e-06	-0.00165	-0.00165	0.00165	-1.63218	1.63218
g__Candidatus_Enterocola	0.00236	0.00219	0.00071	0.00121	0.00696	3.32105	0.0278	0.0005	0.00281	0.00165	0.00165	0.00165	1.73164	1.73164
g__Cafeteria	0.00172	0.00862	7e-05	0.00012	0.1003	25.3378	0.1908	-0.00011	0.00508	0.00166	0.00165	0.00165	4.66322	4.66322
g__Aristaeella	0.00663	0.0057	0.00498	0.002	0.8062	1.33097	0.8549	-0.00049	0.00428	0.00165	0.00165	0.00165	0.412478	0.412478
g__Hymenobacter	0.0041	0.00278	0.00246	0.002	0.1006	1.6684	0.1908	2e-05	0.00319	0.00164	0.00164	0.00164	0.738465	0.738465
g__Candidatus_Frackibacter	0.00186	0.00234	0.00022	0.00026	0.00196	8.31176	0.01188	0.00081	0.00259	0.00163	0.00164	0.00164	3.05515	3.05515
g__Metamycoplasma	0.0018	0.00206	0.00016	0.00023	0.00031	11.4468	0.00368	0.00082	0.00252	0.00165	0.00164	0.00164	3.51687	3.51687
g__Krasilnikovia	0.0006	0.00256	0.00224	0.00483	0.00548	0.26641	0.02294	-0.00519	0.00086	-0.00165	-0.00164	0.00164	-1.90828	1.90828
g__Parendozoicomonas	0.00172	0.00209	8e-05	8e-05	0.00011	20.2552	0.00205	0.00094	0.00246	0.00164	0.00164	0.00164	4.34022	4.34022
g__Hwanghaeella	0.00164	0.00166	4.88439e-06	1e-05	1e-05	336.017	0.00104	0.00106	0.00235	0.00164	0.00163512	0.00163512	8.39239	8.39239
g__Amygdalobacter	0.0022	0.00234	0.00057	0.00054	0.01927	3.82946	0.05762	0.00075	0.00263	0.00163	0.00163	0.00163	1.93714	1.93714
g__Liberibacter	0.00175	0.00241	0.00012	0.00029	0.00218	14.0674	0.01255	0.00076	0.00263	0.00163	0.00163	0.00163	3.81429	3.81429
g__Marinilabilia	0.00187	0.00169	0.00024	0.00033	0.00055	7.83302	0.00496	0.001	0.00232	0.00163	0.00163	0.00163	2.96957	2.96957
g__Capillimicrobium	0.00976	0.03526	0.00813	0.0158	0.9849	1.20079	0.9931	-0.01388	0.02048	0.00163	0.00163	0.00163	0.263984	0.263984
g__Atribacter	0.00252	0.0035	0.0009	0.00051	0.5842	2.80281	0.6902	0.00042	0.0031	0.00162	0.00162	0.00162	1.48687	1.48687
g__Hansschlegelia	0.00167	0.00227	5e-05	0.0001	0.00039	30.8479	0.00421	0.00082	0.00253	0.00161	0.00162	0.00162	4.9471	4.9471
g__Alcanivorax	0.00191	0.00152	0.00029	0.00024	0.00039	6.5754	0.00421	0.00104	0.00225	0.00162	0.00162	0.00162	2.71708	2.71708
g__Syncephalis	0.00172	0.00861	0.0001	0.00014	0.03682	17.0199	0.09322	-0.00015	0.00506	0.00162	0.00162	0.00162	4.08915	4.08915
g__Chelonobacter	8e-05	0.0001	0.00169	0.00169	0.00022	0.04712	0.0031	-0.00271	-0.00064	-0.00161	-0.00161	0.00161	-4.40752	4.40752
g__Aeriscardovia	0.00342	0.00577	0.00181	0.00155	0.9849	1.88689	0.9931	-0.0005	0.00414	0.00161	0.00161	0.00161	0.91601	0.91601
g__unclassified_p__Candidatus_Uhrbacteria	0.00247	0.00485	0.00086	0.00108	0.3751	2.87088	0.5166	2e-05	0.00395	0.00161	0.00161	0.00161	1.52149	1.52149
g__Empedobacter	0.00232	0.00197	0.00071	0.00125	0.00554	3.27509	0.02294	0.00046	0.00273	0.00161	0.00161	0.00161	1.71153	1.71153
g__Sphingosinicella	0.00232	0.00245	0.00071	0.00132	0.01273	3.25669	0.04406	0.00036	0.00286	0.0016	0.00161	0.00161	1.70341	1.70341
g__Aliihoeflea	0.00164	0.00171	3e-05	4e-05	2e-05	50.6219	0.00117	0.00102	0.00231	0.0016	0.00161	0.00161	5.66169	5.66169
g__Tetragenococcus	0.00489	0.00386	0.00329	0.00182	0.3751	1.48677	0.5166	-0.00011	0.0034	0.0016	0.0016	0.0016	0.572181	0.572181
g__Xanthobacter	0.00193	0.00203	0.00033	0.00059	0.00197	5.84694	0.0119	0.00082	0.00247	0.0016	0.0016	0.0016	2.54768	2.54768
g__Pseudoroseomonas	0.00176	0.00217	0.00016	0.00024	0.0041	10.9734	0.01853	0.00086	0.00248	0.0016	0.0016	0.0016	3.45594	3.45594
g__Neofamilia	0.00032	0.00053	0.00192	0.00267	0.0049	0.16461	0.02124	-0.0035	-0.0004	-0.00161	-0.0016	0.0016	-2.60288	2.60288
g__Buchnera	0.0016	0.00251	1e-05	3e-05	0.00069	122.112	0.00587	0.00077	0.00265	0.00159	0.00159	0.00159	6.93207	6.93207
g__Bipolaris	1e-05	3e-05	0.0016	0.00386	0.00033	0.0059	0.00382	-0.00428	-0.00015	-0.00159	-0.00159	0.00159	-7.40507	7.40507
g__Citroniella	5e-05	7e-05	0.00164	0.00406	0.8118	0.02815	0.8604	-0.00445	-5e-05	-0.00159	-0.00159	0.00159	-5.15072	5.15072
g__Chondromyces	0.00164	0.00216	5e-05	8e-05	0.00141	31.4476	0.00934	0.00082	0.0025	0.00158	0.00159	0.00159	4.97488	4.97488
g__Finegoldia	0.00272	0.00144	0.00431	0.00267	0.136	0.63182	0.2363	-0.00338	4e-05	-0.00159	-0.00159	0.00159	-0.662414	0.662414
g__Azonexus	0.00385	0.00426	0.00227	0.00172	0.8062	1.69686	0.8549	-0.00023	0.00361	0.00158	0.00158	0.00158	0.762868	0.762868
g__Candidatus_Dichloromethanomonas	0.00113	0.00095	0.00271	0.0023	0.03297	0.41632	0.08592	-0.00307	-0.00017	-0.00158	-0.00158	0.00158	-1.26424	1.26424
g__Arenibacter	0.00191	0.00188	0.00033	0.00036	0.00184	5.74542	0.01129	0.00091	0.00237	0.00158	0.00158	0.00158	2.52241	2.52241
g__Oryzibacter	0.00022	0.00091	0.0018	0.0013	0.00012	0.12242	0.00214	-0.00251	-0.00069	-0.00158	-0.00158	0.00158	-3.03009	3.03009
g__Lacinutrix	0.00174	0.00206	0.00016	0.00024	0.00091	11.184	0.00708	0.00088	0.00241	0.00158	0.00158	0.00158	3.48336	3.48336
g__Dentiscutata	6e-05	0.00018	0.00164	0.00237	2.551e-06	0.03491	0.00049	-0.0032	-0.00045	-0.00159	-0.00158	0.00158	-4.84022	4.84022
g__Chaetomidium	0.00158	0.00806	0	0	0.601	0	0.6902	0	0.00474	0.00158	0.00158	0.00158	#NUM!	#NUM!
g__Hallella	0.00206	0.00275	0.00049	0.00032	0.07301	4.17663	0.1575	0.00056	0.00263	0.00157	0.00157	0.00157	2.06234	2.06234
g__Candidatus_Methanofilum	0.00079	0.00084	0.00236	0.00207	0.00084	0.33557	0.00655	-0.00318	-0.00058	-0.00157	-0.00157	0.00157	-1.57531	1.57531
g__Phosphitispora	0.00294	0.00412	0.00137	0.00106	0.3751	2.14174	0.5166	0.0001	0.00338	0.00157	0.00157	0.00157	1.09878	1.09878
g__Novispirillum	0.0019	0.00219	0.00033	0.00094	0.00026	5.67172	0.00328	0.00056	0.00258	0.00156	0.00157	0.00157	2.50379	2.50379
g__Thermoflavimicrobium	0.00014	0.00039	0.00171	0.00301	0.00073	0.07937	0.00602	-0.00366	-0.00021	-0.00158	-0.00157	0.00157	-3.65526	3.65526
g__Psychroserpens	0.0007	0.00078	0.00227	0.0042	0.2572	0.30937	0.3895	-0.00449	0.00061	-0.00157	-0.00157	0.00157	-1.69259	1.69259
g__Solibacillus	0.00242	0.00436	0.00085	0.00142	0.1311	2.86404	0.2303	-8e-05	0.00372	0.00158	0.00157	0.00157	1.51805	1.51805
g__Ignisphaera	0.00206	0.00734	0.0005	0.00149	0.00169	4.08769	0.01055	-0.00067	0.00494	0.00156	0.00156	0.00156	2.03129	2.03129
g__Alloprevotella	0.00298	0.00254	0.00142	0.00149	0.05665	2.10648	0.13	0.00024	0.00284	0.00157	0.00156	0.00156	1.07483	1.07483
g__Paralia	0.00156	0.00586	1.65686e-06	4.97059e-06	0.03138	942.891	0.08299	0.00013	0.00409	0.00156	0.00155834	0.00155834	9.88095	9.88095
g__Peronospora	6e-05	0.00016	0.00161	0.00224	3e-05	0.03474	0.00136	-0.00328	-0.0004	-0.00155	-0.00155	0.00155	-4.84726	4.84726
g__Pleonosporium	0.00155	0.00791	0	0	0.601	0	0.6902	0	0.00465	0.00155	0.00155	0.00155	#NUM!	#NUM!
g__Aestuariivirga	0.00167	0.00182	0.00321	0.00718	0.2061	0.51933	0.329	-0.00661	0.00152	-0.00154	-0.00154	0.00154	-0.945277	0.945277
g__Plasmodium	0.00162	0.00617	8e-05	0.00011	0.0929	19.3713	0.1905	-9e-05	0.00431	0.00154	0.00154	0.00154	4.27585	4.27585
g__Paraflavitalea	0.00164	0.00434	0.0001	0.00027	0.00041	15.5801	0.00421	0.00045	0.0036	0.00153	0.00154	0.00154	3.96163	3.96163
g__Krasilnikoviella	0.00194	0.00726	0.00041	0.00058	0.05458	4.69813	0.1268	-0.00047	0.00495	0.00153	0.00153	0.00153	2.23209	2.23209
g__Nitellopsis	4e-05	7e-05	0.00157	0.00451	0.9217	0.02823	0.9497	-0.00455	3e-05	-0.00153	-0.00153	0.00153	-5.14663	5.14663
g__Planomonospora	0.00055	0.00239	0.00208	0.00293	0.00234	0.26489	0.01325	-0.00365	0.00035	-0.00153	-0.00153	0.00153	-1.91653	1.91653
g__Anaeromyxobacter	0.0036	0.00282	0.00208	0.00133	0.157	1.73218	0.2656	0.00033	0.00294	0.00152	0.00152	0.00152	0.792589	0.792589
g__unclassified_c__Candidatus_Lokiarchaeia	0.00152	0.00206	0	0	7e-05	0	0.00163	0.00088	0.00239	0.00152	0.00152	0.00152	#NUM!	#NUM!
g__Afipia	0.00257	0.0062	0.00105	0.00174	0.1462	2.45766	0.2507	-0.0005	0.00449	0.00152	0.00152	0.00152	1.29729	1.29729
g__Candidatus_Colousia	0.00163	0.00211	0.00011	0.00014	0.0034	15.1584	0.01618	0.00074	0.00241	0.00152	0.00152	0.00152	3.92204	3.92204
g__Laedolimicola	0.00291	0.00428	0.00442	0.00332	0.07301	0.65804	0.1575	-0.00409	0.00133	-0.00151	-0.00151	0.00151	-0.603753	0.603753
g__Tahibacter	0.00068	0.0007	0.00219	0.00176	0.0021	0.31007	0.01215	-0.00271	-0.0006	-0.00151	-0.00151	0.00151	-1.68933	1.68933
g__Theiavirus	0.00151	0.0077	0	0	0.3123	0	0.4479	0	0.00453	0.00151	0.00151	0.00151	#NUM!	#NUM!
g__Igneacidithiobacillus	0.00158	0.004	7e-05	0.00021	0.00048	23.1005	0.00451	0.00041	0.0032	0.00151	0.00151	0.00151	4.52985	4.52985
g__Allosphingosinicella	0.00124	0.00248	0.00275	0.00453	0.3551	0.45	0.4952	-0.0048	0.00084	-0.00151	-0.00151	0.00151	-1.152	1.152
g__Siccirubricoccus	0.00187	0.00195	0.00036	0.00027	0.02472	5.12649	0.0684	0.00077	0.00232	0.00151	0.00151	0.00151	2.35797	2.35797
g__Methylomonas	0.00435	0.00341	0.00284	0.00368	0.08593	1.53246	0.1797	-0.00135	0.00382	0.00151	0.00151	0.00151	0.615849	0.615849
g__Criibacterium	0.0033	0.00187	0.0018	0.00125	0.04346	1.83492	0.1068	0.00042	0.00258	0.0015	0.0015	0.0015	0.875717	0.875717
g__Emticicia	0.00263	0.00262	0.00113	0.00214	0.01832	2.33139	0.05526	-0.0004	0.00305	0.0015	0.0015	0.0015	1.22119	1.22119
g__Nitrospirillum	0.00178	0.00224	0.00028	0.00025	0.05665	6.28153	0.13	0.00072	0.00245	0.0015	0.0015	0.0015	2.65112	2.65112
g__Halopseudomonas	0.00165	0.00163	0.00015	0.0002	0.00063	11.2893	0.00547	0.00089	0.00214	0.00151	0.0015	0.0015	3.49688	3.49688
g__Taishania	0.00152	0.00227	2e-05	4e-05	0.00029	77.5771	0.00349	0.0007	0.0024	0.0015	0.0015	0.0015	6.27756	6.27756
g__Fimicolochytrium	0.00154	0.00779	4e-05	7e-05	0.4952	42.5355	0.6202	-6e-05	0.00458	0.00151	0.0015	0.0015	5.41059	5.41059
g__Drosophila	0.00202	0.00668	0.00053	0.00105	0.6321	3.8211	0.7195	-0.00065	0.00431	0.00149	0.00149	0.00149	1.93399	1.93399
g__Sedimentitalea	0.00154	0.00452	5e-05	8e-05	0.00031	28.7352	0.00368	0.00037	0.00351	0.00149	0.00149	0.00149	4.84475	4.84475
g__Acidisphaera	0.00163	0.00235	0.00014	0.00023	0.00621	11.2702	0.02533	0.00074	0.00256	0.00149	0.00149	0.00149	3.49445	3.49445
g__Rectinema	0.0026	0.0033	0.00111	0.00115	0.1006	2.33518	0.1908	1e-05	0.00302	0.00149	0.00149	0.00149	1.22353	1.22353
g__Rudanella	0.00153	0.00357	4e-05	0.00013	0.00285	35.9303	0.0145	0.00039	0.00319	0.00148	0.00149	0.00149	5.16713	5.16713
g__Candidatus_Fibrimonas	0.00146	0.0011	0.00294	0.00198	0.05665	0.498	0.13	-0.00286	-0.00028	-0.00147	-0.00148	0.00148	-1.00578	1.00578
g__Fusarium	0.00027	0.00072	0.00175	0.00209	0.00207	0.15618	0.01215	-0.00283	-0.00026	-0.00148	-0.00148	0.00148	-2.67872	2.67872
g__Glycomyces	0.00029	0.0006	0.00177	0.00329	0.07917	0.16453	0.1677	-0.00389	-5e-05	-0.00148	-0.00148	0.00148	-2.60358	2.60358
g__Skermanella	0.00302	0.00346	0.00155	0.00228	0.1929	1.9474	0.3114	-0.0006	0.00349	0.00147	0.00147	0.00147	0.961549	0.961549
g__Cohaesibacter	0.00382	0.00406	0.00235	0.00238	0.2655	1.6279	0.3985	-0.00066	0.00363	0.00147	0.00147	0.00147	0.703012	0.703012
g__Solitalea	0.00173	0.00167	0.00026	0.00032	0.00036	6.72377	0.00401	0.00087	0.00218	0.00147	0.00147	0.00147	2.74927	2.74927
g__Candidatus_Angelobacter	0.00566	0.00359	0.0042	0.00499	0.1173	1.34718	0.2127	-0.00206	0.00447	0.00146	0.00146	0.00146	0.429943	0.429943
g__Aquihabitans	0.00336	0.00744	0.0019	0.00294	0.4503	1.77341	0.5764	-0.00163	0.00548	0.00147	0.00146	0.00146	0.826526	0.826526
g__Candidatus_Limadaptatus	0.00238	0.00224	0.00092	0.00074	0.07925	2.58236	0.1677	0.00048	0.00248	0.00146	0.00146	0.00146	1.36869	1.36869
g__Pseudalkalibacillus	0.00164	0.00136	0.0031	0.00194	0.05193	0.53034	0.1211	-0.00289	-0.00016	-0.00146	-0.00146	0.00146	-0.915011	0.915011
g__Selenihalanaerobacter	0.0005	0.00063	0.00196	0.00211	0.1564	0.25722	0.2656	-0.00283	-0.00021	-0.00145	-0.00146	0.00146	-1.95893	1.95893
g__Seramator	0.00158	0.00147	0.00012	0.00021	0.00012	13.6229	0.00224	0.00094	0.00209	0.00146	0.00146	0.00146	3.76797	3.76797
g__Pseudobacteroides	0.01062	0.00518	0.00916	0.00488	0.3551	1.15993	0.4952	-0.00198	0.00487	0.00147	0.00146	0.00146	0.214038	0.214038
g__Turicimonas	0.00267	0.002	0.00122	0.00128	0.04346	2.18364	0.1068	0.00032	0.00256	0.00145	0.00145	0.00145	1.12674	1.12674
g__Defluviicoccus	0.00526	0.00478	0.00381	0.00793	0.04754	1.38136	0.1144	-0.00417	0.00553	0.00145	0.00145	0.00145	0.466089	0.466089
g__Candidatus_Crickella	0.00242	0.00378	0.00097	0.00089	0.3551	2.49103	0.4952	0.00012	0.00319	0.00145	0.00145	0.00145	1.31674	1.31674
g__Geotalea	0.00163	0.00145	0.00018	0.00028	0.00102	9.06013	0.00762	0.00088	0.00201	0.00145	0.00145	0.00145	3.17953	3.17953
g__Petrocella	0.00734	0.00485	0.0059	0.00396	0.5334	1.24419	0.6582	-0.00156	0.00451	0.00144	0.00144	0.00144	0.315207	0.315207
g__Aerococcus	0.00989	0.01353	0.00845	0.00542	0.5089	1.16943	0.6321	-0.00416	0.00795	0.00143	0.00144	0.00144	0.225806	0.225806
g__Susfortunavirus	0.00144	0.0026	0	0	0.00324	0	0.01553	0.00052	0.00253	0.00144	0.00144	0.00144	#NUM!	#NUM!
g__Chloracidobacterium	0.00043	0.00043	0.00187	0.00303	0.1682	0.23057	0.282	-0.00339	4e-05	-0.00144	-0.00144	0.00144	-2.11672	2.11672
g__Alkaliflexus	0.00155	0.00161	0.00011	0.00021	0.0002	13.4613	0.00292	0.00086	0.00209	0.00143	0.00144	0.00144	3.75074	3.75074
g__Flammeovirga	0.00315	0.00297	0.00172	0.00099	0.3551	1.83193	0.4952	0.00016	0.00281	0.00143	0.00143	0.00143	0.873364	0.873364
g__Commensalibacter	0.00462	0.00637	0.00319	0.00558	0.7484	1.44682	0.8117	-0.00312	0.00535	0.00143	0.00143	0.00143	0.532885	0.532885
g__Xylanibacillus	0.00198	0.0039	0.00055	0.00037	0.3172	3.59207	0.4515	0.00025	0.00311	0.00143	0.00143	0.00143	1.84482	1.84482
g__Ethanoligenens	0.00586	0.00422	0.00728	0.00313	0.1803	0.80452	0.2939	-0.00381	0.00126	-0.00142	-0.00142	0.00142	-0.3138	0.3138
g__Propionicimonas	0.00331	0.00344	0.00189	0.00225	0.1683	1.74968	0.282	-0.00064	0.00321	0.00142	0.00142	0.00142	0.807091	0.807091
g__Candidatus_Cardinium	0.00168	0.00274	0.00026	0.00047	0.02862	6.39263	0.07705	0.00042	0.00261	0.00142	0.00142	0.00142	2.67641	2.67641
g__Desulfatirhabdium	0.00148	0.00169	6e-05	0.00013	9e-05	25.8229	0.00181	0.00081	0.0021	0.00143	0.00142	0.00142	4.69058	4.69058
g__Arachidicoccus	0.00157	0.00529	0.00015	0.00021	0.01196	10.6786	0.0421	0.00018	0.00368	0.00142	0.00142	0.00142	3.41665	3.41665
g__Gelidibacter	0.0018	0.00184	0.00038	0.00022	0.02241	4.77194	0.0641	0.00075	0.00218	0.00142	0.00142	0.00142	2.25458	2.25458
g__Saprochaete	0.00145	0.00721	3e-05	8e-05	0.6252	51.7686	0.7122	-4e-05	0.00427	0.00143	0.00142	0.00142	5.69401	5.69401
g__Candidatus_Caccosoma	0.00612	0.00581	0.0047	0.00731	0.1173	1.30178	0.2127	-0.00403	0.0056	0.00142	0.00142	0.00142	0.380486	0.380486
g__Candidatus_Brocadia	0.0008	0.00085	0.00221	0.00183	0.00554	0.36095	0.02294	-0.00267	-0.0004	-0.00142	-0.00141	0.00141	-1.47013	1.47013
g__Sporotomaculum	0.00108	0.00091	0.00249	0.00215	0.01833	0.43536	0.05526	-0.00294	-0.00026	-0.0014	-0.00141	0.00141	-1.19972	1.19972
g__Humibacillus	0.00122	0.00243	0.00263	0.0035	0.1742	0.46586	0.2863	-0.00373	0.00071	-0.0014	-0.00141	0.00141	-1.10203	1.10203
g__Dolichospermum	0.00127	0.00115	0.00268	0.00708	0.03297	0.47523	0.08592	-0.00632	0.00133	-0.0014	-0.00141	0.00141	-1.0733	1.0733
g__Leyella	0.00167	0.00145	0.00026	0.00032	0.00048	6.3593	0.00451	0.00084	0.00203	0.00141	0.00141	0.00141	2.66887	2.66887
g__Fluoribacter	0.00142	0.00182	1e-05	2e-05	5e-05	172.916	0.00163	0.00078	0.0022	0.00141	0.00141	0.00141	7.43393	7.43393
g__Parvularcula	0.00155	0.00194	0.00014	0.00022	0.00209	11.1991	0.01215	0.00077	0.00222	0.00142	0.00141	0.00141	3.48531	3.48531
g__Sheuella	0.00146	0.00236	5e-05	6e-05	0.04946	30.42	0.1173	0.00064	0.00239	0.00142	0.00141	0.00141	4.92695	4.92695
g__Dethiosulfatarculus	0.00472	0.00366	0.00613	0.00389	0.2993	0.76936	0.4387	-0.00417	0.00145	-0.00142	-0.00141	0.00141	-0.378269	0.378269
g__Vulcanibacillus	0.00228	0.00299	0.00087	0.00095	0.07301	2.62869	0.1575	0.00031	0.00291	0.00141	0.00141	0.00141	1.39434	1.39434
g__Adlercreutzia	0.01587	0.01184	0.01446	0.01055	0.8949	1.09747	0.9258	-0.00683	0.00927	0.00141	0.00141	0.00141	0.134182	0.134182
g__Candidatus_Scatosoma	0.00216	0.00236	0.00076	0.00054	0.05665	2.85882	0.13	0.00057	0.00249	0.00141	0.0014	0.0014	1.51542	1.51542
g__Trichormus	0.00013	0.00029	0.00153	0.00431	0.5922	0.08181	0.6902	-0.00436	0.00014	-0.00141	-0.0014	0.0014	-3.61158	3.61158
g__Cyberlindnera	0.00148	0.00753	8e-05	0.00014	0.06735	17.912	0.1493	-0.00014	0.00439	0.0014	0.0014	0.0014	4.16286	4.16286
g__Alkalibacterium	0.00316	0.00297	0.00456	0.00597	0.7199	0.69376	0.7948	-0.00595	0.00193	-0.0014	-0.0014	0.0014	-0.527491	0.527491
g__Kaistella	0.00186	0.00199	0.00047	0.0005	0.01084	3.95362	0.03929	0.00061	0.00228	0.00139	0.00139	0.00139	1.98317	1.98317
g__Candidatus_Scatousia	0.00068	0.00066	0.00207	0.00108	0.00055	0.33035	0.00496	-0.0021	-0.00068	-0.00139	-0.00139	0.00139	-1.59793	1.59793
g__Candidatus_Aphodoplasma	0.00723	0.00448	0.00585	0.00408	0.3751	1.23522	0.5166	-0.0019	0.00444	0.00138	0.00138	0.00138	0.304768	0.304768
g__Enteroscipio	0.00479	0.00463	0.00617	0.00864	0.5334	0.7771	0.6582	-0.00769	0.00361	-0.00137	-0.00138	0.00138	-0.363828	0.363828
g__Calothrix	0.00056	0.0008	0.00194	0.00229	0.00621	0.29142	0.02533	-0.00293	-9e-05	-0.00137	-0.00138	0.00138	-1.77883	1.77883
g__Labilibacter	0.00143	0.00137	5e-05	0.0001	0.00021	27.745	0.00306	0.00094	0.0019	0.00138	0.00138	0.00138	4.79416	4.79416
g__Candidatus_Onthomorpha	0.00144	0.00175	6e-05	0.00014	0.00024	26.1159	0.00312	0.00079	0.00207	0.00138	0.00138	0.00138	4.70685	4.70685
g__Roseitalea	0.00141	0.00185	3e-05	4e-05	1e-05	50.9907	0.00112	0.00081	0.0022	0.00138	0.00138	0.00138	5.67216	5.67216
g__Paraliobacillus	0.0029	0.00305	0.00152	0.00112	0.3551	1.91523	0.4952	7e-05	0.00277	0.00139	0.00138	0.00138	0.937518	0.937518
g__Hujiaoplasma	0.00342	0.00228	0.00204	0.00218	0.1311	1.67863	0.2303	-0.00032	0.00279	0.00138	0.00138	0.00138	0.747284	0.747284
g__Chromobacterium	0.00616	0.00527	0.00478	0.00649	0.2821	1.28927	0.4177	-0.00338	0.00529	0.00138	0.00138	0.00138	0.366554	0.366554
g__Senegalimassilia	0.00286	0.00233	0.00423	0.00411	0.485	0.67601	0.609	-0.00403	0.00127	-0.00137	-0.00137	0.00137	-0.564884	0.564884
g__Anaerolinea	0.00265	0.00213	0.00402	0.00215	0.05665	0.65957	0.13	-0.00294	0.00024	-0.00137	-0.00137	0.00137	-0.600402	0.600402
g__Schinkia	0.00216	0.00331	0.00353	0.00316	0.02725	0.61123	0.07381	-0.00389	0.00078	-0.00137	-0.00137	0.00137	-0.710213	0.710213
g__unclassified_f__Candidatus_Cloacimonadaceae	0.00193	0.00146	0.00056	0.00067	0.00437	3.46412	0.01926	0.00068	0.00202	0.00137	0.00137	0.00137	1.79249	1.79249
g__Candidatus_Heritagella	0.00141	0.00145	0.00278	0.002	0.01085	0.50803	0.03929	-0.00271	-0.00013	-0.00137	-0.00137	0.00137	-0.977014	0.977014
g__Candidatus_Magnetaquicoccus	0.00149	0.00239	0.00012	0.00022	0.0684	12.2864	0.1496	0.00056	0.00244	0.00137	0.00137	0.00137	3.61898	3.61898
g__Candidatus_Avimonoglobus	0.00577	0.00416	0.00713	0.00238	0.07925	0.80927	0.1677	-0.00363	0.00084	-0.00136	-0.00136	0.00136	-0.305307	0.305307
g__Flavivirga	0.00168	0.00189	0.00032	0.00027	0.02028	5.17711	0.05938	0.00065	0.00211	0.00135	0.00136	0.00136	2.37215	2.37215
g__unclassified_o__Vampirovibrionales	0.00159	0.00272	0.00023	0.00054	0.01765	6.87972	0.05384	0.00044	0.00248	0.00136	0.00136	0.00136	2.78235	2.78235
g__Tolypothrix	0.00015	0.00022	0.00151	0.00348	0.8336	0.09853	0.879	-0.00391	0.00012	-0.00136	-0.00136	0.00136	-3.34329	3.34329
g__Chenggangzhangella	0.00137	0.00204	1e-05	2e-05	0.0001	125.905	0.00189	0.00073	0.00221	0.00136	0.00136	0.00136	6.9762	6.9762
g__Ornithinicoccus	0.00011	0.00024	0.00147	0.00315	0.00302	0.07287	0.01511	-0.00355	-0.00013	-0.00136	-0.00136	0.00136	-3.77853	3.77853
g__Algimonas	0.00137	0.00211	1e-05	3e-05	0.02911	92.9524	0.07822	0.00066	0.00224	0.00136	0.00136	0.00136	6.53842	6.53842
g__Thermus	0.00146	0.00194	0.0001	0.00012	0.00036	14.286	0.00401	0.00068	0.00225	0.00136	0.00136	0.00136	3.83653	3.83653
g__Acetomicrobium	0.00471	0.00549	0.00335	0.00281	0.8356	1.40565	0.879	-0.00131	0.00416	0.00136	0.00136	0.00136	0.491237	0.491237
g__Methylorubrum	0.00067	0.00067	0.00202	0.00227	0.02241	0.33381	0.0641	-0.00298	-0.00016	-0.00134	-0.00135	0.00135	-1.5829	1.5829
g__Tilletia	0.0015	0.00763	0.00015	0.00041	0.01958	9.80445	0.05841	-0.0004	0.00448	0.00135	0.00135	0.00135	3.29344	3.29344
g__Boseongicola	0.00153	0.00178	0.00018	0.0003	0.00096	8.31853	0.00718	0.00072	0.00211	0.00135	0.00135	0.00135	3.05633	3.05633
g__Litorimonas	0.00138	0.00229	3e-05	5e-05	0.0024	43.6449	0.01333	0.00061	0.0024	0.00134	0.00135	0.00135	5.44774	5.44774
g__Candidatus_Fimisoma	0.00373	0.00496	0.00507	0.00278	0.08593	0.73592	0.1797	-0.00376	0.00145	-0.00134	-0.00134	0.00134	-0.442379	0.442379
g__unclassified_p__Candidatus_Falkowbacteria	0.00342	0.00498	0.00208	0.00354	0.04346	1.64071	0.1068	-0.0015	0.00405	0.00134	0.00134	0.00134	0.71432	0.71432
g__unclassified_o__Candidatus_Obscuribacterales	0.00147	0.00207	0.00013	0.00014	0.02123	11.1525	0.0618	0.00066	0.00229	0.00134	0.00134	0.00134	3.4793	3.4793
g__Sporohalobacter	0.00139	0.00158	5e-05	6e-05	0.00036	29.2814	0.00401	0.00075	0.00198	0.00134	0.00134	0.00134	4.87191	4.87191
g__Lachancea	0.00134	0.00652	0	0	0.01159	0	0.04103	4e-05	0.00391	0.00134	0.00134	0.00134	#NUM!	#NUM!
g__Theileria	0.00135	0.00678	1e-05	3e-05	0.7331	138.387	0.802	-2e-05	0.00402	0.00134	0.00134	0.00134	7.11257	7.11257
g__Thamnocephalis	0.00138	0.00676	4e-05	7e-05	0.1437	32.3634	0.2487	-5e-05	0.00404	0.00133	0.00134	0.00134	5.01629	5.01629
g__Anthropogastromicrobium	0.0042	0.01047	0.00553	0.00526	0.02241	0.76002	0.0641	-0.00622	0.0036	-0.00133	-0.00133	0.00133	-0.395891	0.395891
g__Bdellovibrio	0.00196	0.00263	0.00063	0.00065	0.1462	3.12876	0.2507	0.00032	0.00248	0.00133	0.00133	0.00133	1.64559	1.64559
g__unclassified_f__Microviridae	0.00173	0.00662	0.0004	0.00112	0.01408	4.35927	0.04774	-0.00064	0.00434	0.00133	0.00133	0.00133	2.12409	2.12409
g__unclassified_f__Prochloraceae	0.00149	0.00158	0.00016	0.00033	0.00139	9.45378	0.00931	0.00073	0.00204	0.00133	0.00133	0.00133	3.24089	3.24089
g__Paraphoma	0	0	0.00133	0.00376	6e-05	0	0.00163	-0.00386	-3e-05	-0.00133	-0.00133	0.00133	#NUM!	#NUM!
g__Maritimibacter	0.00148	0.00301	0.00015	0.0003	0.00944	9.56463	0.03523	0.00035	0.00273	0.00132	0.00133	0.00133	3.25771	3.25771
g__Candidatus_Bodocaedibacter	0.00134	0.00213	1e-05	2e-05	0.00121	159.152	0.00855	0.00062	0.00222	0.00133	0.00133	0.00133	7.31426	7.31426
g__Ceratobasidium	0.00145	0.00719	0.00012	0.00022	0.03058	11.6175	0.08121	-0.00023	0.00421	0.00133	0.00133	0.00133	3.53823	3.53823
g__Smithella	0.00388	0.00249	0.00256	0.00138	0.2061	1.51855	0.329	0.00013	0.00266	0.00133	0.00132	0.00132	0.602694	0.602694
g__Uliginosibacterium	0.00186	0.00266	0.00054	0.00061	0.1569	3.43698	0.2656	0.00034	0.00253	0.00132	0.00132	0.00132	1.78114	1.78114
g__Sodaliphilus	0.00174	0.0018	0.00042	0.00032	0.01205	4.11952	0.0421	0.00067	0.00211	0.00132	0.00132	0.00132	2.04248	2.04248
g__Numidum	0.0001	0.00019	0.00142	0.00199	9e-05	0.06807	0.00187	-0.00263	-0.00038	-0.00132	-0.00132	0.00132	-3.87684	3.87684
g__Boudabousia	0.00134	0.00329	2e-05	6e-05	0.00156	55.6155	0.01003	0.00042	0.00275	0.00132	0.00132	0.00132	5.79742	5.79742
g__Blastocladiella	0.00136	0.00677	4e-05	0.0001	0.5768	33.1906	0.6902	-6e-05	0.00401	0.00132	0.00132	0.00132	5.0527	5.0527
g__Johnsonella	0.00433	0.00428	0.00564	0.00337	0.136	0.7679	0.2363	-0.00393	0.00145	-0.00131	-0.00131	0.00131	-0.38101	0.38101
g__Candidatus_Avacidaminococcus	0.00138	0.00192	0.00269	0.0032	0.2655	0.5149	0.3985	-0.00365	0.00063	-0.0013	-0.00131	0.00131	-0.957636	0.957636
g__Neoconidiobolus	5e-05	0.00014	0.00136	0.00278	0.00138	0.03532	0.00927	-0.00332	-0.0001	-0.00131	-0.00131	0.00131	-4.82337	4.82337
g__Microbaculum	0.00136	0.0018	5e-05	0.00011	0.00013	25.5722	0.00229	0.00075	0.00205	0.0013	0.00131	0.00131	4.67651	4.67651
g__Chryseolinea	0.00162	0.00169	0.00293	0.00834	0.01571	0.55302	0.05178	-0.00723	0.00203	-0.00131	-0.00131	0.00131	-0.854596	0.854596
g__Schizosaccharomyces	0.00146	0.00722	0.00015	0.00024	0.07696	9.81252	0.1655	-0.00024	0.00425	0.00131	0.00131	0.00131	3.29462	3.29462
g__Candidatus_Aegiribacteria	0.00146	0.00176	0.00015	0.00022	0.00108	10.0425	0.00796	0.0007	0.00204	0.00131	0.00131	0.00131	3.32804	3.32804
g__Lichtheimia	3e-05	9e-05	0.00134	0.00171	1e-05	0.01962	0.00092	-0.0024	-0.00038	-0.00131	-0.00131	0.00131	-5.67153	5.67153
g__Buchavirus	0.00152	0.00392	0.00022	0.00066	0.0025	6.9434	0.0138	9e-05	0.00302	0.00131	0.0013	0.0013	2.79564	2.79564
g__unclassified_p__Candidatus_Bipolaricaulota	0.00389	0.00349	0.00259	0.00159	0.3358	1.49934	0.4736	-0.0002	0.00293	0.0013	0.0013	0.0013	0.584328	0.584328
g__Duganella	0.00051	0.00043	0.00181	0.0012	0.00011	0.28036	0.00205	-0.00221	-0.00065	-0.0013	-0.0013	0.0013	-1.83465	1.83465
g__Paucisalibacillus	0.00087	0.00134	0.00217	0.00187	0.02024	0.40312	0.05938	-0.00264	-0.0001	-0.00129	-0.0013	0.0013	-1.31072	1.31072
g__Skeletonema	0.00134	0.00671	4e-05	7e-05	0.9112	37.377	0.9413	-5e-05	0.00397	0.0013	0.0013	0.0013	5.22408	5.22408
g__Streptobacillus	0.00418	0.00732	0.00288	0.00346	0.9549	1.44957	0.9735	-0.00191	0.00523	0.0013	0.0013	0.0013	0.535625	0.535625
g__Caldanaerobius	0.00623	0.00386	0.00494	0.00208	0.4617	1.25973	0.5864	-0.0007	0.00326	0.00128	0.00129	0.00129	0.333115	0.333115
g__Candida	0.00136	0.00507	7e-05	0.00015	0.02426	18.4874	0.0684	0.00011	0.00335	0.00128	0.00129	0.00129	4.20847	4.20847
g__Plesiocystis	0.00142	0.00721	0.00013	0.00034	0.04566	11.2294	0.1113	-0.00025	0.00423	0.00129	0.00129	0.00129	3.48921	3.48921
g__Methyloversatilis	0.00345	0.00399	0.00216	0.00266	0.2993	1.59709	0.4387	-0.00094	0.00347	0.00129	0.00129	0.00129	0.675446	0.675446
g__Pararhodobacter	0.00157	0.0012	0.00028	0.00031	0.00238	5.62221	0.01325	0.00078	0.00176	0.00129	0.00129	0.00129	2.49114	2.49114
g__Sodalis	0.00137	0.00203	8e-05	0.00013	0.01174	16.8448	0.04145	0.0006	0.00214	0.00129	0.00129	0.00129	4.07423	4.07423
g__Thermotoga	0.00128	0.0008	0.00256	0.00253	0.2345	0.49906	0.3594	-0.00302	0.0001	-0.00128	-0.00128	0.00128	-1.00271	1.00271
g__Mohonavirus	0.00128	0.00631	0	0	0.4253	0	0.5493	0	0.00385	0.00128	0.00128	0.00128	#NUM!	#NUM!
g__Anaeromusa	0.00617	0.00388	0.00745	0.0031	0.2345	0.82924	0.3594	-0.00354	0.00133	-0.00127	-0.00128	0.00128	-0.270138	0.270138
g__Anaerosolibacter	0.00987	0.00801	0.00859	0.00398	0.8949	1.1491	0.9258	-0.00285	0.00549	0.00128	0.00128	0.00128	0.200504	0.200504
g__Dactylosporangium	0.00119	0.00377	0.00247	0.00313	0.03296	0.47998	0.08592	-0.00361	0.0011	-0.00128	-0.00128	0.00128	-1.05895	1.05895
g__Ruminococcoides	0.00227	0.00209	0.00099	0.00081	0.05193	2.28301	0.1211	0.00036	0.00223	0.00128	0.00128	0.00128	1.19094	1.19094
g__Methylomicrobium	0.00195	0.00215	0.00067	0.00087	0.03969	2.89888	0.099	0.00035	0.00222	0.00128	0.00128	0.00128	1.5355	1.5355
g__Jiangella	0.00077	0.00174	0.00204	0.00258	0.00305	0.38018	0.01511	-0.0032	0.00015	-0.00126	-0.00127	0.00127	-1.39525	1.39525
g__Rufibacter	0.00248	0.00217	0.00121	0.00177	0.01085	2.05577	0.03929	-4e-05	0.00253	0.00128	0.00127	0.00127	1.03968	1.03968
g__Acidovorax	0.00282	0.00235	0.00155	0.0016	0.1087	1.82533	0.2	-0.00011	0.00252	0.00128	0.00127	0.00127	0.868157	0.868157
g__Algoriphagus	0.00317	0.00275	0.0019	0.00091	0.2655	1.67233	0.3985	0.0002	0.0025	0.00128	0.00127	0.00127	0.74186	0.74186
g__Candidatus_Avibacteroides	0.00152	0.002	0.00025	0.00031	0.00971	6.06477	0.0359	0.0006	0.00213	0.00127	0.00127	0.00127	2.60045	2.60045
g__Candidatus_Phaeomarinobacter	0.00128	0.00203	1e-05	2e-05	0.00182	136.261	0.01124	0.00061	0.0021	0.00127	0.00127	0.00127	7.09023	7.09023
g__Oligella	0.00028	0.00047	0.00155	0.004	0.3723	0.18429	0.5161	-0.00396	0.00024	-0.00126	-0.00127	0.00127	-2.43995	2.43995
g__Aestuariivita	0.00139	0.00179	0.00012	0.00015	0.00094	12.0377	0.00718	0.00064	0.00198	0.00128	0.00127	0.00127	3.58949	3.58949
g__Ferruginivarius	0.00127	0.00204	3.95774e-06	1e-05	0.00016	321.503	0.00249	0.00059	0.00218	0.00127	0.00126604	0.00126604	8.32869	8.32869
g__Shimia	0.00186	0.00311	0.0006	0.00133	0.01741	3.09506	0.05319	-6e-05	0.00279	0.00126	0.00126	0.00126	1.62997	1.62997
g__Petrotoga	0.00193	0.00172	0.00067	0.00055	0.02472	2.90917	0.0684	0.0006	0.00206	0.00127	0.00126	0.00126	1.54061	1.54061
g__Cedecea	7e-05	0.00014	0.00133	0.00343	0.0056	0.05309	0.02314	-0.00357	-4e-05	-0.00126	-0.00126	0.00126	-4.23542	4.23542
g__Neocallimastix	0.00262	0.00406	0.00136	0.00173	0.5842	1.92381	0.6902	-0.00054	0.00318	0.00126	0.00126	0.00126	0.943966	0.943966
g__Paraphysoderma	0.00146	0.00697	0.0002	0.00021	0.00143	7.36697	0.00934	-0.00022	0.00526	0.00126	0.00126	0.00126	2.88107	2.88107
g__Marinicauda	0.0013	0.00199	4e-05	7e-05	0.00418	33.8707	0.01888	0.0006	0.00207	0.00126	0.00126	0.00126	5.08197	5.08197
g__Parastagonospora	1.07638e-06	1e-05	0.00126	0.0033	5.429e-07	0.00085	0.00026	-0.00351	-9e-05	-0.00126	-0.00125892	0.00125892	-10.2002	10.2002
g__Paenalcaligenes	0.00139	0.00162	0.00014	0.00018	9e-05	10.2609	0.00187	0.00071	0.00196	0.00126	0.00125	0.00125	3.35909	3.35909
g__Cardiobacterium	8e-05	0.00017	0.00133	0.00197	0.00022	0.06068	0.00308	-0.00264	-0.00031	-0.00125	-0.00125	0.00125	-4.04264	4.04264
g__Candidatus_Apopatousia	0.00132	0.00141	7e-05	9e-05	0.00031	20.2441	0.00368	0.00077	0.00181	0.00125	0.00125	0.00125	4.33943	4.33943
g__Seonamhaeicola	0.00126	0.00157	1e-05	3e-05	3e-05	95.418	0.00144	0.00077	0.00186	0.00125	0.00125	0.00125	6.57619	6.57619
g__Actinomarinicola	0.00274	0.0065	0.00149	0.00194	0.5089	1.83861	0.6321	-0.00108	0.00438	0.00125	0.00125	0.00125	0.878615	0.878615
g__Microcella	0.00021	0.00047	0.00146	0.00103	0.00012	0.14543	0.00214	-0.00193	-0.00063	-0.00125	-0.00125	0.00125	-2.7816	2.7816
g__Desulfatitalea	0.00712	0.00559	0.00587	0.00312	0.7484	1.21335	0.8117	-0.00155	0.00411	0.00125	0.00125	0.00125	0.278996	0.278996
g__Congzhengia	0.01241	0.00723	0.01365	0.00744	0.6919	0.90904	0.771	-0.00658	0.00386	-0.00124	-0.00124	0.00124	-0.137584	0.137584
g__Riemerella	0.00389	0.0041	0.00513	0.01347	0.04752	0.75778	0.1144	-0.01091	0.00425	-0.00124	-0.00124	0.00124	-0.400149	0.400149
g__Candidatus_Gallimonas	0.00182	0.00171	0.00058	0.00107	0.0021	3.16367	0.01215	0.00028	0.00216	0.00125	0.00124	0.00124	1.6616	1.6616
g__Ehrlichia	0.0014	0.00238	0.00016	0.00044	0.0065	8.68635	0.02637	0.00036	0.00219	0.00124	0.00124	0.00124	3.11875	3.11875
g__Algicola	0.00128	0.00198	4e-05	8e-05	0.00059	29.4108	0.00523	0.00058	0.00204	0.00123	0.00124	0.00124	4.87828	4.87828
g__Candidatus_Competibacter	0.00154	0.00175	0.00277	0.00583	0.6643	0.55763	0.7467	-0.00546	0.00138	-0.00122	-0.00123	0.00123	-0.84262	0.84262
g__unclassified_p__Bacteroidota	0.00166	0.0013	0.00043	0.00057	0.00493	3.88412	0.02124	0.00063	0.00186	0.00123	0.00123	0.00123	1.95759	1.95759
g__Thermopetrobacter	0.00163	0.00218	0.0004	0.00104	0.00618	4.08118	0.02533	0.00012	0.00229	0.00123	0.00123	0.00123	2.02899	2.02899
g__unclassified_p__candidate_division_CSSED10-310	0.00188	0.0025	0.00065	0.00055	0.22	2.90493	0.3471	0.00028	0.00227	0.00124	0.00123	0.00123	1.5385	1.5385
g__Zooshikella	0.00133	0.00161	0.0001	0.00013	0.00094	13.5855	0.00718	0.00066	0.00191	0.00123	0.00123	0.00123	3.76399	3.76399
g__Thetidibacter	0.00126	0.00183	3e-05	5e-05	0.00318	41.2999	0.01553	0.0006	0.00201	0.00123	0.00123	0.00123	5.36807	5.36807
g__Cryptobacterium	0.0003	0.00029	0.00152	0.00105	0.00017	0.19843	0.00265	-0.00193	-0.00063	-0.00122	-0.00122	0.00122	-2.3333	2.3333
g__Quaeritorhiza	0.00128	0.00637	6e-05	0.00013	0.7088	20.7833	0.7878	-0.0001	0.0038	0.00122	0.00122	0.00122	4.37736	4.37736
g__Iodovirus	0.00122	0.00606	0	0	0.1725	0	0.2847	1e-05	0.00362	0.00123	0.00122	0.00122	#NUM!	#NUM!
g__unclassified_p__Candidatus_Raymondiibacteriota	0.00129	0.0018	7e-05	0.00012	0.00035	17.7583	0.004	0.00063	0.00199	0.00122	0.00122	0.00122	4.15042	4.15042
g__Kangiella	0.00125	0.00162	3e-05	8e-05	8e-05	42.9677	0.00168	0.00067	0.00191	0.00123	0.00122	0.00122	5.42518	5.42518
g__Oryzihumus	0.00012	0.00026	0.00134	0.00268	0.00073	0.09115	0.00602	-0.00317	-0.00015	-0.00122	-0.00122	0.00122	-3.45561	3.45561
g__Budvicia	0.00133	0.00171	0.00254	0.00417	0.2345	0.52284	0.3594	-0.00415	0.00085	-0.00121	-0.00121	0.00121	-0.935559	0.935559
g__Candidatus_Equicaccousia	0.00174	0.00083	0.00053	0.0003	0.00027	3.27451	0.00332	0.00086	0.00158	0.00121	0.00121	0.00121	1.71128	1.71128
g__Nonlabens	0.00135	0.00152	0.00014	0.00017	0.00096	9.36281	0.00718	0.00066	0.00179	0.00121	0.00121	0.00121	3.22694	3.22694
g__Pararhodospirillum	0.00165	0.00235	0.00044	0.00041	0.3939	3.7373	0.5391	0.00043	0.00225	0.00121	0.00121	0.00121	1.902	1.902
g__Dichotomocladium	3e-05	0.00011	0.00124	0.00232	0.00036	0.02111	0.00401	-0.00302	-5e-05	-0.00122	-0.00121	0.00121	-5.56593	5.56593
g__unclassified_p__Candidatus_Ryaniibacteriota	0.00122	0.00204	1e-05	3e-05	0.00263	136.818	0.01418	0.00053	0.00205	0.00121	0.00121	0.00121	7.09612	7.09612
g__Gulosibacter	0.00122	0.00086	1e-05	2e-05	3e-05	135.531	0.00144	0.0009	0.00155	0.00121	0.00121	0.00121	7.08248	7.08248
g__unclassified_c__Candidatus_Bathyarchaeia	0.00329	0.00537	0.0045	0.00668	0.7484	0.73211	0.8117	-0.00613	0.00318	-0.00121	-0.00121	0.00121	-0.449868	0.449868
g__Acetonema	0.00407	0.00408	0.00286	0.00181	0.5585	1.42327	0.6824	-0.00066	0.00332	0.00121	0.00121	0.00121	0.509209	0.509209
g__Heliobacterium	0.00148	0.00112	0.00268	0.0019	0.07925	0.55283	0.1677	-0.00243	5e-05	-0.0012	-0.0012	0.0012	-0.855092	0.855092
g__Zophobihabitans	0.00046	0.00038	0.00166	0.00225	0.02024	0.27488	0.05938	-0.00292	-0.00017	-0.00121	-0.0012	0.0012	-1.86313	1.86313
g__Levilactobacillus	0.00166	0.00313	0.00046	0.0004	0.2992	3.6388	0.4387	0.00025	0.00263	0.00121	0.0012	0.0012	1.86346	1.86346
g__Diplonema	0.00135	0.00623	0.00015	0.00032	0.9452	8.82168	0.9685	-0.00023	0.00376	0.0012	0.0012	0.0012	3.14105	3.14105
g__Methylopila	0.00126	0.0016	6e-05	6e-05	0.00059	20.0798	0.00522	0.00067	0.00183	0.0012	0.0012	0.0012	4.32767	4.32767
g__Persephonella	0.00128	0.00109	0.00248	0.00486	0.5585	0.51725	0.6824	-0.00452	0.00098	-0.0012	-0.0012	0.0012	-0.951066	0.951066
g__Thermoactinomyces	0.00227	0.00142	0.00107	0.00062	0.01492	2.11178	0.04976	0.0005	0.00186	0.00119	0.0012	0.0012	1.07846	1.07846
g__Kouleothrix	0.00034	0.00056	0.00154	0.00424	0.1569	0.21829	0.2656	-0.0041	0.00041	-0.00121	-0.0012	0.0012	-2.19568	2.19568
g__unclassified_p__Candidatus_Delongiibacteriota	0.00395	0.00175	0.00276	0.00235	0.07925	1.42891	0.1677	-0.0005	0.00273	0.00119	0.00119	0.00119	0.514915	0.514915
g__Anoxynatronum	0.00491	0.00444	0.00372	0.00163	0.7199	1.31823	0.7948	-0.00075	0.00318	0.00118	0.00119	0.00119	0.398602	0.398602
g__Pinibacter	0.00168	0.00424	0.00049	0.00069	0.1085	3.45218	0.2	-1e-05	0.00317	0.00119	0.00119	0.00119	1.78751	1.78751
g__Ammonifex	0.00032	0.00038	0.00151	0.00134	0.00125	0.21411	0.00855	-0.00202	-0.00044	-0.00119	-0.00119	0.00119	-2.22358	2.22358
g__Filimonas	0.00169	0.00545	0.0005	0.00059	0.4503	3.34048	0.5764	-0.0002	0.00367	0.00118	0.00119	0.00119	1.74006	1.74006
g__Sorangium	0.00182	0.00625	0.00063	0.00158	0.0183	2.88233	0.05526	-0.00072	0.00429	0.00119	0.00119	0.00119	1.52724	1.52724
g__Kluyveromyces	0.00133	0.00668	0.00014	0.00025	0.1769	9.84665	0.2902	-0.00025	0.00393	0.0012	0.00119	0.00119	3.29963	3.29963
g__Salirhabdus	0.00245	0.00467	0.00126	0.00189	0.365	1.94495	0.5075	-0.00082	0.00361	0.00119	0.00119	0.00119	0.959733	0.959733
g__Metallumcola	0.0012	0.00094	1e-05	2e-05	5e-05	146.517	0.00163	0.00088	0.00156	0.0012	0.00119	0.00119	7.19492	7.19492
g__Desulfogranum	0.00374	0.00282	0.00255	0.00096	0.4617	1.4638	0.5864	-0.0001	0.00251	0.00118	0.00119	0.00119	0.549718	0.549718
g__unclassified_f__Inoviridae	0.00365	0.00238	0.00483	0.00383	0.5842	0.75521	0.6902	-0.0039	0.00123	-0.00118	-0.00118	0.00118	-0.40505	0.40505
g__Halothermothrix	0.00169	0.00278	0.00051	0.00042	0.2061	3.31022	0.329	0.00028	0.00243	0.00118	0.00118	0.00118	1.72693	1.72693
g__Smaragdicoccus	0.0019	0.00938	0.00072	0.00121	0.2581	2.65597	0.3905	-0.00132	0.00621	0.00119	0.00118	0.00118	1.40924	1.40924
g__Modicisalibacter	0.0007	0.0007	0.00188	0.00133	0.01492	0.37348	0.04976	-0.00205	-0.00037	-0.00118	-0.00118	0.00118	-1.4209	1.4209
g__Balneola	0.00159	0.00178	0.00041	0.00066	0.01655	3.89905	0.05218	0.00046	0.00198	0.00119	0.00118	0.00118	1.96312	1.96312
g__Robbsia	0.0012	0.00157	2e-05	7e-05	8e-05	54.8845	0.00168	0.00067	0.00183	0.00118	0.00118	0.00118	5.77833	5.77833
g__Microvirga	0.02575	0.08412	0.02692	0.04267	0.9849	0.95677	0.9931	-0.04434	0.04616	-0.00116	-0.00117	0.00117	-0.0637559	0.0637559
g__Oceanotoga	0.00451	0.00437	0.00568	0.00599	0.3172	0.79435	0.4515	-0.00569	0.00243	-0.00117	-0.00117	0.00117	-0.332153	0.332153
g__Lactiplantibacillus	0.00131	0.00111	0.00248	0.00174	0.05193	0.52858	0.1211	-0.00233	1e-05	-0.00117	-0.00117	0.00117	-0.919806	0.919806
g__Lucifera	0.00263	0.00211	0.0038	0.00244	0.1264	0.69113	0.2251	-0.00285	0.00051	-0.00117	-0.00117	0.00117	-0.532971	0.532971
g__Aquiflexum	0.00125	0.00115	8e-05	6e-05	0.00013	15.3793	0.00224	0.00076	0.00158	0.00117	0.00117	0.00117	3.94292	3.94292
g__Neorickettsia	0.00117	0.00191	0	0	0.00773	0	0.03007	0.00056	0.00196	0.00117	0.00117	0.00117	#NUM!	#NUM!
g__Candidatus_Scatonaster	0.00056	0.00049	0.00172	0.00083	0.00048	0.32467	0.00451	-0.0017	-0.00062	-0.00116	-0.00116	0.00116	-1.62295	1.62295
g__unclassified_f__Holosporaceae	0.00152	0.00251	0.00036	0.00094	0.07808	4.24998	0.1673	0.00018	0.00242	0.00116	0.00116	0.00116	2.08746	2.08746
g__Pseudosphingobacterium	0.00118	0.00211	2e-05	6e-05	9e-05	54.3787	0.00186	0.00046	0.00197	0.00115	0.00116	0.00116	5.76497	5.76497
g__Pseudooceanicola	0.00136	0.00223	0.0002	0.00027	0.00238	6.95372	0.01325	0.00042	0.00216	0.00117	0.00116	0.00116	2.79778	2.79778
g__unclassified_o__Methanomassiliicoccales	0.00144	0.00193	0.00028	0.00023	0.1462	5.07166	0.2507	0.00046	0.00195	0.00115	0.00116	0.00116	2.34246	2.34246
g__Synchytrium	0.00128	0.00567	0.00013	0.00028	0.2038	10.1736	0.3277	-0.00016	0.0035	0.00115	0.00115	0.00115	3.34676	3.34676
g__Actinophytocola	0.00629	0.01276	0.00514	0.00647	0.5089	1.22455	0.6321	-0.00503	0.00784	0.00115	0.00115	0.00115	0.292252	0.292252
g__Ectobacillus	0.00183	0.0023	0.00298	0.00386	0.3172	0.61257	0.4515	-0.00406	0.00098	-0.00115	-0.00115	0.00115	-0.707053	0.707053
g__Maudiozyma	0.00115	0.00573	0	0	0.3123	0	0.4479	0	0.00343	0.00116	0.00115	0.00115	#NUM!	#NUM!
g__Denitrobacterium	0.00148	0.00188	0.00033	0.00042	0.0027	4.43304	0.01418	0.00049	0.00196	0.00115	0.00115	0.00115	2.1483	2.1483
g__Candidatus_Babela	0	0	0.00115	0.00215	0.00277	0	0.01418	-0.0027	-7e-05	-0.00115	-0.00115	0.00115	#NUM!	#NUM!
g__Xiashengella	0.00118	0.00106	3e-05	9e-05	4e-05	39.607	0.00149	0.00077	0.0016	0.00115	0.00115	0.00115	5.30768	5.30768
g__Flaviaesturariibacter	0.00116	0.00283	1e-05	2e-05	5e-05	88.2758	0.00163	0.00038	0.00235	0.00114	0.00115	0.00115	6.46395	6.46395
g__Marichromatium	0.00129	0.00188	0.00014	0.00026	0.00109	8.97533	0.00796	0.00049	0.00196	0.00114	0.00115	0.00115	3.16596	3.16596
g__Paramecium	0.00203	0.00766	0.00089	0.00176	0.1358	2.27749	0.2363	-0.00138	0.00499	0.00114	0.00114	0.00114	1.18744	1.18744
g__Kurthia	0.00301	0.00274	0.00415	0.00218	0.1683	0.72564	0.282	-0.00276	0.0008	-0.00114	-0.00114	0.00114	-0.462674	0.462674
g__Thermosipho	0.00357	0.00259	0.00243	0.00182	0.3751	1.46609	0.5166	-0.00026	0.00269	0.00113	0.00114	0.00114	0.551974	0.551974
g__Marinospirillum	0.00034	0.0004	0.00148	0.00134	0.00552	0.22816	0.02294	-0.00205	-0.00034	-0.00114	-0.00114	0.00114	-2.13188	2.13188
g__unclassified_o__Nanoarchaeales	0.00116	0.00577	2e-05	5e-05	0.4633	63.7187	0.5881	-2e-05	0.00342	0.00114	0.00114	0.00114	5.99365	5.99365
g__unclassified_f__Marseilleviridae	0.00119	0.0035	6e-05	0.00012	0.3838	19.4891	0.5271	0.00013	0.00278	0.00113	0.00113	0.00113	4.28459	4.28459
g__Gemmobacter	0.00135	0.00304	0.00248	0.00559	0.6643	0.54375	0.7467	-0.00501	0.00166	-0.00113	-0.00113	0.00113	-0.878985	0.878985
g__Nocardiopsis	0.00214	0.00268	0.00101	0.00143	0.05658	2.11445	0.13	-0.0001	0.00265	0.00113	0.00113	0.00113	1.08028	1.08028
g__Tumebacillus	0.00213	0.00163	0.001	0.00057	0.03297	2.13838	0.08592	0.00046	0.00188	0.00113	0.00113	0.00113	1.09652	1.09652
g__Stagonospora	0	0	0.00113	0.00334	0.00044	0	0.00421	-0.00337	-1e-05	-0.00114	-0.00113	0.00113	#NUM!	#NUM!
g__Candidatus_Aadella	4.73776e-06	2e-05	0.00113	0.00276	5.177e-07	0.00418	0.00026	-0.00299	-0.00012	-0.00113	-0.00112526	0.00112526	-7.90228	7.90228
g__Candidatus_Homeothermus	0.00113	0.00107	4.86247e-06	1e-05	3e-05	233.344	0.00144	0.00074	0.00154	0.00113	0.00112514	0.00112514	7.86631	7.86631
g__Bilifractor	0.00279	0.00347	0.00167	0.00194	0.5089	1.66786	0.6321	-0.00071	0.00294	0.00112	0.00112	0.00112	0.737998	0.737998
g__Actinopolymorpha	0.00095	0.00281	0.00207	0.00335	0.03228	0.45822	0.08497	-0.00388	0.00093	-0.00112	-0.00112	0.00112	-1.12589	1.12589
g__Methylocella	0.00163	0.00173	0.00051	0.00094	0.00696	3.21039	0.0278	0.00023	0.00203	0.00112	0.00112	0.00112	1.68275	1.68275
g__Desulfovermiculus	0.00146	0.00144	0.00034	0.00035	0.00437	4.26721	0.01926	0.00058	0.00178	0.00112	0.00112	0.00112	2.09329	2.09329
g__Lapidilactobacillus	8e-05	0.0001	0.0012	0.00177	8e-05	0.06289	0.00168	-0.00233	-0.00032	-0.00112	-0.00112	0.00112	-3.99103	3.99103
g__Allisonella	0.00017	0.00014	0.00128	0.00119	0.00109	0.13458	0.00796	-0.00185	-0.00045	-0.00111	-0.00111	0.00111	-2.89346	2.89346
g__Desulfovulcanus	0.00135	0.001	0.00024	0.00046	0.00301	5.51369	0.01511	0.00061	0.00157	0.0011	0.00111	0.00111	2.46302	2.46302
g__Glaciibacter	0.00025	0.00074	0.00136	0.00184	0.00181	0.18715	0.01121	-0.00237	-7e-05	-0.00111	-0.00111	0.00111	-2.41773	2.41773
g__Marinoscillum	0.00119	0.00118	8e-05	0.00018	0.00016	15.2497	0.00258	0.00069	0.0016	0.00111	0.00111	0.00111	3.93071	3.93071
g__Snuella	0.00121	0.00391	0.0001	0.00018	0.02188	12.1007	0.0634	0.00015	0.0029	0.00111	0.00111	0.00111	3.59702	3.59702
g__Thermogutta	0.00122	0.00122	0.00011	0.00021	0.00031	10.7526	0.00368	0.00066	0.00157	0.00111	0.00111	0.00111	3.42662	3.42662
g__Butyribacter	0.00158	0.00162	0.00268	0.00303	0.2819	0.59038	0.4177	-0.00331	0.00059	-0.0011	-0.0011	0.0011	-0.760284	0.760284
g__Heliophilum	0.00065	0.00086	0.00175	0.00137	0.04754	0.37053	0.1144	-0.00196	-0.0002	-0.0011	-0.0011	0.0011	-1.43234	1.43234
g__Candidatus_Thioglobus	0.00167	0.00251	0.00057	0.00096	0.00554	2.90658	0.02294	0.0001	0.0023	0.00109	0.0011	0.0011	1.53932	1.53932
g__Pseudobacter	0.00119	0.00193	9e-05	0.0001	0.00089	13.8392	0.00689	0.00052	0.002	0.00111	0.0011	0.0011	3.79069	3.79069
g__Methanoplanus	0.00115	0.00182	5e-05	9e-05	0.00019	23.849	0.00292	0.0005	0.00183	0.0011	0.0011	0.0011	4.57586	4.57586
g__Paranosema	0.0011	0.00516	0	0	0.232	0	0.3579	1e-05	0.00326	0.0011	0.0011	0.0011	#NUM!	#NUM!
g__Calorimonas	0.00359	0.0023	0.00249	0.00132	0.2061	1.44255	0.329	-0.00015	0.00212	0.0011	0.0011	0.0011	0.528621	0.528621
g__Desulfofalx	0.00257	0.00293	0.00147	0.00106	0.8651	1.74895	0.9028	-0.00013	0.00238	0.0011	0.0011	0.0011	0.806489	0.806489
g__Mageeibacillus	0.00189	0.00227	0.00079	0.00073	0.1311	2.40732	0.2303	0.00019	0.00221	0.00111	0.0011	0.0011	1.26743	1.26743
g__Aquitalea	0.00028	0.0003	0.00138	0.00298	0.1739	0.20068	0.2862	-0.00311	6e-05	-0.0011	-0.0011	0.0011	-2.31703	2.31703
g__Panacibacter	0.00113	0.00301	3e-05	0.0001	0.00024	33.8008	0.00312	0.00037	0.00237	0.0011	0.0011	0.0011	5.07899	5.07899
g__Hominimerdicola	0.00166	0.00251	0.00057	0.00064	0.3172	2.91342	0.4515	0.00013	0.00226	0.00109	0.00109	0.00109	1.54271	1.54271
g__Rhodobium	0.00118	0.0019	9e-05	0.00012	0.00344	13.8252	0.01618	0.00048	0.00195	0.0011	0.00109	0.00109	3.78922	3.78922
g__Belliella	0.00122	0.00118	0.00013	0.00022	0.00076	9.47803	0.00609	0.00066	0.00154	0.00109	0.00109	0.00109	3.24459	3.24459
g__Asteriusvirus	0.00109	0.00507	0	0	0.06856	0	0.1496	3e-05	0.00315	0.00109	0.00109	0.00109	#NUM!	#NUM!
g__Sandarakinorhabdus	0.00113	0.00172	4e-05	7e-05	0.00842	28.7338	0.03213	0.00053	0.00184	0.00109	0.00109	0.00109	4.84468	4.84468
g__Phaeobacter	0.00113	0.00233	4e-05	7e-05	0.00014	29.4274	0.00235	0.00036	0.00212	0.00109	0.00109	0.00109	4.87909	4.87909
g__Marinisporobacter	0.01577	0.00865	0.01685	0.0117	0.8949	0.93608	0.9258	-0.00989	0.00626	-0.00108	-0.00108	0.00108	-0.0952963	0.0952963
g__Ottowia	0.00891	0.01206	0.00999	0.01212	0.6104	0.89189	0.6972	-0.0107	0.00685	-0.00108	-0.00108	0.00108	-0.165062	0.165062
g__Lewinella	0.00128	0.00108	0.0002	0.00034	0.00083	6.40332	0.00655	0.00065	0.00159	0.00108	0.00108	0.00108	2.67882	2.67882
g__Hyunsoonleella	0.0011	0.00106	2e-05	5e-05	0.00018	44.6437	0.00271	0.00068	0.00152	0.00108	0.00108	0.00108	5.48038	5.48038
g__Chthonobacter	8e-05	0.00017	0.00116	0.0013	9e-05	0.06825	0.00187	-0.00199	-0.00039	-0.00108	-0.00108	0.00108	-3.87303	3.87303
g__Pseudoscardovia	0.00112	0.00238	4e-05	6e-05	0.03667	28.1567	0.09291	0.00034	0.00207	0.00108	0.00108	0.00108	4.81541	4.81541
g__Lautropia	0.0015	0.0018	0.00043	0.00047	0.02028	3.51456	0.05938	0.00036	0.00188	0.00108	0.00107	0.00107	1.81334	1.81334
g__unclassified_f__Pasteurellaceae	0.00027	0.00044	0.00134	0.00261	0.01492	0.19799	0.04976	-0.00285	3e-05	-0.00108	-0.00107	0.00107	-2.3365	2.3365
g__unclassified_p__Candidatus_Krumholzibacteriota	6e-05	0.00013	0.00113	0.00253	0.6957	0.0509	0.7751	-0.00275	4e-05	-0.00107	-0.00107	0.00107	-4.29619	4.29619
g__Ciceribacter	0.00113	0.00136	6e-05	0.00013	0.00038	18.2098	0.00412	0.00059	0.00169	0.00106	0.00107	0.00107	4.18664	4.18664
g__Prosthecochloris	0.00143	0.00095	0.00036	0.0004	0.00162	3.92119	0.01018	0.00066	0.0015	0.00106	0.00107	0.00107	1.97129	1.97129
g__Blepharisma	0.00013	0.00041	0.0012	0.00238	0.0023	0.10986	0.0132	-0.00279	0.0001	-0.00107	-0.00107	0.00107	-3.18626	3.18626
g__Thiocystis	0.0014	0.00184	0.00033	0.00048	0.02995	4.25564	0.07983	0.00038	0.0019	0.00107	0.00107	0.00107	2.08938	2.08938
g__Muricoprocola	0.00492	0.00581	0.00385	0.00303	0.9549	1.27844	0.9735	-0.00159	0.00411	0.00107	0.00107	0.00107	0.354384	0.354384
g__Trichococcus	0.01534	0.00756	0.01428	0.00513	0.9849	1.07438	0.9931	-0.00322	0.00539	0.00106	0.00106	0.00106	0.103504	0.103504
g__Anaerococcus	0.00856	0.00581	0.00962	0.00386	0.3958	0.88994	0.5391	-0.00421	0.00243	-0.00106	-0.00106	0.00106	-0.16822	0.16822
g__Caballeronia	0.00322	0.00269	0.00216	0.0019	0.2497	1.49284	0.3786	-0.00054	0.00243	0.00106	0.00106	0.00106	0.57806	0.57806
g__Kenoshavirus	0.00128	0.00206	0.00022	0.00056	0.02633	5.88427	0.07221	0.0003	0.00201	0.00106	0.00106	0.00106	2.55686	2.55686
g__Phaeodactylibacter	0.00277	0.0025	0.00171	0.00141	0.2821	1.6231	0.4177	-0.00022	0.00238	0.00106	0.00106	0.00106	0.698752	0.698752
g__Roseospira	0.00148	0.00191	0.00042	0.00073	0.02237	3.51006	0.0641	0.00027	0.002	0.00106	0.00106	0.00106	1.8115	1.8115
g__unclassified_p__candidate_division_WWE3	0.00212	0.00444	0.00106	0.00111	1	2.00142	1	-0.00049	0.00308	0.00106	0.00106	0.00106	1.00102	1.00102
g__Peltigera	0	0	0.00106	0.00214	1e-05	0	0.00092	-0.0026	-8e-05	-0.00106	-0.00106	0.00106	#NUM!	#NUM!
g__Hydrogenovibrio	0.00117	0.00183	0.00011	0.00018	0.02665	10.5851	0.07296	0.00045	0.00184	0.00106	0.00106	0.00106	3.40396	3.40396
g__Mastadenovirus	0.00106	0.00416	0	0	0.02469	0	0.0684	0.00012	0.00289	0.00106	0.00106	0.00106	#NUM!	#NUM!
g__Murdochiella	0.00115	0.00085	0.0022	0.00166	0.09305	0.52543	0.1905	-0.0021	8e-05	-0.00104	-0.00105	0.00105	-0.92843	0.92843
g__Flagellimonas	0.00193	0.00185	0.00088	0.0006	0.1462	2.19731	0.2507	0.00027	0.00191	0.00105	0.00105	0.00105	1.13574	1.13574
g__Vreelandella	0.00153	0.00158	0.00258	0.00299	0.4171	0.59254	0.5493	-0.00314	0.00066	-0.00105	-0.00105	0.00105	-0.755016	0.755016
g__Christiangramia	0.00147	0.00155	0.00042	0.00068	0.00968	3.52954	0.0359	0.00031	0.00176	0.00106	0.00105	0.00105	1.81948	1.81948
g__Hydrogenimonas	0.00123	0.00249	0.00018	0.00013	0.0011	6.78609	0.00796	0.00039	0.0022	0.00105	0.00105	0.00105	2.76258	2.76258
g__Xylophilus	8e-05	0.00018	0.00113	0.00079	3e-05	0.06808	0.00144	-0.00158	-0.00059	-0.00106	-0.00105	0.00105	-3.87663	3.87663
g__Lacimicrobium	0.00106	0.00141	1e-05	4e-05	8e-05	81.9866	0.00168	0.0006	0.00167	0.00104	0.00105	0.00105	6.35732	6.35732
g__Clathrospora	0	0	0.00105	0.00299	0.00044	0	0.00421	-0.00305	-1e-05	-0.00105	-0.00105	0.00105	#NUM!	#NUM!
g__Methanofollis	0.00018	0.00015	0.00123	0.00093	4e-05	0.14381	0.00149	-0.00167	-0.00052	-0.00105	-0.00105	0.00105	-2.79776	2.79776
g__Dolosicoccus	0.00107	0.00188	2e-05	4e-05	0.00137	52.0834	0.00922	0.00042	0.00193	0.00105	0.00105	0.00105	5.70275	5.70275
g__Gorgonomyces	0.00117	0.0057	0.00012	0.00014	0.06154	9.83034	0.1388	-0.00014	0.00344	0.00105	0.00105	0.00105	3.29724	3.29724
g__Mesobacillus	0.00451	0.00382	0.00556	0.00315	0.2821	0.81162	0.4177	-0.00372	0.00121	-0.00105	-0.00105	0.00105	-0.301124	0.301124
g__Syntrophaceticus	0.00505	0.005	0.00609	0.00265	0.1173	0.82851	0.2127	-0.00326	0.00144	-0.00105	-0.00104	0.00104	-0.271409	0.271409
g__Phormidesmis	0.0007	0.001	0.00174	0.00255	0.2809	0.4007	0.4177	-0.00287	0.00027	-0.00104	-0.00104	0.00104	-1.31941	1.31941
g__Fulvivirga	0.00159	0.00152	0.00055	0.00055	0.02472	2.89431	0.0684	0.00041	0.00173	0.00104	0.00104	0.00104	1.53322	1.53322
g__Plantactinospora	0.00064	0.00213	0.00168	0.00222	0.04723	0.37781	0.1144	-0.0027	0.00053	-0.00105	-0.00104	0.00104	-1.40427	1.40427
g__Candidatus_Sabulitectum	0.00015	0.00024	0.00119	0.00343	0.4131	0.12762	0.5493	-0.00335	0.0002	-0.00103	-0.00104	0.00104	-2.97007	2.97007
g__Muriventricola	0.00124	0.00099	0.00228	0.00189	0.1569	0.5432	0.2656	-0.00241	0.00011	-0.00104	-0.00104	0.00104	-0.880445	0.880445
g__Pseudoruegeria	0.00105	0.00107	1e-05	1e-05	1e-05	156.417	0.001	0.00067	0.00148	0.00105	0.00104	0.00104	7.28925	7.28925
g__Longimicrobium	0.00255	0.00223	0.00359	0.00288	0.3751	0.70931	0.5166	-0.00303	0.00081	-0.00105	-0.00104	0.00104	-0.495512	0.495512
g__Didymella	7.23325e-07	3.68825e-06	0.00104	0.00303	0.00238	0.0007	0.01325	-0.00306	-1e-05	-0.00104	-0.00103928	0.00103928	-10.4804	10.4804
g__Koleobacter	0.00223	0.00192	0.0012	0.00098	0.2061	1.85279	0.329	0.00011	0.002	0.00103	0.00103	0.00103	0.889699	0.889699
g__Shinella	0.00376	0.00387	0.00273	0.00204	0.6371	1.3769	0.7214	-0.00079	0.00289	0.00103	0.00103	0.00103	0.461424	0.461424
g__unclassified_p__Candidatus_Walliibacteriota	0.00131	0.00159	0.00234	0.00308	0.3358	0.56164	0.4736	-0.00328	0.00056	-0.00102	-0.00103	0.00103	-0.832282	0.832282
g__Belnapia	0.0015	0.00198	0.00047	0.00056	0.2819	3.16493	0.4177	0.00021	0.00187	0.00102	0.00103	0.00103	1.66217	1.66217
g__Glutamicibacter	7e-05	0.00015	0.0011	0.00116	4e-05	0.06001	0.00149	-0.00182	-0.00041	-0.00103	-0.00103	0.00103	-4.05865	4.05865
g__Dichotomicrobium	0.00109	0.00165	6e-05	0.00012	8e-05	19.7005	0.00168	0.00053	0.00179	0.00103	0.00103	0.00103	4.30016	4.30016
g__unclassified_f__Ochromonadaceae	0.00111	0.00174	8e-05	0.00012	0.169	14.1377	0.2829	0.00045	0.00169	0.00103	0.00103	0.00103	3.82147	3.82147
g__Umezawaea	0.00105	0.00319	0.00208	0.00323	0.4153	0.5032	0.5493	-0.00368	0.00123	-0.00103	-0.00103	0.00103	-0.990796	0.990796
g__Candidatus_Nitricoxidivorans	0.00104	0.00211	1e-05	2e-05	0.0376	128.636	0.09506	0.00034	0.00196	0.00103	0.00103	0.00103	7.00715	7.00715
g__Dimargaris	4e-05	0.00017	0.00107	0.00207	0.00011	0.03514	0.00213	-0.00243	-0.00011	-0.00104	-0.00103	0.00103	-4.83074	4.83074
g__Globisporangium	9e-05	0.00029	0.00112	0.00224	0.0005	0.0828	0.00469	-0.00259	-8e-05	-0.00103	-0.00103	0.00103	-3.59423	3.59423
g__Trichomonascus	0.00107	0.00536	4e-05	6e-05	0.02694	28.4237	0.07359	-6e-05	0.00316	0.00103	0.00103	0.00103	4.82902	4.82902
g__Propionispora	0.00662	0.00684	0.00764	0.0033	0.1462	0.86593	0.2507	-0.00429	0.00231	-0.00103	-0.00102	0.00102	-0.207678	0.207678
g__Venenivibrio	0.00102	0.00169	0	0	0.00074	0	0.00602	0.00047	0.00174	0.00102	0.00102	0.00102	#NUM!	#NUM!
g__Phaeosphaeria	0	0	0.00102	0.00293	1e-05	0	0.00092	-0.00299	-2e-05	-0.00102	-0.00102	0.00102	#NUM!	#NUM!
g__Candidatus_Egerieisoma	0.00563	0.00472	0.00461	0.00231	1	1.22127	1	-0.00118	0.00328	0.00102	0.00102	0.00102	0.288382	0.288382
g__Desulfoplanes	0.00326	0.00282	0.00225	0.00237	0.3358	1.4486	0.4736	-0.0009	0.0028	0.00101	0.00101	0.00101	0.534659	0.534659
g__Desulfarculus	0.00368	0.00328	0.00267	0.00396	0.1803	1.37745	0.2939	-0.00236	0.00353	0.00101	0.00101	0.00101	0.462	0.462
g__Schwartzia	0.00469	0.00527	0.00368	0.00189	0.7484	1.2735	0.8117	-0.00113	0.00356	0.00101	0.00101	0.00101	0.348799	0.348799
g__Helcococcus	0.005	0.00447	0.006	0.00585	0.7484	0.83362	0.8117	-0.00519	0.00282	-0.001	-0.001	0.001	-0.262538	0.262538
g__Candidatus_Apopatocola	0.00023	0.00019	0.00123	0.00125	0.00143	0.18641	0.00934	-0.00191	-0.00034	-0.001	-0.001	0.001	-2.42345	2.42345
g__Peredibacter	0.001	0.00173	0	0	0.00025	0	0.00312	0.00041	0.00169	0.001	0.001	0.001	#NUM!	#NUM!
g__Ketobacter	0.00102	0.00213	2e-05	6e-05	7e-05	51.8603	0.00163	0.0004	0.00192	0.001	0.001	0.001	5.69656	5.69656
g__Eshraghiella	0.00275	0.00238	0.00374	0.00243	0.2345	0.73666	0.3594	-0.00267	0.00083	-0.00098	-0.00099	0.00099	-0.440929	0.440929
g__Planomicrobium	0.00043	0.0006	0.00142	0.0013	0.03777	0.30514	0.09543	-0.00185	-0.00019	-0.00099	-0.00099	0.00099	-1.71246	1.71246
g__Candidatus_Avilachnospira	0.00052	0.00065	0.00151	0.00093	0.00238	0.34811	0.01325	-0.0016	-0.00039	-0.00098	-0.00099	0.00099	-1.52238	1.52238
g__Facklamia	0.00017	0.0003	0.00116	0.00128	0.00152	0.14979	0.00984	-0.00188	-0.00027	-0.00098	-0.00099	0.00099	-2.73899	2.73899
g__Limibaculum	0.00123	0.002	0.00024	0.00033	0.00916	5.2063	0.03425	0.00032	0.00178	0.001	0.00099	0.00099	2.38026	2.38026
g__Moellerella	5e-05	0.00011	0.00104	0.00114	5e-05	0.04458	0.00163	-0.00174	-0.00031	-0.001	-0.00099	0.00099	-4.48746	4.48746
g__Halteria	3e-05	5e-05	0.00102	0.00236	0.4581	0.03424	0.5852	-0.00274	2e-05	-0.00098	-0.00099	0.00099	-4.86817	4.86817
g__Candidatus_Fimenecus	0.00559	0.00338	0.00658	0.0043	0.4617	0.84924	0.5864	-0.00382	0.0016	-0.00099	-0.00099	0.00099	-0.235756	0.235756
g__Stomatobaculum	0.00889	0.00642	0.0079	0.00406	0.9549	1.12558	0.9735	-0.00253	0.00471	0.00099	0.00099	0.00099	0.170669	0.170669
g__Ascoidea	0.00103	0.00527	5e-05	0.00014	0.4817	22.7749	0.6076	-9e-05	0.0031	0.00099	0.00098	0.00098	4.50937	4.50937
g__Minicystis	0.00125	0.00549	0.00027	0.00056	0.2058	4.64762	0.329	-0.00043	0.00335	0.00098	0.00098	0.00098	2.21649	2.21649
g__Tractidigestivibacter	0.00101	0.00095	3e-05	8e-05	4e-05	31.0865	0.00148	0.00065	0.00138	0.00098	0.00098	0.00098	4.95822	4.95822
g__Tilletiaria	0.00098	0.00498	0	0	0.3123	0	0.4479	0	0.00391	0.00098	0.00098	0.00098	#NUM!	#NUM!
g__Paraflavisolibacter	0.00099	0.00309	1e-05	2e-05	6e-05	166.746	0.00163	0.00028	0.00222	0.00098	0.00098	0.00098	7.38151	7.38151
g__Aurantimonas	0.00275	0.00238	0.00177	0.0026	0.08593	1.55041	0.1797	-0.00084	0.00274	0.00098	0.00098	0.00098	0.63265	0.63265
g__Epilithonimonas	0.00128	0.00256	0.00031	0.00023	0.1129	4.11993	0.2069	0.00024	0.00214	0.00097	0.00097	0.00097	2.04262	2.04262
g__Sulfidibacter	0.00109	0.00109	0.00012	0.00026	0.00011	9.39567	0.00205	0.00057	0.00144	0.00097	0.00097	0.00097	3.232	3.232
g__Rugosibacter	0.00125	0.00166	0.00028	0.00069	0.05283	4.42216	0.1231	0.00019	0.00171	0.00097	0.00097	0.00097	2.14475	2.14475
g__Marinicella	0.00101	0.00147	4e-05	5e-05	0.00062	26.1856	0.00542	0.0005	0.00154	0.00097	0.00097	0.00097	4.7107	4.7107
g__Aliiroseovarius	0.00108	0.00245	0.00011	0.00016	0.00068	10.0418	0.00577	0.0003	0.00212	0.00098	0.00097	0.00097	3.32794	3.32794
g__Chlorobium	0.00237	0.00257	0.00334	0.0049	0.8949	0.71048	0.9258	-0.00473	0.00175	-0.00097	-0.00097	0.00097	-0.493134	0.493134
g__Actinomyces	0.002	0.00247	0.00103	0.00066	0.7771	1.9459	0.8343	2e-05	0.00218	0.00097	0.00097	0.00097	0.960438	0.960438
g__Sinomicrobium	0.00112	0.00092	0.00015	0.00026	0.00073	7.30911	0.00602	0.00059	0.00136	0.00097	0.00097	0.00097	2.8697	2.8697
g__Spirillospora	0.00112	0.00126	0.00015	0.00025	0.00094	7.68518	0.00718	0.00049	0.00148	0.00097	0.00097	0.00097	2.94208	2.94208
g__Pirellula	0.00129	0.00093	0.00032	0.00067	0.00083	3.99006	0.00655	0.00038	0.00145	0.00097	0.00097	0.00097	1.99641	1.99641
g__Advenella	0.00112	0.00236	0.00015	0.00028	0.00368	7.30144	0.01706	0.00026	0.00198	0.00097	0.00097	0.00097	2.86818	2.86818
g__Exserohilum	1e-05	4e-05	0.00098	0.00241	1e-05	0.00764	0.00092	-0.00261	-8e-05	-0.00097	-0.00097	0.00097	-7.03221	7.03221
g__Larkinella	0.00103	0.00099	7e-05	0.00014	0.00022	13.9777	0.0031	0.00057	0.00136	0.00096	0.00096	0.00096	3.80505	3.80505
g__Pseudorhizobium	0.00167	0.00286	0.00071	0.00093	0.136	2.35157	0.2363	-3e-05	0.00227	0.00096	0.00096	0.00096	1.23362	1.23362
g__Antonospora	0.001	0.00498	4e-05	8e-05	0.1003	27.2306	0.1908	-6e-05	0.003	0.00096	0.00096	0.00096	4.76716	4.76716
g__Lancefieldella	0.00099	0.00174	3e-05	5e-05	0.00044	31.1123	0.00429	0.0004	0.00172	0.00096	0.00096	0.00096	4.95941	4.95941
g__Musicola	0	0	0.00096	0.00101	1e-05	0	0.00092	-0.00163	-0.00038	-0.00096	-0.00096	0.00096	#NUM!	#NUM!
g__Arthrobacter	0.005	0.00792	0.00596	0.00593	0.5585	0.83973	0.6824	-0.00555	0.00361	-0.00095	-0.00096	0.00096	-0.252003	0.252003
g__Thalassobacillus	0.0013	0.00198	0.00034	0.00035	0.1263	3.78954	0.2251	0.00027	0.0019	0.00096	0.00096	0.00096	1.92202	1.92202
g__Candidatus_Magnetominusculus	0.00129	0.00204	0.00033	0.00028	0.1263	3.85351	0.2251	0.00031	0.00181	0.00096	0.00096	0.00096	1.94617	1.94617
g__Tardiphaga	0.00185	0.00525	0.0009	0.00149	0.3172	2.04571	0.4515	-0.00081	0.00331	0.00095	0.00095	0.00095	1.0326	1.0326
g__Thermosynergistes	0.00215	0.00335	0.0012	0.00171	0.9548	1.79178	0.9735	-0.00067	0.00258	0.00095	0.00095	0.00095	0.841394	0.841394
g__Phnomibacter	0.00109	0.00476	0.00014	0.00027	0.5798	7.83307	0.6902	-0.00012	0.00289	0.00095	0.00095	0.00095	2.96958	2.96958
g__Tateyamaria	0.001	0.00253	5e-05	8e-05	0.00066	20.9694	0.00565	0.00022	0.00212	0.00096	0.00095	0.00095	4.39022	4.39022
g__Perkinsus	0.00013	0.00032	0.00108	0.00233	0.00052	0.12009	0.00478	-0.00257	-5e-05	-0.00095	-0.00095	0.00095	-3.05781	3.05781
g__Xanthomarina	0.00106	0.00122	0.00011	0.00017	0.00156	9.65687	0.01002	0.00049	0.00144	0.00095	0.00095	0.00095	3.27156	3.27156
g__Gilvimarinus	0.00097	0.0014	2e-05	7e-05	0.00075	40.369	0.00605	0.00045	0.00149	0.00095	0.00095	0.00095	5.33518	5.33518
g__Apilactobacillus	0.00096	0.00085	1e-05	4e-05	2e-05	82.2451	0.0013	0.00061	0.0013	0.00095	0.00095	0.00095	6.36186	6.36186
g__Thermovenabulum	0.00267	0.00398	0.00173	0.00271	0.2993	1.54662	0.4387	-0.00145	0.00305	0.00094	0.00094	0.00094	0.629119	0.629119
g__Nostocoides	0.00099	0.00143	0.00193	0.00354	0.6104	0.51234	0.6972	-0.00346	0.00082	-0.00094	-0.00094	0.00094	-0.964827	0.964827
g__Casaltella	0.00123	0.00122	0.00217	0.00175	0.09305	0.56519	0.1905	-0.00218	9e-05	-0.00094	-0.00094	0.00094	-0.823192	0.823192
g__Chaetoceros	0.00103	0.005	9e-05	0.00015	0.06841	11.7823	0.1496	-0.00013	0.003	0.00095	0.00094	0.00094	3.55855	3.55855
g__Mucisphaera	0.00097	0.00159	3e-05	5e-05	0.00484	36.639	0.02104	0.00037	0.0016	0.00094	0.00094	0.00094	5.19531	5.19531
g__Autumnicola	0.00094	0.00112	0	0	4e-05	0	0.00144	0.00057	0.00142	0.00094	0.00094	0.00094	#NUM!	#NUM!
g__Brotomerdimonas	0.00511	0.00499	0.00417	0.0018	0.7771	1.2245	0.8343	-0.00108	0.00315	0.00094	0.00094	0.00094	0.292193	0.292193
g__Entomohabitans	0.00187	0.00226	0.00093	0.0015	0.157	2.01236	0.2656	-0.00033	0.0021	0.00094	0.00094	0.00094	1.00889	1.00889
g__Aceticella	0.00113	0.00073	0.0002	0.00023	0.00025	5.74178	0.00315	0.00063	0.00125	0.00093	0.00093	0.00093	2.5215	2.5215
g__Asaia	0.00093	0.00131	2.71743e-06	1e-05	0.00139	342.928	0.00932	0.00049	0.00146	0.00093	0.000927283	0.000927283	8.42176	8.42176
g__Candidatus_Ectomicrobium	0.00093	0.00153	2.73275e-06	1e-05	6e-05	338.991	0.00163	0.00041	0.0016	0.00092	0.000927267	0.000927267	8.4051	8.4051
g__Thauera	0.00907	0.00693	0.00815	0.00483	0.9849	1.11248	0.9931	-0.00296	0.00494	0.00092	0.00092	0.00092	0.153779	0.153779
g__Paracholeplasma	0.00207	0.002	0.00299	0.00234	0.3358	0.69147	0.4736	-0.00253	0.00074	-0.00092	-0.00092	0.00092	-0.532261	0.532261
g__Aureispira	0.00081	0.00105	0.00173	0.00188	0.3957	0.46863	0.5391	-0.00223	0.00031	-0.00092	-0.00092	0.00092	-1.09348	1.09348
g__Oenococcus	0.00096	0.00169	4e-05	0.0001	0.00043	25.4654	0.00421	0.00039	0.00168	0.00092	0.00092	0.00092	4.67047	4.67047
g__Jingyaoa	0.00196	0.00172	0.00287	0.00158	0.1087	0.68394	0.2	-0.00205	0.00024	-0.00091	-0.00091	0.00091	-0.548058	0.548058
g__Acididesulfobacillus	0.00069	0.00064	0.0016	0.00197	0.3172	0.42963	0.4515	-0.00225	0.00017	-0.00091	-0.00091	0.00091	-1.21883	1.21883
g__Pseudescherichia	0.00093	0.00402	0.00184	0.00405	0.06183	0.50618	0.139	-0.00414	0.00163	-0.00091	-0.00091	0.00091	-0.982278	0.982278
g__Pollutimonas	0.00158	0.00207	0.00067	0.00068	0.2497	2.35955	0.3786	9e-05	0.00192	0.00091	0.00091	0.00091	1.23851	1.23851
g__Ginsengibacter	0.00099	0.00287	8e-05	0.00015	0.00558	12.2653	0.02307	0.00017	0.0022	0.00091	0.00091	0.00091	3.61652	3.61652
g__Candidatus_Equibacterium	0.0011	0.00112	0.00019	0.00035	0.00547	5.76664	0.02294	0.00043	0.0014	0.00091	0.00091	0.00091	2.52773	2.52773
g__Setomelanomma	0	0	0.00091	0.00249	6e-05	0	0.00163	-0.00259	-2e-05	-0.00091	-0.00091	0.00091	#NUM!	#NUM!
g__Efquatrovirus	0.00091	0.0028	0	0	0.00203	0	0.01202	0.00014	0.00215	0.00091	0.00091	0.00091	#NUM!	#NUM!
g__Marivirga	0.0008	0.00215	0.00171	0.00222	0.01491	0.46804	0.04976	-0.00254	0.0007	-0.00091	-0.00091	0.00091	-1.0953	1.0953
g__Okeania	0.0015	0.0023	0.0006	0.00036	0.4617	2.5002	0.5864	0.00013	0.00186	0.0009	0.0009	0.0009	1.32204	1.32204
g__Desulfocicer	0.00119	0.00151	0.00029	0.00045	0.01489	4.13144	0.04976	0.00031	0.00154	0.0009	0.0009	0.0009	2.04664	2.04664
g__Mesostigma	3e-05	6e-05	0.00093	0.00129	7e-05	0.02897	0.00163	-0.0018	-0.00021	-0.0009	-0.0009	0.0009	-5.1093	5.1093
g__Pleurocapsa	0.00134	0.00183	0.00044	0.00054	0.07301	3.07167	0.1575	0.0002	0.00178	0.0009	0.0009	0.0009	1.61902	1.61902
g__Pimelobacter	0.00034	0.00093	0.00124	0.00154	0.00432	0.27359	0.01926	-0.00205	-1e-05	-0.0009	-0.0009	0.0009	-1.86991	1.86991
g__Candidatus_Fokinia	1e-05	6e-05	0.00091	0.00167	0.01532	0.01274	0.05078	-0.00205	0	-0.0009	-0.0009	0.0009	-6.29449	6.29449
g__Pavtokvirus	0.0009	0.00461	0	0	0.601	0	0.6902	0	0.00362	0.0009	0.0009	0.0009	#NUM!	#NUM!
g__Fischerella	4e-05	8e-05	0.00094	0.002	0.01134	0.04578	0.04076	-0.00225	-4e-05	-0.0009	-0.0009	0.0009	-4.44914	4.44914
g__Pseudanabaena	0.00225	0.00288	0.00135	0.00152	0.2655	1.66961	0.3985	-0.00057	0.00237	0.0009	0.0009	0.0009	0.739511	0.739511
g__Maliibacterium	0.01073	0.00556	0.00984	0.00336	0.5842	1.09085	0.6902	-0.0019	0.00393	0.00089	0.00089	0.00089	0.125453	0.125453
g__Candidatus_Celaenobacter	0.00093	0.00109	4e-05	7e-05	0.0003	22.1808	0.00364	0.00052	0.00133	0.00089	0.00089	0.00089	4.47124	4.47124
g__Paenimyroides	0.00092	0.00076	3e-05	8e-05	3e-05	30.6626	0.00144	0.00062	0.00122	0.00089	0.00089	0.00089	4.93841	4.93841
g__unclassified_o__Thermoplasmatales	0.0019	0.00269	0.00101	0.00062	0.3551	1.87802	0.4952	-0.0001	0.00214	0.00089	0.00089	0.00089	0.909212	0.909212
g__Candidatus_Syntrophopropionicum	0.00033	0.00024	0.00122	0.0014	0.03969	0.26623	0.099	-0.00187	-0.00017	-0.0009	-0.00089	0.00089	-1.90925	1.90925
g__Thermoflavifilum	0.00095	0.00362	6e-05	9e-05	0.1692	15.4325	0.2831	8e-05	0.00234	0.00089	0.00089	0.00089	3.9479	3.9479
g__Hydrogenophilus	0.0009	0.00129	1e-05	3e-05	0.00045	60.9684	0.00434	0.00046	0.00141	0.00088	0.00089	0.00089	5.92999	5.92999
g__Rubripirellula	0.00089	0.00149	3.80631e-06	1e-05	3e-05	234.621	0.00136	0.00037	0.00157	0.00089	0.000886194	0.000886194	7.87419	7.87419
g__Streptosporangium	0.00164	0.00188	0.00252	0.00422	0.3358	0.65287	0.4736	-0.00365	0.00157	-0.00087	-0.00088	0.00088	-0.615132	0.615132
g__Geitlerinema	0.00135	0.002	0.00047	0.00053	0.7771	2.87019	0.8343	7e-05	0.00177	0.00088	0.00088	0.00088	1.52115	1.52115
g__unclassified_c__Candidatus_Nanoarchaeia	0.00148	0.00116	0.0006	0.00076	0.01492	2.46746	0.04976	0.00023	0.00147	0.00088	0.00088	0.00088	1.30303	1.30303
g__Extensimonas	0.00054	0.00077	0.00142	0.00208	0.3081	0.38224	0.4479	-0.00238	0.00017	-0.00088	-0.00088	0.00088	-1.38745	1.38745
g__Hormoscilla	0.00109	0.00148	0.00021	0.0002	0.01139	5.2463	0.04084	0.0004	0.00153	0.00088	0.00088	0.00088	2.3913	2.3913
g__Wickerhamomyces	0.00097	0.00463	9e-05	0.00022	0.7606	10.5246	0.8227	-0.00014	0.00275	0.00088	0.00088	0.00088	3.3957	3.3957
g__Candidatus_Hakubella	0.0011	0.00135	0.00022	0.00035	0.00733	5.05217	0.02904	0.00038	0.00152	0.00089	0.00088	0.00088	2.3369	2.3369
g__Candidatus_Chromulinivorax	3e-05	0.0001	0.00091	0.0018	0.6303	0.03683	0.7175	-0.00187	4e-05	-0.00088	-0.00088	0.00088	-4.76297	4.76297
g__Candidatus_Shikimatogenerans	0.00088	0.0045	0	0	0.4253	0	0.5493	0	0.00353	0.00088	0.00088	0.00088	#NUM!	#NUM!
g__Bythopirellula	0.00122	0.0016	0.00034	0.00045	0.00696	3.6164	0.0278	0.00028	0.00163	0.00088	0.00088	0.00088	1.85455	1.85455
g__Clydaea	0.00113	0.00565	0.00025	0.00041	0.01284	4.56232	0.04434	-0.00044	0.00324	0.00089	0.00088	0.00088	2.18977	2.18977
g__Thermodesulfobacterium	0.00243	0.0021	0.0033	0.00193	0.3551	0.73774	0.4952	-0.00223	0.00063	-0.00087	-0.00087	0.00087	-0.438816	0.438816
g__Polaromonas	0.00333	0.00365	0.00246	0.00202	0.9549	1.35439	0.9735	-0.00108	0.00283	0.00087	0.00087	0.00087	0.437643	0.437643
g__Terracidiphilus	0.00107	0.0005	0.00194	0.00321	0.7199	0.5528	0.7948	-0.00293	0.00057	-0.00087	-0.00087	0.00087	-0.85517	0.85517
g__Raineya	0.00101	0.00111	0.00014	0.0003	0.00123	7.36709	0.00855	0.00047	0.00135	0.00087	0.00087	0.00087	2.88109	2.88109
g__Thermomicrobium	0.00148	0.007	0.00061	0.00097	0.05458	2.42589	0.1268	-0.0009	0.00398	0.00087	0.00087	0.00087	1.27851	1.27851
g__Stecheria	0.0001	0.0004	0.00097	0.00169	4e-05	0.10239	0.00148	-0.00206	-0.00016	-0.00087	-0.00087	0.00087	-3.28785	3.28785
g__Candidatus_Micrarchaeum	0.00087	0.00189	0	0	0.00506	0	0.02145	0.00027	0.00167	0.00087	0.00087	0.00087	#NUM!	#NUM!
g__Galbibacter	0.00087	0.00093	0	0	1e-05	0	0.00092	0.00052	0.00125	0.00087	0.00087	0.00087	#NUM!	#NUM!
g__Sediminitomix	0.0009	0.00136	3e-05	9e-05	0.00012	29.3847	0.00224	0.00044	0.00142	0.00087	0.00087	0.00087	4.87699	4.87699
g__Athalassotoga	0.00087	0.00151	0	0	7e-05	0	0.00163	0.00037	0.00153	0.00087	0.00087	0.00087	#NUM!	#NUM!
g__Peloplasma	0.001	0.0009	0.00187	0.0017	0.2061	0.53691	0.329	-0.00205	0.00018	-0.00087	-0.00087	0.00087	-0.897248	0.897248
g__Tepidanaerobacter	0.01983	0.01055	0.0207	0.0071	0.7771	0.95793	0.8343	-0.00757	0.00481	-0.00087	-0.00087	0.00087	-0.0620079	0.0620079
g__Azoarcus	0.00616	0.00549	0.00702	0.00367	0.2993	0.87671	0.4387	-0.00407	0.00234	-0.00087	-0.00086	0.00086	-0.189828	0.189828
g__Ornithinibacillus	0.00267	0.00156	0.00181	0.00204	0.1087	1.47223	0.2	-0.00068	0.00209	0.00086	0.00086	0.00086	0.558003	0.558003
g__Domibacillus	0.00168	0.00121	0.00254	0.0014	0.06715	0.6619	0.1492	-0.00191	0.00015	-0.00086	-0.00086	0.00086	-0.595315	0.595315
g__Thermosediminibacter	0.0018	0.00096	0.00094	0.00082	0.02028	1.92696	0.05938	0.00024	0.00146	0.00087	0.00086	0.00086	0.946327	0.946327
g__unclassified_f__Chroococcidiopsidaceae	3e-05	5e-05	0.00089	0.00086	2e-05	0.02871	0.00119	-0.00141	-0.00036	-0.00086	-0.00086	0.00086	-5.1223	5.1223
g__Desulfurivibrio	0.00088	0.00221	2e-05	5e-05	7e-05	43.7584	0.00163	0.00034	0.0018	0.00086	0.00086	0.00086	5.45149	5.45149
g__Eudoraea	0.00089	0.0007	3e-05	8e-05	3e-05	32.1851	0.00144	0.00061	0.00113	0.00086	0.00086	0.00086	5.00832	5.00832
g__Haloplasma	0.00278	0.00157	0.00192	0.00131	0.136	1.44815	0.2363	-0.00026	0.00181	0.00086	0.00086	0.00086	0.534211	0.534211
g__Candidatus_Gallitreponema	0.00111	0.00235	0.00197	0.00398	0.6919	0.56135	0.771	-0.00373	0.0013	-0.00086	-0.00086	0.00086	-0.833028	0.833028
g__Flavitalea	0.00212	0.00805	0.00126	0.00089	0.03297	1.67244	0.08592	-0.00116	0.00433	0.00085	0.00086	0.00086	0.741954	0.741954
g__Cypionkella	0.00019	0.0003	0.00105	0.00245	0.5552	0.18423	0.682	-0.00257	0.00014	-0.00086	-0.00086	0.00086	-2.44042	2.44042
g__Billgrantia	0.00158	0.00147	0.00073	0.00083	0.07925	2.15963	0.1677	0.00017	0.00162	0.00085	0.00085	0.00085	1.11078	1.11078
g__Candidatus_Equihabitans	0.00143	0.00227	0.00058	0.00027	0.9849	2.47746	0.9931	0.00011	0.00189	0.00085	0.00085	0.00085	1.30886	1.30886
g__Fertoeibacter	0.00011	0.00025	0.00096	0.00234	0.1133	0.11243	0.2075	-0.0025	7e-05	-0.00086	-0.00085	0.00085	-3.1529	3.1529
g__Shouchella	0.00162	0.00133	0.00077	0.00038	0.01833	2.11429	0.05526	0.00035	0.0014	0.00085	0.00085	0.00085	1.08017	1.08017
g__Lascolabacillus	0.00098	0.001	0.00013	0.00021	0.00432	7.4707	0.01926	0.00046	0.00127	0.00085	0.00085	0.00085	2.90124	2.90124
g__Yamadazyma	0.0009	0.0045	5e-05	7e-05	0.02694	16.48	0.07359	-8e-05	0.00264	0.00084	0.00085	0.00085	4.04264	4.04264
g__Kocuria	0.0003	0.00062	0.00114	0.00156	0.00342	0.25936	0.01618	-0.00205	-3e-05	-0.00085	-0.00084	0.00084	-1.94697	1.94697
g__Limnochorda	0.00145	0.00166	0.00061	0.00046	0.09305	2.39335	0.1905	0.00022	0.00157	0.00084	0.00084	0.00084	1.25903	1.25903
g__Zobellia	0.00079	0.00097	0.00163	0.00185	0.136	0.48296	0.2363	-0.0022	0.00015	-0.00084	-0.00084	0.00084	-1.05002	1.05002
g__Pilimelia	0.00106	0.00397	0.00189	0.00265	0.05852	0.56184	0.1337	-0.00295	0.00155	-0.00083	-0.00083	0.00083	-0.831769	0.831769
g__Methanocella	0.00101	0.00145	0.00018	0.00035	0.00683	5.6271	0.02759	0.00028	0.00146	0.00083	0.00083	0.00083	2.49239	2.49239
g__Candidatus_Microthrix	0.00127	0.00216	0.00044	0.00052	0.206	2.90443	0.329	2e-05	0.00182	0.00083	0.00083	0.00083	1.53826	1.53826
g__Abiotrophia	0.00033	0.00028	0.00116	0.0009	0.00658	0.28349	0.02664	-0.00143	-0.00029	-0.00083	-0.00083	0.00083	-1.81863	1.81863
g__Polyangium	0.00115	0.0041	0.00032	0.00029	0.7771	3.59216	0.8343	-0.00015	0.00258	0.00083	0.00083	0.00083	1.84485	1.84485
g__unclassified_f__Porphyromonadaceae	0.00122	0.00129	0.00039	0.00057	0.01833	3.10745	0.05526	0.00023	0.00149	0.00083	0.00083	0.00083	1.63573	1.63573
g__Asterophora	0	0	0.00083	0.00217	0.00277	0	0.01418	-0.00237	0	-0.00083	-0.00083	0.00083	#NUM!	#NUM!
g__Siadenovirus	0.00083	0.00327	0	0	0.02469	0	0.0684	8e-05	0.00226	0.00083	0.00083	0.00083	#NUM!	#NUM!
g__Lahndsivirus	0.00083	0.00139	0	0	0.00025	0	0.00312	0.00039	0.00142	0.00083	0.00083	0.00083	#NUM!	#NUM!
g__Verrucomicrobium	5e-05	5e-05	0.00088	0.0016	0.03931	0.05463	0.09878	-0.00202	-9e-05	-0.00083	-0.00083	0.00083	-4.19416	4.19416
g__Thiospirochaeta	0.00092	0.00187	9e-05	0.00021	0.00063	10.2614	0.00547	0.00027	0.00168	0.00083	0.00083	0.00083	3.35915	3.35915
g__Methylibium	0.00079	0.00076	0.00162	0.00226	0.485	0.48863	0.609	-0.00251	0.00036	-0.00083	-0.00083	0.00083	-1.03319	1.03319
g__Conidiobolus	0.00127	0.00626	0.00045	0.00104	0.01714	2.82959	0.05257	-0.00085	0.00367	0.00082	0.00082	0.00082	1.50059	1.50059
g__Methanothrix	0.00217	0.00178	0.00135	0.00121	0.1173	1.60905	0.2127	-0.00021	0.00181	0.00082	0.00082	0.00082	0.686209	0.686209
g__Azotobacter	0.0019	0.00318	0.00108	0.00161	0.3751	1.76245	0.5166	-0.00071	0.00252	0.00082	0.00082	0.00082	0.817582	0.817582
g__Microbispora	0.00059	0.0012	0.00141	0.00169	0.05193	0.42072	0.1211	-0.00205	0.00019	-0.00082	-0.00082	0.00082	-1.24907	1.24907
g__Quinella	0.00138	0.00111	0.00056	0.00044	0.04153	2.45318	0.1031	0.00033	0.00135	0.00082	0.00082	0.00082	1.29465	1.29465
g__Candidatus_Caccovivens	0.00126	0.00114	0.00044	0.00061	0.02024	2.85388	0.05938	0.00023	0.00139	0.00082	0.00082	0.00082	1.51292	1.51292
g__Pseudobdellovibrio	0.00023	0.0004	0.00105	0.00253	0.7419	0.21921	0.8109	-0.00263	0.00022	-0.00082	-0.00082	0.00082	-2.18961	2.18961
g__unclassified_f__Candidatus_Nanogingivalaceae	0.00085	0.00135	3e-05	5e-05	0.01719	29.2961	0.05264	0.00038	0.00141	0.00082	0.00082	0.00082	4.87263	4.87263
g__Amphiamblys	0.00082	0.00412	0	0	0.4253	0	0.5493	0	0.00245	0.00082	0.00082	0.00082	#NUM!	#NUM!
g__Thalassovita	0.00088	0.00179	6e-05	9e-05	0.00845	15.2796	0.03218	0.00024	0.00164	0.00083	0.00082	0.00082	3.93353	3.93353
g__Celeribacter	0.00089	0.00169	7e-05	0.00011	0.00059	11.9475	0.00522	0.0003	0.0015	0.00081	0.00082	0.00082	3.57864	3.57864
g__Aureibaculum	0.00091	0.00123	9e-05	0.0002	0.0003	10.3191	0.00359	0.00038	0.00138	0.00082	0.00082	0.00082	3.36725	3.36725
g__Vicingus	0.00136	0.00194	0.00055	0.00094	0.09295	2.48414	0.1905	-0.0001	0.00181	0.00081	0.00081	0.00081	1.31275	1.31275
g__Rubellicoccus	0.00054	0.0008	0.00135	0.00151	0.05423	0.40176	0.1262	-0.00194	5e-05	-0.00081	-0.00081	0.00081	-1.31559	1.31559
g__Natronosporangium	0.00028	0.00112	0.00109	0.00176	0.00892	0.25681	0.03344	-0.00218	0.00017	-0.00081	-0.00081	0.00081	-1.96123	1.96123
g__Longimycelium	0.00118	0.00192	0.00037	0.00059	0.08754	3.17783	0.1818	8e-05	0.00166	0.00081	0.00081	0.00081	1.66804	1.66804
g__Woeseia	0.00097	0.00445	0.00016	0.00044	0.09763	6.10045	0.1908	-0.00024	0.00272	0.00081	0.00081	0.00081	2.60892	2.60892
g__Vitrella	3e-05	0.00015	0.00084	0.00163	1e-05	0.03766	0.0009	-0.00195	-9e-05	-0.00081	-0.00081	0.00081	-4.73082	4.73082
g__Haoranjiania	0.00084	0.00086	3e-05	8e-05	4e-05	32.8284	0.00144	0.00048	0.00116	0.00082	0.00081	0.00081	5.03687	5.03687
g__Metabacillus	0.01299	0.00907	0.0138	0.00552	0.4617	0.9413	0.5864	-0.00566	0.00408	-0.00081	-0.00081	0.00081	-0.0872735	0.0872735
g__Candidatus_Faeciplasma	0.00491	0.00467	0.0041	0.00172	0.8651	1.19749	0.9028	-0.00109	0.00271	0.00081	0.00081	0.00081	0.260014	0.260014
g__Methanimicrococcus	0.00515	0.00417	0.00596	0.00337	0.3958	0.86449	0.5391	-0.00344	0.00186	-0.00081	-0.00081	0.00081	-0.210079	0.210079
g__Mahella	0.01098	0.00566	0.01017	0.00457	0.7199	1.07952	0.7948	-0.00278	0.00437	0.00081	0.00081	0.00081	0.11039	0.11039
g__Yeguia	0.00864	0.00552	0.00945	0.00401	0.5334	0.91416	0.6582	-0.00397	0.00252	-0.00081	-0.00081	0.00081	-0.129481	0.129481
g__Rhodanobacter	0.00327	0.0023	0.00246	0.00473	0.02725	1.33162	0.07381	-0.00273	0.00315	0.00081	0.00081	0.00081	0.413182	0.413182
g__Salegentibacter	0.00147	0.00207	0.00066	0.00087	0.2271	2.22031	0.3568	-0.00012	0.00179	0.00081	0.00081	0.00081	1.15076	1.15076
g__Methylocaldum	0.00036	0.00034	0.00117	0.00153	0.1683	0.30614	0.282	-0.00176	4e-05	-0.00081	-0.00081	0.00081	-1.70774	1.70774
g__Pseudoponticoccus	0.00081	0.00125	2.50406e-06	1e-05	0.00012	325.304	0.00214	0.00039	0.00135	0.00081	0.000807496	0.000807496	8.34565	8.34565
g__Enterovirga	0.00105	0.00187	0.00185	0.00351	0.6643	0.56776	0.7467	-0.00337	0.00093	-0.0008	-0.0008	0.0008	-0.816647	0.816647
g__unclassified_p__Candidatus_Daviesbacteria	0.00141	0.0019	0.00061	0.00077	0.08941	2.31141	0.1852	3e-05	0.00172	0.0008	0.0008	0.0008	1.20877	1.20877
g__Acidiferrimicrobium	0.00166	0.00436	0.00086	0.00121	0.5584	1.91602	0.6824	-0.0007	0.00278	0.00079	0.0008	0.0008	0.938113	0.938113
g__unclassified_f__Hapalosiphonaceae	0.00095	0.00155	0.00015	0.00043	0.01978	6.29272	0.05888	0.00023	0.00152	0.0008	0.0008	0.0008	2.65368	2.65368
g__Azohydromonas	0.00092	0.00199	0.00012	0.00015	0.0993	7.71865	0.1908	0.0002	0.00169	0.0008	0.0008	0.0008	2.94835	2.94835
g__Lastavirus	0.0008	0.0041	0	0	0.601	0	0.6902	0	0.00241	0.0008	0.0008	0.0008	#NUM!	#NUM!
g__Slopekvirus	0.0008	0.00115	0	0	7e-05	0	0.00163	0.00039	0.00128	0.0008	0.0008	0.0008	#NUM!	#NUM!
g__Candidatus_Brachybacter	0.00012	0.00047	0.00092	0.0018	0.01524	0.12582	0.05074	-0.00205	1e-05	-0.00081	-0.0008	0.0008	-2.99057	2.99057
g__Aliikangiella	0.00083	0.00202	3e-05	5e-05	0.00318	30.4819	0.01553	0.00019	0.00169	0.0008	0.0008	0.0008	4.92988	4.92988
g__Phelipanche	0	0	0.0008	0.00158	1e-05	0	0.00092	-0.00188	-0.00012	-0.0008	-0.0008	0.0008	#NUM!	#NUM!
g__Litoribacterium	8e-05	0.00017	0.00088	0.00062	0.00037	0.09171	0.00409	-0.00117	-0.00042	-0.0008	-0.0008	0.0008	-3.44678	3.44678
g__unclassified_f__Phaeosphaeriaceae	0	0	0.0008	0.0023	6e-05	0	0.00163	-0.00235	-1e-05	-0.0008	-0.0008	0.0008	#NUM!	#NUM!
g__unclassified_p__Candidatus_Auribacterota	0.00291	0.00256	0.00211	0.00169	0.5842	1.37924	0.6902	-0.00064	0.00229	0.0008	0.0008	0.0008	0.463874	0.463874
g__unclassified_o__Methanosarcinales	0.00226	0.00264	0.00146	0.00155	0.157	1.54914	0.2656	-0.00053	0.00217	0.0008	0.0008	0.0008	0.631468	0.631468
g__Nitrosophilus	0.00018	0.00037	0.00098	0.00183	0.2213	0.17831	0.3489	-0.00209	-1.093e-06	-0.00081	-0.0008	0.0008	-2.48754	2.48754
g__Sideroxyarcus	0.00026	0.00057	0.00106	0.0014	0.00263	0.24715	0.01418	-0.00185	-7e-05	-0.0008	-0.0008	0.0008	-2.01654	2.01654
g__Gallibacterium	0.00081	0.00211	1e-05	4e-05	0.00053	57.0485	0.00483	0.00025	0.00171	0.0008	0.0008	0.0008	5.83412	5.83412
g__Vineibacter	0.00135	0.00179	0.00056	0.00069	0.157	2.40812	0.2656	3e-05	0.00162	0.00079	0.00079	0.00079	1.26791	1.26791
g__Luteibacter	0.00108	0.00128	0.00029	0.0003	0.04545	3.66544	0.111	0.00032	0.00129	0.00078	0.00079	0.00079	1.87399	1.87399
g__Kamptonema	0.00012	0.00026	0.00091	0.00112	0.00998	0.13361	0.03668	-0.00165	-0.00016	-0.00079	-0.00079	0.00079	-2.9039	2.9039
g__Magnetofaba	0.0009	0.00375	0.00011	0.00022	0.0303	8.18071	0.08062	-8e-05	0.0024	0.00079	0.00079	0.00079	3.03223	3.03223
g__Caecibacter	0.00083	0.0007	4e-05	0.0001	0.0001	20.3258	0.002	0.00052	0.00108	0.00079	0.00079	0.00079	4.34524	4.34524
g__Desulfomonile	0.00214	0.00171	0.00135	0.00112	0.1929	1.5882	0.3114	-0.00016	0.00172	0.00079	0.00079	0.00079	0.667393	0.667393
g__Actibacterium	0.00085	0.00128	6e-05	0.00017	0.00022	13.2601	0.0031	0.00039	0.00135	0.00079	0.00079	0.00079	3.72902	3.72902
g__Limihaloglobus	0.00066	0.00109	0.00144	0.0013	0.0516	0.4571	0.1211	-0.0017	0.00013	-0.00078	-0.00078	0.00078	-1.12942	1.12942
g__Candidatus_Nitrosotalea	0.00063	0.00105	0.00141	0.00207	0.02724	0.44414	0.07381	-0.00229	0.00028	-0.00079	-0.00078	0.00078	-1.17091	1.17091
g__Thermochromatium	0.00083	0.00128	5e-05	8e-05	0.01222	16.3147	0.04257	0.00036	0.00134	0.00078	0.00078	0.00078	4.0281	4.0281
g__Pseudoxanthomonas	0.00067	0.00072	0.00145	0.00145	0.1173	0.46399	0.2127	-0.0017	0.00012	-0.00077	-0.00078	0.00078	-1.10783	1.10783
g__Gulbenkiania	0.00114	0.00185	0.00036	0.00051	0.894	3.15556	0.9258	8e-05	0.00163	0.00078	0.00078	0.00078	1.6579	1.6579
g__Natronobacillus	0.00027	0.00031	0.00105	0.00084	0.00824	0.2594	0.03152	-0.00134	-0.00029	-0.00078	-0.00078	0.00078	-1.94675	1.94675
g__Kribbibacterium	0.00015	0.00031	0.00092	0.00107	0.0088	0.15996	0.03304	-0.00155	-0.00022	-0.00078	-0.00077	0.00077	-2.64422	2.64422
g__Methylophaga	0.00069	0.00041	0.00146	0.00043	0.00031	0.47381	0.00368	-0.0011	-0.00045	-0.00077	-0.00077	0.00077	-1.07762	1.07762
g__Pseudogulbenkiania	0.00029	0.00042	0.00106	0.00251	0.7482	0.27296	0.8117	-0.00246	0.00024	-0.00077	-0.00077	0.00077	-1.87324	1.87324
g__Pseudoflavitalea	0.00077	0.00147	0	0	7e-05	0	0.00163	0.00032	0.00139	0.00077	0.00077	0.00077	#NUM!	#NUM!
g__Candidatus_Defluviibacterium	0.00077	0.00159	0	0	0.00025	0	0.00312	0.00026	0.00141	0.00077	0.00077	0.00077	#NUM!	#NUM!
g__Curvularia	1e-05	3e-05	0.00078	0.00199	0.00375	0.01086	0.01732	-0.00213	-3e-05	-0.00077	-0.00077	0.00077	-6.52483	6.52483
[truncated: 4,112 more rows]
