# Supplementary material
Source: Research Square preprint supplement (doi:10.21203/rs.3.rs-9409886/v1)
Supplement: Supplementary file 9 [file d4392447c4811abbff47c923.xlsx]

## Sheet: Sheet1
KEGG_Level3	Genus	FC_Mean_rpkm	FC_Mean_Precentage	ZLW_Mean_rpkm		G5	GQ_1	G3	GQ_15	G8	GQ_2	GQ_8	G10	H4	GQ_4	H7	GQ_9	G9	GQ_14	H6	GQ_5	G2	G1	H10	H8	H3	H5	GQ_11	H1	H2	G6	H9	G7	G4	GQ_10	c_y_zlw_1	c_y_zlw_5	c_y_zlw_9	c_y_zlw_6	c_y_zlw_3	c_y_zlw_8	c_y_zlw_10	c_y_zlw_7	c_y_zlw_4
Aminoacyl-tRNA biosynthesis	g__Akkermansia	24.385	0.202251	107.065	0.967176	0.787942	0	0	0.109265	0	0.218785	0	3.10081	32.2762	0	0	0	0	0	5.82019	1.78032	0	7.47653	0.233467	0.180804	57.0634	0.47889	0.0629635	82.6131	538.548	0	0.664337	0	0	0.134869	0.437287	13.9831	245.761	31.5811	8.39654	9.80731	31.192	16.3305	606.097
Aminoacyl-tRNA biosynthesis	g__Alistipes	165.608	1.37356	6.98167	0.0630692	48.8856	10.7416	0	103.95	0	745.818	181.443	297.539	56.4383	7.68219	16.1735	123.557	4.33802	70.8869	404.242	216.058	3.80383	335.021	33.3903	28.8661	35.7612	281.627	16.953	696.397	108.574	116.411	337.818	144.253	408.013	133.597	0.874958	1.87566	0.659173	2.33908	5.71133	0.423458	2.23614	18.9969	29.7184
Aminoacyl-tRNA biosynthesis	g__Amedibacillus	151.559	1.25704	145.921	1.31818	265.272	7.5028	579.243	3.75348	11.884	65.1793	159.008	126.643	100.855	315.114	9.00654	251.973	290.802	394.96	4.39791	93.3562	0	456.679	255.16	107.048	35.7078	36.9734	115.832	12.6766	61.4056	223.647	68.3216	81.9758	296.085	116.311	35.3084	629.668	24.0585	228.916	5.19626	74.8712	70.6834	229.719	14.868
Aminoacyl-tRNA biosynthesis	g__Amedibacterium	241.312	2.00146	145.425	1.3137	549.02	13.145	1236.9	1.81562	27.572	137.677	97.2749	218.26	163.567	531.781	6.95163	181.131	618.539	458.016	4.08256	191.872	2.39848	867.383	510.108	210.448	9.39269	61.062	225.227	13.6569	108.961	420.988	132.119	33.6786	147.903	58.4363	97.5813	396.59	113.67	245.655	14.1315	122.99	128.683	122.714	66.8111
Aminoacyl-tRNA biosynthesis	g__Anaerorhabdus	436.929	3.62391	502.666	4.54085	162.411	5.65672	0	1893.27	0	219.322	1899.73	272.515	605.589	1572.67	841.263	861.467	114.508	211.375	21.9301	28.9007	10.3051	128.684	75.1053	105.036	332.472	72.5919	129.999	133.846	366.138	565.211	33.376	1330.88	939.571	174.059	25.9765	94.4659	1934.71	1092.95	1.33481	406.047	863.011	48.3526	57.1456
Aminoacyl-tRNA biosynthesis	g__Anaerotruncus	78.004	0.646969	152.837	1.38066	46.505	3.7092	0	75.1002	0	92.4329	24.8482	143.783	41.6042	7.27679	10.911	71.4681	24.043	45.0857	211.625	14.1463	2.79662	11.1388	312.792	55.5965	172.018	218.162	14.6411	87.7185	45.7583	5.50435	213.205	60.0603	112.185	216.004	33.0892	157.129	106.196	84.6486	248.146	259.96	207.939	168.252	110.176
Aminoacyl-tRNA biosynthesis	g__Angelakisella	42.2973	0.350816	128.37	1.15964	50.841	2.84027	0	17.5803	0	57.9757	29.9937	137.064	14.9896	3.89236	20.0088	20.3807	16.8604	69.0809	116.547	2.05853	1.58755	16.4561	77.004	21.6701	36.1757	77.0039	4.82585	90.1802	10.2811	13.1051	93.2455	74.1479	142.831	50.2917	15.6873	208.982	11.5687	126.859	191.678	68.8923	325.268	156.298	50.0989
Aminoacyl-tRNA biosynthesis	g__Bacteroides	140.187	1.16272	58.3217	0.526851	46.947	1.82852	13.2175	425.011	0	361.697	466.194	234.855	20.6862	5.73467	37.5995	38.507	0.246278	35.8792	82.4378	629.698	5.45046	197.195	7.9462	42.6673	30.3928	79.4004	5.31619	514.026	60.0692	77.2745	41.7237	403.749	39.6036	300.268	0.526725	9.20585	12.5097	125.726	5.38632	42.8634	9.60497	146.881	172.191
Aminoacyl-tRNA biosynthesis	g__Beduini	64.0168	0.530959	38.0917	0.344103	139.4	48.3346	326.733	0.312997	3.88613	39.849	27.6901	53.6286	34.0289	136.722	0.595641	56.9239	158.315	138.433	0.219522	50.0173	0.766839	200.919	130.764	37.0574	3.36628	14.815	58.3941	3.51462	23.243	111.824	30.556	9.96075	60.6308	19.6029	12.0032	96.9015	61.4511	46.4392	1.13316	55.7083	32.1889	23.5661	13.4335
Aminoacyl-tRNA biosynthesis	g__Bilophila	186.868	1.54989	219.244	1.98055	101.368	1.68453	0	231.178	0	351.42	82.5701	145.569	766.082	3.10789	2.87507	83.5477	93.4596	14.2347	554.251	232.263	1.06423	56.2121	104.299	330.2	398.046	512.747	19.4872	256.986	158.983	49.6822	427.765	117.154	287.931	221.865	83.0367	217.033	305.492	100.932	292.301	319.528	119.719	159.983	375.172
Aminoacyl-tRNA biosynthesis	g__Bradyrhizobium	127.218	1.05516	18.1518	0.163975	10.3388	123.928	614.83	0	168.689	0.418802	1.11459	2.53728	5.99833	3.21222	151.695	1.32264	35.2472	16.934	3.12054	4.32746	2619.8	24.9939	2.41217	5.70213	0.989258	2.00716	0.519144	0.221335	3.93066	4.04672	0.433553	1.77048	4.86304	1.14189	1.17609	0	85.7322	9.20997	1.0908	6.61565	7.69041	47.457	4.39395
Aminoacyl-tRNA biosynthesis	g__Breznakia	817.584	6.78108	25.4943	0.230303	1869.26	47.0485	4316.18	2.7477	55.7859	443.467	364.941	741.035	407.015	1870.86	8.41237	767.586	1954.64	1904.38	4.64305	622.209	1.61933	2693.02	1598.17	563.41	24.5627	179.467	759.028	31.3264	332.869	1400.28	389.29	133.012	778.685	262.555	72.3109	1.77258	53.3604	0	3.87009	7.71363	55.3099	1.23883	33.8719
Aminoacyl-tRNA biosynthesis	g__Candidatus_Avidesulfovibrio	220.957	1.83263	153.788	1.38925	117.746	0	0	306.46	1.04226	173.218	101.452	169.609	1182.07	3.8874	1.8447	86.2036	96.4804	7.67889	657.776	357.79	8.02382	61.2805	27.6534	389.672	476.955	756.881	19.4168	165.527	177.524	76.9092	472.73	118.932	410.534	203.428	27.2773	170.207	412.454	201.709	16.5604	7.77659	177.392	33.8955	336.819
Aminoacyl-tRNA biosynthesis	g__Candidatus_Faecisoma	94.5771	0.784428	8.40602	0.0759361	84.5812	0	0	503.601	0.568619	171.041	54.367	317.337	157.279	57.0461	8.13748	106.923	27.468	80.1232	21.2887	268.215	1.50766	27.5507	1.86712	35.1936	87.2215	68.6234	76.16	39.7776	81.7958	0.482487	14.8936	375.732	11.4867	157.043	0	2.27455	0.796516	41.961	0.0880401	1.61501	8.3393	2.87255	17.7072
Aminoacyl-tRNA biosynthesis	g__Candidatus_Fimihabitans	104.664	0.868089	11.5514	0.10435	153.213	0	0	943.328	0	252.334	76.3041	171.58	140.217	43.8209	0	76.2135	12.9469	53.9779	16.1893	247.993	0.48941	50.7537	0.375742	11.924	65.1731	41.2712	97.5918	49.0541	59.8213	0.858587	5.58855	384.374	7.80983	176.719	0	1.16224	0	51.4709	1.40925	0	21.3426	0	28.5773
Aminoacyl-tRNA biosynthesis	g__Candidatus_Methanobinarius	93.4938	0.775442	79.8469	0.7213	0	0	0	0	0	0	0	0	0	0	0	0	0	0	0	0	0	0	2804.81	0	0	0	0	0	0	0	0	0	0	0	522.358	42.2391	0	0	0	0	31.077	22.0375	100.91
Aminoacyl-tRNA biosynthesis	g__Christensenella	240.117	1.99154	79.0915	0.714476	57.3438	1.56126	0	29.6856	0	97.3456	104.988	232.514	577.503	15.4193	12.0156	58.8423	68.0811	77.0256	208.421	19.8404	0	43.6313	139.384	1681.25	1122.34	992.061	106.815	65.1926	317.367	18.9463	480.565	197.978	71.4587	405.938	39.5557	9.57267	144.546	118.456	14.1053	166.739	57.2422	23.1577	138.449
Aminoacyl-tRNA biosynthesis	g__Clostridium	944.809	7.8363	594.6	5.37135	1451.49	611.034	280.367	1842.81	11.0783	891.144	1238.35	1956.54	1349.83	696.14	304.203	1460.35	2229.74	991.833	603.801	748.457	95.6881	822.098	329.128	994.07	1719.84	988.725	536.725	767.92	1029.48	128.693	393.777	1681.66	822.148	1367.16	93.4837	644.379	453.604	827.062	638.325	602.751	1114.63	485.872	491.293
Aminoacyl-tRNA biosynthesis	g__Copranaerobaculum	80.4897	0.667586	61.6332	0.556766	159.658	5.65941	406.96	2.4835	8.96622	43.0908	103.522	79.5245	88.4013	169.466	3.59345	73.0513	180.063	111.45	1.01474	62.7399	0	262.01	147.291	74.6161	23.4068	19.2974	68.9355	2.24482	44.6444	137.116	32.5478	20.0252	68.9542	13.9589	21.7642	135.806	24.0165	24.8662	3.88753	195.282	137.295	1.03152	10.75
Aminoacyl-tRNA biosynthesis	g__Coprobacillus	76.8654	0.637525	63.3076	0.571892	17.1961	0	0	127.545	0	73.3348	347.057	28.2655	40.6269	434.245	2.79061	320.423	2.20737	107.398	7.46431	308.114	0	25.8211	1.88281	18.916	11.4473	7.58078	9.79059	7.81979	19.4796	26.4104	3.68338	117.364	107.67	131.428	7.68997	81.0965	102.694	118.376	15.6585	42.57	125.578	43.0075	33.0984
Aminoacyl-tRNA biosynthesis	g__Desulfovibrio	210.509	1.74597	260.759	2.35558	139.894	3.6392	0	116.642	0	1460.53	74.5895	204.393	171.873	1.21057	2.81402	62.7384	180.009	27.6774	966.774	121.937	0	69.9681	368.933	222.271	354.764	133.189	12.8246	332.868	93.8694	31.0693	484.015	167.188	262.876	246.706	223.209	271.597	81.7469	27.9952	111.567	208.853	31.5134	930.694	459.656
Aminoacyl-tRNA biosynthesis	g__Eubacterium	25.677	0.212966	112.229	1.01382	34.9994	9.02638	0	55.622	3.11937	33.9224	10.8768	20.986	32.5006	8.32019	3.14953	14.7859	6.61287	18.2784	26.2374	22.4132	4.26834	18.2876	11.5958	9.29346	19.2685	21.2864	6.04	40.2859	151.335	2.14286	28.6775	31.1473	15.1801	110.65	21.0704	185.169	28.4076	158.859	162.959	148.356	100.847	159.898	44.4925
Aminoacyl-tRNA biosynthesis	g__Faecalicatena	32.4389	0.26905	126.309	1.14102	24.9021	0	0	10.9538	0	7.68581	30.1691	102.966	19.0721	31.8444	32.4004	30.5634	9.70088	15.8084	9.81444	0.911002	2.3482	2.11318	20.5858	28.2684	51.2663	10.719	6.67071	36.6617	46.9393	14.5002	19.2011	204.733	45.55	156.819	49.6814	67.2688	105.43	178.735	344.295	183.257	89.8806	76.2132	42.0232
Aminoacyl-tRNA biosynthesis	g__Hungatella	7.91894	0.0656801	119.8	1.08222	8.60057	1.17861	0	13.5675	0	2.6881	1.41942	8.28816	5.39896	6.08622	0	11.5158	6.41716	3.45553	9.99753	17.444	0.982574	0.614442	5.25542	7.0491	8.01009	22.2913	2.30802	11.7776	8.8673	0.314974	3.30806	10.8026	10.3332	49.596	15.7687	38.2124	134.022	239.752	181.597	131.344	262.633	31.7456	43.123
Aminoacyl-tRNA biosynthesis	g__Hydrogenoanaerobacterium	35.9957	0.29855	162.633	1.46915	40.3105	3.92878	0	56.8654	0	67.4191	33.6304	80.7493	21.3583	13.507	11.8128	35.9866	21.5145	42.3524	63.5764	10.0434	4.00225	9.47735	45.0956	32.5469	54.858	72.4884	10.2411	57.8757	41.2356	5.95732	59.4756	57.0176	69.4843	57.0597	30.2175	91.6007	368.079	179.578	72.1001	291.549	189.401	77.297	163.874
Aminoacyl-tRNA biosynthesis	g__Hyphomicrobium	114.711	0.95142	1.67697	0.015149	3.35043	726.282	40.5292	3.05809	1259.92	2.80953	9.51942	6.25341	12.2419	32.3488	389.078	32.7535	116.215	24.99	12.4934	12.0059	619.585	53.5118	2.92575	13.0695	5.38537	6.50396	1.54217	0.402829	12.567	18.386	0.376438	11.1855	9.51646	2.5294	0.188301	0	7.87909	1.20753	0	1.21928	0.688958	3.22185	0.687723
Aminoacyl-tRNA biosynthesis	g__Intestinimonas	21.2389	0.176157	87.0612	0.786471	22.2402	0	0	33.3212	0	32.2727	63.2505	30.1918	18.4011	2.16949	2.22985	46.0568	3.29869	3.6622	25.4436	15.3622	0	22.0096	10.9143	15.6174	39.5378	77.5477	1.98624	25.1775	33.6796	4.90268	27.4946	21.3335	38.0817	20.9841	3.69334	101.518	34.6217	52.5541	179.853	48.3532	84.5555	103.206	175.196
Aminoacyl-tRNA biosynthesis	g__Kineothrix	26.5893	0.220533	267.215	2.4139	24.5652	0	0	40.8773	0	6.64517	1.9499	41.6975	7.45152	21.9534	2.54356	12.5538	2.07322	15.0108	112.818	33.0173	0	0.25383	101.721	11.4565	21.762	46.4544	6.13031	35.6568	52.2626	0	77.34	35.3302	4.10857	82.0448	97.4655	201.582	32.9891	59.5507	773.121	480.573	98.3043	218.685	442.663
Aminoacyl-tRNA biosynthesis	g__Lachnoclostridium	20.899	0.173338	205.929	1.86027	19.7723	0.292874	0	33.7555	0.233112	12.8213	13.3804	36.9218	27.4935	20.9369	49.0611	48.1601	7.77229	3.70904	34.1494	16.493	3.08	1.48946	6.69243	15.7702	21.4222	30.2989	5.45498	20.9202	31.7161	1.86269	11.3893	42.8271	12.2196	96.8754	40.1353	60.1402	205.567	327.563	362.693	161.211	294.495	181.665	219.894
Aminoacyl-tRNA biosynthesis	g__Longibaculum	83.9535	0.696315	31.9802	0.288894	125.082	3.71429	325.849	61.2445	5.04391	58.8379	176.099	65.0521	32.7446	328.064	3.56806	160.513	140.075	136.033	0.466293	188.195	0	196.653	109.856	43.1581	0.478021	8.11462	48.1911	5.60666	26.1666	105.106	23.3346	45.9121	41.4536	53.9937	3.7193	44.7595	2.58841	99.6716	1.99522	26.2059	64.4457	17.123	27.3132
Aminoacyl-tRNA biosynthesis	g__Longicatena	79.749	0.661442	59.9415	0.541483	175.467	4.98742	454.717	0.245035	7.90159	40.2541	33.9336	65.641	38.6573	180.981	5.71594	71.742	201.106	180.236	0.924085	61.3742	0	245.298	146.684	81.5508	1.18423	13.273	68.5366	2.44139	27.2215	134.965	37.1197	14.3624	70.4302	25.519	28.5117	165.614	61.7374	64.7141	3.66843	34.1457	49.6756	99.068	32.338
Aminoacyl-tRNA biosynthesis	g__Mailhella	83.8806	0.69571	53.77	0.485734	42.8175	0	0	81.0618	0	179.769	32.5585	51.7164	68.1908	2.94204	0.644409	51.807	68.5235	20.8152	253.696	241.639	0.962874	30.5696	95.2583	213.662	219.609	123.793	28.5034	115.926	33.7013	1.8489	308.321	35.5949	74.4411	138.046	24.7693	43.6294	5.74903	10.0384	6.66482	26.3318	51.5566	25.1628	290.028
Aminoacyl-tRNA biosynthesis	g__Merdibacter	140.183	1.16268	10.8704	0.0981982	323.686	7.3866	735.891	0.517023	8.67036	75.0656	62.8525	120.145	76.2459	317.131	2.94615	126.038	321.564	312.5	0.994793	111.806	0	453.02	286.761	110.853	5.17024	30.0242	130.295	7.60828	60.3645	241.274	64.6398	28.0899	136.591	47.3496	20.544	6.19153	11.6318	1.54564	2.88007	15.5153	20.1954	0.590859	18.739
Aminoacyl-tRNA biosynthesis	g__Methanobrevibacter	11.1989	0.0928844	930.64	8.40698	0	0	0	0	0	0	0	0	0	0	0	0	0	0	0	0	0	0	335.967	0	0	0	0	0	0	0	0	0	0	0	6445.7	1164.24	0	0.0784794	0	0	77.8095	668.644	19.2897
Aminoacyl-tRNA biosynthesis	g__Methyloceanibacter	230.863	1.91479	4.94663	0.0446856	11.8545	2386.79	45.0269	10.9135	1784.64	0.974394	18.8594	24.1318	35.6608	50.2706	1102.47	24.8753	99.3735	25.5233	16.2595	26.0359	1055.19	56.965	7.76558	30.527	6.48556	18.7743	1.06119	0.163089	29.8069	26.1547	1.72127	14.3381	10.7179	2.57014	0.270202	0	29.4321	2.19698	0.682717	1.69788	2.54404	6.073	1.62271
Aminoacyl-tRNA biosynthesis	g__Mucinivorans	85.3018	0.707497	23.8473	0.215425	21.1212	1.36173	0	38.4725	0	243.219	102.792	139.214	41.8178	2.24025	13.353	77.583	3.04057	17.5848	383.553	79.8873	0	220.082	9.59435	27.7989	29.8863	206.842	7.15221	347.442	70.2213	38.2187	246.677	53.2517	104.747	31.8983	0.0417725	0.149375	0.213491	0.31004	0.343498	0	1.65734	2.15779	209.752
Aminoacyl-tRNA biosynthesis	g__Mucispirillum	31.993	0.265351	146.421	1.3227	11.6382	0	0	3.93514	0	62.2358	3.25358	85.803	0	2.34476	0	15.293	17.6423	78.6203	0	17.0696	0	28.1779	264.883	0	0.440487	91.6402	10.6899	62.3744	71.7125	33.7646	26.1067	9.69397	47.1301	15.3393	85.2455	24.5056	0	7.90586	55.57	0.653785	2.55616	1139.72	1.63231
Aminoacyl-tRNA biosynthesis	g__Mycobacterium	135.375	1.12281	4.73375	0.0427625	10.5753	1322.56	198.43	1.72821	919.659	0	31.6599	23.5627	49.7418	53.5062	503.688	34.4321	156.524	6.92565	36.6759	29.9558	366.086	159.087	6.28209	39.2075	6.20177	24.4737	2.20855	0	20.9928	27.9201	0.900262	13.8564	12.0825	2.33781	0.370828	0	13.7226	5.06787	3.67944	3.84276	2.86111	11.0483	2.01074
Aminoacyl-tRNA biosynthesis	g__Nitratidesulfovibrio	57.1464	0.473975	49.2996	0.44535	29.2414	0	0	36.6031	0	412.939	20.0338	56.3872	28.3831	0.50063	0.326081	19.964	57.4578	8.11671	224.017	29.4256	0	12.6977	123.584	55.8887	96.058	26.4445	5.44711	118.035	26.3068	4.40398	141.646	49.307	52.8901	78.2869	47.0809	47.8434	9.21366	6.44733	25.7906	21.3152	3.28473	194.925	87.795
Aminoacyl-tRNA biosynthesis	g__Nocardioides	61.8552	0.51303	102.053	0.921898	12.9507	83.2065	605.006	15.6478	418.145	0	1.49187	0.352349	3.80384	1.04118	65.4896	2.068	68.1383	223.459	2.70234	1.56794	298.762	25.6903	2.52078	4.51936	0	1.30628	0.773374	0	8.96404	2.98115	0	1.48591	3.36265	0.21958	5.64813	0.563631	493.544	39.8721	15.859	46.3761	48.2749	232.797	35.5418
Aminoacyl-tRNA biosynthesis	g__Paludihabitans	54.1213	0.448885	58.7768	0.530962	31.305	0	0	10.7244	0	41.05	10.5711	81.0031	57.4313	2.52084	5.8382	6.03108	0.633705	13.2726	130.716	3.76828	4.49341	8.70528	39.5793	75.4533	160.304	499.758	0.444425	90.7605	172.994	2.2265	108.437	28.7542	7.70813	29.1556	0	90.1073	3.77069	21.0634	136.517	31.48	136.896	42.5977	66.5594
Aminoacyl-tRNA biosynthesis	g__Parabacteroides	55.2412	0.458173	52.0639	0.470321	15.6266	2.44393	0	31.6374	0	145.496	27.6643	50.7186	5.49247	2.0606	12.594	16.7656	3.78073	16.1283	56.5612	76.1632	1.07016	150.855	26.8181	56.7278	13.4169	42.7077	1.25464	112.999	13.2447	488.006	70.9146	66.9358	120.63	28.5243	0.908553	8.31508	0.642255	164.689	5.34918	40.8793	2.82706	165.564	79.4006
Aminoacyl-tRNA biosynthesis	g__Ruminiclostridium	37.2856	0.309248	72.3589	0.653657	18.9986	0	0	15.6329	0	16.3727	10.3976	20.758	17.0533	10.5191	0.27576	37.5639	10.294	9.89943	60.4173	10.0822	0.592881	8.04571	12.1022	350.187	17.568	369.056	10.6283	12.387	14.0976	0.858177	15.8997	21.3167	10.1889	37.3739	375.662	69.7447	9.34068	20.9334	40.3827	22.8922	18.1748	65.6508	28.4488
Aminoacyl-tRNA biosynthesis	g__Ruminococcus	186.759	1.54899	71.114	0.642411	290.874	4.94258	522.027	46.9624	9.45122	134.951	205.479	263.18	206.134	235.536	23.3534	221.355	262.352	247.857	87.975	119.867	4.20829	289.942	238.61	303.508	167.834	315.628	109.357	58.5891	242.923	192.286	146.027	176.679	297.96	176.928	5.52721	80.6454	73.4704	53.7836	129.804	67.6379	65.3827	109.454	54.3217
Aminoacyl-tRNA biosynthesis	g__Ruthenibacterium	121.514	1.00784	167.308	1.51138	71.4813	14.5713	0	47.6294	0	46.6165	42.5801	159.413	168.11	102.927	42.3044	242.784	111.602	184.893	669.667	89.6511	14.6187	38.1919	61.1208	189.656	149.752	341.772	40.0995	50.5611	111.205	7.32468	85.8122	166.322	100.957	293.804	19.1365	103.413	246.787	146.667	138.228	106.459	294.823	185.88	264.376
Aminoacyl-tRNA biosynthesis	g__Thomasclavelia	49.8787	0.413696	150.128	1.35619	55.4416	0	0	383.82	0	111.378	72.9316	52.7489	43.95	102.9	0	94.8932	1.65592	69.4325	7.55149	106.696	0	6.37118	8.65659	7.13129	6.25211	8.83833	38.5901	16.8477	11.9646	7.98229	13.1281	111.887	60.3955	94.9152	17.7564	188.17	576.785	106.356	37.7115	54.2751	250.277	111.527	8.29278
Aminoacyl-tRNA biosynthesis	g__Ureaplasma	113.174	0.938675	18.7416	0.169303	67.3323	105.135	78.2445	22.8367	5.20755	474.739	170.447	123.678	10.3949	16.1533	0	3.36583	17.9357	71.2903	61.5156	387.114	6.89443	431.958	234.64	9.83324	7.95975	3.55605	687.257	37.3938	3.7273	77.3729	194.5	11.5292	42.3519	30.8712	106.588	7.43544	0.480355	0	4.81757	0	0	49.2133	0.139498
Aminoacyl-tRNA biosynthesis	g__unclassified_f__Erysipelotrichaceae	6.32936	0.0524961	104.687	0.945691	2.69361	0	0	0.082844	0	0.726255	4.6467	1.66086	8.40003	13.8676	0.652162	23.3597	0.447849	37.4741	0.496307	5.28329	0	0	0.294726	25.1101	2.0431	1.75714	2.69402	0.435927	0.442683	2.69992	1.27783	6.80288	30.1171	16.4142	41.8247	376.057	58.2295	149.961	6.52776	73.2246	89.1361	110.509	36.7101
Aminoacyl-tRNA biosynthesis	g__unclassified_f__Nitrososphaeraceae	304.661	2.52687	173.485	1.56718	10.262	1142.58	34.6937	4.08337	3338.06	3.38146	5.73683	21.9069	6.64936	41.1314	1208.79	20.5413	135.677	9.87875	27.9718	44.0521	2516.32	384.047	5.71023	4.53357	1.15263	5.21137	1.14172	0	86.6628	40.4451	0	20.2444	15.4851	3.46391	22.7422	1.08079	899.949	148.158	58.6984	53.3856	204.463	121.171	51.7154
Aminoacyl-tRNA biosynthesis	g__unclassified_p__Bacillota	93.9055	0.778857	1489.12	13.452	0	0	0	0	0	0	0	0	0	0	0	0	0	0	0	0	0	0	2817.17	0	0	0	0	0	0	0	0	0	0	0	10789.3	1277.96	0	0	0	0	141.034	1019.89	173.932
Antifolate resistance	g__Acetatifactor	4.70238	0.303922	17.3096	1.6185	6.97218	0	0	14.0859	0	4.18481	0.228949	6.36071	4.82281	2.0806	0	4.05806	0.447256	1.17545	8.8548	13.0592	0	1.36601	5.92798	1.36152	3.42411	12.0773	0.975361	13.7033	6.06896	0	6.74205	4.40402	0	18.6901	7.48868	4.03843	7.68156	23.0464	64.0281	7.52716	6.45992	20.5406	14.9758
Antifolate resistance	g__Akkermansia	4.15474	0.268526	14.3492	1.34169	0	0	0	0	0	0	0	1.06778	5.05247	0	0	0	0	0	1.80754	0.0567028	0	0.466462	0	0	8.68711	0	0	13.8309	93.6731	0	0	0	0	0	0	0	36.3713	2.6955	0.0693151	1.19	5.14248	0	83.6741
Antifolate resistance	g__Alistipes	37.7148	2.43756	0.291688	0.0272737	8.77018	27.1821	0	22.0599	0	107.196	32.6672	59.8889	14.0082	0.153752	1.42954	18.1878	0.172827	7.0872	123.065	36.4207	0	99.4694	8.33333	10.0767	8.62676	74.1103	3.01943	137.556	25.2386	30.2523	83.7606	33.6375	143.151	15.9217	0	0	0	0.440147	0.285792	0	0	0	1.89925
Antifolate resistance	g__Amedibacillus	14.9176	0.964148	3.25727	0.304564	5.9407	0	5.43185	2.31222	0	4.47462	118.791	20.2883	48.3333	0.504851	3.50377	32.1536	1.98963	0	1.55925	0.875197	0	15.0195	3.94461	4.83252	25.1905	6.34473	0.196743	1.67845	19.3994	27.4534	3.84452	29.7415	55.4992	8.22604	0.183546	0.819827	0.912189	3.68457	0	0.19409	0.649776	22.7637	0.107701
Antifolate resistance	g__Amedibacterium	8.8332	0.570902	39.9326	3.73382	2.48101	0	0	0.0922627	0	1.54012	8.95926	0	0.920231	23.0824	0	39.674	0.721734	55.6401	0.388227	3.41163	0	1.96051	0.131294	12.3593	1.33745	2.02575	6.49247	0.984672	0.107514	2.42661	0	13.7628	62.118	24.3787	17.2211	158.337	17.2977	80.6336	2.64659	29.6651	26.8243	21.3634	5.40486
Antifolate resistance	g__Anaerorhabdus	32.7917	2.11937	58.6168	5.48085	8.89181	1.13507	0	145.987	0	17.6511	137.403	18.7035	48.4117	123.217	69.8944	58.7154	9.87082	17.7366	1.97476	1.58793	0	6.92089	5.83083	9.39354	26.0075	6.05439	12.3514	10.2726	27.3111	40.9296	2.21563	96.6645	65.1988	13.4194	1.16192	11.4871	232.122	136.953	0.149627	54.3935	83.8977	3.06234	4.32476
Antifolate resistance	g__Anaerotignum	10.9732	0.709211	5.14789	0.481344	12.5616	0	0	17.7433	0	4.88986	4.02343	40.2004	5.04646	7.87841	5.41706	9.85592	0.266416	22.6831	4.86143	0.397664	0	2.30805	5.12937	3.2332	14.1828	18.3927	16.7262	10.4973	10.6615	3.73567	9.64068	15.5938	15.8151	67.4537	2.83265	1.38032	1.42732	0.329217	12.973	14.3743	4.72753	3.97874	4.30799
Antifolate resistance	g__Bacteroides	16.6177	1.07403	13.0774	1.22278	3.23705	0	0	51.8344	0	51.2986	58.5942	18.2413	2.09538	1.11364	0.836966	6.05121	0	3.37533	13.7177	75.0228	0	13.6591	0.56213	1.34449	2.03975	8.01476	0.581923	67.7808	7.05135	13.3254	7.60925	50.6905	4.20479	36.2493	0	15.4651	0.457249	23.458	13.7072	14.2818	2.80904	31.1094	16.4088
Antifolate resistance	g__Bilophila	14.2325	0.91987	11.8177	1.10499	10.8587	0	0	21.6588	0	15.073	4.96938	12.5928	50.6317	0	0	7.18696	5.00133	0.275106	33.4732	17.2572	0	2.69982	3.48695	40.054	39.1774	36.2605	1.71707	20.7229	19.1141	1.76361	39.7445	9.50832	17.2033	16.5457	3.84285	8.93318	11.578	0.460571	30.7264	31.7244	4.09659	4.57348	10.4242
Antifolate resistance	g__Bradyrhizobium	13.1332	0.848817	1.61779	0.151268	0.877532	13.9648	69.7587	0.0865492	1.38278	0.206393	0	0	0	0.97528	9.74324	0.205344	2.84045	7.26571	0	0.785895	279.418	4.55595	0	0.276144	0	0.317497	0	0	0.628412	0	0	0.706901	0	0	0	0	9.79782	0.325689	0	0.791786	0.716624	2.71484	0.21331
Antifolate resistance	g__Breznakia	327.638	21.1757	21.1145	1.97427	765.887	15.7207	1720.84	0.585761	22.0384	184.26	138.135	298.813	185.704	751.257	3.32678	244.696	879.095	650.715	1.67833	266.323	3.77991	1086.78	744.601	262.71	3.08544	76.9079	309.168	13.1818	141.336	590.245	171.599	29.8523	203.211	63.6055	30.3408	49.8523	26.508	13.0276	2.83971	18.4557	33.2007	1.27649	14.5295
Antifolate resistance	g__Butyrivibrio	13.2651	0.857346	15.002	1.40273	4.37972	0	0	3.98246	0	1.97387	91.1116	23.685	35.3821	2.41213	5.25566	30.03	1.92864	1.7014	1.15197	0.674547	0	3.69941	10.9111	3.22086	22.1976	9.03953	0.986773	3.72303	16.3141	24.2633	12.454	22.4148	48.5687	16.4922	1.92626	17.7813	1.59552	4.51132	13.3908	41.1458	8.94073	8.77114	36.9547
Antifolate resistance	g__Candidatus_Avidesulfovibrio	33.5685	2.16958	27.4162	2.5635	16.3757	0	0	39.1492	0	25.4558	14.517	26.5216	216.581	0.327799	0	11.6028	16.7766	0.815641	101.154	49.1375	0	5.15605	2.1862	59.0194	74.9442	109.956	3.08409	21.2349	21.8159	17.0234	61.1768	16.751	65.8472	30.443	5.5777	29.9139	80.1314	34.8849	2.22506	0.180847	34.5762	2.23146	57.0247
Antifolate resistance	g__Candidatus_Methanobinarius	12.6073	0.814826	4.6445	0.434275	0	0	0	0	0	0	0	0	0	0	0	0	0	0	0	0	0	0	378.218	0	0	0	0	0	0	0	0	0	0	0	26.6356	0	0	0	0	0	3.86151	0	11.3034
Antifolate resistance	g__Candidatus_Stoquefichus	0	0	26.3606	2.46479	0	0	0	0	0	0	0	0	0	0	0	0	0	0	0	0	0	0	0	0	0	0	0	0	0	0	0	0	0	0	1.70561	26.2527	41.5259	68.639	2.55609	20.3867	51.6149	15.8459	8.71839
Antifolate resistance	g__Christensenella	18.7458	1.21157	4.42091	0.413368	0.871839	0	0	0.0960189	0	2.19978	0.181183	8.04621	45.9283	0	0	3.09707	6.48532	2.98957	17.0571	0.346206	0	0	19.9873	138.828	101.933	93.4279	8.38835	4.94514	26.7783	0	38.4527	10.0744	1.18794	31.071	1.70554	0	10.5237	4.67723	0.844049	12.1741	3.60522	1.34763	4.91066
Antifolate resistance	g__Clostridium	133.542	8.631	70.3864	6.58134	203.715	103.11	7.3787	504.031	0.971532	170.508	224.414	254.425	194.776	11.667	38.0976	215.159	396.966	41.286	40.0026	132.378	10.3637	95.7835	40.8359	72.4019	249.163	72.1728	63.4664	122.678	96.9843	22.7896	42.7798	208.883	150.156	218.914	17.8411	25.3105	54.3322	93.95	153.841	84.1929	118.586	38.3458	47.0781
Antifolate resistance	g__Coprobacillus	13.7047	0.885755	5.88683	0.550437	1.33871	0	0	29.7136	0	14.5012	68.3296	2.70121	3.58582	85.4071	0	63.8427	0	7.06327	0.493924	69.8321	0	0	0.544948	2.6772	0.121365	0.217498	0.124949	1.25989	2.09743	4.73645	0.12375	18.3462	12.5755	21.5069	0.790046	8.03373	0	16.8352	0.269224	5.76455	13.8363	2.52452	4.92793
Antifolate resistance	g__Desulfovibrio	22.2936	1.44087	23.5247	2.19963	16.656	0	0	7.25148	0	139.783	6.12504	29.3916	13.791	0.322346	0.838931	7.43196	11.8886	7.22773	104.576	11.6802	0	7.00433	42.7351	24.3893	34.5628	10.771	0.771016	47.1687	9.00718	2.17686	55.4122	19.3888	31.2551	27.2012	25.2456	14.3769	5.47313	3.32973	8.96208	21.0766	3.26055	70.0231	59.9743
Antifolate resistance	g__Dorea	10.8444	0.700889	8.39845	0.785281	4.75597	0	0	6.93624	0	5.09581	2.76553	10.6624	29.2834	6.14057	20.9272	9.16508	3.75155	0.910554	3.5388	0.896006	1.50073	1.04407	5.55584	92.4144	20.6418	7.01742	5.54519	2.47784	37.4742	1.87485	6.80884	21.3441	4.47682	12.3266	1.45431	0.884161	30.6143	16.202	8.11764	8.18911	3.93391	4.16594	2.02467
Antifolate resistance	g__Eubacterium	12.8425	0.830026	22.1357	2.06975	39.569	0	0	35.9253	0	20.1416	20.579	26.879	15.908	4.0632	0	10.3183	1.17069	5.49809	7.59631	9.53645	1.38696	20.1286	0	1.58998	2.80367	8.5187	5.83841	11.531	76.4604	0.942562	1.71651	12.6836	4.23284	40.2555	12.3737	6.29914	17.851	68.2729	12.441	20.9334	18.4681	37.7545	4.82726
Antifolate resistance	g__Extibacter	1.83196	0.118402	11.8022	1.10354	3.11267	0	0	2.54656	0	1.47218	4.86693	5.79681	0.330555	2.94858	4.38509	8.64712	2.71647	0.396626	1.30097	0.597988	0	0	0	0.948716	2.87702	0.677846	0	0.247134	0.539548	0	0.771352	2.91527	0	6.86344	7.59521	5.85858	10.0209	36.6869	10.9077	7.91836	14.0283	11.3759	1.82762
Antifolate resistance	g__Flavonifractor	2.6138	0.168934	11.8826	1.11106	4.14999	0	0	3.82277	0	3.7025	14.8991	4.03085	1.38324	0.0878002	1.0329	7.82666	0	0.312319	1.05274	2.76074	0	0	0.137338	0.494376	2.25137	7.09992	0	2.17298	1.38133	2.40529	2.63527	2.26568	10.7694	1.73958	0	18.987	1.32882	11.8706	11.8249	1.38673	10.1388	10.3299	41.0767
Antifolate resistance	g__Kineothrix	4.30473	0.278221	29.8278	2.78899	6.90935	0	0	12.3741	0	1.24444	0.548813	3.84233	0.641703	1.03566	0	0.685835	0	0.469613	23.6178	13.8918	0	2.83338	8.19139	0.971475	1.22242	8.92199	0.771427	6.04697	9.51247	0	4.44707	5.42734	0	15.5345	4.05818	29.6982	3.12072	8.85157	49.5051	71.2037	5.61141	16.6893	79.712
Antifolate resistance	g__Lachnoclostridium	1.42997	0.0924208	48.2901	4.51527	0.13683	0	0	0	0	0	0	1.62849	2.87711	3.63067	4.33719	0.390864	0.439888	0.156917	0.128676	0	0	0	0.912363	1.86842	1.03501	1.25607	0.585927	0.879966	8.00483	0.733155	1.83102	5.96249	3.82798	2.27512	17.8307	24.4392	49.7707	98.7432	85.4758	66.3103	37.6889	13.5714	40.7809
Antifolate resistance	g__Ligaoa	1.54872	0.100096	12.7914	1.19603	1.26106	0	0	2.43298	0	1.75866	1.31553	3.07586	0.301076	0.690502	0.629198	1.36711	0	0.318473	8.13998	0.871923	0	0	2.80291	0.770296	1.84783	0.890533	0.385508	3.7064	1.88339	0.453692	4.65671	1.39538	2.74109	2.76554	1.29558	17.5081	24.3991	6.85831	7.49546	20.3009	11.5904	11.4508	14.2235
Antifolate resistance	g__Mailhella	8.51435	0.550295	4.63478	0.433366	3.96156	0	0	11.7597	0	9.14729	3.22969	1.99073	5.13944	0.254159	0	5.45969	5.5401	0.459271	21.6957	29.6629	0	2.58756	6.37169	31.1208	25.3516	17.1297	4.92492	10.3293	3.82723	0	32.4776	3.26991	5.95652	13.7836	5.77288	6.41959	0	0	0.325903	0	0.538225	0	28.6564
Antifolate resistance	g__Methanobrevibacter	0	0	104.664	9.78641	0	0	0	0	0	0	0	0	0	0	0	0	0	0	0	0	0	0	0	0	0	0	0	0	0	0	0	0	0	0	729.493	122.118	0	0	0	4.80374	7.86551	76.5503	1.14661
Antifolate resistance	g__Methyloceanibacter	16.4206	1.06129	0.652911	0.0610492	0.347988	183.829	4.09851	0.301445	124.494	0.162139	2.14624	0.961999	3.41762	5.23836	60.1676	1.51662	10.9202	2.37325	0.998176	2.64209	80.0035	2.42544	0.23656	0.708062	0.433559	0.607082	0	0	1.12867	1.41571	0	0.51073	1.08625	0.446611	0	0	4.42953	0	0.314855	0.118611	1.01321	0	0
Antifolate resistance	g__Mucinivorans	13.4485	0.869199	5.15039	0.481577	3.77726	0	0	8.52692	0	45.9645	21.8659	14.3359	8.53267	1.20871	0	10.3332	0	5.92489	70.2955	14.4247	0	30.2209	0.579152	4.30754	3.0504	27.2031	0.457201	65.7525	6.99559	3.87323	28.3231	7.05067	15.3169	5.13597	0	0	0	0	0.476319	0	0	0.41873	45.4585
Antifolate resistance	g__Mycobacterium	14.4664	0.934986	0.680701	0.0636476	1.5716	116.598	27.5951	0	93.0294	0	1.66883	1.26569	11.3558	3.30104	83.7647	3.25154	12.8837	2.45383	3.86826	2.07513	35.6462	18.0522	0.874909	4.75009	0.753677	1.2967	0	0	2.78712	2.32779	0.687051	1.35407	0.611027	0.169122	0	0	0.510207	0.811338	0	0.495153	1.00665	2.7334	0.569559
Antifolate resistance	g__Mycolicibacterium	10.522	0.680054	0.805585	0.0753247	3.30362	80.5011	11.2634	0.555628	107.698	0	1.80041	3.35974	0.356824	2.31614	27.7497	3.42458	16.1786	1.50774	2.50893	0.990682	21.8739	19.5136	0	3.01671	0	0.786482	0	0	1.87298	4.12044	0	0.242073	0.719328	0	0	0	4.04358	0.734231	0	0.228749	0.874423	0.950786	0.418495
Antifolate resistance	g__Mycoplasma	17.2287	1.11352	0.782323	0.0731495	17.4366	0	0	185.612	0	43.4357	0.0910281	24.4229	9.7619	0.75164	0	1.14069	0	1.76464	1.27761	31.5557	0	6.23162	35.3385	11.8531	10.3454	6.87924	12.6791	6.78588	5.20424	0	40.2927	38.104	1.01419	24.8835	0	0	0	1.85029	5.06631	0	0.124305	0	0
Antifolate resistance	g__Niameybacter	0	0	17.8087	1.66517	0	0	0	0	0	0	0	0	0	0	0	0	0	0	0	0	0	0	0	0	0	0	0	0	0	0	0	0	0	0	1.43726	102.944	0.510207	31.6857	0	6.29642	4.11892	13.2858	0
Antifolate resistance	g__Nocardioides	9.71288	0.627757	12.8491	1.20143	1.03967	21.271	70.2635	1.25477	67.4626	0	0	0	1.09593	0.67694	26.3023	0.11086	9.00499	23.2435	1.03275	0.703008	55.56	8.1121	0	0.489369	0	0.425223	0	0	1.8345	0.247997	0	0.569048	0.576881	0.109466	1.47637	0	54.5975	8.86821	2.42355	5.59147	6.51529	30.6621	5.50734
Antifolate resistance	g__Parabacteroides	12.7312	0.822837	8.24408	0.770847	2.8995	0.721186	0	6.33963	0	27.0261	8.64304	8.81925	1.79467	0.805865	0.838931	5.54471	0.0758451	1.60131	18.7033	11.7424	0	40.2695	7.49481	7.60576	4.73384	12.4536	0.18889	34.4812	3.36526	101.171	15.2369	10.9051	29.9401	18.5349	0.0924736	0.193245	8.73194	29.0783	1.36627	4.60272	2.50834	21.6613	5.96219
Antifolate resistance	g__Plesiomonas	11.0115	0.71169	0	0	0	0	0	0	0	0	0	1.52474	25.0163	0	2.69724	0	0	0	24.9482	0	0	0	1.50909	4.36674	4.29017	3.51633	0	233.481	2.19297	0	26.6584	0	0.144216	0	0	0	0	0	0	0	0	0	0
Antifolate resistance	g__Pseudoflavonifractor	2.96246	0.191468	15.048	1.40704	3.06895	0	1.11697	2.15783	1.14258	5.21255	7.72925	2.08622	2.14254	0.547601	0	11.2669	0.464134	0	3.13691	3.07336	0	3.76454	0.710974	1.01327	4.66619	9.15513	0.340963	4.34851	6.44328	0	1.69006	2.90822	7.44914	3.23767	0.612579	35.9725	5.81743	23.6663	8.78682	8.9289	13.7489	17.1295	20.7695
Antifolate resistance	g__Pseudomonas	13.4823	0.871382	0.0270821	0.00253225	0	0	0	0	0	0	0	0	0	0	0	0	0.137682	0	0	0	0	0.498661	0	0	0	0	0	0	0	403.833	0	0	0	0	0	0	0	0	0	0	0	0.243738	0
Antifolate resistance	g__Rikenella	10.9695	0.708975	0.473892	0.0443103	3.10285	0.359748	0	6.75442	0	45.0637	17.7022	26.8603	6.42686	0.204531	0.419465	9.50209	0.316529	8.23271	35.2175	7.83516	0	19.437	0.693616	4.79145	4.11099	21.9231	1.25668	43.8344	8.7868	5.17633	29.296	7.90281	8.67678	5.20134	0	0	0	0	0	0	0.0866368	0	4.17839
Antifolate resistance	g__Roseburia	3.1951	0.206504	7.5232	0.703442	0.610026	0	0	3.65746	0	0.469137	0	13.5972	5.26346	0.0831232	2.17177	2.25392	0.718222	0.313075	12.8474	0.272148	0	0	1.12428	3.33047	5.75716	2.83109	0	3.7666	9.08618	0.209983	4.09171	5.44029	1.3559	16.6022	0.213777	3.81943	0.988759	0.826761	22.7686	17.192	11.3499	3.6725	6.87719
Antifolate resistance	g__Ruthenibacterium	8.19428	0.529608	5.064	0.473499	2.68255	1.4735	0	2.4826	0	4.42612	3.16452	13.5038	12.0469	6.02605	1.67524	16.0002	4.60127	11.57	44.1458	4.23333	0.982574	6.14029	5.31748	12.7884	13.1616	19.701	3.04226	3.59944	9.2858	1.19554	9.71204	9.67137	8.61131	14.5874	0.261454	5.01161	5.28336	7.46365	5.66567	2.34048	2.17994	5.16856	12.2013
Antifolate resistance	g__Taishania	12.6453	0.817281	0.0853337	0.00797896	26.5915	0	5.98529	0	0	3.20709	0.475178	3.3958	48.6054	0	0	0	0	0.406604	0	0	0	3.36204	42.3353	18.7883	46.9446	21.1663	0	0.698547	25.0775	33.3813	96.2826	0.68968	1.9646	0	0.228567	0	0	0	0	0	0.539437	0	0
Antifolate resistance	g__Thetidibacter	11.6123	0.750519	0.121048	0.0113184	31.066	0	6.78143	0	0	3.91869	0.179462	2.99249	35.707	0	0	0	0	0	0	0.231525	0	10.158	47.8317	13.3153	42.6998	17.8462	0	0	25.4856	27.2643	81.3813	0.520946	0.989302	0	0.172647	0	0	0	0	0	0.916786	0	0
Antifolate resistance	g__Thomasclavelia	9.04644	0.584684	24.9182	2.32993	5.91664	0	0	2.12537	0	1.18245	8.50942	0	0	26.1282	0	46.8286	0	65.9739	0.361874	4.23082	0	1.82445	0	2.77087	2.13404	1.31983	5.21802	2.06226	0.150079	4.27096	0	10.3546	58.1033	21.9275	16.2052	21.0956	63.2233	10.2164	12.5506	10.648	74.2452	10.9355	5.1443
Antifolate resistance	g__Vibrio	20.8076	1.34483	0	0	103.448	11.9948	0	18.443	10.7788	3.39905	25.6413	42.9471	0.962151	0.835447	1.88759	161.779	0.138978	26.3126	1.81144	22.2903	0	14.3236	0	1.38072	0.697849	0	7.55794	11.5094	2.09509	121.513	0.145521	19.6265	10.0757	2.63341	0	0	0	0	0	0	0	0	0
Antifolate resistance	g__Zhaonella	13.2394	0.85568	30.892	2.8885	1.36499	0	0	4.93393	0	1.08943	3.93316	3.92202	33.1371	0	0	3.76281	3.03766	0.313075	25.4161	10.8565	0	3.23587	194.283	6.27175	10.8817	35.5812	0.0974181	5.85224	2.23592	3.34345	18.5703	2.03564	17.1439	5.882	202.733	16.4917	0.866251	0	11.8497	10.7825	7.60688	11.7433	15.9543
Antifolate resistance	g__unclassified_c__Caudoviricetes	52.6673	3.40397	0.640959	0.0599316	0	0	0	3.944	1.56522	3.2462	8.14363	7.57659	0	65.1979	0	4.03668	0.306213	1275.58	0.172125	36.7712	61.2187	31.3624	11.0338	0.373756	8.72651	0	0	2.33189	0	0.880641	2.03447	20.5178	25.8522	9.14797	0	0	0	0	1.39673	0	1.76149	0	2.61041
Antifolate resistance	g__unclassified_f__Erysipelotrichaceae	1.37525	0.0888846	26.8756	2.51295	0	0	0	0	0	0	3.8698	0	1.15985	19.9456	0.366173	0.707251	0	0	0.103747	1.66788	0	0	0	8.71686	1.04848	0.64708	0	0.0788315	0	0	0	1.31969	0	1.62635	21.6994	103.089	9.44823	33.1139	3.63874	14.1476	21.8467	28.068	6.82865
Antifolate resistance	g__unclassified_f__Nitrososphaeraceae	11.2504	0.727131	2.94531	0.275395	0.224598	39.4254	0	0	96.0846	0	0.613213	1.04283	0	1.84218	51.6832	0.523776	6.0203	0.312319	0.256109	1.42778	118.132	16.2734	0.443794	0.364719	0.18879	0	0	0	1.36955	0.263118	0	0.769936	0.251507	0	0.851786	0.0959372	13.5669	2.28432	0.614823	1.3726	3.34566	3.75245	0.62329
Arachidonic acid metabolism	g__Acinetobacter	0.968542	1.13791	0	0	0	0	0	0	0	0	0	0	0	0	23.6546	0	0	0.447405	0	0	0	2.77456	0	0.835896	0	0	0	0	0	1.34382	0	0	0	0	0	0	0	0	0	0	0	0	0
Arachidonic acid metabolism	g__Actinomycetospora	0.565563	0.66446	0	0	0	0	0	0	0	0	0	0	0	0	0	0	0	16.9669	0	0	0	0	0	0	0	0	0	0	0	0	0	0	0	0	0	0	0	0	0	0	0	0	0
Arachidonic acid metabolism	g__Acytostelium	1.53946	1.80866	0	0	0	0	0	0	0	0	0	0	0	0	44.001	0	0	0	0	0	0	0	0	2.18282	0	0	0	0	0	0	0	0	0	0	0	0	0	0	0	0	0	0	0
Arachidonic acid metabolism	g__Aliiruegeria	0.46957	0.551681	0	0	0	10.9124	0	0	0	0	0	0	0	0.37519	1.95292	0.197489	0	0	0	0.177545	0	0	0	0	0	0	0	0	0	0.4716	0	0	0	0	0	0	0	0	0	0	0	0	0
Arachidonic acid metabolism	g__Anabaena	0	0	0.501704	4.2572	0	0	0	0	0	0	0	0	0	0	0	0	0	0	0	0	0	0	0	0	0	0	0	0	0	0	0	0	0	0	0	0	4.51533	0	0	0	0	0	0
Arachidonic acid metabolism	g__Blakeslea	0.655243	0.769822	0	0	0	0	0	0	0	0	0	0	0	0	18.9861	0	0	0	0	0	0	0	0.671238	0	0	0	0	0	0	0	0	0	0	0	0	0	0	0	0	0	0	0	0
Arachidonic acid metabolism	g__Candidatus_Avichristensenella	0	0	0.552717	4.69007	0	0	0	0	0	0	0	0	0	0	0	0	0	0	0	0	0	0	0	0	0	0	0	0	0	0	0	0	0	0	0	1.29515	0	0	1.18573	0.408829	0	2.08474	0
Arachidonic acid metabolism	g__Clostridium	6.17505	7.25484	0.446159	3.78588	10.0436	19.4223	0	0.218124	0	2.24206	2.17107	4.65458	10.847	0.789192	0	27.3783	50.9364	0.474205	3.65793	1.30818	0	0	0	4.66845	18.8907	1.0894	0.693684	3.24115	6.32237	0	0	1.68181	10.4774	4.04355	0	0	1.27642	2.73901	0	0	0	0	0
Arachidonic acid metabolism	g__Cylindrospermum	0	0	0.885103	7.51052	0	0	0	0	0	0	0	0	0	0	0	0	0	0	0	0	0	0	0	0	0	0	0	0	0	0	0	0	0	0	0	0	7.77361	0	0	0	0.19231	0	0
Arachidonic acid metabolism	g__Desulfovibrio	0.980488	1.15194	0	0	1.20372	0	0	4.96872	0	1.81469	0	1.12085	0	0	0	1.02891	0	0.460142	0	0.23125	0	0	0.7644	3.5771	1.11259	1.57279	1.14544	0.143355	0.469465	0	8.72506	0.520328	0.555822	0	0	0	0	0	0	0	0	0	0
Arachidonic acid metabolism	g__Entomophthora	0.482961	0.567414	0	0	0	0	0	0	0	0	0	0	0	0	14.0545	0	0	0	0	0	0	0	0	0.434384	0	0	0	0	0	0	0	0	0	0	0	0	0	0	0	0	0	0	0
Arachidonic acid metabolism	g__Filomicrobium	0.545348	0.64071	0	0	0	11.5209	0	0	0	0	0	0	0	0.143041	0.744551	0	0.614978	0	0	0.135378	3.20155	0	0	0	0	0	0	0	0	0	0	0	0	0	0	0	0	0	0	0	0	0	0
Arachidonic acid metabolism	g__Fusarium	0.484255	0.568934	0	0	0	0	0	0	0	0	0	0	0	0	12.6001	0	0	0	0	0	0	0	0.68845	1.23911	0	0	0	0	0	0	0	0	0	0	0	0	0	0	0	0	0	0	0
Arachidonic acid metabolism	g__Heliocybe	0.470769	0.553089	0	0	0	0	0	0	0	0	0	0	0	0	13.5373	0	0	0	0	0	0	0	0	0.58576	0	0	0	0	0	0	0	0	0	0	0	0	0	0	0	0	0	0	0
Arachidonic acid metabolism	g__Heterostelium	1.31024	1.53935	0	0	0	0	0	0	0	0	0	0	0	0	38.9822	0	0	0	0	0	0	0	0	0.324876	0	0	0	0	0	0	0	0	0	0	0	0	0	0	0	0	0	0	0
Arachidonic acid metabolism	g__Hyphomicrobium	0.666123	0.782603	0	0	0	8.79097	0	0	4.71037	0	0	0	0	0.221483	1.15285	0.902433	1.84273	0.417097	0	0	0	0	0	0	0	0	0	0	0	0	0	1.35382	0	0.591927	0	0	0	0	0	0	0	0	0
Arachidonic acid metabolism	g__Kineothrix	0.973457	1.14368	0	0	0.939567	0	0	0	0	0.249965	0	1.12486	0	2.57474	0	0.602342	0.614978	1.0775	0.441787	0	0	0	7.15988	0	0.976989	1.38111	0.670561	0	0.732886	0	6.28652	2.43687	0.8677	1.06547	0	0	0	0	0	0	0	0	0
Arachidonic acid metabolism	g__Klebsiella	0.283397	0.332953	0.16887	1.43294	0	0	0	0	0	0	0	0	1.96439	0	6.53752	0	0	0	0	0	0	0	0	0	0	0	0	0	0	0	0	0	0	0	0	0	0	0	0	1.51983	0	0	0
Arachidonic acid metabolism	g__Lyngbya	0.456922	0.536822	0	0	0	0	0	0	0	0	0	0	0	0	13.1391	0	0	0	0	0	0	0	0	0.568532	0	0	0	0	0	0	0	0	0	0	0	0	0	0	0	0	0	0	0
Arachidonic acid metabolism	g__Maritimibacter	1.14771	1.3484	0	0	0.240915	19.0375	0	0	10.4004	0	0.161439	0	0.230258	0.293418	0	0.154447	2.20761	0	0	0	0	1.14223	0	0	0	0	0	0	0	0.184408	0	0.15621	0.222487	0	0	0	0	0	0	0	0	0	0
Arachidonic acid metabolism	g__Methyloceanibacter	6.20373	7.28854	0	0	0	49.2312	0	0	66.3758	0	0	0.499633	0	0.608562	38.7626	1.54831	3.27154	0	1.86888	0.315444	18.8602	0	0	2.84472	0.507527	0.345278	0	0	0.549665	0.269696	0	0	0.252728	0	0	0	0	0	0	0	0	0	0
Arachidonic acid metabolism	g__Microbulbifer	0.811206	0.953057	0	0	0	24.3362	0	0	0	0	0	0	0	0	0	0	0	0	0	0	0	0	0	0	0	0	0	0	0	0	0	0	0	0	0	0	0	0	0	0	0	0	0
Arachidonic acid metabolism	g__Moniliophthora	0.42228	0.496121	0	0	0	0	0	0	0	0	0	0	0	0	12.371	0	0	0	0	0	0	0	0	0.297386	0	0	0	0	0	0	0	0	0	0	0	0	0	0	0	0	0	0	0
Arachidonic acid metabolism	g__Mycena	0.442045	0.519342	0	0	0	0	0	0	0	0	0	0	0	0	12.6433	0	0	0	0	0	0	0	0.253298	0.364719	0	0	0	0	0	0	0	0	0	0	0	0	0	0	0	0	0	0	0
Arachidonic acid metabolism	g__Mycobacterium	0.562413	0.660759	0	0	0	0	0	0	6.27239	0	0	0.231929	0.833203	0	0	0.186291	2.28239	0.333247	0	0	5.94103	0	0	0	0	0	0	0	0.226666	0	0	0.565254	0	0	0	0	0	0	0	0	0	0	0
Arachidonic acid metabolism	g__Mycolicibacterium	1.9271	2.26408	0	0	0	9.07866	0	0.241894	29.608	0	0	0.149981	0	0.114433	0	0.449384	2.38422	1.45877	0	0	2.31438	11.0678	0.344225	0	0	0	0	0	0	0.287676	0	0	0.313626	0	0	0	0	0	0	0	0	0	0
Arachidonic acid metabolism	g__Myxococcus	0.697725	0.819732	0	0	0	0	0	0	0	0	0.331374	0	0.708953	0	0	0	0	0	2.79024	0	0	0	0	0	0	16.961	0	0	0	0	0	0	0	0.140193	0	0	0	0	0	0	0	0	0
Arachidonic acid metabolism	g__Odoribacter	0.59628	0.700548	0	0	0	0	0	0.401441	0	1.32659	0	2.06688	0	0.121307	0	0.127705	0	0	0.843983	0	0	0	1.1385	0	1.79517	0.39042	0.214009	1.13874	2.48612	0	1.99925	0.904139	0.553851	2.3803	0	0	0	0	0	0	0	0	0
Arachidonic acid metabolism	g__Paeniclostridium	1.87829	2.20674	0	0	2.50551	2.27574	0	5.86996	0	1.11095	16.7896	0.999873	5.18849	0	0	2.67708	8.74635	0	0.3927	0.240672	0	0	0	0	2.02635	0	0	3.28231	0	0	0	2.43687	0.385644	1.42062	0	0	0	0	0	0	0	0	0
Arachidonic acid metabolism	g__Parabacteroides	0.292831	0.344036	2.0998	17.8178	0	0	0	0	0	0.523182	0	1.56957	0	0	0	0	0	0	0	0	0	0	0.624408	0	0.227207	1.28475	0	1.63942	0	0	0	2.12518	0.605372	0.185837	0	0.145453	0	8.82513	0	0.550966	0	7.95919	1.41748
Arachidonic acid metabolism	g__Paramyrothecium	0.765218	0.899027	0	0	0	0	0	0	0	0	0	0	0	0	20.8938	0	0	0	0	0	0	0	0.531674	1.5311	0	0	0	0	0	0	0	0	0	0	0	0	0	0	0	0	0	0	0
Arachidonic acid metabolism	g__Phellopilus	0.555932	0.653144	0	0	0	0	0	0	0	0	0	0	0	0	16.6779	0	0	0	0	0	0	0	0	0	0	0	0	0	0	0	0	0	0	0	0	0	0	0	0	0	0	0	0
Arachidonic acid metabolism	g__Photobacterium	7.20515	8.46507	0	0	95.7465	2.12732	0	2.62495	0	11.9839	2.75985	12.891	0.179005	0	0	29.8317	1.03494	1.85414	0.484352	2.48253	0	4.1581	0	0	0	0	3.81376	0	3.41505	0	0	8.90611	30.8878	0.97362	0	0	0	0	0	0	0	0	0
Arachidonic acid metabolism	g__Plesiomonas	4.53217	5.32468	0	0	0	0	0	0	0	0	0	0	12.109	0	1.10304	0	0	0	12.6437	0	0	0	0.293438	3.03117	5.06018	1.7459	0	82.8124	1.54387	0	14.9419	0	0.680419	0	0	0	0	0	0	0	0	0	0
Arachidonic acid metabolism	g__Pleurotus	0.430182	0.505405	0	0	0	0	0	0	0	0	0	0	0	0	12.2632	0	0	0	0	0	0	0	0.263231	0.379021	0	0	0	0	0	0	0	0	0	0	0	0	0	0	0	0	0	0	0
Arachidonic acid metabolism	g__Rhodoflexus	5.99117	7.03881	0	0	22.1427	0	4.54615	0	0	1.46476	0.0802052	1.05082	21.1632	0	0	0	0	0.823567	0	0.137965	0	4.53983	22.3461	6.56649	18.9175	14.075	0	0	13.444	5.86346	41.9101	0	0.66321	0	0	0	0	0	0	0	0	0	0
Arachidonic acid metabolism	g__Roseibium	1.10264	1.29545	0	0	0	0	0	0	33.0793	0	0	0	0	0	0	0	0	0	0	0	0	0	0	0	0	0	0	0	0	0	0	0	0	0	0	0	0	0	0	0	0	0	0
Arachidonic acid metabolism	g__Ruegeria	1.08713	1.27723	0	0	0	10.7303	0	0.138733	13.4211	0	0.138885	0.16542	0.19809	0.378638	0.656957	0	1.62788	0.475368	0	0.119451	4.23735	0	0	0	0	0	0	0	0	0	0	0.134386	0.191404	0	0	0	0	0	0	0	0	0	0
Arachidonic acid metabolism	g__Russula	0.527405	0.61963	0	0	0	0	0	0	0	0	0	0	0	0	15.3478	0	0	0	0	0	0	0	0	0.474358	0	0	0	0	0	0	0	0	0	0	0	0	0	0	0	0	0	0	0
Arachidonic acid metabolism	g__Salpingoeca	0.509356	0.598424	0	0	0	0	0	0	0	0	0	0	0	0	14.6469	0	0	0	0	0	0	0	0	0.633774	0	0	0	0	0	0	0	0	0	0	0	0	0	0	0	0	0	0	0
Arachidonic acid metabolism	g__Scandinavium	0	0	1.05469	8.94956	0	0	0	0	0	0	0	0	0	0	0	0	0	0	0	0	0	0	0	0	0	0	0	0	0	0	0	0	0	0	0	0.139936	0	0	9.35228	0	0	0	0
Arachidonic acid metabolism	g__Spraguea	6.36971	7.48354	0	0	0	0	0	0	0	0	0	0	0	0	0	0	0	0	0	0	0	0	0	0	0	0	191.091	0	0	0	0	0	0	0	0	0	0	0	0	0	0	0	0
Arachidonic acid metabolism	g__Streptococcus	0.413062	0.485292	0	0	0	0	0	0	0	0	0	0	0	0	10.8298	0	0	0	0	0	0	0	0	1.56203	0	0	0	0	0	0	0	0	0	0	0	0	0	0	0	0	0	0	0
Arachidonic acid metabolism	g__Stylonychia	0.567277	0.666473	0	0	0	0	0	0	0	0	0	0	0	0	17.0183	0	0	0	0	0	0	0	0	0	0	0	0	0	0	0	0	0	0	0	0	0	0	0	0	0	0	0	0
Arachidonic acid metabolism	g__Trichoderma	0.635005	0.746044	0	0	0	0	0	0	0	0	0	0	0	0	18.5435	0	0	0	0	0	0	0	0.506595	0	0	0	0	0	0	0	0	0	0	0	0	0	0	0	0	0	0	0	0
Arachidonic acid metabolism	g__Tubulinosema	2.50093	2.93825	0	0	0	0	0	0	0	0	0	0	0.38624	0	0.320237	0	0	0	0	0	0	0	0.481175	0	0	0	0	0	73.8403	0	0	0	0	0	0	0	0	0	0	0	0	0	0
Arachidonic acid metabolism	g__Vibrio	7.28494	8.55882	0	0	26.5288	3.61289	0	5.91433	12.9739	1.6792	7.34298	17.888	0	0.335865	27.783	40.9219	0	10.7099	1.19189	8.02692	0	3.117	0	0.975187	0	0	0.828977	0	0.384605	35.3965	0.18328	8.17799	2.30736	2.26786	0	0	0	0	0	0	0	0	0
Arachidonic acid metabolism	g__unclassified_f__Nitrososphaeraceae	2.36436	2.77781	0.106232	0.90143	0	7.20059	0	0	10.1743	0	0	0	0	0.536404	10.2376	0.188232	1.53744	0	0	0	38.9815	1.3921	0	0	0	0	0	0	0.458054	0.224747	0	0	0	0	0	0	0.482923	0.243832	0	0	0.229333	0	0
Arachidonic acid metabolism	g__unclassified_o__Pleurocapsales	0.666227	0.782726	0	0	0	0	0	0	19.9868	0	0	0	0	0	0	0	0	0	0	0	0	0	0	0	0	0	0	0	0	0	0	0	0	0	0	0	0	0	0	0	0	0	0
Arachidonic acid metabolism	g__unclassified_p__Candidatus_Omnitrophota	0	0	1.46848	12.4608	0	0	0	0	0	0	0	0	0	0	0	0	0	0	0	0	0	0	0	0	0	0	0	0	0	0	0	0	0	0	0	0	0	12.6494	0	0	0	0	0.566993
Bacterial secretion system	g__Aeromonas	56.0988	0.807332	2.51073	0.0471424	0.380905	0	0	0	5.7945	0	0	2.72779	83.3514	0	4.29936	0	0.229898	0.218412	244.035	0	0	6.21648	6.24233	58.5762	30.9076	20.2637	0	934.695	121.311	0.122242	145.733	16.5631	0	1.29584	0	1.02035	0.600044	0.36583	0.239584	2.68116	8.15229	0	9.53728
Bacterial secretion system	g__Akkermansia	18.2828	0.263113	67.9304	1.27549	0.257415	0	0	0.147404	0	0.439998	0	6.43447	20.7401	0	0	0.167317	0.975295	0	5.18828	2.29882	0	1.27001	0.902751	0.432888	41.3782	1.32661	0	71.8515	389.699	0.570283	2.50432	1.00253	0.237726	0.659419	0.240853	0.191983	141.527	21.7349	0.295328	0.226725	26.302	0	420.854
Bacterial secretion system	g__Alistipes	108.383	1.55977	4.11541	0.0772727	44.2705	0.411279	0	77.6625	0	393.28	101.957	198.534	38.536	3.07631	10.7812	73.7391	3.91987	38.6949	212.09	98.6981	4.62875	278.869	26.8	17.9783	31.1333	166.241	10.8247	489.456	55.3176	105.648	195.701	105.194	393.45	74.5981	0.228783	2.49957	0.62713	1.39021	1.48624	0.0349999	1.20539	14.8009	14.7655
Bacterial secretion system	g__Amedibacillus	5.66091	0.0814676	65.2481	1.22513	3.37206	0	0	0.0578764	0	0.368046	6.02573	0	0	11.4784	4.82657	26.7174	0	47.7934	0	0.896982	0	0.409942	0	0	0	0	3.45565	0	0	2.31641	0	8.12913	41.2823	12.6974	4.31216	307.499	7.81882	102.938	0.978479	26.7679	19.9829	114.428	2.50764
Bacterial secretion system	g__Anaerorhabdus	106.75	1.53626	145.857	2.73867	36.0379	3.27499	0	600.94	0	63.9629	347.457	34.4665	85.2597	488.022	314.25	191.521	34.1685	66.0016	4.52712	7.55377	0.500895	24.394	10.4996	23.8071	49.6502	8.16562	43.0497	33.2234	73.5591	111.686	3.68361	358.813	150.725	33.2857	8.66294	27.7502	538.264	304.987	0.125517	116.813	287.187	16.2176	12.7034
Bacterial secretion system	g__Anaerotignum	47.4255	0.682513	33.3867	0.626883	58.1978	1.97172	0	68.1127	0	34.8181	35.5018	141.035	31.2395	26.6654	15.2564	63.1176	11.3859	61.7989	56.3903	17.4076	0	15.6118	38.6701	33.1929	51.0626	86.4217	51.4949	56.3665	41.9584	10.7595	45.1758	104.217	62.8702	202.066	16.6567	23.8377	25.1808	2.38288	59.34	70.023	20.6784	43.409	38.9719
Bacterial secretion system	g__Anaerotruncus	45.9757	0.661648	96.2892	1.80797	26.1718	10.9375	0	63.4414	0	54.8965	15.5643	93.4585	25.8612	4.19334	2.98016	52.5557	10.2932	26.6661	114.503	13.3261	0	1.97834	176.171	24.9882	92.216	102.148	6.96881	53.9807	38.4448	2.3639	121.856	32.2506	75.3128	135.743	19.7607	113.911	105.244	55.8042	129.458	181.8	106.287	96.5759	57.7622
Bacterial secretion system	g__Angelakisella	18.4166	0.265038	67.4583	1.26662	20.7354	1.82872	0	9.29286	0	22.2859	16.1865	67.9292	8.21522	1.3476	2.16849	8.69515	2.4178	32.9292	57.1948	0.427068	0	4.59576	32.0909	7.23963	11.97	36.431	0.83525	36.3916	4.82874	5.03655	49.2607	32.5453	51.2727	28.3453	4.08907	91.9164	26.8945	74.4122	113.355	46.8467	154.917	76.2445	18.4494
Bacterial secretion system	g__Bacteroides	199.656	2.8733	93.592	1.75732	79.4133	1.28661	40.2403	589.365	0	547.193	619.047	339.74	28.2095	9.03999	45.6037	61.9901	1.17387	36.393	130.986	839.762	9.64186	327.812	39.6379	21.6081	36.109	80.4837	7.49699	653.53	69.8014	154.973	93.1986	541.024	122.715	462.213	7.22303	25.2434	9.06771	145.259	49.9882	83.8696	16.9267	266.071	238.679
Bacterial secretion system	g__Bilophila	320.226	4.60846	354.768	6.66128	205.703	0	0	354.736	0.553111	528.918	129.745	206.545	1378.56	5.37681	1.43385	120.752	106.79	38.6789	1103.58	426.715	2.32903	97.7132	160.87	530.237	719.331	869.835	41.2774	341.646	243.377	88.1975	754.078	176.3	583.073	390.438	83.4677	399.305	570.598	226.682	448.406	427.613	245.783	141.819	649.242
Bacterial secretion system	g__Bradyrhizobium	56.7679	0.816962	5.99498	0.112564	6.28973	82.548	284.188	0.0782893	96.6875	0.0933478	0.788499	2.78287	1.5463	2.04758	34.2452	1.31317	17.586	4.42624	0.70438	3.16234	1149	5.79612	0.268495	1.34959	0	0.54733	0	0	1.30285	0.867181	0	2.2631	3.16093	0	0	0	27.4359	4.96346	0	3.22657	2.01479	15.0749	1.23925
Bacterial secretion system	g__Breznakia	607.583	8.74388	10.4779	0.196738	1424.28	41.2205	3334.64	1.82159	58.8611	332.37	261.937	534.35	322.997	1385.66	3.86001	517.358	1471.37	1285.68	1.62772	472.124	0.800389	2004.22	1287.87	431.411	8.96323	140.286	558.507	25.8624	258.836	1050.28	295.404	80.2803	484.018	150.602	25.5907	0.195103	27.423	0	0	0.606788	19.0461	4.23138	17.2083
Bacterial secretion system	g__Burkholderia	31.197	0.448964	43.0671	0.808647	17.4275	0	0	44.5647	0	90.0831	11.5045	26.2136	121.569	1.07322	0.397094	10.1561	16.1885	1.26645	88.8106	48.3205	0	11.7043	3.36478	65.3075	72.4127	75.7431	3.86895	23.2705	25.3559	10.4341	58.2188	24.6912	51.3903	32.573	8.2998	53.0745	56.2502	30.7887	40.0336	43.4135	31.4546	29.8803	94.4091
Bacterial secretion system	g__Candidatus_Avidesulfovibrio	54.1144	0.778774	42.9323	0.806114	29.7075	0	0	78.9843	0	57.3654	24.5107	42.8225	271.733	0.934649	1.25592	24.4047	27.8432	3.66041	167.633	94.874	0	18.22	8.26826	85.9213	114.199	168.758	5.44528	35.5042	42.1704	17.8435	115.623	34.815	98.6564	52.2777	4.78311	49.7161	114.799	61.3902	2.83187	3.40844	48.609	6.38215	94.4707
Bacterial secretion system	g__Candidatus_Faecisoma	74.3396	1.06984	1.81214	0.0340255	114.576	0	0	641.321	0	189.979	16.218	222.465	61.1235	19.5216	0.848895	31.7531	11.894	35.663	10.5832	189.887	0	19.3333	0.228915	21.2109	39.7046	35.3233	76.3479	29.5556	30.4446	0.218488	4.46431	300.73	2.77428	124.019	0	0	0	11.7123	0	0	4.59694	0	0
Bacterial secretion system	g__Candidatus_Fimihabitans	61.9015	0.89084	4.0621	0.0762717	95.7674	0.364876	0	599.059	0	166.811	66.8309	94.0295	37.8024	37.0526	0	27.5712	4.84626	51.4834	4.99846	154.143	0	23.3511	0.122321	5.72083	25.6814	20.8627	59.6133	32.9866	22.2587	0.379933	3.51953	216.215	1.13989	104.433	0	0	0	19.5101	0	0	6.05114	0	10.9976
Bacterial secretion system	g__Christensenella	123.114	1.77177	36.1377	0.678537	34.9084	0.169738	0	20.3872	0	51.2559	59.9681	124.298	265.874	11.6858	4.17098	46.1634	35.9013	43.5369	108.959	9.69832	0	23.4458	89.4626	798.642	598.897	496.582	76.1798	32.0065	148.853	9.685	235.199	103.271	39.701	224.528	18.3138	6.23556	67.6975	46.3378	21.6268	57.9665	25.1474	23.0894	58.8247
Bacterial secretion system	g__Clostridium	360.639	5.19004	211.884	3.97841	524.359	282.676	4.00998	692.454	0.289725	323.854	479.424	809.481	517.783	95.5424	106.889	581.571	1112.52	283.376	234.588	234.635	42.1102	224.697	104.927	453.576	765.391	475.551	176.283	347.349	386.95	11.4522	174.086	520.174	364.4	488.758	25.2909	211.799	174.037	254.474	312.588	203.166	364.789	137.611	223.197
Bacterial secretion system	g__Coprobacillus	42.6927	0.614402	47.1004	0.884377	11.6795	0	0	78.9493	0	44.599	235.538	9.47227	13.8386	269.261	0	178.256	0	21.8103	1.86132	200.864	0	8.59274	3.61538	9.0003	1.9966	0.959595	0.124178	3.02597	8.2677	12.5329	3.32562	61.1315	34.0241	68.0555	9.68542	39.1215	121.958	95.9569	4.47922	34.9599	82.8757	18.7804	16.0868
Bacterial secretion system	g__Desulfomicrobium	23.8112	0.342673	36.9834	0.694415	19.0135	0	0	26.3451	2.01966	55.5793	9.62123	13.2781	53.142	0.50179	0	8.33393	4.95515	2.40903	109.294	25.2189	0	10.1246	18.2366	39.6387	52.4046	55.0808	1.96111	35.5212	15.9886	4.04309	53.1717	13.4853	45.8007	39.1668	7.72741	51.9861	72.8999	26.6424	28.1953	24.0822	29.2786	25.2007	66.8377
Bacterial secretion system	g__Desulfovibrio	354.071	5.09553	465.107	8.73305	227.373	3.61173	0	281.209	0	1501.42	131.335	307.939	808.42	3.66139	3.01351	108.134	233.068	40.8601	1510.22	403.207	0.877138	114.978	392.109	449.121	686.273	500.288	27.1777	510.794	194.383	67.1098	855.825	259.548	604.351	395.835	351.293	576.274	182.197	78.1147	349.006	404.316	89.0975	1509.43	646.236
Bacterial secretion system	g__Dielma	81.2101	1.16872	2.76216	0.0518634	178.671	8.56045	394.07	2.90331	7.53464	48.9509	40.3862	65.1805	43.2327	191.92	1.87112	82.6458	207.776	190.87	1.18435	61.5644	0	263.145	153.426	56.9807	6.01554	16.0547	79.81	3.79263	27.4389	143.738	35.6981	17.2174	74.2866	31.3761	0.761091	3.37172	5.91763	1.61714	1.17946	3.69771	3.75061	0.518428	4.04561
Bacterial secretion system	g__Eubacterium	24.8358	0.357418	32.0816	0.602377	27.4845	1.74035	0	37.2053	0	28.9739	20.5592	36.5048	24.7362	9.84742	2.30557	19.5423	4.51213	14.2879	29.7387	12.6286	2.97819	12.5242	11.8056	57.9671	11.0835	68.3787	6.01875	18.6286	95.8595	18.3864	17.5273	31.2062	28.7722	93.8704	7.97882	16.2851	22.1587	73.4868	17.9704	42.8097	27.9129	68.0598	12.0719
Bacterial secretion system	g__Faecalicatena	29.5784	0.42567	34.7654	0.652769	28.7171	2.49108	2.6435	26.5039	0	15.799	17.8739	74.3921	20.5682	13.5077	8.17396	28.8378	12.4796	26.5964	50.1444	3.2892	0.514306	10.2445	35.0623	55.0456	44.2336	40.6466	10.3289	31.4313	24.4546	5.11402	42.934	104.026	52.0153	99.2823	6.26219	36.111	14.33	24.9626	82.8284	51.8214	41.6029	42.1933	12.7765
Bacterial secretion system	g__Holdemania	62.8211	0.904074	12.6544	0.237604	24.1673	0	0	17.4811	0	12.2406	486.526	84.0051	201.908	0.807465	17.9703	171.585	10.2251	0.997509	6.84845	3.1004	0	30.4969	29.0215	16.5784	111.785	24.2183	0.777175	9.29987	103.166	120.322	16.7316	121.702	226.22	36.4513	4.93607	10.1545	10.8352	12.6954	1.44539	18.0552	20.5326	9.85568	25.3791
Bacterial secretion system	g__Hydrogenoanaerobacterium	21.4797	0.30912	81.3243	1.52698	18.9566	1.26953	0	43.2946	0	31.2968	12.4597	41.5076	29.1824	2.62056	2.10061	24.7728	6.03617	14.8877	54.7376	25.2681	1.20435	3.3515	20.1985	29.3726	33.9733	66.4518	6.79238	23.1873	29.4911	0.486739	26.3312	21.411	29.33	44.4189	9.20788	56.4813	131.011	80.4682	52.7106	135.623	115.951	51.4865	98.98
Bacterial secretion system	g__Intestinimonas	18.181	0.261647	34.9527	0.656286	17.6331	0	0	15.9063	0	25.0847	34.8105	22.5835	26.7357	0.622987	0.967395	25.6102	3.03593	4.15879	10.5045	9.64344	0	5.02197	7.31378	84.8271	49.4196	47.9838	1.92252	12.8722	36.7476	6.10244	27.2103	16.4914	30.8181	21.4017	1.41289	33.8582	16.7139	19.3544	81.0534	15.2445	29.5441	33.7915	83.6014
Bacterial secretion system	g__Kineothrix	17.0735	0.245709	105.363	1.97833	23.5297	0	0	38.3663	0	5.89763	0.795659	34.1402	4.10746	7.46114	1.39163	7.3813	0.791671	2.34417	74.1925	36.7865	0	6.21322	24.6298	3.20883	9.32643	33.5458	3.62507	29.7548	35.0828	0	29.3066	24.3987	4.51271	71.4146	39.6484	70.3369	4.26966	22.2532	281.435	199.377	31.3449	104.044	195.555
Bacterial secretion system	g__Lachnoclostridium	30.4087	0.437619	84.6771	1.58993	25.62	2.1669	0	25.3717	0	27.4247	16.2662	52.5752	25.7432	23.2569	16.5935	50.1638	28.3095	25.7674	93.9573	15.0537	6.7722	4.94968	33.6552	33.1181	37.8876	34.7577	6.49608	34.2915	26.6385	4.34226	33.9007	75.7662	63.0562	88.3587	10.7865	27.0865	71.962	143.617	134.125	56.33	155.715	62.6335	99.8382
Bacterial secretion system	g__Ligaoa	3.54525	0.0510206	51.1486	0.960387	5.88633	0	0	10.2366	0	6.97276	3.74712	8.75122	2.30909	0.949765	0	1.97687	0.187779	3.27518	13.3126	2.84009	1.21195	0	4.41307	2.33802	3.00401	1.21409	2.33376	2.81313	3.39383	0.338723	1.77556	1.29972	13.4641	8.31212	7.87582	24.0923	128.016	61.9683	16.9651	101.433	45.1375	16.4732	58.3768
Bacterial secretion system	g__Mailhella	103.308	1.48673	86.943	1.63248	56.387	0	0	134.389	0	138.788	34.8182	71.2724	110.454	5.52825	3.22969	64.7635	73.927	32.4761	304.123	301.767	4.71991	18.5607	74.1273	326.724	285.877	220.386	41.1153	100.678	40.8957	3.44466	339.641	49.9886	99.6418	161.512	27.5773	86.4569	100.859	46.8659	34.0099	29.9427	114.941	65.1919	276.642
Bacterial secretion system	g__Methanobrevibacter	15.9532	0.229586	265.018	4.97608	0	0	0	0	0	0	0	0	0	0	0	0	0	0	0	0	0	0	478.596	0	0	0	0	0	0	0	0	0	0	0	1837.84	318.862	0	0	0	0	25.476	189.439	13.5406
Bacterial secretion system	g__Methyloceanibacter	92.4056	1.32983	2.35075	0.0441387	2.85048	898.569	18.6136	4.34306	697.884	0.356846	6.70274	6.91964	12.5737	14.599	443.254	9.82139	34.9282	6.87051	6.81245	14.6839	490.859	32.1928	6.22069	14.7303	3.37977	13.1588	1.22154	0.815526	9.43619	6.4542	0	5.36248	8.17739	0.376716	0.194343	0	13.4776	1.22729	0.168877	0.412784	1.16187	4.30373	0.210249
Bacterial secretion system	g__Mucinivorans	47.4572	0.682968	14.5408	0.273024	10.3082	0	0	23.8632	0	115.968	56.6337	74.5887	15.9485	0.564911	10.9834	28.0679	1.38825	12.2937	311.147	28.7271	1.77888	94.2033	7.12442	11.2351	15.2325	85.221	2.25748	172.519	29.3665	16.5153	134.643	38.6618	103.828	20.6457	0	0.803593	0.182807	0	0.221237	0	1.05394	1.05426	127.551
Bacterial secretion system	g__Mucispirillum	24.5891	0.353868	95.0521	1.78474	10.1849	0	0	3.44907	0	53.4542	1.44714	78.3777	0	2.99116	0	13.9424	6.99991	38.712	0	9.15649	0	31.9399	175.73	0.454826	0	50.3327	6.06412	63.5092	69.5319	57.2666	10.8868	4.17755	37.5284	11.5359	66.4761	18.8272	0.139794	3.06692	42.0626	0.267767	1.95531	721.511	1.16232
Bacterial secretion system	g__Mycobacterium	54.8651	0.789577	1.404	0.0263622	2.68921	549.855	75.2647	0.652472	334.827	0	14.6256	9.36021	27.3517	19.6115	223.584	10.4715	51.848	1.90886	11.883	15.9813	180.505	42.8858	6.31966	21.4428	1.89905	7.88655	0	0	11.1224	8.80444	0.293762	9.75681	3.91247	1.2095	0	0	1.97456	1.4543	0.214757	2.28387	0.65766	5.58588	0.464994
Bacterial secretion system	g__Nitratidesulfovibrio	42.6845	0.614283	55.6018	1.044	32.7441	0.676707	0	35.2451	0	162.723	21.3092	33.5825	78.0051	0.124124	0.541492	13.8697	21.3181	6.93882	177.863	62.2334	0	12.7468	50.6242	45.8751	68.2945	78.4839	2.78548	57.0368	19.575	11.3159	85.8493	35.934	102.217	62.6223	33.819	59.3624	46.2165	15.113	42.7678	45.5326	29.5717	163.112	64.9212
Bacterial secretion system	g__Oscillibacter	27.0727	0.38961	42.1435	0.791304	16.0868	0.934186	0	32.6345	0	30.2882	19.4005	40.5225	16.6878	35.0943	10.7629	37.0442	18.7014	50.8079	28.1433	14.7752	0.787268	13.5128	30.3109	34.1175	45.0948	33.1732	24.6463	23.4222	25.4966	1.8569	44.5271	76.4245	53.9114	53.0149	1.82138	42.7968	40.1256	44.7341	35.2465	27.7375	68.4049	59.3058	59.1189
Bacterial secretion system	g__Paludihabitans	26.2722	0.37809	46.2403	0.868227	17.3063	0	0	3.66853	0	15.2659	8.10063	34.7737	36.0874	5.9842	1.82211	4.76719	0	7.03055	73.7224	2.16777	0	4.9348	20.8127	22.6898	74.3518	217.456	0.928795	47.6474	95.5707	3.36132	58.7822	10.1054	5.83266	14.9964	0.155308	59.0622	2.86247	14.2813	106.143	29.7944	124.282	27.5691	52.0123
Bacterial secretion system	g__Parabacteroides	73.2763	1.05454	54.0161	1.01423	19.7308	0.331777	0	98.2537	2.48336	203.8	56.66	75.9969	14.5681	1.17081	5.81411	20.9834	37.8158	24.9165	100.958	98.7217	13.7209	171.877	36.0684	42.3801	41.5116	65.0476	3.03773	127.503	47.9856	454.605	96.6698	95.0621	192.671	47.9437	0	0.259554	9.89447	173.264	0.690895	24.5458	10.7455	189.744	77.0013
Bacterial secretion system	g__Photobacterium	95.8073	1.37879	0	0	1017.1	65.7734	0	22.6772	0.44985	133.573	39.0645	186.52	4.45102	0.230191	0	602.156	2.01149	50.0727	5.11443	32.5832	0	7.33851	0	0.0714606	0	0	85.9809	0	12.6414	0.939927	0	84.3354	508.601	12.5354	0	0	0	0	0	0	0	0	0
Bacterial secretion system	g__Plesiomonas	123.835	1.78215	0.263702	0.00495139	1.82749	0	0	0	0	0	0	5.83784	300.122	0	36.9715	1.46432	0	0	262.306	0	0	0.617281	11.8345	57.7976	58.7024	35.9129	0.113016	2640.2	25.695	0	270.215	0	5.44576	0	0	0.234575	0	0	1.38358	0	0	0.755167	0
Bacterial secretion system	g__Proteocatella	55.2874	0.795655	0	0	48.6661	1.75429	0	5.4365	1.57351	17.6689	45.6655	48.4357	20.9791	531.629	28.7915	7.80681	8.64131	262.337	0	0	0	6.69572	18.5772	23.5994	18.617	1.09286	62.9603	4.06864	39.7002	0	0.780442	289.377	158.893	4.87492	0	0	0	0	0	0	0	0	0
Bacterial secretion system	g__Pseudomonas	84.2906	1.21305	6.01343	0.112911	0.394224	0	1.37523	2.38916	0	6.93628	1.11176	1.36346	0	0	1.4683	2.00195	0	7.93754	5.93169	0	1.61158	0	0.751036	0.084227	1.33605	0	0.293248	2.53529	0.0992622	2481.55	3.07732	3.49547	2.91256	0.0660414	8.00203	2.05393	0	0.732653	2.60628	10.1575	1.17217	0	29.3964
Bacterial secretion system	g__Rikenella	50.2331	0.722918	3.94224	0.0740211	13.0251	0.462846	0	22.6951	0	158.693	61.9277	87.8111	18.8905	1.37578	1.50589	46.8686	1.35927	16.238	207.812	50.128	0	123.671	10.9479	13.3039	15.5682	97.7269	4.53585	219.075	26.0931	25.2423	134.184	39.4698	84.918	23.466	0	0	0	0.210176	0	0	1.63547	0.70396	32.9305
Bacterial secretion system	g__Ruminococcus	26.8009	0.385699	34.6065	0.649786	21.5718	0	0	11.0664	0	35.7061	21.0066	40.0242	49.5859	5.31857	3.28681	33.1813	12.746	17.0199	14.6376	17.8522	2.35697	5.7539	8.28337	44.4838	63.7616	43.0593	5.26481	24.0086	114.769	2.13365	26.893	54.9375	73.7271	51.592	6.16409	41.6605	19.0599	47.4229	106.524	8.69921	24.4436	25.4671	32.0171
Bacterial secretion system	g__Ruthenibacterium	86.5376	1.24539	115.906	2.17631	45.553	24.7037	0	38.931	0	36.0241	30.8187	107.535	123.595	54.9652	34.3553	157.549	80.5226	151.866	471.056	61.1366	7.12393	47.2172	39.7953	139.47	108.671	281.136	29.7563	29.6894	82.4701	4.40924	74.0412	106.975	87.6839	139.081	17.1861	77.1398	183.006	106.765	74.9771	68.6674	214.016	121.345	180.056
Bacterial secretion system	g__Thomasclavelia	8.4918	0.122208	52.422	0.984298	4.39445	0	0	1.43435	0	2.2797	35.7337	0.232329	0.965599	39.7912	0	36.0064	0	26.9746	1.07249	5.16014	0	0.460039	0	2.39926	0.36523	1.19326	2.59971	2.74458	4.10357	4.77993	0	9.23959	45.6629	27.1608	0.810269	116.918	167.618	57.9436	16.7871	15.3649	60.8074	34.8877	0.660479
Bacterial secretion system	g__Vibrio	245.948	3.5395	0	0	990.374	171.378	0	194.293	878.127	34.9198	233.841	484.981	5.52084	5.78351	0	1787.39	0.316512	495.569	12.9854	255.037	0	106.127	1.32689	1.25027	0	0.186008	103.768	4.58367	21.6234	1229.25	3.33024	208.735	97.1456	50.601	0	0	0	0	0	0	0	0	0
Bacterial secretion system	g__unclassified_p__Bacillota	25.1087	0.361345	315.345	5.92105	0	0	0	0	0	0	0	0	0	0	0	0	0	0	0	0	0	0	753.26	0	0	0	0	0	0	0	0	0	0	0	2306	249.923	0	0	0	0	32.405	197.231	52.5469
Biotin metabolism	g__Akkermansia	14.758	0.334829	25.1507	0.753276	1.02355	0	0	0.368151	0	6.15234	1.76193	3.752	19.4325	0	0	1.78547	0	0.904196	3.94372	0.909417	0	4.0441	1.38698	0.848597	29.446	2.76719	0.531722	43.6954	286.357	0.760377	1.82958	4.09925	25.9409	1.00079	0	0.0937216	36.1152	7.55075	0.696631	0.873007	6.66307	0	174.364
Biotin metabolism	g__Alistipes	50.3535	1.14242	0.617552	0.018496	11.8836	0.957088	0	38.207	0	203.096	42.7279	80.069	21.3751	1.85941	4.46454	30.8927	0.693314	14.0038	95.7935	57.8749	0	101.649	8.74667	11.5382	12.9073	101.674	3.63127	184.171	31.9214	29.7705	121.778	63.8464	186.331	48.7409	0	0.0975515	0	0.298804	0	0	1.51058	3.4335	0.217534
Biotin metabolism	g__Anaerorhabdus	59.3109	1.34564	145.468	4.35685	18.588	2.88467	0	474.679	0	47.0228	139.425	3.94482	3.03456	302.098	145.9	86.5758	16.67	51.9937	2.00636	4.20823	2.41131	4.86343	1.6296	12.4572	3.81456	0	32.9769	26.6793	28.0846	45.7162	0	249.581	54.1141	17.9676	5.18027	21.728	569.12	259.743	0.116103	102.459	333.812	5.57794	11.4789
Biotin metabolism	g__Anaerotignum	14.5624	0.330392	31.1807	0.933877	15.8368	0	0	27.3395	0	10.2402	5.95181	61.6973	8.32283	12.9513	10.2426	13.1865	1.99216	31.1375	5.42262	1.84274	0	1.09095	7.31636	9.58556	4.5541	9.11852	24.2126	16.5177	22.1921	5.41654	5.86681	21.0683	15.9868	87.7827	16.7931	23.6776	10.103	3.24069	56.9742	34.2445	52.1587	52.1317	31.3026
Biotin metabolism	g__Anaerotruncus	19.7329	0.4477	55.5778	1.66458	14.0255	0	0	21.4798	0	20.5035	7.57244	41.3122	7.80084	0.70015	4.55954	15.9602	3.72657	9.5559	56.0195	4.72289	0	0	77.2722	11.6232	44.0734	49.1044	2.76895	22.1932	11.8708	1.51121	61.8101	21.6745	28.0536	52.0931	10.8069	60.9844	65.3852	39.9926	47.8266	74.8357	100.196	48.3472	51.8254
Biotin metabolism	g__Angelakisella	2.60778	0.0591651	75.0205	2.2469	4.29693	1.51313	0	0.901913	0	4.59558	1.57125	5.86061	0.707274	0	0	0.464464	0	2.88755	10.3594	0	0	2.32149	5.16103	1.47575	3.42888	6.81386	0	6.91601	1.15294	1.05281	3.76702	5.56472	4.27383	3.14689	22.1405	74.7408	21.6974	47.4184	170.485	153.013	69.5485	59.8369	56.3037
Biotin metabolism	g__Bacteroides	138.312	3.13802	101.837	3.05007	56.1369	0.387911	0	380.966	0	421.177	409.012	226.95	32.2604	25.3187	27.066	100.088	1.488	79.9695	90.6562	566.95	0	222.946	5.98928	11.093	13.6322	57.6939	12.5177	545.656	33.1962	73.0805	23.9369	373.154	95.5603	262.482	0.159395	21.0608	46.4771	223.61	10.9464	98.745	41.0033	176.77	297.761
Biotin metabolism	g__Bilophila	88.7753	2.01413	98.0939	2.93796	38.0733	0	0	85.0037	0	105.223	40.8617	55.0765	451.986	1.46186	0	30.2832	45.2787	3.25105	325.918	131.028	9.29484	22.0983	31.6159	139.123	196.114	282.047	7.27154	86.4861	61.6849	26.1084	205.513	40.6883	157.3	84.4716	53.9962	80.5232	144.76	52.3841	73.1959	112.622	47.591	132.927	184.846
Biotin metabolism	g__Bradyrhizobium	72.1684	1.63735	5.77638	0.173005	3.94237	33.8103	253.799	0.721118	47.854	0.337031	0	0.70844	0.666685	1.03703	31.7123	1.18046	9.89324	8.71685	0.665651	0.889333	1761.67	2.74589	0	0.752892	0	0.256951	0	0	0.901907	0.722582	0	0	2.06309	0	0	0	25.4492	4.24663	0.0906168	1.93069	2.59484	17.6754	0
Biotin metabolism	g__Breznakia	471.59	10.6994	23.567	0.705844	1036.99	22.2142	2257.65	10.4217	41.2213	238.886	586.893	515.738	398.123	873.539	17.6521	429.68	1076.39	779.444	6.87079	339.66	0	1504.53	918.732	324.877	108.042	117.779	407.729	28.1841	274.977	889.064	231.306	138.218	466.855	106.028	77.2025	0.19652	24.6603	0	8.61906	26.3384	51.131	1.89284	22.0625
Biotin metabolism	g__Candidatus_Avidesulfovibrio	44.8293	1.01708	19.8509	0.594543	21.112	0	0	63.3258	0	78.8436	20.6601	39.731	197.972	0.817375	1.97608	19.5016	18.1278	1.95598	150.703	74.242	0	15.0639	5.44049	53.5272	83.2594	162.961	3.33576	37.4781	22.9747	17.675	100.583	30.5844	85.2249	37.8024	2.20959	25.1738	39.2407	30.979	6.81808	6.65155	26.0076	0.369572	41.2079
Biotin metabolism	g__Candidatus_Avirikenella	48.6303	1.10332	0	0	10.524	0	0	49.0022	0	122.037	48.2305	57.5193	7.79144	1.17892	0	32.4761	1.3838	22.6141	114.073	50.0838	0	130.751	8.44907	7.87914	14.6262	73.2663	3.12469	225.912	10.526	13.1442	71.4854	68.1711	299.449	15.2089	0	0	0	0	0	0	0	0	0
Biotin metabolism	g__Candidatus_Methanorudis	0	0	72.7525	2.17897	0	0	0	0	0	0	0	0	0	0	0	0	0	0	0	0	0	0	0	0	0	0	0	0	0	0	0	0	0	0	520.949	82.8223	0	0	0	0	5.10159	45.4097	0.490059
Biotin metabolism	g__Candidatus_Stoquefichus	26.885	0.609967	14.5389	0.435448	4.37802	0	0	56.7935	0	25.4847	134.238	4.47697	7.32021	181.821	0	101.878	0	13.9736	0.760295	135.065	0	1.91659	0.760575	4.98059	0.840676	0	0.12692	1.6351	6.26609	9.10985	0	48.139	23.1362	43.4511	2.40352	17.6739	0	45.4608	1.29835	12.2504	31.0456	13.8472	6.87054
Biotin metabolism	g__Cetobacterium	45.7295	1.03751	0	0	310.353	0	0	1.19739	0	2.54137	1.80782	9.85412	111.484	0	0.684645	0.872959	14.7197	14.952	49.4404	0.752099	6.14093	32.1773	3.75452	11.5366	43.476	136.895	0	566.478	23.4808	0	24.7498	3.55022	0.98507	0	0	0	0	0	0	0	0	0	0
Biotin metabolism	g__Christensenella	67.8319	1.53897	26.883	0.805159	11.0286	0	0	0.439147	0	15.6716	4.3994	48.1685	179.916	0.521516	0	2.31796	13.6835	13.8479	68.8931	1.48105	3.50855	9.25747	30.3958	476.108	342.617	382.936	26.3055	18.4714	90.9049	0.959909	136.841	52.2797	8.44275	95.5623	6.88179	6.43823	41.5072	25.3154	22.8653	63.727	12.7618	9.85588	52.5943
Biotin metabolism	g__Clostridium	481.715	10.9291	232.552	6.96505	895.66	499.104	1063.49	347.136	17.617	324.254	410.919	698.746	606.616	435.675	85.7896	763.996	1960.29	393.435	290.669	290.782	34.5886	728.822	298.436	463.93	879.635	347.528	261.783	307.375	398.136	312.289	202.939	301.74	433.122	396.936	47.7893	192.478	133.475	227.502	369.377	200.447	407.842	283.61	230.446
Biotin metabolism	g__Desulfovibrio	181.104	4.10887	220.852	6.61464	105.593	6.78951	0	76.1325	0	1027.29	66.9846	151.648	343.623	28.1374	5.10108	50.5347	138.946	18.373	792.371	149.076	0	75.5071	238.381	218.042	306.222	192.729	7.40271	280.536	75.2703	40.1907	418.809	133.712	295.89	189.818	172.66	227.418	98.7888	55.4783	72.5231	143.221	45.6244	776.988	394.968
Biotin metabolism	g__Dorea	10.8802	0.246849	43.9779	1.31716	14.2728	0	0	19.1043	0	6.80361	8.32401	16.4213	18.0114	9.30445	39.1769	23.7481	4.1916	3.78127	2.60143	4.06829	1.44976	1.00482	8.80832	12.7148	11.8808	3.96969	1.99823	4.92405	41.6211	2.06646	8.86415	28.0916	4.06025	25.1413	13.5724	9.27389	74.5019	91.3163	107.368	22.6206	27.0562	36.5521	13.539
Biotin metabolism	g__Eisenbergiella	3.70017	0.0839493	40.1419	1.20227	2.51033	0	0	3.8527	0	4.54329	4.0233	10.8664	1.62608	0	2.17917	2.20338	1.83919	1.7555	10.7859	0.457263	0	0	7.81929	2.46878	6.95049	8.86771	0.157779	4.30133	4.58497	0.876155	4.66544	7.7765	4.38237	11.5119	17.7153	61.0827	14.6387	12.7464	86.6915	63.0944	43.1884	38.1957	23.9238
Biotin metabolism	g__Eubacterium	21.6728	0.491712	26.3647	0.789636	20.6314	45.0926	0	38.1384	0	22.4178	16.05	33.4525	23.0508	19.6198	9.8794	25.121	4.66702	27.2202	29.0058	17.8279	0	3.49432	21.1724	11.7743	14.003	18.8705	8.78299	13.0809	110.97	2.28352	14.2328	29.2791	8.49572	61.5704	7.66253	15.0315	5.73401	41.2174	39.4589	37.0115	23.6216	40.629	26.916
Biotin metabolism	g__Evtepia	24.8771	0.564411	15.4354	0.462297	31.9392	0	0	9.11982	0	18.0338	37.6224	64.0734	23.369	103.267	11.6433	18.647	14.7213	73.6497	8.76813	4.05097	6.67599	1.95573	11.9249	19.3006	20.8036	28.0508	18.7619	15.4311	21.4218	6.6576	21.9026	82.613	52.16	19.7491	2.12062	3.72351	14.6712	3.33792	37.9688	28.1485	11.6666	19.0919	18.1893
Biotin metabolism	g__Faecalicatena	12.5222	0.284104	62.8875	1.88351	12.9152	0.371943	0	5.55122	0	1.63466	17.8295	32.6797	0.784586	12.5222	16.4191	25.9108	6.38048	3.91093	1.38756	0.510407	0	0.647173	7.5072	7.14088	22.9196	2.65403	0.317875	8.88462	2.60867	3.9825	3.13802	81.2231	20.5919	75.243	20.7982	40.8055	55.1136	96.5536	163.664	90.3415	49.908	22.7007	26.1031
Biotin metabolism	g__Hespellia	1.50487	0.0341423	41.4054	1.24011	1.47912	0	0	0	0	0.0996537	0.251008	2.01594	4.27882	2.741	1.7265	0.110521	0.423428	0.156159	0.48031	0	0	0	1.5445	1.75257	2.29091	2.17325	0.388731	0.856076	7.58331	0.833844	2.18288	7.58566	3.23498	0.956782	13.9321	16.6426	38.7384	33.7771	129.575	58.3809	8.36388	59.5624	13.6757
Biotin metabolism	g__Hungatella	2.00229	0.0454279	33.0495	0.989848	1.45291	0	0	1.95694	0	1.97324	2.50755	8.21825	1.80526	0.257153	1.52304	1.15694	0.276394	1.42407	3.64226	0	0	1.00106	3.50079	0.97478	2.5919	7.65612	0.150688	1.24574	1.45618	0.484847	4.08492	2.32277	6.52362	1.88131	8.15227	18.7357	17.0227	27.4062	55.4157	56.1045	65.9627	16.7103	31.935
Biotin metabolism	g__Hyphomicrobium	50.6939	1.15014	0.946872	0.0283593	1.60211	345.531	5.75179	0.656305	581.199	0.563585	4.43238	0.783997	2.86163	14.8776	203.061	11.7385	45.5153	11.0339	5.44863	3.5903	228.871	20.0843	0.53161	5.11208	1.47691	2.18043	0.83714	0	4.68247	7.88996	0	5.10462	4.96541	0.435018	0.215042	0	7.67187	0	0.163669	0	0.471266	0	0
Biotin metabolism	g__Intestinimonas	10.7723	0.244401	32.4955	0.973255	3.79862	1.34748	0	10.2265	0	7.80646	17.165	18.1311	5.32823	0.359399	0.723451	16.1328	2.104	5.87325	38.9478	6.2543	0	2.9514	15.2559	4.74386	11.7249	40.8109	2.83423	6.03745	6.71028	2.05345	37.3304	26.1517	12.8917	19.4741	1.71255	49.5539	12.838	25.2806	37.9457	23.3839	33.4116	18.5502	89.7827
Biotin metabolism	g__Kineothrix	8.16735	0.1853	65.4286	1.95962	8.05146	0.914361	0	4.53583	0	0.771407	0.909371	11.0847	1.22236	7.4054	0	3.41003	0.357372	5.86697	45.6144	0.275179	0	0	29.3397	5.56408	6.97932	13.271	2.79073	7.88343	20.3505	0	29.2978	10.0577	2.29881	26.7686	18.9736	63.2155	6.83724	19.3267	113.528	166.667	26.1015	47.1978	127.011
Biotin metabolism	g__Lachnoclostridium	7.53668	0.170992	70.8734	2.12269	7.9787	0	0	8.44657	0	4.8575	3.43047	10.6704	10.0993	6.25324	17.3751	11.8356	2.86908	2.10629	4.34262	0.268518	0	0	3.51667	5.31868	16.9739	6.63717	2.02315	5.23936	38.328	1.03036	9.82403	23.1962	2.67205	20.8073	11.7996	23.0385	54.2774	99.3008	183.615	44.9183	86.6935	64.1378	70.0792
Biotin metabolism	g__Ligaoa	2.6042	0.0590839	50.2966	1.50641	6.17969	0	0	4.80195	0	5.79297	2.80374	6.90661	1.20973	0.106284	0	1.41171	0.49863	0.52561	7.21722	2.31696	0	1.655	4.25732	2.17621	2.01889	0.620177	0.490654	1.57351	2.11778	0.659832	1.89714	1.74668	13.187	5.95464	8.71138	31.2801	135.151	63.4152	19.3014	88.6284	45.2808	16.041	44.8608
Biotin metabolism	g__Longicatena	7.58109	0.171999	55.2389	1.65443	3.35845	0	0	0	0	0.765849	11.4134	0	1.77384	12.5633	0.808562	33.3521	0.314031	57.4972	0.44376	2.85791	0	0	0.457013	15.7105	0.997776	0.932591	3.76655	1.37133	0.18712	2.57072	0	11.0283	46.5235	18.739	3.70995	250.043	21.2766	78.8417	0.259811	36.667	29.3563	64.0745	12.9216
Biotin metabolism	g__Mailhella	19.9304	0.452181	40.0009	1.19805	10.1486	0	0	15.2032	0	12.306	9.09001	1.9899	12.1235	0.758932	0	12.1645	17.3214	1.63669	71.8476	80.0208	0	2.73277	17.7566	59.425	52.3648	38.1955	3.71003	29.0381	3.94296	0.338698	70.7002	6.48747	29.5451	39.0648	26.6372	24.7055	26.2676	5.91441	5.29287	20.8315	15.5742	155.376	79.4083
Biotin metabolism	g__Methyloceanibacter	68.4793	1.55366	1.21333	0.0363398	0.383497	756.363	2.77454	1.57111	563.193	0.304719	4.2719	2.7207	9.50081	12.5911	294.21	6.20781	20.3135	1.4873	2.84349	10.5834	312.473	11.2871	3.25616	7.37637	1.17383	6.70005	1.42007	0.244139	3.99732	7.8994	1.24217	2.3902	4.26582	1.334	0	0	9.71357	0.736001	0	0	0.47039	0	0
Biotin metabolism	g__Mucinivorans	44.7398	1.01506	22.7228	0.680558	9.61005	0.453134	0	20.3259	0	121.739	54.8087	77.2636	21.0504	0.31514	10.0353	32.8507	0.431563	10.2509	293.849	31.8121	0	109.777	6.17727	12.0275	13.3804	70.5117	3.09	180.112	29.8774	24.9389	98.7036	25.656	63.0876	20.0595	0	0	0.501067	0	0.137603	0	1.83648	4.12237	197.907
Biotin metabolism	g__Mycobacterium	71.8374	1.62984	0.84578	0.0253315	4.87162	746.118	127.315	0.751065	486.09	0	14.8972	9.08764	23.3313	28.569	251.57	15.6597	59.7633	7.10122	20.1482	16.1198	184.074	72.954	3.35568	21.3457	3.25004	9.9696	1.03281	0.40833	12.3683	16.8348	2.38994	8.1122	5.54492	2.08842	0	0	1.86436	0.512903	0.160835	0.425471	0.872433	1.84072	1.93531
Biotin metabolism	g__Mycolicibacterium	48.0403	1.08994	1.50565	0.045095	0.501102	400.619	66.6149	0.977996	511.654	0.222191	8.81086	5.0326	7.76018	19.1259	141.529	10.5823	50.5722	5.15037	6.98967	8.58962	82.5127	71.3108	0.810748	8.47599	1.32576	3.26681	0.24384	0	2.91848	12.7831	0.45887	3.57114	6.48199	2.31724	0	0	2.70032	1.70214	0.241253	1.11659	0.29576	2.83756	4.65724
Biotin metabolism	g__Nitratidesulfovibrio	29.6731	0.673223	16.2864	0.487787	11.3329	0	0	37.5656	0	119.434	12.6792	28.2533	55.3263	0	0	10.4968	28.3606	6.55172	116.343	28.5484	0	7.53131	37.2098	43.9468	62.2672	55.2385	3.29898	35.1845	15.8911	6.21992	61.251	23.87	48.7316	34.6608	2.30021	22.5713	44.4638	17.148	1.64791	1.08224	17.1734	2.63395	37.5571
Biotin metabolism	g__Nocardioides	12.9578	0.293986	22.6166	0.677379	1.89535	16.2456	115.942	2.95786	88.9815	0	0	0	0.273505	0	38.3514	0	21.2859	43.2932	1.35008	0.300615	52.5411	1.50159	0	2.49759	0.198373	0	0	0	0.657131	0.46098	0	0	0	0	1.97109	0.144934	104.083	11.1702	2.40499	9.96834	14.0646	51.5068	8.23524
Biotin metabolism	g__Oscillibacter	11.1545	0.253073	30.7763	0.921765	6.45005	0.738522	0	9.91783	0	5.9483	3.11689	31.21	10.1409	0	1.17949	8.81107	4.56034	14.0595	38.7797	1.77339	0	3.23326	10.501	6.87337	19.4267	34.8309	2.80283	11.6146	8.12219	2.47405	46.5919	28.1277	8.64259	14.7086	14.812	24.2332	5.0794	18.1685	44.8104	43.4804	38.2406	60.4022	27.7599
Biotin metabolism	g__Paenibacillus	0.918619	0.0208416	45.5885	1.3654	0.220211	0	0	0.58744	0	0.820542	0.888262	4.37966	2.34206	0	0	0.159209	0.613369	0.259639	1.16772	0.143131	0	0	1.84753	0.848887	4.3362	1.72671	0.271849	3.50469	0.193714	0.358654	1.12015	0.820651	0.432715	0.515573	11.5463	40.7342	12.3195	25.7896	100.381	44.4747	19.7124	99.7898	55.5492
Biotin metabolism	g__Paludihabitans	17.159	0.389304	17.983	0.5386	3.03285	0	0	2.56893	0	6.14626	1.53403	19.3259	41.2961	0.28255	0	1.33712	0	6.45713	21.4783	0.373098	0	1.58155	9.2068	107.084	77.8915	91.2253	6.48394	8.92051	44.3815	0.919784	33.6417	5.02831	3.02939	21.5451	0.136624	21.4976	2.34756	5.6376	28.4509	6.44422	71.0113	8.31975	18.0015
Biotin metabolism	g__Parabacteroides	34.4599	0.781824	39.3053	1.17721	6.96355	0.387911	0	10.2503	0	92.8625	17.4043	28.7333	0.959952	0.474775	2.44773	6.73661	0	11.4934	50.8288	61.744	0	70.2915	14.5551	27.756	6.79623	26.2741	0.833729	55.7828	4.96279	344.5	41.2688	52.8005	76.6724	20.0149	0	0.539035	0.640473	144.473	0.936413	17.0329	1.56131	144.931	43.6338
Biotin metabolism	g__Photobacterium	37.1935	0.843844	2.58003	0.0772733	421.043	25.6433	0	6.34434	0	53.0623	15.1891	69.2778	0.580048	0.284895	0	208.728	1.31416	25.9132	1.57652	13.0381	1.89722	2.56734	0.203406	0	0	0.209259	23.605	0.610347	7.49119	30.8845	2.38126	46.1056	154.034	3.82136	0.688298	0.153718	0	0.345428	5.20704	0	0.162444	16.3305	0.332894
Biotin metabolism	g__Pseudomonas	54.3682	1.2335	0.0897041	0.00268668	0	6.40052	0	0	28.8276	0	0.314806	0	0	0	2.22801	1.13193	1.96793	0	0	0	1.45525	0	0	0	0	0	0	0	0	1588.72	0	0	0	0	0	0	0.221884	0	0	0	0	0.585453	0
Biotin metabolism	g__Rikenella	32.5636	0.738802	1.64183	0.0491736	8.21601	0	0	13.3701	0	94.3768	49.5205	56.2221	13.1585	0.993793	3.73965	28.7706	0.563612	17.1254	82.2036	24.1037	0	86.5532	6.72374	10.2451	8.89746	83.9723	2.48632	153.113	14.3513	16.2269	116.334	19.7986	54.226	11.6176	0	0	0	0.183119	0	0	0.206427	1.19122	13.1957
Biotin metabolism	g__Ruminococcus	35.3081	0.80107	27.0379	0.809798	37.9636	0.586308	0	31.0049	0	39.2715	57.7355	72.2471	43.4833	15.2365	14.291	50.7865	24.3943	19.4879	16.9493	29.2494	4.21055	13.2341	18.2814	35.2966	48.7642	42.1474	19.1544	23.7358	81.2317	8.48935	30.346	92.5098	103.001	86.155	12.4776	15.3285	8.19252	9.37632	96.5593	27.0639	24.8943	30.7314	18.7171
Biotin metabolism	g__Ruthenibacterium	20.7612	0.471029	51.3776	1.53879	5.39924	4.73158	0	7.03991	0	7.24538	6.36307	21.1668	31.506	13.7092	1.58077	41.9464	17.9872	28.8138	168.269	18.588	1.09144	12.2972	7.46804	25.9524	19.7511	62.2287	5.58176	2.00515	11.8537	1.55437	13.2911	28.1197	17.3406	39.9551	3.31084	29.4768	70.7973	58.1305	27.0266	52.4867	90.7914	63.5394	66.8393
Biotin metabolism	g__Thomasclavelia	179.326	4.06854	81.677	2.44627	471.938	19.4826	1002.73	3.81808	22.5561	103.468	78.021	188.339	58.7	442.247	0	152.732	522.66	421.477	2.33154	129.156	0	594.293	220.528	87.7653	6.64729	35.3542	170.977	7.94897	43.2103	334.549	53.2875	23.8303	138.174	43.5654	1.46074	118.831	353.564	56.5971	17.7456	19.701	92.3892	73.5242	1.28015
Biotin metabolism	g__Vibrio	87.9499	1.9954	0.269878	0.00808298	363.905	56.6461	6.88184	72.7052	167.89	12.0038	86.1694	173.868	48.0836	1.49989	0	593.822	0.828362	144.976	6.18539	69.2807	0	29.7204	47.0422	13.5391	38.9181	21.6869	25.652	0.513492	30.9748	431.975	75.8517	70.9073	31.2446	15.7255	0	0	0	0	2.25169	0	0.177212	0	0
Biotin metabolism	g__unclassified_f__Nitrososphaeraceae	38.8534	0.881504	22.5044	0.674018	2.84709	115.582	3.89035	0.748315	383.524	0.448046	0.60995	2.7008	0	7.48294	156.218	0.548879	6.8214	0.957011	1.77953	6.99461	428.687	22.4564	0.489989	0.692043	0.179264	0.310362	0	0	11.3567	4.94682	0.319112	1.16444	3.35033	0.495936	4.64238	0.230576	123.627	17.2888	4.12195	7.08752	25.9941	12.443	7.10395
DNA replication	g__Akkermansia	15.1061	0.14796	68.2429	0.902835	0	0	0	0.174701	0	0.132739	0	1.85734	14.6617	0	0	0	0	0	3.78372	1.34436	0	3.93557	0.147931	0	38.2095	0.35777	0.140665	58.0954	329.748	0	0.475367	0	0	0.117989	0	0.247448	160.619	21.5007	0.83001	0.528162	18.9072	0	411.554
DNA replication	g__Alistipes	103.917	1.01783	2.95763	0.0391287	29.9843	0	0	64.7029	0	401.578	112.601	173.676	37.2579	3.17108	12.9338	67.9188	1.46788	32.5491	202.442	132.563	0	312.004	17.9494	20.3985	35.6596	153.346	10.4134	450.394	71.6938	65.706	265.635	90.5065	266.972	83.9752	0	0.69545	0	1.49051	7.73078	0	0.992698	3.64787	12.0614
DNA replication	g__Amedibacillus	14.2507	0.139581	64.368	0.85157	7.77812	0	0	0.243454	0	2.65885	20.1785	2.5024	6.59527	46.2999	2.4217	76.4881	3.02952	73.8036	1.02831	3.29002	0	0	2.647	3.92316	4.64821	7.55031	4.93187	2.879	2.28432	4.35605	0.146539	24.5294	87.3281	35.9793	25.169	322.18	9.74825	109.285	0.220368	28.1254	19.6315	54.9479	10.004
DNA replication	g__Amedibacterium	2.41417	0.023646	79.894	1.05698	1.34393	18.9554	0	0	0	0.108878	0.962726	2.33756	9.64078	0.173985	1.60984	1.84401	0.133933	0.621635	0.0907782	2.4261	0	0	1.19639	15.3622	3.07232	1.3982	0	1.09139	2.63722	0	0.335832	3.289	0	3.79295	37.074	235.976	64.6572	129.981	9.13905	75.1259	85.1929	43.0569	38.8432
DNA replication	g__Anaerorhabdus	280.883	2.75117	281.011	3.7177	86.9472	8.31442	0	1008.79	0	128.774	1457.83	213.846	451.351	861.626	512.392	585.394	71.0185	112.464	15.4583	17.2911	1.82211	88.5903	39.805	67.5063	254.402	58.9315	72.3857	63.8741	233.144	407.234	29.0304	793.297	672.933	112.055	18.2639	59.2983	985.919	575.378	2.0235	225.479	586.072	34.7356	41.9321
DNA replication	g__Anaerotignum	130.528	1.27848	186.653	2.46936	128.919	3.46234	0	272.086	0	100.124	102.813	343.71	57.0856	227.53	53.1101	202.019	44.4525	211.045	139.693	42.3621	10.5189	35.9476	70.2053	226.52	96.2042	134.258	101.906	102.138	107.992	48.3804	81.5992	332.592	191.383	447.77	54.2464	165.065	78.7758	135.079	634.734	150.565	131.391	151.615	178.403
DNA replication	g__Anaerotruncus	80.2795	0.786313	121.866	1.61225	47.5133	9.61832	0	93.0435	15.1057	90.2582	25.217	126.035	31.8852	7.46795	15.4061	75.6751	10.434	48.0828	235.698	18.611	0.838835	17.1628	333.68	44.9456	147.676	182.51	16.3375	100.835	48.3161	4.69579	230.177	57.5219	131.655	241.983	19.1163	138.675	47.8661	61.3741	167.577	191.808	216.652	153.925	99.8021
DNA replication	g__Angelakisella	24.8416	0.243316	89.5624	1.18489	31.3014	3.11418	0	11.0649	0	30.5371	17.6136	94.7367	8.93346	16.3088	2.66677	10.3763	6.59514	32.9706	92.4495	6.00871	0	9.09081	34.9541	10.9918	13.8312	51.2079	1.31796	53.1772	6.00618	4.2008	57.7926	39.583	62.0984	36.318	9.22842	162.037	4.36107	91.8017	165.401	48.7578	191.491	102.5	30.4837
DNA replication	g__Bacteroides	149.187	1.46124	54.9963	0.727586	48.2515	4.01684	0	418.752	0	362.907	416.107	194.229	19.9085	5.89935	449.671	35.5433	0	34.6979	112.144	565.872	4.44048	175.876	6.70534	39.2663	29.3144	105.296	11.0897	529.215	42.4767	96.8552	69.6463	348.888	46.1183	302.418	0	10.1303	3.39268	65.9834	24.296	40.1652	9.42525	200.998	140.576
DNA replication	g__Bilophila	161.648	1.58329	164.273	2.17329	93.5416	14.8657	0	179.428	1.05203	178.571	69.7438	117.252	821.1	2.99162	2.5108	71.4843	78.7444	16.9727	502.481	297.918	9.16787	82.933	56.2349	256.275	320.459	469.029	24.7419	179.367	131.422	54.7961	355.337	72.7245	251.157	137.137	38.2364	167.921	301.182	136.339	179.494	158.493	145.211	24.6029	326.979
DNA replication	g__Breznakia	714.721	7.00048	25.8606	0.342128	1610.65	41.5934	3626.31	2.37916	60.1534	385.858	310.152	638.125	358.65	1696.65	11.15	641.653	1723.47	1683.45	3.89907	565.571	0.374816	2333.1	1460.19	504.324	11.8335	154.454	705.609	28.9734	284.287	1251.27	352.847	109.485	663.653	221.518	37.274	70.8512	50.5853	21.1538	0	1.24075	22.5886	0.0972052	28.9543
DNA replication	g__Candidatus_Faecisoma	77.3776	0.75789	4.35259	0.0575835	110.716	0	0	492.605	0	150.61	24.9336	239.547	88.1075	39.3942	3.09902	53.1411	19.0938	57.2896	13.8666	213.308	0	20.6847	1.45343	24.6605	49.613	58.4057	68.9181	41.562	46.9711	0.209473	4.72517	358.002	6.13483	134.275	5.02847	1.31438	0	25.2957	0	0	2.95741	0.821659	3.7557
DNA replication	g__Candidatus_Methanobinarius	58.463	0.572627	19.2129	0.254181	0	0	0	0	0	0	0	0	0	0	0	0	0	0	0	0	0	0	1753.89	0	0	0	0	0	0	0	0	0	0	0	120.274	0	0	0	0	0	12.9907	0	39.6515
DNA replication	g__Candidatus_Methanorudis	0	0	119.064	1.57518	0	0	0	0	0	0	0	0	0	0	0	0	0	0	0	0	0	0	0	0	0	0	0	0	0	0	0	0	0	0	814.774	154.541	0	0	0	0	8.9874	91.4655	1.8092
DNA replication	g__Candidatus_Pelethosoma	80.5659	0.789118	7.84766	0.103822	134.77	0	0	837.915	0	222.245	20.7295	138.712	97.4767	22.9066	0.477787	40.8847	4.19579	30.6356	8.12583	173.526	0	20.0903	0.187759	10.4551	54.9288	37.9616	85.0618	34.277	38.4992	0.468561	7.52946	259.299	1.71319	133.904	0	0	0	44.7414	0	0.554602	7.75535	0	17.5775
DNA replication	g__Candidatus_Stoquefichus	39.731	0.389153	42.8142	0.56642	7.3249	0	0	80.786	0	38.9997	186.358	7.78967	10.4767	266.939	0	163.604	0	23.6767	1.85878	195.059	0	3.51303	0.764036	16.6511	1.12432	0.0383642	0.132348	2.65691	7.15186	11.3112	1.84627	59.4607	38.8996	65.5072	2.56199	54.5758	0	144.571	7.50716	27.8324	98.5524	19.1963	30.5308
DNA replication	g__Christensenella	132.002	1.29292	44.1077	0.583533	21.0695	0.136545	0	15.6353	0	41.962	29.3494	99.2469	287.787	4.90034	3.25509	21.5883	28.0475	28.0398	135.882	9.33261	0	8.33445	68.9239	914.813	650.307	718.872	43.3515	25.9409	170.527	3.70598	279.092	98.6726	24.9125	226.375	15.5505	1.75214	84.7365	67.0697	5.96807	95.3551	31.3103	9.58879	85.6384
DNA replication	g__Clostridium	864.295	8.4655	296.187	3.91847	1072.13	1470.08	12.6121	1054.51	18.6903	560.299	1468.45	1487.87	1308.06	617.78	1381.88	1249.38	2108.92	500.878	369.009	1803.72	335.984	611.455	180.238	886.754	1577.72	640.148	306.956	742.854	718.17	382.837	311.717	928.705	736.675	1084.35	39.3211	130.703	253.901	408.475	434.628	272.863	639.896	185.213	300.684
DNA replication	g__Coprobacillus	52.46	0.513829	44.0422	0.582667	8.71129	0	0	86.2823	0	50.2174	269.084	11.4427	16.2194	350.124	0	249.437	0.858108	29.5657	0.942111	211.981	0	17.1907	7.42321	10.2743	4.48069	2.34164	0.979162	4.56981	10.212	20.145	5.46437	75.6849	50.6091	79.5596	2.9001	41.5744	3.29243	123.425	7.46054	26.9342	123.77	24.5196	42.5045
DNA replication	g__Cucumispora	91.9848	0.900962	0	0	0	0	0	0	0	0	0	0	6.02807	0	9.10021	0	0	0.511067	0	0	0	0	13.6974	0	0	0	1696.65	0	1033.55	0	0	0	0	0	0	0	0	0	0	0	0	0	0
DNA replication	g__Desulfovibrio	241.113	2.36163	210.572	2.78581	139.331	2.01276	0	188.364	3.81755	1183.75	97.2172	178.359	391.786	31.7489	6.72894	58.6601	175.765	52.0481	868.622	363.129	4.46313	85.8543	290.687	350.592	447.026	269.741	58.0672	298.512	148.223	48.9496	575.663	167.535	360.046	386.693	156.598	229.748	77.0485	33.6144	123.927	154.403	69.9456	656.908	392.959
DNA replication	g__Duncaniella	77.1406	0.755568	5.76088	0.0762148	0.843081	33.2342	0	0	5.3381	36.4854	248.693	34.7214	0	57.4674	0	3.06276	1.2508	6.8324	0	282.374	1335.65	208.656	0	0	0	0	45.328	0	0	0.516268	0	0.739192	2.28388	10.7397	0	0.90854	1.81252	1.53123	0	6.13697	19.7391	0	21.7195
DNA replication	g__Erysipelothrix	231.969	2.27207	1.05847	0.0140033	212.852	192.071	492.885	0.692393	18.0273	52.8306	569.527	85.803	53.6614	680.013	0	75.3401	357.163	172.4	1.63057	2220.43	7.43587	428.291	158.657	94.9377	7.8974	21.6788	92.7255	9.81144	37.6106	612.053	67.6818	15.2667	71.3796	148.322	5.19173	0	0	0	0	2.10416	0	0	2.23034
DNA replication	g__Eubacterium	32.7052	0.320338	59.7717	0.790762	37.7376	3.74801	0	33.3375	0	32.2298	12.4487	46.6884	24.425	13.4744	7.29517	27.7273	32.0477	26.7871	31.903	25.6477	1.03733	7.01452	20.4556	100.857	31.4212	124.627	10.1661	40.0129	96.5635	2.6781	25.4118	31.6201	56.6562	77.137	13.2954	42.594	21.9433	78.8676	70.1108	112.453	56.1438	99.3184	43.2184
DNA replication	g__Hafnia	0	0	440.715	5.83054	0	0	0	0	0	0	0	0	0	0	0	0	0	0	0	0	0	0	0	0	0	0	0	0	0	0	0	0	0	0	0	0	0	0	0	3965.33	0	1.10369	0
DNA replication	g__Hungatella	28.8484	0.282561	92.9772	1.23006	20.5314	0.42552	0	20.2044	0	13.6334	20.3089	49.8752	21.1983	42.8588	3.161	36.2026	13.1794	27.5203	76.6106	11.3434	0	3.31273	15.0544	79.6934	32.4091	97.74	29.0227	17.0838	31.3084	3.75868	19.3634	59.262	34.8375	85.5519	15.7546	38.4305	91.1323	134.169	138.464	51.2956	218.154	60.8299	88.5648
DNA replication	g__Hydrogenoanaerobacterium	10.8714	0.106482	90.7311	1.20035	14.0941	0	0	20.2153	0	23.6026	8.29819	22.7909	9.41834	1.21679	0.87167	6.67923	2.20745	6.14686	23.1116	4.52182	0.616672	0.593961	14.7569	7.06515	14.1604	26.8067	5.22402	21.7397	16.2653	1.8708	13.5267	6.89494	35.3446	18.1016	8.95715	37.0664	205.537	117.207	39.8638	183.476	101.941	28.007	94.5236
DNA replication	g__Hyphomicrobium	76.7974	0.752206	0.707582	0.00936111	0.908681	498.011	12.3349	1.2185	773.418	0.96975	6.92538	4.42883	7.97151	20.8678	218.779	18.8303	75.266	11.1427	9.1083	11.8644	546.149	34.6377	2.70851	8.42392	0.972941	5.20165	0	0	6.14887	15.7889	0.410883	5.52835	5.43819	0.467387	0	0	3.83203	0.230285	0.196576	0.205508	0.229333	1.67451	0
DNA replication	g__Intestinimonas	18.978	0.185884	80.0177	1.05861	22.2743	0	0	17.7881	0	23.6579	55.5839	57.2391	20.4905	3.39007	0.479068	32.3869	3.77265	0	14.5025	16.0132	0	6.44498	6.06739	10.6008	45.8554	78.5165	3.47991	26.3846	22.1494	6.93814	20.9066	25.1028	31.4781	17.8382	1.43738	99.095	17.9899	32.5183	162.24	38.4321	75.7332	111.704	181.01
DNA replication	g__Kineothrix	34.8762	0.341602	244.569	3.23557	41.5077	0	0	81.5429	0	12.8163	1.86453	52.7071	10.0998	23.6477	3.55086	11.7359	1.46262	12.0537	137.323	75.9663	3.48322	1.41995	85.1749	9.85206	27.5664	75.3832	5.61468	56.0374	63.7939	0.263118	76.1337	48.688	7.24096	119.357	78.5963	179.786	18.1802	47.9133	602.02	465.55	152.706	250.247	406.12
DNA replication	g__Lachnoclostridium	20.9029	0.204738	156.774	2.07408	16.3789	0.604567	0	26.1401	0.737481	8.44836	13.7171	37.444	25.8099	24.9419	88.2265	56.2339	11.1753	5.44315	21.32	5.02315	10.6017	1.79832	8.89594	14.2703	16.8241	17.2863	2.98729	15.2072	39.0248	3.92923	11.951	40.2816	9.46015	92.9249	33.1399	33.9386	219.595	339.145	195.028	117.439	232.388	100.698	139.598
DNA replication	g__Massilicoli	64.2732	0.629536	20.1505	0.266586	170.043	1.72598	320.784	0	8.20344	41.2083	20.7984	66.0963	43.6593	130.376	0	32.7793	172.086	120.583	0.0799615	61.6958	0	213.225	137.125	75.0728	1.9631	16.646	65.5492	1.56347	35.6401	126.675	33.4183	3.1099	21.0588	7.02817	8.16012	105.043	5.99907	33.7779	2.25591	5.94905	17.8306	0.63113	1.7076
DNA replication	g__Methanobrevibacter	116.289	1.13901	523.33	6.92351	42.4908	241.317	0	2.55539	0.908093	111.573	94.1597	55.9071	0.690869	32.3159	0	65.9059	2.75363	329.04	0	64.02	1204.89	529.096	584.965	20.9169	6.27023	0	46.2972	0.751547	6.45875	8.37266	6.80257	0.645989	7.96471	21.5877	3645.82	645.318	0	0.19078	0	6.48078	35.9777	359.229	16.9476
DNA replication	g__Methanosphaera	101.801	0.99711	0	0	49.1991	291.864	0	1.3722	15.4871	112.521	94.0982	56.0383	0	25.9034	0	69.2119	2.68354	319.136	0.317452	61.4299	1351.64	408.213	64.4389	25.6563	3.55269	0	44.9885	0.69107	1.99878	7.45342	8.00102	8.55608	6.62607	22.956	0	0	0	0	0	0	0	0	0
DNA replication	g__Methyloceanibacter	106.995	1.04799	1.48464	0.0196414	2.55285	1139.67	7.55001	2.62401	829.316	0.407865	5.38485	6.02071	14.0682	21.5589	555.105	12.1899	47.274	9.67755	7.53112	14.3947	440.082	17.6669	1.78138	13.9923	3.83866	10.1289	0.2032	0	14.3013	17.5994	0.402982	7.15124	6.17414	1.20704	0.365247	0	8.51163	1.49798	0	0.426842	1.3292	0.683888	0.546995
DNA replication	g__Mucispirillum	17.5078	0.171483	99.186	1.3122	8.63659	0	0	1.29958	0	41.4614	0.8113	51.5134	0	0.749917	0	10.3902	8.09205	28.5516	0	7.13516	0	13.1028	151.412	0	0.161486	37.0566	4.88306	38.7776	47.6194	21.5208	12.9713	2.94854	26.9089	9.23009	80.7934	17.8287	0	5.10167	48.0617	2.75551	0.974544	736.139	1.01951
DNA replication	g__Mycobacterium	78.4007	0.76791	1.95019	0.0258004	7.21903	752.967	140.844	1.1877	517.953	0	18.6333	13.2757	33.4495	34.8608	293.316	16.643	92.2933	2.71647	16.0178	16.9099	202.261	107.779	3.39286	17.3741	3.82098	12.7496	0.162889	0.321336	9.37615	13.8314	1.14465	7.70916	11.9543	1.85669	0.18733	0	6.18891	0.348065	0.742422	1.84132	0.256798	6.83408	1.15277
DNA replication	g__Nocardioides	33.997	0.33299	68.01	0.899754	5.09164	44.9736	379.522	8.87321	190.005	0.126033	0	0.264672	0.732144	1.28232	66.3525	0.23167	38.027	124.222	1.21955	1.19536	144.629	4.9227	0.671238	1.47953	0	1.93198	0	0	2.83155	0.246579	0	0.309772	0.768853	0	3.47466	0	331.569	37.2486	7.94616	27.7196	38.7629	143.217	22.1515
DNA replication	g__Paludihabitans	39.479	0.386684	69.549	0.920113	22.9821	0	0	7.48343	0	26.3011	10.262	56.4001	53.487	5.01657	5.14065	7.9384	0.863864	13.3031	119.888	4.46562	0	1.47761	23.0129	26.8506	113.225	317.902	1.32263	68.6304	137.35	1.21006	99.9779	21.3185	10.8142	27.7459	0.0976938	114.757	6.20508	33.478	162.088	43.1619	156.681	34.0551	75.4181
DNA replication	g__Parabacteroides	39.2334	0.384279	39.3347	0.520387	8.83759	0.819267	0	9.69829	0	86.1809	16.5211	32.1996	14.6651	0.396775	3.22796	7.95779	0.0582457	10.082	49.096	40.8861	0	106.324	29.2286	31.3535	20.839	29.5063	0.105324	57.1099	12.5927	384.209	74.9661	44.8609	86.9261	18.3528	0.0618063	0.123326	0	139.452	1.42839	8.30628	2.02709	170.218	32.3958
DNA replication	g__Rikenella	74.4593	0.729305	3.57715	0.0473247	24.7115	0	0	38.6984	0	233.224	106.48	122.847	33.3692	3.2755	3.31527	66.6848	2.29942	40.1226	389.546	69.9064	0	152.331	8.12904	21.8774	23.709	141.256	6.13284	316.092	43.24	28.4741	184.03	50.3917	92.608	31.0271	0	0	0	2.82015	0	0	0.755844	3.17011	25.4483
DNA replication	g__Ruminococcus	40.409	0.395794	50.3373	0.665948	47.0927	22.0382	0	24.885	0	43.7265	21.5488	68.9691	78.5945	38.0899	4.18019	54.8413	66.7339	29.0237	29.5414	19.6804	8.64578	7.9431	11.9864	49.2137	96.6711	64.1156	6.69423	30.6943	128.607	3.93246	47.46	59.847	86.1835	61.3307	22.8155	67.1213	29.4694	41.4479	101.564	28.7605	49.3184	63.5469	48.9919
DNA replication	g__Ruthenibacterium	91.2169	0.893442	148.588	1.96578	34.7156	11.9814	0	30.8251	0	30.3917	22.4498	101.937	143.478	65.0812	32.951	180.035	89.3647	165.197	566.266	67.9104	3.3189	26.8313	46.9047	149.018	125.44	306.443	32.5886	28.7562	81.5573	5.43578	81.7131	88.7682	70.874	146.275	15.5791	82.6643	292.839	137.256	74.7473	99.2363	230.325	131.148	273.495
DNA replication	g__Thomasclavelia	91.4217	0.895448	119.125	1.57599	215.696	9.25347	495.017	0.241894	6.54217	68.243	35.9679	93.2486	48.4537	176.13	0	54.0075	234.488	130.763	2.41494	122.569	5.05509	304.322	213.416	94.3599	3.9726	27.569	85.9499	2.84289	41.4833	170.069	44.8209	6.09742	38.9392	10.7178	9.51376	156.789	535.456	81.7873	25.8408	36.0641	140.218	85.1784	1.27805
DNA replication	g__Vibrio	109.663	1.07412	0.431121	0.00570361	386.009	78.1748	0	67.6492	838.311	12.3809	88.8656	215.694	1.76691	1.55006	0	626.769	1.94738	190.474	4.47051	74.8864	1.50073	34.7394	0.634403	0.744827	0.275208	0.480386	27.52	3.87579	5.32799	469.888	0.864998	93.8879	31.6003	29.6003	0	0	0	0	0	0	3.88009	0	0
DNA replication	g__unclassified_c__Caudoviricetes	1497.95	14.6719	107.702	1.42487	222.813	2232.76	48.081	108.384	458.594	558.483	3972.07	423.323	165.385	2961.3	52.2569	408.625	896.291	2157.27	76.8195	12744.8	8507.57	3179.86	257.33	492.855	200.758	132.544	365.784	223.373	177.358	2626.19	312.15	70.6776	76.5779	828.214	32.722	83.5878	94.9856	79.1026	137.836	178.789	126.186	102.435	133.675
DNA replication	g__unclassified_f__Erysipelotrichaceae	80.218	0.785711	177.449	2.3476	178.26	8.72248	457.067	0.19155	10.7482	44.6393	25.8095	72.2283	46.5505	213.854	16.122	47.4295	191.304	164.582	2.81586	68.7746	0	249.576	166.744	85.0991	2.27529	18.9775	79.4519	5.41818	35.2851	126.692	37.4097	15.7285	21.0168	13.7666	86.8974	619.361	100.618	213.13	12.688	114.88	135.688	256.065	57.7139
DNA replication	g__unclassified_f__Methanobacteriaceae	0	0	137.557	1.81984	0	0	0	0	0	0	0	0	0	0	0	0	0	0	0	0	0	0	0	0	0	0	0	0	0	0	0	0	0	0	972.208	156.502	0	0	0	0	13.6985	93.9379	1.66808
DNA replication	g__unclassified_f__Nitrososphaeraceae	145.776	1.42783	99.8292	1.32071	6.75666	600.123	21.8227	1.25155	1607.09	0.630139	2.05717	10.5452	4.55857	19.2481	596.849	7.51381	66.0118	4.03381	11.2302	28.0904	1135.69	166.66	2.4908	1.32914	2.00612	4.28113	0.811147	0	37.0236	17.913	0	7.17325	7.21413	2.86195	16.2003	0.600191	524.683	89.6141	33.3844	30.097	105.747	67.0111	31.1268
DNA replication	g__unclassified_p__Bacillota	54.7285	0.536049	749.857	9.92039	0	0	0	0	0	0	0	0	0	0	0	0	0	0	0	0	0	0	1641.86	0	0	0	0	0	0	0	0	0	0	0	5452.58	595.26	0	0	0	0	78.3626	516.47	106.041
Fatty acid biosynthesis	g__Alistipes	47.1438	0.772476	1.41906	0.0316611	13.1512	0	0	34.9061	0	201.847	42.1913	84.0615	13.0839	1.84873	6.23123	25.129	0.699642	13.6362	86.5166	53.1087	0	126.306	7.63075	8.01241	8.25782	71.2449	3.54745	191.793	27.1676	43.0247	94.3517	53.333	154.285	48.9469	0.136113	0.363293	0	1.42759	0.31536	2.26058	0.44906	6.40268	1.41686
Fatty acid biosynthesis	g__Anaerofustis	132.165	2.1656	17.0354	0.380082	240.184	5.02002	494.449	7.92388	4.77194	53.2107	356.402	130.294	156.724	209.507	10.009	176.125	223.301	215.715	2.01094	77.0605	0	328.104	207.998	86.0973	62.4565	41.6609	89.2464	6.95454	92.1872	252.923	47.9927	83.6959	252.508	50.4293	21.7132	25.8091	15.919	18.9884	2.17143	15.1183	34.9009	3.62297	15.075
Fatty acid biosynthesis	g__Anaerorhabdus	125.912	2.06314	361.595	8.06767	36.442	5.77397	0	946.212	0	100.906	283.613	6.53219	8.7531	680.45	350.825	199.069	43.413	105.285	3.89589	8.49165	2.41131	11.9192	4.11618	30.9462	9.53174	0.12115	67.0646	48.7137	68.8441	105.448	0	508.194	101.719	38.6814	11.933	55.1269	1450.83	743.274	0.11908	280.345	666.661	18.4123	27.6569
Fatty acid biosynthesis	g__Anaerotruncus	31.4778	0.51578	91.472	2.04086	18.0274	2.3545	0	44.9947	0	30.8594	10.0989	55.6328	14.423	1.08602	6.60963	28.8056	4.54682	13.8757	107.057	13.0026	0	5.12898	117.442	18.7149	58.6927	87.0208	2.91654	41.1793	18.1228	2.43301	97.1202	30.5799	39.9504	73.6577	21.3053	121.837	82.9743	54.6665	96.9572	138.766	123.957	102.621	80.1634
Fatty acid biosynthesis	g__Bacteroides	102.335	1.67681	92.4782	2.06331	35.1051	0	0	344.028	0	286.248	340.854	164.945	12.5753	2.35753	25.5633	31.9998	1.85949	17.2543	66.8225	491.33	0.690983	169.778	7.18709	6.72802	12.1007	49.1126	2.98657	335.891	24.3641	56.3864	30.4903	316.298	30.2268	206.86	0.216322	19.8721	52.2605	203.665	12.5471	100.692	39.6152	143.978	259.458
Fatty acid biosynthesis	g__Bilophila	119.191	1.95301	94.4361	2.107	62.2071	0	0	145.535	0	81.4811	56.8188	85.4447	624.837	2.68303	1.57196	51.1319	54.6797	6.47304	423.263	171.169	9.29484	30.1686	27.4942	177.661	237.339	426.381	11.2153	112.795	86.7794	36.5329	264.038	65.5287	228.389	94.8295	48.5415	82.7637	138.887	50.8966	83.1117	105.689	58.7073	83.7399	197.588
Fatty acid biosynthesis	g__Bradyrhizobium	121.225	1.98634	10.6836	0.238365	5.61852	36.3904	505.515	0	53.5711	0.337031	0	0.870945	0.666685	0.173383	60.7494	0.509122	14.9133	9.6213	1.33737	1.39711	2936.7	1.06487	0.310399	2.07426	0.124457	0.432888	0	0	1.64487	0.871237	0	0	1.86817	0	0	0	47.5536	7.0921	0.502066	4.62229	4.73549	31.528	0.118762
Fatty acid biosynthesis	g__Breznakia	793.443	13.001	48.2067	1.07556	1665.95	45.4879	3574.76	23.0516	67.1375	385.691	1274.47	789.91	735.53	1410.25	37.2261	826.529	1716.7	1376.85	16.5996	537.993	0	2394.82	1441.28	531.825	243.909	197.913	619.889	45.443	478.085	1457.38	357.725	321.509	996.03	233.343	163.513	3.53035	31.9936	3.36506	18.6107	60.4171	114.037	2.73695	35.6568
Fatty acid biosynthesis	g__Candidatus_Avidesulfovibrio	23.9916	0.393115	29.588	0.660149	12.0418	0	0	40.4982	0	22.5588	8.051	19.5998	118.658	0.607302	0.53341	9.59587	11.1085	0.518253	77.2086	44.0979	1.07918	11.3329	2.51603	36.8003	46.5915	74.6816	2.5561	19.3355	18.8923	8.84858	50.3553	22.2772	34.1446	25.2595	3.88657	30.2629	77.0975	40.6572	0.920641	0.802554	44.0808	0	68.5842
Fatty acid biosynthesis	g__Candidatus_Stoquefichus	55.2437	0.905197	17.23	0.384425	7.85906	0	0	115.203	0	53.2003	286.393	13.48	13.0011	370.505	0	220.326	0	25.6582	2.06799	274.359	0	2.08971	1.89805	12.4499	1.2232	0.180537	0	3.48929	11.5325	17.6549	0	91.9457	42.9968	89.7973	1.85118	27.1144	0	49.2337	0.9644	15.4735	37.6332	7.57566	15.2244
Fatty acid biosynthesis	g__Cetobacterium	52.4581	0.859554	0	0	364.289	0	0	0	0	1.66643	0.663251	8.65362	106.17	0	0.684645	0	14.4366	16.6165	66.2773	0	2.54428	26.9195	3.53756	14.3432	41.3074	140.899	0	720.515	22.8176	0	19.9323	1.47043	0	0	0	0	0	0	0	0	0	0	0
Fatty acid biosynthesis	g__Christensenella	151.095	2.47577	51.5664	1.15051	17.6452	0	0	0.185889	0	30.6539	4.57428	89.693	388.639	1.39929	0	5.77061	30.3925	23.8179	152.256	3.60735	3.50855	18.4941	61.6348	1125.86	770.195	829.337	44.5344	37.3598	230.138	2.40227	311.213	112.819	14.9375	221.772	16.9567	4.96141	82.1686	75.8935	23.4401	121.605	31.8634	11.1895	96.0187
Fatty acid biosynthesis	g__Clostridium	450.6	7.38331	351.061	7.83264	650.172	473.041	14.4492	568.235	0.989304	333.073	540.792	874.442	630.322	180.758	116.968	798.205	1569.58	232.967	474.912	260.158	73.4768	261.074	170.286	687.457	1072.62	509.717	165.764	420.584	512.925	13.3039	268.503	520.835	475.782	646.597	44.1088	368.587	261.962	384.626	481.921	306.668	682.599	254.581	374.496
Fatty acid biosynthesis	g__Desulfovibrio	211.324	3.46266	175.931	3.92525	106.785	0.204544	0	87.9271	0	1275.37	84.3317	168.756	366.867	26.5396	6.48163	61.6168	162.368	17.8518	919.477	151.715	0	86.3013	304.579	236.987	354.409	212.319	10.0307	318.176	74.2215	43.1448	520.34	159.183	350.026	233.732	132.863	177.033	29.6603	34.503	63.8494	158.751	23.4483	600.002	363.265
Fatty acid biosynthesis	g__Dorea	12.7067	0.208207	41.0824	0.916602	16.5764	0	0	21.3942	0	9.80444	11.6145	20.6197	17.4222	13.5037	46.2778	31.9403	6.30634	5.60811	2.75671	4.62529	2.69308	2.73481	7.1293	12.65	17.3	3.84175	2.21982	7.99581	45.7788	0.766593	7.83828	23.9432	4.49479	33.3665	24.3035	11.8202	48.1137	110.681	70.0005	30.3854	29.5131	31.9454	12.9786
Fatty acid biosynthesis	g__Enterocloster	8.00148	0.131108	52.647	1.17462	4.59564	0	0	6.26826	0	6.60145	3.22208	9.83379	4.34525	0.884333	2.07687	4.04262	0.586878	4.38549	9.56374	3.28649	0	0	27.8226	9.10866	12.6136	8.55239	0.149567	12.5044	3.36671	0.343165	8.21255	7.91701	7.74941	82.0115	2.38902	34.1772	36.6086	87.4902	112.097	67.8943	86.4541	26.9931	19.7187
Fatty acid biosynthesis	g__Eubacterium	35.0247	0.573899	33.0669	0.737767	33.9929	45.6047	0	54.9356	1.9315	34.8951	21.3023	46.0405	35.8905	29.3476	11.52	42.9161	13.3932	40.223	66.2683	29.6558	2.52754	9.40991	25.2316	50.9919	23.9741	51.3596	15.6812	19.8087	159.071	2.65411	21.025	42.4453	15.4888	103.155	6.05065	12.9738	28.7689	49.8355	11.7691	36.0855	66.3535	40.2467	45.5187
Fatty acid biosynthesis	g__Evtepia	40.1754	0.658295	24.5448	0.547627	69.5987	3.11377	0	20.5496	0	31.7406	70.4084	115.931	39.4692	107.555	21.4796	36.67	22.8506	80.0247	18.7009	10.7476	6.67599	5.34979	14.1248	32.371	48.5111	58.753	21.7778	40.7848	36.4688	12.2141	46.2548	112.199	77.8799	43.0563	2.63131	5.18945	16.0455	4.36457	76.4073	47.9367	19.8217	28.8251	19.6814
Fatty acid biosynthesis	g__Faecalicatena	19.5679	0.32063	51.8008	1.15574	18.9872	0.371943	0	7.41359	0	2.45578	21.9826	49.563	0.770134	17.5737	23.8033	29.3602	8.09478	6.99529	2.10799	1.41234	0	0.647173	8.93713	9.99712	24.437	2.82735	0.506725	15.5712	5.78723	7.87919	4.45625	115.406	32.4087	167.283	15.9719	38.7826	30.7859	56.7216	141.651	80.3322	30.5048	35.7556	35.701
Fatty acid biosynthesis	g__Hungatella	1.53281	0.0251158	45.8407	1.02277	1.45291	0	0	0.972542	0	1.45158	2.50755	7.82699	1.009	0.257153	0.642778	0.920725	0.276394	1.42407	3.34337	0	0	1.00106	3.50079	0.593891	2.01437	2.02814	0.150688	0.58558	1.45618	0.484847	3.67404	2.13628	4.98484	1.28845	10.0442	15.9838	34.3986	66.6414	72.7	61.3703	119.135	12.9454	19.3477
Fatty acid biosynthesis	g__Hydrogenoanaerobacterium	7.38531	0.121012	96.3105	2.14882	10.8082	0	0	16.326	0	13.8554	5.43278	16.7587	5.48167	1.16648	0	3.78521	0.577608	3.85577	28.6979	2.65586	0	1.09542	6.16933	4.16533	7.1103	19.8334	2.64949	11.5893	12.1929	0.830977	9.46247	2.23874	21.8758	12.944	21.2186	54.0215	205.223	114.894	44.8415	175.548	90.489	58.2536	102.305
Fatty acid biosynthesis	g__Hyphomicrobium	77.766	1.27424	1.96856	0.0439212	1.71845	523.385	18.3281	1.11506	882.339	1.05676	8.38691	0.649911	7.94746	21.0888	302.32	20.5152	84.6419	20.1176	7.04883	5.82409	336.051	40.0906	0.5901	7.93937	1.63498	3.48384	1.30233	0	6.73706	12.4936	0	7.17187	7.5086	1.4947	0.215042	2.42606	9.82358	2.72588	0	0	1.40355	1.12291	0
Fatty acid biosynthesis	g__Intestinimonas	20.8368	0.341422	63.7787	1.42299	11.3132	1.34748	0	23.8664	0	29.5293	64.2242	34.0218	10.951	1.54472	2.09801	38.5536	3.01005	9.58004	51.8695	19.0431	0	2.9514	21.7129	6.90744	22.8558	70.7693	3.34433	10.9491	12.6297	5.23726	49.4303	33.8009	45.976	37.5879	2.68373	88.5594	22.1156	59.3008	72.523	30.7262	61.563	47.4464	189.09
Fatty acid biosynthesis	g__Kineothrix	11.998	0.196594	118.802	2.65062	14.6363	0	0	15.4343	0	3.62471	1.23112	15.8077	2.31756	8.72193	0	3.45597	0.971983	6.48391	66.6231	21.8669	0	0.8678	35.6761	6.58618	8.40325	18.22	3.01795	16.5697	23.0395	0	34.9004	15.5682	2.86959	33.0472	47.2626	102.707	10.7431	31.0527	289.204	277.503	25.1325	65.5821	220.028
Fatty acid biosynthesis	g__Lachnoclostridium	10.999	0.180225	123.614	2.758	10.0854	0	0	12.3045	0	7.74074	7.69343	15.6934	14.2599	8.99206	28.9496	20.611	4.5195	2.53825	5.98507	1.09895	1.22743	0	5.05998	10.4745	22.403	10.4921	3.0867	8.24968	50.6901	1.99142	12.0741	31.3681	3.96752	28.4139	19.8196	41.8501	112.477	206.613	234.547	100.092	181.122	82.8219	133.188
Fatty acid biosynthesis	g__Longicatena	2.37443	0.0389063	128.292	2.86237	0.35793	0	0	0	0	0	0	0	5.6179	0	6.48577	2.11975	0	0	0.560196	7.80539	0	0	0	41.6558	0	0.227343	0	0.257827	0	0	0.202791	1.16313	0	4.77901	6.15417	516.549	56.9474	185.724	1.48384	101.997	83.8275	175.89	26.0574
Fatty acid biosynthesis	g__Mailhella	34.9257	0.572276	59.0376	1.31721	17.9716	0	0	27.5965	0	72.8967	14.4252	15.3384	23.4147	1.00511	0.29103	18.8096	30.4999	4.84227	133.419	105.817	0.665835	5.8586	37.0199	95.5507	85.0212	51.9274	7.86689	50.3698	12.2481	1.08679	117.588	13.2205	40.8634	62.1578	44.2275	45.158	31.0655	4.66134	7.95151	34.7152	12.493	208.571	142.495
Fatty acid biosynthesis	g__Massilimicrobiota	36.9675	0.605732	24.882	0.55515	7.35459	51.7928	1.56523	134.674	0	35.6685	156.906	6.44137	5.95165	193.914	37.414	104.102	4.1615	24.2011	0.940782	116.214	0	11.053	1.88098	6.20375	3.07704	0.36345	3.78136	7.09575	17.0017	16.7658	2.06793	92.7972	27.1786	38.4585	3.82682	26.8673	0	83.4587	0.485659	19.5586	50.8307	15.5217	23.3882
Fatty acid biosynthesis	g__Mediterraneibacter	11.2697	0.18466	35.2035	0.785437	8.63977	0	3.53777	1.34512	0	2.34548	7.6786	23.7019	5.00583	12.4056	9.11896	5.11756	2.68885	3.57032	3.33279	1.40392	1.55541	2.98085	7.98377	4.75636	13.4975	2.85849	1.94584	8.0899	11.7877	5.02367	4.63439	53.0563	20.7399	109.289	6.03132	24.3568	45.1204	38.8838	65.6907	58.1817	36.0967	28.7137	13.7561
Fatty acid biosynthesis	g__Merdibacter	113.722	1.8634	26.3417	0.587717	221.39	9.40485	592.36	0.306461	18.2113	53.8957	57.6409	77.9772	58.2626	252.342	2.19262	155.074	262.525	310.668	2.03393	77.1427	0	323.648	194.869	69.4303	4.75526	26.6593	92.9447	4.86031	37.2493	184.901	42.8454	33.2486	174.858	69.9647	23.7891	89.0389	14.361	42.0886	2.17268	17.5636	25.8164	12.5732	9.67145
Fatty acid biosynthesis	g__Methyloceanibacter	86.7977	1.42223	1.21563	0.0271224	0.427076	944.599	23.3538	2.6034	605.139	1.17335	8.53882	5.10622	12.5338	15.1044	431.247	6.15475	24.9531	3.6112	4.70157	11.9724	423.501	18.5945	4.13688	13.9029	1.60013	5.09948	1.19404	0.244139	9.63744	11.7689	0.381001	3.83806	6.65436	2.15747	0	0	7.60582	2.15241	0	0	0.47039	0.712088	0
Fatty acid biosynthesis	g__Mucinivorans	39.3234	0.644334	14.6542	0.326955	8.13488	0	0	18.4284	0	114.066	52.6753	62.4373	17.63	1.31571	9.10775	30.1377	0.884678	11.9679	252.317	33.9971	0	83.8567	4.11661	9.90591	12.3709	65.9575	2.1267	149.698	20.4501	16.2159	97.9884	24.0776	62.1067	17.73	0	0	0.217083	0	0.670889	0	1.89932	2.85888	126.242
Fatty acid biosynthesis	g__Mycobacterium	162.772	2.6671	3.70063	0.0825661	13.0142	1681.58	232.547	2.61485	1160.37	0.8523	28.7587	27.9862	51.9396	60.4736	589.783	32.7575	151.242	16.3521	33.6252	35.7854	414.646	172.2	5.80861	38.5502	7.11333	20.105	1.39692	0.713504	22.4885	43.5324	2.52313	15.3099	13.8089	5.26631	0.192286	0	13.6702	1.86872	1.56601	5.42226	0.937454	7.11074	2.53801
Fatty acid biosynthesis	g__Mycolicibacterium	101.111	1.65676	2.36578	0.0527837	4.32883	836.294	103.24	2.14383	1037.02	0.982408	21.5911	13.224	30.8059	41.543	312.233	27.3878	99.2029	9.62402	16.2753	17.8544	196.213	168.505	3.03917	20.352	2.37046	10.6117	0.603956	0.171417	10.8371	23.1895	1.01161	8.28137	11.4559	2.94332	0	0	4.3106	2.21669	0.434757	3.15583	1.11787	1.93339	8.12286
Fatty acid biosynthesis	g__Neglectibacter	24.3218	0.398526	25.4386	0.567568	12.63	0	0	7.36928	0	9.8496	12.2038	15.5814	108.906	1.41309	0	8.70321	8.4739	4.35973	49.0518	53.846	0	1.8307	1.72671	53.067	65.5144	97.7861	6.01724	6.9959	77.9084	0.708464	20.7565	32.2562	55.0953	17.6033	2.71683	18.8474	7.09269	93.3114	39.0223	8.96066	21.6652	29.0182	8.31249
Fatty acid biosynthesis	g__Nitratidesulfovibrio	30.2248	0.495249	18.251	0.407204	11.7204	0	0	29.4801	0	124.074	12.1944	32.9905	57.0723	0	0	10.6616	25.0707	10.8247	109.099	27.8681	0	7.53131	36.1972	44.9535	66.1402	57.2934	2.53263	40.2856	17.197	7.788	65.9898	24.2933	49.674	35.8126	2.30021	27.4754	50.1932	17.148	2.43362	1.08224	19.2464	4.01538	40.3647
Fatty acid biosynthesis	g__Nocardioides	41.231	0.675592	77.9995	1.74027	8.86767	72.2091	293.453	14.2424	272.917	0	1.06992	0.403544	0.606039	1.20239	95.1687	1.25655	63.5864	193.464	3.22156	1.17157	193.451	6.86316	1.13793	3.92098	0.198373	1.18448	0.485305	0	3.24538	1.10379	0	1.32	1.17939	0	7.32143	0.370386	412.29	35.9436	7.62731	32.4518	40.1418	137.076	28.7732
Fatty acid biosynthesis	g__Paludihabitans	27.8991	0.457141	29.9899	0.669115	10.7479	0	0	5.20488	0	10.8243	4.53187	32.766	51.8066	0.28255	0	1.37709	0	6.17299	53.5826	1.19385	3.64158	2.57888	14.8849	113.983	117.859	199.565	7.00771	28.3595	74.27	0.919784	53.4029	9.5259	4.40921	28.0738	0.317431	27.0814	2.34756	7.03591	58.1924	8.14762	98.8846	29.4519	38.4504
Fatty acid biosynthesis	g__Parabacteroides	36.3402	0.595453	47.3103	1.05556	6.70617	0.522492	0	9.16253	0	99.7929	21.8134	35.8434	3.64603	0.449599	4.53175	8.64433	1.11593	13.0877	47.9979	37.7386	0	79.5529	19.1372	31.7842	7.7418	27.4594	0.404341	51.1341	7.4216	342.084	58.3619	50.8126	100.863	22.3952	0	0.635464	1.37694	219.804	0.851622	21.5049	1.7542	125.76	54.1055
Fatty acid biosynthesis	g__Photobacterium	52.186	0.855095	2.58003	0.057564	614.511	25.1646	0	9.35507	0.467119	82.9798	18.8477	105.046	1.29209	0	0	272.012	3.70744	25.4564	2.0744	19.232	1.89722	6.43743	0.203406	0.0862951	0	0.209259	30.4434	0.610347	10.4919	33.6177	2.38126	70.4414	224.412	4.20281	0.688298	0.153718	0	0.345428	5.20704	0	0.162444	16.3305	0.332894
Fatty acid biosynthesis	g__Plesiomonas	59.6963	0.978155	0.0400672	0.000893952	1.60801	0	0	0	0	0	0	2.39917	147.483	0	12.2909	0.85896	0	0	125.44	0	0	1.62157	4.80357	32.2041	30.0134	22.535	0	1250.87	15.6391	0	140.26	0.133894	2.7309	0	0	0.360605	0	0	0	0	0	0	0
Fatty acid biosynthesis	g__Pseudolabrys	49.6538	0.813604	2.46319	0.0549571	3.64587	307.404	45.8818	0	297.522	0.842385	3.07073	8.95838	28.366	6.66045	447.205	7.88502	18.3702	3.342	12.8694	7.08604	168.489	33.091	17.3105	26.0837	3.26977	16.9148	0	1.00286	12.7456	5.78502	0.914352	2.68494	1.81966	0.393331	0	0	13.2635	2.71223	0	1.48892	0.949735	3.48144	0.272931
Fatty acid biosynthesis	g__Pseudomonas	55.5008	0.909411	0.0897041	0.00200142	0	6.40052	0.422585	0	42.3287	0	0.314806	0.39818	0	0	1.21559	1.13193	2.20073	1.12762	0	0	2.93306	0	0	0	0	0	0	0	0	1604.85	0	0	0	1.69721	0	0	0.221884	0	0	0	0	0.585453	0
Fatty acid biosynthesis	g__Ruminococcus	54.1138	0.886682	44.4655	0.992085	62.632	0.586308	0	40.6022	0	61.2871	89.21	113.942	63.9781	18.1749	16.9259	72.348	39.6867	32.6643	44.7462	40.8564	4.21055	15.7622	30.5814	97.634	74.7349	95.6877	26.8615	37.7603	127.524	12.6717	56.373	114.682	128.901	102.388	15.649	46.72	32.1517	23.8871	117.547	47.0722	49.0042	33.168	34.9904
Fatty acid biosynthesis	g__Ruthenibacterium	16.6365	0.272597	33.9015	0.756388	5.07174	2.54959	0	6.30057	0	4.61815	5.37575	17.0644	27.1718	9.31981	1.742	29.3545	12.746	21.1583	140.001	11.8925	0	6.45035	8.6744	19.1878	14.6544	56.141	3.10962	3.41058	9.53492	1.12664	13.5505	20.5279	16.8357	31.5247	2.08249	22.9774	46.2728	30.0424	15.7757	36.8247	63.3341	45.361	42.4432
Fatty acid biosynthesis	g__Thomasclavelia	15.4387	0.252971	117.887	2.63022	9.78826	0	0	7.51488	0	8.67578	10.8909	11.776	5.66687	27.9722	2.31893	49.0498	2.83127	80.5259	4.70437	3.07883	1.23137	1.05645	11.224	15.1259	11.6838	12.4555	6.24707	9.31017	4.27606	5.05018	14.9442	24.3524	82.5365	38.8739	0.27428	157.247	448.834	68.9181	41.114	26.1623	226.338	89.235	2.86099
Fatty acid biosynthesis	g__Treponema	25.6854	0.42087	22.8083	0.508883	25.3082	0	0	169.282	0	45.4042	8.84089	35.4397	3.21669	1.53228	0.794188	17.6194	9.92785	30.7966	6.59334	26.9249	0	2.65996	16.3592	11.4481	19.2188	43.6858	18.2728	11.0625	27.7873	0	180.642	31.13	8.30602	18.3102	11.9744	6.90518	2.4352	7.25855	21.3759	9.16612	11.2973	24.966	109.896
Fatty acid biosynthesis	g__Vibrio	136.794	2.24144	0.0196902	0.000439314	588.767	102.39	6.88184	128.631	263.025	22.3602	141.262	299.363	49.8974	2.36623	0	930.573	0.599178	228.024	6.75446	124.578	0	52.6811	47.2707	13.5817	38.9181	21.6869	40.6123	0	35.1744	679.962	76.7837	122.446	52.0628	27.1589	0	0	0	0	0	0	0.177212	0	0
Fatty acid biosynthesis	g__unclassified_f__Erysipelotrichaceae	0.689682	0.0113008	76.8601	1.71485	0	0	0	0	0	0	0	0	1.11094	0	4.39521	0.620971	0	0	0.364361	2.34469	0	0	0	10.0968	0	0	0	0	0	0	0	0	0	1.75747	5.58225	280.942	24.2762	123.713	0	60.0386	48.8293	139.19	9.16974
Fatty acid biosynthesis	g__unclassified_f__Nitrososphaeraceae	29.7014	0.486673	16.3813	0.365488	0.629862	88.7998	0	0.369955	312.037	0.47968	0.817002	3.33673	0.232243	4.63039	97.2951	1.08509	8.60196	1.35225	2.6766	5.15877	308.864	40.1482	0.217405	0.482568	0	1.00704	0	0	5.39669	3.87373	0	1.51377	2.03605	0	2.06237	0	95.6066	11.8113	3.14868	2.55158	20.5932	6.76704	4.89087
Fatty acid metabolism	g__Alistipes	49.6839	0.647671	1.43164	0.0276801	14.0595	0	0	36.0031	0	213.152	44.1464	90.7731	14.6839	1.84873	6.67908	25.6344	0.699642	15.7475	90.6573	56.4559	0	136.454	8.57179	8.29511	9.02054	74.5177	3.64829	197.903	29.5136	46.2758	98.885	58.2222	159.088	49.5787	0.136113	0.363293	0	1.42759	0.31536	2.26058	0.44906	6.51589	1.41686
Fatty acid metabolism	g__Anaerofustis	132.165	1.72289	17.6119	0.340518	240.184	5.02002	494.449	7.92388	4.77194	53.2107	356.402	130.294	156.724	209.507	10.009	176.125	223.301	215.715	2.01094	77.0605	0	328.104	207.998	86.0973	62.4565	41.6609	89.2464	6.95454	92.1872	252.923	47.9927	83.6959	252.508	50.4293	21.7132	25.8091	15.919	19.2193	2.17143	15.1183	38.7008	4.78057	15.075
Fatty acid metabolism	g__Anaerorhabdus	125.912	1.64138	361.595	6.99129	36.442	5.77397	0	946.212	0	100.906	283.613	6.53219	8.7531	680.45	350.825	199.069	43.413	105.285	3.89589	8.49165	2.41131	11.9192	4.11618	30.9462	9.53174	0.12115	67.0646	48.7137	68.8441	105.448	0	508.194	101.719	38.6814	11.933	55.1269	1450.83	743.274	0.11908	280.345	666.661	18.4123	27.6569
Fatty acid metabolism	g__Anaerotignum	34.7631	0.453166	17.5178	0.338698	31.8798	0	0	97.9125	0	18.0121	14.5493	123.995	13.9653	26.3943	22.4223	48.4878	3.24204	63.1309	12.6249	2.5418	0	1.91589	12.7793	13.5853	8.80147	38.5049	61.7862	38.687	30.2422	10.8608	11.8066	46.3766	37.4294	250.958	8.72073	8.60135	15.9293	4.32635	37.3139	44.0162	8.85472	16.9474	12.95
Fatty acid metabolism	g__Anaerotruncus	37.413	0.487711	91.5253	1.7696	20.1431	2.3545	0	46.9344	0	33.1191	11.1138	64.967	18.4708	1.08602	7.07987	33.4451	6.36466	18.8155	117.671	14.327	0	7.97551	123.525	23.9376	79.917	115.236	3.89606	46.7182	36.9789	2.54254	119.089	45.1072	41.9088	79.6673	21.3053	121.837	82.9743	54.6665	96.9572	139.247	123.957	102.621	80.1634
Fatty acid metabolism	g__Bacteroides	94.0567	1.22611	91.5284	1.76966	30.596	0	0	313.84	0	257.688	313.504	149.288	12.1425	2.2191	24.8485	29.8331	1.85949	16.4815	64.7001	452.087	0.690983	142.01	6.97229	6.57213	11.4754	45.568	2.82628	312.822	22.6058	54.3158	28.4837	289.99	28.9756	199.306	0.216322	19.5475	52.2605	202.571	12.3984	100.538	39.4436	141.365	255.415
Fatty acid metabolism	g__Bilophila	118.658	1.54681	93.4628	1.80706	59.3218	0	0	146.018	0	78.5045	57.0077	84.3819	629.551	2.68303	1.57196	50.8473	54.6797	6.47304	408.593	175.474	9.29484	30.1686	27.4942	175.226	237.576	427.347	11.2153	112.795	87.1091	36.5329	262.957	64.1788	228.389	94.3601	47.7217	82.4586	140.619	50.8966	82.5957	105.689	61.2776	83.7399	186.167
Fatty acid metabolism	g__Blautia	4.9192	0.0641259	61.4669	1.18844	1.93146	0	0	3.03171	0	2.46186	1.31969	12.7605	1.65572	1.3596	3.44823	6.15356	6.30938	4.48894	21.7284	0	0	0	6.6514	2.53541	5.15742	6.90543	2.7693	3.97669	9.35068	0.0987446	4.58013	23.5873	7.77916	7.53518	10.5614	52.3528	59.3361	29.3777	185.334	70.3569	37.2826	60.1982	48.4026
Fatty acid metabolism	g__Bradyrhizobium	227.573	2.9666	23.4852	0.454076	12.5675	54.1028	1030.67	0.184075	115.845	0.776829	0	0.870945	1.19461	0.53475	103.964	0.86323	29.1751	9.84815	1.76301	1.55638	5435.22	13.4077	0.887809	3.34652	0.124457	1.40433	0	0	4.28401	1.34027	0	0.128256	3.11189	0	0.148943	0.364997	101.828	14.2994	0.713162	11.262	10.7126	71.6904	0.347626
Fatty acid metabolism	g__Breznakia	793.443	10.3432	48.2067	0.932055	1665.95	45.4879	3574.76	23.0516	67.1375	385.691	1274.47	789.91	735.53	1410.25	37.2261	826.529	1716.7	1376.85	16.5996	537.993	0	2394.82	1441.28	531.825	243.909	197.913	619.889	45.443	478.085	1457.38	357.725	321.509	996.03	233.343	163.513	3.53035	31.9936	3.36506	18.6107	60.4171	114.037	2.73695	35.6568
Fatty acid metabolism	g__Candidatus_Avidesulfovibrio	23.9916	0.312751	29.588	0.572072	12.0418	0	0	40.4982	0	22.5588	8.051	19.5998	118.658	0.607302	0.53341	9.59587	11.1085	0.518253	77.2086	44.0979	1.07918	11.3329	2.51603	36.8003	46.5915	74.6816	2.5561	19.3355	18.8923	8.84858	50.3553	22.2772	34.1446	25.2595	3.88657	30.2629	77.0975	40.6572	0.920641	0.802554	44.0808	0	68.5842
Fatty acid metabolism	g__Candidatus_Stoquefichus	55.2437	0.720148	18.852	0.364496	7.85906	0	0	115.203	0	53.2003	286.393	13.48	13.0011	370.505	0	220.326	0	25.6582	2.06799	274.359	0	2.08971	1.89805	12.4499	1.2232	0.180537	0	3.48929	11.5325	17.6549	0	91.9457	42.9968	89.7973	1.85118	27.1144	0	49.2337	3.28109	15.4735	49.9144	7.57566	15.2244
Fatty acid metabolism	g__Cetobacterium	58.3971	0.761256	0	0	382.501	0	0	0	0	1.66643	0.831897	9.86172	131.743	0	0.684645	0	17.4379	17.7571	81.596	0	2.54428	31.6417	3.81171	17.8278	52.7534	178.589	0	767.652	27.4187	0	24.1257	1.47043	0	0	0	0	0	0	0	0	0	0	0
Fatty acid metabolism	g__Christensenella	149.57	1.94977	50.4549	0.975524	19.9364	0	0	3.94519	0	30.9366	6.45317	91.7562	372.185	1.79163	0	11.9949	32.359	22.7709	158.178	5.42035	3.50855	19.1974	69.3265	1048.33	759.22	845.086	45.2932	40.601	233.673	3.25448	317.161	120.281	13.9154	210.529	16.3116	4.96141	85.5042	69.4578	23.2866	117.8	34.3788	11.1895	91.2044
Fatty acid metabolism	g__Clostridium	461.759	6.01942	380.765	7.36193	686.316	451.765	14.4492	589.71	0.989304	340.586	613.354	920.667	643.702	181.544	127.757	784.174	1541.87	236.895	494.202	273.791	83.5773	300.204	177.179	701.632	1082.41	531.906	163.664	446.502	516.352	13.3039	280.502	526.727	462.211	664.823	50.0358	383.367	275.82	392.48	541.061	354.444	711.342	272.335	446
Fatty acid metabolism	g__Desulfovibrio	217.749	2.83854	186.754	3.6108	109.284	0.204544	0	96.4284	0	1282.01	86.2174	174.735	376.291	26.6256	6.48163	62.7542	168.046	18.4309	946.306	155.807	0	86.9712	324.685	242.974	366.744	215.612	11.885	352.681	77.271	43.7936	538.346	167.583	356.488	237.807	138.062	189.536	38.9409	35.6458	83.0444	190.574	26.4883	606.508	371.982
Fatty acid metabolism	g__Dorea	12.7067	0.165643	41.0824	0.79431	16.5764	0	0	21.3942	0	9.80444	11.6145	20.6197	17.4222	13.5037	46.2778	31.9403	6.30634	5.60811	2.75671	4.62529	2.69308	2.73481	7.1293	12.65	17.3	3.84175	2.21982	7.99581	45.7788	0.766593	7.83828	23.9432	4.49479	33.3665	24.3035	11.8202	48.1137	110.681	70.0005	30.3854	29.5131	31.9454	12.9786
Fatty acid metabolism	g__Eisenbergiella	6.55509	0.0854512	46.6131	0.901244	0.825445	0	0	2.55958	0	1.60323	0.350317	31.1219	1.08448	0.324886	7.30058	5.94715	0	1.15699	37.2434	0	0	1.13737	2.27809	2.58192	12.6977	8.89246	0.379563	11.7034	14.9602	0	4.50252	6.39723	5.20586	36.3987	18.0658	62.1352	13.989	12.9404	93.1029	65.4776	71.7806	56.4513	25.575
Fatty acid metabolism	g__Enterocloster	9.25816	0.120688	59.4084	1.14864	6.38056	0	0	8.75741	0	7.23461	9.10288	10.1899	4.62958	2.4242	2.07687	7.76008	3.50762	7.7971	9.56374	3.88658	1.01368	0	27.9643	11.5568	12.8198	10.3015	1.95424	12.5044	4.64297	0.912444	8.37843	9.46015	9.39781	83.527	2.6722	34.8135	39.7584	88.1569	121.28	72.8394	118.05	34.952	22.1526
Fatty acid metabolism	g__Eubacterium	37.9023	0.494088	40.0636	0.774612	35.2789	45.6047	0	62.1214	0	35.162	23.8465	52.0723	37.34	31.3662	17.8374	49.7091	16.8042	34.2057	67.7815	31.6639	4.46788	8.76624	26.58	55.4959	27.0685	57.3965	13.9878	23.5229	174.448	2.72143	22.0597	50.0075	16.8846	112.867	11.3409	14.7555	29.4583	56.9748	13.7531	56.4823	72.5708	44.6879	60.5485
Fatty acid metabolism	g__Evtepia	45.3176	0.590754	29.2719	0.56596	83.3628	3.11377	0	22.7706	0	33.8882	75.5216	134.885	48.7602	108	23.9015	37.5048	23.0418	80.6419	24.1668	10.8636	6.67599	6.68474	15.6387	42.0569	61.7209	76.3003	22.0905	51.3385	42.1058	13.6581	62.4798	118.54	81.8754	47.9408	2.63131	7.55862	20.1236	5.75316	87.3877	58.0944	24.9128	32.8744	24.1115
Fatty acid metabolism	g__Faecalicatena	19.74	0.257328	52.3174	1.01154	18.9872	0.371943	0	7.82827	0	2.45578	21.9826	50.7991	0.770134	17.5737	23.8033	29.7573	8.09478	6.99529	2.10799	1.41234	0	0.647173	8.93713	10.422	24.6517	3.13089	0.506725	15.7926	5.78723	7.87919	4.80166	117.012	32.4087	167.283	15.9719	38.8777	30.7859	56.7216	142.782	80.3322	33.317	36.3676	35.701
Fatty acid metabolism	g__Flavonifractor	17.5814	0.229188	41.7609	0.807428	8.11913	3.45974	0	18.701	0	26.1374	47.7944	26.5679	14.717	2.94391	13.4722	38.6814	7.13381	10.4811	39.7355	11.5661	0	2.64052	16.1046	14.226	15.5761	55.2762	2.97974	18.2426	15.6204	6.34168	31.7927	22.6606	33.7984	22.671	4.94934	50.1707	6.71449	37.1413	35.1375	33.9958	56.7492	37.2894	113.7
Fatty acid metabolism	g__Hydrogenoanaerobacterium	7.38531	0.0962737	96.3105	1.86212	10.8082	0	0	16.326	0	13.8554	5.43278	16.7587	5.48167	1.16648	0	3.78521	0.577608	3.85577	28.6979	2.65586	0	1.09542	6.16933	4.16533	7.1103	19.8334	2.64949	11.5893	12.1929	0.830977	9.46247	2.23874	21.8758	12.944	21.2186	54.0215	205.223	114.894	44.8415	175.548	90.489	58.2536	102.305
Fatty acid metabolism	g__Hyphomicrobium	102.139	1.33146	2.37787	0.0459751	1.71845	689.068	23.7765	2.35299	1133.81	1.2541	10.5342	1.90011	11.547	27.2679	361.552	26.5511	112.124	22.8423	8.68122	8.27104	502.318	51.8821	0.5901	9.43599	1.63498	4.86481	1.56703	0.48243	8.91234	17.3089	1.60414	9.37863	9.32238	1.60685	0.215042	2.42606	11.1648	2.72588	0	0.173108	1.40355	1.76966	1.52274
Fatty acid metabolism	g__Intestinimonas	29.1243	0.37966	79.4613	1.53635	19.6135	1.34748	0	28.6575	3.04211	38.1322	75.4197	50.1385	16.1684	1.81184	3.0348	56.8845	4.72899	14.0106	60.5864	21.7988	0	2.9514	30.7835	14.1149	37.0796	98.5806	4.05316	19.9756	24.5024	7.02437	82.1901	46.0484	60.2218	50.8268	3.06087	105.594	24.253	62.6463	99.5004	40.0457	76.2334	79.2365	224.581
Fatty acid metabolism	g__Kineothrix	13.0432	0.170029	121.493	2.34902	15.8077	0	0	15.9132	0	3.78053	1.42736	17.0932	2.45751	9.34611	0	3.64371	1.16366	7.1556	72.1312	21.8669	0	0.8678	42.2316	6.88284	9.51981	19.5114	3.33146	17.9299	24.7528	0	39.3091	17.6569	3.41049	34.1052	47.2626	102.918	10.7431	31.0527	302.458	278.624	25.1325	67.2889	227.96
Fatty acid metabolism	g__Lachnoclostridium	12.0687	0.157326	143.05	2.7658	10.3954	0	0	12.5911	0	8.27231	7.69343	17.7438	15.5869	9.07897	28.9496	21.2514	4.5195	2.86559	9.81176	1.37403	2.36745	0.676665	11.3135	10.5724	23.6892	14.4564	3.0867	8.84943	50.951	1.99142	15.2571	31.6457	4.36292	32.708	22.3682	45.0122	127.799	242.547	268.551	109.894	216.965	93.8321	160.478
Fatty acid metabolism	g__Longicatena	2.37443	0.0309527	133.892	2.58874	0.35793	0	0	0	0	0	0	0	5.6179	0	6.48577	2.11975	0	0	0.560196	7.80539	0	0	0	41.6558	0	0.227343	0	0.257827	0	0	0.202791	1.16313	0	4.77901	19.2745	517.344	62.8916	191.96	3.47741	109.362	93.5575	176.211	30.9468
Fatty acid metabolism	g__Mailhella	38.7646	0.50533	58.4113	1.12936	20.7854	0	0	29.1629	0	72.8621	16.5186	17.6109	69.2076	0.884234	0.29103	18.8951	34.9061	5.33579	163.85	107.622	0.665835	6.53871	34.7302	88.178	85.1409	66.5498	7.72522	52.7129	13.393	3.17299	119.683	13.8218	52.3284	60.3645	44.2275	44.8681	31.0655	4.66134	7.95151	34.7152	10.5019	206.472	141.239
Fatty acid metabolism	g__Massilimicrobiota	36.9675	0.481903	26.7914	0.518001	7.35459	51.7928	1.56523	134.674	0	35.6685	156.906	6.44137	5.95165	193.914	37.414	104.102	4.1615	24.2011	0.940782	116.214	0	11.053	1.88098	6.20375	3.07704	0.36345	3.78136	7.09575	17.0017	16.7658	2.06793	92.7972	27.1786	38.4585	3.82682	26.8673	0	83.4587	2.51539	19.5586	65.9861	15.5217	23.3882
Fatty acid metabolism	g__Merdibacter	114.127	1.48774	36.2364	0.700615	221.39	9.40485	592.36	0.306461	18.2113	53.8957	57.6409	77.9772	60.5411	252.427	2.19262	155.883	262.525	310.668	2.03393	78.1934	0	323.648	194.869	76.066	4.75526	26.7968	92.9447	4.86031	37.2493	184.901	42.8454	33.4304	174.858	70.9188	33.1234	114.781	20.671	58.4075	4.68296	31.4301	35.769	14.061	13.2013
Fatty acid metabolism	g__Methanobrevibacter	11.2145	0.14619	69.709	1.34779	7.22744	0	0	0.064505	0	0	0	0	0	0	0	0	0	0	0.090623	0.111079	0	0	326.807	0	0	0	1.16918	0.964035	0	0	0	0	0	0	490.261	78.6265	0	0	0	0.674209	9.80715	43.2077	4.80463
Fatty acid metabolism	g__Methyloceanibacter	124.355	1.62107	2.55247	0.0493509	1.74932	1317.21	29.3915	2.94337	841.337	1.17335	12.3348	6.69068	16.3472	23.3718	650.738	9.45637	37.0762	6.29994	7.33778	16.3041	628.447	30.8753	6.77883	21.9142	4.07594	9.37699	1.85811	0.653102	12.5682	15.6956	1.3505	5.11347	9.15816	3.02877	0	0	16.3406	3.0092	0	0.661081	1.00313	1.9582	0
Fatty acid metabolism	g__Mucinivorans	41.0866	0.535598	14.6671	0.283583	8.33585	0	0	18.4957	0	116.255	53.0106	65.4049	18.2002	1.37691	9.42628	31.1685	0.884678	12.1983	270.298	34.633	0	86.2389	4.40177	10.2505	12.6452	73.2836	2.19842	152.92	20.9204	18.1389	104.858	24.9113	64.2411	17.901	0	0	0.217083	0	0.670889	0	1.89932	2.97532	126.242
Fatty acid metabolism	g__Mycobacterium	374.082	4.87648	9.96488	0.192667	29.581	3762.85	525.444	5.0931	2497.22	1.08849	77.7298	62.053	133.454	139.518	1484.18	83.5174	358.969	29.0602	83.6975	83.331	1005.95	413.246	16.3927	100.842	18.8664	55.964	1.51525	1.54748	62.6999	94.976	5.75163	38.0888	35.9942	13.8386	0.192286	0.177212	28.4821	5.43457	3.70405	14.2307	3.13201	23.1259	11.2051
Fatty acid metabolism	g__Mycolicibacterium	255.224	3.32707	10.5324	0.203638	19.1962	2120.42	393.458	4.66623	2419.93	1.49098	52.794	34.819	68.6244	100.971	779.099	71.0539	279.565	17.9165	44.638	41.6309	571.867	383.702	10.9232	48.7135	7.9622	27.8361	1.10033	0.651553	29.1868	67.2017	2.00769	25.0936	24.0462	6.16893	0.951542	0	18.689	7.56214	4.84938	9.8422	2.67275	14.7924	35.4318
Fatty acid metabolism	g__Nitratireductor	74.8524	0.975765	0.286142	0.00553243	2.16709	936.819	3.90025	2.67239	511.631	2.62239	22.2916	1.83229	0.853765	14.6488	70.8167	41.7341	124.588	5.03186	4.59683	9.17116	328.804	20.7106	0	1.42878	0	0.801172	0.797502	0	4.71095	7.15404	0	7.01577	117.096	1.67602	0	0	1.48044	0.218165	0.152266	0.1575	0.175759	0.391149	0
Fatty acid metabolism	g__Nocardioides	87.5976	1.14191	170.894	3.30416	17.1589	134.747	764.345	32.0998	576.812	0	0.907622	0.403544	0.855155	2.69223	167.034	2.24247	100.105	330.445	6.0631	2.06927	442.092	18.5557	2.16054	5.44995	0.198373	3.47426	0.6835	0	6.45867	4.16486	0	2.82698	3.55359	0.33057	9.62274	0.78229	886.135	76.3245	20.2185	74.6788	86.9053	320.207	63.1736
Fatty acid metabolism	g__Paludihabitans	27.8991	0.363688	29.9899	0.579842	10.7479	0	0	5.20488	0	10.8243	4.53187	32.766	51.8066	0.28255	0	1.37709	0	6.17299	53.5826	1.19385	3.64158	2.57888	14.8849	113.983	117.859	199.565	7.00771	28.3595	74.27	0.919784	53.4029	9.5259	4.40921	28.0738	0.317431	27.0814	2.34756	7.03591	58.1924	8.14762	98.8846	29.4519	38.4504
Fatty acid metabolism	g__Parabacteroides	36.2878	0.473042	39.6051	0.765748	6.70617	0.522492	0	9.08738	0	97.917	21.8134	35.8434	3.40333	0.449599	4.53175	8.64433	1.11593	11.9229	48.0909	37.2995	0	80.9597	19.1372	31.7842	7.56576	27.2106	0.404341	52.2858	7.4216	342.084	58.3619	50.8126	100.863	22.3952	0	0.635464	1.00683	159.445	0.851622	21.3474	1.57844	125.76	45.8214
Fatty acid metabolism	g__Photobacterium	73.1272	0.953275	2.58003	0.0498838	836.099	43.195	0	14.8456	0.467119	112.74	27.6809	138.281	1.91538	0	0	413.388	4.35677	34.6542	2.49124	24.8865	1.89722	11.1089	0.203406	0.0862951	0	0.209259	47.3488	0.610347	13.6174	33.6177	2.38126	99.5571	321.838	6.33989	0.688298	0.153718	0	0.345428	5.20704	0	0.162444	16.3305	0.332894
Fatty acid metabolism	g__Plesiomonas	74.9105	0.976523	0.0629248	0.00121662	1.75794	0	0	0	0	0	0	3.5794	179.774	0	15.433	1.0512	0	0	153.131	0	0	1.62157	6.15141	40.7817	37.9091	25.9882	0	1584.4	18.7888	0.170559	173.636	0.133894	3.00389	0	0	0.360605	0	0	0.205718	0	0	0	0
Fatty acid metabolism	g__Pseudolabrys	69.8423	0.910453	4.318	0.0834866	4.16014	418.02	85.3406	0	395.196	0.842385	4.01084	13.6791	40.7898	9.15963	653.157	9.97372	26.391	3.342	18.4654	10.3443	247.368	36.2198	22.7057	36.0868	4.99042	22.4088	0	1.00286	18.2466	6.72954	0.914352	3.05665	2.2731	0.393331	0	0	26.2645	3.41935	0	1.48892	1.39884	5.17681	1.11353
Fatty acid metabolism	g__Pseudomonas	100.696	1.31266	0.231272	0.00447153	0	6.79643	1.7156	0	42.3287	0	0.734546	0.769484	0	0	28.944	3.00739	2.20073	1.12762	0.134214	0.902519	9.19697	0.3733	0	0	0	0	0	0.479558	0	2920	0	0	0.289233	1.87478	0	0	0.221884	0.247807	0.201918	0.474443	0.233072	0.585453	0.116867
Fatty acid metabolism	g__Ruminococcus	54.1868	0.706371	44.4655	0.859722	62.632	0.586308	0	40.6022	0	61.2871	89.21	114.14	63.9781	18.1749	16.9259	72.348	39.6867	32.6643	44.7462	40.8564	4.21055	15.7622	30.8179	97.634	74.7349	95.9311	27.0387	38.1152	127.524	12.6717	56.6499	114.682	128.901	103.092	15.649	46.72	32.1517	23.8871	117.547	47.0722	49.0042	33.168	34.9904
Fatty acid metabolism	g__Thomasclavelia	15.4387	0.201257	117.887	2.2793	9.78826	0	0	7.51488	0	8.67578	10.8909	11.776	5.66687	27.9722	2.31893	49.0498	2.83127	80.5259	4.70437	3.07883	1.23137	1.05645	11.224	15.1259	11.6838	12.4555	6.24707	9.31017	4.27606	5.05018	14.9442	24.3524	82.5365	38.8739	0.27428	157.247	448.834	68.9181	41.114	26.1623	226.338	89.235	2.86099
Fatty acid metabolism	g__Vibrio	181.441	2.36524	0.0196902	0.000380701	757.468	127.224	6.88184	165.291	447.944	28.7063	185.965	378.882	50.0957	3.5047	0	1237.35	1.55275	348.621	9.84341	163.35	0	71.2086	51.2806	14.059	39.0696	22.3862	53.2904	4.48391	38.5109	897.189	77.2711	156.768	70.3972	34.6418	0	0	0	0	0	0	0.177212	0	0
Fatty acid metabolism	g__unclassified_f__Erysipelotrichaceae	0.689682	0.00899059	76.8601	1.48606	0	0	0	0	0	0	0	0	1.11094	0	4.39521	0.620971	0	0	0.364361	2.34469	0	0	0	10.0968	0	0	0	0	0	0	0	0	0	1.75747	5.58225	280.942	24.2762	123.713	0	60.0386	48.8293	139.19	9.16974
Fatty acid metabolism	g__unclassified_f__Nitrososphaeraceae	46.7405	0.609302	24.525	0.474181	1.75967	162.492	0	0.586826	483.501	0.47968	0.817002	4.49682	0.232243	10.134	171.905	3.28298	18.0254	1.35225	3.93383	9.48163	447.667	55.2228	0.217405	1.33743	0	1.68173	0	0	10.4422	6.11354	0	2.75837	3.9942	0.298729	3.27054	0	142.849	16.7148	4.29022	4.15774	29.3849	13.7673	6.29043
Glycosaminoglycan biosynthesis - chondroitin sulfate / dermatan sulfate	g__Acutalibacter	0.732525	1.27	0	0	0.190453	0	0	0.254969	0	0	0.638119	0	0	0.463917	0	1.34306	0	0.436824	0	0.329297	0	0	0	0	0	0	0	0	0	0	0	0	12.4878	5.83128	0	0	0	0	0	0	0	0	0
Glycosaminoglycan biosynthesis - chondroitin sulfate / dermatan sulfate	g__Alteromonas	0.460808	0.798917	0	0	0	0	0	0	13.6585	0	0	0	0	0	0	0	0	0	0	0.165769	0	0	0	0	0	0	0	0	0	0	0	0	0	0	0	0	0	0	0	0	0	0	0
Glycosaminoglycan biosynthesis - chondroitin sulfate / dermatan sulfate	g__Aquitalea	0.151111	0.261986	0	0	0	0	0	0	0	0	0	0	2.18013	0	0	0	0	0	0	0	0	0	0.310399	0	0.225893	0	0	0	0	0	1.81691	0	0	0	0	0	0	0	0	0	0	0	0
Glycosaminoglycan biosynthesis - chondroitin sulfate / dermatan sulfate	g__Bacillus	0.197707	0.342771	0	0	0.591336	0	0	0	0	0.419521	0.132086	0	0	0.360103	0	0	0	0.226049	0	0.227208	0	0	0	0	0	0	0.140677	0	0	0	0	3.83424	0	0	0	0	0	0	0	0	0	0	0
Glycosaminoglycan biosynthesis - chondroitin sulfate / dermatan sulfate	g__Bacteroides	9.553	16.5623	5.35803	28.8117	3.74578	0	0	34.3803	0	26.8732	41.1653	17.6228	1.43384	0.126678	4.15563	2.45453	0	0.668129	3.06929	54.5301	3.8291	7.10385	0.376554	0.94068	2.09121	1.91439	0.668333	24.4474	1.69227	7.02465	2.24697	34.0727	1.28451	8.67169	0	1.73407	0.334469	7.69956	0.542843	3.5024	1.54078	21.8497	11.0184
Glycosaminoglycan biosynthesis - chondroitin sulfate / dermatan sulfate	g__Basidiobolus	0.364678	0.632254	0	0	0	0	0	0	0	0	0	0	0	0	10.9403	0	0	0	0	0	0	0	0	0	0	0	0	0	0	0	0	0	0	0	0	0	0	0	0	0	0	0	0
Glycosaminoglycan biosynthesis - chondroitin sulfate / dermatan sulfate	g__Bilophila	0.712176	1.23472	0	0	1.63878	0	0	0.219392	0	1.13356	0.109816	1.30797	0.626517	0	0	0.10506	0	0	0.616447	1.60564	0	0.776984	0	1.461	1.36324	2.24832	0	0.468406	0	0.627201	1.46198	1.70014	1.66477	2.23005	0	0	0	0	0	0	0	0	0
Glycosaminoglycan biosynthesis - chondroitin sulfate / dermatan sulfate	g__Candidatus_Methylopumilus	0.522962	0.906676	0	0	0	0	0	0.288057	0	1.60283	0.288371	0.515202	0.205651	0	0	1.93117	0	0	1.61876	0.12401	0	1.02016	0	0	0	3.16285	0	2.30627	0.335673	0	0.239943	0.139516	1.78839	0.122	0	0	0	0	0	0	0	0	0
Glycosaminoglycan biosynthesis - chondroitin sulfate / dermatan sulfate	g__Candidatus_Onthousia	0.515209	0.893234	0	0	0	0	0	0	0	0	0.229645	5.33367	0	0	0	0	2.01877	0	0	0	0	0	0	0.822557	0.356349	0.839581	0.856035	0	0	0	0	4.99966	0	0	0	0	0	0	0	0	0	0	0
Glycosaminoglycan biosynthesis - chondroitin sulfate / dermatan sulfate	g__Chroococcidiopsis	0	0	0.352937	1.89785	0	0	0	0	0	0	0	0	0	0	0	0	0	0	0	0	0	0	0	0	0	0	0	0	0	0	0	0	0	0	0	0	0	0.207257	0	0	0	2.96918	0
Glycosaminoglycan biosynthesis - chondroitin sulfate / dermatan sulfate	g__Clostridium	4.35143	7.54422	0	0	43.7587	1.64585	0	0.352668	0	1.83018	13.909	20.7561	8.06145	0.122607	0	0.258147	1.84493	0	3.91061	0.320849	0	0.624492	0.76713	2.62337	16.3297	0	0.143692	8.34511	2.82685	0	0	0.130547	0.557807	1.42323	0	0	0	0	0	0	0	0	0
Glycosaminoglycan biosynthesis - chondroitin sulfate / dermatan sulfate	g__Cylindrospermum	0	0	0.965654	5.19261	0	0	0	0	0	0	0	0	0	0	0	0	0	0	0	0	0	0	0	0	0	0	0	0	0	0	0	0	0	0	0	0	7.81924	0	0	0	0.871651	0	0
Glycosaminoglycan biosynthesis - chondroitin sulfate / dermatan sulfate	g__Desulfovibrio	2.40301	4.16617	0.422485	2.27182	0	0	0	0.166971	0	0.0874512	0.264326	0.524715	1.57086	0	0	0	10.7576	0	15.7652	0.568904	0	0	0.469671	5.58255	4.55805	0.968258	0	10.4061	4.23141	0	9.97259	5.54157	0	0.653962	0	0	0	0	2.60307	0.367165	0	0.832126	0
Glycosaminoglycan biosynthesis - chondroitin sulfate / dermatan sulfate	g__Faecalibacillus	0	0	0.288118	1.5493	0	0	0	0	0	0	0	0	0	0	0	0	0	0	0	0	0	0	0	0	0	0	0	0	0	0	0	0	0	0	0	2.59306	0	0	0	0	0	0	0
Glycosaminoglycan biosynthesis - chondroitin sulfate / dermatan sulfate	g__Gallalistipes	0.145661	0.252538	0	0	0	0	0	0.398614	0	1.16181	0.133016	0.475292	0	0	0	0.127255	0	0	0	0.572019	0	0	0	0	0	0.389045	0	0	0.154835	0	0.221356	0.257416	0.366634	0.112549	0	0	0	0	0	0	0	0	0
Glycosaminoglycan biosynthesis - chondroitin sulfate / dermatan sulfate	g__Halalkalibacter	2.932	5.0833	1.93234	10.3908	0.567523	0.527878	0	3.96979	0	2.09268	3.52957	8.03756	2.34415	0.471888	0.614063	9.37391	12.0463	5.72813	1.91118	0.84057	0	0	5.86071	3.54505	2.80308	3.08055	1.79738	0.53546	2.52754	0.135696	3.56364	7.63589	1.83385	2.586	0	3.91821	0.934207	0	0	7.0234	3.697	0	1.81829
Glycosaminoglycan biosynthesis - chondroitin sulfate / dermatan sulfate	g__Halocynthiibacter	0.335286	0.581296	0	0	0	4.84364	0	0.169979	3.28877	0	0	0	0	0	1.60984	0	0	0	0	0.146354	0	0	0	0	0	0	0	0	0	0	0	0	0	0	0	0	0	0	0	0	0	0	0
Glycosaminoglycan biosynthesis - chondroitin sulfate / dermatan sulfate	g__Hongsoonwoonella	0.462875	0.802502	0	0	0	0	0	0	0	0	0	0	0	0	0	0	0	0	0	0	13.8863	0	0	0	0	0	0	0	0	0	0	0	0	0	0	0	0	0	0	0	0	0	0
Glycosaminoglycan biosynthesis - chondroitin sulfate / dermatan sulfate	g__Hoylesella	0.403744	0.699984	0	0	0	0	0	0	0	0.454481	0.143093	0	0	0	0	0	0	0	0	0.246142	0	0	0	0	0.444086	1.25555	0.1524	1.83104	0	1.79798	0.476251	1.24613	3.94409	0.121076	0	0	0	0	0	0	0	0	0
Glycosaminoglycan biosynthesis - chondroitin sulfate / dermatan sulfate	g__Lacipirellula	0.692228	1.20014	0	0	0	0	0	0	0	0	0	0	0	0	0	0	0	0	0	0	20.7668	0	0	0	0	0	0	0	0	0	0	0	0	0	0	0	0	0	0	0	0	0	0
Glycosaminoglycan biosynthesis - chondroitin sulfate / dermatan sulfate	g__Lactococcus	0	0	0.796443	4.28271	0	0	0	0	0	0	0	0	0	0	0	0	0	0	0	0	0	0	0	0	0	0	0	0	0	0	0	0	0	0	0	0.128017	0	2.87675	2.57844	0	0	1.03031	0.554473
Glycosaminoglycan biosynthesis - chondroitin sulfate / dermatan sulfate	g__Marmoricola	0.442308	0.766844	0.0487113	0.261935	0	0	12.774	0	0	0	0	0	0	0	0	0	0.495284	0	0	0	0	0	0	0	0	0	0	0	0	0	0	0	0	0	0	0	0	0	0	0	0	0.438402	0
Glycosaminoglycan biosynthesis - chondroitin sulfate / dermatan sulfate	g__Methyloceanibacter	0.512816	0.889085	0	0	0	6.98239	0	0	5.53111	0	0.21464	0	0	0	1.0153	0	0.419303	0	0	0.553818	0	0	0	0.43932	0	0	0.2286	0	0	0	0	0	0	0	0	0	0	0	0	0	0	0	0
Glycosaminoglycan biosynthesis - chondroitin sulfate / dermatan sulfate	g__Microlunatus	0.14748	0.255691	0.494123	2.65704	0	0	4.00981	0	0	0	0	0	0	0	0	0	0.414592	0	0	0	0	0	0	0	0	0	0	0	0	0	0	0	0	0	0	0	0	0	0	1.51129	0	2.93582	0
Glycosaminoglycan biosynthesis - chondroitin sulfate / dermatan sulfate	g__Microvirga	0.284583	0.49339	0	0	0	0	0	0	0	0	0	0	0	0	0	0	0	0	0	0	8.53748	0	0	0	0	0	0	0	0	0	0	0	0	0	0	0	0	0	0	0	0	0	0
Glycosaminoglycan biosynthesis - chondroitin sulfate / dermatan sulfate	g__Monosiga	0.425822	0.738261	0	0	0	0	0	0	0	0	0	0	0	0	11.6309	0	0	0	0	0	0	0	0	1.14379	0	0	0	0	0	0	0	0	0	0	0	0	0	0	0	0	0	0	0
Glycosaminoglycan biosynthesis - chondroitin sulfate / dermatan sulfate	g__Niastella	0.161091	0.279289	0	0	0	0	0	0.157889	0	0.251011	0	0.941303	0	0	0	0.151216	0	0	0	0.407833	0	0	0	0	0	0	0	0.842738	0	0.18055	0	1.68236	0.217833	0	0	0	0	0	0	0	0	0	0
Glycosaminoglycan biosynthesis - chondroitin sulfate / dermatan sulfate	g__Nitratidesulfovibrio	2.67896	4.6446	0.00464372	0.0249706	1.69234	0	0	1.71417	0	3.66072	0.935302	2.25001	16.5412	0	0	0.522089	0.534072	0.0665808	2.36697	1.85216	0	1.10106	0.165909	8.72971	9.71366	7.02503	0	1.24965	4.12168	0.673236	6.50238	1.98052	2.96494	4.0055	0	0.0417934	0	0	0	0	0	0	0
Glycosaminoglycan biosynthesis - chondroitin sulfate / dermatan sulfate	g__Nocardioides	0.237613	0.411958	1.48509	7.98579	0.329672	0	4.17395	0	0	0	0	0	0	0	0	0	0	0.37807	0	0	2.24671	0	0	0	0	0	0	0	0	0	0	0	0	0	0	0	6.96413	0.852271	0.173612	2.02158	0.651587	2.292	0.410672
Glycosaminoglycan biosynthesis - chondroitin sulfate / dermatan sulfate	g__Olivibacter	0	0	1.19807	6.44237	0	0	0	0	0	0	0	0	0	0	0	0	0	0	0	0	0	0	0	0	0	0	0	0	0	0	0	0	0	0	0	0	0	10.0964	0	0.686248	0	0	0
Glycosaminoglycan biosynthesis - chondroitin sulfate / dermatan sulfate	g__Paenibacillus	0	0	0.635134	3.41531	0	0	0	0	0	0	0	0	0	0	0	0	0	0	0	0	0	0	0	0	0	0	0	0	0	0	0	0	0	0	0	0.133054	0	0.149497	0.243626	2.77199	1.26547	0	1.15258
Glycosaminoglycan biosynthesis - chondroitin sulfate / dermatan sulfate	g__Parabacteroides	3.36522	5.83439	2.61525	14.063	0.640614	0	0	0	0	5.45377	1.00165	2.55649	0.204093	0	0	0.273792	0	0	2.61056	3.32385	0	14.1741	3.05108	3.51512	0.592115	0.837037	0	0.45834	0.333763	38.4113	5.23967	3.18455	10.847	4.24778	0	0.166317	0	14.0407	0	1.49393	0	4.30752	3.52879
Glycosaminoglycan biosynthesis - chondroitin sulfate / dermatan sulfate	g__Paracoccus	0.234277	0.406174	0	0	0	0	0	0	0	0	0	0	0	0	0	0	7.02831	0	0	0	0	0	0	0	0	0	0	0	0	0	0	0	0	0	0	0	0	0	0	0	0	0	0
Glycosaminoglycan biosynthesis - chondroitin sulfate / dermatan sulfate	g__Pedobacter	13.5714	23.5292	0	0	16.6033	0	0	208.708	0	43.0419	0	19.1072	1.6607	0	0	0.866382	0	1.32842	0.363113	35.2724	0	1.8307	0	0.132398	0	0	19.1523	4.96638	0.150593	0	0	38.3056	0	15.6536	0	0	0	0	0	0	0	0	0
Glycosaminoglycan biosynthesis - chondroitin sulfate / dermatan sulfate	g__Pegethrix	0	0	0.21347	1.14789	0	0	0	0	0	0	0	0	0	0	0	0	0	0	0	0	0	0	0	0	0	0	0	0	0	0	0	0	0	0	0	0	0	0	0	0	0	1.92123	0
Glycosaminoglycan biosynthesis - chondroitin sulfate / dermatan sulfate	g__Photobacterium	0.258787	0.448666	0	0	5.10557	0	0	0	0	0	0	0.33958	0	0	0	2.31845	0	0	0	0	0	0	0	0	0	0	0	0	0	0	0	0	0	0	0	0	0	0	0	0	0	0	0
Glycosaminoglycan biosynthesis - chondroitin sulfate / dermatan sulfate	g__Rhodobium	0.261653	0.453635	0	0	0	3.87259	0	0	0	0	0	0.378103	0	0.288486	3.00323	0	0	0	0	0	0	0	0	0	0	0	0	0	0	0	0	0.307169	0	0	0	0	0	0	0	0	0	0	0
Glycosaminoglycan biosynthesis - chondroitin sulfate / dermatan sulfate	g__Rickettsia	0.398758	0.691339	0	0	0	0	0	0	0	0	0	0	0	0	0	1.72098	0	0	0.25245	0	9.72624	0	0	0	0	0.263069	0	0	0	0	0	0	0	0	0	0	0	0	0	0	0	0	0
Glycosaminoglycan biosynthesis - chondroitin sulfate / dermatan sulfate	g__Rubellimicrobium	0.367995	0.638004	0.0490803	0.263919	0	0	0	0	0	0	0	0	0	0	0	0	0	0	0	0	11.0398	0	0	0	0	0	0	0	0	0	0	0	0	0	0	0	0	0	0	0.441723	0	0	0
Glycosaminoglycan biosynthesis - chondroitin sulfate / dermatan sulfate	g__Ruminococcus	0	0	1.16454	6.26209	0	0	0	0	0	0	0	0	0	0	0	0	0	0	0	0	0	0	0	0	0	0	0	0	0	0	0	0	0	0	0	0	0	0	0	10.4809	0	0	0
Glycosaminoglycan biosynthesis - chondroitin sulfate / dermatan sulfate	g__Seminavis	0.54986	0.953309	0	0	0	0	0	0	0	0	0	0	0	0	16.2448	0	0	0	0	0	0	0	0	0.25104	0	0	0	0	0	0	0	0	0	0	0	0	0	0	0	0	0	0	0
Glycosaminoglycan biosynthesis - chondroitin sulfate / dermatan sulfate	g__Sphaeroforma	0.384285	0.666246	0	0	0	0	0	0	0	0	0	0	0	0	11.5285	0	0	0	0	0	0	0	0	0	0	0	0	0	0	0	0	0	0	0	0	0	0	0	0	0	0	0	0
Glycosaminoglycan biosynthesis - chondroitin sulfate / dermatan sulfate	g__Spirochaeta	0	0	0.277744	1.49351	0	0	0	0	0	0	0	0	0	0	0	0	0	0	0	0	0	0	0	0	0	0	0	0	0	0	0	0	0	0	0	0	0	0	0	0	0	0	2.49969
Glycosaminoglycan biosynthesis - chondroitin sulfate / dermatan sulfate	g__Streptococcus	2.37797	4.12276	0	0	1.02498	0	0	0.457399	0	0.272689	0	0	0	0.41612	0	0.766617	0	0	0	1.67376	0	0	0	0	0	0	0	0.488278	0	0	0	0.664601	0	65.5747	0	0	0	0	0	0	0	0	0
Glycosaminoglycan biosynthesis - chondroitin sulfate / dermatan sulfate	g__Sulfurihydrogenibium	0.439272	0.76158	0	0	0	0	0	0.240353	0	0	0.240616	0	0.343188	0	0	0	0	0	4.38973	0	0	0	0	0.492486	0	2.46313	0	0	0.560168	0	0.80083	0	3.64766	0	0	0	0	0	0	0	0	0	0
Glycosaminoglycan biosynthesis - chondroitin sulfate / dermatan sulfate	g__Telmatospirillum	0.273555	0.474271	0	0	0	0	0	0.143299	0	0.0949233	0.0956371	0.0284774	0	0	0	0	0	0	2.58362	0.0616912	0	0.338332	0	0.367027	3.14121	0	0	0.101982	0.445298	0	0.0397881	0	0.724914	0.0404608	0	0	0	0	0	0	0	0	0
Glycosaminoglycan biosynthesis - chondroitin sulfate / dermatan sulfate	g__Thomasclavelia	0.215911	0.374332	0	0	0	0	0	0	0	0.430047	0	0.32254	0	0	0	0.129536	0	0	0	0	0	0	0	0	3.22161	0	0	0.144383	0.78805	0	0	1.44116	0	0	0	0	0	0	0	0	0	0	0
Glycosaminoglycan biosynthesis - chondroitin sulfate / dermatan sulfate	g__Vibrio	4.24058	7.35203	0	0	20.4656	5.23045	0	4.16094	3.70143	0.456209	4.02185	7.1854	0	0	0	32.0171	0.280598	3.68726	0	3.21201	0	4.06513	0	0	0	0	0.917878	0	0	32.6507	0.239031	2.91869	0.791817	1.21536	0	0	0	0	0	0	0	0	0
Glycosaminoglycan biosynthesis - chondroitin sulfate / dermatan sulfate	g__unclassified_p__Candidatus_Jorgensenbacteria	0.302032	0.523642	0	0	0	0	0	0	0	0	0	0	1.18419	0	0	0	0	0	0.582577	0	0	0	0	0.849674	3.00612	0.607082	0	0	1.44967	0	1.38165	0	0	0	0	0	0	0	0	0	0	0	0
Glycosaminoglycan biosynthesis - chondroitin sulfate / dermatan sulfate	g__unclassified_p__Candidatus_Saccharibacteria	0	0	0.180831	0.972382	0	0	0	0	0	0	0	0	0	0	0	0	0	0	0	0	0	0	0	0	0	0	0	0	0	0	0	0	0	0	0	0	0	0	0	0	0	0	1.62748
Glycosaminoglycan degradation	g__Acetatifactor	6.28159	0.42657	6.64559	0.671309	3.46419	0	0	6.30724	0	2.06647	0.534263	7.37873	1.61214	1.61382	0.609871	4.00833	0.251868	0.913327	2.025	2.61407	0	0	2.51631	1.05557	2.26366	2.79004	0.210071	9.31837	1.24205	0.462336	5.38564	4.79875	4.46258	120.543	0.135605	4.99373	1.34786	2.2899	16.2923	9.6514	17.2698	4.60271	3.22707
Glycosaminoglycan degradation	g__Akkermansia	20.6009	1.39897	72.2099	7.29434	0.199201	0	0	8.90459	0	3.91869	0.944417	6.09029	27.0643	0.152872	0	5.71651	0.0965933	1.81428	4.90922	1.47058	0	5.78685	0.993787	0.133664	51.708	1.28017	0.499013	67.0769	423.506	0.404544	3.14183	1.96451	0.162694	0.0890363	0	0.796173	144.179	26.0032	0.641269	0.830439	21.4444	5.7807	450.214
Glycosaminoglycan degradation	g__Alistipes	29.3619	1.99391	1.66164	0.167852	7.68816	1.34116	0	16.7696	0	124.895	22.6696	46.4667	3.64614	0.272459	3.29833	8.54141	0.98998	10.1536	69.6627	29.9427	5.06303	100.969	2.89658	3.04438	6.53874	42.8094	1.60352	125.67	22.7939	26.9316	66.0979	18.3744	84.9939	26.7332	0	0.690367	0	0.345712	3.46095	0	0.318543	6.24063	3.89855
Glycosaminoglycan degradation	g__Amedibacillus	3.85253	0.261617	10.0376	1.01395	2.54477	0	0	0.70643	0	0.740035	2.98237	1.32336	0.154681	9.31341	0	15.096	0.282478	28.1181	0.17756	0.739404	0	0.639432	0.256933	0.758406	0.61296	1.13083	1.7133	0.458368	1.72597	1.07362	0	5.57915	29.4188	10.0294	0.482313	42.559	7.47496	18.1922	0.0381055	0.89525	3.27401	11.7897	5.63276
Glycosaminoglycan degradation	g__Amedibacterium	0.11129	0.00755747	12.4651	1.25917	0.386123	0	0	0	0	0	0	0	2.49105	0	0	0	0	0	0.272335	0	0	0	0	0	0	0.189193	0	0	0	0	0	0	0	0	0	51.7929	16.6951	26.6475	0.062971	7.82328	5.94637	1.20212	2.01599
Glycosaminoglycan degradation	g__Anaerocolumna	4.25379	0.288866	7.26777	0.734159	27.3449	0.634763	0	21.8491	0	2.39308	2.16234	3.79737	0	0	0	0	0	0	7.44394	15.9854	0	0	0	0.637286	0.0827957	9.80667	0.171939	7.7095	8.63315	0	0.758665	4.12935	0	14.0733	0.112283	6.68046	0	0.557028	18.1359	16.1192	14.3697	4.34272	5.09262
Glycosaminoglycan degradation	g__Anaeromassilibacillus	3.64445	0.247487	6.64727	0.671479	1.33272	0.702251	0	3.57864	0	3.73486	3.3351	3.48976	4.32304	1.13675	0.788928	8.37045	7.43484	4.77033	2.45763	1.66534	0	0	5.85055	6.68638	6.12383	2.28163	2.23355	2.20724	13.4083	0.292527	1.5659	6.47269	9.03441	6.05572	0.160451	12.3518	1.82477	4.35326	16.4141	5.78345	7.08085	2.01878	9.83797
Glycosaminoglycan degradation	g__Anaerorhabdus	11.3859	0.773194	12.408	1.2534	4.52803	0	0	2.72786	0	1.80697	88.7524	16.7147	37.0022	0	1.7941	32.7297	2.371	0	0.532274	0.782908	0	3.75698	3.23488	1.86314	21.4231	2.99518	0	0.485336	13.5981	22.8754	1.51482	19.6711	53.421	6.99614	0.845698	3.34816	45.8787	34.5212	0	11.8068	11.2811	3.3727	0.617658
Glycosaminoglycan degradation	g__Bacteroides	174.649	11.86	94.2952	9.5253	64.0626	3.05435	0	476.135	0.330664	579.452	521.815	289.686	28.7678	5.2782	46.1032	63.4406	1.45083	40.2488	177.176	721.617	2.22018	221.53	14.9466	19.5048	26.7831	100.442	8.87954	623.693	57.6445	116.848	109.501	487.135	119.978	311.746	0	15.6855	14.0412	141.99	8.74735	112.389	9.58855	337.502	208.713
Glycosaminoglycan degradation	g__Bifidobacterium	46.0176	3.12496	0.468053	0.0472807	104.06	2.95926	238.332	0	6.39323	27.2641	18.3921	41.8423	28.7803	82.3075	6.90228	22.0894	120.971	67.707	2.45943	37.8394	0	179.281	131.191	37.9831	0	11.0295	44.5318	2.18699	26.2607	90.0058	32.5886	0.512127	13.8589	2.79895	0	0	2.8443	0	0	0.0378247	0.422099	0	0.908249
Glycosaminoglycan degradation	g__Blautia	4.43283	0.301024	12.0095	1.21314	3.09	0.291485	0	9.5558	0	2.4185	2.20718	10.868	1.9368	1.56748	3.28335	3.01505	2.69997	1.58592	6.89756	9.67527	0.729007	0	7.7483	1.90225	6.0746	7.96093	0.546764	6.00706	3.78806	0.941861	3.77537	7.886	8.30737	18.225	1.18101	11.6675	1.11833	9.90424	12.4598	21.5088	15.2525	10.3574	24.6356
Glycosaminoglycan degradation	g__Breznakia	101.413	6.88675	2.98334	0.301364	249.743	7.11719	540.132	0.978479	6.57754	54.8851	42.8804	98.7013	45.5101	205.751	1.86144	70.5949	283.681	190.116	0.219068	79.8354	0	360.318	232.944	67.5321	1.34457	21.9867	98.0935	3.40693	45.9541	192.521	43.9328	8.13809	67.0249	20.6122	3.92246	0	9.72492	0	0	4.66041	3.5814	0	4.96088
Glycosaminoglycan degradation	g__Candidatus_Avirikenella	14.3648	0.975485	0	0	3.87015	0	0	8.10128	0	30.0758	15.2367	12.16	4.08686	0.612073	0.480356	11.5177	0	4.33898	46.2133	15.0629	0	39.6425	4.25623	3.92889	6.17659	18.6197	1.50756	57.4995	7.60642	2.68506	31.3461	16.7135	85.8176	3.38888	0	0	0	0	0	0	0	0	0
Glycosaminoglycan degradation	g__Candidatus_Gallacutalibacter	3.70739	0.251761	6.38047	0.644528	2.88965	0.738522	0	10.4554	0	4.50242	3.55684	3.82749	4.80251	2.25032	0.286366	6.17748	4.80501	4.50121	2.20894	2.54818	0	1.39573	3.44225	4.7476	3.74187	2.04151	1.21839	1.15695	22.5274	0.183874	0.607465	5.00842	2.44433	9.1554	0.349443	3.38241	9.03067	6.3013	9.4493	2.94772	13.7974	6.98622	5.17978
Glycosaminoglycan degradation	g__Clostridium	115.112	7.81698	79.6219	8.04307	194.535	44.5126	260.733	38.6774	7.75195	50.8838	202.103	178.564	131.37	244.147	20.9614	121.011	287.408	141.147	59.8812	57.8184	17.689	259.786	136.793	121.878	199.473	67.3248	66.4881	100.665	76.8359	108.088	54.937	65.8133	82.7264	53.343	20.9157	42.9819	63.9876	108.7	127.216	131.597	100.453	54.9265	65.8194
Glycosaminoglycan degradation	g__Collinsella	45.9456	3.12007	0.148696	0.0150206	110.195	2.83942	255.286	0	3.37388	23.5919	13.756	44.5369	25.0977	92.4876	0	20.2748	121.268	77.3768	0	34.0221	0	201.573	116.629	32.586	0	10.4158	38.7091	2.04765	19.792	90.4903	24.2862	0.810789	13.7613	3.16095	0	0	0	1.33826	0	0	0	0	0
Glycosaminoglycan degradation	g__Coprobacillus	0.168861	0.011467	9.78891	0.988834	1.14272	0	0	1.01988	0	0.810696	0.510495	0.304015	0	0	0	0	0	0.436824	0	0	0	0	0	0	0	0	0	0	0.594232	0	0	0.24698	0	0	0.590096	8.79181	14.9706	24.9496	1.32689	9.36358	15.4815	2.67361	9.95255
Glycosaminoglycan degradation	g__Desulfovibrio	9.55139	0.648615	12.9568	1.30884	4.54925	0	0	6.29799	0	74.757	2.51781	5.42513	8.64633	0	0	3.74758	3.52181	0.316401	31.7582	16.5606	0	1.07384	9.53657	8.28595	12.8642	19.595	0.0792001	12.7048	2.5247	0.717441	29.5263	7.004	7.17709	17.3546	10.17	10.8891	11.0837	0.448785	2.39293	6.9568	3.13995	42.5786	28.9514
Glycosaminoglycan degradation	g__Eisenbergiella	6.46273	0.438871	15.7237	1.58834	7.7323	0	0	12.7528	0	2.69972	1.62734	10.7338	2.64968	2.6496	22.4271	3.42435	0	1.59562	11.7618	11.9635	0	0	11.2991	2.03427	1.92444	14.4202	0.913517	14.7328	10.3283	0	11.1423	7.90268	3.36296	23.8038	5.40133	11.6364	1.25569	3.69376	26.3311	29.0249	15.6933	18.6701	29.8062
Glycosaminoglycan degradation	g__Faecalibacillus	0.301806	0.020495	17.0098	1.71826	0	0	0	0	0	0	0	0	0	0.199592	0	0	0.429054	0	0	0	0	0	1.56102	1.57338	0	0.963565	0	0	0.255658	0	2.55847	0	1.51343	0	0.195738	107.479	0	33.303	1.67157	5.7203	0.961757	0.19408	3.56236
Glycosaminoglycan degradation	g__Flavobacterium	10.4398	0.708943	1.24029	0.125289	5.08176	1.71634	0	7.76263	0	47.693	19.467	15.5291	6.19136	1.99704	0	13.5068	0	1.92296	23.6805	17.3623	0	20.7478	0.141686	3.26367	1.39549	15.7562	1.11341	66.3235	7.45743	1.41734	14.2831	5.13522	9.34117	4.90613	0	0	0	0	0	0	0	0	11.1626
Glycosaminoglycan degradation	g__Fusobacterium	20.7379	1.40827	4.48231	0.452784	5.32973	0	0	27.8552	0	2.63381	116.409	18.3327	53.1615	59.5397	43.6806	55.8899	3.69439	1.41017	0.58159	0.787219	0	10.5971	4.25808	5.1547	24.0159	6.20351	1.04966	4.54836	26.2096	35.4035	3.18211	39.8367	63.4514	8.92095	0.756703	4.59746	0	0	4.24605	19.1731	0	10.7828	0.784678
Glycosaminoglycan degradation	g__Hespellia	0	0	10.8434	1.09536	0	0	0	0	0	0	0	0	0	0	0	0	0	0	0	0	0	0	0	0	0	0	0	0	0	0	0	0	0	0	0	66.8123	0.439449	23.4683	0	4.29511	2.57567	0	0
Glycosaminoglycan degradation	g__Hungatella	5.7717	0.391944	24.4904	2.47392	3.33487	0	0	5.60887	0	7.0493	1.73003	14.8974	2.86272	0.795505	4.19697	2.44122	0.392539	1.64614	27.9757	2.16766	0.630848	0.422247	1.84653	7.60146	7.84292	5.21603	0.437663	7.99142	7.55397	0.216298	6.15361	4.06746	2.2038	45.868	2.79503	9.59909	21.3306	12.4215	31.8449	45.7394	55.6278	25.6495	15.406
Glycosaminoglycan degradation	g__Kineothrix	1.94082	0.131797	16.3084	1.64741	0.631173	0	0	2.40999	0	2.36641	0.0795298	6.50965	0.460302	2.22631	0.76692	1.12836	0	0.544421	12.5786	0.0697225	0	0.68534	4.60986	0.737225	2.41769	2.08836	0.255743	2.45147	3.53931	0	4.98364	2.7253	0.604648	3.35454	4.58531	11.3912	0.374723	3.50767	46.0268	29.2804	12.2667	12.0509	27.292
Glycosaminoglycan degradation	g__Lachnoclostridium	2.96261	0.201184	17.1034	1.72771	1.81895	0	0	1.34904	0	3.54688	1.31737	6.24375	3.89244	2.25562	1.76573	1.33442	1.02705	2.21089	3.74263	0.228456	0	0.899941	7.54578	1.26002	5.42134	4.02348	0.930458	5.43211	13.9949	0.329073	7.89858	5.09164	1.91939	3.39819	0.57539	6.56118	8.57042	22.076	14.1173	30.3712	29.8435	9.78443	32.0311
Glycosaminoglycan degradation	g__Lacrimispora	2.35194	0.159715	13.9805	1.41225	0.147963	1.61273	0	1.78278	0	1.25966	2.8506	5.43041	1.44461	1.05873	0.469009	5.21713	5.81081	3.56339	3.26992	0.063958	0	0	4.33398	5.54197	6.38505	2.31998	1.7952	1.87125	1.70237	0	2.59876	2.81743	1.81055	5.40005	1.77525	22.4098	3.28863	7.05234	31.2395	24.2312	16.4601	16.0197	3.34811
Glycosaminoglycan degradation	g__Listeria	0.566869	0.0384949	13.5538	1.36914	0	6.06365	0	0	0	0	0.497061	0.59203	1.41791	0	0	0	3.88407	0	0	0	0	0	0.706567	0	0	0.7269	1.58817	0	0	0.567782	0	0.961923	0	0	0.0788332	20.9016	46.8352	7.90893	4.07326	6.1272	20.2093	15.3716	0.477851
Glycosaminoglycan degradation	g__Longicatena	0	0	18.176	1.83606	0	0	0	0	0	0	0	0	0	0	0	0	0	0	0	0	0	0	0	0	0	0	0	0	0	0	0	0	0	0	3.11569	81.5976	4.2453	40.1169	0.0990232	8.78303	4.28709	20.3922	0.946731
Glycosaminoglycan degradation	g__Mailhella	7.65913	0.520115	5.47909	0.553474	7.0649	0	0	13.9511	0	11.741	3.79995	5.76878	3.05296	0.230249	0	3.12669	6.46386	3.59398	15.7427	18.2875	0	1.50362	4.69997	14.3837	20.1453	32.9932	3.72012	5.38724	1.49625	0.268887	29.0312	3.39562	5.44395	14.4811	0.385252	0.0997087	1.10605	1.10693	0	0	14.7219	7.89742	23.9946
Glycosaminoglycan degradation	g__Mediterraneibacter	6.82716	0.463618	11.2918	1.14065	1.26644	0.438893	0	1.63513	0	0.776561	2.46623	6.78508	16.5459	3.89357	1.27721	12.0771	5.90755	7.04651	55.1608	4.31322	0	1.08873	1.98619	9.61907	12.136	28.8001	2.6653	1.54804	4.04227	0.853904	3.90587	6.2055	4.54082	7.83271	1.18538	5.66559	25.6364	20.5418	1.85718	7.04099	10.1375	10.2315	19.3296
Glycosaminoglycan degradation	g__Merdibacter	54.2962	3.68714	3.18747	0.321984	131.61	5.74253	306.844	0	10.4626	31.3974	23.2309	49.1994	33.134	123.395	0	29.3177	140.284	88.0932	0	47.0659	0	179.854	129.279	53.8352	0	11.0489	50.0853	2.10826	30.0004	102.837	30.0813	0.819882	14.4995	4.66018	0.141961	1.15544	3.44992	8.38131	2.55504	5.07464	0.926327	1.31551	5.68706
Glycosaminoglycan degradation	g__Methyloceanibacter	15.4783	1.0511	0.401715	0.0405795	0.325861	190.811	0	1.15053	139.971	0	2.38411	1.48583	1.2482	5.42449	56.875	1.73755	7.53014	0	0.875879	0.862587	40.8328	3.14548	0.540795	2.20677	0.574357	0.592642	0	0	1.60861	1.67022	0	1.58967	0.506731	0.398931	0	0	2.5367	0.25616	0.208724	0	0	0.366977	0.246865
Glycosaminoglycan degradation	g__Millionella	15.7262	1.06793	1.74206	0.175975	5.3466	0.867868	0	5.55522	0	46.1382	18.2058	23.678	5.58564	0.368108	0.239534	10.0296	0.395569	7.39007	63.1026	16.8108	0	29.634	3.58889	4.09665	6.1323	24.5708	1.70294	66.0262	7.30245	7.16852	29.973	14.9141	51.7206	21.2418	0	0	0	0	0.0449249	0	0.781966	0	14.8516
Glycosaminoglycan degradation	g__Mucinivorans	33.801	2.29536	10.367	1.04723	12.0093	0.417426	0	17.8675	0	87.8111	55.7897	57.3185	14.2122	1.08702	3.91335	26.4924	2.57825	5.31804	169.41	27.6989	1.04399	75.2134	2.51736	8.4891	13.2349	57.5503	2.86427	146.495	22.8057	20.8763	77.8385	20.616	64.862	17.6996	0	0	0.241462	0.183857	0.582944	0	1.09944	2.53762	88.6575
Glycosaminoglycan degradation	g__Neglectibacter	5.15281	0.349917	5.53795	0.55942	4.25701	0	0	0.934035	0.428466	3.79143	2.53971	5.67142	21.2075	0.18132	0	1.27334	1.19333	0.740535	13.9906	7.34914	0	1.09993	0.72559	7.28766	13.9767	15.0915	1.10116	2.05287	13.6589	0.633402	4.68956	4.98905	19.9374	5.78286	0.383896	8.95076	0.317981	15.1093	6.83967	2.93046	8.29301	5.16794	1.84854
Glycosaminoglycan degradation	g__Nocardioides	3.57261	0.242608	7.50054	0.757672	0.971965	10.4037	18.1941	0.618545	29.7724	0	0	0	0	0.184569	13.5423	0.384474	8.37601	17.3872	0.849008	0	4.39774	0	0	1.03498	0	0.587707	0	0	0.236415	0.237096	0	0	0	0	0	0	30.9399	2.14891	1.5735	4.37102	2.9428	22.7137	2.81503
Glycosaminoglycan degradation	g__Odoribacter	12.8936	0.87558	2.72237	0.275002	1.82969	0	0	8.44583	0	66.9973	3.08721	10.3055	8.09096	0.170822	0	6.72367	0	16.0169	13.4917	4.09494	0	22.391	13.1641	2.25261	29.9299	33.5931	0.5786	59.64	24.5539	2.86672	41.9579	5.20827	6.72632	4.69228	0	2.21714	0.0424573	0.686016	1.0354	0.794816	0.283665	18.9795	0.462314
Glycosaminoglycan degradation	g__Oscillibacter	11.1176	0.754972	15.1038	1.52572	6.91171	1.84986	0	9.81805	0	9.60721	4.93642	15.2815	6.50201	4.30047	0.57923	15.9572	9.19799	19.2741	23.2407	5.27256	0.622669	0	44.5985	16.7404	25.4804	20.0071	4.00067	8.69497	5.10911	0.656315	20.9684	10.3229	14.4431	29.154	2.65359	7.52425	41.6976	16.4597	6.86391	20.3685	17.6609	2.69464	20.0108
Glycosaminoglycan degradation	g__Paenibacillus	8.75649	0.594635	12.3449	1.24703	8.64736	0	0	10.47	0	5.04168	2.64108	16.4033	10.2282	4.15754	7.29695	5.99389	0.704173	3.09332	7.62338	11.4585	0.740244	1.91438	15.5882	8.05511	18.1981	23.4404	0.833744	15.2276	11.882	0.717038	23.306	11.2507	17.7463	20.0354	1.00002	25.7491	2.98047	18.7261	17.7389	11.9104	14.8548	7.78443	10.3603
Glycosaminoglycan degradation	g__Paludihabitans	9.10219	0.61811	11.961	1.20825	2.31759	0	0	2.08009	0	4.12779	3.29163	8.86565	16.4106	2.12894	2.01366	3.58705	0.399758	2.17999	59.6341	0.722015	1.14341	1.647	2.695	6.73358	8.38631	84.6016	0.196967	5.43219	33.0734	0.784432	7.02854	4.44082	3.66604	5.47747	0	9.14777	0	0.489393	19.3019	0.48877	33.583	23.5541	21.0839
Glycosaminoglycan degradation	g__Parabacteroides	41.8912	2.84474	49.8524	5.03587	8.78454	0	33.4971	24.7003	0	111.065	26.8633	50.3231	6.84594	0.682527	5.25566	19.3337	0.288038	14.6946	70.9638	46.1382	0	76.2259	18.9558	18.5147	12.5362	39.3654	1.20254	99.3999	14.5859	236.805	57.7879	63.0197	162.655	36.2448	0.249821	0.343565	0.714226	158.825	0.49906	13.3758	9.07137	190.032	75.5605
Glycosaminoglycan degradation	g__Phocaeicola	5.92245	0.402181	13.5521	1.36897	2.67116	0	0	7.20343	0	14.2479	7.97365	8.6409	2.01543	0.0534733	0.228799	2.65656	0.100678	2.27026	16.2696	7.6284	0	5.63073	0.974483	2.22206	4.07041	11.4597	0.235342	30.015	5.10993	9.46119	14.2731	7.10623	12.0884	3.06671	0	1.26719	17.6948	13.6559	0.527092	3.67313	3.79818	37.8324	43.5199
Glycosaminoglycan degradation	g__Photobacterium	14.0044	0.951009	0	0	161.871	5.99548	0	2.46573	0	22.4197	5.49962	27.0636	0.330405	0	0	78.3207	1.00358	8.13093	0.552181	3.26604	0	2.52635	0	0	0	0	8.80066	0	3.41489	0	0	19.572	66.8494	2.04994	0	0	0	0	0	0	0	0	0
Glycosaminoglycan degradation	g__Rikenella	37.4207	2.54116	4.79539	0.48441	16.1569	1.10743	0	20.4448	0	141.532	57.0424	61.4639	19.1436	2.62271	5.92219	42.4394	1.60954	14.0066	105.862	50.5372	0	110.567	4.574	9.34878	7.71099	51.5819	5.10796	180.718	20.7306	11.7605	73.4493	30.5685	63.886	12.728	0	0.0556673	0	0	0.16591	0	0.299109	0.593836	42.044
Glycosaminoglycan degradation	g__Robinsoniella	0.538769	0.0365867	14.084	1.42271	1.56266	0	0	0	0	0.116263	0.0796976	0.576147	0	1.99251	0.955574	0	0	0	0	0	0	0.563887	0	0.0815616	0.481257	0.116549	0	0.254955	0.0927704	0.167254	0.734058	5.81584	2.5721	0	4.06701	7.32439	8.75673	13.1461	58.4018	7.67452	8.39924	11.7189	7.26749
Glycosaminoglycan degradation	g__Ruthenibacterium	17.3408	1.17758	19.3356	1.9532	8.78854	2.04573	0	8.9606	0	7.38947	7.48191	35.5071	19.7054	11.1698	8.5896	32.0572	13.637	21.7332	74.6775	9.43109	0.619656	2.36395	16.1999	21.5416	25.7443	43.984	4.34165	10.8948	11.2271	2.00739	35.3078	23.2078	23.8373	37.7737	0.83463	20.2981	1.18484	9.00934	39.6241	4.88626	37.8676	30.5872	29.7285
Glycosaminoglycan degradation	g__Thomasclavelia	176.434	11.9812	45.1754	4.56342	393.679	11.4692	920.998	18.0842	14.7231	95.1192	61.4117	151.802	88.7245	417.879	1.22771	137.931	432.179	327.047	1.53931	159.878	0	700.801	384.489	118.785	1.39497	41.3574	155.473	8.22122	72.7736	309.502	89.8329	19.6431	116.664	40.382	4.39501	54.7079	92.7999	83.4767	10.8732	34.6004	37.0623	15.0431	73.62
Glycosaminoglycan degradation	g__Treponema	5.06535	0.343977	7.86151	0.794136	1.43931	0	0	5.82009	0	5.2955	2.46714	14.4514	1.36476	1.49732	0	6.0719	3.72207	24.3782	0	2.05984	3.18827	0	1.81737	7.65708	4.85955	1.04856	1.69707	0.655731	3.42859	1.04342	42.8461	6.74227	2.39568	6.01339	1.97805	8.05543	1.0015	10.5929	2.56458	1.43313	3.29968	14.7735	27.0548
Glycosaminoglycan degradation	g__Vibrio	11.9105	0.808819	0	0	41.5985	3.42901	0	8.16339	48.469	1.71617	10.8484	19.1919	1.23368	0.353726	8.12238	78.6996	0.511127	22.6068	1.08258	8.8295	0	4.42453	0	0.630506	0	0	3.34759	0.572845	2.06523	69.8242	0.890151	11.5964	5.76128	3.34741	0	0	0	0	0	0	0	0	0
Homologous recombination	g__Akkermansia	22.0271	0.191001	90.5404	1.0678	0.273366	0	0	0	0	0.418902	0	3.06854	21.8268	0.10097	0	0	0	0	5.66915	1.82807	0	4.83932	0.463808	0	51.9444	0.425624	0	80.3121	488.186	0	0.871304	0	0.356589	0.228413	0.111822	0.951191	192.522	25.2526	1.42524	0.101936	28.4874	0	566.012
Homologous recombination	g__Alistipes	125.092	1.0847	3.49366	0.0412029	35.0607	2.64226	0	87.6141	0	513.211	135.096	194.124	40.4108	2.12952	10.502	81.0288	2.26397	40.7392	270.804	168.966	0	331.483	16.6872	23.9673	33.0899	200.769	9.58582	550.073	77.5308	72.7891	250.258	117.907	386.953	97.0831	0.638612	0	0	2.91624	7.24546	0	0.345066	6.18898	14.1086
Homologous recombination	g__Amedibacillus	15.8972	0.137848	144.723	1.70681	8.26377	0	0	0.243454	0	6.74757	20.9378	8.19153	9.61872	46.8319	4.49873	77.0558	3.41998	73.8036	2.97418	4.1132	0	8.05877	4.57279	4.73923	6.48187	8.37166	5.33623	5.28562	4.36366	4.79881	3.40518	28.5512	89.432	36.8178	72.6559	677.227	9.90444	224.475	5.8562	83.7381	69.0086	146.51	13.1322
Homologous recombination	g__Anaerorhabdus	351.283	3.04605	362.768	4.27835	108.84	9.91901	0	1370.58	0	163.664	1728.67	240.776	514.524	1176.51	669.782	722.338	88.2164	148.681	17.9741	20.613	1.82211	105.744	47.5854	85.585	288.502	63.2416	103.967	88.6175	290.108	487.108	31.6006	1027.56	791.735	144.229	22.2053	75.1507	1288.09	723.935	2.02673	287.183	765.603	44.3813	56.3402
Homologous recombination	g__Anaerotignum	49.0253	0.425108	60.9168	0.718429	39.7566	1.51069	0	139.088	0	22.3277	15.3903	196.611	15.6737	36.0646	23.7176	96.443	4.39306	79.1467	31.2565	2.19491	14.8264	6.70548	17.146	21.0808	20.7825	53.4633	76.703	57.7992	26.2422	12.9941	25.6595	57.2367	38.9054	337.639	26.8212	41.2026	54.1815	27.7706	143.211	103.371	40.1436	49.3378	62.2113
Homologous recombination	g__Anaerotruncus	98.0161	0.849917	148.821	1.75514	52.7998	9.33707	0	110.734	15.1057	110.212	27.5253	160.392	39.4608	6.84923	18.6765	84.9078	20.4211	57.9224	272.292	21.2406	3.78592	9.44034	442.841	60.199	190.878	224.432	17.9971	122.836	61.5911	7.84991	284.489	63.3048	153.711	289.25	23.9107	173.353	90.1292	64.4591	210.112	218.986	260.258	181.996	116.187
Homologous recombination	g__Angelakisella	45.5397	0.394884	128.791	1.51892	50.5047	3.11418	0	23.1006	0	58.7905	31.8542	161.457	13.9972	17.594	12.4508	17.5217	11.7115	59.056	153.715	2.28453	0	19.9649	70.451	26.5544	29.9294	96.2541	2.60932	98.5797	12.5751	10.5537	114.896	79.5214	126.186	60.9619	14.6371	219.429	5.57766	127.19	218.068	66.6037	322.502	146.64	38.4743
Homologous recombination	g__Bacteroides	192.305	1.66751	59.3737	0.700231	62.0188	3.31006	0	528.985	0	470.47	518.175	297.051	24.4792	5.06668	450.41	52.4326	0	43.4116	143.766	721.791	4.88269	213.576	21.0127	65.1967	48.3978	134.136	13.8556	637.084	64.0441	128.178	111.157	472.997	97.4248	435.829	0.160097	19.2103	1.71823	96.1698	20.8939	46.6293	12.5146	217.093	119.974
Homologous recombination	g__Bilophila	172.502	1.4958	180.262	2.12594	109.763	14.8657	0	209.636	0	196.858	74.0114	129.079	798.904	3.54176	2.86416	74.9098	76.7799	17.8792	508.011	324.178	7.23729	80.6059	75.8547	270.691	359.401	520.788	28.0199	199.632	137.918	57.7639	382.93	95.1268	257.894	159.903	44.2233	178.126	320.012	139.063	222.772	195.961	152.709	50.6352	318.856
Homologous recombination	g__Breznakia	1108.43	9.61146	28.4375	0.335382	2444.04	80.3262	5622.09	5.93487	79.1484	590.522	481.025	948.333	549.68	2659.82	18.313	1060.67	2617	2658.02	6.05746	861.263	1.91156	3709.72	2183.52	774.705	21.8891	241.337	1049.53	46.1627	447.283	1890.48	529.188	190.956	1117.11	366.994	80.8142	1.27741	66.7105	0	3.30917	7.27757	48.2256	0.361666	47.9617
Homologous recombination	g__Candidatus_Avidesulfovibrio	84.3051	0.731026	54.7793	0.646047	41.8913	0	0	119.984	0.587848	68.6176	46.5854	52.9577	431.062	1.67112	0.850916	37.2156	31.8524	2.50227	219.4	140.832	1.05837	22.908	4.17429	193.618	192.597	299.105	7.23707	51.5839	91.2439	26.3201	181.331	45.0655	138.678	78.2223	5.95824	50.9836	156.277	79.5158	5.98347	2.51067	75.5899	3.04605	113.15
Homologous recombination	g__Candidatus_Coprosoma	76.7287	0.66533	4.61021	0.0543711	135.544	0	0	948.857	0.993342	228.859	0.153252	128.835	50.8057	13.9087	0	8.71296	0.541477	16.4855	1.9996	220.485	0	16.0401	0	5.0127	20.7665	6.45989	102.716	41.1623	19.5763	0.215757	2.55951	245.376	0.633615	85.1601	0	0	0	11.3668	5.27855	0	21.6313	0	3.21526
Homologous recombination	g__Candidatus_Faecisoma	72.2905	0.626845	4.86029	0.0573204	82.7089	0	0	303.925	0	120.948	33.5413	278.962	97.4394	46.8864	1.99212	51.0686	28.6834	56.3796	13.4182	227.744	0	17.8581	0.865236	27.828	54.5371	74.7169	52.7723	38.3106	59.7278	0	8.70339	354.29	5.23228	130.175	5.02847	4.4844	0	20.9133	0	0	9.42989	0.821659	3.06489
Homologous recombination	g__Candidatus_Fimihabitans	77.8117	0.674721	7.54378	0.0889685	112.768	0	0	612.4	0	158.93	87.9338	109.434	83.872	54.5137	0	58.487	10.5812	63.8264	11.1969	176.653	0.528818	43.9966	0.323741	13.0482	81.2424	38.1647	62.8983	38.1869	47.7853	0.687698	7.57578	322.44	1.80257	135.072	0	0	0	35.0339	0	0.370765	3.71003	0	28.7794
Homologous recombination	g__Candidatus_Stoquefichus	49.5765	0.429888	51.3535	0.605644	10.7348	14.1891	0	98.649	0	54.2546	230.978	12.4032	13.3996	327.725	0.266705	203.597	0.303693	28.4203	2.00319	236.585	0	7.22061	2.20047	10.5482	2.03056	0.957116	0.0548142	3.36384	11.3596	17.2698	2.51256	74.3585	40.1361	81.7738	8.1086	61.0484	0.18697	166.169	9.08747	37.1758	121.765	23.8706	34.7691
Homologous recombination	g__Christensenella	189.061	1.63938	67.3887	0.794757	26.3845	0.136545	0	7.95012	0	56.8602	29.839	142.71	461.315	5.28784	4.23659	22.8039	43.5821	37.9286	183.868	7.14428	0	10.4663	107.784	1418.99	951.043	916.612	57.9469	37.6101	241.275	7.81826	399.693	130.773	28.707	333.055	32.4314	10.5101	118.505	91.9535	18.0988	133.673	56.9373	15.3675	129.021
Homologous recombination	g__Clostridium	1043.49	9.04832	425.803	5.02176	1281.67	1748.65	21.2767	892.996	19.6976	572.055	1775.79	1821.14	1736.86	652.435	1548.04	1641.42	2656.52	663.632	487.607	1848.65	443.667	715.353	216.786	1148.56	2020.02	900.713	345.768	877.155	961.983	427.006	405.244	1172.48	1003.49	1298.08	63.8531	171.343	343.072	551.603	674.053	474.384	924.668	250.94	378.31
Homologous recombination	g__Copranaerobaculum	34.568	0.299746	45.8542	0.540787	80.3434	34.1717	101.406	0.156687	11.969	25.0849	13.2261	23.9416	34.4904	53.0054	1.55234	33.1109	75.2624	66.2929	1.15043	27.5043	0	145.335	67.0896	41.8255	1.07893	12.0395	27.4303	1.48802	14.7547	65.189	12.7013	5.95062	40.1795	19.3082	33.6232	68.1432	21.619	15.8675	5.65886	145.698	105.557	3.66075	12.8612
Homologous recombination	g__Coprobacillus	81.8641	0.70986	72.1856	0.85133	13.6203	0	0	137.303	0	74.8381	445.995	15.1526	24.0443	546.493	0	358.541	0	40.9368	1.09552	366.764	0	12.5746	6.52198	17.4698	2.74319	2.42633	1.20107	7.56968	16.8625	31.0402	3.88152	126.796	69.7487	132.304	4.08815	72.1237	0.123708	200.478	3.5161	53.7981	212.895	37.0076	65.6405
Homologous recombination	g__Desulfovibrio	278.745	2.41706	218.204	2.57341	181.266	2.85563	7.86815	210.609	58.2919	1331.02	102.68	219.817	408.881	21.1329	2.80602	89.9185	199.128	57.6617	1013.34	324.185	2.72473	134.259	366.42	375.863	565.38	309.804	56.4648	349.226	179.831	85.9414	751.506	194.015	389.991	369.47	183.448	242.397	112.366	50.3939	121.98	140.436	48.9473	683.615	380.251
Homologous recombination	g__Erysipelothrix	232.637	2.01724	1.05847	0.0124832	213.216	192.071	492.885	0.692393	18.0273	57.7484	570.311	86.9264	52.3842	680.319	0	75.4483	357.423	173.359	1.63057	2220.72	7.43587	432.285	159.593	94.8049	7.18534	21.7642	92.7255	10.3146	37.4584	612.996	68.5852	14.9468	77.4268	148.434	5.19173	0	0	0	0	2.10416	0	0	2.23034
Homologous recombination	g__Eubacterium	41.2567	0.357746	49.7758	0.587037	55.1906	6.938	0	85.7521	0.364871	45.282	28.1926	33.4726	30.1815	16.2258	1.50743	23.4733	31.1926	25.924	38.3612	48.1923	0.302747	11.6332	7.35404	100.769	23.1871	115.446	6.14158	43.0641	160.706	2.20904	6.2295	51.9496	58.566	179.894	6.89562	3.71317	41.0268	77.8679	13.7939	70.0022	81.5005	95.2824	57.9001
Homologous recombination	g__Hafnia	0	0	224.132	2.64333	0	0	0	0	0	0	0	0	0	0	0	0	0	0	0	0	0	0	0	0	0	0	0	0	0	0	0	0	0	0	0	0	0	0	0	2016.09	0	1.10369	0
Homologous recombination	g__Holdemania	63.3742	0.549531	17.5412	0.206874	19.9993	0	0	14.0139	0	8.13921	498.382	90.536	218.798	1.94108	18.7397	162.283	11.6765	1.76097	3.6056	3.14554	0	40.6165	15.2592	16.1485	123.319	26.4703	1.58303	4.45699	83.5584	123.37	13.8737	119.017	242.843	37.6896	9.63467	10.8839	11.3642	28.8169	1.96867	19.5613	39.6933	17.1528	18.7952
Homologous recombination	g__Hungatella	1.59654	0.0138439	88.9387	1.04891	0.229474	0	0	0.102403	0	0.122099	2.17952	0.574817	0	9.76355	0	0.793921	0	0	0	1.51566	0	0	0	0	0.0528102	0	0	1.0385	0	0	0	0.505401	0	31.0181	9.04956	100.205	58.2678	139.533	106.912	48.372	229.016	42.2493	66.8435
Homologous recombination	g__Hydrogenoanaerobacterium	16.7918	0.145605	148.518	1.75156	24.8286	0	0	30.8894	0	33.4212	14.8284	36.3497	15.423	2.29511	0.49775	11.1212	3.2952	11.1269	36.7768	5.61754	0.616672	1.39059	19.7526	14.4711	26.0955	39.8295	6.48155	27.0741	25.0006	2.84705	20.3179	12.2736	54.3003	26.8317	21.0424	92.1179	364.7	178.391	56.7791	285.691	138.877	51.6307	147.433
Homologous recombination	g__Hyphomicrobium	99.0988	0.859305	1.23692	0.0145878	0.866085	598.41	18.923	1.8941	1121.85	1.64841	11.0452	4.17198	13.0133	20.9075	292.332	26.8304	112.54	13.4489	9.68543	12.1928	584.072	56.6057	3.62099	11.1444	4.76309	8.40202	0.231228	0	9.75433	17.1401	0	8.89037	7.61799	0.95766	0	0	5.70751	0.230285	0.460072	1.12216	0.487677	2.93435	0.190225
Homologous recombination	g__Intestinimonas	22.1699	0.192239	104.68	1.23456	25.4267	0	0	28.0782	0	26.5641	60.248	59.0112	23.0593	3.66698	0.479068	36.2028	3.47173	0.997378	17.1927	17.6533	2.00097	13.3142	10.1464	12.725	44.8117	86.3736	2.61446	29.2131	33.6116	9.37898	28.0123	28.0789	42.3502	20.4127	2.02522	125.773	28.8523	57.1361	215.917	44.7295	93.7786	137.778	236.13
Homologous recombination	g__Kineothrix	41.031	0.355788	326.259	3.84778	42.227	0	0	70.5509	0	15.5276	2.8995	77.3795	10.1972	27.7342	4.26584	16.4471	1.97068	16.5528	180.108	63.2189	5.37577	1.41995	113.858	11.7721	37.7536	75.5082	9.65874	65.9482	82.0377	0	98.3569	50.957	13.8276	135.377	104.285	245.05	25.5429	71.3941	765.081	620.425	191.288	327.54	585.726
Homologous recombination	g__Lachnoclostridium	28.3464	0.245797	207.839	2.45117	30.5955	0.810482	0	42.6831	0.737481	12.6129	16.51	53.6309	32.9025	35.1087	113.045	69.3023	17.1028	8.30589	30.8625	13.1895	26.3743	1.82795	13.5714	24.4149	29.2581	30.9532	6.33535	17.657	53.6893	5.23204	18.1412	70.5646	16.7968	58.1757	49.742	46.1317	249.423	427.583	305.252	173.91	283.743	173.551	161.212
Homologous recombination	g__Mailhella	46.729	0.405196	32.2327	0.38014	26.3619	0	0	54.0241	0	56.3467	16.7521	24.3817	33.5422	1.86956	2.05569	28.8635	29.7825	14.9505	139.075	161.862	1.20813	15.4304	42.9471	144.046	125.497	84.1202	20.9737	58.099	15.7065	0.700996	176.366	18.0133	33.8825	75.011	11.393	22.2165	5.87717	6.87544	3.29645	4.88257	45.0612	23.8215	166.671
Homologous recombination	g__Methanobrevibacter	97.8306	0.848309	153.966	1.81581	42.4908	241.317	0	1.97125	0.908093	111.573	94.1597	55.9071	0.690869	22.4446	0	69.1796	2.75363	329.04	0	54.0102	1205.41	516.613	60.712	20.9169	7.00659	0	38.8825	3.08286	6.45875	8.37266	6.80257	1.33472	7.96471	24.9163	1065.81	194.889	0	0	0	0	13.6326	110.094	1.26655
Homologous recombination	g__Methyloceanibacter	119.81	1.0389	1.64654	0.0194187	1.60461	1324.9	9.04212	2.89649	899.159	0.807004	9.53106	9.56412	14.9345	27.4999	589.019	10.6207	53.6899	13.2189	7.65438	15.3946	500.708	26.6091	2.08133	14.2308	3.96862	9.92958	0.774728	0	14.1412	16.554	1.13589	6.6014	6.60237	1.42673	0.950667	0	7.91733	1.33562	0	0.651578	1.17541	1.58679	1.20145
Homologous recombination	g__Mucinivorans	89.2703	0.774081	28.6703	0.338127	33.3096	0.724588	0	44.4057	0	287.494	123.054	159.661	48.0074	3.37367	11.1364	80.2864	2.73464	20.5703	412.741	91.5234	0	194.117	12.2421	24.3612	25.0116	149.429	6.56818	455.086	59.212	24.4825	201.386	65.3343	89.3297	52.527	0	0	0.788499	1.92681	0.87921	0.148953	1.32645	7.45941	245.504
Homologous recombination	g__Mucispirillum	28.0554	0.243274	143.329	1.69037	10.962	0	0	1.58688	0	62.0923	0.8113	92.0491	0	2.64205	0	20.2568	13.9015	44.2422	0	8.51858	0	32.3032	246.698	0	0	47.4834	6.70166	64.8214	84.4418	34.4607	16.8297	3.78634	36.2607	10.8106	118.968	28.6915	0	7.29441	74.2915	2.81695	3.744	1053.26	0.896633
Homologous recombination	g__Mycobacterium	100.216	0.868995	3.62629	0.0427671	8.77	911.301	140.967	0.996733	792.388	0.264701	22.0584	14.2291	36.0475	39.4484	389.744	25.1964	113.052	7.02588	22.7903	23.9849	227.52	122.032	6.78982	27.4543	4.11671	16.2722	0.162889	0.321336	11.5368	16.9	1.38519	10.9245	11.1377	1.67034	0.383774	0	16.3359	1.27153	0.559402	2.00269	1.28015	7.4016	3.40161
Homologous recombination	g__Mycoplasma	83.5397	0.72439	20.292	0.239316	59.38	13.7162	30.1326	437.394	0	205.509	53.1993	116.586	38.931	86.3392	58.9031	34.4242	6.27428	57.0019	10.3607	206.254	0.279408	89.8231	198.337	26.8825	35.6791	25.5567	276.417	25.2727	27.9811	9.67826	125.122	184.877	10.137	55.7445	2.78028	0.771449	0.0911268	61.3696	25.1614	11.5417	69.0136	1.83556	10.063
Homologous recombination	g__Nocardioides	32.7166	0.283692	75.2623	0.887615	4.74124	59.7763	331.74	15.0081	167.021	0.291755	0	0.264672	1.04359	1.40527	71.2549	0.178913	41.6299	146.978	1.68426	0.778416	123.3	4.88121	0.671238	3.19068	0	0.32689	0.218661	0	2.77323	0.715616	0	0.858737	0.764058	0	3.51083	0.195103	350.121	40.3686	9.04304	35.4874	41.3939	169.216	28.0241
Homologous recombination	g__Paludihabitans	60.7662	0.526916	101.785	1.20042	31.2558	0	0	11.2459	0	39.9824	11.934	95.9284	81.8392	4.11055	8.02083	10.4739	1.94615	23.4299	168.912	6.88342	1.50661	6.40638	39.734	47.3135	194.911	488.509	1.80237	110.993	182.191	2.86287	157.855	36.0618	16.4216	40.4555	0.540243	186.6	7.82363	47.7845	230.235	72.1375	219.543	46.3676	105.037
Homologous recombination	g__Parabacteroides	61.4458	0.532809	41.7509	0.492394	12.9456	0.819267	0	14.7078	0	147.286	23.7113	58.2024	12.8537	0.566039	0.547576	11.5689	0.0582457	13.8729	80.5455	71.5857	1.67767	186.665	38.5865	38.7107	30.1466	34.4361	0.480445	69.948	17.6203	624.802	105.808	64.7171	154.454	26.0496	0.0618063	0.0333455	0	143.001	0.727953	9.36817	1.12737	183.017	38.4221
Homologous recombination	g__Proteocatella	91.3645	0.79224	0	0	87.4125	1.70291	0	8.52635	0.328877	25.5009	77.1629	74.731	35.6349	877.27	51.9472	20.67	16.8284	436.779	0	0.0900019	0	15.4332	35.7026	29.3773	31.3847	1.82463	114.386	4.53405	59.1009	0	3.64879	439.19	285.294	6.47272	0	0	0	0	0	0	0	0	0
Homologous recombination	g__Pseudoflavonifractor	15.432	0.133814	77.4145	0.912997	14.61	0	0	12.259	0	27.176	54.4107	13.0144	13.0537	1.23263	1.19772	47.6388	4.06595	0.185776	31.0069	14.4507	0	4.21208	6.0828	7.0358	20.2013	80.3793	0.0583096	12.5068	26.2268	3.9285	12.9784	8.42019	29.6541	16.9745	1.07431	163.679	23.757	195.19	38.892	17.0523	83.3553	94.5754	79.1557
Homologous recombination	g__Rikenella	91.851	0.796459	4.98709	0.0588159	24.389	1.44237	0	40.2914	0	263.094	130.582	154.314	41.3561	2.96705	5.55883	78.6993	3.13399	37.4326	457.494	76.2718	0	170.718	10.5939	27.9029	32.4527	190.803	6.50361	380.512	56.1856	47.1079	245.708	63.1683	166.862	39.9873	0	0	0	2.89691	0	0	1.48144	4.26402	36.2414
Homologous recombination	g__Ruminococcus	52.0483	0.451321	48.5446	0.572516	47.7578	22.0382	0	21.4089	0	56.6011	35.005	80.9078	87.336	5.59001	6.91323	67.1625	80.7477	37.9978	36.0994	32.6302	7.65591	8.66441	18.2806	65.7025	97.2818	77.9371	8.62081	31.0349	167.321	8.86745	53.5557	90.2811	137.038	171.011	14.2262	61.5178	39.8981	28.2462	106.237	25.9345	38.0616	69.9131	52.8671
Homologous recombination	g__Ruthenibacterium	146.6	1.2712	219.76	2.59177	67.9604	17.2255	0	51.3635	0	53.7056	37.5592	163.302	221.902	108.572	43.8731	281.52	140.783	242.405	979.453	110.172	12.3107	45.8668	65.1622	223.743	176.102	503.513	48.0037	40.6925	117.361	10.7525	120.905	157.377	125.671	230.754	22.6202	133.835	388.867	183.845	117.407	131.789	389.626	236.86	372.993
Homologous recombination	g__Thomasclavelia	89.4701	0.775813	176.975	2.08718	216.586	8.24286	495.017	0.241894	6.54217	57.8532	36.1268	94.7145	49.9002	176.491	5.17949	59.2164	232.593	128.812	2.56119	81.6335	0	314.784	215.007	80.5222	3.91199	29.5578	71.1894	8.12806	45.0496	170.604	46.2361	5.27918	31.4319	10.6906	8.06293	293.549	677.73	134.397	44.8627	55.8857	238.884	136.865	2.53839
Homologous recombination	g__Vibrio	159.127	1.37982	0	0	582.054	106.459	0	102.318	1019.19	16.6567	139.583	322.403	3.0995	2.84679	1.07646	962.229	4.01366	301.472	7.41352	119.428	1.50073	40.8147	0.294536	1.17662	0	0	47.0852	1.36977	11.1536	764.679	2.21632	142.822	48.5316	21.9106	0	0	0	0	0	0	0	0	0
Homologous recombination	g__unclassified_c__Caudoviricetes	1154.22	10.0085	81.3766	0.959724	161.816	1652.53	46.165	86.6071	74.7682	439.724	3229.14	364.903	124.352	2395.13	54.4201	319.994	674.286	826.695	75.3163	10011.1	7232.87	2413.56	202.041	376.412	124.382	89.2126	286.46	169.279	146.012	2014.9	229.33	75.9517	79.5032	649.757	32.2034	42.7167	76.0971	59.9026	114.03	169.171	91.283	66.9515	80.0339
Homologous recombination	g__unclassified_f__Erysipelotrichaceae	155.432	1.34778	203.852	2.40415	366.717	16.3138	888.634	0.516856	19.2378	88.9192	53.0438	144.208	91.4518	382.578	20.1268	91.1885	396.941	311.859	3.12493	135.877	0	487.333	319.256	149.413	3.51014	35.8284	150.559	7.91834	65.304	267.847	76.0655	19.6763	49.8687	19.6293	105.772	639.236	109.199	255.904	18.9994	138.959	168.432	324.187	73.9812
Homologous recombination	g__unclassified_p__Bacillota	78.6329	0.681841	1302.71	15.3637	0	0	0	0	0	0	0	0	0	0	0	0	0	0	0	0	0	0	2358.99	0	0	0	0	0	0	0	0	0	0	0	9463.97	1049.16	0	0	0	0	135.689	895.496	180.091
Linoleic acid metabolism	g__Acidovorax	0.367176	0.777648	0	0	0	0	0	0	0	0	0	0	0	0	11.0153	0	0	0	0	0	0	0	0	0	0	0	0	0	0	0	0	0	0	0	0	0	0	0	0	0	0	0	0
Linoleic acid metabolism	g__Acinetobacter	0.152193	0.322331	0	0	0	0	0	0	0	0	0	0	0	0	0	0	0	0.447405	0	0	0	2.77456	0	0	0	0	0	0	0	1.34382	0	0	0	0	0	0	0	0	0	0	0	0	0
Linoleic acid metabolism	g__Acytostelium	0.388991	0.823851	0	0	0	0	0	0	0	0	0	0	0	0	11.3199	0	0	0	0	0	0	0	0	0.349866	0	0	0	0	0	0	0	0	0	0	0	0	0	0	0	0	0	0	0
Linoleic acid metabolism	g__Aestuariibaculum	0.438887	0.929527	0	0	0	0	0	0	0	0	0	0	0	0	0	0	0	0	0	0	0	13.1666	0	0	0	0	0	0	0	0	0	0	0	0	0	0	0	0	0	0	0	0	0
Linoleic acid metabolism	g__Blakeslea	0.655243	1.38775	0	0	0	0	0	0	0	0	0	0	0	0	18.9861	0	0	0	0	0	0	0	0.671238	0	0	0	0	0	0	0	0	0	0	0	0	0	0	0	0	0	0	0	0
Linoleic acid metabolism	g__Blastopirellula	0.777148	1.64594	0	0	0	0	0	0	2.67438	0	0	0	0	0	0	0	0	0	0	0	20.6401	0	0	0	0	0	0	0	0	0	0	0	0	0	0	0	0	0	0	0	0	0	0
Linoleic acid metabolism	g__Bracoviriform	0.425506	0.901187	0.169819	2.35605	0	0	0	0	0	0	0	0	0	0	12.6136	0	0	0	0	0	0	0	0	0.151609	0	0	0	0	0	0	0	0	0	0	0	0	0	1.52838	0	0	0	0	0
Linoleic acid metabolism	g__Candidatus_Desulfatibia	0.210302	0.445401	0	0	0	0	0	0	0	0	0	0	0.302699	0	0	0	0	0	0	0	0	6.00635	0	0	0	0	0	0	0	0	0	0	0	0	0	0	0	0	0	0	0	0	0
Linoleic acid metabolism	g__Candidatus_Korobacter	0	0	0.169172	2.34707	0	0	0	0	0	0	0	0	0	0	0	0	0	0	0	0	0	0	0	0	0	0	0	0	0	0	0	0	0	0	0	0	0	0	0	0	1.52255	0	0
Linoleic acid metabolism	g__Candidatus_Scalindua	0.47608	1.0083	0	0	0	0	0	0	14.1494	0	0	0	0	0.133061	0	0	0	0	0	0	0	0	0	0	0	0	0	0	0	0	0	0	0	0	0	0	0	0	0	0	0	0	0
Linoleic acid metabolism	g__Chroococcidiopsis	0	0	0.299299	4.15242	0	0	0	0	0	0	0	0	0	0	0	0	0	0	0	0	0	0	0	0	0	0	0	0	0	0	0	0	0	0	0	0	0	0	0	0	0	2.69369	0
Linoleic acid metabolism	g__Circinella	0.339452	0.718932	0	0	0	0	0	0	0	0	0	0	0	0	9.27177	0	0	0	0	0	0	0	0	0.911797	0	0	0	0	0	0	0	0	0	0	0	0	0	0	0	0	0	0	0
Linoleic acid metabolism	g__Citrobacter	0	0	0.293503	4.07202	0	0	0	0	0	0	0	0	0	0	0	0	0	0	0	0	0	0	0	0	0	0	0	0	0	0	0	0	0	0	0	0	0	0	0.256227	2.3853	0	0	0
Linoleic acid metabolism	g__Clostridium	6.17505	13.0782	0	0	10.0436	19.4223	0	0.218124	0	2.24206	2.17107	4.65458	10.847	0.789192	0	27.3783	50.9364	0.474205	3.65793	1.30818	0	0	0	4.66845	18.8907	1.0894	0.693684	3.24115	6.32237	0	0	1.68181	10.4774	4.04355	0	0	0	0	0	0	0	0	0
Linoleic acid metabolism	g__Craterilacuibacter	0	0	0.228864	3.17523	0	0	0	0	0	0	0	0	0	0	0	0	0	0	0	0	0	0	0	0	0	0	0	0	0	0	0	0	0	0	0	0	0	0	0	0	0	0	2.05978
Linoleic acid metabolism	g__Crenobacter	0	0	0.227847	3.16112	0	0	0	0	0	0	0	0	0	0	0	0	0	0	0	0	0	0	0	0	0	0	0	0	0	0	0	0	0	0	0	0	0	0	0	0	0	0	2.05062
Linoleic acid metabolism	g__Cylindrospermum	0	0	0.563137	7.81288	0	0	0	0	0	0	0	0	0	0	0	0	0	0	0	0	0	0	0	0	0	0	0	0	0	0	0	0	0	0	0	0	5.06823	0	0	0	0	0	0
Linoleic acid metabolism	g__Desulfopila	0.321916	0.681792	0	0	0	0	0	0	9.65749	0	0	0	0	0	0	0	0	0	0	0	0	0	0	0	0	0	0	0	0	0	0	0	0	0	0	0	0	0	0	0	0	0	0
Linoleic acid metabolism	g__Desulfovibrio	0.980488	2.07659	0	0	1.20372	0	0	4.96872	0	1.81469	0	1.12085	0	0	0	1.02891	0	0.460142	0	0.23125	0	0	0.7644	3.5771	1.11259	1.57279	1.14544	0.143355	0.469465	0	8.72506	0.520328	0.555822	0	0	0	0	0	0	0	0	0	0
Linoleic acid metabolism	g__Drosophila	0.313658	0.664302	0.0449531	0.623672	0	0	0	0	0	0	0	0	0	0	9.22824	0	0	0	0	0	0	0	0	0.181503	0	0	0	0	0	0	0	0	0	0	0	0	0	0	0	0	0.404578	0	0
Linoleic acid metabolism	g__Elizabethkingia	0.146433	0.310134	0	0	0.477746	0	0	0	0	0	0	0	0	0	0	0	0	0	0	0	0	0	0	0	0	0	0	0	0	3.47405	0	0	0.441203	0	0	0	0	0	0	0	0	0	0
Linoleic acid metabolism	g__Elsinoe	0.300245	0.635894	0	0	0	0	0	0	0	0	0	0	0	0	8.77017	0	0	0	0	0	0	0	0	0.237179	0	0	0	0	0	0	0	0	0	0	0	0	0	0	0	0	0	0	0
Linoleic acid metabolism	g__Fusarium	0.484255	1.02561	0	0	0	0	0	0	0	0	0	0	0	0	12.6001	0	0	0	0	0	0	0	0.68845	1.23911	0	0	0	0	0	0	0	0	0	0	0	0	0	0	0	0	0	0	0
Linoleic acid metabolism	g__Heterostelium	0.330912	0.700843	0	0	0	0	0	0	0	0	0	0	0	0	9.92735	0	0	0	0	0	0	0	0	0	0	0	0	0	0	0	0	0	0	0	0	0	0	0	0	0	0	0	0
Linoleic acid metabolism	g__Klebsiella	0.734707	1.55605	0.16887	2.34287	0	0	0	0	0	0	0	0	1.96439	0	19.4692	0	0	0	0	0	0	0	0.353283	0.254343	0	0	0	0	0	0	0	0	0	0	0	0	0	0	0	1.51983	0	0	0
Linoleic acid metabolism	g__Mesobacillus	0.251296	0.532224	0	0	0	0	0	0	0	0	0	0.416614	0	0	0	3.01171	0.341654	0	0.245437	0	0	0	0	0	0	0.511522	0	0.37299	1.42506	0	0	0.676909	0.241028	0.295963	0	0	0	0	0	0	0	0	0
Linoleic acid metabolism	g__Methylobacterium	0.607141	1.28587	0	0	0	0	0	0	0	0	0	0	0	0	17.3151	0	0	0	0	0	0	0	0	0.899074	0	0	0	0	0	0	0	0	0	0	0	0	0	0	0	0	0	0	0
Linoleic acid metabolism	g__Microbulbifer	0.850346	1.80096	0	0	0	22.1795	0	0	0	0	0	0	0	0	0	0.196416	0	0	0	0.17658	0	2.78419	0	0	0	0	0	0	0	0	0	0	0	0.173718	0	0	0	0	0	0	0	0	0
Linoleic acid metabolism	g__Mycobacterium	1.83332	3.88283	0	0	0	19.8695	0	0	13.1252	0	0	0	0.588857	0.213229	8.64254	0.394978	0.806528	0	0	0.433377	5.41134	4.98042	0.293438	0	0	0	0	0	0.240291	0	0	0	0	0	0	0	0	0	0	0	0	0	0
Linoleic acid metabolism	g__Neocucurbitaria	0.0984696	0.20855	0.2365	3.28117	0	2.95409	0	0	0	0	0	0	0	0	0	0	0	0	0	0	0	0	0	0	0	0	0	0	0	0	0	0	0	0	0	0	0	0.438428	0	0	0	0	1.69007
Linoleic acid metabolism	g__Oceanobacillus	0.480466	1.01759	0	0	0	0	0	0	0	0	0	0	0	0	13.5806	0	0	0	0	0	0	0	0.214796	0.618563	0	0	0	0	0	0	0	0	0	0	0	0	0	0	0	0	0	0	0
Linoleic acid metabolism	g__Odoribacter	0.452605	0.958579	0	0	0	0	0	0	0	0.847937	0	2.06688	0	0.121307	0	0.127705	0	0	0.561991	0	0	0	1.1385	0	1.79517	0.39042	0	1.13874	2.48612	0	1.99925	0.904139	0	0	0	0	0	0	0	0	0	0	0
Linoleic acid metabolism	g__Paeniclostridium	1.87829	3.97807	0	0	2.50551	2.27574	0	5.86996	0	1.11095	16.7896	0.999873	5.18849	0	0	2.67708	8.74635	0	0.3927	0.240672	0	0	0	0	2.02635	0	0	3.28231	0	0	0	2.43687	0.385644	1.42062	0	0	0	0	0	0	0	0	0
Linoleic acid metabolism	g__Parabacteroides	0.292831	0.620191	2.0998	29.1324	0	0	0	0	0	0.523182	0	1.56957	0	0	0	0	0	0	0	0	0	0	0.624408	0	0.227207	1.28475	0	1.63942	0	0	0	2.12518	0.605372	0.185837	0	0.145453	0	8.82513	0	0.550966	0	7.95919	1.41748
Linoleic acid metabolism	g__Phaeodactylibacter	0	0	0.129955	1.80298	0	0	0	0	0	0	0	0	0	0	0	0	0	0	0	0	0	0	0	0	0	0	0	0	0	0	0	0	0	0	0	0	0	0	0	0	1.1696	0	0
Linoleic acid metabolism	g__Photobacterium	5.77218	12.225	0	0	73.1969	2.12732	0	1.41742	0	8.62434	1.551	11.0912	0.179005	0	0	25.4948	0.444562	1.33694	0.484352	1.96268	0	4.1581	0	0	0	0	3.81376	0	0.600764	0	0	7.73641	27.9723	0.97362	0	0	0	0	0	0	0	0	0
Linoleic acid metabolism	g__Plesiomonas	4.53217	9.59876	0	0	0	0	0	0	0	0	0	0	12.109	0	1.10304	0	0	0	12.6437	0	0	0	0.293438	3.03117	5.06018	1.7459	0	82.8124	1.54387	0	14.9419	0	0.680419	0	0	0	0	0	0	0	0	0	0
Linoleic acid metabolism	g__Prevotella	0.0119402	0.0252883	0.139463	1.93489	0	0	0	0	0	0	0	0	0	0	0	0	0	0	0.358206	0	0	0	0	0	0	0	0	0	0	0	0	0	0	0	0	0	0	0	1.25517	0	0	0	0
Linoleic acid metabolism	g__Proteiniphilum	0.358504	0.759282	0	0	0	0	0	0	0	0.648557	0	0.972849	0	0	0	0	0	0	0	0.526876	0	2.88954	0.290265	0.208974	0.211241	1.79171	0	0.870981	0	0	0.679623	1.38309	0.281416	0	0	0	0	0	0	0	0	0	0
Linoleic acid metabolism	g__Providencia	0.166823	0.353317	0	0	0	0	0	0	0	0	0	0	0	0	0	0	0	0	0	0	0	0	0	0	0	0	0	0	0	5.00468	0	0	0	0	0	0	0	0	0	0	0	0	0
Linoleic acid metabolism	g__Rhodoflexus	5.99117	12.6888	0	0	22.1427	0	4.54615	0	0	1.46476	0.0802052	1.05082	21.1632	0	0	0	0	0.823567	0	0.137965	0	4.53983	22.3461	6.56649	18.9175	14.075	0	0	13.444	5.86346	41.9101	0	0.66321	0	0	0	0	0	0	0	0	0	0
Linoleic acid metabolism	g__Rhodoplanes	0.157063	0.332647	0	0	0	0	0	0	0	0	0.507069	0	0	0	0	0.242554	3.96227	0	0	0	0	0	0	0	0	0	0	0	0	0	0	0	0	0	0	0	0	0	0	0	0	0	0
Linoleic acid metabolism	g__Scandinavium	0	0	1.05469	14.6326	0	0	0	0	0	0	0	0	0	0	0	0	0	0	0	0	0	0	0	0	0	0	0	0	0	0	0	0	0	0	0	0.139936	0	0	9.35228	0	0	0	0
Linoleic acid metabolism	g__Shewanella	0.236827	0.501579	0	0	0	0	0	0	0	0	0	0	0	0	0	1.65281	0	0	0	0	0	0	0	0	0	0	0	0.271265	0	4.92023	0	0.260492	0	0	0	0	0	0	0	0	0	0	0
Linoleic acid metabolism	g__Tannerella	0.323068	0.684232	0	0	0	0	0	0.255834	0	2.14987	0.128056	0.457569	0	0	0	0	0	0.220648	0.17971	0.55069	0	0	0	0	0	0	0	0.136552	0.596246	0	3.83584	0	0.529444	0.651595	0	0	0	0	0	0	0	0	0
Linoleic acid metabolism	g__Trichoderma	0.635005	1.34489	0	0	0	0	0	0	0	0	0	0	0	0	18.5435	0	0	0	0	0	0	0	0.506595	0	0	0	0	0	0	0	0	0	0	0	0	0	0	0	0	0	0	0	0
Linoleic acid metabolism	g__Vibrio	6.70667	14.2042	0	0	26.5288	3.61289	0	5.91433	12.9739	1.6792	7.34298	17.888	0	0.335865	11.1683	40.9219	0	10.7099	1.19189	8.02692	0	3.117	0	0.241626	0	0	0.828977	0	0.384605	35.3965	0.18328	8.17799	2.30736	2.26786	0	0	0	0	0	0	0	0	0
Linoleic acid metabolism	g__unclassified_f__Nitrososphaeraceae	0.492456	1.04298	1.12753	15.6432	0	0.925377	0	0	4.39823	0	0	0	0	0	0	0	0	0	0	0	9.25751	0	0	0	0	0	0	0	0	0	0	0	0	0.192554	0.437857	0	4.35213	0.549356	0.671438	0.231505	2.06676	1.57402	0.264711
Linoleic acid metabolism	g__unclassified_f__Xylariaceae	0.489644	1.03703	0	0	0	0	0	0	0	0	0	0	0	0	14.1903	0	0	0	0	0	0	0	0.157938	0.341119	0	0	0	0	0	0	0	0	0	0	0	0	0	0	0	0	0	0	0
Linoleic acid metabolism	g__unclassified_p__Candidatus_Rifleibacteriota	0	0	0.184646	2.56175	0	0	0	0	0	0	0	0	0	0	0	0	0	0	0	0	0	0	0	0	0	0	0	0	0	0	0	0	0	0	0	0	0	0	0	0	0	1.66181	0
Mismatch repair	g__Akkermansia	16.2166	0.169534	68.9605	0.840197	0	0	0	0	0	0.0259929	0	2.4528	18.8938	0.0415616	0	0	0	0	3.44415	1.07301	0	4.35053	0.345795	0.0582232	41.7095	0.340588	0.0510579	60.3051	352.209	0	1.15134	0	0	0.0467995	0.111822	0.435325	157.199	23.456	0.545945	0.328329	20.4202	0	418.148
Mismatch repair	g__Alistipes	110.732	1.15762	3.4419	0.0419352	34.6338	2.42194	0	76.8263	0	474.277	97.3615	170.273	38.9494	1.43061	8.42965	73.5291	1.90501	33.276	183.813	137.164	0.689743	278.17	18.6549	114.924	28.889	260.544	8.47144	451.899	67.4982	66.5307	218.187	104.414	274.1	94.6823	0	1.64779	0	2.48782	7.5477	0.173108	0.772841	3.05863	15.2892
Mismatch repair	g__Amedibacterium	9.6627	0.101017	108.457	1.32141	4.42947	18.9554	0	0.11115	0	0.821802	5.50495	1.9723	18.8123	26.8643	1.60984	35.1422	0	65.2716	0.641514	4.49225	0	0	1.67462	17.9765	4.76758	1.37671	6.06261	2.59057	3.17684	3.61024	0.647003	10.0796	37.0853	16.2044	46.0254	362.81	75.9959	189.333	7.20129	99.558	98.2388	55.9215	41.0273
Mismatch repair	g__Anaerorhabdus	320.934	3.35515	348.107	4.24125	95.5296	7.34807	0	1071.76	0	131.074	1686.33	263.743	544.652	953.983	562.948	699.376	80.5343	119.162	20.6207	17.4262	3.14461	110.898	48.1302	76.648	307.186	68.9144	79.9188	69.8943	283.316	482.897	31.8659	856.39	820.788	133.543	34.8253	159.455	1173.51	681.467	4.51067	291.656	663.32	70.8134	53.4048
Mismatch repair	g__Anaerotignum	66.8052	0.698404	78.7372	0.959314	74.3816	1.05214	0	156.687	0	38.6201	28.6705	236.348	34.3592	40.489	41.0572	119.184	7.97153	78.5694	78.2993	5.73531	8.53162	14.9301	42.6319	23.7479	41.915	96.1067	77.469	80.9425	43.5719	13.8697	41.3206	82.2075	114.938	380.549	30.6385	58.4927	39.0996	50.1611	171.023	131.282	73.9483	59.1606	94.8295
Mismatch repair	g__Anaerotruncus	110.755	1.15787	148.014	1.80337	62.2541	10.9742	0	132.675	15.1057	121.052	54.4005	173.327	50.6026	10.8233	12.263	116.016	38.3454	86.8683	296.498	19.4813	0	12.0542	477.112	99.4902	207.812	250.898	24.3807	131.062	66.5665	6.21226	303.563	82.6126	161.024	299.18	29.1937	176.374	63.6042	66.8468	198.855	226.628	259.507	197.662	113.458
Mismatch repair	g__Angelakisella	35.844	0.374725	112.833	1.37473	42.6998	3.11418	0	17.2444	0	46.8738	25.0949	130.492	11.3453	16.7767	7.29483	16.1057	9.45531	44.521	115.576	2.45376	0	17.6911	54.6317	17.6734	21.4317	71.9808	1.57002	86.9901	9.12917	7.59847	87.2534	59.7838	99.0652	51.4748	10.6364	200.587	4.17967	109.377	184.029	59.6026	281.292	129.398	36.3971
Mismatch repair	g__Bacteroides	180.85	1.89067	69.9199	0.851886	53.1945	5.85017	0	549.828	0	405.375	471.53	222.484	25.4948	7.63976	822.771	35.2885	0.94003	27.6017	114.442	624.059	4.12739	210.792	15.0409	30.5727	32.7471	103.444	8.93369	571.881	68.2261	108.702	78.7023	375.014	61.6439	389.173	0.135101	13.0615	5.08764	140.997	14.6463	30.9385	18.0939	231.53	174.789
Mismatch repair	g__Bilophila	190.652	1.99314	191.659	2.33512	103.506	14.8657	0	211.192	1.05203	272.839	71.774	162.576	849.159	4.33589	0.729265	79.0124	89.297	18.6131	585.334	329.851	7.23729	104.369	123.116	258.626	352.299	565.554	27.7404	248.631	125.245	59.4223	427.127	108.224	349.62	168.207	64.8636	187.006	286.289	133.631	233.544	237.719	135.693	121.597	324.586
Mismatch repair	g__Breznakia	753.628	7.87868	17.0268	0.20745	1683.69	44.7903	3857.59	2.26016	63.8535	403.592	310.55	671.242	375.781	1784.64	8.97972	665.797	1824.22	1749.78	2.47591	584.366	0.907669	2597.18	1525.07	525.251	8.98197	163.356	705.761	30.453	292.043	1318.9	367.265	110.054	705.961	224.067	46.9628	0	57.279	0	0	1.10325	21.3457	0.0972052	26.4533
Mismatch repair	g__Caloramator	3.79809	0.0397065	86.337	1.05191	5.8001	0	0	3.60979	0	5.05871	11.2992	16.6423	3.23098	2.6179	2.70746	6.21215	4.17426	4.38603	2.42926	1.2194	0	0.629641	0.406811	0.436043	0.72358	0.837037	1.97097	2.69992	9.03893	2.83317	0.317501	9.54891	6.47546	8.6371	589.735	99.5943	0.228047	0	1.62544	6.38211	6.62062	69.676	3.17085
Mismatch repair	g__Candidatus_Avidesulfovibrio	65.1714	0.681324	53.4149	0.650794	35.6147	0.317381	0	100.769	0.587848	63.489	28.7809	41.9854	326.708	0.851879	0	30.1259	24.6937	3.19667	175.296	109.767	0.417141	21.9827	4.48522	134.815	153.765	204.55	5.86918	39.9074	63.1276	19.9291	149.494	39.8335	106.861	67.9226	6.33592	73.8162	135.315	68.0207	14.8049	6.13781	65.555	5.28981	105.459
Mismatch repair	g__Candidatus_Pelethosoma	68.4007	0.715084	7.64729	0.0931727	107.816	0	0	747.183	0.419601	194.849	25.6056	112.258	59.9264	22.0332	0.477787	24.7347	2.59512	28.777	4.75979	149.566	0.662391	18.041	0	9.44514	43.7572	16.9668	70.8635	26.8954	29.8616	0.644484	4.84756	228.196	1.49431	119.344	0	0	0	39.6954	0	0.554602	10.0078	0	18.5678
Mismatch repair	g__Candidatus_Stoquefichus	42.9493	0.449006	46.7761	0.569909	7.69007	0	0	84.1032	0	41.2383	195.752	9.34558	12.2683	298.647	0	182.755	0	29.9659	2.12762	203.652	0	2.27146	1.83366	8.92597	0.451979	0.450746	0	2.71997	12.3747	12.1528	1.4324	70.2371	39.9317	68.1516	2.24708	107.018	33.771	120.267	6.31836	28.0775	87.2869	13.6729	22.3265
Mismatch repair	g__Christensenella	127.218	1.32998	56.6918	0.690718	15.1938	0.136545	0	3.46862	0	38.29	15.4123	99.4962	301.119	3.10314	1.46648	12.1665	31.2445	28.184	133.96	4.72449	0	9.17951	66.262	924.336	652.054	632.515	41.8761	23.276	166.55	3.95936	263.542	87.2304	16.1072	241.675	19.8171	1.61598	104.666	86.6741	9.26521	118.17	42.9664	15.8171	111.234
Mismatch repair	g__Clostridium	1011.49	10.5744	447.743	5.45519	1351.91	1666.31	14.2459	1053.19	17.0596	577.982	1537.28	1711.13	1649.55	741.779	1529.91	1546.27	2833.16	606.73	458.135	1839.12	317.944	767.399	228.162	1067.91	1888.01	773.128	327.575	919.718	834.937	392.121	411.804	1112.88	968.547	1200.67	321.773	287.952	324.931	511.68	647.914	458.241	821.241	269.818	386.139
Mismatch repair	g__Coprobacillus	69.8533	0.73027	66.4119	0.809146	12.0821	0	0	123.197	0	66.9972	351.23	16.0301	19.3384	464.021	0	340.517	0	41.7815	0.930944	293.713	0	17.9097	7.79343	15.1683	3.22784	1.53873	0.808349	6.18128	13.0214	26.4202	5.52625	99.8183	63.0659	105.282	10.7577	68.9138	2.35212	200.653	4.16481	45.9994	176.953	32.5565	55.3565
Mismatch repair	g__Cucumispora	78.4264	0.819895	0	0	0	0	0	0	0	0	0	0	4.40545	0	5.22539	0	0.222281	0	0	0	0	0	8.44672	0	0	0	1441.97	0	892.52	0	0	0	0	0	0	0	0	0	0	0	0	0	0
Mismatch repair	g__Desulfovibrio	220.265	2.30273	190.165	2.31692	134.341	2.01276	0	173.505	0	1136.07	86.5955	164.192	216.447	22.2777	5.54672	54.3644	170.9	60.4143	907.951	263.469	5.92132	87.3351	326.663	297.857	394.745	135.624	54.0624	360.63	132.877	27.8003	529.685	174.386	321.271	361.016	147.062	195.091	56.2312	14.024	102.119	166.884	47.2676	577.572	405.235
Mismatch repair	g__Erysipelothrix	233.369	2.43972	11.862	0.144523	212.852	192.071	492.885	1.05758	18.0273	53.895	569.527	83.6158	51.0422	680.013	36.3149	75.3401	356.395	172.4	1.63057	2220.43	7.43587	428.291	159.337	96.5208	6.99657	20.9115	93.5042	13.3001	44.8232	612.053	67.2452	12.8552	71.3796	148.941	5.30896	3.47774	31.1704	15.444	0	14.7604	29.1074	0.345958	7.14304
Mismatch repair	g__Eubacterium	34.9731	0.36562	53.0245	0.646037	39.3399	30.1196	0	56.4416	1.4544	38.9016	19.8239	44.1331	28.6434	34.4936	1.60729	46.0124	3.15195	23.6525	44.2877	59.3084	1.60287	20.4893	20.7233	68.3736	25.5111	83.7865	7.52069	40.6296	95.1091	2.91377	18.7894	28.6869	29.8704	133.815	10.8202	21.5266	39.4745	100.063	24.8917	90.6599	72.4796	89.0556	28.2495
Mismatch repair	g__Faecalicatena	54.2392	0.567035	75.0504	0.914395	41.5624	1.2523	0	39.3366	0	37.2022	41.7484	151.509	27.3011	30.0338	40.452	73.2792	32.2358	56.1477	77.0758	8.28308	7.77687	13.0131	54.6598	92.801	81.2528	62.9276	15.2599	42.3732	36.3246	11.6861	67.1307	201.78	87.66	195.111	14.043	46.8133	83.3133	86.687	174.986	95.6511	54.9225	72.5762	46.4606
Mismatch repair	g__Hafnia	0	0	224.155	2.73105	0	0	0	0	0	0	0	0	0	0	0	0	0	0	0	0	0	0	0	0	0	0	0	0	0	0	0	0	0	0	0	0	0	0	0	2016.29	0	1.10369	0
Mismatch repair	g__Hungatella	2.38217	0.024904	115.149	1.40295	1.91054	0	0	0.765339	0	0	4.43878	7.95676	0.307642	11.2439	0	2.07028	0.768722	1.45166	7.49073	0.457615	0	0	4.19129	1.9319	1.87878	3.22391	1.27007	2.75259	0.356058	0	3.96975	10.6334	0.263472	2.13183	12.6263	33.2005	97.3342	213.62	184.958	86.6108	276.318	45.2632	86.41
Mismatch repair	g__Hydrogenoanaerobacterium	34.3767	0.359385	127.282	1.55077	33.9684	5.92891	0	40.457	0	42.8541	21.3014	66.8055	19.2725	17.6149	1.95148	42.3498	27.2455	36.4732	127.15	23.4125	1.96469	7.60687	37.9809	33.8045	38.7686	60.7531	12.1421	47.4498	25.4512	7.98507	41.0249	47.5134	81.5758	80.4936	19.089	79.2318	243.888	141.079	136.162	189.547	146.135	73.5746	116.829
Mismatch repair	g__Hyphomicrobium	81.5054	0.852085	1.10875	0.0135087	1.07528	525.529	17.324	1.05613	889.75	1.87415	10.9304	5.0305	9.24351	18.9054	246.506	22.4759	89.0168	18.1369	6.42167	10.7941	485.452	31.9185	3.20513	8.34241	1.189	6.29949	0.2286	0.227587	6.89029	12.8369	0.690826	6.22656	6.79158	0.792608	0	0	6.57225	0.700353	0.196576	0.582271	0.229333	1.69794	0
Mismatch repair	g__Intestinimonas	21.2143	0.221782	108.388	1.32057	23.5429	0	0	18.1853	0	26.1372	52.6753	60.7787	25.315	4.25693	1.29876	40.3158	3.18936	1.58238	19.6888	17.9533	0	8.05512	12.3111	13.9999	42.2851	91.3645	2.44715	25.9424	28.1142	7.23922	27.6597	28.3191	34.4251	19.3477	2.51468	145.254	22.6098	60.673	199.337	47.0189	95.7944	161.369	240.922
Mismatch repair	g__Kineothrix	41.7517	0.436486	324.441	3.95291	51.1891	0	0	77.7153	0	16.0041	2.93176	70.5038	9.15781	28.3067	3.27707	14.8682	2.32294	16.576	157.677	74.8361	5.74315	8.78004	116.909	14.5065	34.2722	86.0371	7.60728	68.3941	81.6848	0	95.947	57.8157	11.468	138.018	108.422	249.813	28.1791	67.882	791.114	620.364	174.964	295.983	583.25
Mismatch repair	g__Lachnoclostridium	27.6966	0.289549	176.832	2.15448	24.6825	1.15813	0	37.6635	0.737481	10.1487	19.907	49.4513	32.3083	32.7078	107.408	69.4389	12.2198	8.55518	20.7373	14.4544	15.2549	0	15.0879	21.3135	26.6116	21.997	6.70405	18.9124	61.9666	5.5583	18.724	65.2183	13.8867	98.0833	32.0265	47.5958	210.058	311.897	230.957	161.989	279.23	150.506	167.233
Mismatch repair	g__Longicatena	10.9902	0.114896	71.1598	0.866993	3.87996	0	0	0.46314	0	2.27392	8.98923	6.54146	7.8188	21.7246	0.96585	49.0987	2.20918	55.9901	4.96825	3.72714	0.853748	1.65557	0.696996	17.3219	6.57484	5.80102	4.75256	1.46055	7.1228	4.09526	1.4409	16.2497	64.8125	28.2185	30.9577	256.04	42.9132	82.0468	4.88453	42.7665	62.8712	86.7113	31.2467
Mismatch repair	g__Mailhella	38.908	0.406757	37.7446	0.459871	20.9819	1.17561	0	36.9105	0	53.7722	11.9429	26.9828	32.3978	0.958898	0.250269	25.551	22.6345	13.7569	121.668	137.487	1.20813	12.6867	36.1231	108.315	105.181	68.0437	17.3794	45.4242	13.0441	0.724808	140.353	15.4037	29.7947	67.0882	17.2985	24.348	5.88711	5.2491	5.30655	9.72647	66.8759	29.5913	175.419
Mismatch repair	g__Methanobrevibacter	111.122	1.16171	322.983	3.93514	45.8196	241.317	0	2.07907	0.908093	111.641	94.5915	58.8799	0.690869	22.6776	0	64.557	3.08756	330.14	0	56.436	1205.99	516.613	449.369	21.6901	6.27023	0.315682	41.2918	2.15186	6.45875	8.37266	7.34142	3.01757	7.96471	23.9888	2211.63	395.625	0	0	1.62713	12.4413	44.8834	225.467	15.1699
Mismatch repair	g__Methanosphaera	101.55	1.06164	0.340635	0.00415021	49.1991	291.864	0	1.3722	15.4871	112.521	94.0982	56.0383	0	25.9034	0	69.2119	2.68354	319.136	0.317452	61.4299	1351.64	408.213	64.4389	25.6563	3.55269	0	44.9885	0.366208	1.99878	7.45342	8.00102	1.35624	6.62607	22.956	0	0	0	0	0	0	0	0	3.06572
Mismatch repair	g__Methyloceanibacter	113.208	1.18351	1.4226	0.0173326	2.9027	1182.43	11.2576	3.01029	882.574	0.281279	7.85252	7.67583	15.0682	22.6368	569.481	14.9895	48.5313	10.6522	5.90035	16.776	477.425	38.141	1.33279	12.5473	3.13485	9.44095	0.2032	0.227587	14.2186	17.8663	0.966795	8.20163	8.89546	1.61694	0	0	10.6663	1.0047	0	0.228749	0	0.683888	0.21971
Mismatch repair	g__Mucinivorans	59.043	0.617256	18.319	0.223194	20.6767	0.724588	0	32.6691	0	203.154	76.171	106.33	35.2554	1.75403	6.39898	53.7063	2.04645	10.7753	271.356	64.1236	0	148.643	5.64795	13.9932	11.2602	90.4799	5.11012	318.18	30.7568	16.8163	111.955	36.9495	52.8344	43.5244	0	0	0	3.72904	0.714683	0.148953	1.36233	1.25812	157.658
Mismatch repair	g__Mucispirillum	19.0964	0.19964	113.173	1.37887	5.80766	0	0	1.06715	0	36.2562	2.09733	44.5483	0	1.59662	0	10.4695	11.7575	37.2658	0	11.4573	1.27214	13.8935	179.569	0	0.892228	54.2074	6.47788	32.0777	42.6012	20.7199	15.3593	3.3221	28.1115	12.0648	103.387	25.3782	0	6.03166	61.5128	2.61766	2.66637	815.946	1.01485
Mismatch repair	g__Nocardioides	30.5107	0.31897	68.0732	0.829387	3.74499	38.728	304.194	9.61914	197.782	0.126033	0.196753	0.523189	0.732144	0.546855	60.1043	0.396695	37.6625	110.178	0.615535	0.552387	138.851	4.6166	0.204179	0.228759	0.215909	1.80637	0.360847	0	2.00982	0.661533	0	0.145052	0.519038	0	3.199	0.237318	327.851	36.4782	8.58444	33.413	35.6452	141.409	25.8413
Mismatch repair	g__Oscillibacter	28.3052	0.295913	144.411	1.75947	14.5722	3.92317	0	22.5673	5.43841	26.5217	30.237	46.0731	20.4179	14.9412	4.50563	34.1539	29.7681	42.7803	76.0581	15.8277	8.02852	1.4767	39.7045	25.334	76.8917	77.5407	20.2793	23.0812	37.6549	3.02595	43.565	26.0254	43.6696	35.0945	24.9822	77.154	163.017	162.399	179.882	188.863	159.26	122.489	221.652
Mismatch repair	g__Paludihabitans	51.3677	0.537015	76.0068	0.926047	33.4513	0	0	10.4507	0	36.4165	7.81056	84.2387	69.7372	3.74956	1.53646	11.8035	0.958988	17.1876	130.641	7.91316	1.50661	6.91111	36.6443	38.9407	174.001	383.23	1.58576	94.6732	171.59	1.17137	138.468	27.2446	15.8019	33.3677	0.40873	129.37	7.89655	34.3181	170.83	51.6351	162.98	42.9907	83.6315
Mismatch repair	g__Parabacteroides	48.8891	0.511103	44.4264	0.541279	10.6885	3.78491	0	42.0407	0	126.685	50.2781	44.7751	12.0785	0.44794	15.6415	13.176	0.324662	12.04	61.7014	68.0815	5.6498	136.037	28.8496	29.7816	19.7595	33.727	0.795713	87.0314	20.8779	394.895	74.0505	59.8578	88.4552	25.1622	0	1.06245	5.16303	148.426	4.02733	10.6153	3.44981	179.38	47.713
Mismatch repair	g__Pseudoflavonifractor	14.4161	0.150711	62.5199	0.761726	14.6827	0	0	7.91527	0	19.8444	36.8227	16.0559	13.1714	0.603081	0	27.7082	0.901971	6.08983	21.2744	10.5678	0	0.908972	8.08796	80.5921	16.3964	57.7621	0.184558	8.92644	17.4564	2.29501	5.354	11.8815	21.5937	25.4073	0.316156	139.544	13.8135	172.717	27.2343	17.9269	60.7257	94.0565	36.3439
Mismatch repair	g__Rikenella	83.2227	0.870038	4.55519	0.0554993	24.1727	1.5286	0	48.0791	0	271.143	122.997	139.901	40.5824	3.44469	4.8463	78.9423	2.69111	32.8274	353.298	89.1868	0	171.302	10.1993	23.1628	26.7559	152.739	9.55328	408.175	44.5315	29.5625	216.891	45.6952	106.635	37.8382	0	0	0	1.40805	0	0	0.980325	1.97177	36.6366
Mismatch repair	g__Ruminococcus	43.7009	0.456863	44.4532	0.541607	38.3745	22.0382	0	20.4319	0	39.721	28.2619	65.2843	77.3185	10.3395	5.59533	58.4121	68.1148	40.7514	98.9976	25.4176	5.77459	14.3375	9.89718	43.1332	86.5643	87.2734	9.47643	28.3519	124.043	7.86378	59.7759	66.356	90.6557	78.4636	14.446	63.2865	38.5766	24.1164	81.8278	45.1586	25.6659	51.9316	55.0697
Mismatch repair	g__Ruthenibacterium	92.8091	0.970258	151.682	1.84806	51.1492	10.0003	0	31.1434	0	30.448	30.1455	122.472	139.979	76.9387	26.6418	193.134	94.6597	154.255	527.081	68.0311	11.6352	20.8456	60.2103	165.414	126.14	279.392	32.3892	33.218	88.0101	3.78855	86.2884	94.3308	78.8667	147.666	16.8891	85.6804	295.135	127.419	89.0876	98.6728	243.397	147.043	261.818
Mismatch repair	g__Thomasclavelia	96.5239	1.00909	127.47	1.55307	219.482	8.24286	495.017	7.0025	6.54217	57.2637	66.141	102.882	54.1305	221.628	0	56.6586	232.592	134.518	2.60428	86.7952	0	309.781	215.373	76.6216	19.5342	38.1453	70.8623	6.79389	47.3708	179.776	47.936	27.9074	77.0049	27.11	19.3684	219.221	467.601	90.7659	32.893	54.3163	166.216	89.9377	6.91381
Mismatch repair	g__Vibrio	140.523	1.46908	0	0	531.298	92.9717	0	93.6785	928.214	13.5581	129.293	260.256	1.22566	3.17728	0	842.184	1.97157	248.878	5.97611	108.255	0	38.1022	0.167287	0.439677	0	0	39.9012	32.4446	6.74875	651.056	0.797546	110.038	53.356	21.7054	0	0	0	0	0	0	0	0	0
Mismatch repair	g__unclassified_c__Caudoviricetes	567.562	5.93348	104.871	1.27772	112.502	1381.16	31.546	94.0604	19.5866	189.527	1366.55	176.269	109.475	1326.55	40.7266	197.718	532.033	981.157	64.6147	5446.79	1086.13	858.128	97.2889	265.45	160.489	114.799	104.506	145.714	133.885	1188	167.188	113.645	136.888	384.474	30.6443	65.591	74.072	154.014	149.36	214.255	107.061	71.9459	76.8946
Mismatch repair	g__unclassified_f__Erysipelotrichaceae	138.681	1.44982	219.414	2.67329	301.384	15.0353	714.537	0.329662	20.7496	72.3943	47.8674	121.817	91.7521	351.608	28.3091	103.191	344.319	293.602	3.63601	108.788	0	441.869	297.447	138.176	4.16024	33.2627	123.213	11.0186	54.1807	234.656	61.5371	28.2874	77.5615	35.7402	91.5425	750.666	93.2909	292.107	14.1186	141.63	170.346	365.111	55.9162
Mismatch repair	g__unclassified_f__Methanobacteriaceae	0	0	73.4245	0.894586	0	0	0	0	0	0	0	0	0	0	0	0	0	0	0	0	0	0	0	0	0	0	0	0	0	0	0	0	0	0	513.24	83.1505	0	0	0	0	6.65158	56.5234	1.25548
Mismatch repair	g__unclassified_p__Bacillota	49.1164	0.513479	662.557	8.07243	0	0	0	0	0	0	0	0	0	0	0	0	0	0	0	0	0	0	1473.49	0	0	0	0	0	0	0	0	0	0	0	4801.01	537.983	0	0	0	0	65.2681	469.255	89.4968
Nucleotide metabolism	g__Alistipes	248.324	1.421	14.3349	0.0894101	71.2662	1.982	0	168.182	0	897.011	255.542	363.216	90.7609	6.10691	15.6417	165.233	6.45673	77.3558	705.092	267.551	13.0865	552.154	47.9096	60.5505	59.1637	413.733	20.9101	1013.62	158.398	166.866	505.572	232.39	929.714	184.272	1.20115	1.79556	1.97752	10.7744	8.40811	3.81288	5.87508	17.5143	77.6555
Nucleotide metabolism	g__Amedibacillus	395.637	2.26398	175.467	1.09442	942.428	13.6742	2150.46	0.89052	31.8937	220.299	161.638	358.144	245.097	757.932	11.4912	278.43	1046.12	705	2.87721	311.47	0	1426.98	871.884	322.688	10.9816	102.515	375.196	18.5565	182.275	742.348	200.048	48.613	241.691	87.4627	85.0067	673.007	57.2662	249.528	11.657	117.01	126.491	231.685	27.5481
Nucleotide metabolism	g__Amedibacterium	115.345	0.660044	148.741	0.927728	193.178	5.90818	400.338	5.97459	9.36034	53.8411	193.154	95.4865	109.589	232.607	3.96894	184.72	213.258	271.136	2.58774	77.2589	0	272.519	161.992	145.687	36.8989	22.4875	87.9745	6.18091	69.7811	176.381	39.6869	71.9941	247.289	69.0988	51.2046	562.106	120.234	251.738	5.69708	103.123	102.102	92.3854	50.0778
Nucleotide metabolism	g__Anaerorhabdus	526.319	3.01179	734.354	4.58032	165.493	7.7842	0	2611.25	0	317.328	1986.33	255.664	545.025	2223.22	1138.56	1010.04	160.565	292.115	34.2627	41.5872	11.6647	120.987	71.2047	162.908	369.213	63.5623	187.999	165.435	413.745	626.389	36.5986	1673.69	904.964	191.998	34.0166	136.109	2738.85	1432.3	18.4533	645.877	1443.53	73.8157	86.2367
Nucleotide metabolism	g__Anaerotignum	86.4369	0.494624	81.4563	0.50806	81.3598	4.42327	0	190.426	0	46.134	49.701	314.654	38.2494	65.7559	40.4491	121.837	24.7662	188.614	55.2088	7.81789	14.698	8.5345	53.1836	36.0723	51.517	94.8851	141.222	70.5049	37.9532	26.0679	75.4967	117.332	99.8453	536.398	42.5658	47.8076	58.2751	59.0762	165.149	167.848	58.5971	63.8212	69.9666
Nucleotide metabolism	g__Anaerotruncus	124.487	0.712358	255.188	1.59166	69.2648	17.8208	0	140.75	0	121.169	40.0401	220.344	58.1447	8.42642	24.6679	107.018	41.3116	99.1247	352.085	22.5123	1.29793	11.8303	493.477	74.191	230.983	332.588	16.1697	148.471	67.8302	6.59237	334.582	96.496	186.391	411.017	37.8707	253.099	239.507	168.007	309.643	387.618	420.258	277.525	203.168
Nucleotide metabolism	g__Angelakisella	53.0496	0.303569	142.827	0.890845	57.3324	4.39361	0	44.3588	0	69.091	43.2446	156.303	24.8426	8.75035	6.20221	34.1773	30.5939	62.2332	147.058	4.62477	0	6.22365	95.9004	44.9488	75.0698	131.484	6.53631	87.0273	27.3087	11.381	118.621	103.639	119.55	70.5911	14.4266	196.809	45.2254	153.21	219.975	118.005	351.845	129.399	56.552
Nucleotide metabolism	g__Bacteroides	281.975	1.61356	71.2354	0.44431	114.278	1.60464	7.43485	851.128	0	782.157	908.36	482.515	37.8115	8.76636	56.6083	73.655	1.60144	49.942	151.124	1233.87	9.8236	402.627	38.5371	32.5888	47.5196	86.515	7.93037	1013.13	82.8138	184.425	85.7058	829.95	127.473	749.353	0.423991	12.6457	4.87432	125.129	6.27851	49.2043	11.1809	266.939	164.442
Nucleotide metabolism	g__Bilophila	304.117	1.74027	344.093	2.14618	168.246	0	0	371.545	0	543.759	132.451	200.405	1380.59	3.81522	2.68142	132.991	155.931	20.4997	920.878	466.313	5.48153	81.8825	114.826	551.769	665.472	862.24	25.6596	288.042	250.135	85.099	705.136	180.959	495.584	311.123	118.873	351.179	491.306	208.227	398.035	457.892	267.691	269.116	534.522
Nucleotide metabolism	g__Blautia	59.8802	0.342657	115.055	0.717619	41.1312	1.40075	0	65.1695	0	46.8914	45.2427	97.8288	58.4911	99.7959	18.7366	51.3784	21.937	81.3667	111.816	51.7077	3.91093	15.5474	44.3839	34.1092	59.7622	65.0979	34.8791	51.8984	94.8898	4.34885	43.7746	154.739	52.3712	343.801	27.0832	74.2565	50.1035	101.611	248.047	164.341	154.165	87.3008	128.583
Nucleotide metabolism	g__Breznakia	1285.04	7.35347	34.3694	0.214369	2942.54	98.2205	6567.54	4.08844	88.5411	677.05	568.754	1162.58	653.157	2760.3	11.2434	1156.72	3264.03	2923.38	11.1531	971.47	1.85597	4337.17	2561.49	952.285	18.8655	282.631	1190.75	50.8487	550.725	2245.75	605.158	227.108	1263.16	402.597	69.4491	84.5957	44.5338	24.1315	1.36455	10.3661	40.979	2.41978	31.4851
Nucleotide metabolism	g__Candidatus_Avidesulfovibrio	119.606	0.68443	69.2943	0.432203	67.8637	0	0	151.197	0.993342	91.0503	51.7117	90.5112	720.54	2.55741	3.21366	45.5847	63.4621	4.72635	378.961	182.457	0.891384	21.6044	14.3283	214.898	247.047	372.643	11.4934	75.1887	96.293	44.9875	233.65	74.4645	219.364	106.502	9.77161	71.1463	190.265	99.958	4.63136	1.72753	93.5735	1.55121	151.024
Nucleotide metabolism	g__Candidatus_Stoquefichus	90.8138	0.51967	100.772	0.628534	18.7119	0	0	160.761	0	90.0157	435.356	26.1412	26.2798	544.469	0.423441	342.162	2.92586	96.1096	3.24976	393.024	0.885223	2.57317	7.9357	22.8927	7.70133	3.59333	5.82399	13.9202	18.0792	33.4679	3.64482	142.121	135.468	186.678	16.7617	121.781	7.73371	272.469	20.8785	87.7431	230.374	70.3075	78.8962
Nucleotide metabolism	g__Cetobacterium	142.689	0.81652	1.88121	0.0117335	1032.24	0	0	0.608636	0	0.0864431	1.83631	24.226	318.518	0.189668	3.44925	1.59866	39.9011	38.2483	169.58	0.290546	7.42431	49.2931	12.0326	31.1401	135.893	378.93	0.129786	1874.41	54.8427	33.5118	64.9597	2.67455	4.28656	0.370318	4.8882	0.137798	0	0	2.96466	0	0.0728102	8.53954	0.327834
Nucleotide metabolism	g__Christensenella	250.817	1.43527	101.651	0.634017	37.6393	1.23155	0	12.491	0	67.0343	30.142	185.7	557.995	4.44295	23.3536	26.2337	75.2011	68.4212	285.124	10.3924	1.72281	26.1776	139.899	1715.92	1299.61	1321.22	72.2199	58.8815	378.91	9.09131	511.879	193.414	34.2864	375.888	32.0573	26.6742	156.795	113.97	37.3112	225.492	69.772	36.0659	216.719
Nucleotide metabolism	g__Clostridium	1589.13	9.0936	1135	7.07924	2198.56	3396.4	416.662	2757.66	12.9653	1155.31	1916.83	2631.79	2592.98	977.17	2738.44	2825.25	4331.44	1022.61	984.711	998.188	337.116	1158.95	657.772	1513.65	2955.63	1159.84	692.243	1289.48	1298.69	156.615	572.692	1839.53	1355.03	1729.77	892.408	1775.53	598.285	1405.01	1138.71	1118.74	1637.82	871.688	776.81
Nucleotide metabolism	g__Copranaerobaculum	173.29	0.991631	96.2849	0.60055	366.676	14.1115	846.256	4.05448	15.0131	89.1532	215.092	180.803	188.442	306.746	11.5062	157.389	384.805	246.588	3.77767	128.505	0	537.419	331.918	169.154	49.6207	47.5952	133.586	10.5966	104.171	316.672	79.3822	64.8496	161.97	32.8554	44.6865	142.349	49.0424	38.1361	10.143	327.139	219.142	8.16356	27.7632
Nucleotide metabolism	g__Coprobacillus	139.368	0.797515	87.9462	0.548539	41.1903	0	0	465.137	0	182.941	632.381	61.4659	71.4345	763.648	8.66355	516.99	7.64921	62.7188	9.48119	643.589	0	5.51661	4.42134	26.3268	7.85778	8.39778	26.911	16.5378	36.988	43.8405	4.2593	243.427	92.1385	197.129	6.68632	104.265	89.0204	191.097	13.0192	61.3068	213.609	60.0451	52.468
Nucleotide metabolism	g__Desulfovibrio	277.477	1.58783	352.195	2.19672	175.43	1.33543	0	140.399	6.91051	1658.86	102.471	245.867	318.261	2.36701	3.08556	82.7037	217.72	37.261	1300.81	178.625	2.88219	112.423	457.12	335.059	492.758	177.103	19.7905	456.344	134.921	27.7523	673.587	234.501	370.184	357.791	290.087	321.893	126.39	60.08	157.245	307.165	76.0652	1116.77	714.064
Nucleotide metabolism	g__Dorea	60.1134	0.343991	142.536	0.889024	47.4718	1.52208	0	64.2601	0	26.1279	53.7184	98.4334	60.2124	82.8076	190.549	180.118	30.5623	88.3618	23.8719	10.7615	22.718	1.63977	29.243	57.4438	61.7206	41.1788	23.9179	36.794	135.482	15.7345	30.7858	148.515	98.6507	140.799	40.7563	47.9361	295.375	295.398	152.841	119.762	108.422	164.634	57.6956
Nucleotide metabolism	g__Duncaniella	198.526	1.13604	0.427483	0.0026663	3.34068	103.546	0	0.71199	10.8164	85.7369	581.481	70.991	0	136.557	0	6.42104	2.73323	20.2444	1.55925	688.803	3631.27	475.809	0	0	0.191567	0	107.29	1.15498	0	1.68565	0.616325	1.72228	2.95472	20.1255	0	0	0	0	0	0.111715	0	3.6079	0.127738
Nucleotide metabolism	g__Enterocloster	17.8236	0.101993	131.203	0.818339	9.43025	1.09723	4.76511	17.8781	0	8.97143	14.0043	18.039	7.30531	6.49621	0.638187	14.8454	7.33064	15.1148	22.7602	14.28	2.74419	9.91013	20.413	18.5005	25.6224	42.2545	4.1153	18.2418	12.7813	8.89111	34.2006	25.0673	7.62925	141.381	22.0436	69.48	96.5639	184.407	133.059	250.038	218.428	77.09	129.714
Nucleotide metabolism	g__Eubacterium	216.615	1.23955	173.65	1.08309	100.345	75.0338	0	127.057	4.15803	145.156	542.295	171.09	98.1567	135.726	9.62581	39.8971	22.232	38.846	112.538	660.329	2567.38	339.318	52.3866	131.257	64.8021	193.585	112.932	80.3755	307.066	9.94137	37.8065	89.5662	30.1634	199.383	45.5941	103.62	80.3276	224.877	415.645	255.441	137.244	181.927	118.173
Nucleotide metabolism	g__Faecalicatena	152.296	0.871492	182.177	1.13628	273.452	4.81693	655.532	22.0529	6.33696	63.8859	107.637	234.372	72.1	293.414	46.6076	115.118	281.364	189.155	20.5553	83.3506	3.87301	390.111	250.568	111.045	88.1404	52.204	96.3255	44.1173	76.9231	202.586	62.1141	322.755	106.932	291.425	66.9902	124.026	101.018	255.417	496.926	291.248	115.396	110.158	78.4124
Nucleotide metabolism	g__Hungatella	16.5227	0.0945491	229.074	1.42878	9.07839	0	0	6.9117	0	12.403	7.13541	23.9082	7.88367	1.61649	5.45661	8.00382	3.26336	6.0287	14.6429	6.53411	0	1.05229	14.6461	6.56779	21.7633	21.7281	1.74721	17.5818	10.3652	2.00973	52.1854	20.4118	16.383	196.374	39.6907	91.4755	170.036	352.856	328.508	328.323	566.842	104.049	79.8859
Nucleotide metabolism	g__Hydrogenoanaerobacterium	38.1775	0.218466	193.348	1.20595	43.9543	1.27479	0	56.5311	0	46.8645	29.4009	78.5635	30.1601	9.9366	7.45432	25.0623	18.5335	35.6648	124.501	10.1693	4.8647	13.6151	60.336	34.8234	60.0072	102.736	8.87726	51.5473	59.7595	6.35948	47.8668	38.9534	75.9299	61.5788	29.2929	94.1536	412.531	221.651	116.358	375.644	210.545	83.0412	196.916
Nucleotide metabolism	g__Intestinimonas	37.2967	0.213425	132.4	0.825808	29.7242	0	1.43322	35.5908	1.53062	48.225	87.1783	59.2565	37.7058	1.51994	16.1221	88.2748	5.58734	11.1658	44.9034	30.4903	2.43156	7.07696	22.1363	21.38	84.3603	131.999	9.86431	32.7512	63.4479	13.4786	77.8414	42.3586	66.459	44.6073	3.74314	165.716	62.9144	100.68	217.428	56.4211	117.113	139.821	327.765
Nucleotide metabolism	g__Kineothrix	38.7696	0.221854	342.895	2.13871	40.497	0	0	59.6783	0	14.5594	2.36565	71.4355	7.84191	29.9793	3.37101	18.1126	2.77392	18.1253	200.16	53.451	3.0779	6.07189	98.1668	15.8041	33.6205	66.5239	7.4658	52.8277	68.3978	0	104.055	55.1175	10.8183	118.788	125.771	262.007	22.8478	79.354	884.619	685.491	165.2	294.423	566.341
Nucleotide metabolism	g__Lachnoclostridium	67.4542	0.385998	421.398	2.62835	61.7041	2.15979	0	82.4199	0	34.2625	39.2116	103.545	194.446	58.1492	247.929	140.711	38.9418	20.2082	81.4818	32.9171	27.4625	12.827	30.0019	47.2274	114.717	92.244	8.17964	76.729	105.613	11.2669	49.7595	132.941	36.3168	140.252	99.9088	111.159	446.161	863.271	692.383	349.192	558.928	332.77	338.809
Nucleotide metabolism	g__Longicatena	103.555	0.592582	166.583	1.03901	227.079	3.45974	520.841	0.198608	3.28877	55.2155	41.3536	90.8111	58.7659	219.796	11.6908	86.9043	239.853	213.327	24.4836	79.5127	1.73057	347.358	187.455	149.198	7.51283	30.0952	94.152	7.3908	46.7447	165.244	46.3579	25.9214	85.5561	35.3652	98.2239	590.944	99.2517	225.796	16.664	135.696	143.806	133.953	54.9096
Nucleotide metabolism	g__Methanobacterium	0	0	206.753	1.28956	0	0	0	0	0	0	0	0	0	0	0	0	0	0	0	0	0	0	0	0	0	0	0	0	0	0	0	0	0	0	1466.92	240.39	0	0	0	0	13.462	138.732	1.27478
Nucleotide metabolism	g__Methanobrevibacter	88.2345	0.50491	1158.4	7.22518	15.5477	1.63853	6.31633	3.55064	0.65159	11.0313	1.7272	6.61955	11.0427	6.53013	0	20.3581	7.73514	2.78789	4.02898	44.1954	26.3802	2.0863	2342.52	13.7047	26.0728	6.00842	17.9883	2.01069	3.24049	0	2.05668	25.9403	10.9736	24.2952	8071.13	1350.58	4.49579	3.35269	2.14886	4.80374	108.424	795.442	85.2167
Nucleotide metabolism	g__Methyloceanibacter	156.191	0.893782	3.2664	0.0203732	9.0065	1727.98	15.9295	4.80773	1269.09	0.748682	17.4295	9.23249	22.0449	34.7205	644.794	15.8889	84.3423	14.2465	9.59489	18.7712	661.961	20.6828	7.44593	21.5562	4.95609	10.9809	1.13984	0	17.1907	13.7289	0.662029	11.5164	13.2242	2.05926	0	0	19.4258	2.92977	0.495372	1.19324	1.44126	3.07655	0.835563
Nucleotide metabolism	g__Mucispirillum	28.9889	0.165885	124.825	0.77856	11.8478	0	0	2.81687	0	70.892	0.580288	98.803	0	4.11838	0	15.8992	14.4815	55.3442	0.631125	14.4604	0	30.1197	194.161	0	0	73.0236	7.47796	77.3705	79.7784	38.3429	6.42678	12.0645	47.7652	13.2619	49.4974	12.75	0	5.22279	27.0498	0	0.757875	1027.3	0.845752
Nucleotide metabolism	g__Nitratidesulfovibrio	102.825	0.588405	74.7942	0.466507	72.6796	1.23149	0	95.2678	0	367.924	36.6578	81.1291	256.524	1.82299	4.23339	42.8546	80.0011	9.60112	384.352	85.9957	0	47.2759	98.4954	165.14	204.677	223.017	6.66624	121.573	64.9451	23.5634	246.042	74.2271	169.652	119.211	45.4212	92.9294	64.3766	32.7869	51.9806	54.098	29.2124	154.03	148.312
Nucleotide metabolism	g__Nocardioides	62.4278	0.357235	103.093	0.643014	9.89942	85.8313	585.565	19.7473	358.124	0	0.550522	0.510773	2.02312	1.14062	104.342	0.301411	64.2999	228.9	5.10931	2.89383	361.116	18.0054	0.580548	4.55047	0.315158	4.22662	1.12699	0	5.81781	3.43631	0	1.32921	3.09109	0	5.91966	0	480.754	47.2777	14.255	43.9629	48.1333	251.597	35.9383
Nucleotide metabolism	g__Parabacteroides	86.1474	0.492967	72.7087	0.4535	15.0917	0.721186	0	24.5683	0	195.685	34.7997	70.0081	55.4517	3.11523	10.2937	18.1838	4.30214	14.1336	130.092	102.498	0	231.817	47.9778	73.415	26.7585	66.8182	0.768627	105.177	15.4458	855.816	134.104	89.7955	206.519	51.0653	0.116856	2.9685	9.80711	279.297	1.69898	33.8786	15.8983	240.508	70.2058
Nucleotide metabolism	g__Photobacterium	152.796	0.874357	0	0	1551.79	70.8117	0	25.0964	0	184.967	42.4625	263.095	4.36025	0	0	684.889	4.31624	808.349	4.00888	39.4092	0	20.6133	0	0.469851	0	0	83.9245	0	33.0829	4.41395	0	162.038	584.486	11.3066	0	0	0	0	0	0	0	0	0
Nucleotide metabolism	g__Pseudoflavonifractor	46.2417	0.264612	209.463	1.30646	41.3757	0	0	47.9253	0	59.0868	124.113	69.0763	32.2137	7.64917	25.8833	110.096	18.3414	65.8135	84.1505	39.8169	12.7464	11.814	28.0367	34.0662	54.3844	157.787	14.4092	40.5832	67.3505	10.9277	46.6705	36.7519	83.375	62.8049	11.6768	347.798	130.156	341.859	175.917	120.93	267.504	213.29	276.035
Nucleotide metabolism	g__Ruminococcus	127.703	0.730764	117.233	0.731209	136.411	48.2759	0	71.0691	2.64531	125.17	83.1152	209.348	203.024	86.5984	35.658	157.124	62.0225	94.815	167.248	94.605	8.55373	25.2805	61.7292	329.299	210.408	342.458	28.2191	99.5193	289.953	17.1525	106.657	228.668	247.697	258.367	22.2579	118.393	61.5819	113.378	294.764	113.954	95.2717	123.272	112.227
Nucleotide metabolism	g__Ruthenibacterium	175.63	1.00502	237.117	1.47895	79.4226	42.6589	0	63.6734	1.02256	68.2385	58.2427	196.015	232.838	173.389	55.7397	428.914	218.627	316.222	836.732	196.216	14.808	49.7435	79.0184	332.496	261.186	469.305	65.1052	49.586	171.628	10.9334	119.662	206.234	152.634	318.623	22.9203	156.356	454.153	253.153	169.068	166.635	318.446	209.005	384.317
Nucleotide metabolism	g__Sebaldella	12.3235	0.0705196	205.316	1.2806	0.131408	0	0	0	0	0.629282	0.264172	1.36346	0	0	1.80497	0	0	0.452098	0	0	0	0	346.376	0.390507	0.728757	1.67407	0	1.62759	0	0	14.2631	0	0	0	1478.33	180.588	0	0	0	3.91416	23.5831	131.905	29.5273
Nucleotide metabolism	g__Solobacterium	160.238	0.916941	3.0472	0.019006	249.675	5.35858	439.866	16.9919	4.24481	65.1672	625.107	197.025	318.481	187.867	31.8323	232.454	231.117	161.257	4.74226	77.3595	0	373.913	195.414	88.5621	141.655	58.5271	67.6548	7.61645	127.649	310.983	56.0313	155.309	329.339	45.9415	3.67183	0.751508	0	2.8146	1.59227	4.5619	4.13725	6.57073	3.32471
Nucleotide metabolism	g__Thomasclavelia	45.9799	0.263114	234.653	1.46358	43.2273	2.56638	10.0135	250.554	2.3628	133.851	28.7517	44.4516	13.6654	28.7058	4.03065	51.2292	3.62091	77.3901	6.61927	125.335	41.367	72.5341	34.695	18.326	5.13996	6.45607	122.348	19.9889	9.27522	15.0339	25.0227	65.9585	73.3803	43.4954	32.9879	310.785	988.42	141.026	57.0154	64.6494	340.789	154.755	21.4453
Nucleotide metabolism	g__Treponema	136.291	0.77991	45.0427	0.280941	59.6788	235.803	0.641281	8.79415	7.37481	114.906	109.253	112.738	12.6687	152.753	13.5174	83.2521	24.2931	431.241	21.5422	51.6519	1217.76	438.236	84.3798	37.9144	65.7872	52.7147	73.1425	11.226	36.1206	41.1695	435.716	66.9197	61.1049	26.449	25.27	14.0937	45.0669	14.0273	19.1866	21.9229	29.044	43.9391	192.834
Nucleotide metabolism	g__Vibrio	208.653	1.19399	1.08484	0.00676639	917.792	142.596	0	177.497	492.501	33.8799	231.065	460.186	5.53092	5.12094	2.43911	1502.84	2.1577	396.442	10.5552	209.427	0	109.511	1.53328	1.14854	0.386926	0.546974	76.4651	0.770298	13.8164	1141.9	3.3748	192.946	84.4375	42.7187	4.69319	0	4.2052	0	0	0	0	0.865191	0
Nucleotide metabolism	g__unclassified_c__Caudoviricetes	849.919	4.86355	46.1541	0.287873	44.6695	1335.56	23.0186	196.408	1346.34	114.146	2316.78	149.058	95.3693	2272.92	344.369	278.172	742.551	1682.61	50.109	9365.09	235.969	773.291	49.9617	487.815	62.9726	46.4053	92.1375	174.83	93.0182	2133.86	190.619	77.8441	87.3182	634.35	1.57398	74.0352	24.1029	90.7569	53.4382	62.013	72.5615	20.9788	15.9264
Nucleotide metabolism	g__unclassified_f__Erysipelotrichaceae	78.8655	0.451298	271.862	1.69566	157.782	3.43121	313.541	2.24062	3.76344	36.4352	108.218	72.2221	87.3912	138.969	13.6631	91.2537	150.96	145.771	2.59478	59.1741	0.660114	226.374	138.614	97.8244	23.3431	22.5902	60.4453	3.88518	47.1295	133.236	35.5331	37.0538	117.713	34.154	91.0088	1011.22	160.737	383.961	43.6297	173.29	184.786	322.656	75.4753
Nucleotide metabolism	g__unclassified_f__Nitrososphaeraceae	154.655	0.884995	90.5388	0.56471	9.0264	619.878	20.8905	0.854817	1618.15	1.3498	3.0649	10.1898	2.17055	21.2002	688.05	11.5385	65.8306	11.8699	14.3193	23.9218	1210.94	217.057	1.98704	2.90098	0.162832	1.87666	0.688282	0.239779	43.314	19.965	0.359229	7.56762	7.77757	2.5158	16.8388	0.224207	502.483	74.8296	26.5184	23.1845	98.8281	44.0643	27.8777
Nucleotide metabolism	g__unclassified_p__Bacillota	101.568	0.581211	1530.19	9.54411	0	0	0	0	0	0	0	0	0	0	0	0	0	0	0	0	0	0	3047.05	0	0	0	0	0	0	0	0	0	0	0	11152.4	1232.48	0	0	0	0	156.212	1014.78	215.838
Phospholipase D signaling pathway	g__Acholeplasma	1.35358	0.38318	0	0	0	0	0	0	0	2.07663	0	8.99886	2.07232	0	0	0.556008	0	0	0	0	0	0	0	2.0817	2.10428	1.69983	0	0	0	0	0	20.526	0	0.491754	0	0	0	0	0	0	0	0	0
Phospholipase D signaling pathway	g__Agathobaculum	0	0	2.15129	1.27165	0	0	0	0	0	0	0	0	0	0	0	0	0	0	0	0	0	0	0	0	0	0	0	0	0	0	0	0	0	0	0	0	0	0.292285	3.57239	0.492691	2.19924	1.25619	11.5488
Phospholipase D signaling pathway	g__Alpharetrovirus	2.31337	0.654885	0.0762881	0.0450946	0	0	0	0	0	0	0	0	0	0	68.2156	0	0	0	0	0	0	0	0.497214	0.688394	0	0	0	0	0	0	0	0	0	0	0	0	0	0	0	0	0	0	0.686593
Phospholipase D signaling pathway	g__Angelakisella	0.692244	0.195965	0.958816	0.566765	0	0	0	0.449231	0	1.31521	0.449722	1.33912	0	0	0	0	0	0.384821	4.10231	0	0	0	1.91782	0	0.465233	3.07994	0	2.39779	0	0.256854	0.748395	1.74062	1.54946	0.570786	0	0	0	0	0	0	8.62934	0	0
Phospholipase D signaling pathway	g__Astathelohania	6.65966	1.88526	0	0	0	0	0	0	0	0	0	0	1.06694	0	0	0	0	0	0	0	0	0	3.45588	0	0	0	0	0	195.267	0	0	0	0	0	0	0	0	0	0	0	0	0	0
Phospholipase D signaling pathway	g__Bacteroides	14.4733	4.0972	2.04459	1.20858	6.82707	0	0	36.2993	0	30.3234	35.5011	17.1587	1.47308	0.276854	0	4.06417	0.585693	5.41042	9.14348	44.9114	0	12.9221	1.84679	23.9374	0.831552	33.4794	0	54.6359	1.26375	36.726	3.40321	34.6607	9.97604	28.5419	0	0.322075	0	5.97048	0	1.02026	0	4.05985	7.02864
Phospholipase D signaling pathway	g__Bilophila	23.3962	6.62316	15.8707	9.38129	11.3942	0	0	38.3706	0	19.9722	11.1127	11.7846	115.989	0.57481	0	9.92757	10.5707	1.0778	58.6343	34.8157	0	15.5203	8.85949	45.0172	51.4439	79.1941	1.21619	22.453	23.8293	7.30161	55.4038	14.3278	34.3198	18.776	4.05689	18.4289	29.3985	20.4132	12.2793	8.14754	17.1481	2.76788	30.1956
Phospholipase D signaling pathway	g__Bradyrhizobium	2.30511	0.652544	0.0524914	0.0310282	0.477746	0	2.38057	0	0	0	0	0	0	0	0	0	0	0	0	0	65.9222	0	0	0	0	0	0	0	0.372654	0	0	0	0	0	0	0	0	0	0	0	0	0.100034	0.372389
Phospholipase D signaling pathway	g__Breznakia	93.9563	26.5978	0.421358	0.249068	222.654	9.03603	525.812	0	4.09023	54.4461	32.6974	96.7944	50.711	257.33	0	52.2367	260.461	188.517	0	71.8071	0	325.68	201.259	73.7467	0	15.7841	94.6674	3.38512	42.8646	161.364	37.5078	0.307169	31.4997	4.02908	3.79222	0	0	0	0	0	0	0	0
Phospholipase D signaling pathway	g__Candidatus_Accumulibacter	15.1971	4.30209	0.166493	0.0984155	47.7011	0	32.9421	0	0	5.30694	0	3.4611	39.7886	0	0	0	0	0.497308	0	0	0	6.16806	48.7422	18.1406	54.4108	31.4468	0	0.619737	18.2658	32.8615	113.157	0	2.40286	0	0.838664	0	0	0	0	0	0.659773	0	0
Phospholipase D signaling pathway	g__Capsaspora	4.84053	1.37029	0.49391	0.291955	0	0	0	0	0	0	0	0	0	0	141.346	0	0	0	0	0	0	0	1.24543	2.6246	0	0	0	0	0	0	0	0	0	0	0	1.47953	0.470347	1.22571	0	0	0.223361	0	1.04624
Phospholipase D signaling pathway	g__Cetobacterium	3.39836	0.962031	0	0	27.2395	0	0	0	0	0	0	0.755415	8.12251	0	0	0	1.54388	0	3.10545	0	0	2.23667	0.224682	0.649071	4.57905	11.7886	0	37.3978	0.735953	0	3.41944	0.152942	0	0	0	0	0	0	0	0	0	0	0
Phospholipase D signaling pathway	g__Christensenella	12.6223	3.57321	2.60473	1.53968	2.93235	0	0	0	0	3.13209	0.151107	8.30497	27.8932	0	0	0.434847	2.36151	2.59639	11.6666	0.389888	0	0	4.31145	94.6861	70.0576	70.1538	3.22904	1.2897	18.3303	0.172606	28.7332	8.04402	0.416496	19.3828	0.144789	0.69968	5.51467	4.74322	1.28113	4.27869	0.854971	0.506371	5.419
Phospholipase D signaling pathway	g__Clostridium	22.0982	6.25571	6.26077	3.7008	37.6027	29.8004	1.46861	8.71593	0	13.6653	47.1826	59.7745	36.394	1.59211	5.73236	43.313	77.2893	22.3515	8.10211	6.02327	5.03554	21.6134	9.02961	36.6502	44.4777	18.4548	5.7865	28.1147	14.3553	0.266367	9.06389	27.4034	19.1987	24.4891	1.12564	2.51389	8.54042	2.37684	7.1441	4.00492	23.7832	2.02325	4.83459
Phospholipase D signaling pathway	g__Cucumispora	12.1073	3.42742	0	0	0	0	0	0	0	0	0	0	0	0	0	0	0	0.32005	0	0	0	0	0	0	0	0	362.9	0	0	0	0	0	0	0	0	0	0	0	0	0	0	0	0
Phospholipase D signaling pathway	g__Desulfocapsa	1.3683	0.387347	0.233423	0.137979	0	0	0	0	0	0	0	0	0	0	0	0	0	0	0	0	0	0	0	0	0	0	0	0	0	0	41.0489	0	0	0	0	0	0	0	0	0	0	0	2.10081
Phospholipase D signaling pathway	g__Desulfovibrio	0.580897	0.164444	12.032	7.11221	0	0	0	0	0	3.38662	0	2.90286	0	0	0	1.16582	0	3.6496	0	0	0	0	0	0.311776	3.46674	0	0	0.649724	0	0	0	1.47391	0.419855	0	14.0163	6.2902	0	0.685662	0.538448	2.88947	1.622	50.7068	31.5389
Phospholipase D signaling pathway	g__Fumia	0.517377	0.146462	0.974796	0.576211	0	0	0	0.241894	0	0	0	2.39713	0.690775	0	0	0	0	1.40543	1.01951	0	0	0	0.795542	0	0.289478	3.21866	0	1.92982	1.88927	0	0	0.63163	0.333731	0.678439	0	0	0	0	3.28753	0.28679	0.388102	0.805902	4.00484
Phospholipase D signaling pathway	g__Gaiella	0.857583	0.24277	0.646846	0.382357	0	0	0	0	4.56089	0	0	0	0	0	1.29487	0	0	0	0	0	19.8717	0	0	0	0	0	0	0	0	0	0	0	0	0	0	0	2.48219	0	0	0.499339	0	2.84008	0
Phospholipase D signaling pathway	g__Gordonibacter	1.33501	0.377924	2.16462	1.27953	0	3.86447	0	2.61063	0	0.377305	8.55321	0.565966	0.677741	1.9432	0	2.50029	3.24894	1.62642	0	0.613032	0	0	0	1.94517	0.245783	1.04235	1.01217	0.253352	2.48905	1.35696	0	1.14947	1.9646	2.01032	0	0.32993	8.77503	1.8719	0.232206	7.4684	0.804098	0	0
Phospholipase D signaling pathway	g__Hamiltosporidium	3.7027	1.04819	0	0	0	0	0	0	0	0	0	0	0.789457	0	0.654551	0	0	0	0	0	0	0	0.5901	0	0	0	0	0	109.047	0	0	0	0	0	0	0	0	0	0	0	0	0	0
Phospholipase D signaling pathway	g__Hydrogenoanaerobacterium	1.01141	0.286317	16.4555	9.727	1.00668	0	0	4.2677	0	1.42837	1.79889	2.14259	0	0.204344	1.05735	0.215122	0	1.15446	4.41787	0.386794	0	1.59097	0.958912	1.1506	1.3957	0.328836	0.239486	0	1.04698	0	0	0.217578	2.47914	2.85393	0.407328	12.9906	33.6757	19.049	14.0352	29.3481	21.5829	9.57875	7.43198
Phospholipase D signaling pathway	g__Ligaoa	2.62813	0.743988	2.70531	1.59913	2.06562	0	0	4.20925	0	5.40145	3.17201	7.48814	3.28841	0.524281	0	1.54663	3.4884	1.77936	6.23386	0.44712	0	0	7.29065	1.71069	3.33825	4.21225	0.553674	2.51937	2.21883	0.922121	3.35497	2.2861	5.96459	4.82786	0.215042	2.41277	3.77251	1.08244	1.32694	0.684911	5.12684	0	9.7263
Phospholipase D signaling pathway	g__Mailhella	2.81184	0.795994	1.74911	1.03392	1.18267	0	0	1.58331	0	1.67808	3.69841	0	3.01429	0	0	1.51639	1.03213	0	8.54269	12.9508	0	0	3.37966	10.814	7.92523	5.40854	0	3.94378	1.2432	0	7.03386	0.766847	3.27663	5.36459	2.09163	2.62758	0	0	0	0	2.01024	1.02065	7.99192
Phospholipase D signaling pathway	g__Massilibacteroides	2.52935	0.716026	0	0	0.633416	0	0	5.51192	0	1.46047	5.37645	3.70739	0.403599	0	0	1.21822	0	0.242135	10.722	0.365064	0	3.00317	0	0.434384	0.292731	4.75888	0	9.20321	0.164694	0.646463	6.35715	4.7916	15.9891	0.598577	0	0	0	0	0	0	0	0	0
Phospholipase D signaling pathway	g__Mesorhizobium	1.47315	0.417028	0	0	0	0	1.20769	0	0	0	0	0	0	0	0	0	0	0	0	0	42.4908	0	0	0	0	0	0	0	0	0	0	0	0.495829	0	0	0	0	0	0	0	0	0	0
Phospholipase D signaling pathway	g__Methyloceanibacter	4.22875	1.1971	0	0	0	43.0715	0	0.292523	33.021	0	0.624408	0	0.483233	0.72711	16.2616	0.73544	4.43465	0	0.384163	0.842086	21.3208	1.19858	0	0.712809	0	1.17008	0	0	0	0.587712	0	0.466007	0	0.528963	0	0	0	0	0	0	0	0	0
Phospholipase D signaling pathway	g__Methylotenera	0	0	1.86806	1.10423	0	0	0	0	0	0	0	0	0	0	0	0	0	0	0	0	0	0	0	0	0	0	0	0	0	0	0	0	0	0	0	0	0	0.660819	0	16.1517	0	0	0
Phospholipase D signaling pathway	g__Monosiga	1.74081	0.492799	0	0	0	0	0	0	0	0	0	0	0	0	49.6575	0	0	0	0	0	0	0	0	2.56664	0	0	0	0	0	0	0	0	0	0	0	0	0	0	0	0	0	0	0
Phospholipase D signaling pathway	g__Mycoplasma	0	0	2.53241	1.49693	0	0	0	0	0	0	0	0	0	0	0	0	0	0	0	0	0	0	0	0	0	0	0	0	0	0	0	0	0	0	0	0	0	10.8411	0	3.22489	7.19752	0.913593	0.614573
Phospholipase D signaling pathway	g__Nematocida	0	0	1.79637	1.06185	0	0	0	0	0	0	0	0	0	0	0	0	0	0	0	0	0	0	0	0	0	0	0	0	0	0	0	0	0	0	0	0	0	14.345	0.834897	0	0	0	0.98746
Phospholipase D signaling pathway	g__Neopyropia	4.4364	1.25588	0	0	0	0	0	0	0	0	0	0	0	0	0	0	0	0	0	0	0	0	1.74348	0	0	0	0	0	131.348	0	0	0	0	0	0	0	0	0	0	0	0	0	0
Phospholipase D signaling pathway	g__Paludihabitans	2.46688	0.69834	8.34871	4.935	1.29595	0	0	0.218124	0	1.37229	0.218362	4.66654	2.18237	0	0	0.415408	0	0.371552	5.78205	0	0	0	1.23446	1.33568	8.7894	24.0379	0	6.10628	3.80211	0	7.95056	1.47174	0	2.75552	0	15.2528	3.24455	4.0955	15.8284	7.25021	20.096	3.67905	5.69192
Phospholipase D signaling pathway	g__Parabacteroides	3.49795	0.990222	2.80502	1.65807	0.750515	0	0	0.0609619	0	7.35688	1.20364	1.75937	0.0870443	0	0	0.553591	0.23844	0.442924	4.78672	4.74554	0	14.0097	1.19045	2.61857	1.02534	0.606666	0	0.835329	0.230226	44.9286	4.087	3.25774	7.20058	2.96257	0	0.322075	0	12.1172	0	1.15829	0	10.2526	1.39498
Phospholipase D signaling pathway	g__Paraclostridium	5.04756	1.42889	0.917139	0.542129	7.53062	6.73342	0	14.9982	0	2.44912	39.4082	1.75597	14.3624	0	0.80492	9.54227	29.741	0.271639	0	1.39467	0	1.12304	0	0.336583	5.05617	0	0	5.90108	0.5676	0	0	3.45634	2.62497	3.36846	0	0	0	0	8.25425	0	0	0	0
Phospholipase D signaling pathway	g__Paracoccus	1.27334	0.360466	0	0	0	0	0	0	32.104	0	0	0	0	0	0	0	6.0963	0	0	0	0	0	0	0	0	0	0	0	0	0	0	0	0	0	0	0	0	0	0	0	0	0	0
Phospholipase D signaling pathway	g__Photobacterium	1.50456	0.425922	0	0	14.8353	0	0	0.283725	0	3.38298	1.70421	1.35321	0.405116	0	0	6.38573	0	1.45827	0	0.732873	0	0	0	0	0	0	1.51254	0	0	0	0	1.09934	11.7433	0.240331	0	0	0	0	0	0	0	0	0
Phospholipase D signaling pathway	g__Plesiomonas	2.44594	0.692412	0	0	0	0	0	0	0	0	0	0.374952	8.98007	0	0	0	0	0	7.0686	0	0	0	0	0.644336	0.651326	0.92074	0	45.9896	0.366443	0	8.38202	0	0	0	0	0	0	0	0	0	0	0	0
Phospholipase D signaling pathway	g__Pseudomonas	7.86719	2.2271	0.346176	0.204628	0	0	0	0	0	0	0	0	0	0	10.0672	0	0	0	0	0	0	0	0	0	0	0	0	0	0	225.949	0	0	0	0	0	0	0	0	0.0547978	3.06079	0	0	0
Phospholipase D signaling pathway	g__Rikenella	1.39985	0.396279	0	0	0.223263	0.307225	0	0.0754709	0	4.23386	0.301465	2.51344	0.640164	0	0.714769	1.65101	0	0	5.15067	0.451009	0	3.1968	0	0.459329	0.852012	4.51254	0	3.69693	2.72076	1.63292	4.99473	0.511019	2.39279	0.763339	0	0	0	0	0	0	0	0	0
Phospholipase D signaling pathway	g__Romboutsia	2.42874	0.687544	0	0	1.70094	1.32425	0	0	0	0	0	2.03024	1.59968	3.13385	0	7.746	3.72207	13.6811	1.88651	0.404448	0	0	0	15.8893	6.38838	2.19509	0.166945	4.6881	3.06142	0	0	0.849806	1.86356	0.530523	0	0	0	0	0	0	0	0	0
Phospholipase D signaling pathway	g__Roseburia	0.163016	0.0461477	1.29377	0.764762	0	0	0	0	0	0	0	0.478663	0	0	0	0	0	0	0.563984	0	0	0	1.14253	0.411279	0	0	0	0.428541	0.4678	0	0.668778	0.388862	0	0.340043	0	3.81535	0	0	1.27018	0	0.36654	0.558307	5.63358
Phospholipase D signaling pathway	g__Ruminiclostridium	2.12953	0.602841	0	0	12.9265	0	0	2.64388	0	2.86584	3.60924	4.58541	3.08869	4.15457	0	2.30194	0	0.411783	0.675344	0.827788	0	1.70244	2.05219	2.46243	1.24457	0.351875	0.256265	0.513158	1.40042	0.27485	0	8.38159	1.65803	5.497	0	0	0	0	0	0	0	0	0
Phospholipase D signaling pathway	g__Schistosoma	0	0	60.3465	35.6714	0	0	0	0	0	0	0	0	0	0	0	0	0	0	0	0	0	0	0	0	0	0	0	0	0	0	0	0	0	0	0	0	0	464.778	12.0052	0	0	0	66.3348
Phospholipase D signaling pathway	g__Solobacterium	16.6388	4.71022	0	0	7.70926	0	0	3.54778	0	5.8966	146.909	22.6894	55.7225	0	0	43.8628	0.630746	0	0.90623	0.555396	0	2.28447	3.67173	5.94772	27.7231	4.24957	0	0.344298	19.1678	37.6192	2.14924	23.7439	72.0858	11.7475	0	0	0	0	0	0	0	0	0
Phospholipase D signaling pathway	g__Sphaeroforma	1.0247	0.290078	0.463379	0.273908	0	0	0	0	0	0	0	0	0	0	27.8771	0	0	0	0	0	0	0	0.52135	2.09793	0	0	0	0	0	0	0.244612	0	0	0	0	0	0	4.17041	0	0	0	0	0
Phospholipase D signaling pathway	g__Stappia	1.44293	0.408473	0	0	0	12.0948	0	0	17.2037	0	0	0	0	0.808922	2.46472	0	1.22996	0	0	0.224074	8.65248	0	0	0	0	0	0	0	0	0	0	0.609218	0	0	0	0	0	0	0	0	0	0	0
Phospholipase D signaling pathway	g__Trachipleistophora	6.54488	1.85277	0	0	0	0	0	0	0	0	0	0	0.564193	0	0.935562	0	0	0	0	0	0	0	1.68688	0	0	0	0	0	193.16	0	0	0	0	0	0	0	0	0	0	0	0	0	0
Phospholipase D signaling pathway	g__Vibrio	15.3234	4.33786	0	0	68.0109	17.6857	0	14.2639	29.6517	2.53981	18.7201	30.296	0	0.504851	0	113.255	0	25.6219	0.361874	11.4806	0	8.49176	0	0	0	0	6.39473	0	0	86.953	0	14.1332	9.18499	2.15339	0	0	0	0	0	0	0	0	0
Phospholipase D signaling pathway	g__unclassified_f__Nitrososphaeraceae	4.19429	1.18735	0.0152725	0.00902772	0	15.8914	0	0.211997	42.2267	0	0	0.252777	0.302699	0.486282	10.3108	0	1.03943	0	0	0.772641	51.8699	0.761489	0.172112	0.434384	0	0	0	0	0.494081	0.484847	0	0.117157	0	0	0	0	0	0	0	0	0.137453	0	0
Protein export	g__Acetoanaerobium	51.1665	0.806591	0.299095	0.0054718	47.5525	0.509988	0	3.6781	0	18.8328	45.8952	58.8301	23.0528	430.514	26.0648	18.6073	16.0185	231.978	1.64641	0.605416	0	14.2228	24.4482	20.4738	17.0941	2.53489	57.0308	4.84943	45.7941	2.94823	2.33428	258.294	148.197	12.9867	0	0	0.560911	0	0	0	2.13094	0	0
Protein export	g__Akkermansia	16.269	0.256465	57.6559	1.05479	0.257415	0	0	0	0	0.389287	0	5.70368	19.7385	0	0	0.167317	0.975295	0	3.14305	1.21303	0	2.34763	0.842415	0.432888	35.0251	1.32865	0	53.69	357.881	0.570283	2.46365	1.00253	0.237726	0.659419	0.201901	0.191983	129.562	18.4944	0.538479	0	21.8613	0	348.053
Protein export	g__Alistipes	65.5216	1.03289	6.31109	0.115458	22.0459	0	0	42.7568	0	263.403	52.5139	112.85	25.9336	1.50045	6.61455	38.5231	0.96745	20.3745	111.595	65.2503	0	168.026	11.3191	8.85421	15.1005	104.308	6.08672	308.686	43.078	59.7772	125.458	65.2603	232.34	53.0259	0.228783	2.67677	0.203853	2.34935	4.80478	0.246153	0.879494	18.2576	27.153
Protein export	g__Amedibacillus	0.160886	0.00253621	121.831	2.22884	0	0	0	0	0	0	0	0	0	0	4.82657	0	0	0	0	0	0	0	0	0	0	0	0	0	0	0	0	0	0	0	7.86984	602.965	14.1	211.767	1.61469	48.1714	34.0069	172.186	3.79927
Protein export	g__Amedibacterium	98.9433	1.55975	110.955	2.02988	248.99	4.92348	501.757	0	3.12011	56.3382	36.5659	109.32	69.7911	157.565	2.27802	50.5507	284.309	154.994	0.246007	90.3483	0	368.37	252.67	98.6143	1.26063	20.8983	85.3676	3.99769	43.6913	203.313	64.8827	3.43242	36.7191	13.9861	8.19995	353.032	199.605	181.36	1.67165	62.9103	55.5674	92.4695	43.7839
Protein export	g__Anaerorhabdus	120.737	1.90331	181.953	3.32875	41.914	2.68644	0	704.259	0	73.3905	369.273	35.9099	86.0775	567.584	375.323	209.085	39.2584	77.9295	4.4323	8.43583	0.500895	23.7985	12.0757	27.9531	49.9822	8.52669	48.8437	40.8206	82.4064	123.883	3.68361	410.754	157.55	35.7811	10.1135	38.5892	640.577	372.433	0.327435	164.878	375.409	15.4274	19.8261
Protein export	g__Anaerotignum	34.1778	0.53878	31.4013	0.574472	38.0312	0.830338	0	82.0807	0	22.0663	13.937	119.771	8.29631	27.1901	20.9787	51.9371	8.94029	58.2111	17.7454	1.91142	2.3426	3.26024	18.3106	29.6112	9.99345	38.6824	65.212	26.8732	28.1947	8.35166	15.2892	41.4231	39.4399	226.422	29.4338	14.2124	22.4689	0.666587	65.2976	107.61	16.4485	14.428	12.0458
Protein export	g__Anaerotruncus	40.0431	0.631242	74.3267	1.35977	25.0318	10.3809	0	55.9955	0	47.9189	12.0186	74.457	24.9025	3.55669	4.3266	44.3863	8.43558	21.7845	113.506	7.53972	0	4.18729	172.345	19.0066	74.4464	97.3407	5.69721	46.1382	30.9691	1.26444	96.6203	23.4518	59.7131	115.873	15.9149	102.057	57.9243	42.3237	111.14	132.245	76.0304	84.8267	46.4793
Protein export	g__Angelakisella	22.9231	0.361361	76.8842	1.40656	25.702	1.82872	0	12.9409	0	29.9367	19.3853	89.4901	9.47046	1.3476	2.16849	10.0071	5.02241	38.995	64.7497	0.427068	0	7.16578	39.5026	11.7861	16.8172	45.0126	1.34939	46.5731	5.86436	5.80875	59.505	40.6462	60.3064	35.8845	6.3445	111.723	4.48982	83.1173	131.971	38.2097	200.448	92.6306	23.0235
Protein export	g__Bacteroides	163.136	2.57168	59.4458	1.08753	68.1921	1.19274	9.26942	491.814	0	423.474	518.229	260.756	24.6158	5.55083	25.3755	41.3427	1.03385	33.792	107.023	722.018	6.23118	246.513	22.5081	20.7875	24.499	57.5016	5.74958	532.386	51.1028	170.753	73.6068	445.654	132.3	370.808	7.44065	24.4528	5.45601	83.1997	44.3222	95.7529	12.1616	146.924	115.303
Protein export	g__Bilophila	112.83	1.77866	142.085	2.59937	66.3734	0	0	138.501	0.553111	138.207	43.2197	78.0092	581.18	1.75238	0	50.9916	42.8591	15.4085	328.362	167.178	1.45389	29.6476	31.7933	202.522	247.858	340.6	18.5848	138.26	94.6176	35.1702	233.364	70.4638	180.527	107.452	43.733	136.146	248.209	92.5845	176.682	191.322	95.316	48.8652	245.904
Protein export	g__Breznakia	900.485	14.1953	14.4462	0.264287	2047.99	62.9025	4887.38	2.2438	83.7782	474.054	384.754	771.013	451.784	2158.41	4.7811	862.004	2131.18	2084.33	3.79229	680.014	0.800389	2861.35	1858.09	646.429	12.64	193.95	838.346	37.6466	376.445	1510.22	412.298	132.364	776.962	266.605	34.6935	0.195103	42.787	0	0	0	26.6462	4.23138	21.4628
Protein export	g__Candidatus_Avidesulfovibrio	61.4846	0.969246	47.5454	0.86982	35.4751	0	0	94.1037	0	57.2413	25.6815	45.7819	299.319	1.18395	0.362459	29.2879	29.4949	3.30713	176.091	101.275	0	16.3839	10.555	109.651	139.508	205.967	8.39575	40.955	60.2208	18.2545	130.699	46.2562	102.376	56.7086	5.30228	61.1508	126.388	68.5271	3.38916	3.40844	53.4318	4.45628	101.855
Protein export	g__Candidatus_Faecisoma	54.3471	0.856731	0.622267	0.0113841	58.0171	0	0	318.208	0	108.335	18.9662	179.91	51.8658	27.2663	0.848895	21.3755	12.964	56.7811	8.98338	152.478	0	19.752	5.33411	97.3737	37.1208	36.8621	42.8484	24.3973	25.2964	0.218488	5.04618	218.941	3.0898	98.1341	0	1.06095	0	4.53945	0	0	0	0	0
Protein export	g__Candidatus_Fimihabitans	59.1195	0.931963	4.28747	0.0784371	95.2322	0.364876	0	595.715	0	162.564	49.6122	86.1657	43.6305	33.3281	0	28.8031	4.84626	40.754	4.80894	144.013	0	21.5451	0	5.72083	22.5873	15.9645	59.1161	31.9282	20.9482	0.204995	2.80352	199.331	1.00216	102.597	0	0	0	19.5101	0	0	3.31826	0	15.7588
Protein export	g__Christensenella	182.994	2.88472	39.7449	0.727113	48.1482	0.169738	0	18.8959	0	63.3685	68.2544	170.728	420.7	11.6858	4.17098	48.5378	42.7274	54.3303	138.408	10.371	0	30.0115	116.147	1338.61	927.878	749.614	88.022	39.3706	205.984	9.85356	380.476	122.576	41.4194	339.355	22.6874	5.24217	61.6422	60.1715	7.81918	86.6673	30.8554	12.0374	70.5812
Protein export	g__Clostridium	434.206	6.84485	368.498	6.74149	651.144	444.457	5.17623	426.398	0.289725	270.634	654.5	928.057	709.53	103.188	135.258	722.523	1566.58	310.438	241.454	212.697	47.0414	292.826	129.841	626.876	1075.24	491.29	166.261	459.915	472.983	9.34037	207.788	564.737	520.358	579.351	419.713	352.866	286.45	530.581	406.114	336.124	510.396	204.761	269.474
Protein export	g__Coprobacillus	59.7831	0.942424	34.8622	0.637787	17.0395	0	0	111.716	0	59.5816	318.075	11.9519	16.9892	373.127	0	285.286	0	31.2727	1.86132	275.954	0	8.59274	4.90933	11.6925	2.23202	1.6865	0.124178	4.63605	12.8573	17.8617	3.32562	83.4601	42.2713	96.9896	10.0912	35.2579	0.257284	91.5091	1.92943	31.3639	95.4606	21.8663	26.0238
Protein export	g__Desulfovibrio	169.842	2.6774	188.633	3.45095	107.245	0	0	99.9213	0	1022.69	65.6839	139.981	231.264	0.827875	3.67789	45.1585	122.232	22.6248	714.087	134.753	0.877138	65.359	242.765	200.737	310.318	169.952	15.7866	255.172	94.3772	26.7213	396.604	131.515	260.794	214.13	159.916	182.082	65.028	58.2186	55.6499	106.889	45.0156	650.44	374.455
Protein export	g__Dielma	82.1859	1.29558	2.76216	0.0505323	178.986	8.56045	394.07	3.11412	7.53464	49.1185	40.3862	68.1968	47.1458	191.92	2.8694	83.0496	207.776	190.87	2.66521	61.5644	0	263.145	153.726	56.9807	9.50868	20.0669	80.0347	5.59298	29.8955	145.185	36.4005	20.0763	74.8683	32.269	0.761091	3.37172	5.91763	1.61714	1.17946	3.69771	3.75061	0.518428	4.04561
Protein export	g__Dorea	11.4377	0.180305	51.2091	0.936846	10.6506	0.898319	0	9.89072	1.25448	4.98083	8.26663	17.5025	14.6162	14.6933	26.1964	20.9423	5.31169	10.6931	7.47476	1.72901	10.5916	2.75549	3.09515	14.7217	9.94628	3.04891	4.10881	7.16346	29.6541	2.05561	5.18032	29.7121	7.2322	58.7652	7.97793	11.8534	131.052	113.663	46.0986	47.187	30.4006	53.1394	19.5097
Protein export	g__Eubacterium	23.9374	0.37735	33.9679	0.621426	27.2288	0	0	52.5818	0	21.9967	4.37869	30.9902	21.7158	9.52732	2.20958	16.5005	0.467072	9.71393	42.1942	19.6973	2.97819	8.0298	19.5233	55.6505	20.9398	58.1056	16.5186	21.3537	103.878	1.66	20.514	25.3345	6.84866	97.5843	7.32141	4.39712	18.7401	49.2684	32.1956	44.4725	48.0025	88.2013	13.1121
Protein export	g__Extibacter	14.1979	0.223816	42.378	0.775284	15.2564	0	0	24.7012	0	7.96583	14.5685	28.7676	6.01336	27.211	66.8069	63.2038	11.7957	3.18273	4.60788	6.05389	15.1351	0	5.6885	12.1059	12.6767	3.44877	0.86826	5.50612	12.1359	1.60856	5.85781	21.1104	4.77862	44.8802	32.1678	13.7826	37.0002	138.091	31.0489	45.5277	46.0485	31.6039	6.13072
Protein export	g__Faecalicatena	38.0793	0.600284	80.3663	1.47026	24.2062	0	0	12.3384	0	5.67967	182.829	88.2175	67.2697	15.8884	16.6891	76.9375	6.92877	9.32114	2.38574	1.40976	0.514306	12.9523	16.102	19.5139	65.7481	12.0902	2.33851	17.0124	27.6778	52.539	8.0689	155.4	125.852	116.468	32.4589	43.5513	50.5618	86.9817	218.238	136.259	50.7245	78.2283	26.2937
Protein export	g__Holdemania	62.0495	0.978151	14.2771	0.261193	24.5564	0	0	13.3192	0	9.98874	485.5	86.1235	203.405	0.878405	17.9703	169.757	11.1652	0.997509	6.82916	2.72908	0	32.1993	20.9455	16.1892	115.093	23.5326	0.777175	7.80211	91.027	120.872	14.7418	122.102	226.077	36.9066	4.93607	12.7925	12.7294	15.4112	1.36212	18.634	24.774	13.2358	24.619
Protein export	g__Hydrogenoanaerobacterium	12.9344	0.203899	88.9708	1.62768	15.6696	1.26953	0	26.145	0	23.5246	9.58325	28.9108	13.161	1.38987	1.54045	9.28448	0.715365	8.61005	33.0654	4.74324	0	4.54452	17.796	11.6539	20.8325	32.0138	3.70347	19.9205	17.9136	0.588563	23.9286	8.78057	27.2529	21.4909	16.5223	56.4119	180.223	85.0493	47.141	142.494	115.894	52.6848	104.316
Protein export	g__Intestinimonas	13.4098	0.211392	41.3141	0.755822	17.0237	0	0	15.0103	0	23.0011	34.3217	21.1388	9.85608	0.622987	0.967395	28.5147	3.36274	1.94986	11.9576	8.90318	0	5.02197	5.7611	9.72171	28.4521	40.9593	0.731933	13.8099	32.3157	6.7968	22.413	17.2595	27.0341	15.3857	1.21924	45.8688	17.9263	19.0714	100.097	17.2849	40.0671	38.3032	91.9891
Protein export	g__Kineothrix	24.4054	0.384728	196.367	3.59244	27.8242	0	0	40.3188	0	8.17654	1.83285	48.9089	7.75605	14.4261	4.8954	11.7707	1.19939	8.87808	95.6681	36.7865	0	7.73187	70.6	8.38451	17.5391	45.3874	6.35165	34.5811	51.1217	0	57.0595	36.6984	6.58331	81.6808	75.6158	135.619	12.5566	43.5281	536.742	351.442	93.1626	188.394	330.241
Protein export	g__Lachnoclostridium	17.6229	0.277809	128.056	2.34272	18.3891	0	0	30.7567	0	8.56369	4.19437	21.402	23.4802	10.8522	17.2595	6.54732	0.37042	1.36692	17.8371	19.6112	0	5.30046	6.96417	9.72067	8.73083	13.7858	2.73595	25.2896	51.3268	2.13635	8.75538	34.6912	6.3694	172.251	15.6767	43.5271	114.397	196.674	237.146	70.648	202.981	125.588	145.866
Protein export	g__Ligaoa	4.76901	0.0751789	76.3966	1.39764	7.9363	0	0	15.0393	0	8.60889	4.66292	13.6597	2.30909	1.36588	0	3.29107	0.635036	5.23427	17.8108	3.43083	1.21195	0	5.38942	4.21245	5.13562	1.21409	3.06528	3.30141	5.25936	0.86177	1.77556	1.29972	16.3039	10.0556	10.2575	33.4351	216.216	93.1395	25.4912	145.511	59.3491	29.2263	74.9433
Protein export	g__Longicatena	99.9873	1.5762	39.8443	0.728931	206.021	6.60699	427.224	16.2734	13.9566	57.379	89.5816	82.8846	43.5845	294.669	0	124.41	217.553	245.269	1.1313	122.949	0	272.072	173.455	69.981	0.732742	19.3969	84.8863	4.65004	31.495	155.375	35.5385	39.9652	111.166	51.4112	39.8057	108.152	32.0539	40.7419	9.24841	41.2542	48.8983	16.9237	21.5201
Protein export	g__Mailhella	42.1362	0.664237	27.2336	0.498226	20.9883	0	0	51.595	0	50.9756	12.3999	19.0063	26.6293	2.49154	1.08959	25.3336	37.1724	10.0116	127.34	153.059	2.84583	6.41992	32.7677	134.079	111.443	84.8449	18.9529	42.4028	9.44594	0.672392	160.314	16.9808	28.1824	76.6407	10.4806	17.017	2.82961	6.31603	1.8391	3.78739	37.549	13.4309	151.853
Protein export	g__Methanobrevibacter	15.9532	0.251487	440.701	8.06242	0	0	0	0	0	0	0	0	0	0	0	0	0	0	0	0	0	0	478.596	0	0	0	0	0	0	0	0	0	0	0	3087.75	513.73	0	0	0	0	44.9869	303.878	15.9696
Protein export	g__Methyloceanibacter	92.7702	1.46243	1.71613	0.0313958	2.85048	912.987	19.8512	6.05831	705.285	0.356846	6.22384	6.66253	13.25	14.4103	441.234	9.40511	36.376	6.13165	7.02385	13.8101	477.754	29.4165	6.9843	16.7691	3.39188	13.2104	1.22154	0.815526	9.68905	7.44631	0	5.56444	8.17739	0.748391	0	0	8.6484	1.22729	0.168877	0.412784	0.47387	4.30373	0.210249
Protein export	g__Mucinivorans	47.3818	0.74693	13.1984	0.241458	13.798	0	0	22.6275	0	121.835	57.423	81.0562	17.7594	0.96634	6.94858	32.1371	1.17582	8.60345	289.518	33.9404	0.899734	101.374	6.56188	12.5364	13.9566	86.2488	3.39107	182.064	26.4334	15.1284	130.905	31.6993	102.123	20.3441	0	0.803593	0	0.463693	0.0598275	0	1.61762	1.22261	114.618
Protein export	g__Mucispirillum	13.2	0.208085	51.246	0.937521	6.06569	0	0	1.65834	0	27.0584	0.794215	38.5764	0	1.42251	0	7.85502	3.67609	23.4396	0	4.22469	0	24.5621	84.8175	0.454826	0	24.38	2.32585	36.2933	35.9516	39.3234	6.11748	1.88596	20.9128	4.20329	37.7359	9.73094	0	2.40342	22.9781	0	1.01381	387.011	0.340635
Protein export	g__Mycobacterium	61.7653	0.973672	1.49348	0.0273225	3.23575	617.067	77.4987	1.04921	411.826	0	15.2554	9.41332	28.9555	21.8208	239.653	11.5473	60.6852	1.90886	12.2005	16.5425	192.487	50.6993	7.09237	22.7987	3.12763	8.99544	0	0	12.5424	10.6088	0.293762	10.2828	4.15689	1.21565	0	0	1.97456	1.4543	0.214757	2.28387	0.65766	6.3912	0.464994
Protein export	g__Nocardioides	22.5012	0.35471	36.6445	0.670393	4.39844	31.8821	207.652	7.83822	102.937	0	0.405611	0.615233	2.64831	0.445851	32.8963	1.01557	36.744	118.617	0.546556	0.708505	104.832	13.7395	1.22741	0.548007	0	0	0.419101	0	2.16171	1.20436	0	0.282686	1.27103	0	1.18099	0.427173	144.483	14.3978	6.88216	18.96	18.5584	112.196	12.7154
Protein export	g__Paludihabitans	33.5185	0.528388	61.5667	1.12633	18.9794	0	0	5.84529	0	20.3675	6.95444	43.5325	43.4756	0.873848	1.82211	4.18535	0	6.81213	101.01	4.05878	0	4.9348	28.6987	24.8202	102.438	308.649	0.51762	60.042	96.9481	1.53936	79.8931	11.3646	7.20253	20.5914	0.155308	89.6545	2.83829	24.4686	133.617	37.4086	167.414	34.1775	64.3665
Protein export	g__Parabacteroides	32.6119	0.514096	55.0425	1.00698	8.77416	0	0	7.10447	0	84.4751	9.51736	23.4538	1.50281	0.479857	3.42786	7.10747	0.332883	11.6155	44.492	34.6491	0	107.876	21.4498	25.1633	10.2489	26.2434	0.740612	35.3767	8.93421	331.312	42.0424	40.4438	79.0765	12.5186	0	0	2.54478	334.598	0.704098	10.7122	1.55206	97.2475	48.0236
Protein export	g__Proteocatella	59.6011	0.939554	0	0	48.4078	1.75429	0	4.65815	0	18.4179	48.2503	54.3265	22.6559	574.272	37.9273	9.63251	8.36901	280.724	0	0	0	11.1412	20.0993	25.743	19.797	0.854737	65.3305	4.35409	45.4707	0	1.43872	310.799	167.975	5.63304	0	0	0	0	0	0	0	0	0
Protein export	g__Pseudoflavonifractor	8.82813	0.139167	54.76	1.00181	8.54196	0	0	8.06836	0	19.0219	46.7639	7.71339	7.72373	0	0	30.5319	0.409985	0	22.9964	9.53147	0	1.19858	1.2882	1.92212	4.51176	35.6584	0.315558	4.48883	11.2893	1.24141	2.86088	4.41165	23.608	10.7461	0.347181	141.69	9.73061	159.387	19.9589	3.16	66.1401	72.4819	19.9448
Protein export	g__Rikenella	50.8433	0.801496	3.28451	0.0600885	12.4451	0.153766	0	28.8266	0	157.803	69.2526	82.1495	20.5588	1.15511	1.61685	42.4701	2.08628	17.506	222.049	48.8941	0	94.8762	10.1161	13.947	14.7292	90.216	5.035	234.289	27.3466	23.777	139.195	41.8045	98.0628	24.9371	0	0	0	0.118433	0	0	1.59748	0.259593	27.5851
Protein export	g__Ruminococcus	46.6466	0.73534	52.9933	0.969487	42.8485	0.753003	0	32.1549	0	50.3601	45.2955	78.89	68.7685	8.92787	6.33987	46.3126	22.129	23.5928	21.2497	37.2057	2.35697	7.08331	19.7855	88.8181	96.902	106.728	18.7867	36.1518	191.058	5.56233	36.1163	93.1318	103.786	108.303	19.2228	40.4206	50.1151	60.1606	143.656	29.488	28.3004	62.9185	42.6571
Protein export	g__Ruthenibacterium	91.1367	1.43668	124.93	2.28554	45.3261	26.5885	0	38.1653	0	38.0189	32.2961	110.535	129.321	65.6578	37.7587	176.886	96.2736	179.076	459.376	70.1022	7.12393	46.7687	39.4072	161.438	121.852	267.066	36.6625	31.0898	90.6798	4.35969	75.3176	114.833	83.134	148.986	18.5486	74.5186	220.333	128.078	77.108	84.5877	211.432	116.421	193.346
Protein export	g__Thomasclavelia	10.436	0.164514	75.5801	1.3827	21.5121	0	0	137.776	0	30.9716	0	17.1277	2.35142	0	0	5.35357	0	1.66788	0.320012	20.973	0	2.13826	0	0.0903275	0.0494678	1.32416	12.5106	9.90827	5.86592	0.345211	1.50876	27.3591	1.66598	12.2615	0.810269	143.563	267.256	62.1313	26.499	24.3559	101.701	51.2593	2.64495
Protein export	g__Vibrio	66.2832	1.04489	0	0	285.119	37.3447	0	54.7069	239.045	8.77373	72.2443	128.018	1.2465	1.0432	0	434.501	0	132.632	2.93049	57.9039	0	32.7562	0.528852	0.0850609	0	0	20.7598	0.25679	4.43177	376.047	1.02533	60.3011	25.9838	10.8126	0	0	0	0	0	0	0	0	0
Protein export	g__unclassified_f__Erysipelotrichaceae	3.50669	0.0552797	65.8952	1.20552	11.0695	0	0	0	0	0.535639	9.2193	19.0107	9.09809	0.256995	2.14773	1.74136	0	0	0.44738	3.39765	0	17.5006	0	17.0148	0.23829	0.801095	0.490654	4.05496	1.00079	0	0.337985	1.29107	0	5.54623	29.5687	209.845	67.8327	94.4557	3.89436	39.3869	52.352	70.3976	25.3239
Protein export	g__unclassified_f__Nitrososphaeraceae	52.6529	0.830024	28.3289	0.518263	0.767683	201.68	8.87064	0	597.113	1.13319	0.813603	3.69431	0.191065	6.57844	210.009	4.43846	22.2988	2.99322	3.00677	9.97561	405.407	73.3041	0.752701	1.06388	0.166296	0.889184	0.647588	0	10.6375	7.43352	0	2.07828	2.57515	1.06936	3.98205	0	156.4	25.1846	9.64345	8.02107	29.3733	17.4473	4.90782
Protein export	g__unclassified_p__Bacillota	29.7592	0.469125	384.991	7.04323	0	0	0	0	0	0	0	0	0	0	0	0	0	0	0	0	0	0	892.775	0	0	0	0	0	0	0	0	0	0	0	2815.31	308.115	0	0	0	0	37.5145	243.449	60.5274
Pyrimidine metabolism	g__Alistipes	217.23	1.40803	16.8383	0.12844	62.0476	30.7815	0	169.697	0	808.744	220.696	336.673	58.6034	26.9343	31.6243	138.642	8.32661	69.3723	519.228	239.965	11.658	449.989	46.541	42.8648	54.2007	337.933	18.9337	870.52	137.219	163.57	421.54	240.434	822.995	177.178	0.728397	7.07071	4.83239	7.17135	18.8788	5.92585	16.6448	23.1438	67.1484
Pyrimidine metabolism	g__Amedibacillus	505.669	3.27761	216.122	1.64855	1177.43	19.2586	2638.34	1.79048	53.169	278.986	213.069	439.54	278.4	978.189	13.4922	416.14	1309.35	1019.23	3.99921	396.83	0	1688.93	1099.31	416.618	12.3278	119.801	490.015	24.1196	229.273	963.13	260.375	80.29	398.009	150.635	69.7101	887.255	97.966	315.164	6.83135	123.37	127.489	278.867	38.4402
Pyrimidine metabolism	g__Amedibacterium	108.928	0.706039	102.462	0.781568	190.229	5.90818	400.338	5.82776	9.36034	53.0825	185.511	95.4865	108.243	217.312	2.40152	157.105	212.827	233.529	2.5118	71.558	0	272.519	162.207	127.862	37.0068	23.282	84.0607	5.38539	74.4155	174.036	40.8666	61.7031	202.317	50.9376	65.5459	260.389	103.397	183.589	8.1844	102.658	91.1231	67.1968	40.0741
Pyrimidine metabolism	g__Anaerorhabdus	575.378	3.72945	771.445	5.88449	183.38	7.87167	0	2952.49	0	348.214	2127.67	278.148	544.439	2463.21	1336.99	1066.18	185.19	326.617	36.4966	43.1648	11.486	107.297	102.904	163.587	358.842	71.5755	213.244	179.871	436.66	681.441	36.877	1852.83	941.698	202.972	31.0223	148.855	2874.58	1562.99	17.7264	683.876	1460.35	56.8871	106.719
Pyrimidine metabolism	g__Anaerotignum	90.5879	0.587167	61.6977	0.470622	100.335	4.12383	0	181.916	0	52.6578	64.5323	311.409	66.3432	65.4421	43.8329	118.65	15.5277	171.636	66.7397	7.72426	12.8975	14.5799	56.4187	44.057	66.302	143.41	134.395	85.8281	56.3419	26.431	72.8344	111.71	105.608	515.953	34.0038	10.1543	34.0823	23.0828	139.31	134.315	55.2205	67.9838	57.1265
Pyrimidine metabolism	g__Anaerotruncus	141.979	0.920268	229.701	1.75213	76.151	34.8039	0	159.533	0	132.655	48.3345	252.914	67.6561	10.6766	36.3425	150.079	65.1955	153.785	380.106	24.2905	13.4496	19.994	579.193	106.775	288.257	335.226	27.7777	145.8	65.2948	4.14311	363.968	108.366	213.571	395.025	35.5458	242.943	228.981	139.316	269.562	335.57	381.994	255.345	178.054
Pyrimidine metabolism	g__Angelakisella	44.0543	0.285548	128.473	0.979979	45.0701	2.22041	0	31.1455	0	52.7279	35.1077	122.03	22.4936	7.83963	9.95788	31.1915	34.9833	68.005	119.599	2.58182	0	7.12181	79.1367	39.4202	64.2796	110.33	7.38709	69.152	26.052	6.53502	90.069	86.0647	94.1046	57.0224	13.6414	186.464	23.2628	135.15	211.319	90.3353	319.24	126.726	50.1229
Pyrimidine metabolism	g__Bacteroides	229.473	1.48738	209.643	1.59913	97.1541	2.09138	0	707.025	6.06257	628.376	737.305	377.388	28.3527	9.15657	50.7036	61.5801	1.32191	37.2208	116.136	1016.97	9.04274	321.86	18.3244	27.0436	31.3153	69.7356	8.96718	843.936	68.3493	159.322	75.6427	665.575	70.233	637.996	0.216322	29.1302	87.4334	714.341	9.65459	106.927	12.2509	281.88	644.954
Pyrimidine metabolism	g__Bilophila	216.222	1.4015	270.906	2.06644	115.384	0	0	247.615	0	466.027	88.6738	138.029	979.274	3.98063	0.770465	79.379	98.7291	15.6691	633.019	322.551	2.69298	48.0785	110.455	411.7	484.72	584.221	16.3094	226.824	203.255	51.5709	499.053	134.342	324.45	199.9	96.2106	280.498	417.078	157.043	335.421	384.517	197.492	170.258	399.638
Pyrimidine metabolism	g__Blautia	33.5575	0.217511	96.0147	0.732388	26.451	1.40075	0	33.8771	0	22.0224	20.3673	34.3496	22.9039	73.3744	16.9101	36.3483	6.2204	40.2297	71.7921	20.0907	0	7.69058	8.06906	20.7891	23.1297	40.6868	11.6509	35.1896	53.4705	2.89253	23.3699	68.693	33.5972	251.16	10.9368	53.0426	64.9305	91.1416	220.423	120.244	114.884	69.5325	118.997
Pyrimidine metabolism	g__Breznakia	1057.49	6.85435	23.9346	0.18257	2465.99	82.8665	5537.32	1.79921	73.0374	569.735	420.961	936.068	577.071	2259.47	9.95944	834.893	2732.96	2257.53	6.67733	811.701	1.85597	3618.29	2272.13	833.632	10.7813	244.038	1012.13	41.9082	491.953	1877.98	547.118	126.758	823.434	244.572	49.1972	78.4461	28.1357	22.5121	0	0	17.9534	0.315565	18.8511
Pyrimidine metabolism	g__Candidatus_Avidesulfovibrio	137.833	0.893399	49.8398	0.380172	85.5887	0	0	183.431	0.993342	118.928	59.6815	113.398	781.027	3.93627	3.52521	54.8577	85.2836	5.84929	438.358	192.877	1.50661	28.6757	22.1037	257.353	272.491	410.208	16.8479	89.0842	109.29	58.0368	262.365	86.4934	253.324	139.485	5.09307	59.373	139.635	56.0693	6.2708	0.99713	64.108	3.11875	113.893
Pyrimidine metabolism	g__Candidatus_Stoquefichus	77.8996	0.504924	58.9214	0.449445	8.63977	0	0	155.246	0	83.3932	431.467	20.3621	20.8267	486.902	0	303.581	0	34.5604	2.02935	388.419	0	1.34991	7.88934	21.0541	1.87366	0.538986	0.2032	10.6652	14.9382	29.9152	1.88326	123.486	63.6889	124.074	10.2938	66.993	1.35878	177.433	8.73258	50.1111	133.443	32.3702	49.5572
Pyrimidine metabolism	g__Cetobacterium	142.997	0.926867	6.49202	0.0495203	986.942	0	0	1.37875	0.921852	1.05248	2.00098	31.7768	331.605	0.189668	2.22231	1.49451	46.483	42.3852	166.98	0.196913	3.53049	57.2913	18.8923	32.8054	142.181	385.724	0.129786	1821.26	63.2039	60.5648	81.5307	2.15296	4.64072	0.370318	0.409873	6.71272	0.678998	0.464098	6.09136	0.86684	24.3643	14.9798	3.86012
Pyrimidine metabolism	g__Christensenella	226.834	1.47028	85.7846	0.654354	43.8431	0.743887	1.4507	25.4092	0	78.3846	60.808	180.73	473.98	6.77539	23.5842	39.1409	61.136	49.8928	250.806	13.8257	1.72281	41.3528	147.076	1510.81	1153.56	1111.51	77.9276	64.7436	317.781	33.0761	470.103	190.933	53.3809	320.516	39.7298	27.963	135.553	112.023	34.5556	187.227	55.9783	31.088	147.943
Pyrimidine metabolism	g__Clostridium	1327.39	8.60376	793.659	6.05393	1925.74	2568.71	427	2508.54	13.4446	1035.5	1466.92	2131.24	2031.7	1200.14	2509.17	2189	3440.86	943.807	714.305	848.143	292.637	972.961	461.894	1220.44	2348.54	846.91	653.427	1114.08	1080.44	198.024	485.201	1628.84	1181.8	1382.15	139.4	1396.1	484.469	1109.13	844.553	856.146	1118.37	600.987	593.774
Pyrimidine metabolism	g__Copranaerobaculum	55.9282	0.362512	71.078	0.542174	116.985	4.20106	303.547	0.157889	4.91947	28.4426	18.8902	49.8754	44.487	110.146	1.33352	31.3832	140.181	91.0174	1.61301	46.8113	0	216.114	117.784	84.7887	3.17904	14.2428	45.4136	6.74512	29.9388	96.7403	32.023	7.51778	16.1193	13.2482	18.7572	128.843	32.2165	37.0948	6.80509	236.637	155.904	6.21312	17.2308
Pyrimidine metabolism	g__Coprobacillus	63.2111	0.409718	90.9297	0.6936	9.24971	0	0	130.665	0	59.4547	328.67	19.2586	40.0376	399.885	5.6157	242.389	0	30.2263	2.35138	312.614	0	1.31666	1.85237	14.1547	3.08305	6.01211	0.479783	8.27968	21.1293	21.6516	1.87483	91.3628	54.4588	90.2608	5.43057	115.804	117.537	191.578	15.7904	62.3285	203.111	57.7434	49.0433
Pyrimidine metabolism	g__Desulfovibrio	205.33	1.33089	266.985	2.03653	138.627	0.582868	0	104.176	6.91051	1200.22	70.9387	195.473	247.264	2.23211	2.78551	58.9916	156.596	38.654	943.234	141.453	1.98034	88.7858	323.857	259.593	333.829	154.204	14.1978	349.646	85.7917	23.3252	487.409	177.498	296.759	254.874	228.025	238.692	86.5775	58.501	109.102	218.586	72.2612	810.758	580.361
Pyrimidine metabolism	g__Dielma	117.263	0.760067	9.09084	0.0693438	264.407	7.2167	637.102	1.98088	11.4334	58.8206	48.4648	103.733	58.5155	237.138	0.965904	87.2183	299.647	235.905	17.2628	80.0782	0	435.787	253.832	85.8052	2.56328	24.793	100.158	3.62391	51.9082	201.804	53.3818	21.6377	97.1819	35.5212	6.93967	19.8176	9.17287	10.235	1.23256	6.09284	15.6331	4.03134	8.66263
Pyrimidine metabolism	g__Dorea	47.0744	0.305124	123.994	0.945808	39.4298	2.71429	0	57.5376	0	22.0412	42.357	72.8123	36.4418	70.8908	154.105	162.849	26.0589	80.729	18.863	9.3972	15.7239	3.05834	20.3403	42.6139	39.317	27.1991	16.2363	29.4171	81.8734	12.7433	19.9205	110.011	89.1507	108.4	44.619	30.7655	175.047	244.215	190.985	116.328	98.604	169.142	46.2376
Pyrimidine metabolism	g__Duncaniella	198.868	1.28901	0.427483	0.00326079	3.34068	103.546	0	1.30781	10.8164	86.5553	581.481	72.0253	1.23863	136.557	0	6.42104	2.73323	20.2444	1.55925	688.803	3631.27	475.809	0	0	0.191567	2.22248	107.29	2.04204	2.77991	2.18164	0.616325	1.93236	2.95472	20.1255	0	0	0	0	0	0.111715	0	3.6079	0.127738
Pyrimidine metabolism	g__Eubacterium	234.654	1.52097	176.436	1.34583	106.334	75.0338	0	145.685	4.15803	152.749	664.869	184.65	162.063	125.427	6.42651	67.9997	12.2375	30.0197	107.317	675.54	2568.54	352.973	46.9245	159.498	96.6199	223.658	106.453	102.002	325.228	37.5714	42.4718	103.359	86.2416	267.581	49.8208	106.594	66.8439	209.807	394.168	300.93	132.509	204.817	122.435
Pyrimidine metabolism	g__Faecalicatena	135.162	0.876082	118.245	0.901956	256.486	4.08544	655.532	8.48475	5.17806	55.8133	83.6094	179.779	60.366	275.15	20.7381	82.3596	271.051	185.574	16.1671	83.2374	2.04355	391.299	232.584	95.8814	57.7032	28.9167	95.7879	28.2232	64.8389	194.262	54.794	226.692	79.3951	258.816	38.0218	86.6598	68.2734	134.772	335.864	197.023	64.6764	86.3369	52.5734
Pyrimidine metabolism	g__Holdemania	106.22	0.688492	22.4345	0.171128	40.4952	0	0	23.7323	0	14.5214	796.801	151.224	355.398	0.594423	27.2412	270.624	17.3526	4.51975	13.7229	7.05434	0	45.9843	33.7688	40.6351	191.594	50.7778	2.70082	13.9637	147.717	202.605	24.4643	204.086	431.798	73.2353	5.56015	15.0032	18.5269	30.4955	8.35081	24.9801	49.8447	14.7042	34.4453
Pyrimidine metabolism	g__Hungatella	17.7728	0.115199	187.204	1.42797	19.7656	0	0	22.2848	0	10.3888	4.9733	23.7052	7.29591	3.77709	0	6.28964	2.12341	2.72928	11.9097	21.1317	0	4.61606	11.5252	3.64851	11.7788	23.5378	1.73322	25.9304	13.0106	1.85451	44.8881	15.5341	12.206	226.547	28.9931	80.9118	147.812	325.524	315.833	211.929	418.267	78.9255	76.6377
Pyrimidine metabolism	g__Hydrogenoanaerobacterium	37.783	0.244899	192.556	1.46879	47.1014	0.858171	0	64.7001	0	54.4424	29.4211	71.7291	23.5653	9.90491	11.7986	25.1952	23.3151	32.9147	92.3403	9.30546	9.33556	21.0015	43.2979	34.4458	58.2654	115.393	7.6688	55.6789	50.5719	6.88195	59.3864	42.3493	79.041	53.58	31.257	101.263	389.593	234.745	101.768	368.048	219.896	77.3412	209.088
Pyrimidine metabolism	g__Intestinimonas	27.4236	0.177752	112.044	0.854657	19.7942	0	0	21.6931	1.43158	33.0898	55.7499	44.9887	29.4664	0.935267	19.4041	56.7704	6.22647	6.1365	33.2766	20.9913	2.43156	8.29834	18.4635	16.1574	79.0911	111.027	8.16246	18.0916	51.126	8.2733	60.2236	25.6003	40.1952	25.6127	3.39603	138.397	73.8448	91.8276	187.148	53.614	96.7862	119.519	243.862
Pyrimidine metabolism	g__Kineothrix	35.6843	0.231296	304.798	2.32496	38.5389	0	0	66.607	0	12.5386	1.99193	59.6694	5.72313	28.6734	3.28235	18.9848	4.32503	16.0949	165.071	56.7173	3.0779	6.07189	95.6998	12.295	26.2962	64.2293	7.14307	52.1142	58.7972	0	99.6893	49.9717	9.26196	107.664	115.095	252.705	23.9891	76.4663	756.722	620.748	81.2727	249.645	566.539
Pyrimidine metabolism	g__Lachnoclostridium	49.6515	0.321828	370.239	2.82414	41.3938	0.812671	0	40.2016	0	24.3463	24.1275	81.5362	181.56	44.4921	195.624	77.507	22.9377	14.2226	62.1078	5.58822	17.1625	5.26578	27.8315	35.6536	89.6759	45.5069	6.61286	63.8481	81.54	7.71094	42.1694	116.28	41.2183	92.6131	79.8947	118.442	414.123	707.233	658.194	284.848	493.37	263.276	312.771
Pyrimidine metabolism	g__Longicatena	185.254	1.20077	175.836	1.34126	455.163	12.7508	1016.82	0	10.1581	103.082	73.536	179.807	94.5086	381.435	16.2337	125.493	455.591	342.47	2.90889	145.857	1.73057	679.77	376.585	185.267	4.56391	42.4066	176.474	8.45057	80.1097	330.002	87.347	22.2334	113.556	33.3199	139.358	600.943	73.6319	212.256	20.0407	152.695	152.041	175.641	55.9212
Pyrimidine metabolism	g__Methanobrevibacter	86.4652	0.560444	1105.7	8.43413	15.5477	1.63853	6.31633	3.55064	0.65159	11.0313	1.7272	6.61955	17.1776	6.53013	0	20.3581	7.73514	2.78789	4.02898	44.1954	26.3802	2.0863	2283.3	13.7047	26.0728	6.00842	17.9883	2.01069	3.24049	0	2.05668	25.9403	10.9736	24.2952	7742.49	1254.57	4.49579	3.35269	2.14886	4.80374	102.689	742.902	93.8358
Pyrimidine metabolism	g__Methyloceanibacter	152.649	0.989432	3.74347	0.0285547	7.63851	1679.85	25.1503	4.21626	1261.41	1.43476	13.8604	12.199	24.9537	37.5474	618.534	17.689	77.5034	14.4718	10.5606	18.1299	621.014	27.0785	7.9891	23.2163	4.05364	9.42047	2.14664	0	18.7265	16.4558	0.653722	11.2769	10.0934	2.20777	0.585577	0	21.5126	1.91872	0.495372	1.19324	1.37077	5.11976	1.49516
Pyrimidine metabolism	g__Mucinivorans	100.208	0.649525	37.8871	0.288998	29.933	0	0	60.1527	0	286.097	145.214	161.53	29.4155	2.50289	8.29661	78.8324	0.133449	13.3553	580.744	84.8798	1.93059	239.256	9.38578	28.874	26.6991	186.107	7.14511	426.285	72.7485	37.8126	258.528	51.9938	136.7	41.7028	0	0.123869	0.663801	1.06659	0.380479	0	2.90372	2.16058	333.685
Pyrimidine metabolism	g__Mucispirillum	28.8448	0.186964	112.466	0.857878	13.7375	0	0	4.02242	0	64.7754	1.8068	85.3558	0	4.05804	0	15.9042	15.1956	64.3668	0	14.3109	0	27.4328	211.883	0	0	76.5709	8.202	69.0844	74.3908	37.3237	6.42678	8.85102	45.9496	15.6957	51.9295	14.4174	0	6.29349	27.2962	0	0.633817	910.659	0.965323
Pyrimidine metabolism	g__Nitratidesulfovibrio	99.9485	0.64784	54.4043	0.41499	66.0795	0.621913	0	82.4744	0	447.122	35.0763	73.2948	189.618	1.12637	5.39373	37.2787	77.0478	9.79097	381.531	87.3675	0	40.8501	120.897	150.421	199.357	166.741	9.11545	134.491	70.9701	14.9823	248.989	71.3648	147.156	129.3	39.0644	82.104	45.8911	22.7144	31.745	23.3062	19.5189	105.015	120.28
Pyrimidine metabolism	g__Nocardioides	51.2045	0.331894	91.0314	0.694376	8.68115	85.6954	481.039	15.259	264.905	0	0	1.11979	2.05984	2.71542	85.7253	0.498316	51.4532	174.623	4.51473	1.63051	324.969	8.66589	0.843778	3.25827	0.471674	3.87343	0.437322	0	5.98143	1.77528	0	1.25858	4.34482	0.336639	3.97595	0.214717	430.203	38.0712	11.9176	39.197	51.8571	212.13	31.7166
Pyrimidine metabolism	g__Paludihabitans	54.7042	0.354578	95.7011	0.729996	27.1828	0	0	7.37935	0	37.7501	11.9086	80.9227	64.3929	3.20047	2.75566	11.1683	1.16327	7.5915	149.49	10.599	1.47198	6.29179	35.9546	31.4245	161.704	520.214	1.63777	77.359	151.272	0.640872	127.183	32.0184	9.05952	69.3881	0.468468	143.687	10.3655	34.9896	193.777	53.566	249.685	59.6807	115.09
Pyrimidine metabolism	g__Parabacteroides	76.2728	0.49438	60.3599	0.460418	15.394	0.721186	0	17.1292	0	159.702	30.9767	63.1647	55.5236	3.1807	3.25845	15.7612	3.68459	9.51466	113.334	86.7176	0	215.34	40.8701	63.1132	26.1958	66.37	0.55538	95.484	20.6575	759.533	113.497	80.6591	184.054	43.7937	0.175566	2.74557	9.3346	244.726	2.3105	25.8891	16.6064	181.141	60.3101
Pyrimidine metabolism	g__Photobacterium	134.126	0.869368	0	0	1333.13	73.9458	0	22.1097	0	159.278	37.5051	223.887	3.26476	0	0	569.092	2.83852	801.757	3.52293	34.4141	0	20.0518	0.0818584	0.224607	0	0	73.9973	0	25.4312	0.206466	0	136.372	494.076	8.58922	0	0	0	0	0	0	0	0	0
Pyrimidine metabolism	g__Pseudoflavonifractor	38.7933	0.251448	162.568	1.24005	37.0871	0	0	40.3937	0	52.2863	101.855	36.1365	86.5388	2.75433	6.2665	99.2416	13.5626	14.6378	74.1784	39.924	4.72533	5.6184	11.092	38.6951	61.2578	140.701	3.89456	27.2677	54.8087	10.4051	47.5147	26.3269	86.4871	40.1424	7.31062	313.373	97.3963	294.378	128.742	66.2289	189.943	166.189	199.548
Pyrimidine metabolism	g__Ruminococcus	110.652	0.717219	131.757	1.00502	92.4759	25.8014	0	42.4718	0	118.376	73.0293	191.066	190.437	63.1029	33.9474	120.287	58.4852	82.0709	145.457	51.4613	8.82183	36.9372	67.488	294.345	205.145	344.142	22.8891	78.2562	252.271	15.768	131.995	182.264	193.779	197.001	33.5865	156.101	55.3209	114.383	317.892	127.209	129.338	137.776	114.205
Pyrimidine metabolism	g__Ruthenibacterium	178.921	1.15972	267.329	2.03916	61.9985	43.0679	0	60.6468	1.02256	66.6709	55.0805	210.675	237.605	165.344	41.7011	410.428	233.274	307.022	988.138	183.021	12.6923	50.3651	77.0408	335.622	231.109	489.762	58.3262	52.223	160.588	10.8179	131.961	223.31	145.991	322.138	24.5582	161.149	491.766	273.253	184.357	191.292	404.765	240.627	434.197
Pyrimidine metabolism	g__Terrisporobacter	109.602	0.710409	28.1007	0.214349	59.3942	244.821	0	3.83704	2.32889	118.533	125.889	65.5734	15.868	24.9772	0	87.6528	12.8458	355.404	16.4282	59.5407	1305.03	492.064	57.4667	46.9186	23.0667	16.8351	36.0308	8.97138	34.1201	10.5259	11.9248	10.5678	12.7351	28.697	8.21964	115.343	1.46891	31.6042	44.0535	20.6249	7.82545	22.5634	1.20299
Pyrimidine metabolism	g__Thomasclavelia	18.1554	0.117679	179.967	1.37277	7.37412	2.15345	0	19.1376	0	6.88238	39.5915	2.82591	8.88726	59.1544	6.23746	71.1338	0	71.156	6.30742	27.8828	36.2032	3.82027	4.98369	6.29077	3.89703	7.50663	6.12129	7.06734	10.2398	6.45584	1.52209	20.595	61.568	39.6683	21.9178	239.915	749.51	110.699	40.6129	59.0812	255.455	121.077	21.438
Pyrimidine metabolism	g__Vibrio	147.913	0.95873	0.617597	0.00471096	632.107	109.065	0	120.768	417.812	23.6507	159.633	331.16	2.71409	4.01438	5.5264	1026.98	4.55281	289.713	6.22636	145.731	0	71.6083	1.4178	0.94144	0.386926	0.546974	46.6925	0.225525	10.9692	801.565	2.00024	135.139	54.4201	31.8102	4.69319	0	0	0	0	0	0	0.865191	0
Pyrimidine metabolism	g__unclassified_c__Caudoviricetes	840.445	5.44754	42.6943	0.325667	42.102	1321.88	23.0186	183.495	1346.34	108.181	2316.22	145.476	87.0925	2272.89	338.349	201.114	739.25	1682.41	29.4728	9341.31	232.713	760.26	49.9617	484.024	58.9931	37.0545	83.575	132.39	88.5109	2133.62	183.834	75.6134	84.9341	629.249	1.57398	48.4719	22.1815	86.3066	46.29	55.1475	89.7717	20.7119	13.794
Pyrimidine metabolism	g__unclassified_f__Erysipelotrichaceae	21.0132	0.136202	242.896	1.85278	7.19049	0	0	2.29967	0	2.82045	86.9801	15.4319	55.3855	19.3646	11.6841	61.5943	2.18658	54.3159	2.88172	5.93853	0	11.5648	3.77471	31.6528	21.9755	7.7472	4.55428	1.83058	19.6431	26.5255	3.07626	34.5504	107.194	28.2321	45.3932	1010.93	138.607	378.62	4.31926	126.566	130.171	293.967	57.4973
Pyrimidine metabolism	g__unclassified_f__Nitrososphaeraceae	188.753	1.22345	97.9141	0.746877	6.34484	810.845	20.8248	0.308173	1997.34	1.3775	5.38956	15.3051	3.03548	23.7466	778.236	10.2086	89.4307	9.13343	20.2482	29.2042	1514.03	207.911	2.57797	3.14396	1.58155	3.49184	0.844226	0.239779	58.1144	23.9906	0	10.3595	10.9509	4.38641	17.4208	0.165639	524.882	94.3238	30.6872	25.7934	115.486	48.3084	24.1594
Pyrimidine metabolism	g__unclassified_p__Bacillota	48.9675	0.317394	795.839	6.07056	0	0	0	0	0	0	0	0	0	0	0	0	0	0	0	0	0	0	1469.03	0	0	0	0	0	0	0	0	0	0	0	5821.88	644.907	0	0	0	0	79.2858	500.071	116.413
RNA degradation	g__Akkermansia	13.9843	0.239454	64.3055	1.47947	0.312521	0	0	0	0	0.159726	0	2.98183	17.7172	0.109157	1.80336	0	0.23255	0	3.82522	1.41183	0	4.00015	0.146319	0	35.2046	0.700713	0.125338	49.0173	301.107	0	0.675783	0	0	0	0.227138	1.01606	140	20.5452	1.11771	0.399112	19.2325	0	396.212
RNA degradation	g__Alistipes	81.7606	1.39999	6.12762	0.140978	27.0729	0.696656	0	56.8361	0	343.955	90.4498	145.252	29.2573	2.26362	8.56046	55.7905	1.27686	30.7099	183.608	88.9763	0	217.904	9.97487	15.623	15.4235	128.528	7.62266	345.628	52.2072	59.8458	182.497	65.105	231.22	56.5351	1.06116	1.03596	4.05873	10.6785	1.7301	9.01375	2.49538	4.7544	20.3207
RNA degradation	g__Anaerorhabdus	157.96	2.70475	222.921	5.12873	49.2329	2.12638	0	712.745	0	86.0836	593.058	85.7043	177.465	633.837	299.624	338.409	43.5802	135.104	7.99322	11.4904	2.21865	43.6064	22.8732	45.6122	106.465	21.9772	58.8186	50.5122	126.269	199.586	10.4212	469.451	333.352	71.1836	24.3783	161.601	716.539	453.333	3.74848	173.536	370.26	59.2973	43.5985
RNA degradation	g__Anaerotruncus	41.3952	0.708809	62.0714	1.42807	19.8287	1.8573	0	57.7457	0.641288	47.1679	10.6905	69.8304	19.0444	5.12906	5.35808	43.2076	10.9303	18.9106	94.6365	9.32469	0	10.0751	197.476	26.2943	89.688	90.5707	5.28398	50.0126	44.1655	2.70821	92.3639	19.3476	61.4014	138.165	11.0597	64.2162	39.2353	32.032	93.028	104.279	97.3288	69.0905	48.3732
RNA degradation	g__Bacteroides	117.421	2.0106	47.4639	1.092	35.8463	1.42302	0	359.091	0	313.668	394.194	208.93	13.5728	5.39665	37.1434	30.8754	0.450086	19.2515	68.8844	534.951	2.73081	155.522	4.79394	24.237	17.0218	59.0751	4.20721	396.211	33.2682	100.495	41.203	359.867	48.2663	252.057	0.184478	6.88184	4.56671	89.5826	7.22407	48.6601	5.23377	184.335	80.5062
RNA degradation	g__Bilophila	90.6258	1.55178	58.5216	1.3464	46.446	0	0	83.5663	0	66.7135	36.2479	71.3963	515.367	1.30965	0.681609	31.6382	40.7244	5.24615	317.843	124.061	0	32.2473	37.1986	119.547	170.198	304.299	7.33909	128.943	60.8972	34.2602	188.108	42.2855	170.667	81.5433	12.092	58.5373	93.4408	30.1209	97.6364	104.093	39.5099	10.66	80.6044
RNA degradation	g__Bradyrhizobium	66.3062	1.13536	10.3981	0.239228	2.23825	100.376	331.51	0.261857	134.713	0.41791	0.68005	1.70612	1.69906	3.74965	80.0379	3.39123	22.4384	11.8684	3.65838	1.94715	1266.53	3.91409	1.12816	4.04876	0	2.43115	0.580367	0	2.3728	2.00237	0	1.63734	3.49626	0.35494	0.693105	0	47.2408	4.79611	0.625556	5.42226	4.97507	27.9636	1.86647
RNA degradation	g__Breznakia	646.058	11.0624	34.9994	0.805228	1495.17	52.4909	3456.99	2.06714	56.899	360.659	281.577	577.766	275.873	1554.82	8.32063	588.429	1590.41	1500.27	2.61466	492.906	0.694732	2314.62	1095.2	405.506	11.2056	129.107	613.083	22.9275	222.821	1150.52	266.133	91.271	562.838	198.552	30.3822	18.555	69.6212	41.9933	48.2506	25.631	49.8931	11.6315	19.0367
RNA degradation	g__Candidatus_Avidesulfovibrio	67.8372	1.16158	17.8901	0.411596	42.8134	0	0	81.6484	0.603893	57.1894	32.119	52.4315	387.739	0.977457	0	24.3344	29.3197	4.63306	191.018	106.263	0.871171	16.547	3.77482	135.921	153.831	211.569	4.8183	47.2882	67.8031	23.3444	132.656	36.6679	124.437	64.4988	0.988795	21.6953	45.9104	21.2772	2.25131	2.42083	24.129	4.37701	37.9611
RNA degradation	g__Candidatus_Fimihabitans	71.624	1.22642	7.72828	0.177804	114.93	0.374665	0	669.078	0	172.404	73.256	106.463	86.2237	44.3469	8.09218	58.8196	7.61664	51.5658	7.8882	168.014	0	23.5678	0.570694	7.84184	43.9318	22.8359	71.4085	28.7768	37.0821	0.310597	4.34246	217.798	6.16674	115.014	0	0.131563	0	34.3952	0	2.37371	14.8693	0.638845	17.1459
RNA degradation	g__Candidatus_Methanobinarius	21.9048	0.375075	57.3891	1.32035	0	0	0	0	0	0	0	0	0	0	0	0	0	0	0	0	0	0	657.143	0	0	0	0	0	0	0	0	0	0	0	399.314	62.4765	0	0	0	0	8.00604	33.5724	13.133
RNA degradation	g__Candidatus_Methanorudis	0	0	61.6602	1.41861	0	0	0	0	0	0	0	0	0	0	0	0	0	0	0	0	0	0	0	0	0	0	0	0	0	0	0	0	0	0	420.719	82.3083	0	0	0	0	3.97726	47.9379	0
RNA degradation	g__Christensenella	91.4012	1.56506	25.2378	0.580643	21.9413	0.216661	0	8.53369	0	29.9097	27.6467	87.1973	217.502	4.63725	4.62007	25.5356	23.4726	28.012	74.2692	6.46645	0	10.4437	51.0423	664.84	457.219	393.115	39.0433	19.4011	123.079	4.73189	168.244	69.3921	22.7669	158.759	10.9772	1.69487	41.2607	38.1755	3.60102	53.268	25.8303	6.70196	45.6303
RNA degradation	g__Clostridium	361.501	6.18997	222.669	5.12293	564.873	282.808	10.0031	383.162	1.46483	254.851	500.612	813.317	575.575	208.776	111.897	650.316	1033.41	358.971	247.84	231.157	60.1342	261.075	150.269	418.441	726.551	357.463	163.938	403.938	383.574	16.468	154.613	526.7	441.924	550.902	375.453	134.234	140.767	257.776	234.782	172.837	363.996	153.088	171.092
RNA degradation	g__Coprobacillus	44.2015	0.756862	44.3517	1.0204	7.36272	0	0.745815	82.1189	0	49.0425	216.99	10.4391	14.6223	297.331	0	181.031	0.134913	25.3702	1.09562	200.888	0	8.03323	2.98479	11.3818	3.92758	4.35344	0.267755	5.23761	8.74927	14.7417	4.7778	68.881	36.8288	68.709	9.76579	68.9216	112.78	70.8748	3.87487	26.06	54.4728	33.0897	19.3264
RNA degradation	g__Cucumispora	56.017	0.959178	0	0	0	0	0	0	0	0	0	0	4.67749	0	4.52205	0	0	0	0.319364	0	0	0	6.30024	0	0	0	952.52	0	712.17	0	0	0	0	0	0	0	0	0	0	0	0	0	0
RNA degradation	g__Desulfovibrio	115.146	1.97164	112.588	2.59029	81.3614	0.268085	0	55.5493	0	768.578	42.2861	87.8093	81.6344	0.561533	1.26269	29.6782	94.2661	12.4332	565.536	92.5646	0	36.8345	188.444	115.537	177.938	68.7379	5.19021	186.964	43.4975	15.647	278.301	102.059	174.167	147.265	94.0142	106.065	16.8847	13.6238	52.2133	87.9259	10.5846	416.488	215.489
RNA degradation	g__Dorea	7.9452	0.136046	42.1679	0.970154	6.53818	0	0	9.038	0	3.62553	3.75514	12.8737	8.48592	10.5001	22.9452	19.1896	5.77913	0.692831	7.40826	2.0201	2.86531	0.568686	4.41334	6.64376	7.79455	8.58124	0.57719	7.89718	11.7937	1.9378	8.63774	14.8273	4.24997	44.7164	16.5011	12.0323	78.9563	94.3962	76.4647	28.3608	27.4994	30.1105	15.1899
RNA degradation	g__Faecalicatena	15.5188	0.265728	36.6001	0.842054	13.9827	0	0	7.07019	0	2.41811	18.1006	41.3781	3.52765	15.4154	16.0277	19.2591	8.09554	5.7974	5.63933	1.31672	3.9906	0	9.55303	11.6951	28.3075	5.63665	1.29034	10.4313	9.01762	5.61926	9.98811	94.5118	23.5971	93.8962	12.5146	16.9752	22.23	46.9385	95.7123	50.8845	33.5007	28.6832	21.9616
RNA degradation	g__Holdemania	41.3722	0.708415	11.3728	0.261652	21.1051	1.6697	13.932	7.84148	1.68616	6.50865	295.52	64.3129	140.439	6.32966	5.78356	87.784	12.3828	5.43252	4.15315	3.61694	0	41.0783	18.2987	13.863	73.979	18.8482	3.24589	3.45739	52.8265	73.9987	11.3942	80.2878	145.277	26.1131	2.99129	5.30736	4.91707	20.1238	0.56957	15.2301	19.8482	10.7079	22.6594
RNA degradation	g__Hungatella	5.36627	0.0918866	55.9737	1.28778	2.33117	0	0	3.5805	0	1.89791	1.85606	13.6617	4.55813	4.96145	14.6673	9.95462	1.94669	3.54735	8.21515	0.455123	0.792137	0	10.2992	4.69635	7.23611	13.0404	1.27656	5.03855	9.5446	1.1659	13.4361	10.971	1.57097	10.2873	7.48712	14.9647	54.629	134.812	81.965	45.706	123.671	25.0344	15.4942
RNA degradation	g__Hydrogenoanaerobacterium	15.7517	0.269716	61.7135	1.41984	14.4917	0.68577	0	20.9328	0	17.7743	13.4608	30.6841	12.4626	3.31666	4.81971	13.9235	7.79145	12.9733	32.0673	5.51022	2.40985	1.89245	23.5233	16.3908	25.6518	49.1019	4.80166	23.1106	26.7939	2.17286	20.935	19.7199	41.8121	23.34	10.355	23.952	164.998	77.3062	29.1913	123.019	47.6484	22.1827	56.7683
RNA degradation	g__Hyphomicrobium	85.474	1.46357	3.34015	0.0768466	2.9892	570.202	40.049	2.56325	971.904	1.15115	10.2735	4.55587	11.7265	25.2587	303.411	22.8484	97.8561	19.8036	10.0964	9.0291	353.066	42.3396	3.38613	10.7836	1.94159	4.09285	0.602527	0	11.0375	14.9922	0	7.25224	9.93255	1.07543	0.228567	0	11.9309	1.75804	0.378795	0.687445	1.02652	13.8389	0.21228
RNA degradation	g__Intestinimonas	6.7249	0.11515	39.2982	0.90413	4.46984	0	0	9.5149	0	10.4348	32.6311	6.53773	6.45517	0.204769	0.251325	15.1889	0.411554	0.696387	7.03113	7.52168	0	5.02071	3.80834	5.33631	10.5596	22.8226	0.290496	4.82375	10.6031	1.75074	6.60595	5.97395	18.0663	4.73592	1.49486	55.8199	7.2891	30.5626	74.7337	12.921	35.2339	37.1308	98.4978
RNA degradation	g__Kineothrix	13.8184	0.236612	115.643	2.66059	12.3717	1.53214	0	11.2473	0.348167	3.13269	0.968712	18.3225	3.91499	12.8031	0.854192	6.80193	0.35904	6.35611	51.2997	11.7504	0	0.614442	65.297	5.45826	13.2635	24.3751	4.74244	18.2042	26.4679	0	51.8577	23.7941	3.0536	35.3606	30.1626	94.7671	9.02303	27.0915	252.294	247.306	55.1557	100.86	224.129
RNA degradation	g__Lachnoclostridium	11.2236	0.192181	72.786	1.67458	7.0327	0.291485	0	8.33187	0	3.15865	5.41469	18.9053	15.9615	10.8682	29.7824	19.4227	3.91028	2.94419	20.7481	2.67699	2.33918	0.384027	5.00938	8.05316	9.55903	7.79892	3.018	10.47	28.2203	1.97878	8.93824	22.6753	5.15576	73.6576	24.9509	19.3695	73.1118	198.549	71.4085	35.0991	126.299	22.4683	83.8183
RNA degradation	g__Mailhella	31.0283	0.531297	25.1039	0.577564	19.9979	0	0	31.8158	0	44.2861	10.5263	24.2198	19.6592	0.947312	0.501945	19.1464	22.9957	8.06459	103.27	100.085	0.885719	7.95934	24.4864	99.9911	79.037	52.1818	7.97191	37.8358	9.50384	0.274746	110.976	13.3525	26.7103	54.1675	16.7805	21.5238	2.72877	4.84092	4.5633	5.10189	24.5992	17.5123	128.285
RNA degradation	g__Methanobrevibacter	22.0452	0.37748	272.773	6.27566	0	0	0	0	0	0	0	0	0	0	0	0	0	0	0	0	0	0	661.357	0	0	0	0	0	0	0	0	0	0	0	1866.45	323.072	0	0	0	0	31.1632	189.342	44.9274
RNA degradation	g__Methyloceanibacter	133.933	2.29334	6.38221	0.146835	7.21964	1315.39	62.6905	3.73959	941.282	0.506716	9.96654	9.44598	16.1625	26.4669	647.314	12.9962	63.8892	10.9035	10.8788	13.6874	740.909	39.3802	3.99194	17.5535	3.3913	7.88242	0.221064	0	18.2862	16.5219	1.43209	8.85803	4.40675	2.62527	0.506889	0	34.5102	3.79793	0.169648	2.05539	3.18089	11.6735	1.54539
RNA degradation	g__Microbacterium	23.5845	0.403838	37.5858	0.864732	6.79073	109.382	248.969	2.26712	54.5744	0	1.58903	3.42045	1.20758	3.36503	84.0325	1.66468	20.7908	3.987	1.72873	0.505126	125.016	18.5745	0	3.23324	0	3.71104	0.526869	0	2.86465	4.87846	0	0.582199	3.32698	0.548455	1.7112	0.393154	135.004	14.9831	16.4304	37.4019	21.3278	59.0905	51.9296
RNA degradation	g__Mucispirillum	14.3529	0.245765	33.4179	0.768843	3.82226	0	0	1.09275	0	27.976	0.561022	37.5185	0	1.33816	0	8.48636	9.01996	32.6959	0	8.874	0	14.7193	117.74	0	0.123279	42.1416	5.67207	30.3145	31.7013	19.1413	6.54469	2.33303	19.3753	9.39673	29.0137	10.8609	0.284879	1.22195	17.7427	0.0534491	0.193037	240.995	0.39566
RNA degradation	g__Mycobacterium	105.258	1.80232	6.10131	0.140372	13.6922	941.137	149.978	2.47555	757.212	0.585879	23.9905	13.6068	41.9778	43.5967	383.497	21.7987	122.813	9.14267	28.2909	25.2838	301.832	143.269	6.84454	35.7809	6.8167	16.6364	0.619657	0	16.4225	21.2719	0.959984	14.0171	11.1224	3.054	0.640081	0	16.7424	3.20728	3.77303	5.87799	3.52849	17.7057	3.43676
RNA degradation	g__Mycolicibacterium	59.3527	1.01629	3.99302	0.0918671	6.32505	451.034	139.081	0.482291	541.714	0	9.05582	7.7033	14.2371	21.8294	183.157	15.864	73.6424	6.12319	6.06638	7.534	166.233	77.6016	1.64979	13.0618	2.63314	5.2616	0.900973	0	6.53001	13.6863	0	4.43068	4.27881	0.463389	0.216322	0	7.44989	3.72903	1.85766	2.48423	1.21661	10.1769	8.8066
RNA degradation	g__Nocardioides	48.9399	0.837997	78.6684	1.80992	9.70432	104.75	448.773	12.525	287.783	0	1.15058	1.3918	2.90071	1.09753	110.451	0.907782	65.4621	136.435	2.18386	2.36676	228.343	29.3969	0.609315	3.32729	0.615191	3.73804	0.423259	0.236958	6.88805	1.75731	0	0.373601	4.43215	0.174667	5.1533	0	373.633	39.8741	10.7961	35.2064	36.9829	178.2	28.17
RNA degradation	g__Paludihabitans	25.2774	0.432824	40.4935	0.93163	17.1634	0.294277	0	10.3592	0	20.1295	6.15817	33.0535	40.296	4.47907	1.05921	8.21051	0.15602	4.02687	91.8617	5.16233	1.85597	4.23699	19.3931	19.0265	64.0379	199.736	2.0866	41.4557	74.9402	0.524611	56.1855	11.3602	6.71039	14.3616	0.798026	65.9999	3.26976	17.2471	86.5907	24.2678	98.8844	23.1491	44.2343
RNA degradation	g__Parabacteroides	30.9108	0.529286	25.3736	0.583767	6.24418	0	0	9.25125	0	75.4027	11.087	23.9368	3.25975	0.298351	9.5319	6.41555	0.155363	11.3765	35.5031	34.8794	0	81.5672	18.1037	20.9699	8.45387	18.048	0.195748	38.5956	19.0769	322.304	54.1513	38.1147	67.0654	13.337	0.153342	1.42031	0	105.107	1.13384	12.5816	4.58367	81.1349	22.2473
RNA degradation	g__Photobacterium	53.5182	0.91639	0	0	645.818	31.153	0	10.4599	11.0549	69.7053	22.9792	105.582	0.609317	0	0	285.935	2.16088	29.1926	2.52122	16.6551	1.14341	9.10424	0	0.904549	0.348925	0	38.8499	1.021	8.54408	3.87766	0	58.5157	244.08	5.32751	0	0	0	0	0	0	0	0	0
RNA degradation	g__Plesiomonas	56.9193	0.974628	0.366415	0.00843007	1.18131	0.34754	0.538269	0.0853743	0	0	0	2.44242	169.753	0.0776694	16.9825	2.34755	0	0	121.421	0	0	2.15724	3.02947	32.9218	30.8219	19.1998	0	1140.66	11.6244	0.553346	147.722	0.248098	3.46559	0	0	0.306275	0	0	1.97788	0.810085	0	0.203495	0
RNA degradation	g__Pseudoflavonifractor	22.3431	0.382581	61.6599	1.4186	23.1343	0	0	16.6578	0	25.1324	31.1389	31.029	15.0664	74.3926	2.25995	42.2955	4.46279	33.7311	30.0931	13.5214	0	6.53377	19.7568	12.6489	29.4795	51.041	10.164	12.3442	21.4749	4.0779	22.144	53.0494	55.1556	29.5088	3.51517	106.664	23.9956	93.7642	67.5445	25.1003	84.945	64.6209	84.7894
RNA degradation	g__Pseudolabrys	39.4612	0.675693	4.50189	0.103575	3.6143	235.046	78.1203	0.213195	257.929	0.337254	2.37103	2.2271	15.1712	6.55236	261.002	5.47627	23.7242	2.70638	5.56906	5.93239	211.349	25.1247	4.54251	14.5576	1.91451	6.80736	0	0	4.64104	4.51108	0	0.998877	2.5659	0.831246	0.175566	0	15.4936	2.19633	0.170426	2.92876	2.37086	16.3038	0.877599
RNA degradation	g__Pseudonocardia	33.6954	0.576965	11.9835	0.275704	7.75635	84.3723	402.975	2.16181	125.028	0.179615	0.733444	0.486425	2.20518	2.07209	30.6119	0.769253	43.7616	57.7442	2.2002	1.73185	210.139	8.0446	16.3677	2.29348	0.4228	0.226412	0.185409	0	1.56556	3.34363	0	0.899254	2.46851	0.116657	0.982391	0	8.29186	1.76573	1.19303	11.1623	4.28274	76.3281	3.84567
RNA degradation	g__Rikenella	68.7746	1.17763	3.50101	0.0805474	23.7941	1.22153	0	31.0685	0	221.067	96.6953	111.697	32.0868	2.41568	6.40388	64.1346	2.91923	21.5013	286.777	69.3262	0	159.987	7.77168	19.8744	19.739	125.509	5.72074	326.46	34.8038	27.8186	160.136	49.5571	125.946	28.8057	0	0	0	0.0745041	0	0	1.09285	2.83247	27.5092
RNA degradation	g__Ruminococcus	26.1467	0.44771	23.6275	0.543596	20.9281	0.745692	0	14.5364	0	29.8565	21.7571	50.7616	35.2283	6.10529	5.76921	25.0304	9.8271	12.2472	18.3365	17.1609	2.17055	10.3182	9.87353	35.7042	58.8738	49.9951	3.31182	30.3242	77.0816	7.44275	24.6466	64.1685	65.9301	76.2704	0.398802	27.6042	14.5005	20.2173	46.7506	14.412	25.8475	37.5253	25.3912
RNA degradation	g__Ruthenibacterium	73.6211	1.26061	72.6825	1.6722	25.9639	9.29132	0	23.286	0	25.2979	20.7353	76.8227	113.009	58.3715	23.5965	144.141	88.5006	133.588	471.734	65.043	1.49889	19.9223	36.8401	134.469	91.5302	230.32	23.8141	30.6036	68.9086	2.85872	53.2983	73.4089	57.3782	104.401	11.5082	44.6834	122.063	67.9673	52.5865	48.2742	120.17	73.3022	113.588
RNA degradation	g__Vavraia	53.6182	0.918103	0	0	6.42235	0	0	0	0	0	0	0	5.0464	0	3.13296	0.152492	0	0	0	0	0	0	4.80989	0	0	0	1041.49	0	547.488	0	0	0	0	0	0	0	0	0	0	0	0	0	0
RNA degradation	g__Vibrio	95.2992	1.63181	0.884283	0.0203446	391.832	67.259	0	80.6681	279.509	14.3916	97.5901	184.028	5.24039	1.12417	0	676.815	1.48731	188.053	9.71644	83.8688	0	34.4819	0	0.915682	0.201441	0.284765	26.458	39.8661	8.18498	531.22	5.15718	76.2972	35.4292	18.8938	0	0	0	4.61737	0	1.96361	0	0	1.37757
RNA degradation	g__unclassified_f__Erysipelotrichaceae	7.05488	0.120801	111.306	2.5608	1.52304	0	0	10.7479	0	7.10918	29.6873	2.54307	4.26843	48.0046	5.73464	26.7192	0.245174	4.30104	0.110217	28.9612	0	1.66704	0.624964	5.20611	2.02873	0.940767	0	0.217578	1.49811	2.42177	1.31882	10.904	5.08714	9.77661	34.6901	398.065	98.4346	160.874	8.91321	75.2343	70.7333	121.665	33.1407
RNA degradation	g__unclassified_f__Nitrososphaeraceae	52.9689	0.906985	35.8632	0.825102	0.377434	197.02	13.2489	0.209641	558.667	0.17043	1.78688	3.68937	2.27179	7.4728	206.331	1.68488	24.5609	1.82593	3.78578	7.71747	440.965	85.808	1.01175	1.17129	0.491567	0	0	0	15.7559	6.1716	0	3.35819	2.64825	0.864378	4.58081	0.161037	199.232	32.0932	9.40265	9.70741	38.2878	22.7076	6.59682
RNA degradation	g__unclassified_o__Methanobacteriales	0	0	68.4873	1.57568	0	0	0	0	0	0	0	0	0	0	0	0	0	0	0	0	0	0	0	0	0	0	0	0	0	0	0	0	0	0	477.892	81.3149	0	0	0	0	4.97918	51.3768	0.822883
RNA degradation	g__unclassified_p__Bacillota	42.5487	0.72856	445.021	10.2386	0	0	0	0	0	0	0	0	0	0	0	0	0	0	0	0	0	0	1276.46	0	0	0	0	0	0	0	0	0	0	0	3230.15	350.094	0	0	0	0	60.5626	273.53	90.8493
alpha-Linolenic acid metabolism	g__Actinobacillus	0.861527	0.474777	0	0	0	0	0	0	0	0	0	0	0	0	25.0796	0	0	0	0	0	0	0	0.31403	0.452166	0	0	0	0	0	0	0	0	0	0	0	0	0	0	0	0	0	0	0
alpha-Linolenic acid metabolism	g__Actinomadura	3.44581	1.89894	0.273708	0.517834	0	3.83982	11.7413	0.116467	60.1431	0	0	0.116868	0.166298	0.3399	7.02421	0.0938715	2.36439	0	0.1377	0.284951	16.1544	0	0	0	0	0.170507	0	0	0.435378	0.245265	0	0	0	0	0	0	0	0	0	0.489062	0.424606	1.54971	0
alpha-Linolenic acid metabolism	g__Aeromonas	1.97666	1.08931	0.0853881	0.161548	0.181852	0	0	3.52474	0	0	0	0	1.05791	0	0	0	0	0	2.06532	0	0	0	0	1.79343	0	0	0	45.6303	4.4465	0	0	0.599787	0	0	0	0	0	0	0	0	0	0.768493	0
alpha-Linolenic acid metabolism	g__Agromyces	3.22275	1.77602	4.14536	7.84268	0.240915	3.02421	47.2296	0.209641	5.34082	0	0	0	0.256574	0	6.94135	0	2.4466	0	0	0	30.5817	0	0	0.192339	0	0	0	0	0.218772	0	0	0	0	0	0.180807	0	22.1406	2.27275	0.806774	1.16959	3.16294	5.78782	1.78688
alpha-Linolenic acid metabolism	g__Bacteroides	0.546562	0.301204	1.17389	2.22091	0	0	0	0	0	1.32001	0	0.369411	0	0	0	0	0	0	0	1.16305	0	1.84333	0	0	0	0.380996	0	9.72346	0.454895	0	0.202139	0.126045	0	0.813535	0	0	0	0	0	0	0	10.0527	0.512295
alpha-Linolenic acid metabolism	g__Baekduia	1.36998	0.754978	0.0390215	0.0738255	0	8.13666	4.13765	0	11.5825	0	0	0	0	0	0	0	2.3577	0	0	0.757308	13.8955	0	0	0	0	0	0	0	0	0.231997	0	0	0	0	0	0	0	0	0	0	0	0.351193	0
alpha-Linolenic acid metabolism	g__Bauldia	3.80701	2.098	0.981087	1.85614	0.774451	18.9668	5.93676	0	24.7359	0	0	0.208307	0	0.339618	9.94344	0.405335	3.03566	0.299306	0	0.171004	43.4929	1.40675	0.745821	0	0	0	0.239486	0	0.20358	2.1441	0	0.577154	0.583903	0	0	0.171955	1.84039	0.736021	0	0.567364	1.02613	4.48792	0
alpha-Linolenic acid metabolism	g__Beggiatoa	1.51956	0.837411	0.195092	0.369099	0	25.5046	0	0	8.8849	0	0.215867	0	0	1.40589	1.41819	0.286829	0	0	0	1.9907	3.0491	1.52733	0	0	0	0	0	0	0.348993	0.246579	0	0.707853	0	0	0	0	1.03208	0.723754	0	0	0	0	0
alpha-Linolenic acid metabolism	g__Candidatus_Acidiferrum	7.31587	4.03169	0.0261815	0.0495332	19.4982	0	3.89094	0	1.00983	1.86787	0.207564	1.07129	25.7417	0	0	0	0	0.236813	0	0.297534	0	3.91623	31.5789	9.10521	25.6236	14.5372	0	0	16.4833	8.37738	55.1046	0.20973	0.718105	0	0	0	0	0	0	0	0.235633	0	0
alpha-Linolenic acid metabolism	g__Capillimicrobium	2.13683	1.17758	0.184517	0.349092	0	5.02529	0.597777	0	43.415	0	0.0949162	0.227244	0.679625	0.172512	6.30833	0.181611	0.927102	0	0.133202	0.244905	3.86117	0	0.271207	0.486662	0	0.837037	0	0	0.332572	0.216841	0	0.0918419	0	0	0	0	0	0	0	0.675903	0	0.984752	0
alpha-Linolenic acid metabolism	g__Citrobacter	0.0104724	0.00577121	2.0303	3.84116	0	0	0	0	0	0	0	0	0.314172	0	0	0	0	0	0	0	0	0	0	0	0	0	0	0	0	0	0	0	0	0	0	0.244527	0	0	14.1995	3.82868	0	0	0
alpha-Linolenic acid metabolism	g__Clostridium	6.17505	3.40299	0	0	10.0436	19.4223	0	0.218124	0	2.24206	2.17107	4.65458	10.847	0.789192	0	27.3783	50.9364	0.474205	3.65793	1.30818	0	0	0	4.66845	18.8907	1.0894	0.693684	3.24115	6.32237	0	0	1.68181	10.4774	4.04355	0	0	0	0	0	0	0	0	0
alpha-Linolenic acid metabolism	g__Cryobacterium	0	0	1.08036	2.04395	0	0	0	0	0	0	0	0	0	0	0	0	0	0	0	0	0	0	0	0	0	0	0	0	0	0	0	0	0	0	0	0	0	0	0.148612	0	0	0	9.57462
alpha-Linolenic acid metabolism	g__Cylindrospermum	0	0	1.1604	2.19539	0	0	0	0	0	0	0	0	0	0	0	0	0	0	0	0	0	0	0	0	0	0	0	0	0	0	0	0	0	0	0	0	10.4436	0	0	0	0	0	0
alpha-Linolenic acid metabolism	g__Dermatobacter	2.51437	1.38564	0.251006	0.474884	0.331612	7.22837	2.45273	0.454908	11.4876	0	0	0.555485	0	0.211913	18.2548	0	4.37306	0.399074	0.31185	0.20056	22.7108	4.71675	0	0.426692	0	0.609732	0	0	0	0.253832	0	0.451272	0	0	0	0	0.465498	0	0	0.820335	0.252266	0.720957	0
alpha-Linolenic acid metabolism	g__Desulfatitalea	0	0	2.05194	3.88212	0	0	0	0	0	0	0	0	0	0	0	0	0	0	0	0	0	0	0	0	0	0	0	0	0	0	0	0	0	0	0	0.952057	0.264829	0.267428	3.59544	0.338093	11.3187	0.957799	0.773172
alpha-Linolenic acid metabolism	g__Desulfovibrio	0.980488	0.540335	0	0	1.20372	0	0	4.96872	0	1.81469	0	1.12085	0	0	0	1.02891	0	0.460142	0	0.23125	0	0	0.7644	3.5771	1.11259	1.57279	1.14544	0.143355	0.469465	0	8.72506	0.520328	0.555822	0	0	0	0	0	0	0	0	0	0
alpha-Linolenic acid metabolism	g__Flavonifractor	1.83956	1.01376	3.45407	6.53483	1.9805	0	0	2.02589	0	3.07602	7.11586	1.92908	1.70159	0.176503	0	6.39073	0	0.166195	1.70484	2.43161	0	0	3.06294	0.198512	0.967444	3.39181	0	0.20711	5.57602	1.46026	1.29365	2.0603	5.70775	2.5623	0.557205	5.1967	0	1.61448	4.23982	0.8453	3.90369	3.30343	11.426
alpha-Linolenic acid metabolism	g__Frankia	0.723778	0.398865	0.23835	0.450939	0.27366	5.21985	0	0	3.54421	0	0	0.218419	0	0.16665	5.20463	0.526318	0.358239	0.313835	0.514704	0.157722	3.72997	1.29749	0	0.187671	0	0	0	0	0	0	0	0	0	0	0	0	0.876764	0	0	0	0	1.26839	0
alpha-Linolenic acid metabolism	g__Gordonia	0.859584	0.473706	0	0	0	13.6136	1.3366	0	6.8362	0	0.198825	0	0.283581	0	2.82146	0	0.414592	0	0	0	0	0	0.282627	0	0	0	0	0	0	0	0	0	0	0	0	0	0	0	0	0	0	0	0
alpha-Linolenic acid metabolism	g__Intestinimonas	1.08077	0.5956	0	0	0.53183	0	0	0	3.04211	1.85269	1.6612	2.56275	1.25424	0	0	5.98427	0	0	0	0.204344	0	0	1.98813	0.243146	1.56194	3.0355	0	0	1.38813	0.539393	1.2657	1.11322	2.77722	1.41734	0	0	0	0	0	0	0	0	0
alpha-Linolenic acid metabolism	g__Lawsonibacter	0	0	1.2391	2.34427	0	0	0	0	0	0	0	0	0	0	0	0	0	0	0	0	0	0	0	0	0	0	0	0	0	0	0	0	0	0	0	4.32614	0.931292	2.65305	0	0.254503	0	0.432595	2.55427
alpha-Linolenic acid metabolism	g__Marmoricola	1.25023	0.688989	0.216398	0.409408	0	0	11.3293	0	23.2518	0	0	0	0	0	0	0	0	0	0	0	2.44705	0	0	0.246243	0	0	0	0	0.232662	0	0	0	0	0	0	0	1.05301	0	0	0.203333	0	0.691237	0
alpha-Linolenic acid metabolism	g__Methyloceanibacter	0.820361	0.452091	0	0	0	12.2954	0	0	4.68017	0	0	0	0	0	4.70569	0	0	0	0	0	2.59586	0	0	0	0	0	0	0	0	0	0	0	0.333731	0	0	0	0	0	0	0	0	0	0
alpha-Linolenic acid metabolism	g__Microbacterium	5.13392	2.82924	5.44986	10.3107	0.345853	16.1213	70.8449	0.393078	5.19621	0	0	0	0.262831	0.205568	7.37901	0	2.55747	0	0.297834	0.190004	43.7264	4.19005	0	0.68767	0	1.13926	0	0	0.269774	0.210495	0	0	0	0	0.607007	0	19.7614	1.67495	4.61121	5.74983	2.587	9.28934	4.76801
alpha-Linolenic acid metabolism	g__Microbulbifer	0.846344	0.46641	0	0	0	24.8317	0	0	0	0	0.19176	0	0	0	0	0.366909	0	0	0	0	0	0	0	0	0	0	0	0	0	0	0	0	0	0	0	0	0	0	0	0	0	0	0
alpha-Linolenic acid metabolism	g__Muribaculum	0	0	5.04361	9.54212	0	0	0	0	0	0	0	0	0	0	0	0	0	0	0	0	0	0	0	0	0	0	0	0	0	0	0	0	0	0	0.175849	2.35634	8.01108	19.6359	11.3256	3.0372	0	0	0.850489
alpha-Linolenic acid metabolism	g__Mycobacterium	29.6575	16.3439	1.09456	2.07081	2.48687	273.741	47.662	0.608803	260.037	0	5.22255	3.03544	8.54851	9.92746	95.4994	7.79985	32.6071	4.64569	7.77968	5.47813	75.0565	18.8721	0.244087	7.35408	1.62482	3.8382	0	0	4.71691	5.70325	0	3.15384	2.40992	1.67041	0	0	2.38168	0	0	1.24226	0.928948	4.40591	0.892197
alpha-Linolenic acid metabolism	g__Mycolicibacter	0.779953	0.429823	0	0	0.178399	11.6668	0	0	3.85077	0	0.119546	0.142387	0	0.651833	2.82741	0.114369	0.934143	0	0	0.102819	1.21578	0.845831	0	0	0	0	0	0	0	0.54622	0	0	0	0.202304	0	0	0	0	0	0	0	0	0
alpha-Linolenic acid metabolism	g__Mycolicibacterium	17.4488	9.61582	0.359835	0.68078	1.49373	145.242	48.0686	0	154.381	0	2.83858	2.52218	3.17363	5.82078	36.5771	3.92933	25.6491	1.37225	2.59668	3.62275	53.9078	14.4097	0.252108	2.65792	0	3.00315	0	0	2.29586	5.76426	0	1.86836	1.67102	0.345557	0	0	0	1.01719	0.200827	0	0.231812	1.05738	0.731316
alpha-Linolenic acid metabolism	g__Nitrosomonas	0.906081	0.49933	0	0	0	1.78619	0	0	5.65974	0	0	0	0	0	2.07782	0.210119	0.858108	0	0	0.377799	14.4462	1.55397	0	0	0	0	0	0	0	0	0	0.212518	0	0	0	0	0	0	0	0	0	0	0
alpha-Linolenic acid metabolism	g__Nocardioides	6.19421	3.41355	9.73365	18.4153	1.93617	6.19358	64.832	0.403588	44.9706	0	0	0	0	0	12.2631	0.185336	6.20845	3.1115	0.702881	0.218058	39.5303	3.54371	0	0	0	0	0	0	0.451007	0.763798	0	0.245323	0.266985	0	0.381812	0	52.9933	5.01317	1.39579	5.21663	3.47738	14.8377	4.28709
alpha-Linolenic acid metabolism	g__Paeniclostridium	1.87829	1.0351	0	0	2.50551	2.27574	0	5.86996	0	1.11095	16.7896	0.999873	5.18849	0	0	2.67708	8.74635	0	0.3927	0.240672	0	0	0	0	2.02635	0	0	3.28231	0	0	0	2.43687	0.385644	1.42062	0	0	0	0	0	0	0	0	0
alpha-Linolenic acid metabolism	g__Parabacteroides	0.292831	0.161376	2.0998	3.97266	0	0	0	0	0	0.523182	0	1.56957	0	0	0	0	0	0	0	0	0	0	0.624408	0	0.227207	1.28475	0	1.63942	0	0	0	2.12518	0.605372	0.185837	0	0.145453	0	8.82513	0	0.550966	0	7.95919	1.41748
alpha-Linolenic acid metabolism	g__Photobacterium	11.1542	6.14693	0	0	136.64	6.34854	0	3.04013	0	15.8901	3.67146	18.9287	0.179005	0	0	63.2998	0.634761	3.20942	0.742301	3.14279	0	4.1581	0	0	0	0	9.17829	0	1.25418	0	0	15.147	47.9491	1.2111	0	0	0	0	0	0	0	0	0
alpha-Linolenic acid metabolism	g__Plesiomonas	7.97415	4.39446	0.0119655	0.0226378	0	0	0	0	0	0	0	0.363798	19.2279	0	2.49377	0	0	0	18.4753	0	0	0	0.571968	5.83332	7.59463	2.46241	0	153.705	2.6105	0	25.2055	0	0.680419	0	0	0	0	0	0.10769	0	0	0	0
alpha-Linolenic acid metabolism	g__Prescottella	0.804424	0.443308	0.0437158	0.0827068	0	0.540889	0	0	3.08967	0	0	0	0	0	0	0.45882	0	0	0	0	20.0433	0	0	0	0	0	0	0	0	0	0	0	0	0	0	0	0	0	0	0	0.393442	0	0
alpha-Linolenic acid metabolism	g__Pseudomonas	3.42309	1.88642	0	0	0	0	0	0	10.9626	0	0	0	0	0	0	0	0	0	0	0	0	0	0	0	0	0	0	0	0	91.7301	0	0	0	0	0	0	0	0	0	0	0	0	0
alpha-Linolenic acid metabolism	g__Rhabdothermincola	1.72051	0.948152	0.152523	0.288561	1.29595	9.99491	9.05855	0	11.1894	0	0	0	0	0	4.94228	0	1.69649	0	0	0	11.0398	1.53611	0	0	0	0	0	0	0.252719	0	0	0	0.6091	0	0	0	0	0	0	0	0.246467	1.12624	0
alpha-Linolenic acid metabolism	g__Rhodoflexus	5.99117	3.30166	0	0	22.1427	0	4.54615	0	0	1.46476	0.0802052	1.05082	21.1632	0	0	0	0	0.823567	0	0.137965	0	4.53983	22.3461	6.56649	18.9175	14.075	0	0	13.444	5.86346	41.9101	0	0.66321	0	0	0	0	0	0	0	0	0	0
alpha-Linolenic acid metabolism	g__Rhodoplanes	1.08502	0.597939	0.0683111	0.129239	0	14.9138	0	0	8.26982	0	0.183382	0	0	0.3333	0	0.526318	2.14944	0	0	0.630887	1.86498	2.59498	0	0	0	0	0	0	0.213462	0.209473	0	0	0.505456	0.155165	0.176418	0	0.438382	0	0	0	0	0	0
alpha-Linolenic acid metabolism	g__Scandinavium	0	0	1.05469	1.99539	0	0	0	0	0	0	0	0	0	0	0	0	0	0	0	0	0	0	0	0	0	0	0	0	0	0	0	0	0	0	0	0.139936	0	0	9.35228	0	0	0	0
alpha-Linolenic acid metabolism	g__Solirubrobacter	0.98488	0.542755	0.102913	0.194702	0	0	6.10039	0	3.74414	0	0	0	0	0	0	0	0	0	0	0	19.7019	0	0	0	0	0	0	0	0	0	0	0	0	0	0	0	0	0	0	0.591229	0	0.334984	0
alpha-Linolenic acid metabolism	g__Sporichthya	0.892734	0.491975	0	0	0	3.88893	0	0	13.8628	0	0	0.569548	0	0.217278	0	0.686212	0.934143	0	0	0.205637	2.43156	3.38332	0	0	0	0	0	0	0	0.27311	0	0	0.329506	0	0	0	0	0	0	0	0	0	0
alpha-Linolenic acid metabolism	g__Streptomyces	1.86493	1.02774	0.11385	0.215396	0	9.70109	20.6298	0	10.5146	0	0.146991	0	0	0	0.695301	0	0.858108	0	0	0	13.4019	0	0	0	0	0	0	0	0	0	0	0	0	0	0	0	0	0.265096	0	0	0	0.759557	0
alpha-Linolenic acid metabolism	g__Thermobifida	0.824779	0.454526	0.191682	0.362648	1.32645	0	13.995	0	0	0	0	0	0	0	0	0	0	0	0	0.382243	9.03968	0	0	0	0	0	0	0	0	0	0	0	0	0	0	0	0	0	0	0.452117	0.504532	0.768493	0
alpha-Linolenic acid metabolism	g__Treponema	0.898074	0.494917	0.0154998	0.0293244	0	0	0	0	0	0	0	0	0	0	0	0	0	0	0	0	0	0	0	0	0	0	0	0	0	0	26.9422	0	0	0	0	0	0	0	0	0	0	0	0.139498
alpha-Linolenic acid metabolism	g__Vibrio	10.9412	6.02957	0	0	44.0376	5.72683	0	9.28975	37.7356	2.16078	11.2664	26.3054	0	0.493342	0	71.0604	0	18.4391	1.33104	11.8274	0	6.96851	0	0	0	0	1.75177	0.105729	0.384605	60.881	0.18328	10.9683	4.09848	3.22092	0	0	0	0	0	0	0	0	0
alpha-Linolenic acid metabolism	g__Vitrella	1.26983	0.699789	0	0	0	0	0	0	0	0	0	0	0	0	36.3889	0	0	0	0	0	0	0	0	1.70609	0	0	0	0	0	0	0	0	0	0	0	0	0	0	0	0	0	0	0
alpha-Linolenic acid metabolism	g__Zeimonas	1.17159	0.645648	0	0	0	13.5179	0	0	9.73475	0	0	0	0	0.274639	5.71815	0	0	0	0	0	3.07349	2.13826	0	0	0	0	0	0	0	0.690422	0	0	0	0	0	0	0	0	0	0	0	0	0
