# Supplementary material
Source: Research Square preprint supplement (doi:10.21203/rs.3.rs-9409886/v1)
Supplement: Supplementary file 10 [file fef97f55aa116e89467a1932.xlsx]

## Sheet: Phylum
Phylum	FM_RPKM_Value	FM_Ratio (%)	FC_RPKM_Value	FM_Ratio (%)
p__Bacillota	7.2564e+06	70.0124	1.77449e+07	51.2832
p__Thermodesulfobacteriota	709350	6.84407	2.64892e+06	7.65545
p__Euryarchaeota	693939	6.69538	271786	0.785467
p__Pseudomonadota	387174	3.7356	4.67549e+06	13.5123
p__Bacteroidota	326907	3.15411	2.7428e+06	7.92676
p__Actinomycetota	268445	2.59005	1.73867e+06	5.02479
p__Uroviricota	137205	1.32381	1.24291e+06	3.59204
p__Verrucomicrobiota	88854.7	0.857302	101066	0.292082
p__Deferribacterota	87590.5	0.845105	66728.1	0.192846
p__Spirochaetota	77139.4	0.744269	282040	0.815101
p__Nitrososphaerota	67909	0.65521	419621	1.21271
p__Cyanobacteriota	34318.8	0.33112	33638.1	0.0972147
p__Mycoplasmatota	24614	0.237485	613114	1.77191
p__Synergistota	22677.8	0.218804	143944	0.416003
p__Fusobacteriota	18402.4	0.177553	313057	0.904741
p__unclassified_d__Viruses	13442.2	0.129695	96025.4	0.277515
p__Mucoromycota	10862.1	0.104801	58887.3	0.170185
p__unclassified_d__Archaea	9891.23	0.0954341	11273.2	0.0325797
p__Ascomycota	8171.31	0.0788397	17174	0.0496331
p__Campylobacterota	6853.95	0.0661294	25181.5	0.0727751
p__Zoopagomycota	6257.6	0.0603756	10441.1	0.0301751
p__Candidatus_Saccharibacteria	6032.78	0.0582064	30838	0.0891224
p__Oomycota	5386.14	0.0519674	8174.1	0.0236233
p__Chloroflexota	5141.55	0.0496076	27962.7	0.0808129
p__Basidiomycota	4526.33	0.0436717	17586.5	0.0508254
p__Acidobacteriota	4007.92	0.0386699	41073.3	0.118703
p__Candidatus_Melainabacteria	3573.52	0.0344786	19111.2	0.0552318
p__Candidatus_Omnitrophota	3348.95	0.0323119	12838.9	0.0371048
p__Thermotogota	3226.4	0.0311295	10481.8	0.0302925
p__Candidatus_Thermoplasmatota	3173.08	0.030615	10814.4	0.0312539
p__unclassified_d__Eukaryota	2845.37	0.0274531	29396.1	0.0849554
p__Platyhelminthes	2569.71	0.0247935	445.375	0.00128714
p__Planctomycetota	2506.11	0.0241798	136750	0.395211
p__unclassified_d__Bacteria	2300.33	0.0221944	13350.6	0.0385834
p__Candidatus_Bathyarchaeota	2102.6	0.0202866	10507.5	0.030367
p__Candidatus_Aminicenantota	2088	0.0201458	11536.1	0.0333396
p__Candidatus_Hydrothermota	2058.33	0.0198595	81.5249	0.00023561
p__Candidatus_Paceibacterota	1876.12	0.0181014	6416.64	0.0185442
p__Elusimicrobiota	1875.47	0.0180952	17233.5	0.0498052
p__Candidatus_Hydrogenedentota	1746.98	0.0168555	9913.32	0.0286497
p__Myxococcota	1662.96	0.0160449	14462.1	0.0417957
p__Streptophyta	1618.98	0.0156205	1384.37	0.00400086
p__Candidatus_Cloacimonadota	1596.93	0.0154078	9737.72	0.0281422
p__Candidatus_Neomarinimicrobiota	1560.38	0.0150551	7969.48	0.023032
p__Chytridiomycota	1538	0.0148392	15107.6	0.0436612
p__Microsporidia	1518.83	0.0146542	445523	1.28757
p__Ciliophora	1397.04	0.0134792	3948.51	0.0114113
p__Lentisphaerota	1253.4	0.0120932	5844.57	0.0168909
p__Candidatus_Methylomirabilota	1107.99	0.0106903	18068.7	0.0522189
p__Fibrobacterota	1094.9	0.010564	4878.74	0.0140997
p__Candidatus_Poribacteria	1088.01	0.0104975	5227.74	0.0151083
p__Candidatus_Rokuibacteriota	1087.05	0.0104883	8134.98	0.0235103
p__Rhodophyta	1086.58	0.0104837	4176.01	0.0120687
p__Nitrospirota	1038.35	0.0100184	14974.6	0.043277
p__Candidatus_Peregrinibacteria	1016.88	0.00981121	5134.04	0.0148375
p__Candidatus_Binatota	968.621	0.00934561	16326.6	0.0471842
p__Thermoproteota	932.828	0.00900027	14040.8	0.0405782
p__Candidatus_Dormiibacterota	921.297	0.00888901	15940.9	0.0460696
p__Nanoarchaeota	883.362	0.008523	2744.55	0.00793181
p__Candidatus_Rifleibacteriota	857.367	0.00827219	3499.06	0.0101124
p__Candidatus_Moduliflexota	849.369	0.00819502	3219.4	0.00930414
p__Bdellovibrionota	787.227	0.00759546	11102.9	0.0320876
p__Candidatus_Latescibacterota	752.844	0.00726371	4497.18	0.0129969
p__Chlamydiota	717.404	0.00692177	50553.2	0.1461
p__Aquificota	690.311	0.00666037	2952.01	0.00853138
p__Candidatus_Nomurabacteria	646.171	0.00623449	3821.75	0.0110449
p__Candidatus_Woesearchaeota	614.718	0.00593102	4579.87	0.0132359
p__Caldisericota	555.46	0.00535927	85.9892	0.00024851
p__Candidatus_Sumerlaeota	538.15	0.00519227	3165.84	0.00914936
p__Candidatus_Eiseniibacteriota	522.991	0.00504601	5286.83	0.015279
p__Gemmatimonadota	512.638	0.00494612	3363.57	0.0097208
p__Hofneiviricota	499.823	0.00482248	1166.37	0.00337083
p__Candidatus_Zixiibacteriota	482.465	0.00465499	6199.26	0.017916
p__Candidatus_Kapaibacteriota	468.969	0.00452479	1325.21	0.00382988
p__Candidatus_Aenigmatarchaeota	468.76	0.00452277	3508.24	0.0101389
p__Candidatus_Gottesmanbacteria	447.404	0.00431671	131.858	0.00038107
p__Candidatus_Nealsoniibacteriota	443.289	0.00427701	3846.18	0.0111156
p__Deinococcota	433.374	0.00418135	2219.07	0.00641317
p__Candidatus_Cryosericota	428.31	0.00413249	1080.91	0.00312385
p__Chlorobiota	425.258	0.00410304	1982.6	0.00572976
p__Candidatus_Deferrimicrobiota	384.687	0.0037116	23744.5	0.068622
p__Candidatus_Kaiserbacteria	352.067	0.00339687	1404.51	0.00405907
p__Candidatus_Parcubacteria	343.029	0.00330967	2617.01	0.00756322
p__Candidatus_Tectimicrobiota	324.224	0.00312823	6016.3	0.0173872
p__Candidatus_Krumholzibacteriota	320.422	0.00309154	1700.31	0.00491392
p__Candidatus_Moraniibacteriota	311.685	0.00300725	3011.38	0.00870294
p__Candidatus_Margulisiibacteriota	300.826	0.00290248	3395.54	0.00981317
p__Candidatus_Bipolaricaulota	293.523	0.00283202	1841.31	0.00532143
p__Candidatus_Micrarchaeota	291.337	0.00281092	1254.99	0.00362695
p__Candidatus_Delongiibacteriota	291.222	0.00280981	1522.89	0.00440119
p__Candidatus_Auribacterota	289.806	0.00279615	1068.05	0.00308668
p__Nematoda	280.887	0.0027101	3.9575	1.144e-05
p__Apicomplexa	265.67	0.00256328	2891.75	0.00835722
p__Thermomicrobiota	257.598	0.0024854	2105.07	0.00608369
p__Candidatus_Fermentibacteria	252.767	0.00243878	548.876	0.00158626
p__Arthropoda	250.352	0.00241549	3440.66	0.00994357
p__Candidatus_Walliibacteriota	242.876	0.00234336	488.888	0.0014129
p__Negarnaviricota	239.802	0.0023137	486.358	0.00140559
p__candidate_division_WOR-3	230.345	0.00222245	2390.27	0.00690794
p__Candidatus_Falkowbacteria	218.268	0.00210593	1279.58	0.003698
p__Preplasmiviricota	196.229	0.00189329	4288.89	0.012395
p__Evosea	190.414	0.00183718	6762.33	0.0195433
p__Ignavibacteriota	188.024	0.00181412	855.383	0.00247207
p__Preaxostyla	176.882	0.00170662	1355.17	0.00391647
p__Coprothermobacterota	173.619	0.00167514	718.259	0.00207578
p__Vulcanimicrobiota	158.954	0.00153364	1659.7	0.00479658
p__Rhodothermota	156.454	0.00150953	4394.44	0.0127
p__Candidatus_Aerophobetes	153.541	0.00148142	3341.74	0.0096577
p__Dictyoglomota	148.495	0.00143273	353.198	0.00102075
p__Candidatus_Woesebacteria	139.81	0.00134893	587.994	0.00169932
p__Candidatus_Diapherotrites	128.33	0.00123817	1374.34	0.00397186
p__Candidatus_Absconditabacteria	128.308	0.00123796	3924.85	0.0113429
p__Euglenozoa	122.115	0.00117821	947.473	0.00273822
p__Nucleocytoviricota	120.609	0.00116368	6309.53	0.0182347
p__Balneolota	118.957	0.00114774	1367.4	0.00395181
p__Candidatus_Lokiarchaeota	116.149	0.00112065	1337.04	0.00386407
p__Perkinsozoa	110.596	0.00106707	324.352	0.00093738
p__candidate_division_WWE3	110.49	0.00106604	679.744	0.00196447
p__Candidatus_Gracilibacteria	109.908	0.00106043	47217.6	0.13646
p__Candidatus_Goldiibacteriota	106.955	0.00103194	207.042	0.00059836
p__Candidatus_Muiribacteriota	106.095	0.00102365	153.428	0.00044341
p__Kiritimatiellota	104.674	0.00100994	939.823	0.00271611
p__Chrysiogenota	99.6908	0.00096185	785.926	0.00227134
p__candidate_division_FCPU426	99.0208	0.00095539	273.6	0.00079071
p__Atribacterota	96.6815	0.00093282	770.094	0.00222559
p__Candidatus_Sungiibacteriota	96.1942	0.00092812	445.934	0.00128876
p__Candidatus_Firestoneibacteriota	94.3103	0.00090994	60.332	0.00017436
p__Cossaviricota	93.0808	0.00089808	9093.09	0.0262792
p__Candidatus_Uhrbacteria	90.5302	0.00087347	822.85	0.00237805
p__Haptophyta	90.366	0.00087188	886.855	0.00256303
p__Nitrospinota	89.6353	0.00086483	1244.61	0.00359694
p__Candidatus_Hinthialibacterota	78.8509	0.00076078	357.171	0.00103223
p__Candidatus_Thorarchaeota	77.7594	0.00075025	1874.71	0.00541796
p__Candidatus_Altarchaeota	76.0828	0.00073407	450.428	0.00130175
p__Candidatus_Colwelliibacteriota	74.7874	0.00072158	88.509	0.00025579
p__Armatimonadota	74.0752	0.0007147	664.625	0.00192078
p__Candidatus_Lithacetigenota	71.9628	0.00069432	130.841	0.00037813
p__candidate_division_CSSED10-310	66.7402	0.00064393	546.304	0.00157883
p__Candidatus_Hadarchaeota	66.0116	0.0006369	61.249	0.00017701
p__Bacillariophyta	65.592	0.00063286	4608.92	0.0133199
p__Chlorophyta	64.2825	0.00062022	15.3841	4.446e-05
p__Candidatus_Daviesbacteria	62.6746	0.00060471	445.498	0.0012875
p__Candidatus_Roizmanbacteria	58.5022	0.00056445	308.974	0.00089294
p__Candidatus_Portnoyibacteriota	55.7401	0.0005378	58.0363	0.00016773
p__Calditrichota	54.1827	0.00052277	274.844	0.00079431
p__Candidatus_Magasanikiibacteriota	52.5341	0.00050687	262.958	0.00075996
p__Candidatus_Shapirobacteria	52.0588	0.00050228	899.723	0.00260022
p__Candidatus_Berkelbacteria	48.919	0.00047199	264.67	0.0007649
p__Candidatus_Doudnaibacteriota	48.6736	0.00046962	156.945	0.00045358
p__Blastocladiomycota	47.3271	0.00045663	1580.92	0.00456889
p__Discosea	45.9839	0.00044367	1040.59	0.00300732
p__Candidatus_Heimdallarchaeota	45.9821	0.00044365	1080.34	0.00312219
p__Phixviricota	41.9323	0.00040458	525.59	0.00151897
p__Heterolobosea	39.8675	0.00038466	428.269	0.00123771
p__Candidatus_Desantisbacteria	39.7469	0.00038349	1527.08	0.00441328
p__Candidatus_Gribaldobacteria	38.6317	0.00037273	211.757	0.00061198
p__Fornicata	38.2357	0.00036891	1379.91	0.00398798
p__candidate_division_CPR1	38.0502	0.00036712	267.482	0.00077303
p__Cryptomycota	33.8538	0.00032663	914.838	0.0026439
p__Candidatus_Yanofskyibacteriota	33.3443	0.00032172	144.241	0.00041686
p__Thermosulfidibacterota	29.8137	0.00028765	27.0811	7.826e-05
p__Candidatus_Calescamantes	29.6227	0.00028581	133.063	0.00038456
p__Candidatus_Caldatribacteriota	29.5091	0.00028471	245.089	0.00070831
p__Candidatus_Levyibacteriota	28.7938	0.00027781	126.045	0.00036427
p__Cressdnaviricota	28.683	0.00027674	1496.78	0.00432573
p__Candidatus_Staskawicziibacteriota	28.4731	0.00027472	217.878	0.00062967
p__Candidatus_Handelsmaniibacteriota	28.2573	0.00027264	362.809	0.00104852
p__Candidatus_Coatesiibacteriota	25.4123	0.00024519	125.749	0.00036342
p__Foraminifera	25.162	0.00024277	202.1	0.00058407
p__Candidatus_Azambacteria	25.0005	0.00024121	129.324	0.00037375
p__Cercozoa	24.3583	0.00023502	112.27	0.00032446
p__Parabasalia	22.5483	0.00021755	2148.38	0.00620887
p__Candidatus_Fervidibacterota	22.4301	0.00021641	72.2659	0.00020885
p__Candidatus_Schekmaniibacteriota	20.6602	0.00019934	247.478	0.00071522
p__Chordata	20.2714	0.00019559	412.2	0.00119127
p__Endomyxa	18.6854	0.00018028	368.743	0.00106568
p__Candidatus_Giovannonibacteria	18.3174	0.00017673	10.687	3.089e-05
p__Candidatus_Fischeribacteriota	17.6012	0.00016982	8.6822	2.509e-05
p__Artverviricota	17.1181	0.00016516	577.048	0.00166768
p__Mollusca	16.2014	0.00015632	36.8313	0.00010644
p__Candidatus_Edwardsiibacteriota	15.9081	0.00015349	274.841	0.0007943
p__Peploviricota	15.3435	0.00014804	35.6932	0.00010315
p__Candidatus_Lernaellota	15.0291	0.00014501	29.9202	8.647e-05
p__Candidatus_Curtissbacteria	14.8682	0.00014345	24.4745	7.073e-05
p__Candidatus_Mcinerneyibacteriota	13.9647	0.00013474	139.07	0.00040192
p__Candidatus_Marsarchaeota	13.7823	0.00013298	142.798	0.00041269
p__Candidatus_Wolfebacteria	13.1315	0.0001267	49.3515	0.00014263
p__Olpidiomycota	12.4315	0.00011994	144.83	0.00041856
p__Candidatus_Lloydiibacteriota	12.3789	0.00011944	48.8288	0.00014112
p__Candidatus_Tayloriibacteriota	12.3662	0.00011931	72.0244	0.00020815
p__Candidatus_Glassiibacteriota	12.3098	0.00011877	318.179	0.00091954
p__Candidatus_Ratteibacteria	12.0736	0.00011649	81.7446	0.00023624
p__Candidatus_Microgenomates	11.881	0.00011463	70.0717	0.00020251
p__Candidatus_Anderseniibacteriota	11.7786	0.00011364	0	0
p__Candidatus_Zambryskiibacteriota	10.9055	0.00010522	198.02	0.00057228
p__candidate_division_KD3-62	10.6052	0.00010232	112.134	0.00032407
p__Candidatus_Liptoniibacteriota	10.5911	0.00010219	77.1552	0.00022298
p__Candidatus_Electryoneota	9.155	8.833e-05	122.464	0.00035392
p__Thermodesulfobiota	8.6067	8.304e-05	6.2937	1.819e-05
p__Candidatus_Amesbacteria	8.5802	8.278e-05	37.333	0.00010789
p__Candidatus_Wildermuthiibacteriota	8.3653	8.071e-05	39.0219	0.00011277
p__Candidatus_Kryptoniota	8.3244	8.032e-05	219.437	0.00063418
p__Picozoa	8.0081	7.727e-05	26.6808	7.711e-05
p__Candidatus_Raymondiibacteriota	7.5034	7.24e-05	429.44	0.00124109
p__Candidatus_Buchananiibacteriota	7.4782	7.215e-05	48.4522	0.00014003
p__Candidatus_Hermodarchaeota	7.2456	6.991e-05	1.0919	3.16e-06
p__Candidatus_Effluviviacota	7.2125	6.959e-05	46.8548	0.00013541
p__Candidatus_Hydrothermarchaeota	7.1937	6.941e-05	0	0
p__Candidatus_Lindowiibacteriota	6.9281	6.684e-05	225.477	0.00065163
p__Candidatus_Yonathiibacteriota	6.3439	6.121e-05	3.3582	9.71e-06
p__Candidatus_Brockarchaeota	6.312	6.09e-05	12.3772	3.577e-05
p__Candidatus_Vogeliibacteriota	6.2474	6.028e-05	37.6394	0.00010878
p__Candidatus_Abawacaibacteriota	5.9791	5.769e-05	25.2605	7.3e-05
p__candidate_division_CPR2	5.7257	5.524e-05	9.0542	2.617e-05
p__Candidatus_Harrisoniibacteriota	5.4106	5.22e-05	45.92	0.00013271
p__Candidatus_Pyropristinus	5.3122	5.125e-05	0	0
p__Nebulidia	4.9747	4.8e-05	17.9457	5.186e-05
p__Candidatus_Helarchaeota	4.7079	4.542e-05	118.569	0.00034267
p__Candidatus_Kerfeldiibacteriota	4.5784	4.417e-05	106.18	0.00030686
p__Candidatus_Jacksoniibacteriota	4.4498	4.293e-05	0	0
p__Candidatus_Parvarchaeota	4.2972	4.146e-05	50.6435	0.00014636
p__Candidatus_Komeiliibacteriota	4.2931	4.142e-05	86.7829	0.0002508
p__Candidatus_Jorgensenbacteria	4.2885	4.138e-05	77.4412	0.00022381
p__Candidatus_Tharpellota	4.2269	4.078e-05	97.7989	0.00028264
p__Candidatus_Blackburniibacteriota	4.176	4.029e-05	22.7908	6.587e-05
p__Candidatus_Woykeibacteriota	3.0059	2.9e-05	0	0
p__Abditibacteriota	2.95	2.846e-05	25.2146	7.287e-05
p__Candidatus_Collierbacteria	2.6047	2.513e-05	121.86	0.00035218
p__Candidatus_Hodarchaeota	2.4779	2.391e-05	152.171	0.00043978
p__Candidatus_Campbellbacteria	2.3681	2.285e-05	25.4488	7.355e-05
p__Candidatus_Terryibacteriota	2.2439	2.165e-05	3.7541	1.085e-05
p__Candidatus_Elulimicrobiota	1.9775	1.908e-05	37.3478	0.00010794
p__Candidatus_Culexarchaeota	1.9646	1.895e-05	6.0909	1.76e-05
p__Candidatus_Beckwithbacteria	1.8014	1.738e-05	86.0207	0.0002486
p__Tubulinea	1.6427	1.585e-05	0	0
p__Halobacteriota	1.4026	1.353e-05	726.71	0.00210021
p__unclassified_k__Heunggongvirae	0.9924	9.57e-06	169.017	0.00048846
p__Candidatus_Ryaniibacteriota	0.9086	8.77e-06	351.166	0.00101488
p__Candidatus_Borrarchaeota	0	0	15.0283	4.343e-05
p__Candidatus_Chisholmiibacteriota	0	0	22.5637	6.521e-05
p__Candidatus_Niyogiibacteriota	0	0	15.5385	4.491e-05
p__Candidatus_Odinarchaeota	0	0	2.4468	7.07e-06
p__Candidatus_Nezhaarchaeota	0	0	13.2446	3.828e-05
p__Candidatus_Methanomethylicota	0	0	136.512	0.00039452
p__Candidatus_Kuenenbacteria	0	0	34.8614	0.00010075
p__Candidatus_Geothermarchaeota	0	0	7.855	2.27e-05
p__Candidatus_Gerdarchaeota	0	0	17.381	5.023e-05
p__Candidatus_Fraseribacteriota	0	0	8.0272	2.32e-05
p__Candidatus_Blackallbacteria	0	0	48.6167	0.0001405
p__Cnidaria	0	0	83.0084	0.0002399
p__Candidatus_Spechtiibacteriota	0	0	7.298	2.109e-05
p__Candidatus_Wirthbacteria	0	0	45.869	0.00013256
p__Kitrinoviricota	0	0	23.0392	6.658e-05
p__Rotifera	0	0	5.1348	1.484e-05
p__candidate_division_LCP-89	0	0	139.879	0.00040425
p__unclassified_k__Fungi	0	0	22.8266	6.597e-05
Total Classified (Sum)	1.03645e+07	100	3.46018e+07	100

## Sheet: Class
Class	FM_RPKM_Value	FM_Ratio (%)	FC_RPKM_Value	FC_Ratio (%)
c__Clostridia	5.06743e+06	48.8924	1.08713e+07	31.4182
c__Erysipelotrichia	1.48468e+06	14.3247	5.53587e+06	15.9988
c__Desulfovibrionia	686917	6.62762	2.553e+06	7.37823
c__Methanobacteria	677345	6.53527	239913	0.693355
c__unclassified_p__Bacillota	371442	3.5838	140570	0.40625
c__Bacteroidia	306656	2.95873	2.53716e+06	7.33245
c__Gammaproteobacteria	274467	2.64816	1.84286e+06	5.32591
c__Bacilli	224716	2.16814	834443	2.41156
c__Actinomycetes	189932	1.83254	1.28818e+06	3.72288
c__Caudoviricetes	137205	1.32381	1.24291e+06	3.59204
c__Deferribacteres	87590.5	0.845105	66728.1	0.192846
c__Verrucomicrobiia	85509.4	0.825025	88191.1	0.254874
c__Alphaproteobacteria	77468.4	0.747443	2.68948e+06	7.77264
c__Spirochaetia	77139.4	0.744269	282040	0.815101
c__Nitrososphaeria	66656.1	0.643122	405841	1.17289
c__Tissierellia	57599.1	0.555737	214880	0.621008
c__Coriobacteriia	54181.6	0.522763	139116	0.402048
c__Negativicutes	47844.2	0.461618	140916	0.407252
c__Betaproteobacteria	34340.4	0.331328	139720	0.403795
c__Cyanophyceae	33782.6	0.325947	30935.6	0.0894045
c__Synergistia	22554.8	0.217617	143326	0.414215
c__Fusobacteriia	18402.4	0.177553	313057	0.904741
c__Thermoleophilia	15785.5	0.152304	216894	0.62683
c__unclassified_d__Viruses	13212.2	0.127476	91551	0.264584
c__unclassified_p__Mycoplasmatota	12301.3	0.118687	427663	1.23596
c__Mollicutes	11969.7	0.115488	183123	0.529229
c__Flavobacteriia	10215	0.0985577	113978	0.329399
c__unclassified_d__Archaea	9883.83	0.0953628	9508.27	0.0274791
c__unclassified_p__Euryarchaeota	7714.7	0.0744342	2145.11	0.00619942
c__Methanomicrobia	6918.55	0.0667527	26050.4	0.0752861
c__Epsilonproteobacteria	6734.31	0.0649751	24974.9	0.072178
c__Desulfobacteria	6630.15	0.0639701	30523.3	0.088213
c__Dothideomycetes	6556.72	0.0632616	2531.02	0.0073147
c__Glomeromycetes	6036.47	0.058242	33411.5	0.0965599
c__unclassified_p__Oomycota	5386.14	0.0519674	8174.1	0.0236233
c__Basidiobolomycetes	5210.04	0.0502683	762.594	0.00220391
c__Desulfobulbia	5107.39	0.049278	24893.6	0.071943
c__Acidimicrobiia	5087.5	0.049086	78308.1	0.226312
c__unclassified_p__Candidatus_Saccharibacteria	4293.12	0.0414215	17539.1	0.0506883
c__Agaricomycetes	4080.43	0.0393694	14440.9	0.0417346
c__Cytophagia	3943.84	0.0380516	31237.6	0.0902774
c__Desulfarculia	3828.3	0.0369368	12782.4	0.0369415
c__Desulfuromonadia	3723.36	0.0359244	13499.4	0.0390137
c__unclassified_p__Candidatus_Melainabacteria	3503.65	0.0338045	17190.1	0.0496797
c__Anaerolineae	3453.29	0.0333186	12795.7	0.0369798
c__Mucoromycetes	3362.04	0.0324382	21194.4	0.0612522
c__unclassified_p__Candidatus_Omnitrophota	3348.95	0.0323119	12838.9	0.0371048
c__Terriglobia	3337.67	0.0322031	37324.6	0.107869
c__Thermotogae	3226.4	0.0311295	10481.8	0.0302925
c__Thermoplasmata	3058.98	0.0295142	9278.18	0.0268141
c__Rubrobacteria	3051.96	0.0294464	12391.1	0.0358104
c__Sphingobacteriia	2715.93	0.0262043	18853.7	0.0544877
c__Trematoda	2562.49	0.0247239	358.898	0.00103722
c__Chitinophagia	2453.01	0.0236675	36638.5	0.105886
c__unclassified_p__Candidatus_Aminicenantota	2087.16	0.0201376	11499.8	0.0332348
c__Candidatus_Hydrothermia	2007.46	0.0193687	14.3829	4.157e-05
c__unclassified_p__Candidatus_Paceibacterota	1872.97	0.0180711	6406.99	0.0185163
c__Candidatus_Bathyarchaeia	1787.77	0.017249	3377.31	0.00976049
c__Candidatus_Saccharimonadia	1725.46	0.0166479	13037.7	0.0376792
c__Culicoidibacteria	1707.44	0.016474	1885.71	0.00544975
c__Endomicrobiia	1656.68	0.0159843	15716.9	0.0454222
c__Planctomycetia	1578.46	0.0152295	130449	0.377
c__unclassified_p__Candidatus_Hydrogenedentota	1564.33	0.0150933	9523.24	0.0275224
c__unclassified_p__Candidatus_Neomarinimicrobiota	1560.38	0.0150551	7969.48	0.023032
c__unclassified_d__Bacteria	1521.94	0.0146842	7818.61	0.022596
c__unclassified_p__Microsporidia	1518.83	0.0146542	445523	1.28757
c__Terrimicrobiia	1439.22	0.0138861	4732.48	0.013677
c__Eustigmatophyceae	1385.83	0.013371	815.338	0.00235634
c__unclassified_p__Candidatus_Cloacimonadota	1366.79	0.0131872	7319.96	0.0211548
c__Methanococci	1354.7	0.0130706	556.557	0.00160846
c__Chytridiomycetes	1254.35	0.0121024	10079.1	0.0291288
c__unclassified_p__Nitrososphaerota	1247.07	0.0120322	13642.6	0.0394275
c__Myxococcia	1221.67	0.0117871	7851.27	0.0226903
c__Lentisphaeria	1143.51	0.011033	5419.69	0.015663
c__unclassified_p__Candidatus_Poribacteria	1088.01	0.0104975	5227.74	0.0151083
c__Fibrobacteria	1087.88	0.0104962	4801.64	0.0138768
c__unclassified_p__Candidatus_Rokuibacteriota	1087.05	0.0104883	8134.98	0.0235103
c__Umbelopsidomycetes	1079.96	0.0104199	601.154	0.00173735
c__Spartobacteria	1048.48	0.0101161	4886.33	0.0141216
c__Syntrophia	1006.88	0.00971479	4248.16	0.0122773
c__Thermodesulfobacteria	992.241	0.0095735	1064.79	0.00307727
c__Florideophyceae	991.716	0.00956843	3169.44	0.00915975
c__unclassified_p__Candidatus_Methylomirabilota	938.334	0.00905339	15058.2	0.0435185
c__Candidatus_Binatia	936.522	0.0090359	15912	0.045986
c__Charophyceae	925.504	0.0089296	940.025	0.00271669
c__unclassified_p__Candidatus_Dormiibacterota	910.938	0.00878906	15583.3	0.0450362
c__Saprospiria	861.872	0.00831565	3871.21	0.0111879
c__unclassified_p__Candidatus_Rifleibacteriota	857.367	0.00827219	3499.06	0.0101124
c__Candidatus_Peribacteria	846.634	0.00816863	3457.58	0.00999248
c__Nitrospiria	841.321	0.00811737	12775.1	0.0369203
c__unclassified_p__Nanoarchaeota	819.185	0.00790379	1871.53	0.00540875
c__Opitutia	782.309	0.007548	2818.58	0.00814575
c__Acidithiobacillia	763.772	0.00736915	2259.45	0.00652985
c__unclassified_p__Candidatus_Latescibacterota	752.844	0.00726371	4497.18	0.0129969
c__Chlamydiia	717.404	0.00692177	50553.2	0.1461
c__Dethiobacteria	703.576	0.00678835	2655.12	0.00767335
c__Aquificia	690.311	0.00666037	2952.01	0.00853138
c__unclassified_p__Thermoproteota	680.522	0.00656592	12400.4	0.0358373
c__Candidatus_Vecturitrichia	680.413	0.00656487	2617.15	0.00756361
c__Sordariomycetes	660.287	0.00637069	3538.78	0.0102272
c__unclassified_p__Candidatus_Nomurabacteria	646.171	0.00623449	3821.75	0.0110449
c__Spirotrichea	644.568	0.00621902	1048.49	0.00303015
c__Syntrophobacteria	634.942	0.00612615	2085.96	0.00602846
c__unclassified_p__Candidatus_Woesearchaeota	614.718	0.00593102	4579.87	0.0132359
c__Candidatus_Brocadiia	582.44	0.00561959	3671.47	0.0106106
c__Caldisericia	555.46	0.00535927	85.9892	0.00024851
c__unclassified_p__Cyanobacteriota	536.109	0.00517257	2702.47	0.00781018
c__Deltaproteobacteria	526.82	0.00508295	5441.42	0.0157258
c__unclassified_p__Candidatus_Eiseniibacteriota	522.991	0.00504601	5286.83	0.015279
c__Faserviricetes	499.823	0.00482248	1166.37	0.00337083
c__Chloroflexia	488.563	0.00471383	2018.89	0.00583463
c__unclassified_p__Candidatus_Zixiibacteriota	482.465	0.00465499	6199.26	0.017916
c__unclassified_p__Candidatus_Kapaibacteriota	468.969	0.00452479	1325.21	0.00382988
c__unclassified_p__Candidatus_Aenigmatarchaeota	468.76	0.00452277	3508.24	0.0101389
c__unclassified_p__Candidatus_Gottesmanbacteria	447.404	0.00431671	131.858	0.00038107
c__unclassified_p__Candidatus_Nealsoniibacteriota	443.289	0.00427701	3846.18	0.0111156
c__unclassified_p__Myxococcota	441.292	0.00425775	6610.79	0.0191053
c__Holophagae	435.406	0.00420095	1628.82	0.00470733
c__Deinococci	433.374	0.00418135	2219.07	0.00641317
c__Candidatus_Cryosericia	428.31	0.00413249	1080.91	0.00312385
c__Chlorobiia	425.258	0.00410304	1982.6	0.00572976
c__Harpellomycetes	421.362	0.00406545	3627.78	0.0104843
c__unclassified_p__Candidatus_Sumerlaeota	410.497	0.00396063	2521.11	0.00728607
c__Candidatus_Deferrimicrobia	384.687	0.0037116	23744.5	0.068622
c__Longimicrobiia	374.939	0.00361755	2059.31	0.00595146
c__Dehalococcoidia	368.499	0.00355541	1087.44	0.00314271
c__unclassified_p__Candidatus_Kaiserbacteria	352.067	0.00339687	1404.51	0.00405907
c__Caldilineae	347.955	0.0033572	7189.93	0.020779
c__unclassified_p__Candidatus_Parcubacteria	343.029	0.00330967	2617.01	0.00756322
c__Candidatus_Izimaplasma	343.015	0.00330954	2327.33	0.00672602
c__Bdellovibrionia	342.494	0.0033045	8956.01	0.0258831
c__Bacteriovoracia	337.638	0.00325765	1518.34	0.00438803
c__Mortierellomycetes	333.186	0.0032147	3298.37	0.00953235
c__Chlorokybophyceae	326.44	0.00314961	172.473	0.00049845
c__unclassified_p__Candidatus_Bathyarchaeota	314.826	0.00303755	7130.23	0.0206065
c__unclassified_p__Candidatus_Moraniibacteriota	311.685	0.00300725	3011.38	0.00870294
c__Phycisphaerae	296.344	0.00285924	2565.78	0.00741515
c__unclassified_p__Candidatus_Delongiibacteriota	291.222	0.00280981	1522.89	0.00440119
c__unclassified_p__Candidatus_Bipolaricaulota	289.44	0.00279262	1595.53	0.00461113
c__Armophorea	288.329	0.00278191	0	0
c__unclassified_p__Candidatus_Micrarchaeota	286.237	0.00276172	970.906	0.00280594
c__Chromadorea	280.887	0.0027101	3.9575	1.144e-05
c__Eurotiomycetes	273.667	0.00264044	1665.79	0.00481416
c__Neocallimastigomycetes	272.411	0.00262832	4310.95	0.0124587
c__Filasterea	269.147	0.00259682	6830.63	0.0197407
c__Magnoliopsida	266.656	0.0025728	140.391	0.00040573
c__Thermomicrobia	257.598	0.0024854	2105.07	0.00608369
c__Dinophyceae	255.78	0.00246786	2271.75	0.0065654
c__unclassified_p__Candidatus_Margulisiibacteriota	253.061	0.00244163	1958.48	0.00566006
c__Conoidasida	252.948	0.00244054	1906	0.00550839
c__Thermoprotei	252.307	0.00243435	1640.43	0.00474087
c__unclassified_p__Candidatus_Walliibacteriota	242.876	0.00234336	488.888	0.0014129
c__Ktedonobacteria	239.641	0.00231215	1192.18	0.00344544
c__Oligohymenophorea	238.715	0.00230321	2306.92	0.00666706
c__Ellioviricetes	235.372	0.00227095	61.2098	0.0001769
c__Tremellomycetes	234.549	0.00226301	337.309	0.00097483
c__unclassified_d__Eukaryota	231.738	0.00223589	4554.31	0.013162
c__unclassified_p__candidate_division_WOR-3	230.345	0.00222245	2390.27	0.00690794
c__Candidatus_Cloacimonadia	230.147	0.00222054	2417.75	0.00698736
c__Naldaviricetes	229.966	0.0022188	4474.39	0.0129311
c__Heterotrichea	222.29	0.00214473	593.099	0.00171407
c__Entomophthoromycetes	221.089	0.00213314	898.263	0.002596
c__Candidatus_Babeliae	219.263	0.00211553	23.7454	6.862e-05
c__Elusimicrobia	218.784	0.0021109	1516.61	0.00438303
c__unclassified_p__Candidatus_Auribacterota	218.306	0.0021063	906.11	0.00261868
c__unclassified_p__Candidatus_Falkowbacteria	218.268	0.00210593	1279.58	0.003698
c__Candidatus_Aquicultoria	215.034	0.00207473	531.378	0.00153569
c__Choanoflagellata	212.027	0.00204572	8496.13	0.024554
c__Candidatus_Krumholzibacteriia	206.968	0.0019969	1607.28	0.00464507
c__Candidatus_Methanofastidiosia	205.12	0.00197907	755.576	0.00218363
c__Syntrophorhabdia	198.037	0.00191073	2868.26	0.00828934
c__Thermodesulfovibrionia	197.033	0.00190105	2199.54	0.00635672
c__Desulfuribacillia	196.637	0.00189723	1425.65	0.00412017
c__Blastocatellia	195.65	0.00188771	613.959	0.00177436
c__unclassified_p__Candidatus_Tectimicrobiota	195.235	0.0018837	2520.36	0.0072839
c__Ignavibacteria	188.024	0.00181412	855.383	0.00247207
c__unclassified_p__Candidatus_Fermentibacteria	178.14	0.00171876	365.435	0.00105612
c__unclassified_p__Preaxostyla	176.882	0.00170662	1355.17	0.00391647
c__Coprothermobacteria	173.619	0.00167514	718.259	0.00207578
c__Insecta	171.604	0.0016557	2821.82	0.00815512
c__unclassified_p__Candidatus_Peregrinibacteria	170.244	0.00164258	1676.46	0.004845
c__Candidatus_Methylomirabilia	169.656	0.0016369	3010.48	0.00870035
c__Candidatus_Moduliflexia	168.956	0.00163015	602.255	0.00174053
c__Halobacteria	166.034	0.00160195	992.086	0.00286715
c__Polintoviricetes	165.594	0.00159771	3490.63	0.010088
c__Kickxellomycetes	160.578	0.00154932	2869.83	0.00829387
c__Vulcanimicrobiia	158.954	0.00153364	1659.7	0.00479658
c__Rhodothermia	156.454	0.00150953	4394.44	0.0127
c__unclassified_p__Candidatus_Aerophobetes	153.541	0.00148142	3341.74	0.0096577
c__Dictyoglomia	148.495	0.00143273	353.198	0.00102075
c__Leotiomycetes	147.166	0.00141991	1132.07	0.00327171
c__Lecanoromycetes	142.301	0.00137297	246.914	0.00071359
c__Desulfomonilia	140.376	0.0013544	976.543	0.00282223
c__unclassified_p__Candidatus_Woesebacteria	139.81	0.00134893	587.994	0.00169932
c__Gemmatimonadia	137.699	0.00132857	1304.26	0.00376934
c__Candidatus_Entotheonellia	128.989	0.00124453	3495.94	0.0101033
c__unclassified_p__Candidatus_Diapherotrites	128.33	0.00123817	1374.34	0.00397186
c__unclassified_p__Candidatus_Absconditabacteria	128.308	0.00123796	3924.85	0.0113429
c__Candidatus_Sumerlaeia	127.653	0.00123165	644.73	0.00186328
c__Zoopagomycetes	127.504	0.00123021	1605.53	0.00464003
c__Eumycetozoa	125.415	0.00121005	2212.03	0.00639281
c__Thermococci	123.737	0.00119386	593.634	0.00171561
c__unclassified_p__Synergistota	123.001	0.00118676	618.722	0.00178812
c__Desulfurellia	119.643	0.00115436	206.615	0.00059712
c__Balneolia	118.957	0.00114774	1367.4	0.00395181
c__Dimargaritomycetes	117.029	0.00112914	579.358	0.00167436
c__Megaviricetes	115.662	0.00111594	6150.62	0.0177754
c__Nitriliruptoria	115.281	0.00111228	2404.39	0.00694874
c__unclassified_p__Candidatus_Krumholzibacteriota	113.454	0.00109465	93.0275	0.00026885
c__unclassified_p__Candidatus_Lokiarchaeota	111.378	0.00107462	789.847	0.00228267
c__unclassified_p__Perkinsozoa	110.596	0.00106707	324.352	0.00093738
c__unclassified_p__candidate_division_WWE3	110.49	0.00106604	679.744	0.00196447
c__unclassified_p__Candidatus_Gracilibacteria	109.908	0.00106043	47217.6	0.13646
c__Oligosphaeria	109.887	0.00106023	424.88	0.00122791
c__Pichiomycetes	109.466	0.00105616	1932.39	0.00558464
c__Candidatus_Hydrogenedentia	109.265	0.00105422	223.576	0.00064614
c__Oligoflexia	107.096	0.0010333	628.529	0.00181646
c__unclassified_p__Candidatus_Goldiibacteriota	106.955	0.00103194	207.042	0.00059836
c__unclassified_p__Candidatus_Muiribacteriota	106.095	0.00102365	153.428	0.00044341
c__Cryptophyceae	105.946	0.0010222	1028.15	0.00297137
c__Kiritimatiellia	104.674	0.00100994	808.082	0.00233537
c__Ardenticatenia	103.462	0.00099824	2757.96	0.00797055
c__Saccharomycetes	100.007	0.0009649	2830.48	0.00818013
c__Chrysiogenia	99.6908	0.00096185	785.926	0.00227134
c__unclassified_p__candidate_division_FCPU426	99.0208	0.00095539	273.6	0.00079071
c__Archaeoglobi	98.1769	0.00094725	531.575	0.00153626
c__Mesostigmatophyceae	96.2726	0.00092887	24.1751	6.987e-05
c__unclassified_p__Candidatus_Sungiibacteriota	96.1942	0.00092812	445.934	0.00128876
c__Deferrisomatia	94.5803	0.00091255	115.66	0.00033426
c__unclassified_p__Candidatus_Firestoneibacteriota	94.3103	0.00090994	60.332	0.00017436
c__Atribacteria	93.4534	0.00090167	760.236	0.0021971
c__Quintoviricetes	93.0808	0.00089808	9093.09	0.0262792
c__unclassified_p__Candidatus_Uhrbacteria	90.5302	0.00087347	822.85	0.00237805
c__unclassified_p__Haptophyta	90.366	0.00087188	886.855	0.00256303
c__Nitrospinia	89.6353	0.00086483	1244.61	0.00359694
c__Euglenida	84.6032	0.00081628	144.253	0.0004169
c__Phaeophyceae	79.0042	0.00076226	525.002	0.00151727
c__unclassified_p__Candidatus_Thorarchaeota	77.7594	0.00075025	1874.71	0.00541796
c__unclassified_p__Candidatus_Thermoplasmatota	76.23	0.00073549	1140.21	0.00329522
c__Methylacidiphilae	75.2799	0.00072633	211.355	0.00061082
c__unclassified_p__Candidatus_Colwelliibacteriota	74.7874	0.00072158	88.509	0.00025579
c__Candidatus_Fermentibacteria_(class)	74.6265	0.00072002	183.44	0.00053015
c__Zetaproteobacteria	73.942	0.00071342	444.168	0.00128365
c__Aphelidea	73.5245	0.00070939	454.678	0.00131403
c__Candidatus_Abyssobacteria	73.3834	0.00070803	166.504	0.0004812
c__Arachnida	72.5846	0.00070032	48.5497	0.00014031
c__unclassified_p__Candidatus_Lithacetigenota	71.9628	0.00069432	130.841	0.00037813
c__Pucciniomycetes	71.0935	0.00068594	682.409	0.00197218
c__Ustilaginomycetes	70.6438	0.0006816	259.002	0.00074852
c__Vampirovibriophyceae	69.8689	0.00067412	1921.14	0.00555213
c__Bangiophyceae	69.5739	0.00067127	901.684	0.00260589
c__unclassified_p__candidate_division_CSSED10-310	66.7402	0.00064393	546.304	0.00157883
c__Pezizomycetes	66.2148	0.00063886	402.546	0.00116337
c__Candidatus_Hadarchaeia	66.0116	0.0006369	61.249	0.00017701
c__Trebouxiophyceae	64.2825	0.00062022	15.3841	4.446e-05
c__Candidatus_Nanoarchaeia	64.1772	0.00061921	873.022	0.00252305
c__Limnochordia	63.5197	0.00061286	461.709	0.00133435
c__unclassified_p__Candidatus_Daviesbacteria	62.6746	0.00060471	445.498	0.0012875
c__unclassified_p__Bacteroidota	61.1906	0.00059039	1061.43	0.00306757
c__Hydrogenophilia	60.6881	0.00058554	728.348	0.00210494
c__Candidatus_Thermofonsia	58.7664	0.000567	347.355	0.00100386
c__unclassified_p__Candidatus_Roizmanbacteria	58.5022	0.00056445	308.974	0.00089294
c__unclassified_p__Candidatus_Portnoyibacteriota	55.7401	0.0005378	58.0363	0.00016773
c__Calditrichia	54.1827	0.00052277	274.844	0.00079431
c__unclassified_p__Candidatus_Magasanikiibacteriota	52.5341	0.00050687	262.958	0.00075996
c__unclassified_p__Candidatus_Shapirobacteria	52.0588	0.00050228	899.723	0.00260022
c__unclassified_p__Candidatus_Hydrothermota	50.873	0.00049084	67.1419	0.00019404
c__Endogonomycetes	50.401	0.00048629	381.881	0.00110364
c__unclassified_p__Candidatus_Berkelbacteria	48.919	0.00047199	264.67	0.0007649
c__Candidatus_Uabimicrobiia	48.8637	0.00047145	64.0711	0.00018517
c__unclassified_p__Candidatus_Doudnaibacteriota	48.6736	0.00046962	156.945	0.00045358
c__Candidatus_Hinthialibacteria	47.6881	0.00046011	281.786	0.00081437
c__Ichthyosporea	47.0728	0.00045418	1689.51	0.00488273
c__unclassified_p__Discosea	45.9839	0.00044367	1040.59	0.00300732
c__unclassified_p__Candidatus_Heimdallarchaeota	45.9821	0.00044365	1080.34	0.00312219
c__Dissulfuribacteria	42.9378	0.00041428	230.478	0.00066609
c__Malgrandaviricetes	41.9323	0.00040458	525.59	0.00151897
c__Bigyra	40.2381	0.00038823	988.11	0.00285566
c__unclassified_p__Candidatus_Altarchaeota	40.0675	0.00038659	65.1864	0.00018839
c__unclassified_p__Heterolobosea	39.8675	0.00038466	428.269	0.00123771
c__unclassified_p__Candidatus_Desantisbacteria	39.7469	0.00038349	1527.08	0.00441328
c__unclassified_p__Candidatus_Gribaldobacteria	38.6317	0.00037273	211.757	0.00061198
c__unclassified_p__Fornicata	38.2357	0.00036891	1379.91	0.00398798
c__unclassified_p__candidate_division_CPR1	38.0502	0.00036712	267.482	0.00077303
c__Candidatus_Poseidoniia	37.8673	0.00036536	396.023	0.00114452
c__Candidatus_Ancaeobacteria	37.405	0.0003609	23.8356	6.889e-05
c__Xanthophyceae	36.7018	0.00035411	116.982	0.00033808
c__Pelagophyceae	36.4466	0.00035165	269.177	0.00077793
c__Candidatus_Altiarchaeia	36.0153	0.00034749	385.242	0.00111336
c__Bacillariophyceae	34.7615	0.00033539	2474.83	0.0071523
c__unclassified_p__Evosea	33.9028	0.00032711	3820.63	0.0110417
c__unclassified_p__Cryptomycota	33.8538	0.00032663	914.838	0.0026439
c__unclassified_p__Candidatus_Yanofskyibacteriota	33.3443	0.00032172	144.241	0.00041686
c__Candidatus_Termititenacia	33.1079	0.00031944	1358.51	0.00392613
c__Candidatus_Geothermincolia	32.9148	0.00031757	442.055	0.00127755
c__Candidatus_Ozemobacteria	32.3124	0.00031176	66.777	0.00019299
c__unclassified_p__Candidatus_Binatota	32.0993	0.00030971	414.605	0.00119822
c__Fimbriimonadia	31.8667	0.00030746	497.839	0.00143876
c__Tepidiformia	31.7618	0.00030645	253.077	0.0007314
c__unclassified_p__Candidatus_Hinthialibacterota	31.1628	0.00030067	75.3853	0.00021787
c__Variosea	31.0958	0.00030002	729.672	0.00210877
c__Vicinamibacteria	30.6829	0.00029604	735.354	0.00212519
c__Tectiliviricetes	30.6343	0.00029557	761.65	0.00220118
c__Microbotryomycetes	30.1857	0.00029124	554.25	0.00160179
c__Thermosulfidibacteria	29.8137	0.00028765	27.0811	7.826e-05
c__unclassified_p__Candidatus_Calescamantes	29.6227	0.00028581	133.063	0.00038456
c__unclassified_p__Candidatus_Caldatribacteriota	29.5091	0.00028471	245.089	0.00070831
c__unclassified_p__Candidatus_Levyibacteriota	28.7938	0.00027781	126.045	0.00036427
c__unclassified_p__Candidatus_Staskawicziibacteriota	28.4731	0.00027472	217.878	0.00062967
c__unclassified_p__Candidatus_Handelsmaniibacteriota	28.2573	0.00027264	362.809	0.00104852
c__Blastocladiomycetes	26.6404	0.00025704	891.395	0.00257615
c__Coscinodiscophyceae	26.1223	0.00025204	1816.63	0.00525009
c__Desulfobaccia	26.0686	0.00025152	2473.98	0.00714985
c__Exobasidiomycetes	25.8361	0.00024928	987.355	0.00285348
c__unclassified_p__Candidatus_Coatesiibacteriota	25.4123	0.00024519	125.749	0.00036342
c__unclassified_p__Foraminifera	25.162	0.00024277	202.1	0.00058407
c__unclassified_p__Candidatus_Azambacteria	25.0005	0.00024121	129.324	0.00037375
c__Chlorarachniophyceae	24.3583	0.00023502	99.6196	0.0002879
c__unclassified_p__Actinomycetota	22.8182	0.00022016	340.322	0.00098354
c__unclassified_p__Parabasalia	22.5483	0.00021755	2148.38	0.00620887
c__Candelariomycetes	22.4341	0.00021645	48.7642	0.00014093
c__unclassified_p__Candidatus_Fervidibacterota	22.4301	0.00021641	72.2659	0.00020885
c__Centroplasthelida	21.7713	0.00021006	261.348	0.0007553
c__Kinetoplastea	21.4151	0.00020662	217.117	0.00062747
c__Orbiliomycetes	21.1669	0.00020423	403.002	0.00116468
c__Thermoflexia	20.783	0.00020052	168.51	0.000487
c__Physodermatomycetes	20.6867	0.00019959	689.523	0.00199274
c__unclassified_p__Candidatus_Schekmaniibacteriota	20.6602	0.00019934	247.478	0.00071522
c__Candidatus_Humimicrobiia	19.7512	0.00019057	57.2965	0.00016559
c__Candidatus_Erginobacteria	19.5331	0.00018846	54.9996	0.00015895
c__Phytomyxea	18.6854	0.00018028	368.743	0.00106568
c__unclassified_p__Candidatus_Giovannonibacteria	18.3174	0.00017673	10.687	3.089e-05
c__Bolidophyceae	17.7422	0.00017118	463.29	0.00133892
c__unclassified_p__Candidatus_Fischeribacteriota	17.6012	0.00016982	8.6822	2.509e-05
c__Revtraviricetes	17.1181	0.00016516	577.048	0.00166768
c__Candidatus_Fermentithermobacillia	16.6089	0.00016025	548.135	0.00158412
c__Candidatus_Limnocylindria	16.2488	0.00015677	129.256	0.00037355
c__Diplonemea	16.097	0.00015531	586.103	0.00169385
c__unclassified_p__Ascomycota	15.9697	0.00015408	167.506	0.0004841
c__unclassified_p__Candidatus_Edwardsiibacteriota	15.9081	0.00015349	274.841	0.0007943
c__Rhodellophyceae	15.6977	0.00015146	14.1207	4.081e-05
c__Chthonomonadia	15.6601	0.00015109	52.6714	0.00015222
c__Schizosaccharomycetes	15.5736	0.00015026	371.998	0.00107508
c__Raphidophyceae	15.4721	0.00014928	30.8826	8.925e-05
c__Herviviricetes	15.3435	0.00014804	35.6932	0.00010315
c__unclassified_p__Cressdnaviricota	15.1774	0.00014644	1496.78	0.00432573
c__Candidatus_Lernaellaia	15.0291	0.00014501	29.9202	8.647e-05
c__unclassified_p__Candidatus_Curtissbacteria	14.8682	0.00014345	24.4745	7.073e-05
c__Armatimonadia	14.7194	0.00014202	70.8902	0.00020487
c__Candidatus_Marinamargulisbacteria	14.6569	0.00014141	78.5409	0.00022698
c__Candidatus_Auribacteria	14.5615	0.00014049	63.7551	0.00018425
c__Candidatus_Mcinerneyibacteria	13.9647	0.00013474	137.752	0.00039811
c__unclassified_p__Candidatus_Marsarchaeota	13.7823	0.00013298	142.798	0.00041269
c__Arfiviricetes	13.5056	0.00013031	0	0
c__unclassified_p__Candidatus_Wolfebacteria	13.1315	0.0001267	49.3515	0.00014263
c__Actinopteri	12.9487	0.00012493	333.667	0.00096431
c__Aconoidasida	12.7218	0.00012274	985.75	0.00284884
c__unclassified_p__Chloroflexota	12.5793	0.00012137	22.4422	6.486e-05
c__Olpidiomycetes	12.4315	0.00011994	144.83	0.00041856
c__unclassified_p__Candidatus_Lloydiibacteriota	12.3789	0.00011944	48.8288	0.00014112
c__unclassified_p__Candidatus_Tayloriibacteriota	12.3662	0.00011931	72.0244	0.00020815
c__unclassified_p__Candidatus_Glassiibacteriota	12.3098	0.00011877	318.179	0.00091954
c__unclassified_p__Candidatus_Ratteibacteria	12.0736	0.00011649	81.7446	0.00023624
c__unclassified_p__Candidatus_Microgenomates	11.881	0.00011463	70.0717	0.00020251
c__unclassified_p__Armatimonadota	11.829	0.00011413	43.2248	0.00012492
c__unclassified_p__Candidatus_Anderseniibacteriota	11.7786	0.00011364	0	0
c__Monoblepharidomycetes	11.2459	0.0001085	717.523	0.00207366
c__unclassified_p__Candidatus_Zambryskiibacteriota	10.9055	0.00010522	198.02	0.00057228
c__unclassified_p__candidate_division_KD3-62	10.6052	0.00010232	112.134	0.00032407
c__unclassified_p__Candidatus_Liptoniibacteriota	10.5911	0.00010219	77.1552	0.00022298
c__Candidatus_Dormibacteria	10.359	9.995e-05	357.586	0.00103343
c__Bivalvia	9.8031	9.458e-05	9.937	2.872e-05
c__Stylonematophyceae	9.5914	9.254e-05	78.391	0.00022655
c__Candidatus_Electryoneia	9.155	8.833e-05	112.365	0.00032474
c__Dipodascomycetes	9.116	8.795e-05	907.065	0.00262144
c__Glaucocystophyceae	8.7494	8.442e-05	206.511	0.00059682
c__Thermodesulfobiia	8.6067	8.304e-05	6.2937	1.819e-05
c__unclassified_p__Candidatus_Amesbacteria	8.5802	8.278e-05	37.333	0.00010789
c__Thermoanaerobaculia	8.5141	8.215e-05	727.7	0.00210307
c__Candidatus_Nanoperiomorbia	8.4864	8.188e-05	5.4762	1.583e-05
c__unclassified_p__Candidatus_Wildermuthiibacteriota	8.3653	8.071e-05	39.0219	0.00011277
c__unclassified_p__Candidatus_Kryptoniota	8.3244	8.032e-05	219.437	0.00063418
c__Synurophyceae	8.1783	7.891e-05	394.302	0.00113954
c__Picomonadea	8.0081	7.727e-05	26.6808	7.711e-05
c__Candidatus_Desulfofervidia	7.9278	7.649e-05	116.578	0.00033691
c__unclassified_p__Candidatus_Raymondiibacteriota	7.5034	7.24e-05	429.44	0.00124109
c__unclassified_p__Candidatus_Buchananiibacteriota	7.4782	7.215e-05	48.4522	0.00014003
c__unclassified_p__Candidatus_Hermodarchaeota	7.2456	6.991e-05	1.0919	3.16e-06
c__Rhabditophora	7.2171	6.963e-05	86.477	0.00024992
c__unclassified_p__Candidatus_Effluviviacota	7.2125	6.959e-05	46.8548	0.00013541
c__unclassified_p__Candidatus_Hydrothermarchaeota	7.1937	6.941e-05	0	0
c__Chitinivibrionia	7.0286	6.781e-05	39.1981	0.00011328
c__unclassified_p__Candidatus_Lindowiibacteriota	6.9281	6.684e-05	225.477	0.00065163
c__Theionarchaea	6.4277	6.202e-05	193.422	0.00055899
c__Gastropoda	6.3983	6.173e-05	26.8943	7.773e-05
c__unclassified_p__Candidatus_Yonathiibacteriota	6.3439	6.121e-05	3.3582	9.71e-06
c__unclassified_p__Candidatus_Brockarchaeota	6.312	6.09e-05	12.3772	3.577e-05
c__unclassified_p__Candidatus_Vogeliibacteriota	6.2474	6.028e-05	37.6394	0.00010878
c__Pneumocystomycetes	6.2433	6.024e-05	539.937	0.00156043
c__Lipomycetes	6.1477	5.932e-05	155.69	0.00044995
c__unclassified_p__Candidatus_Abawacaibacteriota	5.9791	5.769e-05	25.2605	7.3e-05
c__Conexivisphaeria	5.8182	5.614e-05	137.293	0.00039678
c__unclassified_p__candidate_division_CPR2	5.7257	5.524e-05	9.0542	2.617e-05
c__Candidatus_Nanosyncoccalia	5.7142	5.513e-05	255.727	0.00073906
c__Trigonopsidomycetes	5.5745	5.378e-05	29.3271	8.476e-05
c__Candidatus_Jordarchaeia	5.5595	5.364e-05	676.562	0.00195528
c__unclassified_p__Candidatus_Harrisoniibacteriota	5.4106	5.22e-05	45.92	0.00013271
c__Geoglossomycetes	5.3822	5.193e-05	55.3573	0.00015998
c__Xylonomycetes	5.316	5.129e-05	8.0738	2.333e-05
c__unclassified_p__Candidatus_Pyropristinus	5.3122	5.125e-05	0	0
c__Candidatus_Micrarchaeia	5.0991	4.92e-05	284.085	0.00082101
c__Nebulidea	4.9747	4.8e-05	17.9457	5.186e-05
c__Pokkesviricetes	4.948	4.774e-05	124.239	0.00035905
c__Wallemiomycetes	4.8498	4.679e-05	27.279	7.884e-05
c__Candidatus_Lokiarchaeia	4.7709	4.603e-05	547.191	0.00158139
c__Fragilariophyceae	4.7083	4.543e-05	199.267	0.00057588
c__unclassified_p__Candidatus_Helarchaeota	4.7079	4.542e-05	118.569	0.00034267
c__unclassified_p__Candidatus_Kerfeldiibacteriota	4.5784	4.417e-05	106.18	0.00030686
c__unclassified_p__Candidatus_Jacksoniibacteriota	4.4498	4.293e-05	0	0
c__Monjiviricetes	4.4301	4.274e-05	425.149	0.00122869
c__Aves	4.4061	4.251e-05	0	0
c__Dacrymycetes	4.3425	4.19e-05	40.6543	0.00011749
c__unclassified_p__Candidatus_Parvarchaeota	4.2972	4.146e-05	50.6435	0.00014636
c__unclassified_p__Candidatus_Komeiliibacteriota	4.2931	4.142e-05	86.7829	0.0002508
c__unclassified_p__Candidatus_Jorgensenbacteria	4.2885	4.138e-05	77.4412	0.00022381
c__Candidatus_Tharpellia	4.2269	4.078e-05	97.7989	0.00028264
c__unclassified_p__Candidatus_Blackburniibacteriota	4.176	4.029e-05	22.7908	6.587e-05
c__Candidatus_Bipolaricaulia	4.0832	3.94e-05	245.777	0.0007103
c__Malacostraca	3.721	3.59e-05	506.996	0.00146523
c__unclassified_p__Atribacterota	3.2281	3.115e-05	9.8584	2.849e-05
c__Candidatus_Paceibacteria	3.1492	3.038e-05	9.6558	2.791e-05
c__unclassified_p__Ciliophora	3.1407	3.03e-05	0	0
c__unclassified_p__Candidatus_Woykeibacteriota	3.0059	2.9e-05	0	0
c__Abditibacteriia	2.95	2.846e-05	25.2146	7.287e-05
c__Bartheletiomycetes	2.6821	2.588e-05	0	0
c__unclassified_p__Candidatus_Collierbacteria	2.6047	2.513e-05	121.86	0.00035218
c__Pinopsida	2.5104	2.422e-05	11.6484	3.366e-05
c__Candidatus_Hodarchaeia	2.4779	2.391e-05	152.171	0.00043978
c__Branchiopoda	2.4427	2.357e-05	63.29	0.00018291
c__Candidatus_Methanoliparia	2.389	2.305e-05	36.28	0.00010485
c__unclassified_p__Candidatus_Campbellbacteria	2.3681	2.285e-05	25.4488	7.355e-05
c__Methanonatronarchaeia	2.3647	2.282e-05	2.4127	6.97e-06
c__Mammalia	2.2652	2.186e-05	42.5538	0.00012298
c__unclassified_p__Candidatus_Terryibacteriota	2.2439	2.165e-05	3.7541	1.085e-05
c__Candidatus_Elulimicrobia	1.9775	1.908e-05	37.3478	0.00010794
c__Candidatus_Culexarchaeia	1.9646	1.895e-05	6.0909	1.76e-05
c__Candidatus_Asgardarchaeia_(ex_Tamarit_et_al._2024)	1.8335	1.769e-05	1088.33	0.0031453
c__unclassified_p__Candidatus_Beckwithbacteria	1.8014	1.738e-05	86.0207	0.0002486
c__Malasseziomycetes	1.7206	1.66e-05	151.127	0.00043676
c__Candidatus_Nanohaloarchaea	1.6923	1.633e-05	15.4057	4.452e-05
c__Echinamoebida	1.6427	1.585e-05	0	0
c__Bryopsida	1.5999	1.544e-05	0	0
c__unclassified_p__Halobacteriota	1.4026	1.353e-05	726.71	0.00210021
c__Neolectomycetes	1.2195	1.177e-05	53.2125	0.00015379
c__unclassified_k__Heunggongvirae	0.9924	9.57e-06	169.017	0.00048846
c__unclassified_p__Candidatus_Ryaniibacteriota	0.9086	8.77e-06	351.166	0.00101488
c__Candidatus_Aminicenantia	0.8444	8.15e-06	36.2572	0.00010478
c__Taphrinomycetes	0.7576	7.31e-06	47.3038	0.00013671
c__unclassified_p__Chordata	0.6514	6.28e-06	0	0
c__Arthoniomycetes	0.5782	5.58e-06	19.0022	5.492e-05
c__Sareomycetes	0	0	8.1224	2.347e-05
c__unclassified_p__Cercozoa	0	0	12.6508	3.656e-05
c__Ascidiacea	0	0	35.9793	0.00010398
c__Atractiellomycetes	0	0	47.3939	0.00013697
c__unclassified_p__Nucleocytoviricota	0	0	34.6804	0.00010023
c__unclassified_p__Verrucomicrobiota	0	0	225.975	0.00065307
c__Tichowtungiia	0	0	131.742	0.00038074
c__unclassified_p__Zoopagomycota	0	0	97.7708	0.00028256
c__Xylobotryomycetes	0	0	3.4632	1.001e-05
c__unclassified_k__Fungi	0	0	22.8266	6.597e-05
c__Cystobasidiomycetes	0	0	33.7148	9.744e-05
c__Cycadopsida	0	0	95.6562	0.00027645
c__Coniocybomycetes	0	0	65.8369	0.00019027
c__Compsopogonophyceae	0	0	12.3722	3.576e-05
c__Chitinispirillia	0	0	37.9004	0.00010953
c__unclassified_p__Candidatus_Fraseribacteriota	0	0	8.0272	2.32e-05
c__unclassified_p__Candidatus_Geothermarchaeota	0	0	7.855	2.27e-05
c__unclassified_p__Candidatus_Gerdarchaeota	0	0	17.381	5.023e-05
c__Eurotatoria	0	0	5.1348	1.484e-05
c__unclassified_p__Candidatus_Blackallbacteria	0	0	48.6167	0.0001405
c__unclassified_p__Candidatus_Chisholmiibacteriota	0	0	22.5637	6.521e-05
c__Lichinomycetes	0	0	10.3092	2.979e-05
c__Maveriviricetes	0	0	36.6108	0.00010581
c__Mediophyceae	0	0	118.203	0.00034161
c__Mixiomycetes	0	0	25.0996	7.254e-05
c__Flasuviricetes	0	0	23.0392	6.658e-05
c__Candidatus_Tritonobacteria	0	0	19.3471	5.591e-05
c__Candidatus_Tariuqbacteria	0	0	10.0992	2.919e-05
c__Candidatus_Odinarchaeia	0	0	2.4468	7.07e-06
c__Candidatus_Polarisedimenticolia	0	0	42.8205	0.00012375
c__Candidatus_Methanomethylicia	0	0	119.993	0.00034678
c__unclassified_p__Candidatus_Methanomethylicota	0	0	16.5191	4.774e-05
c__unclassified_p__Candidatus_Mcinerneyibacteriota	0	0	1.3182	3.81e-06
c__unclassified_p__Candidatus_Niyogiibacteriota	0	0	15.5385	4.491e-05
c__unclassified_p__Candidatus_Nezhaarchaeota	0	0	13.2446	3.828e-05
c__unclassified_p__Candidatus_Kuenenbacteria	0	0	34.8614	0.00010075
c__Candidatus_Borrarchaeia	0	0	15.0283	4.343e-05
c__Candidatus_Dadabacteria	0	0	43.0657	0.00012446
c__unclassified_p__Candidatus_Wirthbacteria	0	0	45.869	0.00013256
c__unclassified_p__Candidatus_Spechtiibacteriota	0	0	7.298	2.109e-05
c__Anthozoa	0	0	83.0084	0.0002399
c__unclassified_p__candidate_division_LCP-89	0	0	139.879	0.00040425
Total Classified (Sum)	1.03645e+07	100	3.46018e+07	100

## Sheet: Order
Order	FM_RPKM_Value	FM_Ratio (%)	FC_RPKM_Value	FC_Ratio (%)
o__Eubacteriales	2.57585e+06	24.8527	7.02799e+06	20.311
o__Lachnospirales	2.20074e+06	21.2335	2.06653e+06	5.97232
o__Erysipelotrichales	1.48468e+06	14.3247	5.53587e+06	15.9988
o__Desulfovibrionales	686917	6.62762	2.553e+06	7.37823
o__Methanobacteriales	677345	6.53527	239913	0.693355
o__unclassified_p__Bacillota	370840	3.578	138159	0.399283
o__Bacteroidales	305137	2.94407	2.50591e+06	7.24212
o__Enterobacterales	238854	2.30455	328249	0.948648
o__Peptostreptococcales	159402	1.53797	1.14899e+06	3.32061
o__Bacillales	137707	1.32865	429475	1.24119
o__unclassified_c__Caudoviricetes	135611	1.30842	1.17077e+06	3.38355
o__Deferribacterales	87590.5	0.845105	66728.1	0.192846
o__Verrucomicrobiales	85348.6	0.823474	86839.3	0.250967
o__Propionibacteriales	82987.3	0.800692	152446	0.440573
o__Lactobacillales	68976	0.665505	168655	0.487416
o__Nitrososphaerales	61828.1	0.59654	396743	1.14659
o__Christensenellales	61037.8	0.588915	487422	1.40866
o__Spirochaetales	56563.8	0.545748	150020	0.433561
o__Eggerthellales	49937.3	0.481814	123521	0.356978
o__Micrococcales	45762.5	0.441533	123896	0.358063
o__unclassified_c__Clostridia	43614.8	0.420811	60088.8	0.173658
o__Hyphomicrobiales	35335.8	0.340933	1.91897e+06	5.54587
o__Tissierellales	31570.4	0.304602	141156	0.407945
o__unclassified_c__Tissierellia	26028.8	0.251135	73723.7	0.213063
o__Micromonosporales	25254.7	0.243667	49343.8	0.142605
o__Selenomonadales	25195	0.243091	77084.5	0.222776
o__Synergistales	22554.8	0.217617	143326	0.414215
o__Nostocales	21018.9	0.202798	8134.89	0.02351
o__Fusobacteriales	18402.4	0.177553	313057	0.904741
o__unclassified_c__Bacilli	18032.5	0.173984	236313	0.682951
o__Burkholderiales	18001.9	0.173689	84778.9	0.245013
o__Acidaminococcales	16048	0.154837	21933	0.0633867
o__Sphingomonadales	15954.6	0.153935	71648	0.207064
o__Brevinematales	14884.3	0.143609	57971.5	0.167539
o__unclassified_d__Viruses	13212.2	0.127476	91551	0.264584
o__Pseudonocardiales	11428.3	0.110264	143201	0.413855
o__Solirubrobacterales	11378.9	0.109788	150169	0.433992
o__Thermoanaerobacterales	10707.2	0.103306	22765	0.0657914
o__Flavobacteriales	10215	0.0985577	113978	0.329399
o__unclassified_d__Archaea	9883.83	0.0953628	9508.27	0.0274791
o__Chroococcidiopsidales	9336.84	0.0900853	2520.42	0.00728406
o__Mycobacteriales	9087.85	0.0876829	714369	2.06454
o__Rhodospirillales	8655.38	0.0835103	154230	0.445728
o__Rhodobacterales	8509.72	0.0821049	359167	1.038
o__Mycoplasmatales	8079.3	0.077952	86075	0.248758
o__Neisseriales	7966.2	0.0768608	11279.8	0.032599
o__unclassified_p__Euryarchaeota	7714.7	0.0744342	2114.21	0.00611011
o__unclassified_p__Mycoplasmatota	7080.86	0.0683187	307594	0.888954
o__Campylobacterales	6622.19	0.0638933	24596.7	0.0710849
o__Veillonellales	6601.14	0.0636902	41899	0.121089
o__Desulfobacterales	6490.83	0.0626259	29590	0.0855157
o__Pleosporales	6323.57	0.061012	597.091	0.00172561
o__Kitasatosporales	6061.57	0.0584842	47252.1	0.13656
o__Moorellales	5684.57	0.0548468	16901.9	0.0488467
o__Brachyspirales	5425.15	0.0523439	72051.3	0.20823
o__Pseudomonadales	5404.04	0.0521401	292986	0.846736
o__Mycoplasmoidales	5220.4	0.0503683	120069	0.347002
o__Basidiobolales	5210.04	0.0502683	762.594	0.00220391
o__Desulfobulbales	5107.39	0.049278	24893.6	0.071943
o__Acidimicrobiales	5087.5	0.049086	78308.1	0.226312
o__Nitrosopumilales	4803.86	0.0463494	8949.85	0.0258652
o__unclassified_p__Candidatus_Saccharibacteria	4293.12	0.0414215	17539.1	0.0506883
o__Vibrionales	4208.14	0.0406017	858479	2.48102
o__Holosporales	4056.73	0.0391408	65909.5	0.19048
o__Coriobacteriales	4008.12	0.0386718	14632.8	0.0422892
o__Cytophagales	3943.84	0.0380516	31237.6	0.0902774
o__Methanosarcinales	3764.04	0.0363168	15380.5	0.0444499
o__Rhodocyclales	3745.68	0.0361396	14125	0.0408215
o__Lysobacterales	3707.99	0.035776	15318.7	0.0442714
o__Gaiellales	3644.65	0.035165	50356.5	0.145531
o__Entrophosporales	3475.52	0.0335331	7957.96	0.0229987
o__Lutisporales	3408.22	0.0328837	12338	0.0356572
o__Mucorales	3362.04	0.0324382	21194.4	0.0612522
o__unclassified_p__Candidatus_Omnitrophota	3348.95	0.0323119	12838.9	0.0371048
o__Anaerolineales	3300.41	0.0318436	11691.6	0.033789
o__Moraxellales	3160.08	0.0304896	24214.7	0.069981
o__Peronosporales	3143.31	0.0303278	2205.51	0.00637396
o__Rubrobacterales	3051.96	0.0294464	12391.1	0.0358104
o__Candidatus_Gastranaerophilales	3015.24	0.0290922	12299.9	0.0355469
o__Candidatus_Adiutricales	2911.97	0.0280957	10013	0.0289378
o__Agaricales	2881.7	0.0278036	10749.9	0.0310675
o__Chromatiales	2804.57	0.0270595	27553.8	0.079631
o__Acholeplasmatales	2780.51	0.0268273	84069.6	0.242963
o__Sphingobacteriales	2715.93	0.0262043	18853.7	0.0544877
o__Bifidobacteriales	2705.23	0.0261011	7387.11	0.0213489
o__Thermosediminibacterales	2695.53	0.0260074	8694.99	0.0251287
o__Nitrosomonadales	2689.28	0.0259471	20780.8	0.0600569
o__Methanomassiliicoccales	2668.02	0.0257421	3896.9	0.0112621
o__Strigeidida	2562.49	0.0247239	341.436	0.00098676
o__Chitinophagales	2453.01	0.0236675	36638.5	0.105886
o__Methanomicrobiales	2431.05	0.0234557	8547.24	0.0247017
o__Oceanospirillales	2376.84	0.0229326	20788.5	0.0600791
o__Streptosporangiales	2352.58	0.0226985	17918.5	0.0517849
o__Aeromonadales	2303.16	0.0222217	104185	0.301097
o__Alteromonadales	2264.98	0.0218533	49680.3	0.143577
o__unclassified_p__Candidatus_Aminicenantota	2087.16	0.0201376	11499.8	0.0332348
o__Saprolegniales	2084.58	0.0201128	4350.31	0.0125725
o__Monoglobales	2068.16	0.0199543	8688.99	0.0251114
o__unclassified_c__Candidatus_Hydrothermia	2007.46	0.0193687	14.3829	4.157e-05
o__Candidatus_Acidiferrales	1952.28	0.0188363	22102.5	0.0638766
o__Geobacterales	1944.14	0.0187578	7711.69	0.0222869
o__unclassified_c__Betaproteobacteria	1907.41	0.0184034	8558.69	0.0247348
o__unclassified_p__Candidatus_Paceibacterota	1872.97	0.0180711	6406.99	0.0185163
o__Glomerales	1856.96	0.0179167	9125.05	0.0263716
o__Petrotogales	1814.71	0.0175089	2910.69	0.00841196
o__Desulfuromonadales	1779.22	0.0171665	5787.75	0.0167267
o__Halanaerobiales	1713.45	0.016532	9383.36	0.0271181
o__Culicoidibacterales	1707.44	0.016474	1885.71	0.00544975
o__Endomicrobiales	1656.68	0.0159843	15716.9	0.0454222
o__unclassified_c__Gammaproteobacteria	1654.98	0.0159678	8127.94	0.0234899
o__Crassvirales	1594.21	0.0153815	72141.3	0.20849
o__Methylococcales	1593.4	0.0153737	7936.48	0.0229366
o__unclassified_p__Candidatus_Hydrogenedentota	1564.33	0.0150933	9523.24	0.0275224
o__unclassified_p__Candidatus_Neomarinimicrobiota	1560.38	0.0150551	7969.48	0.023032
o__Candidatus_Saccharimonadales	1547.15	0.0149275	10114.2	0.0292302
o__unclassified_d__Bacteria	1521.94	0.0146842	7818.61	0.022596
o__Marinilabiliales	1518.85	0.0146545	31256	0.0903305
o__unclassified_p__Microsporidia	1518.83	0.0146542	445523	1.28757
o__Pasteurellales	1493.15	0.0144064	7796.99	0.0225335
o__Rickettsiales	1449.85	0.0139887	48055.1	0.13888
o__Terrimicrobiales	1439.22	0.0138861	4732.48	0.013677
o__Thiotrichales	1438.94	0.0138835	22701.9	0.0656089
o__Eustigmatales	1383.63	0.0133498	815.338	0.00235634
o__unclassified_p__Candidatus_Cloacimonadota	1366.79	0.0131872	7319.96	0.0211548
o__Methanococcales	1354.7	0.0130706	553.028	0.00159826
o__Candidatus_Bathyarchaeales	1312.99	0.0126682	1047.1	0.00302614
o__Candidatus_Pelagibacterales	1265.94	0.0122143	6811.08	0.0196842
o__Myxococcales	1221.67	0.0117871	7851.27	0.0226903
o__unclassified_p__Nitrososphaerota	1135.29	0.0109537	13582.8	0.0392546
o__Oscillatoriales	1127.15	0.0108752	4981.94	0.0143979
o__Victivallales	1109.83	0.0107081	5127.75	0.0148193
o__Geodermatophilales	1102.75	0.0106397	5403.86	0.0156173
o__unclassified_p__Candidatus_Poribacteria	1088.01	0.0104975	5227.74	0.0151083
o__unclassified_p__Candidatus_Rokuibacteriota	1087.05	0.0104883	8134.98	0.0235103
o__Umbelopsidales	1079.96	0.0104199	601.154	0.00173735
o__Chthoniobacterales	1039.18	0.0100264	4872.84	0.0140826
o__Syntrophales	1006.88	0.00971479	4248.16	0.0122773
o__Thermodesulfobacteriales	992.241	0.0095735	1064.79	0.00307727
o__Legionellales	943.346	0.00910174	18371.4	0.0530936
o__unclassified_p__Candidatus_Methylomirabilota	938.334	0.00905339	15058.2	0.0435185
o__Charales	925.504	0.0089296	940.025	0.00271669
o__Desulfarculales	916.327	0.00884105	2769.45	0.00800378
o__unclassified_p__Candidatus_Dormiibacterota	910.938	0.00878906	15583.3	0.0450362
o__Thermotogales	908.885	0.00876925	5932.39	0.0171447
o__Actinomycetales	886.87	0.00855684	4624.95	0.0133662
o__Chytridiales	870.313	0.00839709	2571.08	0.00743048
o__Saprospirales	861.872	0.00831565	3871.21	0.0111879
o__Terriglobales	859.933	0.00829695	8133.57	0.0235062
o__unclassified_p__Candidatus_Rifleibacteriota	857.367	0.00827219	3499.06	0.0101124
o__Gracilariales	843.135	0.00813487	73.2108	0.00021158
o__Nitrospirales	835.159	0.00805791	12384.6	0.0357918
o__unclassified_p__Nanoarchaeota	819.185	0.00790379	1862.95	0.00538397
o__Polyporales	811.643	0.00783103	620.931	0.0017945
o__Fibrobacterales	785.542	0.00757919	4360.12	0.0126008
o__Acidithiobacillales	763.772	0.00736915	2259.45	0.00652985
o__Orbales	754.327	0.00727802	2433.03	0.0070315
o__unclassified_c__Candidatus_Peribacteria	753.67	0.00727168	2273.51	0.0065705
o__unclassified_p__Candidatus_Latescibacterota	752.844	0.00726371	4497.18	0.0129969
o__unclassified_c__Candidatus_Binatia	751.229	0.00724813	11714.6	0.0338555
o__Dethiobacterales	703.576	0.00678835	2655.12	0.00767335
o__unclassified_p__Thermoproteota	680.522	0.00656592	12400.4	0.0358373
o__Candidatus_Vecturitrichales	680.413	0.00656487	2617.15	0.00756361
o__Pirellulales	670.827	0.00647238	100051	0.289151
o__Entomoplasmatales	669.265	0.00645731	8798.17	0.0254269
o__unclassified_p__Candidatus_Nomurabacteria	646.171	0.00623449	3821.75	0.0110449
o__Caulobacterales	635.765	0.0061341	7947.58	0.0229687
o__Syntrophobacterales	634.942	0.00612615	2085.96	0.00602846
o__Aquificales	623.174	0.00601261	2705.39	0.00781863
o__Thermoleophilales	621.949	0.00600079	13618.2	0.039357
o__unclassified_p__Candidatus_Woesearchaeota	614.718	0.00593102	4579.87	0.0132359
o__Caldicellulosiruptorales	601.737	0.00580578	2410.63	0.00696678
o__Candidatus_Brocadiales	582.44	0.00561959	3671.47	0.0106106
o__Leptolyngbyales	577.9	0.00557579	2255.15	0.00651744
o__Caldisericales	555.46	0.00535927	85.9892	0.00024851
o__unclassified_p__Cyanobacteriota	536.109	0.00517257	2702.47	0.00781018
o__unclassified_p__Candidatus_Eiseniibacteriota	522.991	0.00504601	5286.83	0.015279
o__Kosmotogales	502.808	0.00485128	1365.72	0.00394695
o__Tubulavirales	499.823	0.00482248	1166.37	0.00337083
o__Cellvibrionales	497.63	0.00480131	49029.2	0.141695
o__Sporadotrichida	494.618	0.00477225	456.842	0.00132028
o__Synechococcales	486.555	0.00469446	3209.3	0.00927496
o__unclassified_p__Candidatus_Zixiibacteriota	482.465	0.00465499	6199.26	0.017916
o__Parachlamydiales	478.632	0.00461802	12764.8	0.0368906
o__unclassified_c__Deltaproteobacteria	476.009	0.0045927	5145.46	0.0148705
o__unclassified_c__Candidatus_Bathyarchaeia	474.781	0.00458086	2323.98	0.00671635
o__unclassified_p__Candidatus_Kapaibacteriota	468.969	0.00452479	1325.21	0.00382988
o__unclassified_p__Candidatus_Aenigmatarchaeota	468.76	0.00452277	3508.24	0.0101389
o__Chloroflexales	465.05	0.00448697	1822.76	0.00526782
o__Diversisporales	455.792	0.00439764	12671.9	0.0366221
o__unclassified_p__Candidatus_Melainabacteria	452.739	0.00436819	4216.71	0.0121864
o__unclassified_p__Candidatus_Gottesmanbacteria	447.404	0.00431671	131.858	0.00038107
o__Cardiobacteriales	444.218	0.00428597	119.276	0.00034471
o__unclassified_c__Terriglobia	443.351	0.00427761	5774.69	0.016689
o__unclassified_p__Candidatus_Nealsoniibacteriota	443.289	0.00427701	3846.18	0.0111156
o__Methanophagales	436.957	0.00421592	495.382	0.00143166
o__Candidatus_Cryosericales	428.31	0.00413249	1080.91	0.00312385
o__Chlorobiales	425.258	0.00410304	1982.6	0.00572976
o__Harpellales	421.362	0.00406545	3627.78	0.0104843
o__Holophagales	419.412	0.00404664	1241.13	0.0035869
o__unclassified_p__Candidatus_Sumerlaeota	410.497	0.00396063	2521.11	0.00728607
o__Opitutales	402.495	0.00388342	1625.12	0.00469663
o__Chroococcales	398.413	0.00384403	1990.05	0.00575128
o__Candidatus_Deferrimicrobiales	384.687	0.0037116	23744.5	0.068622
o__Planctomycetales	383.732	0.00370238	20445.8	0.0590888
o__Nakamurellales	381.167	0.00367764	5623.93	0.0162533
o__Longimicrobiales	374.939	0.00361755	2059.31	0.00595146
o__Dehalococcoidales	368.499	0.00355541	1087.44	0.00314271
o__Kineosporiales	359.486	0.00346845	2184.49	0.00631322
o__unclassified_p__Candidatus_Kaiserbacteria	352.067	0.00339687	1404.51	0.00405907
o__Caldilineales	347.955	0.0033572	7189.93	0.020779
o__Hypocreales	345.745	0.00333588	927.417	0.00268026
o__unclassified_p__Candidatus_Parcubacteria	343.029	0.00330967	2617.01	0.00756322
o__Candidatus_Izemoplasmatales	343.015	0.00330954	2327.33	0.00672602
o__Bdellovibrionales	342.494	0.0033045	8956.01	0.0258831
o__Bacteriovoracales	337.638	0.00325765	1518.34	0.00438803
o__Jiangellales	333.581	0.00321851	1666.72	0.00481686
o__Mortierellales	333.186	0.0032147	3298.37	0.00953235
o__Chlorokybales	326.44	0.00314961	172.473	0.00049845
o__unclassified_p__Candidatus_Bathyarchaeota	314.826	0.00303755	7130.23	0.0206065
o__Polyangiales	313.982	0.00302941	5203.98	0.0150396
o__Puniceicoccales	313.566	0.0030254	1145.51	0.00331054
o__unclassified_p__Candidatus_Moraniibacteriota	311.685	0.00300725	3011.38	0.00870294
o__Candidatus_Fibrimonadales	302.333	0.00291702	441.524	0.00127601
o__unclassified_p__Candidatus_Delongiibacteriota	291.222	0.00280981	1522.89	0.00440119
o__unclassified_p__Candidatus_Bipolaricaulota	289.44	0.00279262	1595.53	0.00461113
o__Clevelandellida	288.329	0.00278191	0	0
o__unclassified_c__Thermoplasmata	286.69	0.00276609	4606.46	0.0133128
o__unclassified_p__Candidatus_Micrarchaeota	286.237	0.00276172	970.906	0.00280594
o__Gemmatales	283.191	0.00273233	5568.52	0.0160931
o__Rhabditida	280.887	0.0027101	3.9575	1.144e-05
o__Neocallimastigales	272.411	0.00262832	4310.95	0.0124587
o__Frankiales	269.194	0.00259728	6351.61	0.0183563
o__unclassified_c__Filasterea	269.147	0.00259682	6830.63	0.0197407
o__Leptospirales	266.077	0.00256721	1996.86	0.00577097
o__unclassified_p__Candidatus_Margulisiibacteriota	253.061	0.00244163	1958.48	0.00566006
o__Micropepsales	252.697	0.00243811	5480.5	0.0158388
o__Deinococcales	252.232	0.00243363	1011.04	0.00292194
o__Eucoccidiorida	245.385	0.00236757	1841.98	0.00532336
o__unclassified_c__Alphaproteobacteria	245.187	0.00236566	14007.9	0.0404832
o__unclassified_p__Candidatus_Walliibacteriota	242.876	0.00234336	488.888	0.0014129
o__Isosphaerales	240.709	0.00232245	4383.08	0.0126672
o__Chlamydiales	238.772	0.00230375	37788.4	0.109209
o__Ktedonobacterales	238.152	0.00229777	1106.25	0.00319708
o__Hyphomonadales	235.59	0.00227306	5428.15	0.0156875
o__Bunyavirales	235.372	0.00227095	61.2098	0.0001769
o__unclassified_p__candidate_division_WOR-3	230.345	0.00222245	2390.27	0.00690794
o__Sedimentisphaerales	228.916	0.00220866	523.623	0.00151328
o__Rhizophydiales	226.528	0.00218563	1660.33	0.00479839
o__Candidatus_Cloacimonadales	225.815	0.00217874	2147.66	0.0062068
o__Heterotrichida	222.29	0.00214473	593.099	0.00171407
o__Entomophthorales	221.089	0.00213314	898.263	0.002596
o__Candidatus_Babeliales	219.263	0.00211553	23.7454	6.862e-05
o__unclassified_c__Coriobacteriia	218.988	0.00211288	811.956	0.00234657
o__Elusimicrobiales	218.784	0.0021109	1503.26	0.00434444
o__unclassified_p__Candidatus_Auribacterota	218.306	0.0021063	906.11	0.00261868
o__unclassified_p__Candidatus_Falkowbacteria	218.268	0.00210593	1279.58	0.003698
o__Tremellales	216.283	0.00208677	187.773	0.00054267
o__Jatrophihabitantales	212.663	0.00205185	1247.23	0.00360453
o__Natranaerobiales	212.455	0.00204984	646.556	0.00186856
o__Craspedida	212.027	0.00204572	8489.59	0.0245351
o__Lefavirales	207.815	0.00200508	506.329	0.0014633
o__Actinopolysporales	201.897	0.00194797	277.387	0.00080166
o__Haloplasmatales	200.363	0.00193317	1248.63	0.00360857
o__Syntrophorhabdales	198.037	0.00191073	2868.26	0.00828934
o__Thermodesulfovibrionales	197.033	0.00190105	2199.54	0.00635672
o__Desulfuribacillales	196.637	0.00189723	1425.65	0.00412017
o__unclassified_p__Candidatus_Tectimicrobiota	195.235	0.0018837	2520.36	0.0072839
o__Glycomycetales	191.013	0.00184296	825.775	0.00238651
o__unclassified_c__Blastocatellia	189.599	0.00182932	376.286	0.00108747
o__Hymenochaetales	188.876	0.00182234	140.474	0.00040597
o__Ignavibacteriales	188.024	0.00181412	855.383	0.00247207
o__Candidatus_Binatales	185.293	0.00178777	4197.37	0.0121305
o__Anaeroplasmatales	183.004	0.00176568	2696.27	0.00779229
o__unclassified_c__Candidatus_Krumholzibacteriia	181.692	0.00175303	1520.2	0.00439342
o__Archaeosporales	181.69	0.00175301	3279.8	0.00947869
o__unclassified_d__Eukaryota	180.451	0.00174106	1051.61	0.00303917
o__Saccharofermentanales	179.45	0.0017314	164.373	0.00047504
o__unclassified_p__Candidatus_Fermentibacteria	178.14	0.00171876	365.435	0.00105612
o__Geminicoccales	175.445	0.00169275	3116.16	0.00900576
o__Oxymonadida	175.427	0.00169258	1231.19	0.00355818
o__Coprothermobacterales	173.619	0.00167514	718.259	0.00207578
o__Emcibacterales	172.239	0.00166183	3576.15	0.0103352
o__Methanotrichales	170.717	0.00164714	1001.63	0.00289472
o__unclassified_p__Candidatus_Peregrinibacteria	170.244	0.00164258	1676.46	0.004845
o__Candidatus_Methylomirabilales	169.656	0.0016369	3010.48	0.00870035
o__Candidatus_Moduliflexales	168.956	0.00163015	602.255	0.00174053
o__Sphaerobacterales	168.824	0.00162887	1307.4	0.00377841
o__Orthopolintovirales	165.594	0.00159771	3490.63	0.010088
o__Limisphaerales	160.776	0.00155123	1351.79	0.00390671
o__Kickxellales	160.578	0.00154932	2869.83	0.00829387
o__Pseudanabaenales	160.195	0.00154562	908.462	0.00262547
o__Vulcanimicrobiales	158.954	0.00153364	1659.7	0.00479658
o__Halobacteriales	157.013	0.00151492	962.56	0.00278182
o__Rhodothermales	156.454	0.00150953	4394.44	0.0127
o__Suessiales	155.796	0.00150318	1701.43	0.00491716
o__Chaetothyriales	154.755	0.00149314	372.676	0.00107704
o__unclassified_p__Candidatus_Aerophobetes	153.541	0.00148142	3341.74	0.0096577
o__Aggregatilineales	152.878	0.00147502	1058.29	0.00305848
o__Euplotida	149.95	0.00144678	591.644	0.00170986
o__Dictyoglomales	148.495	0.00143273	353.198	0.00102075
o__Candidatus_Methanofastidiosales	147.889	0.00142689	520.815	0.00150517
o__Kordiimonadales	147.859	0.0014266	2086.52	0.00603008
o__unclassified_c__Candidatus_Saccharimonadia	143.662	0.0013861	2827.79	0.00817237
o__Desulfomonilales	140.376	0.0013544	976.543	0.00282223
o__Miltoncostaeales	140.019	0.00135095	2750.63	0.00794937
o__unclassified_p__Candidatus_Woesebacteria	139.81	0.00134893	587.994	0.00169932
o__Desulfatiglandales	139.321	0.00134422	933.308	0.00269728
o__Pleurocapsales	139.085	0.00134194	2274.21	0.00657251
o__Candidatus_Subteraquimicrobiales	138.637	0.00133762	291.495	0.00084243
o__Pythiales	137.208	0.00132384	1326.92	0.00383484
o__Poales	135.962	0.00131181	34.4883	9.967e-05
o__Thermales	134.247	0.00129526	975.669	0.0028197
o__Candidatus_Entotheonellales	128.989	0.00124453	3495.94	0.0101033
o__unclassified_p__Candidatus_Diapherotrites	128.33	0.00123817	1374.34	0.00397186
o__Zoopagales	127.504	0.00123021	1605.53	0.00464003
o__Glomerellales	126.859	0.00122398	812.8	0.00234901
o__Catenulisporales	125.529	0.00121115	891.111	0.00257533
o__Koleobacterales	124.729	0.00120343	649.053	0.00187578
o__unclassified_p__Synergistota	123.001	0.00118676	618.722	0.00178812
o__Desulfurellales	119.643	0.00115436	206.615	0.00059712
o__Acidiferrobacterales	119.495	0.00115293	972.644	0.00281096
o__Balneolales	118.957	0.00114774	1367.4	0.00395181
o__Dimargaritales	117.029	0.00112914	579.358	0.00167436
o__Sneathiellales	115.412	0.00111353	4842.66	0.0139954
o__unclassified_c__Thermoprotei	114.276	0.00110258	357.623	0.00103354
o__Peltigerales	113.907	0.00109901	0	0
o__unclassified_p__Candidatus_Krumholzibacteriota	113.454	0.00109465	93.0275	0.00026885
o__Maricaulales	113.212	0.00109231	5809.93	0.0167908
o__Gemmatimonadales	112.603	0.00108643	1065.2	0.00307845
o__Nautiliales	112.12	0.00108177	378.21	0.00109304
o__Candidatus_Caldarchaeales	111.781	0.00107851	41.8904	0.00012106
o__unclassified_p__Candidatus_Lokiarchaeota	111.378	0.00107462	789.847	0.00228267
o__Perkinsida	110.596	0.00106707	324.352	0.00093738
o__unclassified_p__candidate_division_WWE3	110.49	0.00106604	679.744	0.00196447
o__unclassified_p__Candidatus_Gracilibacteria	109.908	0.00106043	47217.6	0.13646
o__Oligosphaerales	109.887	0.00106023	424.88	0.00122791
o__Candidatus_Hydrogenedentales	109.265	0.00105422	223.576	0.00064614
o__Lepidoptera	107.3	0.00103527	529.361	0.00152987
o__unclassified_p__Candidatus_Goldiibacteriota	106.955	0.00103194	207.042	0.00059836
o__unclassified_p__Candidatus_Muiribacteriota	106.095	0.00102365	153.428	0.00044341
o__Thermoplasmatales	104.268	0.00100602	720.24	0.00208151
o__Steroidobacterales	103.946	0.00100291	927.241	0.00267975
o__Chrysiogenales	99.6908	0.00096185	785.926	0.00227134
o__unclassified_p__candidate_division_FCPU426	99.0208	0.00095539	273.6	0.00079071
o__Oligoflexales	98.014	0.00094567	422.399	0.00122074
o__Mesostigmatales	96.2726	0.00092887	24.1751	6.987e-05
o__Kiritimatiellales	96.2592	0.00092874	682.333	0.00197196
o__unclassified_p__Candidatus_Sungiibacteriota	96.1942	0.00092812	445.934	0.00128876
o__Oculatellales	95.4707	0.00092114	1065.04	0.00307798
o__Hymenostomatida	95.1883	0.00091841	1532.53	0.00442903
o__Helotiales	94.6531	0.00091325	877.515	0.00253604
o__Deferrisomatales	94.5803	0.00091255	115.66	0.00033426
o__unclassified_p__Candidatus_Firestoneibacteriota	94.3103	0.00090994	60.332	0.00017436
o__Candidatus_Promineifilales	93.9694	0.00090665	2589.24	0.00748295
o__Nevskiales	93.5112	0.00090223	1105.98	0.0031963
o__Atribacterales	93.4534	0.00090167	760.236	0.0021971
o__Piccovirales	93.0808	0.00089808	9093.09	0.0262792
o__Candidatus_Peribacterales	92.9639	0.00089695	1184.07	0.00342198
o__Peniculida	91.9099	0.00088678	624.74	0.00180551
o__unclassified_p__Candidatus_Uhrbacteria	90.5302	0.00087347	822.85	0.00237805
o__unclassified_c__Methanomicrobia	90.2345	0.00087062	269.144	0.00077783
o__Nitrospinales	89.6353	0.00086483	1244.61	0.00359694
o__Lamiales	84.6323	0.00081656	0	0
o__Pyrenomonadales	82.5569	0.00079654	676.741	0.0019558
o__Bryobacterales	82.1091	0.00079222	1313.9	0.00379718
o__Gigartinales	81.9917	0.00079109	2581.52	0.00746065
o__Desulfurococcales	78.7011	0.00075934	974.835	0.00281729
o__Archaeoglobales	78.6396	0.00075874	518.966	0.00149982
o__unclassified_p__Candidatus_Thorarchaeota	77.7594	0.00075025	1874.71	0.00541796
o__Dictyosteliales	76.9665	0.0007426	1288.46	0.00372367
o__Candidatus_Aquicultorales	76.3974	0.00073711	239.883	0.00069327
o__unclassified_p__Candidatus_Thermoplasmatota	76.23	0.00073549	1140.21	0.00329522
o__Coleofasciculales	76.1174	0.00073441	313.907	0.0009072
o__unclassified_c__Dothideomycetes	75.5339	0.00072878	113.856	0.00032905
o__Methylacidiphilales	75.2799	0.00072633	211.355	0.00061082
o__Spirulinales	75.1734	0.0007253	303.2	0.00087625
o__unclassified_p__Candidatus_Colwelliibacteriota	74.7874	0.00072158	88.509	0.00025579
o__Candidatus_Fermentibacterales	74.6265	0.00072002	183.44	0.00053015
o__Thermomicrobiales	74.3445	0.0007173	779.993	0.0022542
o__Cantharellales	74.2885	0.00071676	1964.31	0.0056769
o__Mariprofundales	73.942	0.00071342	444.168	0.00128365
o__unclassified_c__Aphelidea	73.5245	0.00070939	454.678	0.00131403
o__Salinisphaerales	73.4352	0.00070853	414.143	0.00119688
o__unclassified_c__Candidatus_Abyssobacteria	73.3834	0.00070803	166.504	0.0004812
o__Eurotiales	73.2424	0.00070667	985.862	0.00284916
o__Prymnesiales	72.9511	0.00070386	198.01	0.00057225
o__Saccharomycetales	72.7878	0.00070228	1368.85	0.00395602
o__unclassified_p__Candidatus_Lithacetigenota	71.9628	0.00069432	130.841	0.00037813
o__Candidatus_Sumerlaeales	71.2141	0.0006871	265.918	0.00076851
o__Pucciniales	71.0935	0.00068594	682.409	0.00197218
o__Scorpiones	70.846	0.00068355	24.9476	7.21e-05
o__Ustilaginales	70.6438	0.0006816	179.577	0.00051898
o__unclassified_c__Actinomycetes	69.3167	0.00066879	937.017	0.002708
o__Nodosilineales	69.0052	0.00066579	735.86	0.00212665
o__unclassified_p__Candidatus_Absconditabacteria	68.9895	0.00066564	3581.35	0.0103502
o__Magnetococcales	67.5151	0.00065141	6301.15	0.0182104
o__Desulfurobacteriales	67.1365	0.00064776	246.626	0.00071276
o__unclassified_p__candidate_division_CSSED10-310	66.7402	0.00064393	546.304	0.00157883
o__Mycosphaerellales	66.6394	0.00064296	499.97	0.00144492
o__Paraglomerales	66.4997	0.00064161	376.772	0.00108888
o__unclassified_c__Opitutia	66.2471	0.00063918	47.9506	0.00013858
o__Pezizales	66.2148	0.00063886	402.546	0.00116337
o__unclassified_c__Candidatus_Hadarchaeia	66.0116	0.0006369	61.249	0.00017701
o__Haliangiales	64.356	0.00062093	512.308	0.00148058
o__Chlorellales	64.2825	0.00062022	15.3841	4.446e-05
o__Limnochordales	63.5197	0.00061286	461.709	0.00133435
o__Nannocystales	62.9545	0.00060741	894.5	0.00258512
o__unclassified_p__Candidatus_Daviesbacteria	62.6746	0.00060471	445.498	0.0012875
o__unclassified_c__Candidatus_Nanoarchaeia	62.322	0.00060131	612.95	0.00177144
o__unclassified_c__Thermococci	62.0449	0.00059863	373.647	0.00107985
o__Thermococcales	61.6922	0.00059523	219.987	0.00063577
o__Diptera	61.6441	0.00059477	1738.2	0.00502342
o__Imitervirales	61.4463	0.00059286	5412.22	0.0156414
o__Eutreptiales	60.4286	0.00058304	134.713	0.00038932
o__Serinales	60.0295	0.00057919	794.807	0.00229701
o__Gonyaulacales	59.5943	0.00057499	285.244	0.00082436
o__Candidatus_Absconditabacterales	59.3188	0.00057233	343.497	0.00099271
o__unclassified_p__Candidatus_Roizmanbacteria	58.5022	0.00056445	308.974	0.00089294
o__Acaryochloridales	57.9907	0.00055952	820.872	0.00237234
o__Arenicellales	57.587	0.00055562	54.5527	0.00015766
o__unclassified_c__Mollicutes	57.3044	0.00055289	235.371	0.00068023
o__unclassified_c__Candidatus_Methanofastidiosia	57.2306	0.00055218	234.761	0.00067846
o__Russulales	56.4964	0.0005451	213.491	0.00061699
o__unclassified_c__Candidatus_Sumerlaeia	56.4391	0.00054455	378.812	0.00109478
o__unclassified_p__Candidatus_Portnoyibacteriota	55.7401	0.0005378	58.0363	0.00016773
o__Vampirovibrionales	55.4186	0.0005347	551.017	0.00159245
o__Motilibacterales	54.8968	0.00052966	514.068	0.00148567
o__Calditrichales	54.1827	0.00052277	274.844	0.00079431
o__unclassified_c__Candidatus_Thermofonsia	54.0288	0.00052129	186.593	0.00053926
o__Xylariales	53.2622	0.00051389	567.231	0.00163931
o__unclassified_p__Candidatus_Magasanikiibacteriota	52.5341	0.00050687	262.958	0.00075996
o__unclassified_p__Candidatus_Shapirobacteria	52.0588	0.00050228	899.723	0.00260022
o__Cryptosporangiales	51.9733	0.00050146	335.164	0.00096863
o__Philasterida	51.6172	0.00049802	149.66	0.00043252
o__unclassified_p__Candidatus_Hydrothermota	50.873	0.00049084	67.1419	0.00019404
o__Tepidisphaerales	50.6235	0.00048843	1076.42	0.00311087
o__Endogonales	50.401	0.00048629	381.881	0.00110364
o__Geitlerinematales	49.6294	0.00047884	400.256	0.00115675
o__Pichiales	49.4361	0.00047698	1002.1	0.00289608
o__unclassified_p__Candidatus_Berkelbacteria	48.919	0.00047199	264.67	0.0007649
o__Candidatus_Uabimicrobiales	48.8637	0.00047145	64.0711	0.00018517
o__unclassified_p__Candidatus_Doudnaibacteriota	48.6736	0.00046962	156.945	0.00045358
o__Sordariales	48.6512	0.0004694	800.906	0.00231464
o__Candidatus_Hinthialibacterales	47.6881	0.00046011	281.786	0.00081437
o__Ichthyophonida	47.0728	0.00045418	1661.96	0.00480309
o__Trueperales	46.8949	0.00045246	232.362	0.00067153
o__Acytosteliales	46.8073	0.00045161	905.021	0.00261553
o__Longamoebia	45.9839	0.00044367	1040.59	0.00300732
o__unclassified_p__Candidatus_Heimdallarchaeota	45.9821	0.00044365	1080.34	0.00312219
o__Immundisolibacterales	44.8884	0.0004331	56.8848	0.0001644
o__Erysiphales	44.8172	0.00043241	219.088	0.00063317
o__unclassified_p__Bacteroidota	43.989	0.00042442	502.498	0.00145223
o__Laminariales	43.7316	0.00042194	188.715	0.00054539
o__Dissulfuribacterales	42.9378	0.00041428	230.478	0.00066609
o__Diaporthales	42.8498	0.00041343	104.081	0.0003008
o__Petitvirales	41.9323	0.00040458	525.59	0.00151897
o__Onygenales	41.8742	0.00040402	302.889	0.00087536
o__unclassified_p__Candidatus_Altarchaeota	40.0675	0.00038659	65.1864	0.00018839
o__Spizellomycetales	40.0283	0.00038621	1656.29	0.00478673
o__Gomontiellales	39.8769	0.00038475	691.726	0.0019991
o__unclassified_p__Heterolobosea	39.8675	0.00038466	428.269	0.00123771
o__unclassified_p__Candidatus_Desantisbacteria	39.7469	0.00038349	1527.08	0.00441328
o__unclassified_p__Candidatus_Gribaldobacteria	38.6317	0.00037273	211.757	0.00061198
o__unclassified_c__Hydrogenophilia	38.4505	0.00037098	394.443	0.00113995
o__Euzebyales	38.4415	0.0003709	828.572	0.00239459
o__unclassified_p__candidate_division_CPR1	38.0502	0.00036712	267.482	0.00077303
o__Candidatus_Ancaeobacterales	37.405	0.0003609	23.8356	6.889e-05
o__Candidatus_Poseidoniales	37.3233	0.00036011	210.577	0.00060857
o__Fabales	36.9575	0.00035658	41.4733	0.00011986
o__Porphyridiales	36.9446	0.00035645	157.922	0.0004564
o__Candidatus_Puniceispirillales	36.8936	0.00035596	1801.52	0.00520644
o__Sporichthyales	36.5979	0.00035311	680.953	0.00196797
o__Thiohalomonadales	36.4969	0.00035214	157.754	0.00045591
o__Candidatus_Altarchaeales	36.0153	0.00034749	385.242	0.00111336
o__Candidatus_Obscuribacterales	35.6713	0.00034417	673.495	0.00194641
o__Gloeomargaritales	35.5736	0.00034323	76.8912	0.00022222
o__Candidatus_Nanosynbacterales	34.6482	0.0003343	95.7147	0.00027662
o__unclassified_p__Cryptomycota	33.8538	0.00032663	914.838	0.0026439
o__Lentisphaerales	33.6795	0.00032495	291.945	0.00084373
o__unclassified_p__Candidatus_Yanofskyibacteriota	33.3443	0.00032172	144.241	0.00041686
o__Candidatus_Termititenacales	33.1079	0.00031944	1358.51	0.00392613
o__Candidatus_Geothermincolales	32.9148	0.00031757	442.055	0.00127755
o__Pimascovirales	32.3576	0.0003122	708.815	0.00204849
o__unclassified_c__Candidatus_Ozemobacteria	32.3124	0.00031176	66.777	0.00019299
o__unclassified_p__Candidatus_Binatota	32.0993	0.00030971	414.605	0.00119822
o__Fimbriimonadales	31.8667	0.00030746	497.839	0.00143876
o__Tepidiformales	31.7618	0.00030645	253.077	0.0007314
o__Parvularculales	31.3673	0.00030264	2001.14	0.00578335
o__unclassified_p__Candidatus_Hinthialibacterota	31.1628	0.00030067	75.3853	0.00021787
o__Vicinamibacterales	30.6829	0.00029604	735.354	0.00212519
o__unclassified_c__Dinophyceae	30.2003	0.00029138	68.4663	0.00019787
o__Ferrovales	29.928	0.00028876	197.315	0.00057024
o__Thermosulfidibacterales	29.8137	0.00028765	27.0811	7.826e-05
o__Cavosteliida	29.6372	0.00028595	729.672	0.00210877
o__unclassified_p__Candidatus_Calescamantes	29.6227	0.00028581	133.063	0.00038456
o__unclassified_p__Candidatus_Caldatribacteriota	29.5091	0.00028471	245.089	0.00070831
o__Dothideales	28.9648	0.00027946	386.763	0.00111775
o__unclassified_p__Candidatus_Levyibacteriota	28.7938	0.00027781	126.045	0.00036427
o__Bradymonadales	28.7794	0.00027767	201.552	0.00058249
o__unclassified_p__Candidatus_Staskawicziibacteriota	28.4731	0.00027472	217.878	0.00062967
o__Geastrales	28.4665	0.00027466	81.8403	0.00023652
o__unclassified_p__Candidatus_Handelsmaniibacteriota	28.2573	0.00027264	362.809	0.00104852
o__Lobulomycetales	27.9436	0.00026961	483.495	0.00139731
o__Mischococcales	27.0957	0.00026143	0.83	2.4e-06
o__Blastocladiales	26.6404	0.00025704	891.395	0.00257615
o__Desulfobaccales	26.0686	0.00025152	2473.98	0.00714985
o__Cladochytriales	25.7129	0.00024809	713.046	0.00206072
o__Boletales	25.6399	0.00024738	247.088	0.00071409
o__unclassified_p__Candidatus_Coatesiibacteriota	25.4123	0.00024519	125.749	0.00036342
o__Salsipaludibacterales	25.3965	0.00024503	359.728	0.00103962
o__Candidatus_Krumholzibacteriales	25.2758	0.00024387	87.0749	0.00025165
o__Methanocellales	25.2657	0.00024377	316.916	0.00091589
o__unclassified_p__Foraminifera	25.162	0.00024277	202.1	0.00058407
o__Candidatus_Palauibacterales	25.0959	0.00024213	239.06	0.00069089
o__unclassified_p__Candidatus_Azambacteria	25.0005	0.00024121	129.324	0.00037375
o__Kalamavirales	24.9459	0.00024069	21.4995	6.213e-05
o__unclassified_c__Chlorarachniophyceae	24.3583	0.00023502	99.6196	0.0002879
o__Thermoproteales	24.3519	0.00023496	70.1932	0.00020286
o__Euglenales	24.1745	0.00023324	9.5405	2.757e-05
o__unclassified_c__Nitrososphaeria	24.1025	0.00023255	131.642	0.00038045
o__Diplomonadida	24.0173	0.00023173	1065.85	0.00308034
o__Naviculales	23.7308	0.00022896	1672.39	0.00483324
o__Sulfolobales	23.627	0.00022796	95.5557	0.00027616
o__Rhizophlyctidales	23.6235	0.00022793	793.027	0.00229186
o__Ceramiales	23.4986	0.00022672	438.985	0.00126868
o__unclassified_c__Cryptophyceae	23.3887	0.00022566	329.042	0.00095094
o__Candidatus_Hakubellales	22.8182	0.00022016	340.322	0.00098354
o__Candelariales	22.4341	0.00021645	48.7642	0.00014093
o__unclassified_p__Candidatus_Fervidibacterota	22.4301	0.00021641	72.2659	0.00020885
o__Hydrogenophilales	22.2376	0.00021456	333.905	0.00096499
o__unclassified_c__Naldaviricetes	22.1508	0.00021372	3968.06	0.0114678
o__unclassified_c__Centroplasthelida	21.7713	0.00021006	261.348	0.0007553
o__Microbotryales	21.7629	0.00020998	39.2269	0.00011337
o__Trypanosomatida	21.4151	0.00020662	182.29	0.00052682
o__Orbiliales	21.1669	0.00020423	403.002	0.00116468
o__Jakobida	21.1386	0.00020395	140.296	0.00040546
o__Candidatus_Acidulodesulfobacterales	21.1369	0.00020394	77.2711	0.00022332
o__Thermoflexales	20.783	0.00020052	168.51	0.000487
o__Physodermatales	20.6867	0.00019959	689.523	0.00199274
o__unclassified_p__Candidatus_Schekmaniibacteriota	20.6602	0.00019934	247.478	0.00071522
o__Botryosphaeriales	20.0569	0.00019352	97.6518	0.00028222
o__Candidatus_Humimicrobiales	19.7512	0.00019057	57.2965	0.00016559
o__unclassified_c__Pelagophyceae	19.7355	0.00019042	73.1916	0.00021153
o__unclassified_c__Archaeoglobi	19.5373	0.0001885	0	0
o__Candidatus_Erginobacterales	19.5331	0.00018846	54.9996	0.00015895
o__Apusomonadida	19.3571	0.00018676	622.729	0.0017997
o__Thraustochytrida	19.2572	0.0001858	255.183	0.00073748
o__Algavirales	19.1071	0.00018435	29.5841	8.55e-05
o__Nitriliruptorales	18.7003	0.00018043	838.295	0.00242269
o__Plasmodiophorida	18.6854	0.00018028	368.743	0.00106568
o__Phaffomycetales	18.522	0.00017871	651.688	0.00188339
o__Galdieriales	18.5042	0.00017854	339.506	0.00098118
o__unclassified_p__Candidatus_Giovannonibacteria	18.3174	0.00017673	10.687	3.089e-05
o__Egibacterales	18.1456	0.00017508	187.441	0.00054171
o__Parmales	17.7422	0.00017118	463.29	0.00133892
o__Venturiales	17.6169	0.00016997	181.328	0.00052404
o__unclassified_p__Candidatus_Fischeribacteriota	17.6012	0.00016982	8.6822	2.509e-05
o__Ectocarpales	17.2786	0.00016671	301.774	0.00087213
o__Woeseiales	17.2746	0.00016667	473.315	0.00136789
o__Pelobiontida	17.2251	0.00016619	379.402	0.00109648
o__Candidatus_Sulfidibacteriales	17.2016	0.00016597	558.936	0.00161534
o__Anaerosomatales	17.1273	0.00016525	150.268	0.00043428
o__Desertifilales	17.123	0.00016521	132.637	0.00038332
o__Ortervirales	17.1181	0.00016516	574.891	0.00166145
o__Phycisphaerales	16.8054	0.00016214	965.736	0.002791
o__Pelagomonadales	16.7111	0.00016123	195.985	0.0005664
o__Mastigamoebida	16.6777	0.00016091	3441.23	0.00994523
o__Candidatus_Fermentithermobacillales	16.6089	0.00016025	548.135	0.00158412
o__Hapalidiales	16.3565	0.00015781	3.4732	1.004e-05
o__unclassified_c__Candidatus_Limnocylindria	16.2488	0.00015677	129.256	0.00037355
o__unclassified_c__Diplonemea	16.097	0.00015531	586.103	0.00169385
o__Thalassiosirales	16.0771	0.00015512	542.939	0.00156911
o__Acanthopleuribacterales	15.9936	0.00015431	366.8	0.00106006
o__unclassified_p__Candidatus_Edwardsiibacteriota	15.9081	0.00015349	274.841	0.0007943
o__Chthonomonadales	15.6601	0.00015109	52.6714	0.00015222
o__Trichomonadida	15.5864	0.00015038	2138.33	0.00617982
o__Schizosaccharomycetales	15.5736	0.00015026	371.998	0.00107508
o__Tilletiales	15.5692	0.00015022	461.272	0.00133309
o__Chattonellales	15.4721	0.00014928	30.8826	8.925e-05
o__Herpesvirales	15.3435	0.00014804	35.6932	0.00010315
o__unclassified_p__Cressdnaviricota	15.1774	0.00014644	1496.78	0.00432573
o__Candidatus_Lernaellales	15.0291	0.00014501	29.9202	8.647e-05
o__unclassified_c__Chytridiomycetes	14.9847	0.00014458	1204.91	0.0034822
o__unclassified_p__Candidatus_Curtissbacteria	14.8682	0.00014345	24.4745	7.073e-05
o__unclassified_c__Candidatus_Marinamargulisbacteria	14.6569	0.00014141	78.5409	0.00022698
o__unclassified_p__Ascomycota	14.6245	0.0001411	167.506	0.0004841
o__Egicoccales	14.5974	0.00014084	190.355	0.00055013
o__Candidatus_Caenarcanales	14.4503	0.00013942	1370.12	0.00395968
o__unclassified_c__Thermomicrobia	14.4299	0.00013923	17.6789	5.109e-05
o__unclassified_p__Fornicata	14.2184	0.00013718	314.06	0.00090764
o__Candidatus_Mcinerneyibacteriales	13.9647	0.00013474	137.752	0.00039811
o__Dictyotales	13.9595	0.00013469	26.4442	7.642e-05
o__Opalinata	13.9279	0.00013438	308.694	0.00089213
o__unclassified_p__Candidatus_Marsarchaeota	13.7823	0.00013298	142.798	0.00041269
o__Cirlivirales	13.5056	0.00013031	0	0
o__unclassified_p__Candidatus_Wolfebacteria	13.1315	0.0001267	49.3515	0.00014263
o__Synchytriales	12.7761	0.00012327	649.867	0.00187813
o__unclassified_p__Chloroflexota	12.5793	0.00012137	22.4422	6.486e-05
o__Polychytriales	12.4356	0.00011998	293.056	0.00084694
o__Olpidiales	12.4315	0.00011994	144.83	0.00041856
o__unclassified_p__Candidatus_Lloydiibacteriota	12.3789	0.00011944	48.8288	0.00014112
o__unclassified_p__Candidatus_Tayloriibacteriota	12.3662	0.00011931	72.0244	0.00020815
o__unclassified_p__Candidatus_Glassiibacteriota	12.3098	0.00011877	318.179	0.00091954
o__Kallotenuales	12.2697	0.00011838	77.5464	0.00022411
o__Filobasidiales	12.112	0.00011686	38.3936	0.00011096
o__unclassified_p__Candidatus_Ratteibacteria	12.0736	0.00011649	81.7446	0.00023624
o__Albuginales	12.0494	0.00011626	106.234	0.00030702
o__unclassified_p__Candidatus_Microgenomates	11.881	0.00011463	70.0717	0.00020251
o__unclassified_p__Armatimonadota	11.829	0.00011413	43.2248	0.00012492
o__unclassified_p__Candidatus_Anderseniibacteriota	11.7786	0.00011364	0	0
o__Rhodellales	11.7388	0.00011326	14.1207	4.081e-05
o__unclassified_c__Sordariomycetes	11.7207	0.00011309	199.559	0.00057673
o__Thermofilales	11.3506	0.00010951	132.323	0.00038242
o__Monoblepharidales	11.2459	0.0001085	717.523	0.00207366
o__Herpetosiphonales	11.2432	0.00010848	92.1615	0.00026635
o__Gloeobacterales	11.197	0.00010803	111.087	0.00032104
o__Bangiales	10.9321	0.00010548	259.874	0.00075104
o__unclassified_p__Candidatus_Zambryskiibacteriota	10.9055	0.00010522	198.02	0.00057228
o__Teloschistales	10.8268	0.00010446	106.748	0.0003085
o__Rotosphaerida	10.791	0.00010411	2739.68	0.00791773
o__Isochrysidales	10.7424	0.00010365	297.918	0.00086099
o__unclassified_p__candidate_division_KD3-62	10.6052	0.00010232	112.134	0.00032407
o__unclassified_p__Candidatus_Liptoniibacteriota	10.5911	0.00010219	77.1552	0.00022298
o__Armatimonadales	10.4943	0.00010125	46.4983	0.00013438
o__Exobasidiales	10.2669	9.906e-05	198.512	0.0005737
o__Tetraodontiformes	9.9898	9.639e-05	68.4627	0.00019786
o__Haemosporida	9.9763	9.625e-05	436.512	0.00126153
o__Acidothermales	9.9515	9.602e-05	201.556	0.0005825
o__Candidatus_Auribacterales	9.9216	9.573e-05	18.3943	5.316e-05
o__Bacillariales	9.7371	9.395e-05	465.061	0.00134404
o__Stylonematales	9.5914	9.254e-05	78.391	0.00022655
o__unclassified_c__Spartobacteria	9.2962	8.969e-05	13.495	3.9e-05
o__Chaetocerotales	9.1795	8.857e-05	279.707	0.00080836
o__Candidatus_Hatepunaeales	9.155	8.833e-05	65.0237	0.00018792
o__Dipodascales	9.116	8.795e-05	907.065	0.00262144
o__Silvanigrellales	9.0818	8.762e-05	206.13	0.00059572
o__Ophiostomatales	9.0371	8.719e-05	7.7332	2.235e-05
o__unclassified_c__Halobacteria	9.0202	8.703e-05	29.5258	8.533e-05
o__Lagenidiales	8.9989	8.682e-05	185.124	0.00053501
o__unclassified_c__Glaucocystophyceae	8.7494	8.442e-05	164.901	0.00047657
o__Thermodesulfobiales	8.6067	8.304e-05	6.2937	1.819e-05
o__unclassified_p__Candidatus_Amesbacteria	8.5802	8.278e-05	37.333	0.00010789
o__Magnaporthales	8.5547	8.254e-05	7.464	2.157e-05
o__Thermoanaerobaculales	8.5141	8.215e-05	727.7	0.00210307
o__Candidatus_Nanoperiomorbales	8.4864	8.188e-05	5.4762	1.583e-05
o__unclassified_c__Kiritimatiellia	8.4151	8.119e-05	125.749	0.00036342
o__unclassified_p__Candidatus_Wildermuthiibacteriota	8.3653	8.071e-05	39.0219	0.00011277
o__unclassified_p__Candidatus_Kryptoniota	8.3244	8.032e-05	219.437	0.00063418
o__Ochromonadales	8.1783	7.891e-05	394.302	0.00113954
o__Picomonadida	8.0081	7.727e-05	26.6808	7.711e-05
o__Candidatus_Desulfofervidales	7.9278	7.649e-05	116.578	0.00033691
o__Candidatus_Berkiellales	7.6052	7.338e-05	13.9193	4.023e-05
o__Eugregarinorida	7.5631	7.297e-05	64.024	0.00018503
o__unclassified_p__Candidatus_Raymondiibacteriota	7.5034	7.24e-05	429.44	0.00124109
o__unclassified_p__Candidatus_Buchananiibacteriota	7.4782	7.215e-05	48.4522	0.00014003
o__Candidatus_Aeolococcales	7.3311	7.073e-05	83.3422	0.00024086
o__unclassified_p__Candidatus_Hermodarchaeota	7.2456	6.991e-05	1.0919	3.16e-06
o__unclassified_p__Candidatus_Effluviviacota	7.2125	6.959e-05	46.8548	0.00013541
o__unclassified_p__Candidatus_Hydrothermarchaeota	7.1937	6.941e-05	0	0
o__Bicosoecida	7.053	6.805e-05	424.233	0.00122604
o__Tribonematales	7.0524	6.804e-05	109.612	0.00031678
o__Chitinivibrionales	7.0286	6.781e-05	39.1981	0.00011328
o__Tritrichomonadida	6.9619	6.717e-05	10.0528	2.905e-05
o__unclassified_p__Candidatus_Lindowiibacteriota	6.9281	6.684e-05	225.477	0.00065163
o__Aulographales	6.8477	6.607e-05	14.1058	4.077e-05
o__Minwuiales	6.7886	6.55e-05	1439.53	0.00416026
o__Plocamiales	6.6337	6.4e-05	24.1798	6.988e-05
o__Caryophyllales	6.4978	6.269e-05	0	0
o__unclassified_c__Cyanophyceae	6.4373	6.211e-05	0	0
o__unclassified_c__Theionarchaea	6.4277	6.202e-05	193.422	0.00055899
o__Peyssonneliales	6.3765	6.152e-05	0.7756	2.24e-06
o__unclassified_p__Candidatus_Yonathiibacteriota	6.3439	6.121e-05	3.3582	9.71e-06
o__Ostropales	6.327	6.105e-05	53.1428	0.00015358
o__unclassified_p__Candidatus_Brockarchaeota	6.312	6.09e-05	12.3772	3.577e-05
o__unclassified_p__Candidatus_Vogeliibacteriota	6.2474	6.028e-05	37.6394	0.00010878
o__Pneumocystales	6.2433	6.024e-05	539.937	0.00156043
o__Sebacinales	6.2409	6.021e-05	81.322	0.00023502
o__Candidatus_Troglogloeales	6.1624	5.946e-05	333.13	0.00096275
o__Lipomycetales	6.1477	5.932e-05	155.69	0.00044995
o__Mytilinidiales	6.121	5.906e-05	0	0
o__Blastocatellales	6.0512	5.838e-05	237.673	0.00068688
o__unclassified_p__Candidatus_Abawacaibacteriota	5.9791	5.769e-05	25.2605	7.3e-05
o__Conexivisphaerales	5.8182	5.614e-05	137.293	0.00039678
o__Cladosporiales	5.772	5.569e-05	29.7463	8.597e-05
o__unclassified_p__candidate_division_CPR2	5.7257	5.524e-05	9.0542	2.617e-05
o__Coyopavirales	5.6884	5.488e-05	10.2009	2.948e-05
o__Thiohalobacterales	5.6306	5.433e-05	140.745	0.00040676
o__Trigonopsidales	5.5745	5.378e-05	29.3271	8.476e-05
o__unclassified_c__Candidatus_Jordarchaeia	5.5595	5.364e-05	676.562	0.00195528
o__unclassified_p__Candidatus_Harrisoniibacteriota	5.4106	5.22e-05	45.92	0.00013271
o__Nemaliales	5.4035	5.213e-05	16.1559	4.669e-05
o__Geoglossales	5.3822	5.193e-05	55.3573	0.00015998
o__Xylonales	5.316	5.129e-05	8.0738	2.333e-05
o__unclassified_p__Candidatus_Pyropristinus	5.3122	5.125e-05	0	0
o__Peridiniales	5.2097	5.027e-05	16.5724	4.789e-05
o__Candidatus_Epilineales	5.1734	4.991e-05	25.9666	7.504e-05
o__Candidatus_Nanopelagicales	5.0484	4.871e-05	234.545	0.00067784
o__Tricladida	5.0441	4.867e-05	0	0
o__Batrachospermales	5.0142	4.838e-05	12.2259	3.533e-05
o__Nebulidida	4.9747	4.8e-05	17.9457	5.186e-05
o__Chitovirales	4.948	4.774e-05	124.239	0.00035905
o__Wallemiales	4.8498	4.679e-05	27.279	7.884e-05
o__Ascoideales	4.8457	4.675e-05	230.1	0.00066499
o__Candidatus_Prometheoarchaeales	4.7709	4.603e-05	69.6745	0.00020136
o__Phototrophicales	4.7377	4.571e-05	160.762	0.00046461
o__Fragilariales	4.7083	4.543e-05	199.267	0.00057588
o__unclassified_p__Candidatus_Helarchaeota	4.7079	4.542e-05	118.569	0.00034267
o__Candidatus_Theseobacterales	4.6399	4.477e-05	45.3608	0.00013109
o__Pavlovales	4.5789	4.418e-05	390.927	0.00112979
o__unclassified_p__Candidatus_Kerfeldiibacteriota	4.5784	4.417e-05	106.18	0.00030686
o__unclassified_p__Candidatus_Jacksoniibacteriota	4.4498	4.293e-05	0	0
o__Trichosporonales	4.4307	4.275e-05	106.632	0.00030817
o__Mononegavirales	4.4301	4.274e-05	3.3798	9.77e-06
o__Galliformes	4.4061	4.251e-05	0	0
o__Microascales	4.3492	4.196e-05	60.5869	0.0001751
o__Dacrymycetales	4.3425	4.19e-05	40.6543	0.00011749
o__unclassified_c__Candidatus_Cloacimonadia	4.3322	4.18e-05	270.091	0.00078057
o__Ardenticatenales	4.3195	4.168e-05	142.754	0.00041256
o__unclassified_p__Candidatus_Parvarchaeota	4.2972	4.146e-05	50.6435	0.00014636
o__unclassified_p__Candidatus_Komeiliibacteriota	4.2931	4.142e-05	86.7829	0.0002508
o__unclassified_p__Candidatus_Jorgensenbacteria	4.2885	4.138e-05	77.4412	0.00022381
o__Candidatus_Tharpellales	4.2269	4.078e-05	97.7989	0.00028264
o__Capsulimonadales	4.225	4.076e-05	24.3918	7.049e-05
o__unclassified_c__Microbotryomycetes	4.222	4.074e-05	70.8239	0.00020468
o__unclassified_p__Candidatus_Blackburniibacteriota	4.176	4.029e-05	22.7908	6.587e-05
o__Thelebolales	4.0989	3.955e-05	23.5751	6.813e-05
o__Candidatus_Bipolaricaulales	4.0832	3.94e-05	245.777	0.0007103
o__Pectinida	4.0588	3.916e-05	4.077	1.178e-05
o__Fucales	4.0345	3.893e-05	8.0688	2.332e-05
o__Glaucosphaerales	3.9589	3.82e-05	0	0
o__Saccharomycodales	3.8511	3.716e-05	579.833	0.00167573
o__Calosphaeriales	3.8421	3.707e-05	0	0
o__Verrucariales	3.7953	3.662e-05	0	0
o__Trypetheliales	3.7731	3.64e-05	20.1401	5.821e-05
o__Decapoda	3.721	3.59e-05	506.996	0.00146523
o__Mytilida	3.664	3.535e-05	0	0
o__Prochlorotrichales	3.631	3.503e-05	0	0
o__Lepetellida	3.6051	3.478e-05	6.1847	1.787e-05
o__unclassified_c__Leotiomycetes	3.5971	3.471e-05	11.8935	3.437e-05
o__Iodidimonadales	3.5394	3.415e-05	133.638	0.00038622
o__Gymnodiniales	3.4069	3.287e-05	0	0
o__Gelidiales	3.3059	3.19e-05	0.6631	1.92e-06
o__unclassified_p__Atribacterota	3.2281	3.115e-05	9.8584	2.849e-05
o__Cyanidiales	3.1931	3.081e-05	144.382	0.00041727
o__Candidatus_Paceibacterales	3.1492	3.038e-05	9.6558	2.791e-05
o__unclassified_p__Ciliophora	3.1407	3.03e-05	0	0
o__Kangiellales	3.1103	3.001e-05	446.366	0.00129001
o__Gomphales	3.0433	2.936e-05	51.237	0.00014808
o__Candidatus_Dormibacterales	3.0279	2.921e-05	274.244	0.00079257
o__unclassified_p__Candidatus_Woykeibacteriota	3.0059	2.9e-05	0	0
o__Candidatus_Nanogingivales	2.9713	2.867e-05	247.29	0.00071467
o__Cypriniformes	2.9589	2.855e-05	183.553	0.00053047
o__Abditibacteriales	2.95	2.846e-05	25.2146	7.287e-05
o__Lecanorales	2.8475	2.747e-05	17.1802	4.965e-05
o__Acarosporales	2.8456	2.746e-05	0	0
o__Candidatus_Micrarchaeales	2.8369	2.737e-05	263.474	0.00076145
o__unclassified_c__Gastropoda	2.7932	2.695e-05	20.7096	5.985e-05
o__unclassified_c__Megaviricetes	2.7505	2.654e-05	0	0
o__Piroplasmida	2.7455	2.649e-05	516.777	0.0014935
o__Candidatus_Nanosyncoccales	2.7429	2.646e-05	8.437	2.438e-05
o__Bartheletiales	2.6821	2.588e-05	0	0
o__Hymenoptera	2.6597	2.566e-05	376.081	0.00108688
o__Brassicales	2.6063	2.515e-05	0.7858	2.27e-06
o__unclassified_p__Candidatus_Collierbacteria	2.6047	2.513e-05	121.86	0.00035218
o__Vaucheriales	2.5538	2.464e-05	6.5394	1.89e-05
o__Pinales	2.5104	2.422e-05	11.6484	3.366e-05
o__Togniniales	2.4788	2.392e-05	0	0
o__Candidatus_Hodarchaeales	2.4779	2.391e-05	152.171	0.00043978
o__Diplostraca	2.4427	2.357e-05	63.29	0.00018291
o__Jaapiales	2.3964	2.312e-05	0	0
o__Candidatus_Methanoliparales	2.389	2.305e-05	36.28	0.00010485
o__unclassified_p__Candidatus_Campbellbacteria	2.3681	2.285e-05	25.4488	7.355e-05
o__Methanonatronarchaeales	2.3647	2.282e-05	2.4127	6.97e-06
o__Cephalothecales	2.3127	2.231e-05	0	0
o__Primates	2.2652	2.186e-05	8.5092	2.459e-05
o__Candidatus_Gugararchaeales	2.2622	2.183e-05	0	0
o__unclassified_p__Candidatus_Terryibacteriota	2.2439	2.165e-05	3.7541	1.085e-05
o__Goniochloridales	2.1977	2.12e-05	0	0
o__Macrostomida	2.173	2.097e-05	86.477	0.00024992
o__Kriegeriales	2.1249	2.05e-05	16.6709	4.818e-05
o__unclassified_p__Haptophyta	2.0937	2.02e-05	0	0
o__Limoida	2.0803	2.007e-05	0	0
o__Sporidiobolales	2.076	2.003e-05	369.379	0.00106751
o__Candidatus_Elulimicrobiales	1.9775	1.908e-05	37.3478	0.00010794
o__Candidatus_Culexarchaeles	1.9646	1.895e-05	6.0909	1.76e-05
o__Nanoarchaeales	1.8552	1.79e-05	260.072	0.00075161
o__Candidatus_Asgardarchaeales_(ex_Tamarit_et_al._2024)	1.8335	1.769e-05	1088.33	0.0031453
o__unclassified_p__Candidatus_Beckwithbacteria	1.8014	1.738e-05	86.0207	0.0002486
o__Trapeliales	1.7577	1.696e-05	17.9386	5.184e-05
o__Araneae	1.7386	1.677e-05	23.6021	6.821e-05
o__Cystofilobasidiales	1.7231	1.663e-05	4.5103	1.303e-05
o__Malasseziales	1.7206	1.66e-05	151.127	0.00043676
o__unclassified_c__Candidatus_Nanohaloarchaea	1.6923	1.633e-05	15.4057	4.452e-05
o__Caliciales	1.6829	1.624e-05	10.3003	2.977e-05
o__unclassified_c__Echinamoebida	1.6427	1.585e-05	0	0
o__Physariida	1.6413	1.584e-05	18.5506	5.361e-05
o__Gloeophyllales	1.6401	1.582e-05	14.1231	4.082e-05
o__Funariales	1.5999	1.544e-05	0	0
o__Syndiniales	1.5726	1.517e-05	194.507	0.00056213
o__Thermogemmatisporales	1.4896	1.437e-05	85.9361	0.00024836
o__unclassified_c__Variosea	1.4586	1.407e-05	0	0
o__unclassified_p__Preaxostyla	1.4552	1.404e-05	123.977	0.0003583
o__Rhizocarpales	1.4156	1.366e-05	10.211	2.951e-05
o__unclassified_p__Halobacteriota	1.4026	1.353e-05	726.71	0.00210021
o__Vezdaeales	1.3452	1.298e-05	0	0
o__Neolectales	1.2195	1.177e-05	53.2125	0.00015379
o__Eunotiales	1.2003	1.158e-05	62.5352	0.00018073
o__Acrospermales	1.0917	1.053e-05	12.9929	3.755e-05
o__unclassified_k__Heunggongvirae	0.9924	9.57e-06	169.017	0.00048846
o__unclassified_p__Candidatus_Ryaniibacteriota	0.9086	8.77e-06	351.166	0.00101488
o__Candidatus_Zymogeniales	0.8948	8.63e-06	8.3374	2.41e-05
o__Futianiales	0.848	8.18e-06	610.347	0.00176392
o__Candidatus_Aminicenantales	0.8444	8.15e-06	36.2572	0.00010478
o__Taphrinales	0.7576	7.31e-06	47.3038	0.00013671
o__Capnodiales	0.7354	7.1e-06	16.7627	4.844e-05
o__Pertusariales	0.6909	6.67e-06	14.758	4.265e-05
o__Melosirales	0.6886	6.64e-06	194.728	0.00056277
o__Testudines	0.6514	6.28e-06	0	0
o__Coniochaetales	0.6246	6.03e-06	29.3436	8.48e-05
o__Arthoniales	0.5782	5.58e-06	19.0022	5.492e-05
o__unclassified_c__Candidatus_Poseidoniia	0.544	5.25e-06	185.447	0.00053594
o__Thermostichales	0.3865	3.73e-06	9.7041	2.804e-05
o__Candidatus_Actinomarinales	0.3438	3.32e-06	367.646	0.0010625
o__Candidatus_Alkanophagales	0.2826	2.73e-06	39.5613	0.00011433
o__Paraliales	0.1771	1.71e-06	665.911	0.0019245
o__Cymbellales	0.0933	9e-07	108.7	0.00031415
o__Trechisporales	0	0	24.5385	7.092e-05
o__Candidatus_Tariuqbacterales	0	0	10.0992	2.919e-05
o__unclassified_c__Anaerolineae	0	0	45.7817	0.00013231
o__Entylomatales	0	0	24.4453	7.065e-05
o__Xylobotryales	0	0	3.4632	1.001e-05
o__Candidatus_Spechtbacterales	0	0	0	0
o__Eupodiscales	0	0	0.5829	1.68e-06
o__Eubodonida	0	0	22.781	6.584e-05
o__Candidatus_Thermoprofundales	0	0	54.5751	0.00015772
o__Tichowtungiales	0	0	131.742	0.00038074
o__Thoracosphaerales	0	0	5.5327	1.599e-05
o__Thiohalospirales	0	0	17.4914	5.055e-05
o__Coleoptera	0	0	156.47	0.0004522
o__Triceratiales	0	0	25.3786	7.334e-05
o__Erythropeltidales	0	0	12.3722	3.576e-05
o__Dermocystida	0	0	27.5566	7.964e-05
o__Candidatus_Proteinoplasmatales	0	0	30.9024	8.931e-05
o__Dermaptera	0	0	1.9645	5.68e-06
o__Cyphobasidiales	0	0	33.7148	9.744e-05
o__Patellariales	0	0	22.2435	6.428e-05
o__Candidatus_Nitrosocaldales	0	0	16.4999	4.769e-05
o__Candidatus_Nemesobacterales	0	0	43.0657	0.00012446
o__Candidatus_Odinarchaeales	0	0	2.4468	7.07e-06
o__Candidatus_Polarisedimenticolales	0	0	42.8205	0.00012375
o__Opisthorchiida	0	0	17.4617	5.046e-05
o__Orthoptera	0	0	19.7484	5.707e-05
o__Blubervirales	0	0	2.1561	6.23e-06
o__Atheliales	0	0	49.4315	0.00014286
o__Atractiellales	0	0	47.3939	0.00013697
o__Auriculariales	0	0	126.212	0.00036476
o__Alaninales	0	0	135.485	0.00039156
o__unclassified_p__Candidatus_Wirthbacteria	0	0	45.869	0.00013256
o__Anaulales	0	0	18.0424	5.214e-05
o__Amarillovirales	0	0	23.0392	6.658e-05
o__unclassified_p__Candidatus_Nezhaarchaeota	0	0	13.2446	3.828e-05
o__Candidatus_Cenarchaeales	0	0	17.9349	5.183e-05
o__Jingchuvirales	0	0	421.769	0.00121892
o__Hemiaulales	0	0	17.2239	4.978e-05
o__Candidatus_Borrarchaeales	0	0	15.0283	4.343e-05
o__Candidatus_Anaeroferrophillales	0	0	8.8036	2.544e-05
o__Myriangiales	0	0	511.782	0.00147906
o__Violaceomycetales	0	0	79.4253	0.00022954
o__Candidatus_Mnemosynellales	0	0	12.6089	3.644e-05
o__Natronospirales	0	0	0	0
o__Nephromycida	0	0	32.46	9.381e-05
o__Eremomycetales	0	0	4.8957	1.415e-05
o__unclassified_c__Candidatus_Methanomethylicia	0	0	119.993	0.00034678
o__unclassified_c__Candidatus_Micrarchaeia	0	0	20.611	5.957e-05
o__unclassified_c__Bacillariophyceae	0	0	166.143	0.00048016
o__unclassified_c__Coscinodiscophyceae	0	0	7.5001	2.168e-05
o__unclassified_c__Methanococci	0	0	3.5284	1.02e-05
o__Phaeotrichales	0	0	8.9346	2.582e-05
o__Phallales	0	0	7.6632	2.215e-05
o__unclassified_c__Candidatus_Lokiarchaeia	0	0	477.517	0.00138003
o__unclassified_c__Elusimicrobia	0	0	13.3523	3.859e-05
o__unclassified_c__Kinetoplastea	0	0	12.0467	3.482e-05
o__unclassified_c__Nitrospiria	0	0	57.3483	0.00016574
o__Phaeomoniellales	0	0	4.3583	1.26e-05
o__Sarrameanales	0	0	16.6355	4.808e-05
o__Sareales	0	0	8.1224	2.347e-05
o__Cercomonadida	0	0	12.6508	3.656e-05
o__Ceraceosorales	0	0	19.224	5.556e-05
o__Caulochytriales	0	0	53.9931	0.00015604
o__Thelephorales	0	0	61.2791	0.0001771
o__Chaetosphaeriales	0	0	21.6575	6.259e-05
o__Chitinispirillales	0	0	37.9004	0.00010953
o__Candidatus_Jingweiarchaeales	0	0	8.5757	2.478e-05
o__Mixiales	0	0	25.0996	7.254e-05
o__unclassified_k__Fungi	0	0	22.8266	6.597e-05
o__Georgefischeriales	0	0	263.073	0.00076029
o__Glaucocystales	0	0	41.6101	0.00012025
o__Methylohalomonadales	0	0	46.5227	0.00013445
o__Microstromatales	0	0	20.8293	6.02e-05
o__Candidatus_Hecatellales	0	0	6.2271	1.8e-05
o__Candidatus_Electryoneales	0	0	47.3411	0.00013682
o__Thermotomaculales	0	0	20.89	6.037e-05
o__Thiohalorhabdales	0	0	64.3566	0.00018599
o__Venerida	0	0	5.86	1.694e-05
o__Phlebobranchia	0	0	35.9793	0.00010398
o__Lichinales	0	0	10.3092	2.979e-05
o__Lineolatales	0	0	12.7561	3.687e-05
o__Candidatus_Tritonobacterales	0	0	19.3471	5.591e-05
o__Leptocylindrales	0	0	44.3348	0.00012813
o__Mesoaciditogales	0	0	272.966	0.00078888
o__Malpighiales	0	0	49.5362	0.00014316
o__unclassified_p__Candidatus_Fraseribacteriota	0	0	8.0272	2.32e-05
o__Lithodesmiales	0	0	56.272	0.00016263
o__unclassified_p__Candidatus_Gerdarchaeota	0	0	17.381	5.023e-05
o__unclassified_p__Candidatus_Geothermarchaeota	0	0	7.855	2.27e-05
o__Scleralcyonacea	0	0	83.0084	0.0002399
o__Priklausovirales	0	0	36.6108	0.00010581
o__Cymatosirales	0	0	0.703	2.03e-06
o__Cycadales	0	0	95.6562	0.00027645
o__Salmoniformes	0	0	81.6513	0.00023597
o__Rowavirales	0	0	729.949	0.00210957
o__Rosales	0	0	6.2699	1.812e-05
o__Rodentia	0	0	16.8976	4.883e-05
o__Rhodothalassiales	0	0	102.407	0.00029596
o__unclassified_p__Candidatus_Blackallbacteria	0	0	48.6167	0.0001405
o__Leucosporidiales	0	0	58.1496	0.00016805
o__Cryptomonadales	0	0	22.3663	6.464e-05
o__Coscinodiscales	0	0	19.9653	5.77e-05
o__Corticiales	0	0	7.0504	2.038e-05
o__Coniocybales	0	0	65.8369	0.00019027
o__Ramicandelaberales	0	0	97.7708	0.00028256
o__Rhizosoleniales	0	0	61.5405	0.00017785
o__unclassified_p__Candidatus_Chisholmiibacteriota	0	0	22.5637	6.521e-05
o__unclassified_p__Candidatus_Spechtiibacteriota	0	0	7.298	2.109e-05
o__unclassified_p__Candidatus_Niyogiibacteriota	0	0	15.5385	4.491e-05
o__Cucurbitales	0	0	7.8374	2.265e-05
o__Acanthoecida	0	0	6.5375	1.889e-05
o__Ahnfeltiales	0	0	18.2497	5.274e-05
o__unclassified_p__candidate_division_LCP-89	0	0	139.879	0.00040425
o__Acidilobales	0	0	9.8964	2.86e-05
o__unclassified_p__Nucleocytoviricota	0	0	34.6804	0.00010023
o__Artiodactyla	0	0	17.147	4.956e-05
o__unclassified_p__Verrucomicrobiota	0	0	225.975	0.00065307
o__Adinetida	0	0	5.1348	1.484e-05
o__unclassified_p__Candidatus_Kuenenbacteria	0	0	34.8614	0.00010075
o__unclassified_p__Candidatus_Mcinerneyibacteriota	0	0	1.3182	3.81e-06
o__unclassified_p__Candidatus_Methanomethylicota	0	0	16.5191	4.774e-05
o__Candidatus_Chloroheliales	0	0	26.4158	7.634e-05
Total Classified (Sum)	1.03645e+07	100	3.46018e+07	100

## Sheet: Family
Family	FM_RPKM_Value	FM_Ratio (%)	FC_RPKM_Value	FC_Ratio (%)
f__Lachnospiraceae	2.11857e+06	20.4407	1.80271e+06	5.20987
f__Oscillospiraceae	1.29237e+06	12.4692	2.44672e+06	7.07107
f__Erysipelotrichaceae	1.19949e+06	11.5731	4.75113e+06	13.7309
f__Clostridiaceae	727471	7.01891	3.08668e+06	8.92056
f__Desulfovibrionaceae	678359	6.54506	2.50816e+06	7.24863
f__Methanobacteriaceae	673956	6.50257	239881	0.69326
f__unclassified_p__Bacillota	370840	3.578	138159	0.399283
f__Coprobacillaceae	279033	2.69221	760944	2.19914
f__unclassified_o__Eubacteriales	190906	1.84193	651034	1.8815
f__Bacteroidaceae	153198	1.47811	915238	2.64506
f__Hafniaceae	150641	1.45344	6577.32	0.0190086
f__unclassified_c__Caudoviricetes	134975	1.30229	1.08308e+06	3.13012
f__Eubacteriaceae	133142	1.2846	311231	0.899463
f__Akkermansiaceae	84545.6	0.815727	83115.9	0.240207
f__Enterobacteriaceae	81755.5	0.788807	289666	0.837142
f__Acutalibacteraceae	78003.4	0.752605	167004	0.482646
f__Tannerellaceae	77692.9	0.749609	280709	0.811256
f__Nocardioidaceae	73495.9	0.709115	132648	0.383354
f__Anaerovoracaceae	72153.6	0.696164	186567	0.539182
f__Butyricicoccaceae	71417.1	0.689058	92299.8	0.266748
f__Mucispirillaceae	67157.7	0.647962	52262.8	0.15104
f__Peptostreptococcaceae	64980.2	0.626953	695862	2.01106
f__Nitrososphaeraceae	61823.8	0.596498	396562	1.14607
f__Christensenellaceae	61031.2	0.588851	486910	1.40718
f__Anaerotignaceae	58261.1	0.562124	208756	0.60331
f__Bacillaceae	57619.4	0.555933	202415	0.584984
f__Paenibacillaceae	57413.2	0.553944	107983	0.312074
f__Eggerthellaceae	49937.3	0.481814	123521	0.356978
f__Treponemataceae	48781.9	0.470666	123264	0.356235
f__unclassified_c__Clostridia	43614.8	0.420811	60088.8	0.173658
f__Enterococcaceae	43335.4	0.418115	71195.3	0.205756
f__Rikenellaceae	35008.9	0.337778	905258	2.61621
f__Microbacteriaceae	33682	0.324976	75176.4	0.217261
f__unclassified_c__Tissierellia	26028.8	0.251135	73723.7	0.213063
f__Micromonosporaceae	25254.7	0.243667	49343.8	0.142605
f__Desulfitobacteriaceae	22007.4	0.212336	50013.3	0.14454
f__Nostocaceae	18639.5	0.179841	2895.03	0.00836671
f__Eubacteriales_Family_XIII._Incertae_Sedis	18572.5	0.179194	53288.2	0.154004
f__unclassified_c__Bacilli	18032.5	0.173984	236313	0.682951
f__Acidaminococcaceae	16048	0.154837	21933	0.0633867
f__Sporomusaceae	15968.3	0.154068	35796.6	0.103453
f__Sphingomonadaceae	15486.2	0.149416	66756.2	0.192927
f__Brevinemataceae	14767.9	0.142486	57633.3	0.166561
f__Cellulosilyticaceae	13824.1	0.133379	27668.8	0.0799634
f__Fusobacteriaceae	12529.9	0.120893	299654	0.866005
f__Tissierellaceae	11672.7	0.112622	72960.1	0.210856
f__Streptococcaceae	11580.9	0.111737	41702.3	0.120521
f__unclassified_d__Viruses	11540.4	0.111346	91205.3	0.263585
f__Pseudonocardiaceae	11428.3	0.110264	143201	0.413855
f__Nitrobacteraceae	11166.4	0.107738	412198	1.19126
f__Peptococcaceae	10923.9	0.105398	87816.1	0.25379
f__Aminobacteriaceae	10187.3	0.0982908	78789.1	0.227702
f__Peptoniphilaceae	9963.05	0.0961271	29101.5	0.084104
f__unclassified_d__Archaea	9880.12	0.095327	9475.81	0.0273853
f__Selenomonadaceae	9226.74	0.0890229	41288	0.119323
f__Prevotellaceae	9087.5	0.0876795	59742.7	0.172658
f__Thermoanaerobacteraceae	9018.9	0.0870176	17998.6	0.0520163
f__Chroococcidiopsidaceae	8893.63	0.085809	2328.37	0.00672904
f__Propionibacteriaceae	8391.48	0.080964	16398.3	0.0473914
f__Intrasporangiaceae	8153.17	0.0786648	30803	0.0890212
f__Mycoplasmataceae	8073.96	0.0779005	85827.7	0.248044
f__Odoribacteraceae	8046.73	0.0776378	132323	0.382415
f__Listeriaceae	7895.82	0.0761817	26502.7	0.0765934
f__unclassified_p__Euryarchaeota	7714.7	0.0744342	2114.21	0.00611011
f__Flavobacteriaceae	7707.92	0.0743688	67774.8	0.195871
f__Geovibrionaceae	7628.49	0.0736025	6554.5	0.0189426
f__Synergistaceae	7521.91	0.0725741	42343	0.122372
f__Carnobacteriaceae	7313.87	0.0705669	18440.3	0.0532928
f__Paracoccaceae	7134.39	0.0688352	230013	0.664742
f__unclassified_p__Mycoplasmatota	7080.86	0.0683187	307594	0.888954
f__Natronincolaceae	6956.36	0.0671175	24524.2	0.0708755
f__Desulfomicrobiaceae	6774.58	0.0653636	35621.2	0.102946
f__Veillonellaceae	6601.14	0.0636902	41899	0.121089
f__Mycobacteriaceae	6564.2	0.0633337	657662	1.90066
f__Vallitaleaceae	6276.93	0.0605621	21644	0.0625517
f__Thermotaleaceae	6149.63	0.0593339	26915.1	0.0777853
f__Streptomycetaceae	6041.75	0.058293	46996.8	0.135822
f__Dysgonomonadaceae	5878.31	0.056716	43842.4	0.126705
f__Leptotrichiaceae	5859.35	0.0565331	13311.7	0.0384712
f__Syntrophomonadaceae	5735.73	0.0553404	7966.09	0.0230222
f__Solirubrobacteraceae	5597.6	0.0540077	47240.2	0.136525
f__Neisseriaceae	5595.19	0.0539845	4726.83	0.0136606
f__Brachyspiraceae	5425.15	0.0523439	72051.3	0.20823
f__Muribaculaceae	5214.07	0.0503072	26314.7	0.0760501
f__Basidiobolaceae	5210.04	0.0502683	762.594	0.00220391
f__Pseudomonadaceae	5194.68	0.0501201	288629	0.834145
f__Lactobacillaceae	5065.15	0.0488704	27079.8	0.0782612
f__Mycoplasmoidaceae	5004.22	0.0482825	115622	0.33415
f__Comamonadaceae	4967.51	0.0479283	19291.6	0.0557531
f__Eubacteriales_Family_XII._Incertae_Sedis	4957.59	0.0478326	7756.05	0.0224151
f__Deferribacteraceae	4922.34	0.0474925	3048.75	0.00881096
f__Turicibacteraceae	4778.63	0.0461059	23356.7	0.0675012
f__Burkholderiaceae	4679.97	0.0451541	26357.4	0.0761735
f__Desulfotomaculaceae	4632.74	0.0446984	11722.1	0.033877
f__Staphylococcaceae	4557.26	0.0439701	42137.4	0.121778
f__unclassified_o__Nitrosopumilales	4379.25	0.0422525	3937.41	0.0113792
f__unclassified_p__Candidatus_Saccharibacteria	4293.12	0.0414215	17539.1	0.0506883
f__Vibrionaceae	4208.14	0.0406017	858479	2.48102
f__unclassified_o__Bacteroidales	4108.8	0.0396432	52692.8	0.152283
f__Desulfobulbaceae	3914.66	0.03777	19125.4	0.0552728
f__Phyllobacteriaceae	3852.36	0.037169	251669	0.727328
f__Methylobacteriaceae	3775.03	0.0364229	27415.3	0.0792307
f__Dethiosulfovibrionaceae	3700.89	0.0357076	15005.7	0.0433669
f__Hyphomicrobiaceae	3653.82	0.0352534	766870	2.21627
f__Thermohalobacteraceae	3653.2	0.0352474	11582.5	0.0334736
f__Gaiellaceae	3644.65	0.035165	50356.5	0.145531
f__Filifactoraceae	3642.59	0.035145	191442	0.553273
f__Oxalobacteraceae	3548.82	0.0342403	13059.1	0.0377412
f__Planococcaceae	3507.41	0.0338408	16055.1	0.0463995
f__Methanosarcinaceae	3483.69	0.0336119	14124	0.0408186
f__Entrophosporaceae	3475.52	0.0335331	7957.96	0.0229987
f__Lutisporaceae	3408.22	0.0328837	12338	0.0356572
f__Candidatus_Paracaedibacteraceae	3395.89	0.0327648	37911.8	0.109566
f__Rhizobiaceae	3395.26	0.0327587	67797	0.195935
f__unclassified_o__Methanobacteriales	3389.19	0.0327001	32.8112	9.483e-05
f__unclassified_p__Candidatus_Omnitrophota	3348.95	0.0323119	12838.9	0.0371048
f__Desulfosarcinaceae	3310.25	0.0319385	14516.4	0.0419528
f__Caminicellaceae	3272.6	0.0315752	13579.2	0.0392442
f__Calditerrivibrionaceae	3268.73	0.0315379	2044.32	0.00590812
f__Anaerolineaceae	3208.24	0.0309542	10724	0.0309927
f__Moraxellaceae	3160.08	0.0304896	24214.7	0.069981
f__Sphaerochaetaceae	3159.64	0.0304854	9954.42	0.0287685
f__Peronosporaceae	3143.31	0.0303278	2205.51	0.00637396
f__Porphyromonadaceae	3128.02	0.0301803	28393.2	0.0820569
f__Ilumatobacteraceae	3106.55	0.0299731	15545	0.0449255
f__Rubrobacteraceae	3051.96	0.0294464	12391.1	0.0358104
f__unclassified_o__Candidatus_Gastranaerophilales	2971.19	0.0286671	11330.4	0.032745
f__Conexibacteraceae	2920.59	0.0281789	54888.7	0.158629
f__Candidatus_Adiutricaceae	2911.97	0.0280957	10013	0.0289378
f__Lysobacteraceae	2884.64	0.0278321	11448.2	0.0330856
f__Bianqueaceae	2868.66	0.0276779	4430.28	0.0128036
f__Cucurbitariaceae	2802.79	0.0270423	41.2107	0.0001191
f__Acholeplasmataceae	2780.51	0.0268273	84069.6	0.242963
f__Sphingobacteriaceae	2705.24	0.0261012	18847.1	0.0544684
f__Rhodospirillaceae	2701.76	0.0260676	40999.4	0.118489
f__Coriobacteriaceae	2636.68	0.0254397	11559.3	0.0334066
f__Bifidobacteriaceae	2623.63	0.0253138	7202.23	0.0208146
f__Schistosomatidae	2562.49	0.0247239	341.436	0.00098676
f__Zhaonellaceae	2526.48	0.0243764	3381.57	0.00977281
f__Deferrivibrionaceae	2476.87	0.0238977	1306.03	0.00377445
f__Chitinophagaceae	2453.01	0.0236675	36638.5	0.105886
f__Azospirillaceae	2407.58	0.0232292	31257.2	0.090334
f__Moorellaceae	2352.17	0.0226946	11022.2	0.0318544
f__Methanomassiliicoccaceae	2343.12	0.0226073	2348.11	0.0067861
f__Xanthobacteraceae	2340.82	0.0225851	126669	0.366075
f__Defluviitaleaceae	2319.14	0.0223759	4229.5	0.0122233
f__Feifaniaceae	2293.64	0.0221299	6387.92	0.0184612
f__Weeksellaceae	2277.3	0.0219722	36243.9	0.104746
f__Tepidanaerobacteraceae	2249.73	0.0217062	6818.29	0.019705
f__Paludibacteraceae	2181.51	0.021048	23190.8	0.067022
f__Campylobacteraceae	2162.89	0.0208684	7119.71	0.0205761
f__Flexistipitaceae	2136.34	0.0206122	1511.75	0.004369
f__Acetobacteraceae	2134.11	0.0205906	26303.4	0.0760174
f__unclassified_p__Candidatus_Aminicenantota	2087.16	0.0201376	11499.8	0.0332348
f__Saprolegniaceae	2084.58	0.0201128	4350.31	0.0125725
f__Monoglobaceae	2068.16	0.0199543	8688.99	0.0251114
f__Breznakiellaceae	2058.92	0.0198652	3927.21	0.0113497
f__Spirochaetaceae	2053.21	0.0198101	11183.1	0.0323194
f__unclassified_c__Candidatus_Hydrothermia	2007.46	0.0193687	14.3829	4.157e-05
f__unclassified_o__Bacillales	1980.07	0.0191045	21954.8	0.0634498
f__Helicobacteraceae	1957.73	0.0188889	7672.77	0.0221745
f__unclassified_o__Candidatus_Acidiferrales	1952.28	0.0188363	22102.5	0.0638766
f__Geobacteraceae	1944.14	0.0187578	7711.69	0.0222869
f__Sporolactobacillaceae	1916.97	0.0184956	3080.79	0.00890355
f__Gottschalkiaceae	1916.01	0.0184863	4762.07	0.0137625
f__Nocardiaceae	1901.06	0.0183421	32331.7	0.0934394
f__unclassified_c__Betaproteobacteria	1893.73	0.0182714	8517.46	0.0246156
f__unclassified_p__Candidatus_Paceibacterota	1872.97	0.0180711	6406.99	0.0185163
f__Glomeraceae	1856.96	0.0179167	9125.05	0.0263716
f__Zoogloeaceae	1827.37	0.0176311	7873.88	0.0227557
f__Petrotogaceae	1814.71	0.0175089	2910.69	0.00841196
f__Sporanaerobacteraceae	1814.4	0.0175059	12876.7	0.0372138
f__Tepidimicrobiaceae	1783.61	0.0172089	6704.42	0.0193759
f__Yersiniaceae	1775.05	0.0171263	8029.78	0.0232062
f__Alcaligenaceae	1717.45	0.0165706	9851.77	0.0284718
f__Culicoidibacteraceae	1707.44	0.016474	1885.71	0.00544975
f__Iamiaceae	1694.72	0.0163512	55454.7	0.160265
f__Desulfobacteraceae	1686.1	0.0162681	7519.61	0.0217318
f__Aerococcaceae	1680.71	0.0162161	10237.3	0.0295859
f__Polydnaviriformidae	1671.76	0.0161298	345.741	0.0009992
f__Endomicrobiaceae	1655.34	0.0159713	15684.4	0.0453283
f__Baekduiaceae	1582.31	0.0152667	25093	0.0725193
f__Thermoactinomycetaceae	1580.31	0.0152474	2888.42	0.0083476
f__Xylanivirgaceae	1578.04	0.0152255	5262.23	0.0152079
f__unclassified_p__Candidatus_Hydrogenedentota	1564.33	0.0150933	9523.24	0.0275224
f__unclassified_p__Candidatus_Neomarinimicrobiota	1560.38	0.0150551	7969.48	0.023032
f__unclassified_d__Bacteria	1521.94	0.0146842	7818.61	0.022596
f__Pasteurellaceae	1493.15	0.0144064	7787.1	0.0225049
f__Natranaerovirgaceae	1489.14	0.0143678	1525.07	0.0044075
f__Methylococcaceae	1449.91	0.0139892	6607.28	0.0190952
f__Rhizopodaceae	1441.95	0.0139124	4105.71	0.0118656
f__Pleosporaceae	1440.03	0.0138939	183.604	0.00053062
f__Terrimicrobiaceae	1439.22	0.0138861	4732.48	0.013677
f__Rhodocyclaceae	1432.65	0.0138227	3640.6	0.0105214
f__Streptosporangiaceae	1426.79	0.0137661	6462.1	0.0186756
f__unclassified_o__Candidatus_Saccharimonadales	1421.5	0.0137152	8392.32	0.024254
f__Budviciaceae	1382.39	0.0133378	3779.42	0.0109226
f__unclassified_o__Erysipelotrichales	1379.65	0.0133114	434.207	0.00125487
f__Roseobacteraceae	1375.33	0.0132696	128484	0.371323
f__unclassified_p__Candidatus_Cloacimonadota	1366.79	0.0131872	7319.96	0.0211548
f__Sedimenticolaceae	1352.1	0.0130455	5847.77	0.0169002
f__Chlorobotryaceae	1337.66	0.0129062	143.655	0.00041517
f__Erwiniaceae	1337.54	0.0129051	3315.52	0.00958191
f__unclassified_o__Burkholderiales	1319.44	0.0127305	3390.62	0.00979897
f__Barnesiellaceae	1317.16	0.0127085	29252.7	0.0845409
f__Candidatus_Bathycorpusculaceae	1312.22	0.0126607	993.241	0.00287049
f__Morganellaceae	1277.57	0.0123265	11456.7	0.0331102
f__Succinivibrionaceae	1274.99	0.0123015	4941.01	0.0142796
f__Atopobiaceae	1272.73	0.0122798	3020.92	0.00873051
f__Chromobacteriaceae	1270.42	0.0122575	3125.9	0.00903392
f__Halomonadaceae	1263.1	0.0121869	5465.04	0.0157941
f__Candidatus_Pelagibacteraceae	1263.09	0.0121868	6706.06	0.0193806
f__unclassified_p__Microsporidia	1254.03	0.0120993	186130	0.537919
f__Galeropsidaceae	1247.87	0.0120399	0	0
f__Acidaminobacteraceae	1235.27	0.0119183	3348.94	0.0096785
f__Methanocorpusculaceae	1211.68	0.0116908	2796.18	0.00808103
f__Desulfallaceae	1188.01	0.0114623	2885.52	0.0083392
f__unclassified_o__Hyphomicrobiales	1164	0.0112307	24997.4	0.0722431
f__Thermincolaceae	1141.64	0.0110149	1863.17	0.00538461
f__Micrococcaceae	1122.13	0.0108267	5016.04	0.0144965
f__Psathyrellaceae	1110.61	0.0107156	142.763	0.00041259
f__Victivallaceae	1109.83	0.0107081	5127.75	0.0148193
f__unclassified_p__Nitrososphaerota	1101.25	0.0106253	13139.3	0.0379727
f__unclassified_p__Candidatus_Poribacteria	1088.01	0.0104975	5227.74	0.0151083
f__Geodermatophilaceae	1087.72	0.0104947	5366.69	0.0155098
f__unclassified_p__Candidatus_Rokuibacteriota	1087.05	0.0104883	8134.98	0.0235103
f__Desulfocapsaceae	1081.49	0.0104346	5550.46	0.016041
f__Desulfuromonadaceae	1081.12	0.010431	2471.09	0.00714151
f__Umbelopsidaceae	1079.96	0.0104199	601.154	0.00173735
f__Thermoanaerobacterales_Family_IV._Incertae_Sedis	1054.67	0.0101758	3281.64	0.00948402
f__Heliobacteriaceae	1040.26	0.0100368	2540.43	0.0073419
f__Chthoniobacteraceae	1039.18	0.0100264	4872.84	0.0140826
f__Aeromonadaceae	1028.17	0.00992014	99243.9	0.286817
f__Maliibacteriaceae	1021.77	0.00985836	3131.39	0.0090498
f__Caldicoprobacteraceae	1013.72	0.00978073	8450.44	0.0244219
f__Cellulomonadaceae	1004.16	0.00968848	3081.51	0.00890561
f__unclassified_c__Gammaproteobacteria	996.832	0.00961779	4924.9	0.0142331
f__Yeguiaceae	977.102	0.00942744	2558.71	0.00739474
f__Chromatiaceae	964.971	0.00931039	15383.9	0.0444599
f__unclassified_p__Candidatus_Methylomirabilota	938.334	0.00905339	15058.2	0.0435185
f__Sphaerotilaceae	925.703	0.00893152	9151.76	0.0264488
f__Characeae	925.504	0.0089296	940.025	0.00271669
f__Thermodesulfobacteriaceae	922.512	0.00890073	971.113	0.00280654
f__Sterolibacteriaceae	922.104	0.0088968	4623.8	0.0133629
f__Desulfarculaceae	916.327	0.00884105	2769.45	0.00800378
f__unclassified_p__Candidatus_Dormiibacterota	910.938	0.00878906	15583.3	0.0450362
f__Actinomycetaceae	886.87	0.00855684	4624.95	0.0133662
f__Kribbellaceae	880.521	0.00849558	2703.75	0.00781389
f__Arcobacteraceae	872.469	0.0084179	3480.51	0.0100587
f__Capillimicrobiaceae	863.536	0.00833171	16083.7	0.0464823
f__unclassified_p__Candidatus_Rifleibacteriota	857.367	0.00827219	3499.06	0.0101124
f__Stappiaceae	852.205	0.00822238	28912.7	0.0835584
f__Gracilariaceae	843.135	0.00813487	43.512	0.00012575
f__Sutterellaceae	842.973	0.00813331	3676.58	0.0106254
f__Nitrospiraceae	835.159	0.00805791	12384.6	0.0357918
f__Methanocaldococcaceae	827.56	0.0079846	44.3072	0.00012805
f__Chytriomycetaceae	827.1	0.00798016	1271.3	0.00367409
f__Rhodanobacteraceae	823.345	0.00794393	3870.5	0.0111858
f__unclassified_p__Nanoarchaeota	819.185	0.00790379	1862.95	0.00538397
f__Peptoclostridiaceae	809.646	0.00781176	4046.88	0.0116956
f__Aphanizomenonaceae	806.138	0.00777791	1355.52	0.00391749
f__Verrucomicrobiaceae	797.599	0.00769553	2904.37	0.00839369
f__Halanaerobiaceae	795.074	0.00767116	4998.86	0.0144468
f__Microcoleaceae	793.62	0.00765713	3565.89	0.0103055
f__Fibrobacteraceae	785.542	0.00757919	4360.12	0.0126008
f__unclassified_o__Crassvirales	776.941	0.00749621	39537.2	0.114263
f__Acidilutibacteraceae	767.474	0.00740487	3169.14	0.00915888
f__Acidithiobacillaceae	757.918	0.00731267	2205.59	0.0063742
f__Gracilibacteraceae	755.715	0.00729141	538.063	0.00155501
f__Sulfurovaceae	755.704	0.00729131	1147.39	0.00331598
f__Orbaceae	754.327	0.00727802	2433.03	0.0070315
f__unclassified_c__Candidatus_Peribacteria	753.67	0.00727168	2273.51	0.0065705
f__unclassified_p__Candidatus_Latescibacterota	752.844	0.00726371	4497.18	0.0129969
f__unclassified_c__Candidatus_Binatia	751.229	0.00724813	11714.6	0.0338555
f__Syntrophaceae	742.306	0.00716203	2985.37	0.00862779
f__Polyporaceae	740.035	0.00714013	245.232	0.00070873
f__Alicyclobacillaceae	730.594	0.00704903	3916.48	0.0113187
f__Pseudoalteromonadaceae	729.454	0.00703804	8423.37	0.0243437
f__Mucoraceae	709.982	0.00685017	11026.5	0.0318669
f__Prolixibacteraceae	705.335	0.00680533	14693.9	0.0424658
f__Dethiobacteraceae	703.576	0.00678835	2655.12	0.00767335
f__Legionellaceae	699.023	0.00674442	16144.1	0.0466567
f__Desulfitibacteraceae	691.692	0.0066737	2161.97	0.00624813
f__Nitrosomonadaceae	688.341	0.00664137	10143.7	0.0293156
f__Sulfurimonadaceae	687.888	0.00663699	4287.13	0.0123899
f__Halobacteroidaceae	685.598	0.0066149	3495.21	0.0101012
f__unclassified_p__Thermoproteota	680.522	0.00656592	12400.4	0.0358373
f__Candidatus_Vecturitrichaceae	680.413	0.00656487	2617.15	0.00756361
f__Hymenobacteraceae	667.574	0.006441	5203.08	0.015037
f__Chitinibacteraceae	666.508	0.00643071	2313.45	0.00668592
f__Crevaviridae	666.149	0.00642725	8401.95	0.0242818
f__Cytophagaceae	666.131	0.00642708	3122.56	0.00902425
f__Rickettsiaceae	659.215	0.00636034	24630.6	0.0711828
f__Candidatus_Competibacteraceae	658.149	0.00635006	3202.46	0.00925519
f__Phaeosphaeriaceae	652.078	0.00629148	24.7052	7.14e-05
f__Desulfonauticaceae	651.542	0.00628631	2821.07	0.00815296
f__unclassified_p__Candidatus_Nomurabacteria	646.171	0.00623449	3821.75	0.0110449
f__Thermoanaerobacterales_Family_III._Incertae_Sedis	633.582	0.00611303	1484.78	0.00429104
f__Caulobacteraceae	630.829	0.00608647	7920.03	0.0228891
f__Thermoleophilaceae	621.949	0.00600079	13618.2	0.039357
f__Fervidobacteriaceae	617.836	0.0059611	5308.12	0.0153406
f__unclassified_p__Candidatus_Woesearchaeota	614.718	0.00593102	4579.87	0.0132359
f__Cunninghamellaceae	608.598	0.00587198	656.184	0.00189639
f__Caldicellulosiruptoraceae	601.737	0.00580578	2410.63	0.00696678
f__Thermomonosporaceae	599.866	0.00578772	6864.6	0.0198388
f__Aurantimonadaceae	599.154	0.00578086	17698.1	0.0511477
f__Desulfonatronaceae	594.646	0.00573736	2693.22	0.00778346
f__Pectobacteriaceae	566.703	0.00546775	4927.49	0.0142405
f__Syntrophobacteraceae	564.294	0.00544452	2051.93	0.00593013
f__Desulfatibacillaceae	562.873	0.0054308	1124.43	0.00324964
f__Spiroplasmataceae	562.805	0.00543015	6053.17	0.0174938
f__Reyranellaceae	559.933	0.00540244	13989.2	0.0404291
f__Caldisericaceae	555.46	0.00535927	85.9892	0.00024851
f__Proteinivoraceae	550.865	0.00531495	9307.14	0.0268978
f__unclassified_p__Cyanobacteriota	536.109	0.00517257	2702.47	0.00781018
f__Methanococcaceae	527.136	0.005086	438.43	0.00126707
f__unclassified_p__Candidatus_Eiseniibacteriota	522.991	0.00504601	5286.83	0.015279
f__Aristaeellaceae	515.88	0.00497739	1978.47	0.00571781
f__Aminiphilaceae	512.567	0.00494543	2625.4	0.00758747
f__Marinilabiliaceae	509.197	0.00491291	11500	0.0332352
f__Scytonemataceae	508.182	0.00490312	838.256	0.00242258
f__Acidobacteriaceae	507.627	0.00489777	2838.85	0.00820433
f__Kosmotogaceae	502.808	0.00485128	1365.72	0.00394695
f__Inoviridae	499.823	0.00482248	1166.37	0.00337083
f__Devosiaceae	488.598	0.00471417	10820.1	0.0312704
f__Leptolyngbyaceae	487.773	0.00470621	2084.93	0.00602549
f__Caedimonadaceae	484.575	0.00467535	19263.6	0.0556723
f__unclassified_p__Candidatus_Zixiibacteriota	482.465	0.00465499	6199.26	0.017916
f__Alteromonadaceae	481.623	0.00464687	5817.6	0.016813
f__Azonexaceae	481.346	0.00464421	2606.82	0.00753378
f__Syntrophotaleaceae	477.171	0.00460392	1372.97	0.00396792
f__Bogoriellaceae	475.733	0.00459004	654.505	0.00189153
f__Francisellaceae	475.592	0.00458868	4486.85	0.0129671
f__unclassified_c__Candidatus_Bathyarchaeia	474.781	0.00458086	2323.98	0.00671635
f__Cyclobacteriaceae	474.124	0.00457452	4166.38	0.0120409
f__Piscirickettsiaceae	470.756	0.00454202	2658.31	0.00768258
f__unclassified_p__Candidatus_Kapaibacteriota	468.969	0.00452479	1325.21	0.00382988
f__unclassified_p__Candidatus_Aenigmatarchaeota	468.76	0.00452277	3508.24	0.0101389
f__Pirellulaceae	466.066	0.00449678	44644.6	0.129024
f__unclassified_c__Deltaproteobacteria	465.078	0.00448724	5021.96	0.0145136
f__Oceanospirillaceae	457.826	0.00441727	5055.57	0.0146107
f__Fulvivirgaceae	457.228	0.0044115	1439.7	0.00416077
f__Anaplasmataceae	452.759	0.00436839	14610.1	0.0422234
f__unclassified_p__Candidatus_Melainabacteria	452.739	0.00436819	4216.71	0.0121864
f__unclassified_p__Candidatus_Gottesmanbacteria	447.404	0.00431671	131.858	0.00038107
f__Thermosediminibacteraceae	445.796	0.0043012	1876.7	0.00542371
f__Pleomorphomonadaceae	444.111	0.00428494	3248.13	0.00938716
f__unclassified_c__Terriglobia	443.351	0.00427761	5774.69	0.016689
f__unclassified_p__Candidatus_Nealsoniibacteriota	443.289	0.00427701	3846.18	0.0111156
f__Promicromonosporaceae	443.259	0.00427673	4438.38	0.012827
f__Brucellaceae	442.8	0.0042723	6239.24	0.0180315
f__unclassified_o__Methanophagales	436.957	0.00421592	479.407	0.0013855
f__unclassified_o__Chroococcidiopsidales	436.904	0.00421541	167.482	0.00048403
f__Methanomicrobiaceae	432.32	0.00417119	2812.04	0.00812684
f__Methanospirillaceae	431.984	0.00416794	714.5	0.00206492
f__Hydrogenothermaceae	430.414	0.00415279	2052.43	0.00593158
f__Spirosomataceae	429.16	0.00414069	3022.91	0.00873627
f__Candidatus_Cryosericaceae	428.31	0.00413249	1080.91	0.00312385
f__Nitrosopumilaceae	424.618	0.00409687	5012.44	0.0144861
f__Aquaspirillaceae	422.857	0.00407988	1041.61	0.00301029
f__Holophagaceae	419.412	0.00404664	1241.13	0.0035869
f__Chlorobiaceae	414.341	0.00399771	1938.09	0.00560113
f__Shewanellaceae	412.384	0.00397883	28500.3	0.0823664
f__Boseaceae	410.634	0.00396195	4984.89	0.0144064
f__unclassified_p__Candidatus_Sumerlaeota	410.497	0.00396063	2521.11	0.00728607
f__Legeriomycetaceae	410.072	0.00395652	3559.86	0.0102881
f__Herelleviridae	396.554	0.0038261	4730.06	0.01367
f__Gigasporaceae	394.312	0.00380446	11940.2	0.0345074
f__unclassified_o__Spirochaetales	393.41	0.00379576	837.745	0.0024211
f__Oxytrichidae	389.468	0.00375773	385.879	0.0011152
f__Candidatus_Deferrimicrobiaceae	384.687	0.0037116	23744.5	0.068622
f__Planctomycetaceae	383.732	0.00370238	20445.8	0.0590888
f__Nakamurellaceae	381.167	0.00367764	5623.93	0.0162533
f__Dermabacteraceae	377.256	0.0036399	511.269	0.00147758
f__Longimicrobiaceae	374.939	0.00361755	2059.31	0.00595146
f__Archangiaceae	369.803	0.00356799	1892.39	0.00546905
f__Dehalococcoidaceae	368.499	0.00355541	1087.44	0.00314271
f__Ectothiorhodospiraceae	365.683	0.00352824	4666.12	0.0134852
f__Gemellaceae	362.572	0.00349823	1997.36	0.0057724
f__Rhodovibrionaceae	362.501	0.00349754	12200.9	0.0352609
f__Kineosporiaceae	359.486	0.00346845	2184.49	0.00631322
f__Lichtheimiaceae	357.447	0.00344878	3603.18	0.0104133
f__Saprospiraceae	352.463	0.00340069	1426.12	0.00412152
f__Candidatus_Korobacteraceae	352.307	0.00339918	5294.72	0.0153019
f__unclassified_p__Candidatus_Kaiserbacteria	352.067	0.00339687	1404.51	0.00405907
f__Candidatus_Brocadiaceae	348.354	0.00336105	665.29	0.0019227
f__Acetomicrobiaceae	345.402	0.00333257	1375.62	0.00397558
f__Kaistiaceae	343.322	0.0033125	24894.4	0.0719454
f__unclassified_p__Candidatus_Parcubacteria	343.029	0.00330967	2617.01	0.00756322
f__Pseudobdellovibrionaceae	342.494	0.0033045	8956.01	0.0258831
f__Aestuariivirgaceae	342.454	0.00330412	2673.47	0.00772638
f__Erythrobacteraceae	339.919	0.00327966	3434.17	0.00992484
f__Desulfocucumaceae	339.266	0.00327336	1005.37	0.00290553
f__Myxococcaceae	339.232	0.00327304	3424.32	0.00989637
f__Opitutaceae	336.291	0.00324466	1515.11	0.00437869
f__Jiangellaceae	333.581	0.00321851	1666.72	0.00481686
f__Mortierellaceae	333.186	0.0032147	3298.37	0.00953235
f__Gallionellaceae	331.863	0.00320194	2021.35	0.00584174
f__Chlorokybaceae	326.44	0.00314961	172.473	0.00049845
f__Caldilineaceae	326.4	0.00314923	6506.31	0.0188034
f__unclassified_p__Candidatus_Bathyarchaeota	314.826	0.00303755	7130.23	0.0206065
f__unclassified_p__Candidatus_Moraniibacteriota	311.685	0.00300725	3011.38	0.00870294
f__Didymellaceae	308.674	0.0029782	103.331	0.00029863
f__Marinifilaceae	304.323	0.00293622	5062.09	0.0146295
f__Candidatus_Fibrimonadaceae	302.333	0.00291702	441.524	0.00127601
f__unclassified_o__Myxococcales	296.904	0.00286463	430.518	0.00124421
f__Methanomethylophilaceae	295.897	0.00285493	1093.53	0.00316033
f__Haliscomenobacteraceae	295.038	0.00284663	1567.78	0.00453091
f__Thiotrichaceae	294.884	0.00284515	2990.44	0.00864243
f__Parachlamydiaceae	292.949	0.00282647	7222.14	0.0208721
f__unclassified_p__Candidatus_Delongiibacteriota	291.222	0.00280981	1522.89	0.00440119
f__Thermotogaceae	291.05	0.00280815	624.264	0.00180414
f__Synechococcaceae	289.823	0.00279632	1649.09	0.00476591
f__unclassified_p__Candidatus_Bipolaricaulota	289.44	0.00279262	1595.53	0.00461113
f__Nyctotheridae	288.329	0.00278191	0	0
f__unclassified_c__Thermoplasmata	286.69	0.00276609	4606.46	0.0133128
f__unclassified_p__Candidatus_Micrarchaeota	286.237	0.00276172	970.906	0.00280594
f__Gemmataceae	283.191	0.00273233	5568.52	0.0160931
f__Flectobacillaceae	279.35	0.00269527	995.086	0.00287582
f__Neocallimastigaceae	272.411	0.00262832	4310.95	0.0124587
f__Frankiaceae	269.194	0.00259728	6351.61	0.0183563
f__unclassified_c__Filasterea	269.147	0.00259682	6830.63	0.0197407
f__Leptospiraceae	266.077	0.00256721	1996.86	0.00577097
f__Smithellaceae	264.579	0.00255276	1262.79	0.00364948
f__Colwelliaceae	261.963	0.00252751	4522.78	0.0130709
f__Ignatzschineriaceae	258.979	0.00249872	80.406	0.00023237
f__Leptosphaeriaceae	258.5	0.0024941	7.6683	2.216e-05
f__Oscillatoriaceae	258.39	0.00249304	1126.94	0.00325689
f__Candidatus_Midichloriaceae	256.442	0.00247425	5961.19	0.0172279
f__Gordoniaceae	254.963	0.00245997	21661.8	0.062603
f__unclassified_p__Candidatus_Margulisiibacteriota	253.061	0.00244163	1958.48	0.00566006
f__Micropepsaceae	252.697	0.00243811	5480.5	0.0158388
f__Deinococcaceae	252.232	0.00243363	1011.04	0.00292194
f__Usitatibacteraceae	250.079	0.00241285	1778.61	0.00514023
f__Patulibacteraceae	249.937	0.00241148	3869.27	0.0111823
f__Cohaesibacteraceae	246.804	0.00238125	2835.15	0.00819364
f__unclassified_c__Alphaproteobacteria	245.187	0.00236566	14007.9	0.0404832
f__Coxiellaceae	244.323	0.00235732	2227.3	0.00643694
f__unclassified_p__Candidatus_Walliibacteriota	242.876	0.00234336	488.888	0.0014129
f__Isosphaeraceae	240.709	0.00232245	4383.08	0.0126672
f__Chlamydiaceae	238.772	0.00230375	37788.4	0.109209
f__Hyphomonadaceae	235.59	0.00227306	5428.15	0.0156875
f__Rhabditidae	234.698	0.00226445	0	0
f__Calotrichaceae	234.096	0.00225864	429.533	0.00124136
f__Desulfoplanaceae	232.931	0.00224741	948.493	0.00274116
f__Sarcocystidae	230.661	0.0022255	1720.41	0.00497202
f__unclassified_p__candidate_division_WOR-3	230.345	0.00222245	2390.27	0.00690794
f__Desulfolunaceae	227.96	0.00219944	854.022	0.00246814
f__Desulfonatronovibrionaceae	226.218	0.00218263	1359	0.00392753
f__Flammeovirgaceae	225.875	0.00217932	1673.31	0.00483589
f__Roseiflexaceae	225.773	0.00217834	902.879	0.00260934
f__Nectriaceae	219.638	0.00211914	374.812	0.00108322
f__Actinopolymorphaceae	219.397	0.00211682	696.535	0.002013
f__unclassified_c__Coriobacteriia	218.988	0.00211288	811.956	0.00234657
f__Elusimicrobiaceae	218.784	0.0021109	1503.26	0.00434444
f__unclassified_p__Candidatus_Auribacterota	218.306	0.0021063	906.11	0.00261868
f__unclassified_p__Candidatus_Falkowbacteria	218.268	0.00210593	1279.58	0.003698
f__Candidatus_Cloacimonadaceae	216.803	0.0020918	1989.69	0.00575024
f__Metamycoplasmataceae	216.186	0.00208584	4447.13	0.0128523
f__Candidatus_Scalinduaceae	215.647	0.00208064	2688.97	0.00777118
f__Anaeromyxobacteraceae	215.237	0.00207668	1982.89	0.00573061
f__Lewinellaceae	214.372	0.00206834	877.312	0.00253545
f__Desulfobacteriaceae	213.854	0.00206334	1595.41	0.00461076
f__Jatrophihabitantaceae	212.663	0.00205185	1247.23	0.00360453
f__Hujiaoplasmataceae	212.508	0.00205036	1123.94	0.00324822
f__Salpingoecidae	212.027	0.00204572	8489.59	0.0245351
f__Methylophilaceae	211.932	0.0020448	714.071	0.00206368
f__Phycomycetaceae	211.234	0.00203806	319.442	0.0009232
f__Baculoviridae	207.815	0.00200508	291.558	0.00084261
f__Phenuiviridae	207.167	0.00199882	25.2002	7.283e-05
f__Shumkoniaceae	205.205	0.00197989	1303.5	0.00376714
f__Actinopolysporaceae	201.897	0.00194797	277.387	0.00080166
f__Haloplasmataceae	200.363	0.00193317	1248.63	0.00360857
f__Methanocalculaceae	199.491	0.00192476	33.2535	9.61e-05
f__Thalassospiraceae	199.394	0.00192382	4578.13	0.0132309
f__Syntrophorhabdaceae	198.037	0.00191073	2868.26	0.00828934
f__Desulfuribacillaceae	196.637	0.00189723	1425.65	0.00412017
f__Tolypothrichaceae	195.865	0.00188977	158.094	0.00045689
f__unclassified_p__Candidatus_Tectimicrobiota	195.235	0.0018837	2520.36	0.0072839
f__unclassified_o__Rhizophydiales	193.669	0.00186859	498.774	0.00144147
f__Lacipirellulaceae	193.1	0.0018631	53589.4	0.154874
f__Aquificaceae	192.76	0.00185982	652.954	0.00188705
f__Ancylistaceae	191.356	0.00184628	646.795	0.00186925
f__Glycomycetaceae	191.013	0.00184296	825.775	0.00238651
f__unclassified_c__Blastocatellia	189.599	0.00182932	376.286	0.00108747
f__Hymenochaetaceae	188.876	0.00182234	105.304	0.00030433
f__unclassified_o__Methanosarcinales	187.724	0.00181123	895.82	0.00258894
f__Cerasicoccaceae	186.35	0.00179798	515.292	0.0014892
f__Candidatus_Binataceae	185.293	0.00178777	4197.37	0.0121305
f__Endozoicomonadaceae	184.982	0.00178477	5810.55	0.0167926
f__Anaeroplasmataceae	183.004	0.00176568	2696.27	0.00779229
f__Acidimicrobiaceae	182.033	0.00175632	4577.16	0.0132281
f__unclassified_c__Candidatus_Krumholzibacteriia	181.692	0.00175303	1520.2	0.00439342
f__Desulfococcaceae	180.43	0.00174086	1466.4	0.00423794
f__Saccharofermentanaceae	179.45	0.0017314	164.373	0.00047504
f__Tindalliaceae	179.153	0.00172853	2066.95	0.00597352
f__Bulleribasidiaceae	178.585	0.00172306	0	0
f__Hapalosiphonaceae	178.583	0.00172303	511.674	0.00147875
f__Ignavibacteriaceae	178.244	0.00171976	545.751	0.00157723
f__unclassified_p__Candidatus_Fermentibacteria	178.14	0.00171876	365.435	0.00105612
f__Marivirgaceae	177.74	0.0017149	255.589	0.00073866
f__Beijerinckiaceae	177.608	0.00171363	3906.24	0.0112891
f__Holosporaceae	176.267	0.00170068	8734.02	0.0252415
f__Geminicoccaceae	175.445	0.00169275	3116.16	0.00900576
f__Cardiobacteriaceae	174.779	0.00168633	37.1627	0.0001074
f__Coprothermobacteraceae	173.619	0.00167514	718.259	0.00207578
f__Agaricaceae	173.339	0.00167244	1180.94	0.00341293
f__Bacteriovoracaceae	173.047	0.00166962	848.045	0.00245087
f__Oscillochloridaceae	171.167	0.00165149	638.99	0.00184669
f__Methanotrichaceae	170.717	0.00164714	1001.63	0.00289472
f__unclassified_p__Candidatus_Peregrinibacteria	170.244	0.00164258	1676.46	0.004845
f__Candidatus_Methylomirabilaceae	169.656	0.0016369	3010.48	0.00870035
f__Marinobacteraceae	169.442	0.00163484	3501.22	0.0101186
f__Emcibacteraceae	169.329	0.00163375	2365.52	0.0068364
f__Candidatus_Moduliflexaceae	168.956	0.00163015	602.255	0.00174053
f__Sphaerobacteraceae	168.824	0.00162887	1307.4	0.00377841
f__Corynebacteriaceae	168.817	0.00162881	1114.21	0.00322009
f__Nocardiopsaceae	167.861	0.00161958	1977.93	0.00571626
f__Sulfurospirillaceae	166.616	0.00160757	522.601	0.00151033
f__Sedimentisphaeraceae	166.572	0.00160715	318.454	0.00092034
f__Leadbetterellaceae	166.52	0.00160665	1364.38	0.00394308
f__Adintoviridae	165.594	0.00159771	3490.63	0.010088
f__Bartonellaceae	165.292	0.00159479	3549.41	0.0102579
f__Paraconexibacteraceae	164.899	0.001591	2994.2	0.00865332
f__Halobacteriovoraceae	164.591	0.00158803	670.292	0.00193716
f__Pleioneaceae	164.388	0.00158607	800.051	0.00231216
f__Kickxellaceae	160.578	0.00154932	2869.83	0.00829387
f__unclassified_o__Halanaerobiales	160.397	0.00154757	332.011	0.00095952
f__Thiobacillaceae	160.27	0.00154634	628.814	0.00181728
f__Thermodesulfovibrionaceae	159.978	0.00154353	2111.77	0.00610307
f__Vulcanimicrobiaceae	158.954	0.00153364	1659.7	0.00479658
f__Natranaerofabaceae	158.761	0.00153179	307.043	0.00088736
f__Geoalkalibacteraceae	156.857	0.00151342	517.822	0.00149652
f__Treboniaceae	154.817	0.00149373	2586.5	0.00747503
f__Pseudanabaenaceae	153.612	0.0014821	881.326	0.00254705
f__unclassified_p__Candidatus_Aerophobetes	153.541	0.00148142	3341.74	0.0096577
f__Thermovirgaceae	152.84	0.00147466	1526.81	0.0044125
f__Lyophyllaceae	152.138	0.00146789	353.069	0.00102038
f__Labilitrichaceae	150.444	0.00145154	1160.02	0.00335249
f__Euplotidae	149.95	0.00144678	591.644	0.00170986
f__Dictyoglomaceae	148.495	0.00143273	353.198	0.00102075
f__Clostridiales_Family_XVII._Incertae_Sedis	148.387	0.00143169	492.037	0.001422
f__Candidatus_Methanofastidiosaceae	147.889	0.00142689	520.815	0.00150517
f__Microbulbiferaceae	147.849	0.0014265	43582	0.125953
f__Moritellaceae	143.687	0.00138635	1179	0.00340732
f__unclassified_c__Candidatus_Saccharimonadia	143.662	0.0013861	2827.79	0.00817237
f__Desulfomonilaceae	140.376	0.0013544	976.543	0.00282223
f__Miltoncostaeaceae	140.019	0.00135095	2750.63	0.00794937
f__unclassified_p__Candidatus_Woesebacteria	139.81	0.00134893	587.994	0.00169932
f__Desulfatiglandaceae	139.321	0.00134422	933.308	0.00269728
f__Candidatus_Oleimmundimicrobiaceae	138.637	0.00133762	291.495	0.00084243
f__Pythiaceae	137.208	0.00132384	1326.92	0.00383484
f__Microcystaceae	136.959	0.00132143	845.946	0.0024448
f__Poaceae	135.962	0.00131181	34.4883	9.967e-05
f__Polyangiaceae	134.338	0.00129614	2924.66	0.00845234
f__Bacillales_Family_X._Incertae_Sedis	134.278	0.00129556	220.868	0.00063831
f__Thermaceae	134.247	0.00129526	975.669	0.0028197
f__Aminithiophilaceae	133.893	0.00129185	1660.12	0.00479777
f__Massarinaceae	133.73	0.00129028	20.6472	5.967e-05
f__Ornithinimicrobiaceae	133.405	0.00128714	847.419	0.00244906
f__Desulforegulaceae	132.208	0.00127559	212.246	0.00061339
f__Candidatus_Izemoplasmataceae	130.507	0.00125918	1203.38	0.0034778
f__Ambisporaceae	129.357	0.00124808	3122.07	0.00902285
f__Candidatus_Entotheonellaceae	128.989	0.00124453	3495.94	0.0101033
f__unclassified_p__Candidatus_Diapherotrites	128.33	0.00123817	1374.34	0.00397186
f__unclassified_o__Nostocales	127.913	0.00123415	286.768	0.00082876
f__Methanoregulaceae	127.117	0.00122647	1798.62	0.00519805
f__Cellvibrionaceae	127.031	0.00122564	2202.57	0.00636547
f__Candidatus_Saccharimonadaceae	125.649	0.00121231	1721.87	0.00497624
f__unclassified_o__Limisphaerales	125.533	0.00121119	1190.22	0.00343976
f__Koleobacteraceae	124.729	0.00120343	649.053	0.00187578
f__Sulfuricellaceae	124.686	0.00120302	870.392	0.00251545
f__Didymosphaeriaceae	124.173	0.00119807	62.9684	0.00018198
f__Blepharismidae	123.99	0.0011963	313.622	0.00090637
f__Piptocephalidaceae	123.026	0.001187	1164	0.00336399
f__Thermosynergistaceae	123.001	0.00118676	618.722	0.00178812
f__Sphingosinicellaceae	122.585	0.00118275	1413.04	0.00408372
f__Candidatus_Babeliaceae	122.383	0.00118079	0	0
f__Symbiodiniaceae	121.461	0.0011719	1251.63	0.00361723
f__Thalassobaculaceae	121.045	0.00116788	6429.15	0.0185804
f__Hahellaceae	120.22	0.00115993	308.2	0.00089071
f__Dongiaceae	120.018	0.00115798	5604.46	0.016197
f__Parvibaculaceae	119.676	0.00115468	11605.8	0.0335411
f__Acidiferrobacteraceae	119.495	0.00115293	972.644	0.00281096
f__Dimargaritaceae	117.029	0.00112914	579.358	0.00167436
f__Simkaniaceae	116.768	0.00112662	5297.2	0.015309
f__Thermospiraceae	116.44	0.00112345	338.273	0.00097762
f__Rectinemataceae	116.031	0.00111951	781.27	0.00225789
f__Sneathiellaceae	115.412	0.00111353	4842.66	0.0139954
f__unclassified_c__Thermoprotei	114.276	0.00110258	357.623	0.00103354
f__Calderihabitantaceae	114.22	0.00110204	336.123	0.0009714
f__Candidatus_Flexifilaceae	114.025	0.00110015	773.14	0.00223439
f__unclassified_p__Candidatus_Krumholzibacteriota	113.454	0.00109465	93.0275	0.00026885
f__Balneolaceae	112.603	0.00108644	1331.26	0.00384738
f__Gemmatimonadaceae	112.603	0.00108643	1065.2	0.00307845
f__Lentimicrobiaceae	112.594	0.00108635	3668.27	0.0106014
f__Peltigeraceae	112.375	0.00108424	0	0
f__Nitratiruptoraceae	111.849	0.00107916	176.328	0.00050959
f__unclassified_p__Candidatus_Lokiarchaeota	111.378	0.00107462	789.847	0.00228267
f__Thiovibrionaceae	111.246	0.00107335	217.74	0.00062927
f__Perkinsidae	110.596	0.00106707	324.352	0.00093738
f__unclassified_p__candidate_division_WWE3	110.49	0.00106604	679.744	0.00196447
f__Steigviridae	110.46	0.00106576	22238.3	0.064269
f__unclassified_p__Candidatus_Gracilibacteria	109.908	0.00106043	47217.6	0.13646
f__Oligosphaeraceae	109.887	0.00106023	424.88	0.00122791
f__Candidatus_Hydrogenedentaceae	109.265	0.00105422	223.576	0.00064614
f__Hoyosellaceae	108.07	0.0010427	345.076	0.00099728
f__Diademaceae	107.779	0.0010399	0	0
f__unclassified_p__Candidatus_Goldiibacteriota	106.955	0.00103194	207.042	0.00059836
f__unclassified_o__Oxymonadida	106.479	0.00102735	346.684	0.00100192
f__unclassified_p__Candidatus_Muiribacteriota	106.095	0.00102365	153.428	0.00044341
f__Symbiobacteriaceae	105.67	0.00101954	618.86	0.00178852
f__Halteriidae	105.15	0.00101452	70.963	0.00020508
f__Actinospicaceae	104.514	0.00100839	562.101	0.00162448
f__unclassified_o__Thermoplasmatales	104.268	0.00100602	680.576	0.00196688
f__Steroidobacteraceae	103.946	0.00100291	927.241	0.00267975
f__Rivulariaceae	102.473	0.0009887	1318.12	0.0038094
f__Terasakiellaceae	102.137	0.00098545	2975.89	0.0086004
f__Porticoccaceae	99.808	0.00096298	196.02	0.0005665
f__Chrysiogenaceae	99.6908	0.00096185	785.926	0.00227134
f__Aphanothecaceae	99.1897	0.00095702	520.561	0.00150443
f__Kiloniellaceae	99.0544	0.00095571	5947.45	0.0171883
f__unclassified_p__candidate_division_FCPU426	99.0208	0.00095539	273.6	0.00079071
f__Kribbibacteriaceae	98.7114	0.0009524	52.6027	0.00015202
f__Stentoridae	98.2998	0.00094843	279.478	0.0008077
f__Ancalomicrobiaceae	97.642	0.00094209	857.972	0.00247956
f__Nosematidae	97.3841	0.0009396	49715.7	0.143679
f__Candidatus_Chromulinivoraceae	96.8806	0.00093474	23.7454	6.862e-05
f__Mesostigmataceae	96.2726	0.00092887	24.1751	6.987e-05
f__unclassified_p__Candidatus_Sungiibacteriota	96.1942	0.00092812	445.934	0.00128876
f__Pontiellaceae	95.5683	0.00092208	626.261	0.00180991
f__Oculatellaceae	95.4707	0.00092114	1065.04	0.00307798
f__Deferrisomataceae	94.5803	0.00091255	115.66	0.00033426
f__unclassified_p__Candidatus_Firestoneibacteriota	94.3103	0.00090994	60.332	0.00017436
f__Amoebophilaceae	94.2126	0.000909	3444.01	0.00995328
f__Candidatus_Promineifilaceae	93.9694	0.00090665	2589.24	0.00748295
f__Atribacteraceae	93.4534	0.00090167	760.236	0.0021971
f__Parvoviridae	93.0808	0.00089808	9093.09	0.0262792
f__unclassified_o__Candidatus_Peribacterales	92.9639	0.00089695	1184.07	0.00342198
f__Clostridiales_Family_XVI._Incertae_Sedis	92.9035	0.00089637	288.557	0.00083393
f__Halieaceae	92.685	0.00089426	2717.08	0.00785241
f__Candidatus_Methanoperedenaceae	92.6269	0.0008937	360.692	0.00104241
f__Roseiarcaceae	92.4011	0.00089152	4024.82	0.0116318
f__Candidatus_Villigracilaceae	92.1754	0.00088934	908.057	0.0026243
f__Parameciidae	91.9099	0.00088678	624.74	0.00180551
f__unclassified_p__Candidatus_Uhrbacteria	90.5302	0.00087347	822.85	0.00237805
f__Methylocystaceae	90.3695	0.00087192	5012.06	0.0144849
f__unclassified_c__Methanomicrobia	90.2345	0.00087062	269.144	0.00077783
f__Nevskiaceae	90.0781	0.00086911	837.535	0.00242049
f__Nitrospinaceae	89.6353	0.00086483	1244.61	0.00359694
f__Plectosphaerellaceae	89.5055	0.00086358	36.8788	0.00010658
f__Vitrellaceae	88.4707	0.0008536	273.28	0.00078979
f__Prochlorococcaceae	87.6536	0.00084571	359.43	0.00103876
f__Psychromonadaceae	87.1346	0.00084071	356.466	0.00103019
f__Saccharospirillaceae	86.778	0.00083727	397.825	0.00114972
f__Tenuifilaceae	85.5664	0.00082558	2837.11	0.00819929
f__Orobanchaceae	84.6323	0.00081656	0	0
f__Maricaulaceae	84.2287	0.00081267	2669.45	0.00771477
f__Trichomeriaceae	84.0003	0.00081047	74.283	0.00021468
f__Roseivirgaceae	83.0345	0.00080115	380.532	0.00109974
f__Chelatococcaceae	82.999	0.0008008	3196.98	0.00923933
f__Trichocoleusaceae	82.7048	0.00079797	123.466	0.00035682
f__unclassified_o__Bifidobacteriales	81.5982	0.00078729	184.885	0.00053432
f__Ackermannviridae	80.3398	0.00077515	2931.86	0.00847315
f__Entomoplasmataceae	79.9567	0.00077145	2662.22	0.00769388
f__unclassified_o__Rickettsiales	79.1263	0.00076344	2830	0.00817876
f__Hippeaceae	79.0447	0.00076265	126.744	0.00036629
f__Demequinaceae	79.0302	0.00076251	1453.78	0.00420144
f__Dermacoccaceae	78.5883	0.00075825	549.374	0.0015877
f__Kordiimonadaceae	78.5456	0.00075784	2070.34	0.00598334
f__Anaeramoebidae	78.0827	0.00075337	751.782	0.00217267
f__unclassified_p__Candidatus_Thorarchaeota	77.7594	0.00075025	1874.71	0.00541796
f__Desulfohalobiaceae	77.6616	0.00074931	1398.75	0.00404241
f__Fortieaceae	77.044	0.00074335	21.0312	6.078e-05
f__Candidatus_Aquicultoraceae	76.3974	0.00073711	239.883	0.00069327
f__unclassified_p__Candidatus_Thermoplasmatota	76.23	0.00073549	1140.21	0.00329522
f__Coleofasciculaceae	76.1174	0.00073441	313.907	0.0009072
f__Solibacteraceae	76.1029	0.00073427	918.23	0.0026537
f__unclassified_o__Thiotrichales	75.8751	0.00073207	34.6485	0.00010013
f__Gallaecimonadaceae	75.7727	0.00073108	48.5342	0.00014026
f__Gigartinaceae	75.3893	0.00072738	2573.37	0.0074371
f__Methylacidiphilaceae	75.2799	0.00072633	211.355	0.00061082
f__unclassified_p__Candidatus_Colwelliibacteriota	74.7874	0.00072158	88.509	0.00025579
f__Candidatus_Fermentibacteraceae	74.6265	0.00072002	181.683	0.00052507
f__Desulfurococcaceae	74.5496	0.00071928	883.103	0.00255219
f__Thermomicrobiaceae	74.3445	0.0007173	779.993	0.0022542
f__Fastidiosibacteraceae	73.9105	0.00071312	11566.9	0.0334284
f__unclassified_c__Aphelidea	73.5245	0.00070939	454.678	0.00131403
f__Salinisphaeraceae	73.4352	0.00070853	414.143	0.00119688
f__unclassified_c__Candidatus_Abyssobacteria	73.3834	0.00070803	166.504	0.0004812
f__Chrysochromulinaceae	72.9511	0.00070386	198.01	0.00057225
f__Saccharomycetaceae	72.7878	0.00070228	1368.85	0.00395602
f__Pseudobacteriovoracaceae	72.5128	0.00069963	93.4401	0.00027004
f__unclassified_p__Candidatus_Lithacetigenota	71.9628	0.00069432	130.841	0.00037813
f__Candidatus_Caldarchaeaceae	71.6657	0.00069146	2.6691	7.71e-06
f__Crocinitomicaceae	71.4324	0.00068921	2145.78	0.00620134
f__Vaejovidae	70.846	0.00068355	0	0
f__Thermodesulforhabdaceae	70.6474	0.00068163	34.0226	9.833e-05
f__Ustilaginaceae	70.6438	0.0006816	179.577	0.00051898
f__Thermodesulfatatoraceae	69.7295	0.00067278	93.6767	0.00027073
f__Novispirillaceae	69.6214	0.00067173	3525.06	0.0101875
f__unclassified_c__Actinomycetes	69.3167	0.00066879	937.017	0.002708
f__Temperatibacteraceae	69.3138	0.00066876	16.1738	4.674e-05
f__Aspergillaceae	69.18	0.00066747	862.621	0.00249299
f__unclassified_p__Candidatus_Absconditabacteria	68.9895	0.00066564	3581.35	0.0103502
f__Nodosilineaceae	68.8976	0.00066475	714.782	0.00206574
f__Chloroflexaceae	68.1093	0.00065714	280.894	0.00081179
f__Williamwhitmaniaceae	67.7768	0.00065393	2179.12	0.00629769
f__Streblomastigidae	67.6653	0.00065286	884.51	0.00255625
f__Spirulinaceae	67.4248	0.00065054	277.706	0.00080258
f__Desulfurobacteriaceae	67.1365	0.00064776	246.626	0.00071276
f__Chroococcaceae	66.8977	0.00064545	220.822	0.00063818
f__unclassified_p__candidate_division_CSSED10-310	66.7402	0.00064393	546.304	0.00157883
f__Idiomarinaceae	66.5561	0.00064216	493.179	0.0014253
f__Paraglomeraceae	66.4997	0.00064161	376.772	0.00108888
f__unclassified_c__Opitutia	66.2471	0.00063918	47.9506	0.00013858
f__Intestinicryptomonaceae	66.204	0.00063876	110.015	0.00031794
f__Periconiaceae	66.1744	0.00063847	29.5586	8.543e-05
f__Candidatus_Magnetomoraceae	66.1042	0.0006378	216.969	0.00062705
f__unclassified_c__Candidatus_Hadarchaeia	66.0116	0.0006369	61.249	0.00017701
f__Kofleriaceae	64.356	0.00062093	512.308	0.00148058
f__Chlorellaceae	64.2825	0.00062022	15.3841	4.446e-05
f__Limnochordaceae	63.5197	0.00061286	461.709	0.00133435
f__unclassified_o__Methylococcales	63.1475	0.00060927	110.532	0.00031944
f__Nannocystaceae	62.9545	0.00060741	894.5	0.00258512
f__Pyrenomonadaceae	62.869	0.00060658	219.897	0.00063551
f__unclassified_p__Candidatus_Daviesbacteria	62.6746	0.00060471	445.498	0.0012875
f__Tetrahymenidae	62.5913	0.0006039	1381.6	0.00399286
f__Tubulinosematidae	62.5631	0.00060363	25128.1	0.0726209
f__Anaerohalosphaeraceae	62.3436	0.00060151	194.878	0.0005632
f__unclassified_c__Candidatus_Nanoarchaeia	62.322	0.00060131	612.95	0.00177144
f__Gloeotrichiaceae	62.2421	0.00060053	0	0
f__Pelagicoccaceae	62.1362	0.00059951	187.864	0.00054293
f__unclassified_c__Thermococci	62.0449	0.00059863	373.647	0.00107985
f__Thermococcaceae	61.6922	0.00059523	219.987	0.00063577
f__unclassified_o__Eutreptiales	60.4286	0.00058304	134.713	0.00038932
f__Brevibacteriaceae	60.0848	0.00057972	427.082	0.00123428
f__Pumilibacteraceae	59.6892	0.0005759	2683.66	0.00775582
f__unclassified_o__Candidatus_Absconditabacterales	59.3188	0.00057233	270.852	0.00078277
f__unclassified_p__Candidatus_Roizmanbacteria	58.5022	0.00056445	308.974	0.00089294
f__Dictyosteliaceae	58.4059	0.00056352	972.257	0.00280984
f__Geminocystaceae	58.2919	0.00056242	350.219	0.00101214
f__Vicingaceae	58.2351	0.00056187	410.408	0.00118609
f__Ceratobasidiaceae	58.23	0.00056182	1680.39	0.00485637
f__unclassified_o__Alteromonadales	58.1976	0.00056151	96.6463	0.00027931
f__Dermatophilaceae	58.1416	0.00056097	347.553	0.00100444
f__Candidatus_Poriferisodalaceae	57.998	0.00055959	357.254	0.00103247
f__Arenicellaceae	57.587	0.00055562	54.5527	0.00015766
f__Saturniidae	57.4512	0.00055431	63.7662	0.00018429
f__unclassified_c__Mollicutes	57.3044	0.00055289	235.371	0.00068023
f__unclassified_c__Candidatus_Methanofastidiosia	57.2306	0.00055218	234.761	0.00067846
f__Corynesporascaceae	57.201	0.0005519	10.2235	2.955e-05
f__Mariprofundaceae	56.9127	0.00054911	312.722	0.00090377
f__Ktedonosporobacteraceae	56.6998	0.00054706	252.373	0.00072936
f__Halothiobacillaceae	56.6894	0.00054696	111.092	0.00032106
f__Lingulodiniaceae	56.6549	0.00054663	279.538	0.00080787
f__unclassified_c__Candidatus_Sumerlaeia	56.4391	0.00054455	378.812	0.00109478
f__unclassified_o__Desulfobacterales	56.2657	0.00054287	1290.13	0.00372851
f__Herpotrichiellaceae	55.903	0.00053937	230.274	0.0006655
f__unclassified_p__Candidatus_Portnoyibacteriota	55.7401	0.0005378	58.0363	0.00016773
f__unclassified_o__Vampirovibrionales	55.4186	0.0005347	551.017	0.00159245
f__Magnetococcaceae	54.9637	0.00053031	5870.69	0.0169664
f__Hyellaceae	54.8301	0.00052902	1485.63	0.00429349
f__unclassified_o__Candidatus_Sumerlaeales	54.8217	0.00052894	105.248	0.00030417
f__Dictyobacteraceae	54.519	0.00052602	402.687	0.00116377
f__Calditrichaceae	54.1827	0.00052277	274.844	0.00079431
f__Teratosphaeriaceae	54.1571	0.00052253	359.327	0.00103846
f__unclassified_c__Candidatus_Thermofonsia	54.0288	0.00052129	186.593	0.00053926
f__Drosophilidae	53.9604	0.00052063	1599.18	0.00462165
f__Natranaerobiaceae	53.6933	0.00051805	339.512	0.0009812
f__Acaulosporaceae	53.5992	0.00051714	441.461	0.00127583
f__Mimiviridae	53.2274	0.00051356	5401.26	0.0156098
f__Halothermotrichaceae	53.1816	0.00051312	498.402	0.00144039
f__unclassified_p__Candidatus_Magasanikiibacteriota	52.5341	0.00050687	262.958	0.00075996
f__Rubricoccaceae	52.5283	0.00050681	3592.46	0.0103823
f__Geosiphonaceae	52.3334	0.00050493	157.73	0.00045584
f__unclassified_o__Micrococcales	52.0663	0.00050235	254.132	0.00073445
f__unclassified_p__Candidatus_Shapirobacteria	52.0588	0.00050228	899.723	0.00260022
f__Candidatus_Rhabdochlamydiaceae	51.9964	0.00050168	116.351	0.00033626
f__Cryptosporangiaceae	51.9733	0.00050146	335.164	0.00096863
f__unclassified_p__Candidatus_Hydrothermota	50.873	0.00049084	67.1419	0.00019404
f__Pucciniaceae	50.6694	0.00048888	484.388	0.00139989
f__Tepidisphaeraceae	50.6235	0.00048843	1076.42	0.00311087
f__Amorphaceae	50.6197	0.0004884	3964.61	0.0114578
f__Acaryochloridaceae	50.5178	0.00048741	773.917	0.00223664
f__Salinibacteraceae	50.4237	0.00048651	308.355	0.00089115
f__Clavariaceae	49.8505	0.00048098	0	0
f__Geitlerinemataceae	49.6294	0.00047884	400.256	0.00115675
f__Pichiaceae	49.4361	0.00047698	1002.1	0.00289608
f__Crenotrichaceae	48.9368	0.00047216	199.795	0.00057741
f__unclassified_p__Candidatus_Berkelbacteria	48.919	0.00047199	264.67	0.0007649
f__Candidatus_Uabimicrobiaceae	48.8637	0.00047145	64.0711	0.00018517
f__unclassified_p__Candidatus_Doudnaibacteriota	48.6736	0.00046962	156.945	0.00045358
f__Candidatus_Hinthialibacteraceae	47.6881	0.00046011	281.786	0.00081437
f__unclassified_o__Ichthyophonida	47.0728	0.00045418	1630.78	0.004713
f__Trueperaceae	46.8949	0.00045246	232.362	0.00067153
f__unclassified_o__Archaeoglobales	46.8035	0.00045158	265.159	0.00076631
f__Dothidotthiaceae	46.6105	0.00044971	22.0065	6.36e-05
f__Haloferacaceae	46.2134	0.00044588	199.478	0.00057649
f__Microthrixaceae	46.2014	0.00044577	2373.89	0.00686059
f__Ascarididae	46.189	0.00044565	3.9575	1.144e-05
f__Clavicipitaceae	46.172	0.00044548	232.277	0.00067129
f__Haloarculaceae	46.1001	0.00044479	151.494	0.00043782
f__Acanthamoebidae	45.9839	0.00044367	1040.59	0.00300732
f__unclassified_p__Candidatus_Heimdallarchaeota	45.9821	0.00044365	1080.34	0.00312219
f__unclassified_o__Pleosporales	45.7971	0.00044187	22.0419	6.37e-05
f__Pseudocohnilembidae	45.5368	0.00043936	102.009	0.00029481
f__Ktedonobacteraceae	44.9891	0.00043407	312.258	0.00090243
f__Immundisolibacteraceae	44.8884	0.0004331	56.8848	0.0001644
f__Blastochloridaceae	44.8187	0.00043243	913.671	0.00264053
f__Erysiphaceae	44.8172	0.00043241	219.088	0.00063317
f__Merismopediaceae	44.6879	0.00043116	240.771	0.00069583
f__Ahrensiaceae	44.1663	0.00042613	18083.9	0.0522629
f__Candidatus_Gastranaerophilaceae	44.0586	0.00042509	969.517	0.00280193
f__Rhodothermaceae	44.0351	0.00042487	433.928	0.00125406
f__unclassified_p__Bacteroidota	43.989	0.00042442	502.498	0.00145223
f__Chordaceae	43.7316	0.00042194	188.157	0.00054378
f__Chryseotaleaceae	43.0231	0.0004151	272.897	0.00078868
f__Dissulfuribacteraceae	42.9378	0.00041428	230.478	0.00066609
f__Microviridae	41.9323	0.00040458	525.59	0.00151897
f__Coraliomargaritaceae	41.5006	0.00040041	317.328	0.00091708
f__Thiolinaceae	41.2005	0.00039752	950.21	0.00274613
f__Reticulibacteraceae	41.0956	0.00039651	98.5936	0.00028494
f__Thermosporotrichaceae	40.8483	0.00039412	40.3364	0.00011657
f__Coniothyriaceae	40.6723	0.00039242	0.9993	2.89e-06
f__Desulfurellaceae	40.5981	0.0003917	79.8714	0.00023083
f__Candidatus_Calditenuaceae	40.1158	0.00038705	39.2213	0.00011335
f__unclassified_p__Candidatus_Altarchaeota	40.0675	0.00038659	65.1864	0.00018839
f__Pezizaceae	40.0429	0.00038635	95.9443	0.00027728
f__Vahlkampfiidae	39.8675	0.00038466	428.269	0.00123771
f__Bondarzewiaceae	39.7492	0.00038352	0	0
f__unclassified_p__Candidatus_Desantisbacteria	39.7469	0.00038349	1527.08	0.00441328
f__Hepatosporidae	39.5497	0.00038159	4951.13	0.0143089
f__Monodopsidaceae	38.9609	0.00037591	671.683	0.00194118
f__Aggregatilineaceae	38.8534	0.00037487	285.149	0.00082409
f__unclassified_p__Candidatus_Gribaldobacteria	38.6317	0.00037273	211.757	0.00061198
f__unclassified_c__Hydrogenophilia	38.4505	0.00037098	394.443	0.00113995
f__Euzebyaceae	38.4415	0.0003709	828.572	0.00239459
f__Dubosqiidae	38.2569	0.00036912	37283.6	0.10775
f__unclassified_p__candidate_division_CPR1	38.0502	0.00036712	267.482	0.00077303
f__Pseudohongiellaceae	37.7832	0.00036455	177.415	0.00051273
f__Candidatus_Ancaeobacteraceae	37.405	0.0003609	23.8356	6.889e-05
f__Wenzhouxiangellaceae	37.3998	0.00036085	505.654	0.00146135
f__Glomerellaceae	37.3531	0.0003604	775.922	0.00224243
f__Hydrococcaceae	37.3192	0.00036007	305.174	0.00088196
f__Desulfosalsimonadaceae	37.092	0.00035788	278.193	0.00080398
f__Entophysalidaceae	37.0746	0.00035771	45.9704	0.00013286
f__Alcanivoracaceae	37.064	0.00035761	1859.56	0.00537416
f__Candidatus_Magnetobacteriaceae	37.0552	0.00035752	66.6691	0.00019268
f__Fabaceae	36.9575	0.00035658	41.4733	0.00011986
f__Porphyridiaceae	36.9446	0.00035645	157.922	0.0004564
f__Candidatus_Puniceispirillaceae	36.8936	0.00035596	1801.52	0.00520644
f__Sporichthyaceae	36.5979	0.00035311	680.953	0.00196797
f__Owenweeksiaceae	36.5343	0.0003525	124.766	0.00036058
f__unclassified_o__Candidatus_Altarchaeales	36.0153	0.00034749	376.569	0.00108829
f__Pleurotaceae	35.9612	0.00034697	118.851	0.00034348
f__Gloeomargaritaceae	35.5736	0.00034323	66.6734	0.00019269
f__Trichloromonadaceae	35.4277	0.00034182	227.124	0.00065639
f__Motilibacteraceae	35.2611	0.00034021	316.547	0.00091483
f__Lophiotremataceae	35.1326	0.00033897	0	0
f__Magnetovibrionaceae	34.8452	0.0003362	4520.38	0.013064
f__Thorselliaceae	34.7525	0.0003353	30.7799	8.895e-05
f__Tepidamorphaceae	34.6824	0.00033463	4610.57	0.0133246
f__Candidatus_Nanosynbacteraceae	34.6482	0.0003343	95.7147	0.00027662
f__Suessiaceae	34.3349	0.00033128	449.799	0.00129993
f__Debaryomycetaceae	34.2491	0.00033045	690.461	0.00199545
f__Mycenaceae	34.1423	0.00032942	249.131	0.00071999
f__Candidatus_Wolframiiraptoraceae	34.0388	0.00032842	443.543	0.00128185
f__unclassified_p__Cryptomycota	33.8538	0.00032663	914.838	0.0026439
f__Rhodoblastaceae	33.8328	0.00032643	3807.11	0.0110026
f__Lentisphaeraceae	33.6795	0.00032495	291.945	0.00084373
f__unclassified_p__Candidatus_Yanofskyibacteriota	33.3443	0.00032172	144.241	0.00041686
f__Candidatus_Termititenacaceae	33.1079	0.00031944	1358.51	0.00392613
f__Catalimonadaceae	33.0879	0.00031924	1275.71	0.00368683
f__Candidatus_Geothermincolaceae	32.9148	0.00031757	421.809	0.00121904
f__Xenococcaceae	32.6303	0.00031483	216.954	0.000627
f__unclassified_o__Hymenostomatida	32.5969	0.00031451	150.922	0.00043617
f__Zooshikellaceae	32.4485	0.00031308	517.372	0.00149522
f__Tsukamurellaceae	32.43	0.0003129	152.938	0.00044199
f__Candidatus_Ozemobacteraceae	32.3124	0.00031176	66.777	0.00019299
f__Coelosphaeriaceae	32.1363	0.00031006	222.868	0.00064409
f__unclassified_p__Candidatus_Binatota	32.0993	0.00030971	414.605	0.00119822
f__unclassified_o__Oscillatoriales	31.9487	0.00030825	167.163	0.0004831
f__Fimbriimonadaceae	31.8667	0.00030746	497.839	0.00143876
f__Archaeoglobaceae	31.836	0.00030717	253.808	0.00073351
f__Tepidiformaceae	31.7618	0.00030645	253.077	0.0007314
f__Reichenbachiellaceae	31.4187	0.00030314	1292.69	0.00373589
f__Methylothermaceae	31.4053	0.00030301	1018.87	0.00294456
f__Parvularculaceae	31.3673	0.00030264	2001.14	0.00578335
f__unclassified_p__Candidatus_Hinthialibacterota	31.1628	0.00030067	75.3853	0.00021787
f__Chytridiaceae	31.1449	0.0003005	1042.18	0.00301191
f__Vicinamibacteraceae	30.6829	0.00029604	735.354	0.00212519
f__Spongiibacteraceae	30.2569	0.00029193	331.562	0.00095822
f__unclassified_c__Dothideomycetes	30.2153	0.00029153	91.286	0.00026382
f__unclassified_c__Dinophyceae	30.2003	0.00029138	68.4663	0.00019787
f__Ferrovaceae	29.928	0.00028876	197.315	0.00057024
f__Thermosulfidibacteraceae	29.8137	0.00028765	27.0811	7.826e-05
f__Endogonaceae	29.7885	0.00028741	304.753	0.00088074
f__Entomophthoraceae	29.7322	0.00028687	251.469	0.00072675
f__Autographiviridae	29.6555	0.00028613	3800.42	0.0109833
f__Cavosteliaceae	29.6372	0.00028595	729.672	0.00210877
f__unclassified_p__Candidatus_Calescamantes	29.6227	0.00028581	133.063	0.00038456
f__unclassified_p__Candidatus_Caldatribacteriota	29.5091	0.00028471	245.089	0.00070831
f__Gomontiellaceae	29.3149	0.00028284	361.909	0.00104593
f__Elioraeaceae	29.307	0.00028276	1918.14	0.00554347
f__Sandaracinaceae	29.2	0.00028173	1119.29	0.00323478
f__unclassified_o__Methanomassiliicoccales	29.0041	0.00027984	455.257	0.0013157
f__Robiginitomaculaceae	28.9828	0.00027964	3140.48	0.00907606
f__unclassified_p__Candidatus_Levyibacteriota	28.7938	0.00027781	126.045	0.00036427
f__unclassified_p__Candidatus_Staskawicziibacteriota	28.4731	0.00027472	217.878	0.00062967
f__Sphaerobolaceae	28.4665	0.00027466	81.8403	0.00023652
f__unclassified_o__Methanomicrobiales	28.4555	0.00027455	392.65	0.00113477
f__unclassified_o__Mycobacteriales	28.3797	0.00027382	230.683	0.00066668
f__Natronoarchaeaceae	28.3224	0.00027326	13.2658	3.834e-05
f__Flexibacteraceae	28.2643	0.0002727	128.339	0.0003709
f__unclassified_p__Candidatus_Handelsmaniibacteriota	28.2573	0.00027264	362.809	0.00104852
f__Sclerotiniaceae	28.2377	0.00027245	32.2772	9.328e-05
f__Crambidae	28.1147	0.00027126	16.1556	4.669e-05
f__Lobulomycetaceae	27.9436	0.00026961	483.495	0.00139731
f__Salinarimonadaceae	27.8124	0.00026834	1361.78	0.00393558
f__Peribunyaviridae	27.727	0.00026752	0	0
f__Magnetospirillaceae	27.5513	0.00026582	1109.03	0.00320512
f__Chlorogloeopsidaceae	27.4907	0.00026524	109.476	0.00031639
f__Afifellaceae	27.2068	0.0002625	5121.76	0.014802
f__Salibacteraceae	26.838	0.00025894	118.128	0.00034139
f__Notoacmeibacteraceae	26.5392	0.00025606	7450.68	0.0215326
f__unclassified_o__Entomoplasmatales	26.5034	0.00025571	82.7769	0.00023923
f__Bradymonadaceae	26.3818	0.00025454	98.6477	0.00028509
f__Saccotheciaceae	26.1465	0.00025227	377.975	0.00109236
f__Desulfobaccaceae	26.0686	0.00025152	2473.98	0.00714985
f__Winoviridae	26.0332	0.00025118	0	0
f__Iridoviridae	25.9611	0.00025048	101.651	0.00029377
f__Thiohalomonadaceae	25.7952	0.00024888	139.893	0.00040429
f__Metschnikowiaceae	25.7804	0.00024874	104.345	0.00030156
f__Trematosphaeriaceae	25.5468	0.00024648	8.5092	2.459e-05
f__Oligoflexaceae	25.5012	0.00024604	328.959	0.0009507
f__Acytosteliaceae	25.4398	0.00024545	596.201	0.00172303
f__unclassified_p__Candidatus_Coatesiibacteriota	25.4123	0.00024519	125.749	0.00036342
f__Salsipaludibacteraceae	25.3965	0.00024503	359.728	0.00103962
f__Geopsychrobacteraceae	25.3058	0.00024416	985.351	0.00284769
f__Candidatus_Krumholzibacteriaceae	25.2758	0.00024387	87.0749	0.00025165
f__Reticulomyxidae	25.162	0.00024277	202.1	0.00058407
f__Hypocreaceae	25.1595	0.00024275	97.838	0.00028275
f__Candidatus_Palauibacteraceae	25.0959	0.00024213	239.06	0.00069089
f__unclassified_p__Candidatus_Azambacteria	25.0005	0.00024121	129.324	0.00037375
f__Limisphaeraceae	24.9877	0.00024109	120.668	0.00034873
f__Tectiviridae	24.9459	0.00024069	21.4995	6.213e-05
f__Lichenihabitantaceae	24.4921	0.00023631	317.947	0.00091887
f__unclassified_c__Chlorarachniophyceae	24.3583	0.00023502	99.6196	0.0002879
f__Pseudoperisporiaceae	24.3154	0.0002346	1.2098	3.5e-06
f__Lindgomycetaceae	24.2797	0.00023426	13.033	3.767e-05
f__Segnochrobactraceae	24.2149	0.00023363	352.563	0.00101891
f__unclassified_c__Nitrososphaeria	24.1025	0.00023255	131.642	0.00038045
f__Hexamitidae	24.0173	0.00023173	1065.85	0.00308034
f__Suoliviridae	23.9119	0.00023071	1215.62	0.00351318
f__Dietziaceae	23.7039	0.0002287	798.167	0.00230672
f__Sulfolobaceae	23.627	0.00022796	95.5557	0.00027616
f__Puniceicoccaceae	23.5793	0.0002275	17.2212	4.977e-05
f__Melanommataceae	23.4473	0.00022623	0	0
f__unclassified_o__Thermoproteales	23.444	0.0002262	17.6793	5.109e-05
f__Tepidibacteraceae	23.414	0.00022591	638.49	0.00184525
f__unclassified_c__Cryptophyceae	23.3887	0.00022566	329.042	0.00095094
f__Desulfurisporaceae	22.9302	0.00022124	42.8225	0.00012376
f__Torulaceae	22.8954	0.0002209	0	0
f__Candidatus_Hakubellaceae	22.8182	0.00022016	340.322	0.00098354
f__Candelariaceae	22.4341	0.00021645	48.7642	0.00014093
f__unclassified_p__Candidatus_Fervidibacterota	22.4301	0.00021641	72.2659	0.00020885
f__Hydrogenophilaceae	22.2376	0.00021456	333.905	0.00096499
f__Nimaviridae	22.1508	0.00021372	3966.87	0.0114643
f__Candidatus_Obscuribacteraceae	22.0493	0.00021274	66.6976	0.00019276
f__Juglanconidaceae	21.8324	0.00021065	0	0
f__Choanephoraceae	21.823	0.00021056	270.005	0.00078032
f__unclassified_c__Centroplasthelida	21.7713	0.00021006	261.348	0.0007553
f__Microbotryaceae	21.7629	0.00020998	39.2269	0.00011337
f__Podosporaceae	21.748	0.00020983	55.6611	0.00016086
f__Bombycidae	21.7342	0.0002097	449.439	0.00129889
f__Candidatus_Poseidoniaceae	21.631	0.0002087	16.2166	4.687e-05
f__Strophariaceae	21.5991	0.0002084	49.7594	0.00014381
f__Candidatus_Amarolineaceae	21.555	0.00020797	683.612	0.00197565
f__Cyanomargaritaceae	21.5425	0.00020785	18.2708	5.28e-05
f__Trypanosomatidae	21.4151	0.00020662	182.29	0.00052682
f__Cavenderiaceae	21.3676	0.00020616	308.819	0.00089249
f__Amniculicolaceae	21.3037	0.00020555	0	0
f__Orbiliaceae	21.1669	0.00020423	403.002	0.00116468
f__Stigonemataceae	21.153	0.00020409	3.7395	1.081e-05
f__unclassified_o__Candidatus_Acidulodesulfobacterales	21.1369	0.00020394	77.2711	0.00022332
f__Natrialbaceae	21.1025	0.00020361	272.143	0.0007865
f__Catenulisporaceae	21.0156	0.00020277	329.011	0.00095085
f__Zopfiaceae	21.0032	0.00020265	21.3606	6.173e-05
f__Salasmaviridae	20.8411	0.00020108	6542.78	0.0189088
f__Thermoflexaceae	20.783	0.00020052	168.51	0.000487
f__Physodermataceae	20.6867	0.00019959	689.523	0.00199274
f__unclassified_p__Candidatus_Schekmaniibacteriota	20.6602	0.00019934	247.478	0.00071522
f__Methanocellaceae	20.6521	0.00019926	310.132	0.00089629
f__Zavarziniaceae	20.6223	0.00019897	1208.08	0.00349139
f__unclassified_o__Endogonales	20.6125	0.00019888	77.1276	0.0002229
f__Bionectriaceae	20.5098	0.00019789	32.1425	9.289e-05
f__Spizellomycetaceae	20.1648	0.00019456	636.934	0.00184075
f__Botryosphaeriaceae	20.0569	0.00019352	70.6218	0.0002041
f__Powellomycetaceae	19.8635	0.00019165	1019.36	0.00294597
f__Carbonactinosporaceae	19.8165	0.0001912	255.281	0.00073777
f__Ferrimonadaceae	19.811	0.00019114	275.459	0.00079608
f__Candidatus_Hydromicrobiaceae	19.7512	0.00019057	57.2965	0.00016559
f__unclassified_c__Pelagophyceae	19.7355	0.00019042	73.1916	0.00021153
f__Geminigeraceae	19.6879	0.00018996	456.844	0.00132029
f__Vallicoccaceae	19.6358	0.00018945	197.521	0.00057084
f__unclassified_c__Archaeoglobi	19.5373	0.0001885	0	0
f__Candidatus_Erginobacteraceae	19.5331	0.00018846	54.9996	0.00015895
f__Sanguibacteraceae	19.5215	0.00018835	56.1755	0.00016235
f__Apusomonadidae	19.3571	0.00018676	622.729	0.0017997
f__Sphaerophragmiaceae	19.2619	0.00018585	156.943	0.00045357
f__Thraustochytriaceae	19.2572	0.0001858	255.183	0.00073748
f__Laspinemataceae	19.2111	0.00018536	79.9161	0.00023096
f__Halarsenatibacteraceae	19.2046	0.00018529	58.8796	0.00017016
f__Phycodnaviridae	19.1071	0.00018435	29.5841	8.55e-05
f__Hydrogenimonadaceae	18.8894	0.00018225	366.569	0.00105939
f__Nitriliruptoraceae	18.7003	0.00018043	838.295	0.00242269
f__Plasmodiophoridae	18.6854	0.00018028	368.743	0.00106568
f__Raperosteliaceae	18.5606	0.00017908	302.315	0.0008737
f__Galdieriaceae	18.5042	0.00017854	339.506	0.00098118
f__unclassified_o__Tremellales	18.4199	0.00017772	25.5661	7.389e-05
f__Rhizophlyctidaceae	18.3619	0.00017716	574.926	0.00166155
f__unclassified_p__Candidatus_Giovannonibacteria	18.3174	0.00017673	10.687	3.089e-05
f__Lophiostomataceae	18.2725	0.0001763	12.7116	3.674e-05
f__Egibacteraceae	18.1456	0.00017508	187.441	0.00054171
f__unclassified_o__Flavobacteriales	17.6435	0.00017023	6027.8	0.0174205
f__unclassified_p__Candidatus_Fischeribacteriota	17.6012	0.00016982	8.6822	2.509e-05
f__Ectocarpaceae	17.2786	0.00016671	301.774	0.00087213
f__Woeseiaceae	17.2746	0.00016667	473.315	0.00136789
f__Pelomyxidae	17.2251	0.00016619	379.402	0.00109648
f__unclassified_o__Candidatus_Sulfidibacteriales	17.2016	0.00016597	558.936	0.00161534
f__Vilmaviridae	17.17	0.00016566	0	0
f__Anaerosomataceae	17.1273	0.00016525	150.268	0.00043428
f__Desertifilaceae	17.123	0.00016521	132.637	0.00038332
f__unclassified_o__Mariprofundales	17.0293	0.0001643	131.446	0.00037988
f__Criblamydiaceae	16.919	0.00016324	56.321	0.00016277
f__Phycisphaeraceae	16.8054	0.00016214	965.736	0.002791
f__Intestiviridae	16.7448	0.00016156	748.237	0.00216242
f__Pelagomonadaceae	16.7111	0.00016123	195.985	0.0005664
f__Entamoebidae	16.6777	0.00016091	3441.23	0.00994523
f__Candidatus_Fermentithermobacillaceae	16.6089	0.00016025	548.135	0.00158412
f__Candidatus_Sumerlaeaceae	16.3924	0.00015816	160.671	0.00046434
f__Hapalidiaceae	16.3565	0.00015781	3.4732	1.004e-05
f__unclassified_c__Candidatus_Limnocylindria	16.2488	0.00015677	129.256	0.00037355
f__Prochloraceae	16.1596	0.00015591	590.571	0.00170676
f__Ploettnerulaceae	16.1439	0.00015576	6.9568	2.011e-05
f__Naviculaceae	16.1366	0.00015569	1003.63	0.00290051
f__Diplonemidae	16.097	0.00015531	586.103	0.00169385
f__unclassified_o__Synechococcales	16.0948	0.00015529	146.575	0.0004236
f__Retroviridae	16.0885	0.00015523	516.602	0.00149299
f__Acanthopleuribacteraceae	15.9936	0.00015431	366.8	0.00106006
f__unclassified_p__Candidatus_Edwardsiibacteriota	15.9081	0.00015349	274.841	0.0007943
f__Stellaceae	15.889	0.0001533	1816.76	0.00525048
f__Sporormiaceae	15.8083	0.00015252	5.6708	1.639e-05
f__Lentitheciaceae	15.6732	0.00015122	3.135	9.06e-06
f__Chthonomonadaceae	15.6601	0.00015109	52.6714	0.00015222
f__Triparmaceae	15.6498	0.00015099	364.439	0.00105324
f__Trichomonadidae	15.5864	0.00015038	2138.33	0.00617982
f__Schizosaccharomycetaceae	15.5736	0.00015026	371.998	0.00107508
f__Tilletiaceae	15.5692	0.00015022	461.272	0.00133309
f__Sparassidaceae	15.5158	0.0001497	12.3071	3.557e-05
f__Candidatus_Bathyanammoxibiaceae	15.4964	0.00014951	316.903	0.00091586
f__Chattonellaceae	15.4721	0.00014928	30.8826	8.925e-05
f__unclassified_p__Cressdnaviricota	15.1774	0.00014644	1496.78	0.00432573
f__Candidatus_Lernaellaceae	15.0291	0.00014501	23.1857	6.701e-05
f__Antricoccaceae	15.0229	0.00014495	37.1691	0.00010742
f__Xylariaceae	15.0098	0.00014482	240.622	0.0006954
f__Granulosicoccaceae	14.8702	0.00014347	785.789	0.00227095
f__unclassified_p__Candidatus_Curtissbacteria	14.8682	0.00014345	24.4745	7.073e-05
f__Salaquimonadaceae	14.8484	0.00014326	33839.4	0.0977966
f__unclassified_c__Candidatus_Marinamargulisbacteria	14.6569	0.00014141	78.5409	0.00022698
f__unclassified_p__Ascomycota	14.6245	0.0001411	167.506	0.0004841
f__Egicoccaceae	14.5974	0.00014084	190.355	0.00055013
f__Phacaceae	14.4765	0.00013967	3.8806	1.122e-05
f__unclassified_o__Candidatus_Caenarcanales	14.4503	0.00013942	1370.12	0.00395968
f__Ascosphaeraceae	14.4434	0.00013935	81.9924	0.00023696
f__unclassified_c__Thermomicrobia	14.4299	0.00013923	17.6789	5.109e-05
f__Thermonemataceae	14.3604	0.00013855	59.4885	0.00017192
f__Propylenellaceae	14.2643	0.00013763	3502.2	0.0101214
f__unclassified_p__Fornicata	14.2184	0.00013718	314.06	0.00090764
f__Dictyotaceae	13.9595	0.00013469	26.4442	7.642e-05
f__Cyphellophoraceae	13.9448	0.00013454	42.1748	0.00012189
f__Nowakowskiellaceae	13.9372	0.00013447	391.384	0.00113111
f__Phreatobacteraceae	13.9224	0.00013433	1525.79	0.00440956
f__Raineyaceae	13.8984	0.0001341	331.677	0.00095855
f__unclassified_p__Candidatus_Marsarchaeota	13.7823	0.00013298	142.798	0.00041269
f__Shiraiaceae	13.7405	0.00013257	0	0
f__Casimicrobiaceae	13.6804	0.00013199	41.2284	0.00011915
f__unclassified_o__Candidatus_Obscuribacterales	13.622	0.00013143	606.797	0.00175366
f__Bernardetiaceae	13.5572	0.0001308	160.553	0.000464
f__Circoviridae	13.5056	0.00013031	0	0
f__Methylopilaceae	13.4189	0.00012947	1955.79	0.00565228
f__Rhodomelaceae	13.3954	0.00012924	69.285	0.00020024
f__Terramycetaceae	13.3666	0.00012897	321.813	0.00093005
f__Candidatus_Mcinerneyibacteriaceae	13.337	0.00012868	121.251	0.00035042
f__Tulasnellaceae	13.242	0.00012776	180.16	0.00052067
f__Haliovirgaceae	13.1832	0.0001272	91.625	0.0002648
f__unclassified_p__Candidatus_Wolfebacteria	13.1315	0.0001267	49.3515	0.00014263
f__Aerosakkonemataceae	13.0475	0.00012589	14.7544	4.264e-05
f__Schizophyllaceae	13.0137	0.00012556	73.1353	0.00021136
f__Beutenbergiaceae	12.8495	0.00012398	79.1649	0.00022879
f__Tetraplosphaeriaceae	12.7981	0.00012348	0	0
f__Synchytriaceae	12.7761	0.00012327	649.867	0.00187813
f__Phanerochaetaceae	12.7253	0.00012278	58.3021	0.00016849
f__Kyanoviridae	12.6106	0.00012167	111.364	0.00032184
f__unclassified_p__Chloroflexota	12.5793	0.00012137	22.4422	6.486e-05
f__Candidatus_Magnetaquicoccaceae	12.5514	0.0001211	430.456	0.00124403
f__Morchellaceae	12.5079	0.00012068	44.643	0.00012902
f__Gorgonomycetaceae	12.4985	0.00012059	475.97	0.00137556
f__Meripilaceae	12.4922	0.00012053	39.2794	0.00011352
f__Mycosphaerellaceae	12.4823	0.00012043	140.643	0.00040646
f__unclassified_o__Candidatus_Poseidoniales	12.4505	0.00012013	194.36	0.00056171
f__unclassified_o__Polychytriales	12.4356	0.00011998	293.056	0.00084694
f__Olpidiaceae	12.4315	0.00011994	144.83	0.00041856
f__unclassified_p__Candidatus_Lloydiibacteriota	12.3789	0.00011944	48.8288	0.00014112
f__unclassified_p__Candidatus_Tayloriibacteriota	12.3662	0.00011931	72.0244	0.00020815
f__unclassified_o__Xylariales	12.3376	0.00011904	131.812	0.00038094
f__Blattabacteriaceae	12.3255	0.00011892	193.977	0.0005606
f__Thalassiosiraceae	12.3204	0.00011887	208.906	0.00060374
f__unclassified_p__Candidatus_Glassiibacteriota	12.3098	0.00011877	318.179	0.00091954
f__Oleiphilaceae	12.3062	0.00011873	124.315	0.00035927
f__Kallotenuaceae	12.2697	0.00011838	77.5464	0.00022411
f__Sordariaceae	12.1148	0.00011689	63.7689	0.00018429
f__Filobasidiaceae	12.112	0.00011686	38.3936	0.00011096
f__unclassified_p__Candidatus_Ratteibacteria	12.0736	0.00011649	81.7446	0.00023624
f__unclassified_o__Chytridiales	12.0681	0.00011644	257.602	0.00074447
f__Stanwilliamsviridae	12.0511	0.00011627	203.147	0.0005871
f__Albuginaceae	12.0494	0.00011626	106.234	0.00030702
f__unclassified_p__Candidatus_Microgenomates	11.881	0.00011463	70.0717	0.00020251
f__unclassified_p__Armatimonadota	11.829	0.00011413	43.2248	0.00012492
f__Desulfosudaceae	11.793	0.00011378	84.211	0.00024337
f__unclassified_p__Candidatus_Anderseniibacteriota	11.7786	0.00011364	0	0
f__Cladochytriaceae	11.7757	0.00011362	321.663	0.00092961
f__Balneatrichaceae	11.7489	0.00011336	149.092	0.00043088
f__Rhodellaceae	11.7388	0.00011326	14.1207	4.081e-05
f__Mangrovivirgaceae	11.701	0.0001129	427.707	0.00123608
f__Thermoguttaceae	11.6604	0.0001125	1817.54	0.00525272
f__Coelomomycetaceae	11.6008	0.00011193	148.995	0.0004306
f__Cryptococcaceae	11.595	0.00011187	128.655	0.00037182
f__Alsobacteraceae	11.478	0.00011074	1861.02	0.00537839
f__Thermofilaceae	11.3506	0.00010951	132.323	0.00038242
f__Harpellaceae	11.2905	0.00010893	67.9179	0.00019628
f__Herpetosiphonaceae	11.2432	0.00010848	92.1615	0.00026635
f__Ophiocordycipitaceae	11.2227	0.00010828	40.9413	0.00011832
f__Leeiaceae	11.2223	0.00010828	72.0502	0.00020823
f__Oceanococcaceae	11.1943	0.00010801	29.197	8.438e-05
f__Ophiocytiaceae	11.1623	0.0001077	0	0
f__Pleurochloridaceae	11.0899	0.000107	0.83	2.4e-06
f__Sympoventuriaceae	11.0648	0.00010676	8.7296	2.523e-05
f__Sirenicapillariaceae	10.9336	0.00010549	27.2777	7.883e-05
f__Bangiaceae	10.9321	0.00010548	259.874	0.00075104
f__Dissulfurirhabdaceae	10.9301	0.00010546	123.497	0.00035691
f__Chloroherpetonaceae	10.9166	0.00010533	31.2598	9.034e-05
f__unclassified_p__Candidatus_Zambryskiibacteriota	10.9055	0.00010522	198.02	0.00057228
f__Fonticulaceae	10.791	0.00010411	2704.15	0.00781504
f__Noelaerhabdaceae	10.7424	0.00010365	282.18	0.00081551
f__Thiohalophilaceae	10.7017	0.00010325	17.861	5.162e-05
f__Aurantibacillaceae	10.688	0.00010312	6.6624	1.925e-05
f__Ruaniaceae	10.6799	0.00010304	80.4152	0.0002324
f__Microscillaceae	10.6742	0.00010299	55.1468	0.00015938
f__unclassified_p__candidate_division_KD3-62	10.6052	0.00010232	112.134	0.00032407
f__unclassified_p__Candidatus_Liptoniibacteriota	10.5911	0.00010219	77.1552	0.00022298
f__Microdochiaceae	10.5851	0.00010213	49.478	0.00014299
f__Rhabdaerophilaceae	10.5175	0.00010148	875.375	0.00252985
f__Armatimonadaceae	10.4943	0.00010125	46.4983	0.00013438
f__Ostreibacteriaceae	10.4594	0.00010092	1.7077	4.94e-06
f__Mollisiaceae	10.306	9.944e-05	134.132	0.00038764
f__Cryptobasidiaceae	10.2669	9.906e-05	11.1732	3.229e-05
f__Fontisphaeraceae	10.2551	9.894e-05	40.9075	0.00011822
f__Blastocystidae	10.2479	9.888e-05	254.37	0.00073513
f__Pluteaceae	10.1448	9.788e-05	0	0
f__Tetraodontidae	9.9898	9.639e-05	68.4627	0.00019786
f__Plasmodiidae	9.9763	9.625e-05	436.512	0.00126153
f__Acidothermaceae	9.9515	9.602e-05	201.556	0.0005825
f__Candidatus_Auribacteraceae	9.9216	9.573e-05	18.3943	5.316e-05
f__Straboviridae	9.8022	9.458e-05	2566.91	0.00741841
f__Wickerhamomycetaceae	9.7824	9.438e-05	273.699	0.000791
f__Melioribacteraceae	9.7801	9.436e-05	309.631	0.00089484
f__Blastocladiaceae	9.7742	9.43e-05	692.947	0.00200263
f__Bacillariaceae	9.7371	9.395e-05	465.061	0.00134404
f__Euglenaceae	9.6981	9.357e-05	0.3985	1.15e-06
f__Stylonemataceae	9.5914	9.254e-05	78.391	0.00022655
f__Salisaetaceae	9.4673	9.134e-05	59.6936	0.00017252
f__Diaporthaceae	9.4103	9.079e-05	54.6337	0.00015789
f__Sporocadaceae	9.3835	9.054e-05	33.4143	9.657e-05
f__Eimeriidae	9.382	9.052e-05	28.5308	8.245e-05
f__Tuberaceae	9.3031	8.976e-05	109.182	0.00031554
f__unclassified_c__Spartobacteria	9.2962	8.969e-05	13.495	3.9e-05
f__Alloherpesviridae	9.2936	8.967e-05	0	0
f__Haladaptataceae	9.186	8.863e-05	75.2859	0.00021758
f__Chaetocerotaceae	9.1795	8.857e-05	269.859	0.0007799
f__Candidatus_Hatepunaeaceae	9.155	8.833e-05	65.0237	0.00018792
f__Serpulaceae	9.1061	8.786e-05	13.1853	3.811e-05
f__Silvanigrellaceae	9.0818	8.762e-05	206.13	0.00059572
f__Rhodobiaceae	9.072	8.753e-05	2549.1	0.00736695
f__Ophiostomataceae	9.0371	8.719e-05	7.7332	2.235e-05
f__unclassified_c__Halobacteria	9.0202	8.703e-05	29.5258	8.533e-05
f__unclassified_o__Candidatus_Cloacimonadales	9.0115	8.695e-05	157.975	0.00045655
f__Lagenidiaceae	8.9989	8.682e-05	185.124	0.00053501
f__unclassified_o__Jakobida	8.7547	8.447e-05	32.8285	9.487e-05
f__Phaffomycetaceae	8.7396	8.432e-05	377.989	0.00109239
f__unclassified_c__Chytridiomycetes	8.6973	8.391e-05	554.432	0.00160232
f__Collodictyonidae	8.6328	8.329e-05	0	0
f__Thermodesulfobiaceae	8.6067	8.304e-05	6.2937	1.819e-05
f__Rhodocytophagaceae	8.6062	8.304e-05	193.217	0.0005584
f__unclassified_p__Candidatus_Amesbacteria	8.5802	8.278e-05	37.333	0.00010789
f__Symphyonemataceae	8.5736	8.272e-05	5.1208	1.48e-05
f__Pyriculariaceae	8.5547	8.254e-05	7.464	2.157e-05
f__Onygenaceae	8.5206	8.221e-05	90.1853	0.00026064
f__Candidatus_Sulfomarinibacteraceae	8.5141	8.215e-05	707.424	0.00204447
f__Sarocladiaceae	8.509	8.21e-05	0	0
f__Candidatus_Nanoperiomorbaceae	8.4864	8.188e-05	5.4762	1.583e-05
f__Nannizziopsiaceae	8.4537	8.156e-05	0	0
f__unclassified_c__Kiritimatiellia	8.4151	8.119e-05	125.749	0.00036342
f__Bruguierivoracaceae	8.4123	8.116e-05	415.979	0.00120219
f__Histionidae	8.4068	8.111e-05	16.5452	4.782e-05
f__unclassified_p__Candidatus_Wildermuthiibacteriota	8.3653	8.071e-05	39.0219	0.00011277
f__unclassified_p__Candidatus_Kryptoniota	8.3244	8.032e-05	219.437	0.00063418
f__Hyaloscyphaceae	8.231	7.942e-05	0	0
f__Schizomimiviridae	8.2189	7.93e-05	10.9577	3.167e-05
f__Gelatoporiaceae	8.1806	7.893e-05	12.1441	3.51e-05
f__Ochromonadaceae	8.1783	7.891e-05	394.302	0.00113954
f__Rhizonemataceae	8.0509	7.768e-05	184.248	0.00053248
f__Amanitaceae	8.029	7.747e-05	4342.53	0.01255
f__Picomonadidae	8.0081	7.727e-05	26.6808	7.711e-05
f__Enterocytozoonidae	7.9952	7.714e-05	7003.47	0.0202402
f__Candidatus_Desulfofervidaceae	7.9278	7.649e-05	116.578	0.00033691
f__Casjensviridae	7.8845	7.607e-05	20.8488	6.025e-05
f__Diversisporaceae	7.8808	7.604e-05	290.259	0.00083885
f__Cordycipitaceae	7.8436	7.568e-05	66.5895	0.00019245
f__Panaceae	7.8273	7.552e-05	28.2295	8.158e-05
f__Dermocarpellaceae	7.8079	7.533e-05	4.6084	1.332e-05
f__Chamaesiphonaceae	7.7528	7.48e-05	216.734	0.00062637
f__Lusitaniellaceae	7.7486	7.476e-05	25.4945	7.368e-05
f__Salinicoccaceae	7.6865	7.416e-05	123.337	0.00035645
f__Culicidae	7.6837	7.414e-05	139.021	0.00040177
f__Tremellaceae	7.6823	7.412e-05	13.4802	3.896e-05
f__Candidatus_Berkiellaceae	7.6052	7.338e-05	13.9193	4.023e-05
f__unclassified_p__Candidatus_Raymondiibacteriota	7.5034	7.24e-05	429.44	0.00124109
f__unclassified_p__Candidatus_Buchananiibacteriota	7.4782	7.215e-05	48.4522	0.00014003
f__Thermosynechococcaceae	7.4729	7.21e-05	46.9549	0.0001357
f__Pleistophoridae	7.4669	7.204e-05	35953.3	0.103906
f__Neosynechococcaceae	7.4221	7.161e-05	46.7579	0.00013513
f__Candidatus_Aeolococcaceae	7.3311	7.073e-05	83.3422	0.00024086
f__Aggregaviridae	7.2539	6.999e-05	0	0
f__unclassified_p__Candidatus_Hermodarchaeota	7.2456	6.991e-05	1.0919	3.16e-06
f__Candidatus_Effluviviaceae	7.2125	6.959e-05	46.8548	0.00013541
f__unclassified_p__Candidatus_Hydrothermarchaeota	7.1937	6.941e-05	0	0
f__Ajellomycetaceae	7.1439	6.893e-05	59.3965	0.00017166
f__Hericiaceae	7.1401	6.889e-05	51.3367	0.00014836
f__Teloschistaceae	7.0894	6.84e-05	106.748	0.0003085
f__Lasiosphaeriaceae	7.0703	6.822e-05	30.6224	8.85e-05
f__Cafeteriaceae	7.053	6.805e-05	424.233	0.00122604
f__Tribonemataceae	7.0524	6.804e-05	109.612	0.00031678
f__Chitinivibrionaceae	7.0286	6.781e-05	39.1981	0.00011328
f__Eustigmataceae	7.0146	6.768e-05	0	0
f__Ceramiaceae	6.969	6.724e-05	369.7	0.00106844
f__Dientamoebidae	6.9619	6.717e-05	10.0528	2.905e-05
f__unclassified_p__Candidatus_Lindowiibacteriota	6.9281	6.684e-05	225.477	0.00065163
f__Minwuiaceae	6.7886	6.55e-05	1439.53	0.00416026
f__Paxillaceae	6.755	6.518e-05	21.3468	6.169e-05
f__Thiofilaceae	6.7258	6.489e-05	14.5631	4.209e-05
f__Stachybotryaceae	6.6912	6.456e-05	65.6203	0.00018964
f__Tricladiaceae	6.6396	6.406e-05	0	0
f__Plocamiaceae	6.6337	6.4e-05	24.1798	6.988e-05
f__unclassified_o__Christensenellales	6.6183	6.386e-05	511.881	0.00147935
f__unclassified_o__Pseudanabaenales	6.5832	6.352e-05	22.6508	6.546e-05
f__Caryophyllaceae	6.4978	6.269e-05	0	0
f__unclassified_o__Pleurocapsales	6.4976	6.269e-05	261.847	0.00075674
f__Helotiaceae	6.4883	6.26e-05	165.777	0.0004791
f__unclassified_c__Cyanophyceae	6.4373	6.211e-05	0	0
f__unclassified_c__Theionarchaea	6.4277	6.202e-05	193.422	0.00055899
f__Marseilleviridae	6.3965	6.172e-05	586.948	0.00169629
f__Peyssonneliaceae	6.3765	6.152e-05	0.7756	2.24e-06
f__Gregarinidae	6.3581	6.135e-05	43.654	0.00012616
f__Cyclonatronaceae	6.3537	6.13e-05	36.1339	0.00010443
f__unclassified_p__Candidatus_Yonathiibacteriota	6.3439	6.121e-05	3.3582	9.71e-06
f__Graphidaceae	6.327	6.105e-05	53.1428	0.00015358
f__unclassified_p__Candidatus_Brockarchaeota	6.312	6.09e-05	12.3772	3.577e-05
f__Aliterellaceae	6.3094	6.088e-05	24.5642	7.099e-05
f__Quaeritorhizaceae	6.2874	6.066e-05	650.474	0.00187988
f__unclassified_p__Candidatus_Vogeliibacteriota	6.2474	6.028e-05	37.6394	0.00010878
f__Pneumocystaceae	6.2433	6.024e-05	539.937	0.00156043
f__Serendipitaceae	6.2409	6.021e-05	81.322	0.00023502
f__Speluncibacteraceae	6.2294	6.01e-05	6.0232	1.741e-05
f__Rhodoligotrophaceae	6.1826	5.965e-05	813.299	0.00235045
f__unclassified_c__Glaucocystophyceae	6.1807	5.963e-05	0.7789	2.25e-06
f__Candidatus_Manganitrophaceae	6.1624	5.946e-05	333.13	0.00096275
f__Lipomycetaceae	6.1477	5.932e-05	155.69	0.00044995
f__Uronematidae	6.0804	5.867e-05	36.3417	0.00010503
f__Orthoherpesviridae	6.0498	5.837e-05	35.6932	0.00010315
f__unclassified_c__Sordariomycetes	6.0413	5.829e-05	194.788	0.00056294
f__Unikaryonidae	6.0396	5.827e-05	13775.5	0.0398116
f__Bryobacteraceae	6.0062	5.795e-05	395.666	0.00114348
f__unclassified_p__Candidatus_Abawacaibacteriota	5.9791	5.769e-05	25.2605	7.3e-05
f__Zymomonadaceae	5.9021	5.695e-05	44.6213	0.00012896
f__Desulfatirhabdiaceae	5.8965	5.689e-05	431.93	0.00124829
f__Thermithiobacillaceae	5.8534	5.648e-05	53.8578	0.00015565
f__unclassified_o__Conexivisphaerales	5.8182	5.614e-05	137.293	0.00039678
f__Salinivirgaceae	5.81	5.606e-05	150.248	0.00043422
f__Cladosporiaceae	5.772	5.569e-05	29.7463	8.597e-05
f__unclassified_o__Gloeobacterales	5.7664	5.564e-05	9.7078	2.806e-05
f__Backusellaceae	5.748	5.546e-05	736.364	0.00212811
f__unclassified_p__candidate_division_CPR2	5.7257	5.524e-05	9.0542	2.617e-05
f__Chaacviridae	5.6884	5.488e-05	10.2009	2.948e-05
f__Thyridiaceae	5.6794	5.48e-05	4.771	1.379e-05
f__Omphalotaceae	5.6306	5.433e-05	164.967	0.00047676
f__Thiohalobacteraceae	5.6306	5.433e-05	140.745	0.00040676
f__Meruliaceae	5.6292	5.431e-05	23.0154	6.652e-05
f__Cesiribacteraceae	5.5826	5.386e-05	276.593	0.00079936
f__Trigonopsidaceae	5.5745	5.378e-05	29.3271	8.476e-05
f__unclassified_c__Candidatus_Jordarchaeia	5.5595	5.364e-05	676.562	0.00195528
f__Astathelohaniidae	5.5451	5.35e-05	28794.8	0.0832175
f__Trichomonascaceae	5.5437	5.349e-05	279.659	0.00080822
f__Gloeobacteraceae	5.4306	5.24e-05	76.4524	0.00022095
f__unclassified_p__Candidatus_Harrisoniibacteriota	5.4106	5.22e-05	45.92	0.00013271
f__Scinaiaceae	5.4035	5.213e-05	0.7884	2.28e-06
f__Geoglossaceae	5.3822	5.193e-05	55.3573	0.00015998
f__Proschkiniaceae	5.3715	5.183e-05	0	0
f__Rubritaleaceae	5.3545	5.166e-05	819.07	0.00236713
f__Cryptosporidiidae	5.3422	5.154e-05	93.0383	0.00026888
f__Candidatus_Hepatoplasmataceae	5.3401	5.152e-05	247.299	0.0007147
f__Xylonaceae	5.316	5.129e-05	8.0738	2.333e-05
f__unclassified_p__Candidatus_Pyropristinus	5.3122	5.125e-05	0	0
f__Catenariaceae	5.2654	5.08e-05	49.4527	0.00014292
f__unclassified_d__Eukaryota	5.2649	5.08e-05	19.3968	5.606e-05
f__Borealophlyctidaceae	5.2616	5.077e-05	218.1	0.00063031
f__Pfiesteriaceae	5.2097	5.027e-05	7.5518	2.182e-05
f__Valsaceae	5.1968	5.014e-05	41.4874	0.0001199
f__Fomitopsidaceae	5.196	5.013e-05	95.0855	0.0002748
f__Candidatus_Epilineaceae	5.1734	4.991e-05	25.9666	7.504e-05
f__Dermateaceae	5.1517	4.971e-05	10.2158	2.952e-05
f__Candidatus_Nanopelagicaceae	5.0484	4.871e-05	234.545	0.00067784
f__Dugesiidae	5.0441	4.867e-05	0	0
f__Batrachospermaceae	5.0142	4.838e-05	12.2259	3.533e-05
f__Zobellviridae	5.0089	4.833e-05	2550.84	0.00737198
f__Nebulidae	4.9747	4.8e-05	17.9457	5.186e-05
f__Poxviridae	4.948	4.774e-05	124.239	0.00035905
f__unclassified_o__Caulobacterales	4.9363	4.763e-05	27.5463	7.961e-05
f__Globomycetaceae	4.8972	4.725e-05	220.844	0.00063824
f__Lachnocladiaceae	4.8748	4.703e-05	0	0
f__Wallemiaceae	4.8498	4.679e-05	27.279	7.884e-05
f__Tricholomataceae	4.8494	4.679e-05	64.6316	0.00018679
f__Ascoideaceae	4.8457	4.675e-05	230.1	0.00066499
f__Botryochloridaceae	4.8434	4.673e-05	0	0
f__Candidatus_Prometheoarchaeaceae	4.7709	4.603e-05	69.6745	0.00020136
f__Cylindrosympodiaceae	4.7637	4.596e-05	158.951	0.00045937
f__Oceanibaculaceae	4.7511	4.584e-05	2533	0.00732043
f__Phototrophicaceae	4.7377	4.571e-05	160.762	0.00046461
f__Mytilinidiaceae	4.7228	4.557e-05	0	0
f__Fragilariaceae	4.7083	4.543e-05	189.159	0.00054667
f__unclassified_p__Candidatus_Helarchaeota	4.7079	4.542e-05	118.569	0.00034267
f__Rhizodiscinaceae	4.6769	4.512e-05	8.7594	2.531e-05
f__Candidatus_Theseobacteraceae	4.6399	4.477e-05	45.3608	0.00013109
f__unclassified_o__Methanocellales	4.6136	4.451e-05	6.7834	1.96e-05
f__Pleomassariaceae	4.6078	4.446e-05	0	0
f__Hypoxylaceae	4.6032	4.441e-05	52.8791	0.00015282
f__unclassified_p__Candidatus_Kerfeldiibacteriota	4.5784	4.417e-05	106.18	0.00030686
f__unclassified_o__Monoblepharidales	4.5653	4.405e-05	217.754	0.00062931
f__Sigmoideomycetaceae	4.4783	4.321e-05	441.532	0.00127604
f__unclassified_p__Candidatus_Jacksoniibacteriota	4.4498	4.293e-05	0	0
f__Trichosporonaceae	4.4307	4.275e-05	106.632	0.00030817
f__unclassified_o__Mononegavirales	4.4301	4.274e-05	0	0
f__Rutstroemiaceae	4.4115	4.256e-05	10.928	3.158e-05
f__Phasianidae	4.4061	4.251e-05	0	0
f__Chaetomiaceae	4.3859	4.232e-05	588.353	0.00170035
f__Physalacriaceae	4.3526	4.2e-05	68.9725	0.00019933
f__Dacrymycetaceae	4.3425	4.19e-05	40.6543	0.00011749
f__unclassified_o__Nitrososphaerales	4.3417	4.189e-05	166.847	0.00048219
f__unclassified_c__Candidatus_Cloacimonadia	4.3322	4.18e-05	270.091	0.00078057
f__Ardenticatenaceae	4.3195	4.168e-05	142.754	0.00041256
f__Fluviibacteraceae	4.3094	4.158e-05	3.6693	1.06e-05
f__unclassified_p__Candidatus_Parvarchaeota	4.2972	4.146e-05	50.6435	0.00014636
f__unclassified_p__Candidatus_Komeiliibacteriota	4.2931	4.142e-05	86.7829	0.0002508
f__unclassified_p__Candidatus_Jorgensenbacteria	4.2885	4.138e-05	77.4412	0.00022381
f__Candidatus_Tharpellaceae	4.2269	4.078e-05	97.7989	0.00028264
f__Capsulimonadaceae	4.225	4.076e-05	24.3918	7.049e-05
f__Phaeocystidibacteraceae	4.2069	4.059e-05	230.44	0.00066598
f__unclassified_o__Halobacteriales	4.1788	4.032e-05	183.677	0.00053083
f__unclassified_p__Candidatus_Blackburniibacteriota	4.176	4.029e-05	22.7908	6.587e-05
f__Echinimonadaceae	4.168	4.021e-05	15.4739	4.472e-05
f__unclassified_o__Desulfurococcales	4.1515	4.006e-05	36.1825	0.00010457
f__Thelebolaceae	4.0989	3.955e-05	23.5751	6.813e-05
f__Candidatus_Bipolaricaulaceae	4.0832	3.94e-05	245.777	0.0007103
f__Trichocomaceae	4.0625	3.92e-05	123.241	0.00035617
f__Pectinidae	4.0588	3.916e-05	4.077	1.178e-05
f__Gonapodyaceae	4.0484	3.906e-05	499.033	0.00144222
f__Sargassaceae	4.0345	3.893e-05	8.0688	2.332e-05
f__Glaucosphaeraceae	3.9589	3.82e-05	0	0
f__Shiellaceae	3.8956	3.759e-05	185.312	0.00053555
f__Saccharomycodaceae	3.8511	3.716e-05	579.833	0.00167573
f__Pleurostomataceae	3.8421	3.707e-05	0	0
f__Cryphonectriaceae	3.8342	3.699e-05	7.9596	2.3e-05
f__Verrucariaceae	3.7953	3.662e-05	0	0
f__Trypetheliaceae	3.7731	3.64e-05	20.1401	5.821e-05
f__Skeletonemataceae	3.7567	3.625e-05	334.033	0.00096536
f__Letrouitiaceae	3.7374	3.606e-05	0	0
f__Penaeidae	3.721	3.59e-05	506.996	0.00146523
f__Candidatus_Asbonarchaeaceae	3.7115	3.581e-05	0	0
f__Hydnangiaceae	3.7109	3.58e-05	0	0
f__Pavlovaceae	3.6852	3.556e-05	200.742	0.00058015
f__Mytilidae	3.664	3.535e-05	0	0
f__Prochlorotrichaceae	3.631	3.503e-05	0	0
f__Haliotidae	3.6051	3.478e-05	6.1847	1.787e-05
f__Dipodascaceae	3.5723	3.447e-05	553.505	0.00159964
f__Leptodontidiaceae	3.5487	3.424e-05	0	0
f__Iodidimonadaceae	3.5394	3.415e-05	133.638	0.00038622
f__Russulaceae	3.5323	3.408e-05	119.886	0.00034647
f__Astraeaceae	3.5222	3.398e-05	0	0
f__Algiphilaceae	3.4331	3.312e-05	268.444	0.00077581
f__Blastocatellaceae	3.4169	3.297e-05	0	0
f__Gymnodiniaceae	3.4069	3.287e-05	0	0
f__Demerecviridae	3.3986	3.279e-05	5828.4	0.0168442
f__Geothermobacteraceae	3.3357	3.218e-05	213.394	0.00061671
f__Thermoflexibacteraceae	3.3103	3.194e-05	387.878	0.00112097
f__Pterocladiaceae	3.3059	3.19e-05	0.6631	1.92e-06
f__Balneicellaceae	3.2758	3.161e-05	114.947	0.0003322
f__unclassified_o__Streptosporangiales	3.2486	3.134e-05	27.3751	7.911e-05
f__Candidatus_Thalassarchaeaceae	3.2418	3.128e-05	0	0
f__unclassified_p__Atribacterota	3.2281	3.115e-05	9.8584	2.849e-05
f__Cyanidiaceae	3.1931	3.081e-05	131.452	0.0003799
f__Litorivicinaceae	3.1766	3.065e-05	260.481	0.0007528
f__Opalinidae	3.1522	3.041e-05	30.8338	8.911e-05
f__Candidatus_Minisyncoccaceae	3.1492	3.038e-05	0	0
f__unclassified_p__Ciliophora	3.1407	3.03e-05	0	0
f__Wrangeliaceae	3.1343	3.024e-05	0	0
f__Kangiellaceae	3.1103	3.001e-05	446.366	0.00129001
f__Candidatus_Dormibacteraceae	3.0279	2.921e-05	274.244	0.00079257
f__unclassified_p__Candidatus_Woykeibacteriota	3.0059	2.9e-05	0	0
f__Candidatus_Nanogingivalaceae	2.9713	2.867e-05	247.29	0.00071467
f__Abditibacteriaceae	2.95	2.846e-05	25.2146	7.287e-05
f__Candidatus_Subterrananammoxibiaceae	2.9425	2.839e-05	0.304	8.8e-07
f__Amphidomataceae	2.9395	2.836e-05	0	0
f__Govaniaceae	2.9105	2.808e-05	1210.63	0.00349876
f__Ceratocystidaceae	2.8926	2.791e-05	17.0183	4.918e-05
f__Endocladiaceae	2.8689	2.768e-05	0	0
f__unclassified_o__Candidatus_Pelagibacterales	2.8543	2.754e-05	105.022	0.00030352
f__Ramalinaceae	2.8475	2.747e-05	0	0
f__Acarosporaceae	2.8456	2.746e-05	0	0
f__Candidatus_Micrarchaeaceae	2.8369	2.737e-05	263.474	0.00076145
f__Dothioraceae	2.8183	2.719e-05	0	0
f__Mesyanzhinovviridae	2.8156	2.717e-05	139.638	0.00040356
f__Cyanothecaceae	2.8091	2.71e-05	113.083	0.00032681
f__Plakobranchidae	2.7932	2.695e-05	0	0
f__Morosphaeriaceae	2.7867	2.689e-05	0	0
f__unclassified_c__Megaviricetes	2.7505	2.654e-05	0	0
f__Mycotyphaceae	2.7477	2.651e-05	200.105	0.00057831
f__Candidatus_Nanosyncoccaceae	2.7429	2.646e-05	8.437	2.438e-05
f__Marasmiaceae	2.7243	2.629e-05	196.297	0.0005673
f__Suillaceae	2.6893	2.595e-05	99.5257	0.00028763
f__Bartheletiaceae	2.6821	2.588e-05	0	0
f__Ichneumonidae	2.6597	2.566e-05	29.5211	8.532e-05
f__Cortinariaceae	2.6538	2.56e-05	3643.13	0.0105287
f__Pyrinomonadaceae	2.6342	2.542e-05	237.673	0.00068688
f__Harpochytriaceae	2.6322	2.54e-05	0.7356	2.13e-06
f__unclassified_o__Helotiales	2.6185	2.526e-05	10.4571	3.022e-05
f__Brassicaceae	2.6063	2.515e-05	0.7858	2.27e-06
f__unclassified_p__Candidatus_Collierbacteria	2.6047	2.513e-05	121.86	0.00035218
f__Gnomoniaceae	2.5761	2.485e-05	0	0
f__Cyanophoraceae	2.5687	2.478e-05	164.122	0.00047432
f__Aestuariirhabdaceae	2.5571	2.467e-05	1.1083	3.2e-06
f__Vaucheriaceae	2.5538	2.464e-05	6.5394	1.89e-05
f__Schleiferiaceae	2.5367	2.448e-05	158.37	0.00045769
f__Pinaceae	2.5104	2.422e-05	11.6484	3.366e-05
f__Togniniaceae	2.4788	2.392e-05	0	0
f__unclassified_o__Candidatus_Hodarchaeales	2.4779	2.391e-05	152.171	0.00043978
f__Pyronemataceae	2.4532	2.367e-05	117.991	0.000341
f__Daphniidae	2.4427	2.357e-05	63.29	0.00018291
f__Andaluciidae	2.4411	2.355e-05	19.6031	5.665e-05
f__Laetiporaceae	2.4228	2.338e-05	9.051	2.616e-05
f__Lujinxingiaceae	2.3976	2.313e-05	63.1806	0.00018259
f__Jaapiaceae	2.3964	2.312e-05	0	0
f__Candidatus_Methanollivieraceae	2.389	2.305e-05	36.28	0.00010485
f__unclassified_p__Candidatus_Campbellbacteria	2.3681	2.285e-05	25.4488	7.355e-05
f__Choreocolacaceae	2.3661	2.283e-05	0	0
f__Methanonatronarchaeaceae	2.3647	2.282e-05	2.4127	6.97e-06
f__Kleczkowskaviridae	2.3156	2.234e-05	19.0794	5.514e-05
f__Cephalothecaceae	2.3127	2.231e-05	0	0
f__Candidatus_Deianiraeaceae	2.31	2.229e-05	23.2945	6.732e-05
f__Arachnomycetaceae	2.2663	2.187e-05	6.1923	1.79e-05
f__Hominidae	2.2652	2.186e-05	8.5092	2.459e-05
f__Candidatus_Gugararchaeaceae	2.2622	2.183e-05	0	0
f__unclassified_p__Candidatus_Terryibacteriota	2.2439	2.165e-05	3.7541	1.085e-05
f__Goniochloridaceae	2.1977	2.12e-05	0	0
f__Macrostomidae	2.173	2.097e-05	86.477	0.00024992
f__Aulographaceae	2.1708	2.094e-05	5.3464	1.545e-05
f__Chrysozymaceae	2.1457	2.07e-05	70.8239	0.00020468
f__Ketobacteraceae	2.135	2.06e-05	644.075	0.00186139
f__Kriegeriaceae	2.1249	2.05e-05	16.6709	4.818e-05
f__Kappamycetaceae	2.0964	2.023e-05	142.932	0.00041308
f__unclassified_p__Haptophyta	2.0937	2.02e-05	0	0
f__unclassified_o__Parmales	2.0925	2.019e-05	98.8506	0.00028568
f__Limidae	2.0803	2.007e-05	0	0
f__unclassified_c__Microbotryomycetes	2.0762	2.003e-05	0	0
f__Sporidiobolaceae	2.076	2.003e-05	369.379	0.00106751
f__Delitschiaceae	2.0686	1.996e-05	25.0668	7.244e-05
f__Pisolithaceae	1.9887	1.919e-05	17.5225	5.064e-05
f__Candidatus_Elulimicrobiaceae	1.9775	1.908e-05	37.3478	0.00010794
f__Schizotheciaceae	1.9675	1.898e-05	0	0
f__Candidatus_Culexmicrobiaceae	1.9646	1.895e-05	1.1002	3.18e-06
f__Forsetiviridae	1.9632	1.894e-05	16.6276	4.805e-05
f__Halococcaceae	1.91	1.843e-05	0	0
f__Ascodesmidaceae	1.9078	1.841e-05	15.2079	4.395e-05
f__Myxotrichaceae	1.8961	1.829e-05	7.7527	2.241e-05
f__unclassified_o__Nanoarchaeales	1.8552	1.79e-05	260.072	0.00075161
f__Lachnaceae	1.8463	1.781e-05	0	0
f__Candidatus_Asgardarchaeaceae	1.8335	1.769e-05	1088.33	0.0031453
f__Danionidae	1.8225	1.758e-05	136.529	0.00039457
f__Phaeodactylaceae	1.8104	1.747e-05	99.3204	0.00028704
f__unclassified_p__Candidatus_Beckwithbacteria	1.8014	1.738e-05	86.0207	0.0002486
f__Venturiaceae	1.7883	1.725e-05	13.6471	3.944e-05
f__Trapeliaceae	1.7577	1.696e-05	17.9386	5.184e-05
f__Babesiidae	1.7543	1.693e-05	176.442	0.00050992
f__Theraphosidae	1.7386	1.677e-05	23.6021	6.821e-05
f__Mrakiaceae	1.7231	1.663e-05	4.5103	1.303e-05
f__Malasseziaceae	1.7206	1.66e-05	151.127	0.00043676
f__unclassified_c__Leotiomycetes	1.701	1.641e-05	4.1408	1.197e-05
f__unclassified_c__Candidatus_Nanohaloarchaea	1.6923	1.633e-05	15.4057	4.452e-05
f__Physciaceae	1.6829	1.624e-05	10.3003	2.977e-05
f__Thioalkalibacteraceae	1.6659	1.607e-05	224.227	0.00064802
f__unclassified_c__Echinamoebida	1.6427	1.585e-05	0	0
f__Didymiaceae	1.6413	1.584e-05	0	0
f__Gloeophyllaceae	1.6401	1.582e-05	14.1231	4.082e-05
f__Funariaceae	1.5999	1.544e-05	0	0
f__Boletaceae	1.5785	1.523e-05	52.5643	0.00015191
f__Abyssicoccaceae	1.5766	1.521e-05	199.036	0.00057522
f__Amoebophryaceae	1.5726	1.517e-05	142.995	0.00041326
f__Jakobidae	1.5359	1.482e-05	63.7148	0.00018414
f__Lobariaceae	1.5314	1.478e-05	0	0
f__Gomphaceae	1.5226	1.469e-05	40.0163	0.00011565
f__Gautieriaceae	1.5208	1.467e-05	11.2207	3.243e-05
f__Persicobacteraceae	1.5136	1.46e-05	1036.8	0.00299637
f__Hydnaceae	1.495	1.442e-05	40.1038	0.0001159
f__Thermogemmatisporaceae	1.4896	1.437e-05	85.9361	0.00024836
f__unclassified_c__Variosea	1.4586	1.407e-05	0	0
f__Microascaceae	1.4566	1.405e-05	43.5686	0.00012591
f__Paratrimastigidae	1.4552	1.404e-05	123.977	0.0003583
f__Sporastatiaceae	1.4156	1.366e-05	10.211	2.951e-05
f__unclassified_p__Halobacteriota	1.4026	1.353e-05	726.71	0.00210021
f__Argynnaceae	1.3982	1.349e-05	0	0
f__Radiomycetaceae	1.377	1.329e-05	183.704	0.00053091
f__Solieriaceae	1.3674	1.319e-05	0	0
f__unclassified_o__Sordariales	1.3646	1.317e-05	62.5009	0.00018063
f__unclassified_o__Endomicrobiales	1.3464	1.299e-05	32.4761	9.386e-05
f__Vezdaeaceae	1.3452	1.298e-05	0	0
f__Botryobasidiaceae	1.3215	1.275e-05	36.0606	0.00010422
f__Pyrsonymphidae	1.2827	1.238e-05	0	0
f__Neolectaceae	1.2195	1.177e-05	53.2125	0.00015379
f__Lecudinidae	1.205	1.163e-05	20.37	5.887e-05
f__Eunotiaceae	1.2003	1.158e-05	62.5352	0.00018073
f__unclassified_o__Russulales	1.1999	1.158e-05	0	0
f__Melampsoraceae	1.1622	1.121e-05	25.2041	7.284e-05
f__Syncephalastraceae	1.1378	1.098e-05	65.6233	0.00018965
f__Cyprinidae	1.1364	1.096e-05	47.0244	0.0001359
f__Acrospermaceae	1.0917	1.053e-05	12.9929	3.755e-05
f__Diatrypaceae	1.0718	1.034e-05	6.0065	1.736e-05
f__Hymenogastraceae	1.0718	1.034e-05	10.6208	3.069e-05
f__Arthrodermataceae	1.0462	1.009e-05	52.3526	0.0001513
f__Discinellaceae	1.0298	9.94e-06	20.9516	6.055e-05
f__unclassified_o__Ortervirales	1.0296	9.93e-06	44.4463	0.00012845
f__Pyrenochaetopsidaceae	0.993	9.58e-06	0	0
f__unclassified_k__Heunggongvirae	0.9924	9.57e-06	169.017	0.00048846
f__Theileriidae	0.9912	9.56e-06	340.335	0.00098358
f__unclassified_p__Candidatus_Ryaniibacteriota	0.9086	8.77e-06	351.166	0.00101488
f__Thermoproteaceae	0.9079	8.76e-06	52.5139	0.00015177
f__unclassified_o__Chaetothyriales	0.9072	8.75e-06	25.9449	7.498e-05
f__Irpicaceae	0.9044	8.73e-06	18.1375	5.242e-05
f__Candidatus_Zymogenaceae	0.8948	8.63e-06	8.3374	2.41e-05
f__unclassified_o__Pavlovales	0.8937	8.62e-06	190.185	0.00054964
f__Futianiaceae	0.848	8.18e-06	610.347	0.00176392
f__Candidatus_Saccharicenantaceae	0.8444	8.15e-06	36.2572	0.00010478
f__Candidatus_Bathyarchaeaceae	0.7728	7.46e-06	53.8573	0.00015565
f__Protomycetaceae	0.7576	7.31e-06	30.0285	8.678e-05
f__Capnodiaceae	0.7354	7.1e-06	4.9637	1.435e-05
f__Epitheliaceae	0.7145	6.89e-06	17.4325	5.038e-05
f__Borreliaceae	0.71	6.85e-06	72.4486	0.00020938
f__Kiritimatiellaceae	0.6909	6.67e-06	56.0718	0.00016205
f__Pertusariaceae	0.6909	6.67e-06	14.758	4.265e-05
f__Cheloniidae	0.6514	6.28e-06	0	0
f__unclassified_o__Candidatus_Mcinerneyibacteriales	0.6277	6.06e-06	16.5013	4.769e-05
f__Coniochaetaceae	0.6246	6.03e-06	29.3436	8.48e-05
f__Chrysotrichaceae	0.5782	5.58e-06	19.0022	5.492e-05
f__unclassified_c__Candidatus_Poseidoniia	0.544	5.25e-06	185.447	0.00053594
f__Proteromonadidae	0.5278	5.09e-06	23.4904	6.789e-05
f__Vulgatibacteraceae	0.4967	4.79e-06	121.144	0.00035011
f__Nairoviridae	0.4776	4.61e-06	36.0096	0.00010407
f__Kytococcaceae	0.4733	4.57e-06	26.8098	7.748e-05
f__Endictyaceae	0.3978	3.84e-06	19.1692	5.54e-05
f__Thermostichaceae	0.3865	3.73e-06	9.7041	2.804e-05
f__Candidatus_Actinomarinaceae	0.3438	3.32e-06	367.646	0.0010625
f__Stephanopyxidaceae	0.2907	2.81e-06	175.559	0.00050737
f__unclassified_o__Candidatus_Alkanophagales	0.2826	2.73e-06	39.5613	0.00011433
f__Apiosporaceae	0.2712	2.62e-06	48.5603	0.00014034
f__Nautiliaceae	0.271	2.61e-06	201.882	0.00058344
f__Natronospirillaceae	0.2465	2.38e-06	36.6257	0.00010585
f__Stauroneidaceae	0.2184	2.11e-06	182.147	0.00052641
f__Diploneidaceae	0.194	1.87e-06	16.8286	4.863e-05
f__Paraliaceae	0.1771	1.71e-06	665.911	0.0019245
f__Cymatolegaceae	0.1075	1.04e-06	21.0778	6.092e-05
f__Gomphonemataceae	0.0933	9e-07	108.7	0.00031415
f__Chromeraceae	0	0	7.1477	2.066e-05
f__unclassified_o__Nephromycida	0	0	32.46	9.381e-05
f__Ceraceosoraceae	0	0	19.224	5.556e-05
f__Perlucidibacaceae	0	0	21.785	6.296e-05
f__Plagiogrammaceae	0	0	25.3786	7.334e-05
f__Stereocaulaceae	0	0	6.6062	1.909e-05
f__Candidatus_Methylarchaceae	0	0	13.5824	3.925e-05
f__Cercomonadidae	0	0	12.6508	3.656e-05
f__Candidatus_Methanospirareceae	0	0	15.9751	4.617e-05
f__unclassified_o__Euglenales	0	0	5.2614	1.521e-05
f__Piedraiaceae	0	0	11.799	3.41e-05
f__Cirrosporiaceae	0	0	3.4632	1.001e-05
f__Cionidae	0	0	2.5258	7.3e-06
f__Pilobolaceae	0	0	27.5248	7.955e-05
f__Candidatus_Nitrosocaldaceae	0	0	16.4999	4.769e-05
f__unclassified_o__Naviculales	0	0	175.476	0.00050713
f__Candidatus_Odinarchaeaceae	0	0	2.4468	7.07e-06
f__Candidatus_Paceibacteraceae	0	0	9.6558	2.791e-05
f__unclassified_o__Methanococcales	0	0	70.2912	0.00020314
f__unclassified_o__Hypocreales	0	0	17.1965	4.97e-05
f__unclassified_o__Gloeomargaritales	0	0	10.2177	2.953e-05
f__Phaeotrichaceae	0	0	8.9346	2.582e-05
f__Candidatus_Electryoneaceae	0	0	47.3411	0.00013682
f__Odontellaceae	0	0	0.5829	1.68e-06
f__Opisthorchiidae	0	0	17.4617	5.046e-05
f__Taphrinaceae	0	0	17.2753	4.993e-05
f__Tenebrionidae	0	0	156.47	0.0004522
f__unclassified_o__Microstromatales	0	0	20.8293	6.02e-05
f__Chitinispirillaceae	0	0	37.9004	0.00010953
f__Chaseviridae	0	0	1.3343	3.86e-06
f__Parmeliaceae	0	0	10.574	3.056e-05
f__unclassified_o__Oceanospirillales	0	0	2.667	7.71e-06
f__Stygiellidae	0	0	7.6039	2.198e-05
f__Chaetosphaeriaceae	0	0	21.6575	6.259e-05
f__unclassified_o__Sarrameanales	0	0	16.6355	4.808e-05
f__Phakopsoraceae	0	0	2.1023	6.08e-06
f__Philasteridae	0	0	11.3096	3.269e-05
f__Physaraceae	0	0	18.5506	5.361e-05
f__Celerinatantimonadaceae	0	0	0.5755	1.66e-06
f__Caulochytriaceae	0	0	53.9931	0.00015604
f__Thelephoraceae	0	0	61.2791	0.0001771
f__Cymatosiraceae	0	0	0.703	2.03e-06
f__Natronospiraceae	0	0	0	0
f__Oceanipulchritudinaceae	0	0	58.5627	0.00016925
f__unclassified_o__Puniceicoccales	0	0	49.2383	0.0001423
f__Cycadaceae	0	0	95.6562	0.00027645
f__unclassified_o__Candidatus_Thermoprofundales	0	0	54.5751	0.00015772
f__unclassified_o__Candidatus_Spechtbacterales	0	0	0	0
f__unclassified_o__Onygenales	0	0	12.77	3.691e-05
f__Pleuroascaceae	0	0	13.0303	3.766e-05
f__Amoebidiaceae	0	0	31.1756	9.01e-05
f__Candidatus_Cenarchaeaceae	0	0	17.9349	5.183e-05
f__Pteromalidae	0	0	6.4301	1.858e-05
f__Pterocladiophilaceae	0	0	29.6988	8.583e-05
f__Planorbidae	0	0	14.4168	4.166e-05
f__Stereaceae	0	0	8.194	2.368e-05
f__Stephanoecidae	0	0	6.5375	1.889e-05
f__Chrysogorgiidae	0	0	83.0084	0.0002399
f__Ferroplasmaceae	0	0	17.8082	5.147e-05
f__unclassified_c__Candidatus_Micrarchaeia	0	0	20.611	5.957e-05
f__Halothecacae	0	0	6.5301	1.887e-05
f__Halorubellaceae	0	0	58.6206	0.00016941
f__Halobacteriaceae	0	0	8.5958	2.484e-05
f__Ichthyobacteriaceae	0	0	213.543	0.00061714
f__Ventosimonadaceae	0	0	12.0891	3.494e-05
f__Leptocylindraceae	0	0	44.3348	0.00012813
f__Amorphothecaceae	0	0	363.436	0.00105034
f__unclassified_p__Candidatus_Fraseribacteriota	0	0	8.0272	2.32e-05
f__unclassified_p__Candidatus_Chisholmiibacteriota	0	0	22.5637	6.521e-05
f__Candidatus_Alcyoniellaceae	0	0	6.7345	1.946e-05
f__Candidatus_Afararchaeaceae	0	0	32.4661	9.383e-05
f__Candidatus_Absconditicoccaceae	0	0	72.6452	0.00020995
f__Buthidae	0	0	24.9476	7.21e-05
f__Bolbitiaceae	0	0	14.4324	4.171e-05
f__Bodonidae	0	0	22.781	6.584e-05
f__Pleurosigmataceae	0	0	112.379	0.00032478
f__unclassified_p__Candidatus_Kuenenbacteria	0	0	34.8614	0.00010075
f__Candidatus_Brachytrichaceae	0	0	45.7817	0.00013231
f__Candidatus_Borrarchaeaceae	0	0	15.0283	4.343e-05
f__unclassified_p__Candidatus_Gerdarchaeota	0	0	17.381	5.023e-05
f__Steccherinaceae	0	0	9.4049	2.718e-05
f__Staurosiraceae	0	0	10.1078	2.921e-05
f__Phaeomoniellaceae	0	0	4.3583	1.26e-05
f__Pootjesviridae	0	0	36.4724	0.00010541
f__Podoscyphaceae	0	0	23.9789	6.93e-05
f__Berkeleyaceae	0	0	60.7605	0.0001756
f__Pterulaceae	0	0	12.1004	3.497e-05
f__Candidatus_Mycalebacteriaceae	0	0	43.0657	0.00012446
f__Candidatus_Mnemosynellaceae	0	0	12.6089	3.644e-05
f__unclassified_p__Candidatus_Blackallbacteria	0	0	48.6167	0.0001405
f__unclassified_o__Trechisporales	0	0	24.5385	7.092e-05
f__Candidatus_Polarisedimenticolaceae	0	0	42.8205	0.00012375
f__Candidatus_Haiyanarchaeaceae	0	0	5.9626	1.723e-05
f__Peridiniaceae	0	0	7.3042	2.111e-05
f__Galaxauraceae	0	0	15.3675	4.441e-05
f__Psittacicellaceae	0	0	9.8893	2.858e-05
f__Pseudomassariaceae	0	0	4.4591	1.289e-05
f__Rhizosoleniaceae	0	0	61.5405	0.00017785
f__Spragueidae	0	0	42699.7	0.123403
f__Picrophilaceae	0	0	21.856	6.316e-05
f__Peduoviridae	0	0	0.8542	2.47e-06
f__Syndiniaceae	0	0	51.5113	0.00014887
f__Suidae	0	0	17.147	4.956e-05
f__Peniophoraceae	0	0	13.2733	3.836e-05
f__unclassified_c__Candidatus_Methanomethylicia	0	0	119.993	0.00034678
f__unclassified_c__Candidatus_Lokiarchaeia	0	0	477.517	0.00138003
f__Zythiaceae	0	0	8.1224	2.347e-05
f__Flaviviridae	0	0	23.0392	6.658e-05
f__Fistulinaceae	0	0	12.9929	3.755e-05
f__Violaceomycetaceae	0	0	79.4253	0.00022954
f__Gomphidiaceae	0	0	16.5506	4.783e-05
f__Glugeidae	0	0	2.2913	6.62e-06
f__Punctulariaceae	0	0	7.0504	2.038e-05
f__Lessoniaceae	0	0	0.5583	1.61e-06
f__Atheliaceae	0	0	49.4315	0.00014286
f__Guelinviridae	0	0	52192.2	0.150837
f__Grimontviridae	0	0	879.163	0.0025408
f__Grifolaceae	0	0	19.8449	5.735e-05
f__Glaucocystaceae	0	0	41.6101	0.00012025
f__Hemiaulaceae	0	0	17.2239	4.978e-05
f__Hamatocanthoscyphaceae	0	0	13.6112	3.934e-05
f__Waddliaceae	0	0	72.7863	0.00021035
f__Isochrysidaceae	0	0	15.7378	4.548e-05
f__Candidatus_Anaeroferrophillacea	0	0	8.8036	2.544e-05
f__Candidatus_Altarchaeaceae	0	0	8.6733	2.507e-05
f__Candidatus_Jingweiarchaeaceae	0	0	2.613	7.55e-06
f__Candidatus_Culexarchaeaceae	0	0	4.9908	1.442e-05
f__unclassified_p__Candidatus_Niyogiibacteriota	0	0	15.5385	4.491e-05
f__unclassified_p__Candidatus_Nezhaarchaeota	0	0	13.2446	3.828e-05
f__Anaerobacaceae	0	0	10.2907	2.974e-05
f__Amphipleuraceae	0	0	21.8481	6.314e-05
f__Chuviridae	0	0	421.769	0.00121892
f__Schitoviridae	0	0	4968.9	0.0143602
f__unclassified_p__candidate_division_LCP-89	0	0	139.879	0.00040425
f__Acanthocerataceae	0	0	6.7021	1.937e-05
f__Segniliparaceae	0	0	67.0165	0.00019368
f__Adenoviridae	0	0	729.949	0.00210957
f__Adinetidae	0	0	5.1348	1.484e-05
f__unclassified_p__Candidatus_Wirthbacteria	0	0	45.869	0.00013256
f__Ahnfeltiaceae	0	0	18.2497	5.274e-05
f__Amphiacanthidae	0	0	183.953	0.00053163
f__Eremomycetaceae	0	0	4.8957	1.415e-05
f__unclassified_c__Methanococci	0	0	3.5284	1.02e-05
f__unclassified_c__Kinetoplastea	0	0	12.0467	3.482e-05
f__Hypneaceae	0	0	8.1484	2.355e-05
f__Hoehnelomycetaceae	0	0	47.3939	0.00013697
f__Lithodesmiaceae	0	0	56.272	0.00016263
f__Lineolataceae	0	0	12.7561	3.687e-05
f__Lichinaceae	0	0	10.3092	2.979e-05
f__Candidatus_Anoxymicrobiaceae	0	0	20.2466	5.851e-05
f__Metaviridae	0	0	13.8434	4.001e-05
f__Formicidae	0	0	32.69	9.447e-05
f__Forficulidae	0	0	1.9645	5.68e-06
f__Exobasidiaceae	0	0	187.338	0.00054141
f__Exidiaceae	0	0	118.181	0.00034155
f__Jonesiaceae	0	0	33.866	9.787e-05
f__Trimorphomycetaceae	0	0	2.7491	7.94e-06
f__Braconidae	0	0	294.49	0.00085108
f__Leucosporidiaceae	0	0	58.1496	0.00016805
f__unclassified_p__Verrucomicrobiota	0	0	225.975	0.00065307
f__unclassified_p__Nucleocytoviricota	0	0	34.6804	0.00010023
f__Rosaceae	0	0	6.2699	1.812e-05
f__Figitidae	0	0	12.949	3.742e-05
f__Candidatus_Chloroheliaceae	0	0	26.4158	7.634e-05
f__unclassified_p__Candidatus_Spechtiibacteriota	0	0	7.298	2.109e-05
f__Gyrodontaceae	0	0	5.8588	1.693e-05
f__unclassified_p__Candidatus_Geothermarchaeota	0	0	7.855	2.27e-05
f__Ascobolaceae	0	0	19.5769	5.658e-05
f__Hepadnaviridae	0	0	2.1561	6.23e-06
f__Hemiselmidaceae	0	0	12.1273	3.505e-05
f__Rountreeviridae	0	0	0	0
f__Pyrodictiaceae	0	0	55.5493	0.00016054
f__Rhabdoviridae	0	0	3.3798	9.77e-06
f__Rarobacteraceae	0	0	59.6127	0.00017228
f__Ramicandelaberaceae	0	0	97.7708	0.00028256
f__Aplosporellaceae	0	0	27.03	7.812e-05
f__Veneridae	0	0	5.86	1.694e-05
f__Ascidiidae	0	0	33.4535	9.668e-05
f__Anthocerotibacteraceae	0	0	24.9272	7.204e-05
f__Romeriaceae	0	0	4.4848	1.296e-05
f__Rickenellaceae	0	0	9.105	2.631e-05
f__Rhynchogastremaceae	0	0	9.4049	2.718e-05
f__Rhodothalassiaceae	0	0	102.407	0.00029596
f__Acidilobaceae	0	0	9.8964	2.86e-05
f__Acrididae	0	0	19.7484	5.707e-05
f__Salicaceae	0	0	49.5362	0.00014316
f__Ascoviridae	0	0	20.2158	5.842e-05
f__unclassified_p__Candidatus_Methanomethylicota	0	0	16.5191	4.774e-05
f__unclassified_p__Candidatus_Mcinerneyibacteriota	0	0	1.3182	3.81e-06
f__Anaulaceae	0	0	18.0424	5.214e-05
f__Auriscalpiaceae	0	0	20.8004	6.011e-05
f__Aulacoseiraceae	0	0	7.5001	2.168e-05
f__Attheyaceae	0	0	3.1457	9.09e-06
f__Sanyastnellaceae	0	0	177.63	0.00051336
f__Salmonidae	0	0	81.6513	0.00023597
f__Schizoporaceae	0	0	26.0649	7.533e-05
f__unclassified_o__Candidatus_Hecatellales	0	0	6.2271	1.8e-05
f__unclassified_o__Candidatus_Fermentibacterales	0	0	1.7574	5.08e-06
f__unclassified_o__Dictyosteliales	0	0	13.8857	4.013e-05
f__unclassified_o__Dermocystida	0	0	27.5566	7.964e-05
f__unclassified_o__Cytophagales	0	0	86.0858	0.00024879
f__unclassified_o__Cyphobasidiales	0	0	33.7148	9.744e-05
f__Melanogastraceae	0	0	17.0183	4.918e-05
f__Pachyviridae	0	0	31.7359	9.172e-05
f__Erythrotrichiaceae	0	0	12.3722	3.576e-05
f__Orlajensenviridae	0	0	1.3506	3.9e-06
f__Ordosporidae	0	0	4788.44	0.0138387
f__Phaeolaceae	0	0	9.4858	2.741e-05
f__Nudiviridae	0	0	214.771	0.00062069
f__Nucleariidae	0	0	35.5317	0.00010269
f__unclassified_o__Candidatus_Proteinoplasmatales	0	0	30.9024	8.931e-05
f__Myriangiaceae	0	0	3.1909	9.22e-06
f__Thermoanaerobaculaceae	0	0	20.2761	5.86e-05
f__Pachysolenaceae	0	0	135.485	0.00039156
f__Chlorociboriaceae	0	0	81.9356	0.0002368
f__Crepidotaceae	0	0	1.3807	3.99e-06
f__unclassified_o__Entylomatales	0	0	24.4453	7.065e-05
f__unclassified_o__Enterobacterales	0	0	1.492	4.31e-06
f__unclassified_o__Dothideales	0	0	8.7877	2.54e-05
f__Clathraceae	0	0	7.6632	2.215e-05
f__Cantharellaceae	0	0	27.5953	7.975e-05
f__Candidatus_Tritonobacteraceae	0	0	19.3471	5.591e-05
f__Parvicellaceae	0	0	13.6532	3.946e-05
f__Candidatus_Tariuqbacteraceae	0	0	10.0992	2.919e-05
f__Coscinodiscaceae	0	0	19.9653	5.77e-05
f__Coniophoraceae	0	0	3.5159	1.016e-05
f__Coniocybaceae	0	0	65.8369	0.00019027
f__Coleosporiaceae	0	0	13.7705	3.98e-05
f__Clitocybaceae	0	0	14.7413	4.26e-05
f__unclassified_o__Dipodascales	0	0	73.9005	0.00021357
f__Patellariaceae	0	0	22.2435	6.428e-05
f__Candidatus_Thermochlorobacteriaceae	0	0	13.2493	3.829e-05
f__Nidulariaceae	0	0	20.1237	5.816e-05
f__Neomegalonemataceae	0	0	669.55	0.00193501
f__Elsinoaceae	0	0	508.591	0.00146984
f__unclassified_c__Nitrospiria	0	0	57.3483	0.00016574
f__Tilletiariaceae	0	0	263.073	0.00076029
f__Tichowtungiaceae	0	0	131.742	0.00038074
f__Thoracosphaeraceae	0	0	5.5327	1.599e-05
f__Thiohalospiraceae	0	0	17.4914	5.055e-05
f__Microvenatoraceae	0	0	39.7242	0.0001148
f__unclassified_c__Elusimicrobia	0	0	13.3523	3.859e-05
f__Drexlerviridae	0	0	108.084	0.00031237
f__Drepanopezizaceae	0	0	13.8063	3.99e-05
f__Dissulfurispiraceae	0	0	21.0968	6.097e-05
f__unclassified_c__Naldaviricetes	0	0	1.1845	3.42e-06
f__Thermotomaculaceae	0	0	20.89	6.037e-05
f__Lymnaeidae	0	0	6.2928	1.819e-05
f__Luteibaculaceae	0	0	66.6434	0.0001926
f__Thiohalorhabdaceae	0	0	64.3566	0.00018599
f__Mesoaciditogaceae	0	0	272.966	0.00078888
f__unclassified_k__Fungi	0	0	22.8266	6.597e-05
f__Cyanidioschyzonaceae	0	0	12.9302	3.737e-05
f__Culicosporidae	0	0	9113.31	0.0263377
f__Cucurbitaceae	0	0	7.8374	2.265e-05
f__Cryptomonadaceae	0	0	10.239	2.959e-05
f__Crypthecodiniaceae	0	0	5.7064	1.649e-05
f__Entomoneidaceae	0	0	166.143	0.00048016
f__Mixiaceae	0	0	25.0996	7.254e-05
f__Naemateliaceae	0	0	7.9177	2.288e-05
f__Cryomorphaceae	0	0	78.1394	0.00022582
f__unclassified_o__Auriculariales	0	0	8.0311	2.321e-05
f__unclassified_o__Anaerolineales	0	0	59.5361	0.00017206
f__unclassified_o__Agaricales	0	0	15.3629	4.44e-05
f__Lavidaviridae	0	0	36.6108	0.00010581
f__Kryptoperidiniaceae	0	0	1.7165	4.96e-06
f__Muridae	0	0	16.8976	4.883e-05
f__Molycolviridae	0	0	9.0365	2.612e-05
f__Methylohalomonadaceae	0	0	46.5227	0.00013445
Total Classified (Sum)	1.03645e+07	100	3.46018e+07	100

## Sheet: Genus
Genus	FM_RPKM_Value	FM_Ratio (%)	FC_RPKM_Value	FC_Ratio (%)
g__Clostridium	683906	6.59858	2.95724e+06	8.54648
g__Methanobrevibacter	476572	4.59814	120808	0.349138
g__Anaerorhabdus	460615	4.44418	847879	2.45039
g__unclassified_p__Bacillota	361013	3.48319	77470.4	0.223891
g__Desulfovibrio	339342	3.2741	1.23089e+06	3.5573
g__Kineothrix	228427	2.20395	88854	0.25679
g__Lachnoclostridium	226895	2.18916	127045	0.367162
g__Bilophila	184367	1.77884	604698	1.74759
g__unclassified_f__Erysipelotrichaceae	177608	1.71363	253005	0.731189
g__Hungatella	175270	1.69107	94201.2	0.272244
g__Thomasclavelia	143590	1.3854	294084	0.849909
g__Bacteroides	142769	1.37749	861079	2.48854
g__unclassified_c__Caudoviricetes	132440	1.27783	1.04714e+06	3.02625
g__Anaerotruncus	129076	1.24538	209212	0.604626
g__Hafnia	123107	1.18778	833.449	0.00240869
g__Blautia	122048	1.17757	145548	0.420636
g__Ruthenibacterium	120838	1.16589	245014	0.708096
g__Enterocloster	113448	1.09459	57514.5	0.166218
g__Eubacterium	112472	1.08517	234396	0.677409
g__Faecalicatena	108009	1.04211	95705	0.276589
g__Hydrogenoanaerobacterium	107373	1.03598	90005.1	0.260117
g__Eisenbergiella	102510	0.989052	70214.5	0.202921
g__Amedibacterium	101176	0.97618	171796	0.496495
g__Ruminococcus	97000	0.935891	298991	0.864091
g__Dorea	96950	0.935409	87541.3	0.252996
g__Amedibacillus	89676.3	0.86523	139043	0.401838
g__Pseudoflavonifractor	87356.5	0.842847	89148.1	0.25764
g__Akkermansia	84545.6	0.815727	83115.9	0.240207
g__Lacrimispora	80181.4	0.773619	58603.6	0.169366
g__Oscillibacter	78781	0.760107	126990	0.367004
g__Parabacteroides	74900.1	0.722663	259321	0.749444
g__Longicatena	74123.5	0.71517	152421	0.440499
g__Coprobacillus	72836.8	0.702756	237596	0.686657
g__Intestinimonas	71007.9	0.685109	61319.3	0.177214
g__Mucispirillum	67157.7	0.647962	52262.8	0.15104
g__Nocardioides	67068.6	0.647103	109964	0.317798
g__Angelakisella	66779.1	0.644309	86922.3	0.251207
g__Roseburia	64636	0.623632	69445.2	0.200698
g__Acetatifactor	63040.1	0.608234	64449.6	0.186261
g__unclassified_f__Nitrososphaeraceae	60119.7	0.580057	389266	1.12499
g__Anaerotignum	58261.1	0.562124	208756	0.60331
g__Christensenella	55066.8	0.531305	448480	1.29612
g__Paludihabitans	54613.8	0.526934	93253.9	0.269506
g__Anaerocolumna	54578.8	0.526596	62997.5	0.182064
g__Candidatus_Stoquefichus	53795	0.519033	154780	0.447317
g__unclassified_f__Methanobacteriaceae	51301	0.49497	4431.83	0.0128081
g__Mailhella	49638.2	0.478927	214562	0.620088
g__Mediterraneibacter	47214.5	0.455543	48153.9	0.139166
g__Robinsoniella	47010.6	0.453576	37013.6	0.10697
g__Treponema	46758	0.451138	119805	0.346238
g__Paenibacillus	46676.8	0.450355	87491.5	0.252852
g__Copranaerobaculum	46609.5	0.449706	118821	0.343394
g__Flavonifractor	43609.1	0.420756	60518.9	0.174901
g__Extibacter	42433.4	0.409413	27620.3	0.0798232
g__Ligaoa	40582.1	0.391551	17740.8	0.0512713
g__Enterococcus	40461.5	0.390387	59567.1	0.17215
g__Nitratidesulfovibrio	39111.2	0.37736	136134	0.393431
g__Beduini	37740.3	0.364132	38916.7	0.11247
g__Breznakia	37325.1	0.360126	1.66731e+06	4.81856
g__Candidatus_Methanorudis	36057.7	0.347898	1027.58	0.00296973
g__Methanobacterium	35656.5	0.344027	3141.88	0.00908011
g__Candidatus_Methanobinarius	34732.1	0.335108	103996	0.30055
g__Aminipila	34507.4	0.33294	53181.6	0.153696
g__Candidatus_Avidesulfovibrio	33717	0.325314	169829	0.490811
g__Velocimicrobium	33090	0.319264	4940.16	0.0142772
g__Agathobaculum	32805.9	0.316524	25067.5	0.0724455
g__Lawsonibacter	30045.2	0.289887	28650	0.0827991
g__Ruminiclostridium	29696.6	0.286523	116071	0.335447
g__Butyricicoccus	29314.7	0.282839	44628.4	0.128977
g__Neglectibacter	28777	0.277651	74156.7	0.214315
g__Longibaculum	28686.3	0.276776	127430	0.368274
g__Clostridioides	28608.8	0.276028	90885.1	0.26266
g__Obesumbacterium	26546.1	0.256126	151.19	0.00043694
g__Acutalibacter	26072.7	0.251559	59555	0.172115
g__Acetivibrio	25545.1	0.246468	57687.7	0.166719
g__Sedimentibacter	24881.3	0.240064	69588.6	0.201112
g__Gemmiger	24401.8	0.235437	41951.7	0.121241
g__Pygmaiobacter	23974.9	0.231319	54599.2	0.157793
g__Bacillus	23397	0.225743	82621.9	0.238779
g__Gordonibacter	23388.5	0.225661	67163.2	0.194103
g__Anaerosporobacter	23020.7	0.222112	37112.6	0.107256
g__Holdemania	22931.9	0.221255	177360	0.512575
g__Subdoligranulum	22898.7	0.220935	44165.3	0.127639
g__Escherichia	22394.7	0.216072	22285	0.0644041
g__Candidatus_Fimivivens	22157.6	0.213785	72686.1	0.210064
g__Anaerovorax	21187.6	0.204425	46847.3	0.13539
g__Caproiciproducens	21178.6	0.204339	34342.7	0.0992511
g__Anaeromassilibacillus	21087	0.203455	56233	0.162515
g__Provencibacterium	21026.2	0.202868	63934.6	0.184772
g__Marasmitruncus	20840.7	0.201078	40328.5	0.11655
g__Dielma	20408.5	0.196908	107680	0.311198
g__Anaerostipes	20217.1	0.195062	28794.9	0.083218
g__Microbacterium	19210.9	0.185354	35710.9	0.103205
g__Evtepia	19202.3	0.185271	32464	0.0938217
g__Anaerofilum	19191.7	0.185169	37891.3	0.109507
g__Fournierella	19039.7	0.183702	35116.9	0.101489
g__Hespellia	18987.6	0.183199	19795.5	0.0572094
g__Candidatus_Methanovirga	18921.3	0.18256	401.6	0.00116063
g__Coprococcus	18861	0.181978	20033.9	0.0578984
g__Tyzzerella	18681.5	0.180246	21418.3	0.0618992
g__Butyrivibrio	17643.2	0.170228	22549.9	0.0651696
g__Merdimmobilis	17522.4	0.169062	34338.9	0.0992401
g__Herbinix	17411.6	0.167993	28272.5	0.0817082
g__Candidatus_Ventrisoma	17067.2	0.16467	1149.74	0.00332278
g__Faecalimonas	16176.5	0.156077	10244.1	0.0296057
g__Bariatricus	15970.4	0.154088	16104.6	0.0465426
g__Mucinivorans	15808	0.152522	156639	0.452689
g__Cylindrospermum	15421.2	0.148789	36.6139	0.00010582
g__Brevinema	14767.9	0.142486	57633.3	0.166561
g__Tannockella	14588.8	0.140758	29427.4	0.0850458
g__Faecalibacillus	14326.7	0.138229	38266.6	0.110591
g__Dysosmobacter	14320	0.138164	17018	0.0491823
g__Faecalibacterium	14297	0.137943	31923.5	0.0922597
g__Eggerthella	13585.8	0.13108	26081	0.0753747
g__Diplocloster	13443.5	0.129708	14593.9	0.0421768
g__Candidatus_Limiplasma	13387.2	0.129165	372049	1.07523
g__Candidatus_Epulonipiscium	13179.1	0.127156	33997.9	0.0982545
g__Citrobacter	13169.2	0.127061	4359.23	0.0125983
g__Murimonas	13140.4	0.126783	10675.7	0.0308529
g__Ventrimonas	13001.7	0.125445	1066.07	0.00308097
g__Lachnotalea	12476.7	0.12038	12599.8	0.0364136
g__Agathobacter	12264.9	0.118336	21584.2	0.0623789
g__Candidatus_Methanoflexus	12119.9	0.116937	722.997	0.00208948
g__Candidatus_Merdivicinus	12027.2	0.116043	18151.7	0.0524588
g__Alistipes	11997.2	0.115754	334675	0.967218
g__Cellulosilyticum	11962.4	0.115418	25014.5	0.0722925
g__Parablautia	11912.1	0.114932	9847.87	0.0284605
g__Klebsiella	11892.7	0.114745	9903.71	0.0286219
g__Faecalispora	11686.6	0.112757	25830.3	0.0746502
g__unclassified_d__Viruses	11533	0.111275	90939.4	0.262817
g__Paraclostridium	11361.3	0.109618	194477	0.562044
g__Candidatus_Metalachnospira	11268.1	0.108719	11029.8	0.0318764
g__Massilimicrobiota	11142.5	0.107507	215500	0.6228
g__Mobilisporobacter	11011.5	0.106243	8700.61	0.025145
g__Bradyrhizobium	10660.7	0.102858	395425	1.14279
g__Schaedlerella	10639.6	0.102655	11198.9	0.0323652
g__Sinanaerobacter	10447.5	0.100801	27196	0.0785971
g__unclassified_f__Oscillospiraceae	10284.4	0.0992277	33983.8	0.0982139
g__Massiliimalia	10173.2	0.0981549	34458.8	0.0995867
g__Fusobacterium	9996.58	0.0964506	39960.3	0.115486
g__unclassified_d__Archaea	9880.12	0.095327	9475.81	0.0273853
g__Tissierella	9801.39	0.0945674	39327.6	0.113658
g__Merdibacter	9800.63	0.09456	164267	0.474734
g__Luxibacter	9723.78	0.0938185	7041.18	0.0203492
g__Harryflintia	9711.3	0.0936982	27261.6	0.0787865
g__Sellimonas	9611.82	0.0927383	10139.2	0.0293026
g__Lawsonia	9335.73	0.0900745	36337.5	0.105016
g__Desulfosporosinus	9324.32	0.0899644	21536.7	0.0622415
g__Intestinibacillus	9296.42	0.0896952	22603.9	0.0653258
g__Enterobacter	9072.68	0.0875365	5067.94	0.0146465
g__Anaeromicropila	9048.17	0.0873	7760.39	0.0224277
g__Actinoplanes	9026.18	0.0870879	18332.6	0.0529817
g__Acetobacterium	8897.81	0.0858493	22908.4	0.0662058
g__Chroococcidiopsis	8800.98	0.084915	2222.72	0.00642372
g__Lactonifactor	8729.48	0.0842252	11716.8	0.0338618
g__Phocaeicola	8511.01	0.0821173	36699.2	0.106062
g__Candidatus_Pelethocola	8234.81	0.0794525	7032.64	0.0203245
g__Lachnospira	8228.37	0.0793903	12801.7	0.0369972
g__Sphingomicrobium	8135.38	0.0784931	8490.61	0.024538
g__Mycoplasma	8073.96	0.0779005	85825.1	0.248036
g__Solobacterium	7958.5	0.0767865	82186.6	0.237521
g__Candidatus_Gallacutalibacter	7899.93	0.0762214	18569.9	0.0536673
g__Microlunatus	7860.52	0.0758411	12216.8	0.0353069
g__Fumia	7796.98	0.0752281	19075.1	0.0551276
g__Sporomusa	7768.02	0.0749487	18969.3	0.0548216
g__unclassified_p__Euryarchaeota	7714.7	0.0744342	2114.21	0.00611011
g__Desulfitobacterium	7696.96	0.0742631	15421.6	0.0445686
g__Prevotella	7609.86	0.0734227	44438.1	0.128427
g__Listeria	7580.91	0.0731434	26319.5	0.0760638
g__Emergencia	7444.56	0.0718278	62520	0.180684
g__Salmonella	7303.51	0.0704669	14114.4	0.040791
g__Cuneatibacter	7301.42	0.0704468	19652.1	0.0567949
g__Holdemanella	7231.9	0.069776	60524.5	0.174917
g__Traorella	7216.67	0.0696291	98582.3	0.284905
g__Negativibacillus	7155.99	0.0690436	11730	0.0339
g__Faecalicoccus	7115.88	0.0686566	66467.9	0.192094
g__Cryobacterium	7079.27	0.0683034	2208.5	0.00638262
g__Phascolarctobacterium	7046.02	0.0679825	15475.4	0.0447241
g__Bacilliculturomica	7027.81	0.0678069	14332.2	0.0414203
g__Neobittarella	7015.45	0.0676877	6407.12	0.0185167
g__Otoolea	6930.19	0.066865	1940.37	0.00560772
g__Succinispira	6863.76	0.066224	2342.73	0.00677053
g__Methanothermobacter	6717.44	0.0648123	83.0569	0.00024004
g__Pseudonocardia	6681.39	0.0644645	50155	0.144949
g__Desulfomicrobium	6648.76	0.0641496	35253	0.101882
g__Massilicoli	6593.72	0.0636186	39000.4	0.112712
g__Sporofaciens	6512.66	0.0628365	7450.1	0.021531
g__Romboutsia	6507.41	0.0627859	175352	0.50677
g__Brotaphodocola	6415.97	0.0619036	595.898	0.00172216
g__Fusicatenibacter	6412.79	0.0618729	5749.26	0.0166155
g__Muricomes	6321.57	0.0609928	5511.3	0.0159278
g__Fretibacterium	6317.34	0.060952	51329.1	0.148342
g__Candidatus_Faecimonas	6221.81	0.0600302	38728.4	0.111926
g__Qiania	6210.32	0.0599195	4988.25	0.0144162
g__Lactococcus	6144.69	0.0592862	15158.9	0.0438096
g__Sphingomonas	6120.45	0.0590524	43709.7	0.126322
g__Erysipelothrix	6080.54	0.0586672	58783.7	0.169886
g__Anaerobium	5858.88	0.0565285	8691.73	0.0251193
g__Yanshouia	5833.5	0.0562837	28409.1	0.0821028
g__Agromyces	5727.96	0.0552655	29792.8	0.0861017
g__Konateibacter	5707.93	0.0550722	6031.1	0.01743
g__Cloacibacillus	5679.63	0.0547991	18284.9	0.0528438
g__Vallitalea	5664.37	0.0546519	19458	0.0562339
g__Streptomyces	5621.97	0.0542428	44170.5	0.127654
g__Mobilitalea	5617.07	0.0541956	12717.9	0.0367549
g__Candidatus_Merdicola	5579.8	0.0538359	12756.1	0.0368653
g__Claveliimonas	5528.52	0.0533412	5278.56	0.0152552
g__Niameybacter	5502.89	0.0530938	13037.4	0.0376785
g__Candidatus_Pelethousia	5483.5	0.0529068	15404.2	0.0445184
g__Solirubrobacter	5478.36	0.0528572	44179.8	0.127681
g__Youxingia	5470.11	0.0527776	16137.5	0.0466376
g__Odoribacter	5466.2	0.0527398	88265.3	0.255089
g__Caproicibacterium	5428.65	0.0523776	6979.48	0.0201709
g__Brachyspira	5425.15	0.0523439	72051.3	0.20823
g__Candidatus_Onthousia	5351.44	0.0516326	37445.7	0.108219
g__Streptococcus	5316.68	0.0512972	26405.7	0.0763131
g__Terrisporobacter	5242.68	0.0505833	65128	0.188221
g__Basidiobolus	5210.04	0.0502683	762.594	0.00220391
g__Caproicibacter	5081.86	0.0490316	8468.7	0.0244747
g__Alkaliphilus	5022.53	0.0484592	17562.7	0.0507565
g__Fusibacter	4957.59	0.0478326	7756.05	0.0224151
g__Scatolibacter	4943.04	0.0476922	27940.4	0.0807483
g__Deferribacter	4922.34	0.0474925	3048.75	0.00881096
g__Pluralibacter	4893	0.0472095	305.411	0.00088264
g__Faecousia	4821.64	0.0465209	10276.9	0.0297005
g__Zongyangia	4812.7	0.0464346	25173.4	0.0727518
g__Candidatus_Soleaferrea	4805.45	0.0463647	11941	0.0345099
g__Turicibacter	4778.63	0.0461059	23356.7	0.0675012
g__Raoultibacter	4716.83	0.0455096	11013.7	0.03183
g__Marmoricola	4640.34	0.0447716	16343	0.0472316
g__Candidatus_Caccousia	4593.95	0.0443241	7986.89	0.0230823
g__Acetanaerobacterium	4448.21	0.0429179	8040.27	0.0232366
g__Candidatus_Scybalomonas	4423.46	0.0426792	5573.4	0.0161073
g__Candidatus_Galloscillospira	4406.74	0.0425178	11750.8	0.0339602
g__unclassified_o__Nitrosopumilales	4379.25	0.0422525	3937.41	0.0113792
g__Dysgonomonas	4323.24	0.0417122	27923.2	0.0806986
g__Merdimonas	4309.27	0.0415775	3218.85	0.00930254
g__Cohnella	4297.38	0.0414627	6854.22	0.0198088
g__unclassified_p__Candidatus_Saccharibacteria	4292.41	0.0414147	17531.4	0.050666
g__Amorphoplanes	4251.58	0.0410208	4134.93	0.01195
g__Pseudomonas	4195.02	0.040475	283990	0.820739
g__Anaerobutyricum	4178.44	0.0403151	11097.5	0.0320719
g__Candidatus_Galacturonibacter	4134.07	0.039887	5313.06	0.0153549
g__Solidesulfovibrio	4112.15	0.0396755	21007.8	0.060713
g__Marvinbryantia	4098.28	0.0395417	3151.15	0.00910689
g__Candidatus_Coprocola	4091.51	0.0394763	2758.72	0.00797277
g__Pedococcus	4071.43	0.0392827	3177.94	0.00918431
g__Staphylococcus	4055.46	0.0391286	36629.8	0.105861
g__Micromonospora	4041.31	0.038992	8091.9	0.0233858
g__Rikenella	4015.54	0.0387434	169759	0.490608
g__Thermoclostridium	3996.29	0.0385576	8509.17	0.0245917
g__Suilimivivens	3968.44	0.038289	3418.46	0.00987942
g__Sakamotonia	3937.61	0.0379915	1031.34	0.00298058
g__Gallicola	3934.02	0.0379569	9393.49	0.0271474
g__Sebaldella	3927.54	0.0378944	3811.25	0.0110146
g__Neobacillus	3868.88	0.0373284	7282.86	0.0210476
g__Pelotomaculum	3855.28	0.0371971	10186.7	0.0294399
g__Syntrophomonas	3822.73	0.0368831	6684.41	0.0193181
g__Scandinavium	3821.32	0.0368694	949.664	0.00274455
g__Pseudodesulfovibrio	3763.9	0.0363155	25183.8	0.0727818
g__Frisingicoccus	3748.54	0.0361673	7135.62	0.0206221
g__Sporanaerobium	3744.46	0.0361279	5540.84	0.0160132
g__Alkalibaculum	3740.38	0.0360885	5021.62	0.0145126
g__Zhenpiania	3713.37	0.0358279	6760.16	0.019537
g__Faecalitalea	3704.57	0.035743	30067.1	0.0868946
g__Aequitasia	3515.98	0.0339235	5659.75	0.0163568
g__Entrophospora	3475.52	0.0335331	7957.96	0.0229987
g__Catenibacterium	3473.56	0.0335142	19012	0.054945
g__Candidatus_Limivivens	3461.58	0.0333986	5167.44	0.014934
g__Anaerosacchariphilus	3453.52	0.0333208	6055.64	0.0175009
g__Lutispora	3408.22	0.0328837	12338	0.0356572
g__Zhenhengia	3403.47	0.0328379	3684.03	0.0106469
g__Intestinibacter	3400.05	0.0328049	20309.9	0.058696
g__Dehalobacter	3397.51	0.0327804	10735.3	0.0310254
g__unclassified_o__Methanobacteriales	3389.19	0.0327001	32.8112	9.483e-05
g__Bittarella_(ex_Durand_et_al._2017)	3374.05	0.0325541	6289.01	0.0181754
g__Candidatus_Ventrousia	3346.09	0.0322843	13691.9	0.03957
g__Petralouisia	3286.51	0.0317094	1840.76	0.00531985
g__Candidatus_Fimimorpha	3276.53	0.0316132	12205.2	0.0352733
g__Thermoanaerobacter	3273.73	0.0315861	4773.87	0.0137966
g__Calditerrivibrio	3268.73	0.0315379	2044.32	0.00590812
g__Pseudobutyrivibrio	3250.91	0.0313659	6919.13	0.0199964
g__Desulfobulbus	3249.55	0.0313529	13334.6	0.0385371
g__Mycobacterium	3218.73	0.0310554	383253	1.10761
g__Anaerofustis	3217.29	0.0310416	31394.3	0.0907302
g__Hydrogeniiclostridium	3214.91	0.0310187	4324.44	0.0124977
g__Massilioclostridium	3207.31	0.0309453	12108.8	0.0349946
g__Candidatus_Fimihabitans	3207.14	0.0309436	118185	0.341557
g__Gaiella	3201.59	0.0308901	48982.3	0.14156
g__Vibrio	3191.82	0.0307958	591927	1.71068
g__Mesorhizobium	3183.97	0.0307201	116239	0.335932
g__unclassified_p__Candidatus_Omnitrophota	3183.25	0.0307132	12650.8	0.0365612
g__Candidatus_Scybalousia_(ex_Gilroy_et_al._2021)	3152.96	0.0304209	42284.3	0.122202
g__Candidatus_Avoscillospira	3151.11	0.0304031	3744.18	0.0108208
g__Flintibacter	3144.69	0.0303411	3951.72	0.0114206
g__Muribaculum	3118.13	0.0300848	6284.68	0.0181629
g__Rubrobacter	3051.96	0.0294464	12391.1	0.0358104
g__Variimorphobacter	3026.5	0.0292008	3023.6	0.00873827
g__Tepidibacter	3013.03	0.0290708	15356.1	0.0443795
g__Allocoprobacillus	2975.13	0.0287052	10318.7	0.0298213
g__Sphaerochaeta	2972.07	0.0286756	9375.61	0.0270957
g__unclassified_o__Candidatus_Gastranaerophilales	2971.19	0.0286671	11330.4	0.032745
g__Phytophthora	2959.09	0.0285503	1793.3	0.00518269
g__Conexibacter	2920.59	0.0281789	54888.7	0.158629
g__Candidatus_Adiutrix	2911.97	0.0280957	10013	0.0289378
g__Petroclostridium	2884.4	0.0278297	11032.6	0.0318845
g__Bianquea	2868.66	0.0276779	4430.28	0.0128036
g__Candidatus_Scybalocola_(ex_Gilroy_et_al._2021)	2867.85	0.02767	4166.83	0.0120422
g__Microvirga	2854.58	0.027542	18707.7	0.0540657
g__Acinetobacter	2844.82	0.0274478	21905.7	0.063308
g__Oliverpabstia	2827.84	0.0272841	2753.98	0.00795906
g__Thermoanaerobacterium	2817.34	0.0271827	5159.76	0.0149118
g__Tannerella	2792.8	0.0269459	21388.3	0.0618126
g__Megasphaera	2779.07	0.0268135	5548.2	0.0160344
g__Candidatus_Fimicola	2777.15	0.026795	3257.5	0.00941424
g__Carnobacterium	2756.08	0.0265917	6324.64	0.0182783
g__Candidatus_Caccovicinus	2717.41	0.0262185	645.587	0.00186576
g__Suonthocola	2708.85	0.026136	3444.03	0.00995331
g__Desulfosarcina	2701.85	0.0260685	12287.8	0.0355121
g__Candidatus_Cottocaccamicrobium	2668.57	0.0257473	1837.08	0.0053092
g__Anaeropeptidivorans	2639.03	0.0254623	5044.15	0.0145777
g__Aminivibrio	2636.62	0.0254391	18967.4	0.0548161
g__Geovibrio	2602.98	0.0251145	2084.23	0.00602346
g__Crenobacter	2584.69	0.024938	604.802	0.00174789
g__Parasporobacterium	2579.94	0.0248922	2499.5	0.00722362
g__Schistosoma	2562.49	0.0247239	341.436	0.00098676
g__Mycolicibacterium	2536.06	0.0244689	263622	0.761874
g__Zhaonella	2526.48	0.0243764	3381.57	0.00977281
g__Paraeggerthella	2509.36	0.0242112	4329.09	0.0125112
g__Proteiniborus	2501.27	0.0241332	8167.32	0.0236037
g__Brevibacillus	2495.63	0.0240788	6780.3	0.0195952
g__Ureaplasma	2477.91	0.0239078	61385.1	0.177404
g__Deferrivibrio	2476.87	0.0238977	1306.03	0.00377445
g__Flavobacterium	2468.16	0.0238137	27744.7	0.0801828
g__Novisyntrophococcus	2432.94	0.0234739	2501.76	0.00723013
g__Candidatus_Egerieimonas	2413.31	0.0232845	2295.78	0.00663485
g__Hominisplanchenecus	2409.25	0.0232453	2948.46	0.00852111
g__Mordavella	2378.97	0.0229531	2391.08	0.00691027
g__Desulforamulus	2341.35	0.0225902	56512.2	0.163321
g__Vagococcus	2338.17	0.0225595	9394.84	0.0271513
g__Pelosinus	2337.26	0.0225508	4842.24	0.0139942
g__Candidatus_Pullilachnospira	2326.47	0.0224466	1507.21	0.00435586
g__Defluviitalea	2319.14	0.0223759	4229.5	0.0122233
g__Feifania	2293.64	0.0221299	6387.92	0.0184612
g__Wansuia	2270.52	0.0219068	3232	0.00934054
g__Gallintestinimicrobium	2251.41	0.0217224	2659.32	0.0076855
g__Colidextribacter	2227.41	0.0214909	3193.29	0.00922869
g__Paractinoplanes	2202.95	0.0212549	5621.37	0.0162459
g__Pseudolabrys	2197.12	0.0211986	120802	0.34912
g__Oleidesulfovibrio	2187.26	0.0211035	6687.31	0.0193265
g__Fundidesulfovibrio	2165.99	0.0208983	7859.21	0.0227133
g__Campylobacter	2162.89	0.0208684	7119.71	0.0205761
g__Tepidanaerobacter	2153.06	0.0207735	5867.79	0.016958
g__Ohessyouella	2144.86	0.0206944	3748.08	0.010832
g__Flexistipes	2136.34	0.0206122	1511.75	0.004369
g__Paludibacter	2128.95	0.0205408	22274.6	0.0643742
g__Craterilacuibacter	2123.21	0.0204855	80.7486	0.00023337
g__Candidatus_Faecivivens	2121.99	0.0204737	2801.54	0.00809651
g__Candidatus_Finniella	2115.62	0.0204122	4533.47	0.0131018
g__Azospirillum	2112.03	0.0203776	25330.7	0.0732062
g__Pectinatus	2111.36	0.0203712	4957.78	0.0143281
g__unclassified_p__Candidatus_Aminicenantota	2087.16	0.0201376	11499.8	0.0332348
g__Candidatus_Pelethosoma	2081.03	0.0200785	68023.3	0.196589
g__Caloramator	2074.81	0.0200185	10992.3	0.0317679
g__Candidatus_Egerieousia	2070.63	0.0199782	22851.4	0.066041
g__Monoglobus	2068.16	0.0199543	8688.99	0.0251114
g__Aphanomyces	2062.17	0.0198966	3986.94	0.0115223
g__Burkholderia	2037.07	0.0196543	7624.63	0.0220353
g__Selenomonas	2023.32	0.0195217	11941.2	0.0345102
g__Denitrovibrio	2020.81	0.0194975	2235.94	0.00646192
g__unclassified_c__Candidatus_Hydrothermia	2007.46	0.0193687	14.3829	4.157e-05
g__Peptacetobacter	2004.47	0.0193398	16294.3	0.0470909
g__Butyricimonas	1991.2	0.0192118	26732.3	0.077257
g__Proteiniclasticum	1985.71	0.0191588	13262	0.0383274
g__Acholeplasma	1968.26	0.0189905	76346.6	0.220643
g__Methanosarcina	1961.81	0.0189282	4782.52	0.0138216
g__Oxobacter	1956.59	0.0188778	5393.79	0.0155882
g__Candidatus_Acidiferrum	1952.28	0.0188363	22102.5	0.0638766
g__Helicobacter	1938.89	0.0187072	7651.82	0.0221139
g__Hathewaya	1938.04	0.0186989	6050.08	0.0174849
g__Youngiibacter	1937.76	0.0186962	2059.27	0.00595134
g__Lysinibacillus	1936.19	0.0186811	5462.12	0.0157856
g__Waltera	1935.16	0.0186711	2170.49	0.00627277
g__Bifidobacterium	1923.54	0.018559	5075.45	0.0146682
g__Malacoplasma	1920.06	0.0185254	40873.2	0.118124
g__Nostoc	1913.15	0.0184588	1862.31	0.00538212
g__Pyramidobacter	1910.34	0.0184317	6447.07	0.0186322
g__Moorella	1904.83	0.0183785	6230.49	0.0180063
g__Methyloceanibacter	1896.38	0.018297	390607	1.12886
g__Chakrabartyella	1891.19	0.0182469	20171	0.0582946
g__Candidatus_Accumulibacter	1891.06	0.0182456	8368.63	0.0241855
g__Candidatus_Choladousia	1884.59	0.0181832	1612.71	0.00466078
g__Peribacillus	1878.87	0.018128	4030.23	0.0116475
g__Methanosphaera	1878.43	0.0181238	5267.94	0.0152245
g__Desulfolutivibrio	1874.98	0.0180905	3246.57	0.00938265
g__unclassified_p__Candidatus_Paceibacterota	1872.97	0.0180711	6406.99	0.0185163
g__Holtiella	1861.62	0.0179616	2654.27	0.00767089
g__Geosporobacter	1848.83	0.0178381	6440.36	0.0186128
g__Candidatus_Scatomorpha	1841.47	0.0177672	3600.99	0.0104069
g__Oribacterium	1834.99	0.0177046	3968.55	0.0114692
g__Papillibacter	1833.74	0.0176926	6289.85	0.0181778
g__Guopingia	1810.31	0.0174665	10963.4	0.0316844
g__Candidatus_Faecisoma	1792.7	0.0172966	121386	0.350808
g__Solibaculum	1780.63	0.0171802	4165.3	0.0120378
g__Megamonas	1777.99	0.0171547	10027.5	0.0289796
g__Cetobacterium	1765.82	0.0170372	253784	0.73344
g__Dehalobacterium	1750.76	0.016892	6429.86	0.0185825
g__Actinomycetospora	1748.61	0.0168712	53377.9	0.154263
g__Sporolactobacillus	1743.74	0.0168242	1988.33	0.00574632
g__Catonella	1736.09	0.0167504	1196.16	0.00345692
g__Marinisporobacter	1735.39	0.0167437	4716.62	0.0136311
g__Breznakiella	1734.37	0.0167338	3111.24	0.00899154
g__Ilumatobacter	1724.51	0.0166387	10761.1	0.0310999
g__Candidatus_Formimonas	1722.85	0.0166227	5444.65	0.0157351
g__Collinsella	1709.72	0.016496	9616.4	0.0277916
g__Culicoidibacter	1707.44	0.016474	1885.71	0.00544975
g__Lachnoanaerobaculum	1702.46	0.0164259	2626.12	0.00758954
g__Proteocatella	1699.21	0.0163946	101812	0.294238
g__Hominibacterium	1694.08	0.0163451	2636.18	0.00761861
g__Rhizobium	1690.06	0.0163063	16723.1	0.0483302
g__Candidatus_Caccomorpha	1682.7	0.0162353	2141.32	0.00618847
g__Virgibacillus	1673.89	0.0161503	6523.98	0.0188544
g__Bracoviriform	1670.87	0.0161211	300.68	0.00086897
g__Lysobacter	1665.74	0.0160717	3886.16	0.0112311
g__Candidatus_Choladocola	1658.89	0.0160056	4046.24	0.0116937
g__Amaricoccus	1654.03	0.0159586	46481.6	0.134333
g__Sporobacter	1652.79	0.0159467	3010.52	0.00870047
g__Dethiosulfovibrio	1637.12	0.0157955	6952.61	0.0200932
g__Rhodobacter	1607.3	0.0155078	4693.29	0.0135637
g__Pyrenochaeta	1602.3	0.0154596	32.0798	9.271e-05
g__Seleniivibrio	1592.79	0.0153678	1670.69	0.00482832
g__Syntrophobotulus	1588.62	0.0153276	2319.74	0.0067041
g__Oxalobacter	1582.06	0.0152643	5542.49	0.0160179
g__Xylanivirga	1578.04	0.0152255	5262.23	0.0152079
g__Baekduia	1576.16	0.0152073	24956.6	0.072125
g__unclassified_p__Candidatus_Hydrogenedentota	1564.33	0.0150933	9523.24	0.0275224
g__Cytobacillus	1563.75	0.0150876	6098.43	0.0176246
g__unclassified_p__Candidatus_Neomarinimicrobiota	1560.38	0.0150551	7969.48	0.023032
g__Gehongia	1547.09	0.0149269	5671.93	0.016392
g__Garciella	1531.88	0.0147801	5081.38	0.0146853
g__Adlercreutzia	1520.95	0.0146747	4656.12	0.0134563
g__Duncaniella	1520.84	0.0146736	13358.6	0.0386067
g__Maridesulfovibrio	1491.02	0.0143859	11351.9	0.0328073
g__Lientehia	1490.8	0.0143838	3286.96	0.00949938
g__Natranaerovirga	1489.14	0.0143678	1525.07	0.0044075
g__Trichococcus	1484.63	0.0143243	4629.02	0.013378
g__Acidaminococcus	1469.54	0.0141787	3272.05	0.00945629
g__Gottschalkia	1465.56	0.0141403	2327.61	0.00672683
g__Anaeromonas	1461.54	0.0141014	1763.58	0.00509678
g__Millionella	1461.36	0.0140998	44916.7	0.12981
g__Thermocaproicibacter	1456.71	0.0140549	2137.26	0.00617672
g__Peptoniphilus	1454.07	0.0140293	5240.24	0.0151444
g__Halodesulfovibrio	1450.68	0.0139967	5571.49	0.0161017
g__Catenibacillus	1442.74	0.0139201	1392.99	0.00402578
g__Terrimicrobium	1439.22	0.0138861	4732.48	0.013677
g__Rhizopus	1437.77	0.0138721	4079.07	0.0117886
g__Floccifex	1431.99	0.0138164	31354.7	0.0906157
g__Candidatus_Merdenecus	1431.93	0.0138158	2020.87	0.00584036
g__Candidatus_Nitrosocosmicus	1431.93	0.0138158	5120.47	0.0147983
g__Metabacillus	1429.85	0.0137957	5064.02	0.0146351
g__unclassified_o__Candidatus_Saccharimonadales	1421.5	0.0137152	8392.32	0.024254
g__Candidatus_Pullichristensenella	1419.27	0.0136936	6572.21	0.0189938
g__Mogibacterium	1414.72	0.0136498	6216.83	0.0179668
g__Limisalsivibrio	1411.91	0.0136227	563.641	0.00162894
g__Congzhengia	1407.83	0.0135833	3620.6	0.0104636
g__Irregularibacter	1405.88	0.0135644	2617.3	0.00756405
g__Carboxydothermus	1403.66	0.013543	1439.74	0.00416089
g__Candidatus_Faecaligallichristensenella	1389.23	0.0134038	5200.98	0.0150309
g__Desertimonas	1382.03	0.0133343	4783.92	0.0138256
g__Arabiibacter	1380.03	0.013315	3227.54	0.00932766
g__unclassified_o__Erysipelotrichales	1379.65	0.0133114	434.207	0.00125487
g__Macellibacteroides	1373.05	0.0132477	7470.9	0.0215911
g__Candidatus_Onthocola	1372.23	0.0132397	76561.6	0.221265
g__Humidesulfovibrio	1370.04	0.0132186	5267.3	0.0152226
g__unclassified_p__Candidatus_Cloacimonadota	1366.79	0.0131872	7319.96	0.0211548
g__Candidatus_Ventricola	1361.42	0.0131355	4590.12	0.0132655
g__Brotonthovivens	1345.76	0.0129844	3765.98	0.0108837
g__Priestia	1326.96	0.012803	4285.42	0.012385
g__Candidatus_Bathycorpusculum	1312.22	0.0126607	993.241	0.00287049
g__Vischeria	1309.87	0.0126381	132.699	0.0003835
g__Peptostreptococcus	1289.88	0.0124453	3082.18	0.00890758
g__Saccharofermentans	1288.89	0.0124357	4845.71	0.0140042
g__Paeniclostridium	1277.99	0.0123305	63668.7	0.184004
g__Candidatus_Fimivicinus	1276.6	0.0123171	2241.88	0.00647908
g__Dubosiella	1273.26	0.0122849	14206.5	0.0410572
g__Candidatus_Avidehalobacter	1266.28	0.0122175	11054.7	0.0319483
g__Fontibacillus	1264.43	0.0121996	852.779	0.00246455
g__Brucepastera	1256.44	0.0121225	2342.27	0.00676922
g__Panaeolus	1247.87	0.0120399	0	0
g__Rhizophagus	1246.87	0.0120303	8368.99	0.0241866
g__Candidatus_Pelagibacter	1242.43	0.0119874	6467.39	0.0186909
g__Acidaminobacter	1235.27	0.0119183	3348.94	0.0096785
g__Candidatus_Thiodiazotropha	1234.98	0.0119155	4632.53	0.0133881
g__Aminobacterium	1233.35	0.0118998	8492.6	0.0245438
g__Desulfocurvus	1221.74	0.0117878	2651.82	0.00766382
g__Massilistercora	1210.9	0.0116832	729.063	0.00210701
g__Caldisalinibacter	1203.73	0.011614	1733.44	0.00500968
g__Dialister	1199.23	0.0115706	2356.33	0.00680985
g__Candidatus_Paraimprobicoccus	1192.01	0.011501	198.989	0.00057508
g__unclassified_f__Eubacteriales_Family_XIII._Incertae_Sedis	1179.08	0.0113762	4638.68	0.0134059
g__Candidatus_Enterenecus	1176.61	0.0113523	1900.74	0.00549319
g__Candidatus_Egerieicola	1166.47	0.0112545	1882.36	0.00544005
g__Serratia	1160.39	0.0111959	4760.81	0.0137588
g__Clostridiisalibacter	1155.71	0.0111507	860.587	0.00248711
g__Candidatus_Scatomonas	1153.98	0.011134	1372.43	0.00396636
g__Methanocorpusculum	1150.43	0.0110998	2621.23	0.0075754
g__Synergistes	1144.4	0.0110416	4829.17	0.0139564
g__Jidongwangia	1142.76	0.0110258	968.025	0.00279761
g__Thermincola	1141.64	0.0110149	1863.17	0.00538461
g__Maledivibacter	1138.3	0.0109827	8201.37	0.0237021
g__Candidatus_Colinaster	1134.79	0.0109488	2044.2	0.00590779
g__Buttiauxella	1134.59	0.010947	323.262	0.00093423
g__Chryseobacterium	1129.95	0.0109022	9924.32	0.0286815
g__Alitiscatomonas	1127.05	0.0108742	324.08	0.0009366
g__Candidatus_Merdisoma	1126.15	0.0108655	4283.54	0.0123795
g__Allobaculum	1124.38	0.0108485	5947.86	0.0171894
g__Geobacillus	1114.54	0.0107535	3404.89	0.00984021
g__Candidatus_Limivicinus	1114.15	0.0107497	2014.28	0.00582132
g__Trabulsiella	1113.47	0.0107431	149.746	0.00043277
g__Victivallis	1109.83	0.0107081	5127.75	0.0148193
g__Anaerobacterium	1098.45	0.0105983	2186.89	0.00632017
g__Candidatus_Fimiplasma	1091.6	0.0105321	4199.42	0.0121364
g__unclassified_p__Candidatus_Poribacteria	1088.01	0.0104975	5227.74	0.0151083
g__unclassified_p__Candidatus_Rokuibacteriota	1087.05	0.0104883	8134.98	0.0235103
g__Flexilinea	1082.5	0.0104444	3298.05	0.00953143
g__Umbelopsis	1079.96	0.0104199	601.154	0.00173735
g__Vescimonas	1076.13	0.0103829	2124.92	0.00614106
g__Limosilactobacillus	1074.37	0.0103659	2282.09	0.00659529
g__Raoultella	1070.78	0.0103313	667.478	0.00192903
g__Desulfonispora	1070.58	0.0103294	1384.14	0.00400019
g__Candidatus_Onthovivens	1064.24	0.0102682	11105	0.0320938
g__Telmatospirillum	1062.36	0.0102501	6998.84	0.0202268
g__Lactobacillus	1061.83	0.0102449	8738.35	0.025254
g__Veillonella	1058.3	0.0102109	9256.14	0.0267504
g__Propionispira	1056.14	0.01019	3966.93	0.0114645
g__Mahella	1054.67	0.0101758	3281.64	0.00948402
g__Oceanirhabdus	1053.69	0.0101663	3003.58	0.00868041
g__Dethiosulfatibacter	1048.92	0.0101204	3730.57	0.0107814
g__Endomicrobium	1044.06	0.0100735	10865.2	0.0314007
g__Schnuerera	1043	0.0100633	4445.71	0.0128482
g__Ottowia	1042	0.0100536	2891.92	0.00835771
g__unclassified_f__Methanomassiliicoccaceae	1031.84	0.0099556	826.678	0.00238912
g__Sporosarcina	1029.69	0.00993479	2912.06	0.00841592
g__Faecalibaculum	1029.25	0.00993062	2895.71	0.00836866
g__Maliibacterium	1021.77	0.00985836	3131.39	0.0090498
g__Cereibacter	1020.68	0.00984784	1374.26	0.00397165
g__Amphibacillus	1017.66	0.00981873	1575.57	0.00455344
g__Coprinopsis	1016.43	0.00980685	76.9125	0.00022228
g__Caldicoprobacter	1013.72	0.00978073	8450.44	0.0244219
g__Caldalkalibacillus	1012.6	0.00976989	1951.67	0.00564038
g__Thermosyntropha	1010.54	0.00975003	554.597	0.0016028
g__Halobacillus	1004.34	0.00969023	7204.72	0.0208218
g__Pseudorhodoplanes	1000.5	0.00965315	19663.7	0.0568284
g__Anaerovirgula	999.933	0.00964772	2209.4	0.0063852
g__Oceanobacillus	997.811	0.00962724	4296	0.0124155
g__Candidatus_Scatovivens	996.619	0.00961575	8955.4	0.0258813
g__Pedobacter	994.305	0.00959342	6642.12	0.0191959
g__Anaerococcus	991.923	0.00957043	2702.88	0.00781138
g__Faecalimicrobium	984.141	0.00949535	44120.2	0.127508
g__Candidatus_Scatavimonas	978.956	0.00944532	2054.75	0.00593827
g__Aeromonas	977.115	0.00942756	98683.9	0.285199
g__Yeguia	977.102	0.00942744	2558.71	0.00739474
g__Marinitoga	972.606	0.00938406	613.804	0.00177391
g__Candidatus_Spyradocola	969.381	0.00935294	4949.47	0.0143041
g__Lutibacter	965.981	0.00932013	4878.68	0.0140995
g__Gracilibacillus	964.969	0.00931037	5450.47	0.015752
g__Hominenteromicrobium	964.437	0.00930523	6916.38	0.0199885
g__Candidatus_Allocopromorpha	962.996	0.00929134	4349.32	0.0125696
g__Candidatus_Paracaedibacter	962.538	0.00928691	21334	0.0616558
g__Fonticella	962.168	0.00928334	928.732	0.00268406
g__Simiaoa	958.008	0.0092432	1348.76	0.00389795
g__Abyssisolibacter	957.899	0.00924216	1445.35	0.0041771
g__Inediibacterium	949.402	0.00916017	8457.96	0.0244437
g__Pseudobacteroides	943.234	0.00910067	3110.18	0.00898849
g__unclassified_p__Candidatus_Methylomirabilota	938.334	0.00905339	15058.2	0.0435185
g__Geobacter	937.049	0.00904099	5476.69	0.0158278
g__Gudongella	936.764	0.00903824	4059.09	0.0117308
g__Massilibacillus	931.798	0.00899033	14157.9	0.0409167
g__Candidatus_Onthovicinus	927.063	0.00894464	1176.25	0.0033994
g__Sporanaerobacter	925.48	0.00892937	3273.3	0.0094599
g__Proteiniphilum	924.288	0.00891786	8304.67	0.0240007
g__Pseudoruminococcus	923.792	0.00891308	1713.13	0.00495099
g__Kluyvera	920.812	0.00888433	192.225	0.00055553
g__Caminicella	920.533	0.00888163	2075.99	0.00599965
g__Rhodoplanes	919.365	0.00887037	81547.2	0.235673
g__Gorillibacterium	916.808	0.0088457	583.525	0.0016864
g__unclassified_p__Candidatus_Dormiibacterota	910.938	0.00878906	15583.3	0.0450362
g__Candidatus_Faecivicinus	908.481	0.00876535	2564.89	0.00741259
g__Candidatus_Onthomonas	908.063	0.00876133	1332.22	0.00385014
g__Paramaledivibacter	904.691	0.00872878	1246.82	0.00360335
g__Anaerospora	893.92	0.00862486	1080.81	0.00312357
g__Sharpea	890.908	0.0085958	10867.4	0.0314071
g__Desulfuromonas	889.142	0.00857876	1834.11	0.00530063
g__Anaerosolibacter	889.106	0.00857842	2895.6	0.00836834
g__Anaerosalibacter	888.916	0.00857658	9603.35	0.0277539
g__Luoshenia	887.713	0.00856498	3659.03	0.0105747
g__unclassified_p__Nitrososphaerota	882.86	0.00851815	12537.8	0.0362345
g__Kribbella	880.521	0.00849558	2703.75	0.00781389
g__Ornithinibacter	879.425	0.00848501	5345.41	0.0154484
g__Aerococcus	874.678	0.00843921	5516.13	0.0159417
g__Rubneribacter	867.049	0.0083656	2187.41	0.00632165
g__Capillimicrobium	863.536	0.00833171	16083.7	0.0464823
g__Fusibacillus	857.827	0.00827663	1243.54	0.00359385
g__unclassified_p__Candidatus_Rifleibacteriota	857.367	0.00827219	3499.06	0.0101124
g__Ligilactobacillus	847.457	0.00817657	6338.71	0.018319
g__Thauera	844.234	0.00814547	3095.46	0.00894595
g__Photobacterium	838.966	0.00809465	253497	0.732611
g__Coprobacter	837.823	0.00808362	18399.6	0.0531753
g__Rhodococcus	837.592	0.00808139	8131.56	0.0235004
g__Lentihominibacter	836.353	0.00806944	7012.03	0.0202649
g__Jeotgalibaca	833.061	0.00803768	817.814	0.0023635
g__Methanocaldococcus	827.56	0.0079846	44.3072	0.00012805
g__Metaclostridioides	826.657	0.00797588	3808.26	0.011006
g__Gracilaria	821.436	0.00792551	0.8979	2.59e-06
g__Stomatobaculum	819.555	0.00790736	2584.83	0.00747022
g__unclassified_p__Nanoarchaeota	819.185	0.00790379	1862.95	0.00538397
g__Anaerosporomusa	818.856	0.00790062	712.107	0.00205801
g__Jilunia	815.663	0.00786981	1715.61	0.00495814
g__Pelolinea	812.92	0.00784335	569.725	0.00164652
g__Peptoclostridium	809.646	0.00781176	4046.88	0.0116956
g__Leptotrichia	804.409	0.00776123	6070.13	0.0175428
g__Thermanaerosceptrum	802.137	0.00773931	1133.02	0.00327446
g__Maribacter	800.298	0.00772156	1206.28	0.00348618
g__Phycicoccus	799.015	0.00770919	14319.1	0.0413824
g__Candidatus_Syntrophocurvum	797.34	0.00769303	362.214	0.00104681
g__Selenobaculum	796.352	0.00768349	6232.65	0.0180125
g__Propionispora	794.003	0.00766083	1937.22	0.0055986
g__Rhizoclosmatium	792.098	0.00764245	348.662	0.00100764
g__Niallia	788.931	0.00761189	4404.21	0.0127283
g__Desulfotomaculum	777.467	0.00750128	1535.32	0.0044371
g__Exiguobacterium	777.127	0.007498	10526.3	0.0304211
g__unclassified_o__Crassvirales	776.941	0.00749621	39537.2	0.114263
g__Vermiculatibacterium	775.944	0.00748659	2123.94	0.00613823
g__Mycobacteroides	773.892	0.00746679	7123.25	0.0205864
g__Sporosalibacterium	772.939	0.0074576	4295.29	0.0124135
g__Anaerovibrio	771.988	0.00744842	2036.74	0.00588623
g__Anaeromusa	768.249	0.00741235	1828.46	0.0052843
g__Teretinema	767.519	0.00740531	1116.8	0.00322758
g__Acidilutibacter	767.474	0.00740487	3169.14	0.00915888
g__Cellulomonas	764.129	0.00737259	1739.28	0.00502656
g__Fibrobacter	763.284	0.00736444	4216.86	0.0121868
g__Ethanoligenens	756.177	0.00729587	1723.05	0.00497965
g__Gracilibacter	755.715	0.00729141	538.063	0.00155501
g__unclassified_c__Candidatus_Peribacteria	753.67	0.00727168	2273.51	0.0065705
g__unclassified_p__Candidatus_Latescibacterota	752.844	0.00726371	4478.94	0.0129442
g__Olsenella	752.47	0.00726011	798.482	0.00230763
g__unclassified_c__Candidatus_Binatia	751.229	0.00724813	11714.6	0.0338555
g__Acidithiobacillus	750.98	0.00724572	1738.83	0.00502526
g__Candidatus_Ventrenecus	750.211	0.0072383	5823.7	0.0168306
g__Nitrospira	749.907	0.00723537	11479.9	0.0331771
g__Desnuesiella	749.12	0.00722778	2163.67	0.00625306
g__Porcipelethomonas	744.007	0.00717845	1283.08	0.00370814
g__Candidatus_Aphodocola	743.763	0.0071761	9815.52	0.0283671
g__Syntrophus	742.306	0.00716203	2985.37	0.00862779
g__Lachnobacterium	742.102	0.00716007	867.221	0.00250629
g__Ructibacterium	741.476	0.00715403	6099.19	0.0176268
g__Candidatus_Avimonoglobus	738.73	0.00712753	1695.83	0.00490097
g__Candidatus_Egerieenecus	735.552	0.00709687	3947.77	0.0114091
g__Azoarcus	728.726	0.00703101	1918.03	0.00554314
g__Lederbergia	728.029	0.00702429	1063.3	0.00307295
g__Anoxybacillus	724.008	0.00698549	5595.88	0.0161722
g__Sulfurovum	721.677	0.006963	1141.41	0.00329869
g__Drancourtella	720.748	0.00695404	382.241	0.00110469
g__Propionivibrio	720.614	0.00695275	2154.62	0.00622689
g__Chthoniobacter	715.273	0.00690122	1236.73	0.00357416
g__Tabrizicola	710.857	0.00685861	1675.55	0.00484237
g__Haloimpatiens	708.685	0.00683765	3602.59	0.0104116
g__Pseudoalteromonas	706.755	0.00681902	7966.2	0.0230225
g__Rhabdothermincola	703.155	0.0067843	20432.6	0.0590505
g__Trametes	702.285	0.0067759	93.6387	0.00027062
g__Suipraeoptans	695.452	0.00670997	783.596	0.00226461
g__Nocardia	692.45	0.00668101	5998.06	0.0173345
g__Desulfitibacter	690.859	0.00666565	1811.03	0.00523392
g__Falcatimonas	690.529	0.00666248	1201.88	0.00347345
g__Parvimonas	687.392	0.00663221	4321.26	0.0124885
g__Candidatus_Fimenecus	684.527	0.00660457	1645.61	0.00475586
g__Cupriavidus	683.046	0.00659028	3148.38	0.00909888
g__Candidatus_Aphodomorpha	682.02	0.00658038	1046.25	0.00302368
g__Natronincola	680.849	0.00656908	2004.59	0.00579331
g__unclassified_p__Thermoproteota	680.522	0.00656592	12400.4	0.0358373
g__Candidatus_Vecturithrix	680.413	0.00656487	2617.15	0.00756361
g__Candidatus_Coprovivens	678.951	0.00655076	23336.6	0.0674432
g__Yokenella	677.172	0.0065336	17.7693	5.135e-05
g__Candidatus_Methanoplasma	674.528	0.00650809	485.566	0.0014033
g__Sediminispirochaeta	673.848	0.00650153	4005.99	0.0115774
g__Bovifimicola	672.531	0.00648883	5022.46	0.014515
g__Inconstantimicrobium	671.211	0.00647609	1786.08	0.00516181
g__Alternaria	670.648	0.00647066	66.326	0.00019168
g__Junduvirus	666.149	0.00642725	8156.55	0.0235726
g__Anabaena	665.984	0.00642565	185.816	0.00053701
g__Neocucurbitaria	664.219	0.00640863	7.9672	2.303e-05
g__Ureibacillus	659.865	0.00636662	1945.46	0.00562241
g__Intrasporangium	659.328	0.00636144	1717.79	0.00496446
g__Sarcina	658.705	0.00635542	6717.79	0.0194146
g__Edwardsiella	658.268	0.00635121	4790.7	0.0138452
g__Enteroscipio	657.357	0.00634242	1392.1	0.00402318
g__Sphingobacterium	655.712	0.00632655	5459.94	0.0157793
g__Lelliottia	654.32	0.00631312	92.5009	0.00026733
g__Popoffvirus	652.757	0.00629803	11.0207	3.185e-05
g__Jutongia	650.817	0.00627932	611.02	0.00176586
g__unclassified_p__Candidatus_Nomurabacteria	646.171	0.00623449	3821.75	0.0110449
g__Erwinia	645.224	0.00622536	1051.92	0.00304008
g__Couchioplanes	644.338	0.00621681	803.576	0.00232235
g__Entomomonas	641.872	0.00619302	1098.12	0.0031736
g__Mumia	640.398	0.00617879	793.328	0.00229274
g__Legionella	639.545	0.00617056	15424.5	0.0445771
g__Halanaerobium	639.342	0.0061686	2903.37	0.00839081
g__Dethiosulfatarculus	637.199	0.00614793	1379.24	0.00398602
g__Amycolatopsis	636.994	0.00614595	6050.58	0.0174863
g__Oceanidesulfovibrio	636.79	0.00614398	7022.67	0.0202957
g__Methanomassiliicoccus	636.752	0.00614362	924.418	0.00267159
g__Syntrophaceticus	633.582	0.00611303	1484.78	0.00429104
g__Candidatus_Coprosoma	632.959	0.00610701	35648.1	0.103024
g__Mucilaginibacter	631.009	0.00608821	3005.21	0.00868511
g__Thermosinus	630.984	0.00608796	941.222	0.00272015
g__Hydrogenispora	630.183	0.00608023	1292.37	0.00373498
g__Helcococcus	627.103	0.00605052	1495.33	0.00432153
g__Desulfonauticus	626.218	0.00604198	2428.54	0.00701854
g__Arthrobacter	624.584	0.00602621	3468.89	0.0100252
g__Paratissierella	623.1	0.00601189	2162.3	0.00624909
g__Thermoleophilum	621.949	0.00600079	13618.2	0.039357
g__Candidatus_Scatovicinus	620.112	0.00598306	537.489	0.00155335
g__Methanimicrococcus	617.945	0.00596216	1503.5	0.00434514
g__Halomonas	616.082	0.00594418	2933.84	0.00847885
g__unclassified_p__Candidatus_Woesearchaeota	614.718	0.00593102	4579.87	0.0132359
g__Tepidimicrobium	613.22	0.00591657	1310.93	0.00378863
g__Petrocella	612.557	0.00591018	2186.06	0.00631775
g__unclassified_o__Eubacteriales	611.274	0.00589779	3414.44	0.00986781
g__Capnocytophaga	611.025	0.00589539	4171.07	0.0120545
g__Desulfatitalea	608.396	0.00587003	2228.61	0.00644073
g__Candidatus_Aphodoplasma	606.23	0.00584913	2107.19	0.00608982
g__Porphyromonas	605.862	0.00584558	5762.85	0.0166548
g__Paraburkholderia	602.274	0.00581096	6607.29	0.0190952
g__Filifactor	601.873	0.00580709	27920.7	0.0806914
g__Caldicellulosiruptor	601.737	0.00580578	2410.63	0.00696678
g__Breoghania	600.587	0.00579468	2224.57	0.00642907
g__Rhodoferax	596.94	0.0057595	2843.16	0.00821681
g__Glomus	595.632	0.00574688	453.531	0.00131071
g__Desulfonatronum	594.646	0.00573736	2693.22	0.00778346
g__Anaerosphaera	592.873	0.00572026	585.742	0.00169281
g__Hyphomicrobium	591.942	0.00571127	203162	0.587144
g__Providencia	591.537	0.00570737	8595.45	0.024841
g__Pusillibacter	590.282	0.00569526	1790.99	0.005176
g__Aneurinibacillus	590.11	0.0056936	1966.76	0.00568397
g__Crassaminicella	589.686	0.0056895	3428.19	0.00990753
g__Hominiventricola	589.408	0.00568682	3711.05	0.010725
g__Culturomica	589.337	0.00568613	17325	0.0500698
g__Variovorax	588.122	0.00567441	2249.65	0.00650154
g__Acetoanaerobium	586.238	0.00565624	57351.2	0.165746
g__Oceanotoga	585.112	0.00564537	1322.77	0.00382283
g__Johnsonella	583.308	0.00562797	1285.76	0.00371589
g__Miniphocaeibacter	583.221	0.00562712	1741.66	0.00503343
g__Bulleidia	581.929	0.00561466	10659.2	0.0308053
g__Planococcus	579.512	0.00559134	794.005	0.00229469
g__Mesobacillus	577.995	0.00557671	1542.79	0.0044587
g__Aeribacillus	577.92	0.00557598	169.424	0.00048964
g__Desulfoscipio	577.561	0.00557252	809.435	0.00233928
g__Desulfobacter	575.951	0.00555698	2915.51	0.00842589
g__Enteropsectra	575.786	0.00555539	5881.49	0.0169976
g__Psychrobacillus	575.754	0.00555508	1163.73	0.00336322
g__Candidatus_Faecimorpha	574.835	0.00554622	1486.22	0.00429521
g__Nitrosomonas	574.759	0.00554548	9225.88	0.026663
g__Acetobacter	574.385	0.00554188	7565.7	0.021865
g__Anthropogastromicrobium	572.042	0.00551927	1233.96	0.00356617
g__Pelorhabdus	570.188	0.00550138	2404.7	0.00694964
g__Peptoanaerobacter	569.582	0.00549553	3369.45	0.00973777
g__Caldimicrobium	569.188	0.00549173	26.2396	7.583e-05
g__Achromobacter	567.929	0.00547959	1593.77	0.00460602
g__Tenacibaculum	567.804	0.00547838	2086.09	0.00602884
g__Candidatus_Ornithomonoglobus	566.741	0.00546812	3182.21	0.00919665
g__Isobaculum	565.434	0.00545552	555.013	0.001604
g__Aromatoleum	564.279	0.00544437	906.056	0.00261852
g__Desulfatibacillum	562.873	0.0054308	1124.43	0.00324964
g__Spiroplasma	562.805	0.00543015	6053.17	0.0174938
g__Candidatus_Borkfalkia	561.719	0.00541967	6178.32	0.0178555
g__Reyranella	559.933	0.00540244	13989.2	0.0404291
g__Mediterranea	559.255	0.00539589	6619.83	0.0191315
g__Candidatus_Avimonas	558.38	0.00538745	1783.11	0.00515322
g__Riemerella	556.016	0.00536465	1180.56	0.00341186
g__Caldisericum	555.46	0.00535927	85.9892	0.00024851
g__Pseudocitrobacter	555.206	0.00535683	0	0
g__Anaerophilus	554.868	0.00535357	1065.32	0.00307879
g__Sediminibacillus	552.304	0.00532883	264.205	0.00076356
g__Blastococcus	551.623	0.00532226	2087.88	0.00603402
g__Desulfocurvibacter	550.631	0.00531269	3575.99	0.0103347
g__Actinophytocola	548.775	0.00529478	7996.38	0.0231097
g__Tidjanibacter	546.561	0.00527341	37055.3	0.107091
g__Shimazuella	545.576	0.00526392	548.232	0.0015844
g__Petrimonas	543.806	0.00524684	4415.06	0.0127596
g__Rickettsia	542.803	0.00523716	18600	0.0537543
g__Leptolinea	541.548	0.00522505	2226.47	0.00643454
g__Schaalia	541.46	0.0052242	1831.77	0.00529386
g__Candidatus_Improbicoccus	537.43	0.00518532	92.3343	0.00026685
g__Geomonas	536.447	0.00517583	664.36	0.00192001
g__Cucurbitaria	536.275	0.00517417	1.1637	3.36e-06
g__Candidatus_Faecenecus	533.392	0.00514636	7506.77	0.0216947
g__Haemophilus	531.753	0.00513055	1074.09	0.00310413
g__Marinilactibacillus	531.271	0.00512589	436.072	0.00126026
g__unclassified_c__Gammaproteobacteria	531.268	0.00512586	2692.72	0.00778201
g__Alkalibacter	530.492	0.00511838	3461.34	0.0100033
g__Alicyclobacillus	529.679	0.00511053	2718.4	0.00785622
g__Methanococcus	527.136	0.005086	402.836	0.0011642
g__Aeromicrobium	526.76	0.00508237	2531.94	0.00731735
g__Desulfobaculum	523.291	0.00504891	3766.92	0.0108865
g__unclassified_p__Candidatus_Eiseniibacteriota	522.991	0.00504601	5286.83	0.015279
g__Candidatus_Fimisoma	522.606	0.00504229	1127.75	0.00325923
g__Peptococcus	518.643	0.00500405	267.199	0.00077221
g__unclassified_p__Cyanobacteriota	518.054	0.00499837	2681.34	0.00774912
g__Methylobacterium	517.115	0.00498931	6973.15	0.0201526
g__Aristaeella	515.88	0.00497739	1978.47	0.00571781
g__Caldanaerobius	514.581	0.00496486	1862.83	0.00538362
g__Magnetospirillum	514.497	0.00496406	11800	0.0341021
g__Aminiphilus	512.567	0.00494543	2625.4	0.00758747
g__Candidatus_Fimadaptatus	512.52	0.00494498	3304.81	0.00955097
g__Nonomuraea	511.655	0.00493664	2382.3	0.00688489
g__Heyndrickxia	511.015	0.00493046	4600.9	0.0132967
g__Segatella	509.224	0.00491317	5240.02	0.0151438
g__Anaeromicrobium	502.827	0.00485145	3186.77	0.00920983
g__unclassified_f__Inoviridae	499.823	0.00482248	1166.37	0.00337083
g__Chromobacterium	497.445	0.00479953	1870.32	0.00540526
g__Slackia	495.049	0.00477641	1481.47	0.00428149
g__Leclercia	493.375	0.00476026	429.276	0.00124062
g__Dethiobacter	493.341	0.00475993	2228.36	0.00644002
g__Sanguibacteroides	491.609	0.00474322	5151	0.0148865
g__Ramlibacter	491.318	0.00474041	3014.85	0.00871297
g__Candidatus_Caccosoma	484.259	0.0046723	1906.91	0.005511
g__unclassified_p__Candidatus_Zixiibacteriota	482.465	0.00465499	6199.26	0.017916
g__Barnesiella	479.34	0.00462485	10853.1	0.0313657
g__Pantoea	479.014	0.00462171	822.117	0.00237593
g__Massilia	478.088	0.00461277	1695.53	0.00490012
g__Syntrophotalea	477.171	0.00460392	1372.97	0.00396792
g__Georgenia	475.733	0.00459004	652.15	0.00188473
g__Candidatus_Egerieisoma	475.3	0.00458586	1648.32	0.00476368
g__unclassified_c__Candidatus_Bathyarchaeia	474.781	0.00458086	2323.98	0.00671635
g__Leminorella	470.079	0.0045355	594.039	0.00171678
g__Candidatus_Kapaibacterium	468.969	0.00452479	1325.21	0.00382988
g__unclassified_p__Candidatus_Aenigmatarchaeota	468.76	0.00452277	3508.24	0.0101389
g__Alkalibacterium	468.361	0.00451892	1226.94	0.00354588
g__Bordetella	467.88	0.00451428	3146.2	0.00909258
g__Mangrovihabitans	467.302	0.0045087	325.725	0.00094135
g__Methanolobus	466.604	0.00450196	6721.43	0.0194251
g__Mycoplasmoides	465.464	0.00449097	10382.2	0.0300049
g__Halalkalibacter	463.824	0.00447514	831.201	0.00240219
g__Chitinophaga	460.073	0.00443895	5184.21	0.0149825
g__Massilibacteroides	458.557	0.00442432	6531.41	0.0188759
g__Candidatus_Pelethomonas	458.075	0.00441968	627.715	0.00181411
g__Litchfieldia	456.778	0.00440716	233.569	0.00067502
g__Laedolimicola	456.775	0.00440713	847.117	0.00244819
g__Qingrenia	454.225	0.00438253	6540.38	0.0189019
g__Asaccharospora	454.036	0.0043807	3301.78	0.00954222
g__unclassified_p__Candidatus_Melainabacteria	452.739	0.00436819	4216.71	0.0121864
g__unclassified_c__Deltaproteobacteria	451.989	0.00436095	4900.41	0.0141623
g__Methylomusa	451.562	0.00435683	284.993	0.00082364
g__Andreesenia	450.441	0.00434601	2434.46	0.00703564
g__Finegoldia	448.257	0.00432494	815.01	0.00235539
g__unclassified_p__Candidatus_Gottesmanbacteria	447.404	0.00431671	131.858	0.00038107
g__Oceanispirochaeta	447.347	0.00431617	2202.23	0.00636448
g__Thermanaeromonas	447.339	0.00431609	4791.7	0.0138481
g__Senegalimassilia	446.089	0.00430403	831.785	0.00240388
g__Methylobacter	445.482	0.00429817	1404.88	0.00406013
g__Stenotrophomonas	444.054	0.00428439	1811.47	0.00523518
g__Candidatus_Angelobacter	443.351	0.00427761	5774.69	0.016689
g__unclassified_p__Candidatus_Nealsoniibacteriota	443.289	0.00427701	3846.18	0.0111156
g__Candidatus_Gaiellasilicea	443.06	0.00427481	1374.16	0.00397135
g__Ralstonia	440.661	0.00425166	2843.85	0.00821879
g__Francisella	440.206	0.00424726	3378.56	0.00976411
g__Kandleria	439.043	0.00423605	3912.1	0.011306
g__unclassified_o__Methanophagales	436.957	0.00421592	479.407	0.0013855
g__unclassified_o__Chroococcidiopsidales	436.904	0.00421541	167.482	0.00048403
g__Tepidimonas	436.266	0.00420925	782.847	0.00226244
g__Spirochaeta	434.846	0.00419555	1263.07	0.00365031
g__Chara	434.51	0.00419231	788.987	0.00228019
g__Iamia	434.358	0.00419084	10716.1	0.0309696
g__Candidatus_Merdinaster	433.584	0.00418337	1315.43	0.00380162
g__Devosia	432.895	0.00417672	8285.74	0.023946
g__Brotomerdimonas	431.514	0.0041634	1530.29	0.00442256
g__Caloranaerobacter	430.762	0.00415615	2851.98	0.0082423
g__Kurthia	428.554	0.00413485	1040.71	0.00300767
g__Candidatus_Cryosericum	428.31	0.00413249	1080.91	0.00312385
g__Fastidiosipila	425.764	0.00410792	664.85	0.00192143
g__Aliarcobacter	425.693	0.00410724	2195.04	0.00634371
g__Halalkalibacterium_(ex_Joshi_et_al._2022)	424.983	0.00410039	215.392	0.00062249
g__Candidatus_Faeciplasma	424.173	0.00409258	1426.82	0.00412353
g__Candidatus_Ornithocaccomicrobium	421.388	0.00406571	2448.63	0.0070766
g__Anaerolinea	415.168	0.0040057	1818.89	0.00525662
g__Catenisphaera	414.17	0.00399606	3361.42	0.00971458
g__Shewanella	412.384	0.00397883	28417.2	0.0821263
g__Heliomicrobium	411.905	0.00397421	1188.01	0.00343337
g__Xanthomonas	411.61	0.00397136	3664.94	0.0105918
g__Hominilimicola	411.036	0.00396583	3174.61	0.00917469
g__Bosea	410.634	0.00396195	4984.89	0.0144064
g__unclassified_p__Candidatus_Sumerlaeota	410.497	0.00396063	2521.11	0.00728607
g__Limnobaculum	409.686	0.0039528	1872.59	0.00541183
g__Saezia	407.792	0.00393452	476.333	0.00137661
g__Actinomadura	406.536	0.0039224	4841.41	0.0139918
g__Knoellia	405.669	0.00391405	697.561	0.00201596
g__Ferruginibacter	405.565	0.00391304	4059.7	0.0117326
g__Candidatus_Coprenecus	404.232	0.00390018	3338.83	0.00964929
g__Sulfuricurvum	403.722	0.00389526	2144.13	0.00619657
g__Candidatus_Colimorpha	403.304	0.00389122	2255.93	0.00651968
g__Scytonema	402.878	0.00388711	740.108	0.00213893
g__Defluviicoccus	402.799	0.00388635	6521.97	0.0188486
g__Smittium	401.934	0.00387801	3548.41	0.010255
g__Nematocida	401.033	0.00386932	5089.62	0.0147091
g__Brucella	400.513	0.00386429	5335.26	0.015419
g__Arcobacter	399.435	0.00385389	729.222	0.00210747
g__Candidatus_Caccenecus	398.643	0.00384625	7524.74	0.0217467
g__Gilliamella	398.369	0.00384361	2067.99	0.00597654
g__Kosakonia	397.38	0.00383407	152.327	0.00044023
g__Candidatus_Apopatosoma	396.78	0.00382827	1319.83	0.00381432
g__Muricoprocola	396.002	0.00382077	1447.04	0.00418199
g__Succiniclasticum	393.752	0.00379906	443.248	0.001281
g__Senegalia	391.763	0.00377988	4142.78	0.0119727
g__Lucifera	391.618	0.00377848	779.807	0.00225366
g__Paraprevotella	391.097	0.00377345	3108.4	0.00898335
g__Candidatus_Aphodomonas	387.324	0.00373704	2078.37	0.00600654
g__Anoxynatronum	385.906	0.00372336	1475.06	0.00426295
g__Wolbachia	384.964	0.00371428	11725.6	0.0338872
g__Eshraghiella	384.081	0.00370575	802.752	0.00231997
g__Schwartzia	383.503	0.00370018	1363.8	0.00394141
g__Kagunavirus	382.407	0.0036896	7.2542	2.096e-05
g__Nakamurella	381.167	0.00367764	5623.93	0.0162533
g__Yersinia	380.077	0.00366712	2364.42	0.00683321
g__Candidatus_Deferrimicrobium	379.261	0.00365925	22137.8	0.0639787
g__Luteolibacter	376.881	0.00363629	896.111	0.00258978
g__Candidatus_Onthenecus	375.591	0.00362384	2233.07	0.00645361
g__Longimicrobium	374.939	0.00361755	2059.31	0.00595146
g__Brachybacterium	374.203	0.00361045	365.122	0.00105521
g__Caldanaerobacter	373.709	0.00360568	1744.75	0.00504237
g__Pseudosporangium	367.104	0.00354195	349.351	0.00100963
g__Candidatus_Avirikenella	366.332	0.0035345	129301	0.373681
g__Fervidobacterium	362.812	0.00350054	3497.48	0.0101078
g__unclassified_f__Herelleviridae	361.994	0.00349265	2471.88	0.00714379
g__Schinkia	361.729	0.00349009	700.742	0.00202516
g__Succinivibrio	361.285	0.00348581	1563.23	0.00451776
g__Snodgrassella	361.203	0.00348502	1002.35	0.0028968
g__Mesotoga	360.855	0.00348166	1116.94	0.00322799
g__Neisseria	359.642	0.00346996	1562.02	0.00451427
g__Ilyobacter	358.169	0.00345574	1792.65	0.0051808
g__Orenia	357.895	0.0034531	1781.54	0.00514869
g__Salidesulfovibrio	357.653	0.00345076	4128.29	0.0119308
g__Candidatus_Scybalosoma	356.298	0.00343769	5471.1	0.0158116
g__Mucor	355.487	0.00342987	7418.25	0.0214389
g__Superficieibacter	353.59	0.00341156	103.405	0.00029884
g__unclassified_p__Candidatus_Kaiserbacteria	352.067	0.00339687	1404.51	0.00405907
g__Risungbinella	351.979	0.00339602	42.8248	0.00012376
g__Desulfamplus	351.954	0.00339578	1104.52	0.0031921
g__Aminicella	350.479	0.00338155	2329.54	0.00673243
g__Chlorobium	348.228	0.00335983	705.391	0.0020386
g__Stylonychia	347.811	0.00335581	381.298	0.00110196
g__Candidatus_Azobacteroides	347.079	0.00334874	5250.16	0.0151731
g__Dendrosporobacter	346.686	0.00334495	1038.92	0.00300249
g__Acetomicrobium	345.402	0.00333257	1375.62	0.00397558
g__Candidatus_Caccocola	343.652	0.00331568	849.774	0.00245587
g__Thermodesulfobacterium	343.088	0.00331024	709.971	0.00205183
g__unclassified_p__Candidatus_Parcubacteria	343.029	0.00330967	2617.01	0.00756322
g__Alkalicella	342.633	0.00330585	5579.69	0.0161254
g__Aestuariivirga	342.454	0.00330412	2673.47	0.00772638
g__Saccharibacillus	341.744	0.00329727	1117.91	0.00323079
g__Tetragenococcus	341.616	0.00329603	1768.8	0.00511187
g__Absidia	341.157	0.00329161	176.551	0.00051024
g__Desulfocucumis	339.266	0.00327336	1005.37	0.00290553
g__Commensalibacter	337.997	0.00326111	1346.96	0.00389274
g__Roseomonas	337.14	0.00325285	3204.91	0.00926225
g__Candidatus_Sulfotelmatobacter	336.154	0.00324334	5203.58	0.0150385
g__Candidatus_Merdiplasma	335.585	0.00323784	196.05	0.00056659
g__Galactobacillus	334.098	0.0032235	1090.57	0.00315178
g__Huintestinicola	332.424	0.00320735	844.434	0.00244043
g__Beograduvirus	330.968	0.0031933	1.0721	3.1e-06
g__Enterobacillus	329.437	0.00317853	801.979	0.00231774
g__Nitella	329.11	0.00317537	72.3577	0.00020912
g__Agrobacterium	327.885	0.00316356	3844.23	0.0111099
g__Sinorhizobium	326.653	0.00315166	8115.94	0.0234552
g__Chlorokybus	326.44	0.00314961	172.473	0.00049845
g__Comamonas	325.063	0.00313632	1264.45	0.0036543
g__Candidatus_Udaeobacter	323.906	0.00312516	3636.11	0.0105084
g__Fundicoccus	322.335	0.00311	1464.6	0.00423274
g__Candidatus_Electrothrix	320.134	0.00308877	2548.62	0.00736556
g__Absicoccus	319.877	0.00308628	2995.48	0.00865701
g__Holophaga	319.625	0.00308385	905.734	0.00261759
g__Pseudalkalibacillus	319.508	0.00308273	567.385	0.00163976
g__Candidatus_Odyssella	316.875	0.00305732	11654.6	0.0336819
g__Candidatus_Cryptobacteroides	316.839	0.00305698	5814.47	0.0168039
g__Gemella	316.093	0.00304978	1780.43	0.00514548
g__Brochothrix	314.906	0.00303833	183.256	0.00052961
g__unclassified_p__Candidatus_Bathyarchaeota	314.826	0.00303755	7130.23	0.0206065
g__Chryseolinea	312.303	0.00301322	519.171	0.00150041
g__unclassified_p__Candidatus_Moraniibacteriota	311.685	0.00300725	3011.38	0.00870294
g__Soehngenia	311.395	0.00300445	27411.1	0.0792185
g__Succinatimonas	310.914	0.00299981	1040.74	0.00300776
g__Gallalistipes	310.844	0.00299914	26013.5	0.0751796
g__Candidatus_Petromonas	309.081	0.00298213	2055.02	0.00593904
g__Paracholeplasma	308.21	0.00297372	723.705	0.00209152
g__Intestinibaculum	308.019	0.00297188	4104.5	0.0118621
g__Pseudoleptotrichia	307.717	0.00296897	993.935	0.00287249
g__Parasitella	307.552	0.00296738	3107.75	0.00898145
g__Mitsuokella	306.084	0.0029532	752.496	0.00217473
g__Denitratisoma	305.285	0.0029455	404.09	0.00116783
g__Roseateles	304.995	0.00294271	929.921	0.00268749
g__Acetitomaculum	304.746	0.0029403	289.807	0.00083755
g__Candidatus_Cacconaster	304.16	0.00293465	1666.43	0.00481603
g__Ectobacillus	303.377	0.00292709	573.558	0.0016576
g__Companilactobacillus	303.124	0.00292465	4222.03	0.0122018
g__Lacticaseibacillus	302.753	0.00292107	892.967	0.00258069
g__Candidatus_Fibrimonas	302.333	0.00291702	441.524	0.00127601
g__Paludibacterium	301.191	0.002906	220.698	0.00063782
g__Spirosoma	300.505	0.00289938	1668.65	0.00482242
g__Candidatus_Scubalenecus	299.118	0.002886	227.613	0.00065781
g__Megalodesulfovibrio	298.851	0.00288342	1486.15	0.004295
g__Jingyaoa	298.81	0.00288303	578.468	0.00167178
g__Geodermatophilus	297.678	0.0028721	1910.35	0.00552096
g__Acetonema	296.91	0.0028647	1232	0.00356049
g__Methylomonas	296.431	0.00286007	1544.02	0.00446226
g__Streptobacillus	296.248	0.00285831	1163.47	0.00336246
g__Herbaspirillum	294.374	0.00284023	841.773	0.00243274
g__Trichlorobacter	294.344	0.00283994	760.964	0.0021992
g__Salipaludibacillus	293.86	0.00283527	802.851	0.00232026
g__Candidatus_Competibacter	292.188	0.00281913	1050.49	0.00303594
g__Paracoccus	291.765	0.00281505	88983.5	0.257164
g__unclassified_p__Candidatus_Delongiibacteriota	291.222	0.00280981	1522.89	0.00440119
g__Allosphingosinicella	290.974	0.00280742	2238.33	0.00646882
g__Novosphingobium	290.965	0.00280733	6023.32	0.0174075
g__Desulfofarcimen	290.571	0.00280354	1731.78	0.00500487
g__Neopoerus	290.137	0.00279934	302.499	0.00087423
g__Nyctotherus	288.329	0.00278191	0	0
g__Candidatus_Heritagella	287.875	0.00277752	414.048	0.00119661
g__Nucisporomicrobium	287.144	0.00277047	290.209	0.00083871
g__Sulfuritalea	286.801	0.00276716	1646.41	0.00475815
g__unclassified_c__Thermoplasmata	286.69	0.00276609	4606.46	0.0133128
g__unclassified_p__Candidatus_Micrarchaeota	286.237	0.00276172	970.906	0.00280594
g__Shinella	285.021	0.00274999	2492.62	0.00720373
g__Dolichospermum	284.766	0.00274752	627.376	0.00181313
g__Enorma	284.396	0.00274396	946.61	0.00273572
g__Sphingobium	283.542	0.00273572	3012.4	0.00870589
g__Hornefia	281.995	0.00272079	2717.67	0.00785413
g__Candidatus_Dichloromethanomonas	280.333	0.00270476	339.3	0.00098059
g__Xylocopilactobacillus	280.171	0.0027032	22.9225	6.625e-05
g__Desulfopila	279.557	0.00269727	953.454	0.0027555
g__Candidatus_Symbiothrix	279.443	0.00269617	3442.15	0.0099479
g__Desulfarculus	279.128	0.00269313	1172.37	0.00338817
g__Heliobacterium	279.052	0.00269239	481.125	0.00139046
g__Anaerotalea	279.026	0.00269214	652.879	0.00188684
g__Candidatus_Onthosoma	278.918	0.0026911	9823.93	0.0283914
g__Enhygromyxa	278.702	0.00268902	321.743	0.00092985
g__Caldilinea	278.53	0.00268736	4534.14	0.0131038
g__Butyribacter	277.634	0.00267871	459.682	0.00132849
g__Humibacillus	277.296	0.00267545	913.099	0.00263887
g__Polynucleobacter	277.046	0.00267304	1672.71	0.00483416
g__Sulfurimonas	275.481	0.00265794	2098.13	0.00606364
g__Fictibacillus	275.238	0.0026556	861.626	0.00249012
g__Candidatus_Avacidaminococcus	274.957	0.00265289	399.567	0.00115476
g__Syntrophobacter	272.867	0.00263272	904.266	0.00261335
g__Synechococcus	271.244	0.00261706	1206.52	0.00348688
g__unclassified_p__Candidatus_Bipolaricaulota	271.244	0.00261706	1552.25	0.00448604
g__Hanamia	270.546	0.00261033	1224.39	0.0035385
g__Vreelandella	269.235	0.00259768	536.657	0.00155095
g__Thermotoga	267.54	0.00258132	400.757	0.0011582
g__Streptosporangium	267.507	0.00258101	919.448	0.00265723
g__Budvicia	266.909	0.00257523	395.791	0.00114384
g__Nitrosarchaeum	266.108	0.0025675	461.178	0.00133281
g__Janthinobacterium	264.605	0.002553	1030.11	0.00297704
g__Smithella	264.579	0.00255276	1262.79	0.00364948
g__Domibacillus	263.954	0.00254673	499.565	0.00144375
g__Sutterella	263.466	0.00254202	1478.57	0.00427309
g__Desulfogranum	263.433	0.00254169	1103.26	0.00318845
g__Pyrenophora	262.792	0.00253551	53.0402	0.00015329
g__Gemmobacter	262.596	0.00253363	1645.46	0.00475541
g__Capsaspora	262.491	0.00253261	6772.91	0.0195739
g__Rossellomorea	260.609	0.00251445	676.677	0.00195561
g__Persephonella	259.488	0.00250364	382.644	0.00110585
g__Desulfofustis	259.139	0.00250027	2010.23	0.00580962
g__Rhodanobacter	258.851	0.00249748	1298.07	0.00375145
g__Plenodomus	258.5	0.0024941	7.6683	2.216e-05
g__Cycloclasticus	258.386	0.002493	206.295	0.0005962
g__Caldifermentibacillus	258.187	0.00249108	220.719	0.00063788
g__Dactylosporangium	257.953	0.00248883	1046.61	0.00302471
g__Nitrososphaera	257.703	0.00248642	1930.96	0.00558052
g__Sneathia	257.639	0.0024858	763.71	0.00220714
g__Paucidesulfovibrio	257.404	0.00248353	562.692	0.00162619
g__Calorimonas	257.219	0.00248174	1068.63	0.00308837
g__Hymenobacter	256.969	0.00247933	1520.43	0.00439408
g__Lactiplantibacillus	256.785	0.00247756	545.617	0.00157684
g__Polaromonas	256.78	0.0024775	1324.56	0.003828
g__Sporotomaculum	256.307	0.00247294	327.236	0.00094572
g__Thermosipho	255.024	0.00246056	1810.64	0.0052328
g__Ignatzschineria	254.771	0.00245812	66.4551	0.00019206
g__Winogradskya	254.414	0.00245468	272.893	0.00078867
g__Hominifimenecus	253.934	0.00245005	1353.87	0.00391272
g__unclassified_p__Candidatus_Margulisiibacteriota	253.061	0.00244163	1958.48	0.00566006
g__Serpentinicella	253.054	0.00244155	2747.53	0.00794042
g__Rhizomicrobium	252.697	0.00243811	5480.5	0.0158388
g__Deinococcus	252.232	0.00243363	1011.04	0.00292194
g__Rhodovulum	251.75	0.00242898	10337	0.0298742
g__Usitatibacter	250.079	0.00241285	1778.61	0.00514023
g__Leadbettera	250.011	0.0024122	547.001	0.00158084
g__Patulibacter	249.937	0.00241148	3869.27	0.0111823
g__Alkalihalobacillus	248.774	0.00240026	929.091	0.00268509
g__Sangeribacter	248.719	0.00239973	1354.2	0.00391367
g__Aminomonas	248.706	0.00239961	16271.9	0.047026
g__Phenylobacterium	248.573	0.00239833	2533.94	0.00732314
g__Roseovarius	248.52	0.00239781	9764.18	0.0282187
g__Cohaesibacter	246.804	0.00238125	2835.15	0.00819364
g__Gordonia	246.691	0.00238017	21490.2	0.0621073
g__Candidatus_Methanofilum	245.759	0.00237118	232.559	0.0006721
g__Candidatus_Contendobacter	244.942	0.00236329	1812.03	0.0052368
g__Dechloromonas	243.174	0.00234623	1166.91	0.00337241
g__Oceanivirga	243.169	0.00234618	96.5484	0.00027903
g__unclassified_p__Candidatus_Walliibacteriota	242.876	0.00234336	488.888	0.0014129
g__Psychroserpens	240.86	0.0023239	313.755	0.00090676
g__Bombiscardovia	239.956	0.00231518	53.1255	0.00015353
g__Nodularia	238.951	0.00230548	95.7282	0.00027666
g__Azonexus	238.172	0.00229797	1439.91	0.00416137
g__Methanoculleus	237.013	0.00228679	2185.03	0.00631479
g__Laribacter	236.399	0.00228086	602.929	0.00174248
g__Dehalococcoides	236.273	0.00227965	690.959	0.00199689
g__Pragia	235.717	0.00227428	916.993	0.00265013
g__Saccharothrix	235.237	0.00226965	1797.93	0.00519605
g__Desulfotruncus	234.785	0.00226529	1209.22	0.00349468
g__Caenorhabditis	234.698	0.00226445	0	0
g__Muriventricola	233.928	0.00225702	365.855	0.00105733
g__Candidatus_Alectryocaccomicrobium	233.195	0.00224995	2068.04	0.00597667
g__Desulfoplanes	232.931	0.00224741	948.493	0.00274116
g__Candidatus_Avichristensenella	232.807	0.00224621	1479.68	0.00427631
g__Krasilnikovia	232.358	0.00224187	302.824	0.00087517
g__Albitalea	230.965	0.00222844	161.849	0.00046775
g__Chlamydia	230.596	0.00222487	37781.8	0.10919
g__Candidatus_Brocadia	230.443	0.0022234	368.847	0.00106598
g__unclassified_p__candidate_division_WOR-3	230.345	0.00222245	2390.27	0.00690794
g__Bauldia	230.139	0.00222046	21270	0.0614707
g__Viridibacillus	229.608	0.00221535	597.391	0.00172647
g__Murdochiella	228.668	0.00220627	339.007	0.00097974
g__Tahibacter	228.146	0.00220124	261.568	0.00075594
g__Desulfoluna	227.96	0.00219944	854.022	0.00246814
g__Methyloversatilis	227.647	0.00219642	1184.13	0.00342216
g__Lentzea	227.001	0.00219019	15339.2	0.0443307
g__Alteromonas	226.905	0.00218926	714.709	0.00206552
g__Aureimonas	225.858	0.00217916	2435.97	0.00704
g__Caballeronia	224.272	0.00216385	1448.91	0.00418738
g__Thermotalea	224.082	0.00216202	1217.81	0.00351951
g__Alkalidesulfovibrio	223.917	0.00216044	2231.58	0.00644933
g__Paucisalibacillus	223.855	0.00215984	302.011	0.00087282
g__unclassified_f__Methanomethylophilaceae	223.233	0.00215383	849.067	0.00245382
g__Pseudoramibacter	222.689	0.00214859	477.691	0.00138054
g__Casaltella	222.516	0.00214691	358.938	0.00103734
g__Candidatus_Endomicrobiellum	222.513	0.00214689	3560.7	0.0102905
g__Dhillonvirus	222.112	0.00214302	0	0
g__Ruminobacter	222.06	0.00214251	95.0182	0.0002746
g__Candidatus_Nardonella	221.322	0.0021354	3.575	1.033e-05
g__Umezawaea	221.203	0.00213425	778.238	0.00224912
g__Alkalihalobacterium	220.87	0.00213103	913.52	0.00264009
g__Planomonospora	220.515	0.00212761	322.64	0.00093244
g__Rhodospirillum	220.041	0.00212304	1839.71	0.00531681
g__Actinopolymorpha	219.397	0.00211682	696.535	0.002013
g__Candidatus_Nephrothrix	219.013	0.00211312	73.4819	0.00021236
g__Candidatus_Aphodovivens	218.988	0.00211288	811.956	0.00234657
g__Xenorhabdus	218.943	0.00211244	1629	0.00470785
g__Anaerobiospirillum	218.932	0.00211234	1517.15	0.00438459
g__unclassified_p__Candidatus_Auribacterota	218.306	0.0021063	906.11	0.00261868
g__unclassified_p__Candidatus_Falkowbacteria	218.268	0.00210593	1279.58	0.003698
g__Draconibacterium	217.901	0.00210239	3638.3	0.0105148
g__Ensifer	217.073	0.0020944	4461.76	0.0128946
g__Granulicatella	216.2	0.00208597	2115.06	0.00611257
g__Candidatus_Scalindua	215.647	0.00208064	2688.97	0.00777118
g__Candidatus_Scatousia	215.343	0.0020777	219.532	0.00063445
g__Anaeromyxobacter	215.237	0.00207668	1982.89	0.00573061
g__Candidatus_Ruminimicrobiellum	215.187	0.0020762	648.454	0.00187405
g__Desulfohalovibrio	214.372	0.00206834	3760.2	0.010867
g__Jiangella	214.062	0.00206535	1010.21	0.00291953
g__Desulfobacterium	213.854	0.00206334	1595.41	0.00461076
g__Desulfosediminicola	213.341	0.00205839	717.107	0.00207245
g__Jatrophihabitans	212.663	0.00205185	1247.23	0.00360453
g__Hujiaoplasma	212.508	0.00205036	1123.94	0.00324822
g__Candidatus_Stercoripulliclostridium	212.214	0.00204752	1767.93	0.00510935
g__Leptospira	211.901	0.0020445	1826.83	0.00527958
g__Phycomyces	211.234	0.00203806	263.633	0.0007619
g__Virgisporangium	210.614	0.00203208	837.531	0.00242048
g__Candidatus_Contubernalis	210.235	0.00202842	426.753	0.00123333
g__Methylorubrum	208.433	0.00201103	535.847	0.00154861
g__Anaerobranca	208.233	0.0020091	3727.45	0.0107724
g__Candidatus_Coproplasma	207.3	0.00200011	1674.63	0.00483972
g__Parasutterella	206.898	0.00199623	538.074	0.00155505
g__Alphabaculovirus	206.885	0.0019961	169.265	0.00048918
g__Shumkonia	205.205	0.00197989	1303.5	0.00376714
g__Gongronella	205.204	0.00197988	134.569	0.00038891
g__Microcoleus	204.913	0.00197707	844.03	0.00243926
g__Nostocoides	204.73	0.00197531	1298.81	0.0037536
g__Xylanibacter	204.317	0.00197132	2415.28	0.0069802
g__Lapillicoccus	203.966	0.00196794	1438.34	0.00415685
g__Calothrix	203.829	0.00196662	378.007	0.00109245
g__Terracidiphilus	203.374	0.00196223	1284.26	0.00371154
g__Candidatus_Gallitreponema	203.2	0.00196055	316.415	0.00091445
g__Selenihalanaerobacter	202.555	0.00195432	147.057	0.000425
g__Candidatus_Excrementavichristensenella	202.111	0.00195004	4683.8	0.0135363
g__Cucumispora	201.486	0.00194401	111473	0.322159
g__Eggerthia	201.312	0.00194233	348.803	0.00100805
g__Rubrivivax	201.282	0.00194205	2528.91	0.0073086
g__Dyella	200.784	0.00193723	831.885	0.00240417
g__Aquihabitans	200.72	0.00193661	6304.94	0.0182214
g__Haloplasma	200.363	0.00193317	1248.63	0.00360857
g__Pilimelia	200.072	0.00193037	1034.5	0.00298974
g__Propionicimonas	199.379	0.00192368	1495.38	0.00432169
g__Vermiphilus	199.171	0.00192167	0	0
g__Dermatobacter	198.998	0.00192	13208.4	0.0381726
g__Phlebovirus	198.381	0.00191405	0	0
g__Syntrophorhabdus	198.037	0.00191073	2868.26	0.00828934
g__Phytobacter	197.887	0.00190928	73.0007	0.00021097
g__Thalassospira	197.74	0.00190787	3793.92	0.0109645
g__Neofamilia	197.178	0.00190245	90.3351	0.00026107
g__Desulfuribacillus	196.637	0.00189723	1425.65	0.00412017
g__Sporolituus	196.446	0.00189538	407.043	0.00117636
g__Herbivorax	196.159	0.00189261	607.334	0.00175521
g__Aquicella	195.789	0.00188905	74.2023	0.00021445
g__Atlantibacter	195.744	0.00188861	49.5647	0.00014324
g__Kineosporia	195.681	0.001888	1190.94	0.00344186
g__Algoriphagus	195.658	0.00188778	1166.77	0.00337199
g__Aedoeadaptatus	195.277	0.0018841	2046.43	0.00591422
g__unclassified_p__Candidatus_Tectimicrobiota	195.235	0.0018837	2520.36	0.0072839
g__Modicisalibacter	195.018	0.00188161	266.273	0.00076953
g__Phytohabitans	194.963	0.00188107	1158.57	0.0033483
g__Enterovirga	194.904	0.0018805	1198.54	0.00346381
g__Terrabacter	194.758	0.0018791	698.952	0.00201999
g__Peloplasma	194.628	0.00187784	292.859	0.00084637
g__Porcincola	194.317	0.00187484	473.361	0.00136802
g__Fervidicella	194.021	0.00187199	2626.48	0.00759058
g__Stutzerimonas	193.346	0.00186548	2086.89	0.00603115
g__unclassified_f__Methanocalculaceae	192.856	0.00186074	7.3679	2.129e-05
g__Pelobacter	191.979	0.00185228	636.978	0.00184088
g__Batrachochytrium	189.869	0.00183192	396.731	0.00114656
g__Atopobium	189.809	0.00183135	1108.07	0.00320235
g__Chloracidobacterium	189.599	0.00182932	376.286	0.00108747
g__Duganella	188.775	0.00182137	207.673	0.00060018
g__Jeongeupia	188.682	0.00182047	344.337	0.00099514
g__Pseudescherichia	188.341	0.00181718	278.29	0.00080426
g__Asanoa	188.049	0.00181437	1569.91	0.00453708
g__Glycomyces	187.778	0.00181175	545.801	0.00157738
g__Oryzibacter	187.554	0.00180959	101.744	0.00029404
g__Aeriscardovia	187.403	0.00180813	1275.07	0.00368497
g__Ornithinibacillus	187.357	0.00180769	813.288	0.00235042
g__Leptolyngbya	187.19	0.00180607	686.088	0.00198281
g__Actinobacillus	186.853	0.00180283	493.527	0.0014263
g__Colwellia	186.402	0.00179847	4105.57	0.0118652
g__Methanospirillum	186.225	0.00179676	477.028	0.00137862
g__Caedimonas	186.111	0.00179566	6973.9	0.0201547
g__Methanohalophilus	186.102	0.00179558	43.0818	0.00012451
g__Criibacterium	185.683	0.00179154	989.466	0.00285958
g__Podila	185.152	0.00178641	939.765	0.00271594
g__Haloactinomyces	184.608	0.00178117	35.1102	0.00010147
g__Desulfotignum	184.481	0.00177994	763.308	0.00220598
g__Aurantimonas	184.392	0.00177908	4256.43	0.0123012
g__Leifsonia	184.291	0.0017781	469.029	0.0013555
g__Vogesella	184.281	0.00177801	424.244	0.00122607
g__Fusarium	183.713	0.00177253	327.371	0.00094611
g__Plesiomonas	183.084	0.00176646	225581	0.651934
g__Anaeroplasma	183.004	0.00176568	2696.27	0.00779229
g__Modestobacter	182.383	0.0017597	860.319	0.00248634
g__unclassified_c__Candidatus_Krumholzibacteriia	181.692	0.00175303	1520.2	0.00439342
g__Thiocapsa	181.558	0.00175173	2157	0.00623376
g__Frankia	180.663	0.0017431	3980.85	0.0115047
g__Heliophilum	180.465	0.00174119	197.537	0.00057089
g__Porodaedalea	180.427	0.00174083	0	0
g__Elizabethkingia	180.26	0.00173921	19555.2	0.056515
g__Candidatus_Scatonaster	179.45	0.0017314	164.373	0.00047504
g__Tindallia	179.153	0.00172853	2066.95	0.00597352
g__Aquabacterium	178.681	0.00172398	1003.07	0.0028989
g__Flammeovirga	178.638	0.00172357	1043.6	0.00301604
g__Hannaella	178.585	0.00172306	0	0
g__Candidatus_Ornithospirochaeta	178.371	0.00172098	721.321	0.00208463
g__Ignavibacterium	178.244	0.00171976	545.751	0.00157723
g__Phormidesmis	178.214	0.00171947	264.332	0.00076392
g__Aureispira	178.05	0.00171789	493.492	0.0014262
g__Marivirga	177.74	0.0017149	255.589	0.00073866
g__Chelonobacter	177.635	0.00171389	23.2775	6.727e-05
g__Phaeodactylibacter	177.402	0.00171164	1090.32	0.00315105
g__Robertmurraya	177.299	0.00171065	1714.46	0.00495483
g__Thermovenabulum	177.209	0.00170977	771.427	0.00222944
g__Plantactinospora	176.613	0.00170403	647.415	0.00187104
g__Ammoniphilus	176.568	0.00170359	630.538	0.00182227
g__Macrococcus	175.869	0.00169684	730.521	0.00211122
g__Candidatus_Nucleicultrix	175.755	0.00169575	5780.74	0.0167065
g__Actinokineospora	175.524	0.00169352	1006.95	0.00291011
g__Parageobacillus	175.405	0.00169238	1136.94	0.00328577
g__Thermoflavimicrobium	174.574	0.00168435	50.4367	0.00014576
g__Hydrogenophaga	174.56	0.00168422	696.441	0.00201273
g__Fredinandcohnia	174.232	0.00168105	635.818	0.00183753
g__Zophobihabitans	174.126	0.00168003	132.297	0.00038234
g__Coprothermobacter	173.619	0.00167514	718.259	0.00207578
g__Bilifractor	173.584	0.0016748	806.444	0.00233064
g__Actinotalea	173.351	0.00167256	935.039	0.00270228
g__Candidatus_Parendomicrobium	173.3	0.00167206	319.166	0.0009224
g__Bacteriovorax	173.047	0.00166962	546.887	0.00158052
g__Dentiscutata	172.964	0.00166882	308.259	0.00089087
g__Prescottella	172.432	0.00166368	15928.2	0.0460328
g__Sulfitobacter	171.669	0.00165632	15880.8	0.0458957
g__Gottfriedia	171.436	0.00165407	1276.54	0.00368922
g__Carboxylicivirga	171.421	0.00165394	3970.25	0.0114741
g__Photorhabdus	171.355	0.0016533	392.565	0.00113452
g__Methylibium	171.219	0.00165198	597.518	0.00172684
g__Desulforhopalus	170.981	0.00164968	1051.35	0.00303843
g__unclassified_p__Candidatus_Peregrinibacteria	170.244	0.00164258	1676.46	0.004845
g__Candidatus_Methylomirabilis	169.656	0.0016369	3010.48	0.00870035
g__Peronospora	169.475	0.00163516	93.8203	0.00027114
g__Marinobacter	169.442	0.00163484	3013.9	0.00871024
g__Candidatus_Equinaster	169.434	0.00163476	359.489	0.00103893
g__Zobellia	169.318	0.00163365	260.8	0.00075372
g__Candidatus_Moduliflexus	168.956	0.00163015	602.255	0.00174053
g__Heliorestis	168.84	0.00162903	673.76	0.00194718
g__Corynebacterium	168.817	0.00162881	1114.21	0.00322009
g__Parasphaerochaeta	168.789	0.00162854	396.663	0.00114636
g__Candidatus_Kentron	168.55	0.00162623	1388.38	0.00401246
g__Citroniella	167.665	0.0016177	63.8766	0.0001846
g__Acididesulfobacillus	167.61	0.00161716	199.065	0.0005753
g__Micavibrio	167.608	0.00161714	8151.98	0.0235594
g__Hyphomonas	167.553	0.00161661	3419.63	0.00988282
g__Archangium	166.963	0.00161092	1097.98	0.00317319
g__Desulfobacula	166.678	0.00160816	1449.71	0.00418968
g__Sulfurospirillum	166.616	0.00160757	522.601	0.00151033
g__Candidatus_Gallibacteroides	166.135	0.00160293	4620.86	0.0133544
g__Saccharopolyspora	165.6	0.00159777	1207.35	0.00348926
g__Ileibacterium	165.542	0.00159721	3187.56	0.00921212
g__Bartonella	165.292	0.00159479	3539	0.0102278
g__Bipolaris	165.289	0.00159477	3.7219	1.076e-05
g__Paraconexibacter	164.899	0.001591	2994.2	0.00865332
g__Kouleothrix	164.779	0.00158984	443.152	0.00128072
g__Noviherbaspirillum	164.66	0.0015887	1137.2	0.00328654
g__Halobacteriovorax	164.591	0.00158803	670.292	0.00193716
g__Leucocoprinus	164.548	0.00158762	1158.12	0.003347
g__Thermobacillus	164.329	0.00158551	398.877	0.00115276
g__Skermanella	164.177	0.00158404	1951.92	0.00564108
g__Alkalihalophilus	164.007	0.0015824	515.675	0.00149031
g__Rhodopirellula	163.66	0.00157905	7853.27	0.0226961
g__Trichormus	163.554	0.00157803	42.9451	0.00012411
g__Pelagibius	163.174	0.00157436	6572.84	0.0189956
g__Acidovorax	161.994	0.00156298	1033.06	0.00298555
g__Pleionea	161.624	0.0015594	521.429	0.00150694
g__Tolypothrix	160.92	0.00155262	138.165	0.0003993
g__Sphingopyxis	160.499	0.00154856	2255.58	0.00651866
g__Anoxybacter	160.397	0.00154757	332.011	0.00095952
g__Gallibacter	160.388	0.00154748	1523.33	0.00440247
g__Thermobrachium	160.232	0.00154597	2124.64	0.00614026
g__Thermodesulfovibrio	159.978	0.00154353	2111.77	0.00610307
g__Nitellopsis	159.96	0.00154335	77.8091	0.00022487
g__Brevundimonas	159.474	0.00153866	2174.7	0.00628494
g__Puia	159.29	0.00153688	3191.91	0.00922468
g__Cryptobacterium	159.024	0.00153432	88.2486	0.00025504
g__Candidatus_Avisuccinivibrio	158.971	0.00153381	584.588	0.00168947
g__Natranaerofaba	158.761	0.00153179	307.043	0.00088736
g__Mycoplasmopsis	158.061	0.00152503	2849.84	0.00823608
g__Thiobacillus	157.882	0.0015233	599.775	0.00173336
g__Candidatus_Limousia	157.72	0.00152174	454.57	0.00131372
g__Nitratireductor	157.562	0.00152021	113816	0.32893
g__Desulfobotulus	157.511	0.00151973	408.515	0.00118062
g__Actinomarinicola	157.487	0.00151949	4792.77	0.0138512
g__Candidatus_Avilachnospira	157.354	0.00151821	187.834	0.00054284
g__Paraliobacillus	157.166	0.00151639	878.285	0.00253826
g__Oligella	157.129	0.00151604	83.2078	0.00024047
g__Sulfurihydrogenibium	156.952	0.00151432	1283.03	0.00370798
g__Geoalkalibacter	156.857	0.00151342	517.822	0.00149652
g__Pediococcus	156.697	0.00151187	920.364	0.00265987
g__Pontibacillus	156.373	0.00150875	676.217	0.00195428
g__Polaribacter	156.135	0.00150645	1497.76	0.00432857
g__Ammonifex	156.076	0.00150588	179.436	0.00051857
g__Duodenibacillus	155.928	0.00150445	423.007	0.0012225
g__Candidatus_Cloacimonas	155.774	0.00150296	500.865	0.00144751
g__Ornithinicoccus	155.45	0.00149984	161.022	0.00046536
g__Edaphobacter	154.821	0.00149377	701.875	0.00202843
g__Trebonia	154.817	0.00149373	2586.5	0.00747503
g__Hominicoprocola	153.857	0.00148446	1148.06	0.00331792
g__Jonquetella	153.434	0.00148039	1606.06	0.00464154
g__unclassified_c__Alphaproteobacteria	153.409	0.00148014	1638.12	0.00473419
g__Marinospirillum	153.212	0.00147825	118.599	0.00034275
g__Alloscardovia	153.203	0.00147816	293.778	0.00084902
g__Thermovirga	152.84	0.00147466	1526.81	0.0044125
g__unclassified_o__Methanosarcinales	152.813	0.00147439	886.785	0.00256283
g__Pseudoxanthomonas	152.717	0.00147347	640.196	0.00185018
g__Lentibacillus	152.688	0.00147319	1587.42	0.00458767
g__Microcella	152.676	0.00147307	167.422	0.00048385
g__Desulfofalx	152.161	0.00146811	747.765	0.00216106
g__Methylophaga	151.747	0.00146411	464.839	0.0013434
g__Pontibacter	151.744	0.00146408	2367.76	0.00684288
g__Chelativorans	151.67	0.00146337	6014.56	0.0173822
g__Runella	151.047	0.00145735	416.456	0.00120357
g__Labilithrix	150.444	0.00145154	1160.02	0.00335249
g__Defluviitoga	150.305	0.0014502	211.827	0.00061219
g__Planktothrix	150.173	0.00144893	503.786	0.00145595
g__Limihaloglobus	149.019	0.00143779	205.088	0.00059271
g__Alloprevotella	148.864	0.00143629	879.495	0.00254176
g__Microbispora	148.8	0.00143568	621.021	0.00179476
g__Extensimonas	148.768	0.00143537	162.054	0.00046834
g__Cronobacter	148.633	0.00143407	981.648	0.00283698
g__Dictyoglomus	148.495	0.00143273	353.198	0.00102075
g__unclassified_p__Candidatus_Aerophobetes	148.303	0.00143088	3324.21	0.00960704
g__Candidatus_Nitrosotalea	147.907	0.00142706	446.638	0.00129079
g__Candidatus_Methanofastidiosum	147.889	0.00142689	520.815	0.00150517
g__Microbulbifer	147.849	0.0014265	43582	0.125953
g__Tepidibacillus	147.298	0.00142119	616.294	0.0017811
g__Taurinivorans	147.043	0.00141873	345.367	0.00099812
g__Pectobacterium	146.576	0.00141422	1519.9	0.00439254
g__Planomicrobium	146.573	0.00141419	127.18	0.00036755
g__Candidatus_Protochlamydia	145.86	0.00140731	1226.67	0.00354511
g__Candidatus_Avigastranaerophilus	145.771	0.00140645	296.823	0.00085782
g__Psychrilyobacter	145.234	0.00140127	1746.54	0.00504753
g__Numidum	145.143	0.00140039	28.49	8.234e-05
g__Parachlamydia	145.078	0.00139976	5210.05	0.0150572
g__Moneuplotes	144.785	0.00139694	591.644	0.00170986
g__Rhodopseudomonas	144.747	0.00139657	4560.7	0.0131805
g__Candidatus_Copronaster	144.333	0.00139257	461.41	0.00133349
g__Delftia	144.168	0.00139098	414.065	0.00119666
g__Neoconidiobolus	143.942	0.0013888	179.887	0.00051988
g__Moritella	143.687	0.00138635	1179	0.00340732
g__unclassified_c__Candidatus_Saccharimonadia	143.662	0.0013861	2827.79	0.00817237
g__Chengkuizengella	143.654	0.00138602	371.867	0.0010747
g__Neocallimastix	143.451	0.00138407	972.516	0.00281059
g__Phosphitispora	142.852	0.00137829	861.311	0.00248921
g__Gimesia	142.674	0.00137657	4130.26	0.0119365
g__Caldibacillus	142.406	0.00137398	608.759	0.00175933
g__Isoptericola	142.391	0.00137384	2550.8	0.00737186
g__Glaciibacter	142.349	0.00137343	155.857	0.00045043
g__Neolewinella	142.164	0.00137165	367.613	0.00106241
g__Aquitalea	141.999	0.00137006	171.274	0.00049498
g__Kosmotoga	141.953	0.00136961	248.775	0.00071896
g__Oryzihumus	141.798	0.00136812	197.846	0.00057178
g__Pseudanabaena	141.387	0.00136415	815.145	0.00235579
g__Gallionella	141.258	0.0013629	1599.79	0.00462341
g__unclassified_f__Pasteurellaceae	141.003	0.00136045	86.088	0.0002488
g__Rubellicoccus	140.913	0.00135958	209.722	0.0006061
g__unclassified_f__Candidatus_Binataceae	140.841	0.00135888	3245.23	0.0093788
g__Methanothrix	140.801	0.0013585	812.107	0.00234701
g__Candidatus_Hennigella	140.784	0.00135833	2981.48	0.00861654
g__Candidatus_Colivicinus	140.726	0.00135777	4286.87	0.0123891
g__Chitiniphilus	140.592	0.00135648	598.868	0.00173074
g__Lichtheimia	140.433	0.00135494	286.286	0.00082737
g__Desulfomonile	140.376	0.0013544	976.543	0.00282223
g__Miltoncostaea	140.019	0.00135095	2750.63	0.00794937
g__unclassified_p__Candidatus_Woesebacteria	139.81	0.00134893	587.994	0.00169932
g__Iocasia	139.755	0.00134841	440.264	0.00127237
g__Desulfatiglans	139.321	0.00134422	933.308	0.00269728
g__Ectothiorhodospira	139.115	0.00134223	646.292	0.0018678
g__Pseudorhodobacter	138.867	0.00133984	928.64	0.00268379
g__Parapedobacter	138.753	0.00133874	1331.98	0.00384945
g__Cardiobacterium	138.675	0.00133799	29.5815	8.549e-05
g__Candidatus_Oleimmundimicrobium	138.637	0.00133762	291.495	0.00084243
g__Rhodomicrobium	137.069	0.00132249	11000.9	0.0317928
g__Microcystis	136.959	0.00132143	845.946	0.0024448
g__Paraphoma	136.698	0.00131891	0	0
g__Hypnocyclicus	136.668	0.00131862	1291.94	0.00373372
g__unclassified_f__Adintoviridae	136.377	0.00131581	3343.41	0.00966254
g__Pseudoduganella	135.645	0.00130875	433.536	0.00125293
g__Pilibacter	135.055	0.00130306	372.916	0.00107774
g__Cedecea	134.953	0.00130208	32.1305	9.286e-05
g__Brenneria	134.484	0.00129756	2839.27	0.00820556
g__Thermacetogenium	134.393	0.00129667	1021.97	0.0029535
g__Allisonella	134.337	0.00129613	50.481	0.00014589
g__Fodinicurvata	134.147	0.0012943	1279.26	0.0036971
g__Mycoplana	133.951	0.00129241	2294.37	0.00663077
g__Aminithiophilus	133.893	0.00129185	1660.12	0.00479777
g__Caecibacteroides	132.899	0.00128226	381.061	0.00110127
g__Candidatus_Avanaerovorax	132.49	0.00127831	1828.97	0.00528575
g__Prosthecobacter	132.4	0.00127744	844.807	0.00244151
g__Corallococcus	132.379	0.00127724	2285.72	0.00660577
g__Dehalogenimonas	132.226	0.00127576	396.477	0.00114583
g__Desulforegula	132.208	0.00127559	212.246	0.00061339
g__Flavitalea	131.871	0.00127234	734.983	0.00212412
g__Candidatus_Arthromitus	131.795	0.00127161	480.296	0.00138806
g__Thermaerobacter	131.196	0.00126583	277.065	0.00080072
g__Dichotomocladium	131.141	0.0012653	195.677	0.00056551
g__Rubeoparvulum	131.034	0.00126427	176.183	0.00050917
g__Desulfococcus	130.602	0.0012601	370.663	0.00107122
g__Lyngbya	130.236	0.00125657	253.603	0.00073292
g__Parastagonospora	130.197	0.00125619	22.4996	6.502e-05
g__Dickeya	129.794	0.0012523	467.151	0.00135008
g__Pimelobacter	129.54	0.00124985	221.594	0.00064041
g__Ambispora	129.357	0.00124808	3122.07	0.00902285
g__Phyllobacterium	129.214	0.0012467	2858.65	0.00826155
g__Psychrobacter	129.01	0.00124474	999.732	0.00288925
g__Candidatus_Entotheonella	128.989	0.00124453	3495.94	0.0101033
g__Turicimonas	128.771	0.00124243	913.386	0.00263971
g__Salirhabdus	128.707	0.00124181	740.481	0.00214001
g__Cellulophaga	128.583	0.00124062	355.816	0.00102832
g__Pseudogracilibacillus	128.336	0.00123823	1383.13	0.00399728
g__Acidiphilium	128.285	0.00123774	1867.79	0.00539795
g__Methanofollis	128.279	0.00123769	92.3445	0.00026688
g__Rufibacter	127.933	0.00123435	812.562	0.00234832
g__unclassified_o__Nostocales	127.913	0.00123415	286.768	0.00082876
g__Keratinibaculum	127.384	0.00122904	947.774	0.00273909
g__Curvibacter	126.751	0.00122294	485.347	0.00140266
g__Candidatus_Syntrophopropionicum	126.604	0.00122152	94.7421	0.00027381
g__Candidatus_Sabulitectum	126.525	0.00122076	195.648	0.00056543
g__Mammaliicoccus	126.341	0.00121898	508.81	0.00147047
g__Candidatus_Apopatocola	126.197	0.0012176	67.4676	0.00019498
g__Lapidilactobacillus	126.162	0.00121725	48.7427	0.00014087
g__Thermodesulfomicrobium	125.823	0.00121398	368.2	0.0010641
g__Pleomorphomonas	125.588	0.00121172	1470.87	0.00425084
g__Pedosphaera	125.533	0.00121119	1190.22	0.00343976
g__Diaphorobacter	125.49	0.00121077	529.824	0.0015312
g__Kitasatospora	125.274	0.00120868	928.399	0.00268309
g__Koleobacter	124.729	0.00120343	649.053	0.00187578
g__Candidatus_Alectryocaccobium	124.483	0.00120106	3640	0.0105197
g__Blepharisma	123.99	0.0011963	313.622	0.00090637
g__Elusimicrobium	123.989	0.00119629	350.938	0.00101422
g__Marispirochaeta	123.642	0.00119294	1117.63	0.00322998
g__Catellatospora	123.114	0.00118785	407.075	0.00117646
g__Thermosynergistes	123.001	0.00118676	618.722	0.00178812
g__Candidatus_Paracaedimonas	122.709	0.00118394	6508.98	0.0188111
g__Candidatus_Babela	122.383	0.00118079	0	0
g__Hoylesella	122.079	0.00117786	1440.02	0.00416169
g__Asticcacaulis	122.039	0.00117748	1049.55	0.00303322
g__Methylocaldum	121.934	0.00117646	240.784	0.00069587
g__Plasticicumulans	121.019	0.00116764	339.944	0.00098245
g__Abiotrophia	120.849	0.00116599	98.0948	0.0002835
g__Thiohalocapsa	120.701	0.00116457	3602.46	0.0104112
g__Kocuria	120.528	0.0011629	235.059	0.00067933
g__Niabella	120.514	0.00116276	1670.65	0.0048282
g__Desulfonatronovibrio	120.3	0.0011607	480.786	0.00138948
g__Pseudemcibacter	120.116	0.00115892	176.917	0.0005113
g__Maribellus	120.04	0.00115819	1784.77	0.00515803
g__Chthonobacter	119.847	0.00115633	235.917	0.00068181
g__Halolactibacillus	119.417	0.00115218	352.77	0.00101951
g__Desulfallas	119.357	0.0011516	539.62	0.00155951
g__Candidatus_Aadella	119.266	0.00115072	1.4249	4.12e-06
g__Candidatus_Siliceabacter	119.245	0.00115052	3060.41	0.00884465
g__Facklamia	118.915	0.00114734	50.8754	0.00014703
g__unclassified_f__Methanosarcinaceae	118.754	0.00114578	318.586	0.00092072
g__Lamprobacter	118.234	0.00114076	789.721	0.00228231
g__Phaeovibrio	118.141	0.00113987	465.632	0.00134569
g__Emticicia	118.112	0.00113959	810.757	0.00234311
g__Collimonas	118.072	0.0011392	979.039	0.00282944
g__Xylophilus	117.256	0.00113133	73.4802	0.00021236
g__Cutibacterium	117.116	0.00112998	412.48	0.00119207
g__Haliscomenobacter	117.093	0.00112976	315.74	0.0009125
g__Stagonospora	116.466	0.0011237	0	0
g__Thermospira	116.44	0.00112345	338.273	0.00097762
g__Haploplasma	116.224	0.00112137	502.618	0.00145258
g__Globisporangium	116.089	0.00112007	411.938	0.00119051
g__Rectinema	116.031	0.00111951	781.27	0.00225789
g__Ihubacter	116.002	0.00111923	506.81	0.00146469
g__Thiothrix	115.747	0.00111677	1043.88	0.00301684
g__Geminicoccus	115.671	0.00111603	2022.79	0.00584592
g__Natronosporangium	115.401	0.00111343	264.83	0.00076537
g__Candidatus_Phytoplasma	114.886	0.00110846	1564.06	0.00452016
g__Yinghuangia	114.873	0.00110834	766.606	0.00221551
g__Desulfocapsa	114.786	0.00110749	455.073	0.00131517
g__Glutamicibacter	114.693	0.0011066	144.513	0.00041765
g__Nitrosococcus	114.551	0.00110523	404.603	0.00116931
g__Coemansia	114.447	0.00110423	2346.96	0.00678278
g__unclassified_c__Thermoprotei	114.276	0.00110258	357.623	0.00103354
g__Calderihabitans	114.22	0.00110204	336.123	0.0009714
g__Loktanella	114.208	0.00110192	731.34	0.00211359
g__Gigaspora	114.109	0.00110096	5456.63	0.0157698
g__Cystoisospora	113.897	0.00109892	881.037	0.00254622
g__Dimargaris	113.641	0.00109645	291.05	0.00084114
g__Myxococcus	113.624	0.00109629	565.726	0.00163496
g__Leisingera	113.595	0.00109601	1474.6	0.00426163
g__unclassified_p__Candidatus_Krumholzibacteriota	113.454	0.00109465	93.0275	0.00026885
g__Azotobacter	112.929	0.00108958	695.428	0.0020098
g__Candidatus_Amulumruptor	112.723	0.0010876	1569.82	0.00453681
g__Lentimicrobium	112.594	0.00108635	3668.27	0.0106014
g__Piptocephalis	112.581	0.00108622	275.332	0.00079572
g__Peltigera	112.375	0.00108424	0	0
g__Cellulosimicrobium	112.243	0.00108296	373.231	0.00107864
g__Sphaerospermopsis	111.917	0.00107982	275.148	0.00079518
g__Thermoactinomyces	111.803	0.00107872	673.417	0.00194619
g__Oscillochloris	111.615	0.00107691	360.782	0.00104267
g__Thiovibrio	111.246	0.00107335	217.74	0.00062927
g__Cypionkella	111.225	0.00107314	361.542	0.00104486
g__Rugosimonospora	111.171	0.00107262	739.371	0.0021368
g__Sideroxyarcus	110.932	0.00107031	153.442	0.00044345
g__Afipia	110.672	0.0010678	4450.82	0.012863
g__Perkinsus	110.596	0.00106707	324.352	0.00093738
g__Opitutus	110.555	0.00106667	407.361	0.00117728
g__unclassified_p__candidate_division_WWE3	110.49	0.00106604	679.744	0.00196447
g__Dyadobacter	110.428	0.00106545	1150.47	0.00332489
g__Pseudobdellovibrio	110.02	0.00106152	86.9573	0.00025131
g__unclassified_p__Candidatus_Gracilibacteria	109.908	0.00106043	47217.6	0.13646
g__Oligosphaera	109.887	0.00106023	424.88	0.00122791
g__Gordonibacillus	109.692	0.00105835	226.657	0.00065504
g__Natronobacillus	109.642	0.00105786	110.081	0.00031814
g__Echinicola	109.339	0.00105494	462.658	0.00133709
g__Candidatus_Hydrogenedens	109.265	0.00105422	223.576	0.00064614
g__Symbioplanes	108.994	0.00105161	174.129	0.00050324
g__Aquibacillus	108.889	0.0010506	526.665	0.00152207
g__Anaerophaga	108.787	0.00104962	338.017	0.00097688
g__Nitrosospira	108.636	0.00104816	846.243	0.00244566
g__Moellerella	108.342	0.00104532	13.4636	3.891e-05
g__Pseudogulbenkiania	108.242	0.00104436	110.583	0.00031959
g__Clathrospora	107.779	0.0010399	0	0
g__Candidatus_Magnetoglobus	107.748	0.00103959	107.987	0.00031208
g__unclassified_p__Candidatus_Lokiarchaeota	107.562	0.00103779	785.544	0.00227024
g__Pigmentiphaga	107.422	0.00103645	412.391	0.00119182
g__Nocardiopsis	107.368	0.00103593	1327.13	0.00383543
g__Actinomyces	107.262	0.0010349	1752.69	0.0050653
g__Labilibaculum	107.146	0.00103378	1560.06	0.00450862
g__Desulfospira	106.955	0.00103194	277.129	0.00080091
g__unclassified_p__Candidatus_Goldiibacteriota	106.955	0.00103194	207.042	0.00059836
g__unclassified_f__Nostocaceae	106.948	0.00103187	331.712	0.00095866
g__Thermovorax	106.837	0.0010308	246.889	0.00071352
g__Desemzia	106.518	0.00102773	232.93	0.00067317
g__Blattamonas	106.479	0.00102735	335.189	0.0009687
g__Salpingoeca	106.379	0.00102638	4906.86	0.0141809
g__Didymella	106.333	0.00102594	40.053	0.00011575
g__Candidatus_Muiribacterium	106.095	0.00102365	153.428	0.00044341
g__Desulfonatronospira	105.918	0.00102193	878.209	0.00253804
g__Liquorilactobacillus	105.906	0.00102182	300.761	0.00086921
g__Arcicella	105.342	0.00101638	503.951	0.00145643
g__Candidatus_Coliplasma	105.265	0.00101563	359.401	0.00103868
g__Paucimonas	105.23	0.00101529	303.09	0.00087594
g__Phaeosphaeria	105.196	0.00101497	1.2074	3.49e-06
g__Halteria	105.15	0.00101452	70.963	0.00020508
g__Rubellimicrobium	105.111	0.00101415	918.774	0.00265528
g__Adhaeribacter	105.097	0.00101401	340.307	0.00098349
g__Anaeromyces	105.071	0.00101377	1169.2	0.00337902
g__Flavisolibacter	104.978	0.00101286	2987.55	0.00863408
g__Fibrisoma	104.765	0.00101081	274.863	0.00079436
g__Aphanizomenon	104.691	0.0010101	204.802	0.00059188
g__Nitrolancea	104.378	0.00100708	695.255	0.0020093
g__unclassified_o__Thermoplasmatales	104.268	0.00100602	680.576	0.00196688
g__Proteus	104.05	0.00100391	412.471	0.00119205
g__Phytoactinopolyspora	103.832	0.00100181	514.113	0.0014858
g__Tumebacillus	103.602	0.00099959	712.385	0.00205881
g__Ancylomarina	103.554	0.00099913	1381.37	0.0039922
g__Kistimonas	103.48	0.00099841	121.99	0.00035255
g__Nitrosophilus	103.441	0.00099804	50.8942	0.00014709
g__Kaistia	103.355	0.0009972	2979.01	0.00860942
g__Ruminococcoides	103.196	0.00099567	667.637	0.00192948
g__Hoyosella	103.141	0.00099514	302.715	0.00087485
g__Candidatus_Ornithoclostridium	103.073	0.00099448	4692.38	0.0135611
g__Psychroflexus	102.868	0.00099251	525.421	0.00151848
g__Rivularia	102.473	0.0009887	1317.08	0.00380638
g__Aquifex	102.441	0.00098839	273.046	0.00078911
g__Candidatus_Alectryobacillus	102.276	0.00098679	535.862	0.00154865
g__Fertoeibacter	102.267	0.00098671	84.104	0.00024306
g__Luteimonas	102.208	0.00098614	703.428	0.00203292
g__Terasakiella	102.137	0.00098545	2975.89	0.0086004
g__Neoroseomonas	102.1	0.0009851	491.644	0.00142086
g__Pusillimonas	102.034	0.00098446	252.162	0.00072875
g__Monosiga	101.948	0.00098363	3537.94	0.0102247
g__Chitinimonas	101.168	0.0009761	187.131	0.00054081
g__Crossiella	101.138	0.00097581	333.097	0.00096266
g__Candidatus_Avitreponema	101.009	0.00097457	168.657	0.00048742
g__Atopostipes	100.962	0.00097411	1602.16	0.00463028
g__Exserohilum	100.86	0.00097313	2.4527	7.09e-06
g__Filomicrobium	100.832	0.00097286	73930.7	0.213661
g__Candidatus_Aveggerthella	100.428	0.00096897	177.743	0.00051368
g__Stecheria	100.222	0.00096698	27.9906	8.089e-05
g__Candidatus_Izemoplasma	100.031	0.00096513	879.842	0.00254276
g__unclassified_f__Candidatus_Saccharimonadaceae	100.031	0.00096513	1590.72	0.00459722
g__Fischerella	99.9598	0.00096445	90.2906	0.00026094
g__Candidatus_Crickella	99.8511	0.0009634	695.369	0.00200963
g__Porticoccus	99.808	0.00096298	180.676	0.00052216
g__Musicola	99.5921	0.0009609	0	0
g__Ruoffia	99.1832	0.00095696	483.473	0.00139725
g__unclassified_p__candidate_division_FCPU426	99.0208	0.00095539	273.6	0.00079071
g__Acetobacteroides	98.7497	0.00095277	3559.93	0.0102883
g__Desulforhabdus	98.6472	0.00095178	671.524	0.00194072
g__Terrilactibacillus	98.6372	0.00095169	367.548	0.00106222
g__Stentor	98.2998	0.00094843	279.478	0.0008077
g__Desulfacinum	98.2273	0.00094773	151.099	0.00043668
g__Scardovia	98.106	0.00094656	93.3075	0.00026966
g__Lactimicrobium	98.021	0.00094574	69.4109	0.0002006
g__Shigella	97.9366	0.00094493	882.821	0.00255137
g__Zoogloea	97.8608	0.0009442	1336.72	0.00386316
g__Siculibacillus	97.2561	0.00093836	493.833	0.00142719
g__Candidatus_Cybelea	97.1061	0.00093692	710.828	0.00205431
g__Rummeliibacillus	96.9996	0.00093589	466.327	0.0013477
g__Candidatus_Fokinia	96.9965	0.00093586	3.4267	9.9e-06
g__Mariniphaga	96.9912	0.00093581	2766.99	0.00799665
g__Thermosediminibacter	96.9426	0.00093534	571.032	0.0016503
g__Candidatus_Chromulinivorax	96.8806	0.00093474	23.7454	6.862e-05
g__Biomaibacter	96.6757	0.00093276	950.502	0.00274697
g__Entomohabitans	96.2887	0.00092903	542.88	0.00156893
g__Mesostigma	96.2726	0.00092887	24.1751	6.987e-05
g__Frischella	96.2632	0.00092878	200.281	0.00057882
g__unclassified_p__Candidatus_Sungiibacteriota	96.1942	0.00092812	445.934	0.00128876
g__Tardiphaga	96.0462	0.00092669	2173.29	0.00628085
g__Candidatus_Limadaptatus	95.6135	0.00092251	694.894	0.00200826
g__Pontiella	95.5683	0.00092208	626.261	0.00180991
g__Sutcliffiella	95.5277	0.00092169	509.168	0.00147151
g__Enterorhabdus	95.5035	0.00092145	188.087	0.00054358
g__Hahella	95.4802	0.00092123	280.568	0.00081085
g__Anaeroarcus	95.1926	0.00091845	117.565	0.00033976
g__Variibacter	95.0789	0.00091736	3221.62	0.00931054
g__Ornithinimicrobium	95.0011	0.00091661	662.471	0.00191456
g__Candidatus_Avelusimicrobium	94.7949	0.00091462	1152.32	0.00333022
g__Deferrisoma	94.5803	0.00091255	115.66	0.00033426
g__Symbiodinium	94.5466	0.00091222	986.722	0.00285165
g__Kribbibacterium	94.4301	0.0009111	42.6321	0.00012321
g__Brachymonas	94.4146	0.00091095	287.719	0.00083151
g__Saccharomonospora	94.3684	0.0009105	544.741	0.00157431
g__unclassified_p__Candidatus_Firestoneibacteriota	94.3103	0.00090994	60.332	0.00017436
g__Ezakiella	94.0744	0.00090766	386.643	0.00111741
g__Setomelanomma	93.9961	0.00090691	0.9983	2.89e-06
g__Methylotenera	93.991	0.00090686	237.879	0.00068748
g__Kamptonema	93.9897	0.00090685	65.6326	0.00018968
g__Marinifilum	93.6233	0.00090331	1984.15	0.00573424
g__Moraxella	93.5496	0.0009026	258.307	0.00074651
g__Atribacter	93.4534	0.00090167	760.236	0.0021971
g__Candidatus_Brachybacter	93.3967	0.00090113	70.7916	0.00020459
g__Methylocapsa	93.3457	0.00090063	979.572	0.00283098
g__Catenuloplanes	93.2535	0.00089974	250.861	0.00072499
g__Thermomonospora	93.1819	0.00089905	527.696	0.00152505
g__Candidatus_Minthosoma	93.1771	0.00089901	180.181	0.00052073
g__Planosporangium	93.0905	0.00089817	269.35	0.00077843
g__Microvirgula	93.0226	0.00089752	233.905	0.00067599
g__unclassified_o__Candidatus_Peribacterales	92.9639	0.00089695	1183.11	0.00341921
g__Inquilinus	92.9435	0.00089675	2144.94	0.00619892
g__Carboxydocella	92.9035	0.00089637	288.557	0.00083393
g__Verrucomicrobium	92.8701	0.00089604	125.712	0.00036331
g__unclassified_f__Chroococcidiopsidaceae	92.6534	0.00089395	105.648	0.00030532
g__Singulisphaera	92.62	0.00089363	1190.56	0.00344073
g__Castellaniella	92.426	0.00089176	669.631	0.00193525
g__Roseiarcus	92.4011	0.00089152	4024.82	0.0116318
g__Hoministercoradaptatus	92.0656	0.00088828	36.9962	0.00010692
g__Methanoregula	92.0609	0.00088824	1557.79	0.00450204
g__Litoribacterium	92.0011	0.00088766	23.6657	6.839e-05
g__Paramecium	91.9099	0.00088678	624.74	0.00180551
g__Ndongobacter	91.7947	0.00088567	219.144	0.00063333
g__Ellagibacter	91.7568	0.0008853	264.366	0.00076402
g__Acidiferrimicrobium	91.5505	0.00088331	2966.41	0.008573
g__Solwaraspora	90.9931	0.00087793	171.709	0.00049624
g__Xiamenia	90.9593	0.00087761	112.773	0.00032592
g__Streptohalobacillus	90.9152	0.00087718	62.7756	0.00018142
g__Flagellimonas	90.7518	0.00087561	576.138	0.00166505
g__Caulobacter	90.6188	0.00087432	1917.47	0.00554154
g__unclassified_p__Candidatus_Uhrbacteria	90.5302	0.00087347	822.85	0.00237805
g__Edaphovirga	90.4478	0.00087267	287.39	0.00083056
g__Sneathiella	90.3138	0.00087138	4300.03	0.0124272
g__unclassified_c__Methanomicrobia	90.2345	0.00087062	269.144	0.00077783
g__Thermicanus	90.2153	0.00087043	188.641	0.00054518
g__Thermohalobacter	90.0564	0.0008689	1841.16	0.00532099
g__Roseibium	90.0119	0.00086847	14676.7	0.042416
g__Vulcanibacillus	89.7205	0.00086566	672.95	0.00194484
g__Jejuia	89.459	0.00086313	81.4831	0.00023549
g__Candidatus_Iainarchaeum	89.0369	0.00085906	303.005	0.00087569
g__Parvibaculum	88.9487	0.00085821	4641.01	0.0134126
g__Floricoccus	88.851	0.00085727	101.376	0.00029298
g__Berryella	88.8496	0.00085725	47.1037	0.00013613
g__Candidatus_Ordinivivax	88.8094	0.00085687	1091.14	0.00315341
g__Paenactinomyces	88.5294	0.00085416	143.647	0.00041514
g__Vitrella	88.4707	0.0008536	273.28	0.00078979
g__Simkania	88.4497	0.0008534	4932.81	0.0142559
g__Aggregatibacter	88.3574	0.0008525	1832.02	0.00529458
g__Candidatus_Villigracilis	88.3077	0.00085202	669.592	0.00193514
g__Capillibacterium	88.008	0.00084913	294.142	0.00085008
g__Oscillatoria	87.9601	0.00084867	235.771	0.00068138
g__Formivibrio	87.8956	0.00084805	57.3053	0.00016561
g__Citrifermentans	87.6253	0.00084544	37.7244	0.00010902
g__Rosenbergiella	87.5717	0.00084492	426.585	0.00123284
g__Rhizobacter	87.4701	0.00084394	458.637	0.00132547
g__Rahnella	87.2509	0.00084183	135.835	0.00039257
g__Candidatus_Caccoplasma	87.2072	0.00084141	2716.68	0.00785127
g__Solibacillus	87.1559	0.00084091	718.723	0.00207712
g__Perspicuibacillus	87.1419	0.00084078	52.4983	0.00015172
g__Psychromonas	87.1346	0.00084071	321.22	0.00092833
g__Altererythrobacter	87.0172	0.00083957	332.747	0.00096165
g__Salinibacterium	86.9376	0.00083881	1207.74	0.00349039
g__Steroidobacter	86.8662	0.00083812	393.058	0.00113595
g__Planctomyces	86.5308	0.00083488	2338.11	0.0067572
g__Phormidium	86.3224	0.00083287	274.682	0.00079384
g__Trueperella	86.2506	0.00083218	295.283	0.00085337
g__Brasilonema	86.1883	0.00083158	73.2461	0.00021168
g__Sarcocystis	86.0945	0.00083067	413.277	0.00119438
g__Streptoalloteichus	86.0231	0.00082998	277.068	0.00080073
g__Syntrophothermus	85.9051	0.00082884	232.58	0.00067216
g__Thiorhodococcus	85.6909	0.00082678	1018.59	0.00294375
g__Segeticoccus	85.3963	0.00082393	420.129	0.00121418
g__Pseudarthrobacter	85.3594	0.00082358	309.743	0.00089516
g__Fervidibacillus	85.3515	0.0008235	169.578	0.00049008
g__Phelipanche	84.6323	0.00081656	0	0
g__Asterophora	84.4654	0.00081495	0	0
g__Paramuribaculum	84.4288	0.0008146	1526.21	0.00441077
g__Circinella	84.4023	0.00081434	2886.35	0.00834162
g__Gemmatimonas	84.2992	0.00081335	898.243	0.00259594
g__Winogradskyella	84.1115	0.00081154	1272.85	0.00367856
g__Propionibacterium	83.8942	0.00080944	540.758	0.0015628
g__Desulfofundulus	83.8702	0.00080921	394.391	0.0011398
g__Candidatus_Galligastranaerophilus	83.7393	0.00080795	405.789	0.00117274
g__unclassified_f__Nitrosopumilaceae	83.6065	0.00080667	598.066	0.00172842
g__Hyalangium	83.577	0.00080638	277.539	0.00080209
g__Bellilinea	83.5566	0.00080618	873.228	0.00252365
g__Tessaracoccus	83.2689	0.00080341	436.234	0.00126073
g__Candidatus_Carbobacillus	83.1865	0.00080261	42.1537	0.00012183
g__Aliivibrio	83.127	0.00080204	9365.97	0.0270678
g__Roseivirga	83.0345	0.00080115	380.532	0.00109974
g__Calidifontibacillus	82.837	0.00079924	195.518	0.00056505
g__Exilispira	82.7545	0.00079845	182.446	0.00052727
g__Trichocoleus	82.7048	0.00079797	123.466	0.00035682
g__unclassified_f__Phaeosphaeriaceae	82.6449	0.00079739	0	0
g__Isosphaera	82.594	0.0007969	562.451	0.00162549
g__Olivibacter	82.5197	0.00079618	290.745	0.00084026
g__Gluconobacter	82.4715	0.00079572	422.911	0.00122222
g__Actimicrobium	82.414	0.00079516	26.2326	7.581e-05
g__Desulfoferrobacter	82.3663	0.0007947	152.633	0.00044111
g__Paradesulfitobacterium	82.3263	0.00079431	750.576	0.00216918
g__Candidatus_Methanoperedens	82.2613	0.00079369	349.814	0.00101097
g__Thermophilibacter	82.1086	0.00079221	172.422	0.0004983
g__Anaerobacillus	82.093	0.00079206	1039.83	0.00300513
g__Friedmanniella	81.8108	0.00078934	240.422	0.00069482
g__Ewingella	81.8005	0.00078924	37.0496	0.00010707
g__Mageeibacillus	81.7892	0.00078913	553.891	0.00160076
g__Curtobacterium	81.7088	0.00078836	245.113	0.00070838
g__Candidatus_Ancillula	81.5982	0.00078729	184.885	0.00053432
g__Pasteurella	81.5181	0.00078652	365.478	0.00105624
g__Globicatella	81.509	0.00078643	1822	0.00526562
g__Alkalilimnicola	81.496	0.0007863	269.865	0.00077991
g__Protaetiibacter	81.2588	0.00078401	117.976	0.00034095
g__Candidatus_Kuenenia	80.9734	0.00078126	98.2092	0.00028383
g__Vaginimicrobium	80.9226	0.00078077	13.6479	3.944e-05
g__Nitrospina	80.8726	0.00078029	1150	0.00332353
g__Myroides	80.6292	0.00077794	957.879	0.00276829
g__Flectobacillus	80.5967	0.00077763	223.59	0.00064618
g__Salsuginibacillus	80.4877	0.00077657	40.5409	0.00011716
g__unclassified_f__Ackermannviridae	80.3398	0.00077515	2931.86	0.00847315
g__Candidatus_Fimousia	80.3271	0.00077502	571.347	0.00165121
g__Curvularia	80.0659	0.0007725	4.6261	1.337e-05
g__Pullulanibacillus	80.048	0.00077233	323.739	0.00093561
g__Micropruina	79.9745	0.00077162	308.422	0.00089135
g__Mesoplasma	79.9567	0.00077145	2571.65	0.00743212
g__Plateaulakevirus	79.8447	0.00077037	50.7732	0.00014674
g__Allofustis	79.4108	0.00076618	157.371	0.00045481
g__Shouchella	79.3303	0.00076541	564.864	0.00163247
g__Sulfurifustis	79.2652	0.00076478	263.758	0.00076227
g__Hippea	79.0447	0.00076265	126.744	0.00036629
g__Demequina	79.0302	0.00076251	1453.78	0.00420144
g__Microaerobacter	78.9442	0.00076168	341.712	0.00098756
g__Thalassobaculum	78.794	0.00076023	3087.41	0.00892268
g__Salinicoccus	78.6578	0.00075892	939.823	0.00271611
g__Propionigenium	78.6498	0.00075884	842.435	0.00243465
g__Morganella_f__Morganellaceae	78.4712	0.00075712	411.457	0.00118912
g__Haloferula	78.4511	0.00075693	154.194	0.00044562
g__Candidatus_Scatosoma	78.4171	0.0007566	629.654	0.00181971
g__Candidatus_Merdivivens	78.2744	0.00075522	1219.29	0.00352377
g__Kordiimonas	78.2676	0.00075515	1968.87	0.00569008
g__Anaeramoeba	78.0827	0.00075337	751.782	0.00217267
g__Pseudenterobacter	77.8617	0.00075124	27.412	7.922e-05
g__Candolleomyces	77.8186	0.00075082	0	0
g__unclassified_p__Candidatus_Thorarchaeota	77.7594	0.00075025	1874.71	0.00541796
g__Candidatus_Alloenteromonas	77.6	0.00074871	262.455	0.0007585
g__Methylomarinum	77.5362	0.0007481	196.443	0.00056773
g__Candidatus_Colimonas	76.8335	0.00074132	256.78	0.0007421
g__Parolsenella	76.74	0.00074042	164.856	0.00047644
g__Gabonia	76.4201	0.00073733	277.25	0.00080126
g__Candidatus_Aquicultor	76.3974	0.00073711	239.883	0.00069327
g__unclassified_p__Candidatus_Thermoplasmatota	76.23	0.00073549	1096.89	0.00317002
g__Smaragdicoccus	75.9396	0.00073269	986.402	0.00285072
g__Thioflexithrix	75.8751	0.00073207	34.6485	0.00010013
g__Gallaecimonas	75.7727	0.00073108	48.5342	0.00014026
g__Candidatus_Limimonas	75.677	0.00073016	1038.22	0.00300047
g__Franconibacter	75.6321	0.00072973	72.2945	0.00020893
g__Chondrus	75.3893	0.00072738	2573.37	0.0074371
g__Thalassotalea	75.1171	0.00072476	338.688	0.00097882
g__Billgrantia	75.0188	0.00072381	628.045	0.00181506
g__Promicromonospora	74.9654	0.00072329	345.846	0.0009995
g__Nitrosopumilus	74.9042	0.0007227	3935.99	0.0113751
g__Sphingosinicella	74.8994	0.00072266	745.671	0.00215501
g__Fermentimonas	74.851	0.00072219	2725.27	0.00787609
g__Neorhizobium	74.8381	0.00072206	1322.22	0.00382123
g__unclassified_p__Candidatus_Colwelliibacteriota	74.7874	0.00072158	88.509	0.00025579
g__Thiolapillus	74.743	0.00072115	843.411	0.00243747
g__Candidatus_Fermentibacter	74.6265	0.00072002	176.885	0.0005112
g__Frigoribacterium	74.5867	0.00071964	162.664	0.0004701
g__Gracilinema	74.5353	0.00071914	268.978	0.00077735
g__Empedobacter	74.4537	0.00071836	689.197	0.00199179
g__Pseudorhizobium	74.2874	0.00071675	1296.92	0.00374814
g__Methylovulum	74.2666	0.00071655	812.469	0.00234805
g__Tangfeifania	74.1044	0.00071499	293.032	0.00084687
g__Candidatus_Enterocola	73.9841	0.00071383	715.826	0.00206875
g__Meiothermus	73.8027	0.00071207	250.566	0.00072414
g__Candidatus_Methylacidithermus	73.7819	0.00071187	161.756	0.00046748
g__Symbiobacterium	73.7321	0.00071139	353.698	0.0010222
g__Methylicorpusculum	73.6664	0.00071076	40.5701	0.00011725
g__Amoeboaphelidium	73.5245	0.00070939	454.678	0.00131403
g__unclassified_c__Candidatus_Abyssobacteria	73.3834	0.00070803	166.504	0.0004812
g__Ideonella	73.3323	0.00070754	501.863	0.00145039
g__Ascochyta	73.3064	0.00070729	32.512	9.396e-05
g__Phoenicibacter	72.9748	0.00070409	453.213	0.0013098
g__Chrysochromulina	72.9511	0.00070386	198.01	0.00057225
g__Endozoicomonas	72.7245	0.00070167	5190.87	0.0150017
g__Evansella	72.7113	0.00070155	264.858	0.00076545
g__Falsibacillus	72.6515	0.00070097	62.8986	0.00018178
g__Terribacillus	72.6369	0.00070083	1157.73	0.00334586
g__Desmonostoc	72.604	0.00070051	44.8562	0.00012964
g__Rhodopila	72.5556	0.00070004	1435.69	0.00414917
g__Pseudobacteriovorax	72.5128	0.00069963	93.4401	0.00027004
g__Salicibibacter	72.4494	0.00069902	124.152	0.0003588
g__Azovibrio	72.3485	0.00069804	35.2295	0.00010181
g__Agriterribacter	72.3479	0.00069804	383.547	0.00110846
g__Bullifex	72.134	0.00069597	1000.88	0.00289255
g__Glaciihabitans	72.0565	0.00069523	87.399	0.00025258
g__Deschampsia	72.0547	0.00069521	0	0
g__Siminovitchia	72.0395	0.00069506	213.113	0.0006159
g__Cerasibacillus	71.9899	0.00069458	64.0376	0.00018507
g__Candidatus_Psychracetigena	71.9628	0.00069432	130.841	0.00037813
g__Candidatus_Megaera	71.7539	0.00069231	3485.41	0.0100729
g__Candidatus_Caldarchaeum	71.6657	0.00069146	2.6691	7.71e-06
g__Secundilactobacillus	71.5717	0.00069055	333.573	0.00096403
g__Candidatus_Midichloria	71.4262	0.00068915	990.454	0.00286243
g__Pseudovibrio	71.2985	0.00068791	1329.5	0.00384228
g__Ophiobolus	71.2604	0.00068755	0	0
g__Smeringurus	70.846	0.00068355	0	0
g__Thiodictyon	70.7943	0.00068305	824.18	0.0023819
g__Aquimarina	70.7439	0.00068256	901.373	0.00260499
g__Parvibacter	70.6891	0.00068203	90.6853	0.00026208
g__Thermodesulforhabdus	70.6474	0.00068163	34.0226	9.833e-05
g__Methylocystis	70.5992	0.00068117	4388.55	0.012683
g__Candidatus_Nitrosotenuis	70.4857	0.00068007	82.5189	0.00023848
g__Porphyrobacter	70.393	0.00067918	104.657	0.00030246
g__Angustibacter	70.2785	0.00067807	412.706	0.00119273
g__Fluviicoccus	70.182	0.00067714	731.899	0.0021152
g__Aquirufa	70.1772	0.0006771	83.7197	0.00024195
g__Massilibacterium	70.0775	0.00067613	2858.83	0.00826208
g__Defluviimonas	69.8731	0.00067416	4885.31	0.0141186
g__Thermodesulfatator	69.7295	0.00067278	93.6767	0.00027073
g__Salinisphaera	69.5785	0.00067132	344.18	0.00099469
g__Kiloniella	69.5154	0.00067071	2636.68	0.00762006
g__Methylomicrobium	69.2431	0.00066808	987.481	0.00285384
g__Candidatus_Flexifilum	69.2202	0.00066786	454.008	0.00131209
g__Pollutimonas	69.1855	0.00066753	473.778	0.00136923
g__Fuerstiella	69.1646	0.00066732	2499.61	0.00722393
g__unclassified_p__Candidatus_Absconditabacteria	68.9895	0.00066564	3575.01	0.0103319
g__Alcaligenes	68.936	0.00066512	215.457	0.00062268
g__Varibaculum	68.7741	0.00066356	85.1971	0.00024622
g__Salegentibacter	68.685	0.0006627	443.319	0.0012812
g__Petrotoga	68.6523	0.00066238	620.376	0.0017929
g__Dolosigranulum	68.545	0.00066135	61.9857	0.00017914
g__Metasolibacillus	68.3517	0.00065948	696.837	0.00201387
g__Mycosarcoma	68.2313	0.00065832	0	0
g__Chloroflexus	68.1093	0.00065714	280.894	0.00081179
g__Bibersteinia	68.0834	0.00065689	136.137	0.00039344
g__Chelatococcus	67.9782	0.00065588	2745.81	0.00793546
g__Williamwhitmania	67.7768	0.00065393	2179.12	0.00629769
g__Streblomastix	67.6653	0.00065286	884.51	0.00255625
g__Parafannyhessea	67.6064	0.00065229	96.6882	0.00027943
g__Roseimicrobium	67.4824	0.00065109	197.843	0.00057177
g__Aquibium	67.4438	0.00065072	2872.83	0.00830254
g__Olegusella	67.3062	0.00064939	69.2347	0.00020009
g__Brotocaccenecus	67.2632	0.00064898	281.558	0.00081371
g__Puteibacter	67.246	0.00064881	1188.13	0.00343372
g__Sorangium	67.1847	0.00064822	1038.39	0.00300096
g__Kibdelosporangium	67.1603	0.00064799	929.469	0.00268619
g__Pseudolysinimonas	66.8952	0.00064543	517.494	0.00149557
g__unclassified_p__candidate_division_CSSED10-310	66.7402	0.00064393	546.304	0.00157883
g__Cyanobium	66.6881	0.00064343	240.554	0.00069521
g__Paraglomus	66.4997	0.00064161	376.772	0.00108888
g__Candidatus_Caccalectryoclostridium	66.4996	0.00064161	891.139	0.00257541
g__Candidatus_Spyradosoma	66.2471	0.00063918	47.9506	0.00013858
g__Candidatus_Scybalousia_(ex_Gilroy_et_al._2022)	66.2099	0.00063882	1947.44	0.00562814
g__Candidatus_Merdousia	66.204	0.00063876	110.015	0.00031794
g__Candidatus_Amoebophilus	66.1998	0.00063872	2724.25	0.00787314
g__Periconia	66.1744	0.00063847	29.5586	8.543e-05
g__Sodiomyces	66.1151	0.0006379	0	0
g__Sapientia	66.1118	0.00063787	83.6471	0.00024174
g__Candidatus_Magnetomorum	66.1042	0.0006378	216.969	0.00062705
g__unclassified_c__Candidatus_Hadarchaeia	66.0116	0.0006369	61.249	0.00017701
g__Urbifossiella	65.9753	0.00063655	1163.54	0.00336265
g__Stemphylium	65.9307	0.00063612	27.7416	8.017e-05
g__Salinispora	65.8865	0.0006357	162.357	0.00046922
g__Kutzneria	65.8287	0.00063514	522.346	0.00150959
g__Pseudoneobacillus	65.7794	0.00063466	248.984	0.00071957
g__Methanomethylophilus	65.7461	0.00063434	161.408	0.00046647
g__Actinocrinis	65.7454	0.00063434	319.105	0.00092222
g__Sulfuricella	65.6343	0.00063326	486.64	0.0014064
g__Croceibacterium	64.9608	0.00062677	339.247	0.00098043
g__Orbus	64.9279	0.00062645	32.46	9.381e-05
g__Bdellovibrio	64.8655	0.00062585	717.077	0.00207237
g__Apibacter	64.8534	0.00062573	748.176	0.00216225
g__Maricaulis	64.8149	0.00062536	1747.12	0.00504921
g__Ferrovibrio	64.7897	0.00062511	2166.05	0.00625992
g__Thermomicrobium	64.6161	0.00062344	633.232	0.00183005
g__Janibacter	64.5524	0.00062283	258.688	0.00074761
g__Sphaerobacter	64.4455	0.00062179	612.142	0.0017691
g__Allochromatium	64.3553	0.00062092	289.086	0.00083547
g__Chlorella	64.2825	0.00062022	15.3841	4.446e-05
g__Macrococcoides	64.1923	0.00061935	2942.66	0.00850435
g__Decorospora	63.9393	0.00061691	0	0
g__Fuscovulum	63.8176	0.00061574	314.901	0.00091007
g__Shimia	63.5712	0.00061336	2795.15	0.00807805
g__Limnochorda	63.5197	0.00061286	461.709	0.00133435
g__Arthrocladium	63.4793	0.00061247	52.3769	0.00015137
g__Taibaiella	63.444	0.00061213	762.104	0.0022025
g__Nodosilinea	63.4422	0.00061211	599.188	0.00173166
g__Spirulina	63.3984	0.00061169	260.224	0.00075205
g__Bergeyella	63.2604	0.00061036	280.51	0.00081068
g__Haliangium	63.1551	0.00060934	512.308	0.00148058
g__Candidatus_Methylumidiphilus	63.1475	0.00060927	85.3311	0.00024661
g__unclassified_f__Leptolyngbyaceae	63.1241	0.00060904	883.827	0.00255428
g__Fuchsiella	63.0272	0.00060811	71.4118	0.00020638
g__Lacipirellula	62.9556	0.00060742	10171.5	0.0293959
g__Candidatus_Limihabitans	62.9232	0.00060711	955.526	0.00276149
g__Longilinea	62.8893	0.00060678	279.462	0.00080765
g__unclassified_o__Rickettsiales	62.7559	0.00060549	1901.57	0.00549559
g__Thermanaerovibrio	62.6971	0.00060492	1809.54	0.00522962
g__unclassified_p__Candidatus_Daviesbacteria	62.6746	0.00060471	445.498	0.0012875
g__Leptobacterium	62.6737	0.0006047	21.5804	6.237e-05
g__Mesoterricola	62.6457	0.00060443	47.2625	0.00013659
g__Brevefilum	62.6094	0.00060408	145.4	0.00042021
g__Tetrahymena	62.5913	0.0006039	1381.6	0.00399286
g__Anncaliia	62.5631	0.00060363	13269	0.0383476
g__unclassified_f__Parvoviridae	62.5535	0.00060354	9041.84	0.0261311
g__Spirilliplanes	62.5271	0.00060328	77.7996	0.00022484
g__Oryza	62.4524	0.00060256	34.4883	9.967e-05
[truncated: 4,304 more rows]
